# Supplementary material for: SARS-CoV-2 infection reduces the number of spermatogonial stem cells and dysregulates the transcriptional landscape of the human testis
Source: Research Square preprint supplement (doi:10.21203/rs.3.rs-9371895/v1), 2026-04-21
Supplement: Supplementary file 1 [file 1b94ddaa064fdcc83f35d157.docx]

**Supplementary Table 13. Samples used in each experiment.**

| **Experiment** | **Samples used control** | **Samples used COVID-19** |
| --- | --- | --- |
| **PAS-Hematoxylin Johnsen Score, DAPI nuclei count, PARP1, TUNEL, CD3, CD68, SOX9+, SOX9+γH2AX+, SOX9+TUNEL+, UTF1+, UTF1+γH2AX+, UTF1+TUNEL+** | **23:** 2568, 2023A, 2040A, 2049A, 2066A, 2459A, 2647A, 2840A, A17-038, A18-031, A18-035, A2-C21027_12, A2-C21027_16, A2-C21027_17, A2-C21027_19, A2-C21027_21, B03-8544F, B03-11051 C1, 03BTP210001, Testis Human, 2043B, 3872A, 2460A | **28**: 20038867, #3, #4, 200145227, 03BTP210005, #5, A2-C21027_01, A2-C21027_02, A2-C21027_03, A2-C21027_04, A2-C21027_05, A2-C21027_06, A2-C21027_07, A2-C21027_08, A2-C21027_09, A2-C21027_10, A2-C21027_11, TX200008TU1PF1CR, TX200158TU1PF1CR, TX200211TU1PF1CR, TX200235TU1PF1CR, TX200251TU1PF1CR, TX200330TU1PF1CR, TX200348TU1PF1CR, TX200406TU1PF1CR, TX200465TU1PF1CR, 03BTP210004, 03BTP210006 |
| **snRNAseq** | **5**: Ctrl1, Ctrl2, Ctrl3, Ctrl4, Ctrl5 | **5**: COVID1, COVID2, COVID3, COVID4, COVID5 |
| **Hematoxylin-eosin Johnsen score in biopsies** | **10**: B2201131, B2200313, B2201132, B2200170, B2201024, B2200971, B2200729, B2200873, B2200213, B2200613 | **6**: B2200874, B2200825, B2200929, B2200973, B2200260, B2200312 |
| **UTF1+, UTF1+ γH2AX+ in biopsies** | **9**: B2201131, B2200313, B2201132, B2200170, B2201024, B2200971, B2200729, B2200873, B2200613 | **8**: B2200874, B2200825, B2200929, B2200973, 1156042, B2200260, B2200312, TESE1 |
| **SOX9+, SOX9+ γH2AX+ in biopsies** | **9:** B2201131, B2201132, B2200170, B2201024, B2200971, B2200729, B2200873, B2200213, B2200613 | **6:** B2200874, B2200825, B2200929, B2200973, B2200260, B2200312, |
