# Supplementary material for: SARS-CoV-2 infection reduces the number of spermatogonial stem cells and dysregulates the transcriptional landscape of the human testis
Source: Research Square preprint supplement (doi:10.21203/rs.3.rs-9371895/v1), 2026-04-21
Supplement: Supplementary file 2 [file 2695360545e65c1ac40e511b.docx]

**Supplementary Table 15. Secondary antibodies**

| **Antibody** | **Antigen species** | **Host**  **species** | **Concentration** | **Reference** |
| --- | --- | --- | --- | --- |
| Cy3 | Rabbit | Goat | 1:100 | 111-165-144 |
| FITC | Mouse | Goat | 1:100 | 115-095-003 |
| FITC | Rabbit | Goat | 1:100 | 111-095-045 |
| Cy3 | Mouse | Goat | 1:100 | 115-165-003 |
| Alexa 488 | Mouse | Goat | 1:100 | 115-546-072 |
