# Supplementary material for: SARS-CoV-2 infection reduces the number of spermatogonial stem cells and dysregulates the transcriptional landscape of the human testis
Source: Research Square preprint supplement (doi:10.21203/rs.3.rs-9371895/v1), 2026-04-21
Supplement: Supplementary file 3 [file 4123b71dfa10f261fe7f485d.docx]

**Supplementary table 2. Detection of SARS-CoV-2 RNA through a quantitative real-time PCR.**

| **Sample** | **Type** | **N1** | **N2** | **RNaseP** | **Detection of SARS-CoV-2 RNA** |
| --- | --- | --- | --- | --- | --- |
| A2-C21027_12 | Control | N/A | N/A | 26.08 | Not detected |
| A2-C21027_16 | Control | N/A | N/A | 25.40 | Not detected |
| A2-C21027_17 | Control | N/A | N/A | 23.33 | Not detected |
| A2-C21027_19 | Control | N/A | N/A | 27.99 | Not detected |
| A2-C21027_21 | Control | N/A | N/A | 25.49 | Not detected |
| 03BTP210001 | Control | N/A | N/A | 22.94 | Not detected |
| A17-038 | Control | N/A | N/A | 25.56 | Not detected |
| A18-031 | Control | N/A | N/A | 24.07 | Not detected |
| A18-035 | Control | N/A | N/A | 23.80 | Not detected |
| A2-C21027_01 | COVID-19 | 32.32 | 29.07 | 28.29 | SARS-CoV-2 detected |
| A2-C21027_02 | COVID-19 | N/A | N/A | 28.17 | Not detected |
| A2-C21027_03 | COVID-19 | N/A | N/A | 25.26 | Not detected |
| A2-C21027_04 | COVID-19 | N/A | N/A | 26.97 | Not detected |
| A2-C21027_05 | COVID-19 | 25.95 | 23.01 | 25.66 | SARS-CoV-2 detected |
| A2-C21027_06 | COVID-19 | 37.34 | 35.16 | 25.45 | SARS-CoV-2 detected |
| A2-C21027_07 | COVID-19 | N/A | N/A | 25.97 | Not detected |
| A2-C21027_08 | COVID-19 | 35.69 | 33.25 | 27.61 | SARS-CoV-2 detected |
| A2-C21027_09 | COVID-19 | 31.00 | 28.77 | 24.65 | SARS-CoV-2 detected |
| A2-C21027_10 | COVID-19 | N/A | N/A | 25.48 | Not detected |
| A2-C21027_11 | COVID-19 | 40.20 | N/A | 25.86 | Not detected |
| 03BTP210004 | COVID-19 | N/A | N/A | 27.00 | Not detected |
| 03BTP210005 | COVID-19 | N/A | N/A | 26.10 | Not detected |
| 03BTP210006 | COVID-19 | 20.37 | 18.57 | 26.39 | SARS-CoV-2 detected |
| TX200158TU1PF1CR | COVID-19 | N/A | N/A | 25.17 | Not detected |
| TX200211TU1PF1CR | COVID-19 | N/A | N/A | 29.93 | Not detected |
| TX200235TU1PF1CR | COVID-19 | 36.91 | 37.21 | 26.95 | Inconclusive |
| TX200251TU1PF1CR | COVID-19 | N/A | 40.51 | 28.83 | Not detected |
| TX200330TU1PF1CR | COVID-19 | 40.08 | N/A | 30.50 | Not detected |
| TX200348TU1PF1CR | COVID-19 | N/A | N/A | 28.02 | Not detected |
| TX200378TU1PF1CR | COVID-19 | 40.25 | 41.72 | 28.96 | Not detected |
| TX200406TU1PF1CR | COVID-19 | 35.83 | 37.19 | 31.12 | Inconclusive |
| TX200465TU1PF1CR | COVID-19 | N/A | N/A | 28.01 | Not detected |
| TX210008TU1PF1CR | COVID-19 | N/A | N/A | 26.96 | Not detected |
