# Supplementary material for: SARS-CoV-2 infection reduces the number of spermatogonial stem cells and dysregulates the transcriptional landscape of the human testis
Source: Research Square preprint supplement (doi:10.21203/rs.3.rs-9371895/v1), 2026-04-21
Supplement: Supplementary file 4 [file 4940f3b15bb8b8ff08ddadd0.xlsx]

## Sheet: S.Table 5a. DEG_master
p_val	avg_log2FC	pct.1	pct.2	p_val_adj	gene	cluster	Direction
2.3581e-15	-9.48323	0	0.103	8.41677e-11	AC108134.2	COVID-19 induced	Up_in_Control
1.2162e-11	-7.79975	0	0.077	4.34099e-07	MIA	COVID-19 induced	Up_in_Control
7.66601e-10	-7.46127	0	0.064	2.73623e-05	C2-AS1	COVID-19 induced	Up_in_Control
1.79027e-09	-7.43583	0	0.061	6.39e-05	PAX6	COVID-19 induced	Up_in_Control
9.66037e-17	-6.37607	0.003	0.132	3.44808e-12	AL590434.1	COVID-19 induced	Up_in_Control
4.35098e-26	-6.11811	0.006	0.205	1.55299e-21	HSPA6	COVID-19 induced	Up_in_Control
1.72463e-14	-6.02073	0.003	0.116	6.15571e-10	RPS10-NUDT3	COVID-19 induced	Up_in_Control
1.67806e-05	-5.78566	0.006	0.051	0.598951	SAG	COVID-19 induced	Up_in_Control
8.24708e-15	-5.72293	0.006	0.126	2.94363e-10	RBFOX3	COVID-19 induced	Up_in_Control
2.46009e-06	-5.60092	0.003	0.055	0.0878079	KIF4B	COVID-19 induced	Up_in_Control
5.1405e-06	-5.35557	0.003	0.052	0.18348	AC015845.2	COVID-19 induced	Up_in_Control
5.3168e-07	-5.21035	0.003	0.06	0.0189773	CHRNA5	COVID-19 induced	Up_in_Control
8.15403e-16	-5.18042	0.013	0.146	2.91042e-11	TAF1L	COVID-19 induced	Up_in_Control
8.36144e-07	-5.10391	0.003	0.059	0.0298445	DOK5	COVID-19 induced	Up_in_Control
5.27384e-09	-5.00369	0.006	0.084	0.000188239	CASS4	COVID-19 induced	Up_in_Control
8.96136e-96	-5.0012	0.045	0.618	3.19858e-91	AL627171.2	COVID-19 induced	Up_in_Control
5.71007e-07	-4.85333	0.003	0.06	0.0203809	FP236383.3	COVID-19 induced	Up_in_Control
3.34468e-49	-4.85052	0.051	0.41	1.19382e-44	HSPA1B	COVID-19 induced	Up_in_Control
5.50404e-10	-4.82679	0.013	0.104	1.96456e-05	NKAIN1	COVID-19 induced	Up_in_Control
5.76399e-06	-4.75948	0.003	0.052	0.205734	LRP2	COVID-19 induced	Up_in_Control
2.77233e-06	-4.74383	0.013	0.069	0.0989529	CDH1	COVID-19 induced	Up_in_Control
0.000220187	-4.73051	0.013	0.05	1	JPH3	COVID-19 induced	Up_in_Control
6.25791e-09	-4.71252	0.016	0.097	0.000223364	LONRF3	COVID-19 induced	Up_in_Control
5.83572e-06	-4.62373	0.003	0.052	0.208294	CACNG2	COVID-19 induced	Up_in_Control
2.24539e-17	-4.59118	0.022	0.176	8.01445e-13	PARD6G-AS1	COVID-19 induced	Up_in_Control
6.71683e-05	-4.58301	0.01	0.054	1	ADCY7	COVID-19 induced	Up_in_Control
3.30057e-05	-4.56379	0.006	0.053	1	TRUB2	COVID-19 induced	Up_in_Control
2.06784e-05	-4.54923	0.006	0.055	0.738074	SYNPR	COVID-19 induced	Up_in_Control
1.18468e-41	-4.53616	0.077	0.399	4.22849e-37	HSPA1A	COVID-19 induced	Up_in_Control
1.0098e-06	-4.39237	0.003	0.058	0.0360429	AL009176.1	COVID-19 induced	Up_in_Control
2.07876e-07	-4.33973	0.003	0.064	0.00741974	FCHO1	COVID-19 induced	Up_in_Control
5.57819e-06	-4.29299	0.01	0.066	0.199102	AC005355.1	COVID-19 induced	Up_in_Control
4.17311e-11	-4.27656	0.003	0.091	1.48951e-06	PTPN6	COVID-19 induced	Up_in_Control
1.85748e-05	-4.24345	0.006	0.056	0.66299	ABCB5	COVID-19 induced	Up_in_Control
1.03317e-83	-4.23294	0.147	0.643	3.68768e-79	DNAJB1	COVID-19 induced	Up_in_Control
4.90033e-09	-4.19557	0.013	0.098	0.000174907	NBPF10	COVID-19 induced	Up_in_Control
7.71221e-05	-4.15924	0.006	0.05	1	AP002381.2	COVID-19 induced	Up_in_Control
1.82482e-09	-4.10782	0.006	0.089	6.51334e-05	MKI67	COVID-19 induced	Up_in_Control
5.65812e-07	-4.05383	0.006	0.069	0.0201955	CGAS	COVID-19 induced	Up_in_Control
1.66967e-09	-3.95481	0.013	0.1	5.95956e-05	CAP2	COVID-19 induced	Up_in_Control
1.49253e-06	-3.92389	0.006	0.066	0.0532729	RASGRP3	COVID-19 induced	Up_in_Control
0.000107042	-3.92181	0.006	0.05	1	TYK2	COVID-19 induced	Up_in_Control
0.000328659	-3.86429	0.013	0.055	1	AC005682.2	COVID-19 induced	Up_in_Control
4.18845e-05	-3.82267	0.006	0.053	1	AC093249.2	COVID-19 induced	Up_in_Control
3.44567e-12	-3.78198	0.016	0.132	1.22986e-07	ZNF418	COVID-19 induced	Up_in_Control
4.68637e-06	-3.73474	0.013	0.073	0.167271	C5	COVID-19 induced	Up_in_Control
9.27999e-08	-3.70637	0.019	0.099	0.00331231	CDH3	COVID-19 induced	Up_in_Control
2.67699e-05	-3.68409	0.006	0.055	0.955497	IMPG2	COVID-19 induced	Up_in_Control
9.4586e-06	-3.67446	0.003	0.05	0.337606	PDE6B	COVID-19 induced	Up_in_Control
7.29233e-60	-3.66645	0.196	0.564	2.60285e-55	HSPH1	COVID-19 induced	Up_in_Control
1.46908e-158	-3.66592	0.635	0.918	5.24358e-154	HSP90AA1	COVID-19 induced	Up_in_Control
3.12967e-07	-3.63176	0.022	0.099	0.0111707	ORAI2	COVID-19 induced	Up_in_Control
0.000595063	-3.62307	0.013	0.053	1	LIME1	COVID-19 induced	Up_in_Control
0.000107289	-3.61527	0.013	0.06	1	ZNF211	COVID-19 induced	Up_in_Control
1.97085e-05	-3.54584	0.016	0.072	0.703454	FEM1A	COVID-19 induced	Up_in_Control
6.97747e-06	-3.53955	0.013	0.072	0.249047	AC004674.1	COVID-19 induced	Up_in_Control
4.73292e-05	-3.53128	0.01	0.059	1	LINC02422	COVID-19 induced	Up_in_Control
2.88514e-16	-3.48158	0.029	0.187	1.02979e-11	POM121L2	COVID-19 induced	Up_in_Control
1.30922e-28	-3.47622	0.048	0.303	4.67299e-24	CDK11B	COVID-19 induced	Up_in_Control
7.27797e-06	-3.46721	0.01	0.067	0.259773	AL583785.1	COVID-19 induced	Up_in_Control
8.74017e-07	-3.44893	0.01	0.075	0.0311963	SHOX2	COVID-19 induced	Up_in_Control
1.43468e-09	-3.42726	0.016	0.112	5.12081e-05	ECT2L	COVID-19 induced	Up_in_Control
5.99533e-06	-3.40499	0.01	0.068	0.213991	LGALS4	COVID-19 induced	Up_in_Control
0.00225637	-3.3921	0.016	0.051	1	LINC02798	COVID-19 induced	Up_in_Control
5.66032e-05	-3.38538	0.019	0.072	1	PTAFR	COVID-19 induced	Up_in_Control
5.85656e-06	-3.38364	0.006	0.061	0.209038	LINC01841	COVID-19 induced	Up_in_Control
2.86775e-05	-3.36111	0.01	0.061	1	KLF3-AS1	COVID-19 induced	Up_in_Control
9.42338e-08	-3.34958	0.003	0.065	0.00336349	XG	COVID-19 induced	Up_in_Control
1.35746e-10	-3.33626	0.013	0.113	4.84517e-06	AL354920.1	COVID-19 induced	Up_in_Control
2.36214e-16	-3.32914	0.115	0.254	8.4312e-12	WDR87	COVID-19 induced	Up_in_Control
1.49451e-13	-3.2979	0.029	0.17	5.33435e-09	AC245060.5	COVID-19 induced	Up_in_Control
5.40063e-07	-3.27388	0.01	0.077	0.0192765	AC100793.2	COVID-19 induced	Up_in_Control
1.67842e-05	-3.26372	0.022	0.082	0.59908	AC105290.1	COVID-19 induced	Up_in_Control
2.61073e-05	-3.25296	0.01	0.062	0.931848	AL034417.4	COVID-19 induced	Up_in_Control
7.70089e-06	-3.237	0.01	0.067	0.274868	ZMAT4	COVID-19 induced	Up_in_Control
1.60707e-09	-3.22499	0.038	0.14	5.73613e-05	AC116317.1	COVID-19 induced	Up_in_Control
1.71821e-07	-3.20594	0.006	0.073	0.00613282	DGKG	COVID-19 induced	Up_in_Control
5.27716e-05	-3.18941	0.01	0.06	1	LRRC4B	COVID-19 induced	Up_in_Control
8.628e-10	-3.17271	0.029	0.135	3.07959e-05	ZNF14	COVID-19 induced	Up_in_Control
0.00144785	-3.15524	0.013	0.05	1	LINC01151	COVID-19 induced	Up_in_Control
1.04766e-55	-3.15034	0.244	0.617	3.73941e-51	HSP90AB1	COVID-19 induced	Up_in_Control
0.00131593	-3.15024	0.013	0.05	1	UCP3	COVID-19 induced	Up_in_Control
7.77355e-05	-3.12452	0.026	0.082	1	RNF113B	COVID-19 induced	Up_in_Control
0.000134921	-3.11625	0.022	0.072	1	ZNF3	COVID-19 induced	Up_in_Control
6.68865e-05	-3.11532	0.013	0.064	1	AP1S3	COVID-19 induced	Up_in_Control
0.000834517	-3.11173	0.016	0.056	1	AC124290.1	COVID-19 induced	Up_in_Control
0.00117108	-3.10208	0.013	0.051	1	GPN1	COVID-19 induced	Up_in_Control
6.70376e-06	-3.09975	0.006	0.06	0.239277	GAGE2A	COVID-19 induced	Up_in_Control
2.63239e-05	-3.09658	0.016	0.072	0.93958	CARD11	COVID-19 induced	Up_in_Control
0.00022628	-3.09159	0.013	0.058	1	HNF1A-AS1	COVID-19 induced	Up_in_Control
1.18377e-05	-3.0766	0.01	0.066	0.422522	ZNF841	COVID-19 induced	Up_in_Control
0.000101886	-3.06169	0.016	0.068	1	KNDC1	COVID-19 induced	Up_in_Control
0.000471102	-3.05992	0.01	0.051	1	TVP23A	COVID-19 induced	Up_in_Control
2.45976e-06	-3.05305	0.016	0.082	0.0877962	RAB39A	COVID-19 induced	Up_in_Control
7.53296e-05	-3.04924	0.019	0.072	1	PTPRO	COVID-19 induced	Up_in_Control
3.008e-09	-3.04264	0.022	0.122	0.000107364	LINC02073	COVID-19 induced	Up_in_Control
9.36771e-08	-3.03904	0.026	0.113	0.00334362	TRMT6	COVID-19 induced	Up_in_Control
4.36134e-06	-3.03525	0.003	0.052	0.155669	AC132803.1	COVID-19 induced	Up_in_Control
4.43986e-33	-3.01686	0.08	0.372	1.58472e-28	HSPD1	COVID-19 induced	Up_in_Control
4.79432e-24	-3.01674	0.071	0.305	1.71124e-19	CHD3	COVID-19 induced	Up_in_Control
2.73681e-11	-3.01186	0.035	0.161	9.76851e-07	MFAP1	COVID-19 induced	Up_in_Control
6.55367e-12	-2.97043	0.019	0.138	2.3392e-07	PNLDC1	COVID-19 induced	Up_in_Control
5.39945e-06	-2.94399	0.016	0.08	0.192723	BIN2	COVID-19 induced	Up_in_Control
6.55638e-27	-2.94146	0.035	0.28	2.34017e-22	CMYA5	COVID-19 induced	Up_in_Control
1.79868e-10	-2.93996	0.016	0.12	6.42001e-06	PNMA6E	COVID-19 induced	Up_in_Control
0.000198482	-2.93906	0.022	0.074	1	SRRM3	COVID-19 induced	Up_in_Control
8.13549e-10	-2.93399	0.032	0.143	2.9038e-05	SORCS2	COVID-19 induced	Up_in_Control
9.24639e-08	-2.92407	0.01	0.083	0.00330031	ARSG	COVID-19 induced	Up_in_Control
3.67156e-42	-2.92058	0.103	0.451	1.31049e-37	STIP1	COVID-19 induced	Up_in_Control
1.56507e-06	-2.91256	0.022	0.096	0.0558619	RRM2	COVID-19 induced	Up_in_Control
0.00057179	-2.89354	0.01	0.05	1	AC079793.1	COVID-19 induced	Up_in_Control
0.000300706	-2.87495	0.019	0.066	1	LINC02150	COVID-19 induced	Up_in_Control
0.0015683	-2.86703	0.013	0.051	1	AC012668.3	COVID-19 induced	Up_in_Control
9.29149e-18	-2.8669	0.01	0.157	3.31641e-13	AC010624.5	COVID-19 induced	Up_in_Control
1.46286e-05	-2.86557	0.019	0.083	0.522139	AL022476.1	COVID-19 induced	Up_in_Control
0.00010498	-2.85288	0.035	0.091	1	ADGRL1	COVID-19 induced	Up_in_Control
9.23048e-10	-2.84852	0.013	0.107	3.29464e-05	COLEC11	COVID-19 induced	Up_in_Control
0.000134908	-2.84006	0.026	0.077	1	KCNMB2	COVID-19 induced	Up_in_Control
3.20293e-29	-2.83673	0.288	0.522	1.14322e-24	HSPA5	COVID-19 induced	Up_in_Control
0.000478523	-2.83408	0.016	0.061	1	ESRRB	COVID-19 induced	Up_in_Control
3.9431e-06	-2.80517	0.013	0.077	0.140741	AL035458.2	COVID-19 induced	Up_in_Control
0.00983986	-2.80236	0.019	0.05	1	ZNF213-AS1	COVID-19 induced	Up_in_Control
0.0017046	-2.80232	0.019	0.06	1	BCKDHA	COVID-19 induced	Up_in_Control
9.97515e-05	-2.79714	0.013	0.063	1	ZBTB39	COVID-19 induced	Up_in_Control
1.49485e-06	-2.79597	0.038	0.113	0.0533558	CCNF	COVID-19 induced	Up_in_Control
2.11784e-05	-2.79382	0.013	0.069	0.755921	PNPLA1	COVID-19 induced	Up_in_Control
0.000270308	-2.78896	0.01	0.053	1	GPR1-AS	COVID-19 induced	Up_in_Control
4.11409e-05	-2.78042	0.013	0.068	1	AC008892.1	COVID-19 induced	Up_in_Control
0.000109562	-2.75377	0.006	0.05	1	LCT	COVID-19 induced	Up_in_Control
0.000646657	-2.75348	0.016	0.061	1	AC130324.2	COVID-19 induced	Up_in_Control
4.43259e-07	-2.75217	0.016	0.09	0.0158213	UPB1	COVID-19 induced	Up_in_Control
0.000300859	-2.74881	0.016	0.064	1	LPA	COVID-19 induced	Up_in_Control
4.10612e-05	-2.74401	0.013	0.068	1	SUMF2	COVID-19 induced	Up_in_Control
0.00119975	-2.74156	0.013	0.053	1	AC067956.1	COVID-19 induced	Up_in_Control
0.00510785	-2.73977	0.022	0.058	1	RFC2	COVID-19 induced	Up_in_Control
0.00175514	-2.73113	0.013	0.051	1	DHPS	COVID-19 induced	Up_in_Control
7.08787e-09	-2.73085	0.01	0.091	0.000252987	IDI2-AS1	COVID-19 induced	Up_in_Control
0.0022437	-2.72971	0.019	0.058	1	MRPL48	COVID-19 induced	Up_in_Control
3.69409e-31	-2.72261	0.317	0.541	1.31853e-26	HSP90B1	COVID-19 induced	Up_in_Control
0.000244328	-2.72105	0.026	0.077	1	MAPT	COVID-19 induced	Up_in_Control
0.000702781	-2.72093	0.022	0.068	1	ZNF229	COVID-19 induced	Up_in_Control
0.00156424	-2.71735	0.026	0.063	1	KCNQ2	COVID-19 induced	Up_in_Control
1.80294e-05	-2.71529	0.026	0.089	0.643524	DNA2	COVID-19 induced	Up_in_Control
1.46799e-11	-2.71236	0.019	0.135	5.2397e-07	PSTPIP2	COVID-19 induced	Up_in_Control
2.68608e-05	-2.70438	0.022	0.085	0.958743	SP2	COVID-19 induced	Up_in_Control
1.72365e-05	-2.69899	0.013	0.071	0.615222	ARHGAP8	COVID-19 induced	Up_in_Control
3.75425e-06	-2.69458	0.01	0.07	0.134	TEX13C	COVID-19 induced	Up_in_Control
4.11177e-09	-2.68915	0.038	0.144	0.000146761	NOP2	COVID-19 induced	Up_in_Control
3.24209e-05	-2.68773	0.016	0.074	1	AC092422.1	COVID-19 induced	Up_in_Control
2.74457e-06	-2.68763	0.013	0.077	0.097962	PKD1L3	COVID-19 induced	Up_in_Control
0.00348677	-2.68543	0.019	0.058	1	PRUNE1	COVID-19 induced	Up_in_Control
3.30738e-05	-2.68086	0.013	0.068	1	LINC02343	COVID-19 induced	Up_in_Control
1.66267e-13	-2.6796	0.045	0.198	5.93457e-09	JUN	COVID-19 induced	Up_in_Control
1.59645e-07	-2.67675	0.026	0.113	0.0056982	ZNF701	COVID-19 induced	Up_in_Control
0.000154011	-2.66243	0.013	0.062	1	AC026333.3	COVID-19 induced	Up_in_Control
0.000357505	-2.65979	0.019	0.068	1	LINC01756	COVID-19 induced	Up_in_Control
0.000187844	-2.65027	0.026	0.079	1	ZNF93	COVID-19 induced	Up_in_Control
1.07119e-13	-2.64983	0.026	0.166	3.8234e-09	OTUD6A	COVID-19 induced	Up_in_Control
0.000438589	-2.64291	0.01	0.052	1	HSH2D	COVID-19 induced	Up_in_Control
1.29588e-20	-2.64105	0.212	0.403	4.62537e-16	CENPF	COVID-19 induced	Up_in_Control
3.74875e-06	-2.63838	0.038	0.113	0.133804	AC093515.1	COVID-19 induced	Up_in_Control
2.615e-05	-2.62879	0.01	0.063	0.933373	PRKCQ	COVID-19 induced	Up_in_Control
0.00130012	-2.62596	0.013	0.052	1	TIMELESS	COVID-19 induced	Up_in_Control
0.00328692	-2.62539	0.016	0.053	1	UGDH	COVID-19 induced	Up_in_Control
0.000429517	-2.60396	0.022	0.069	1	PIK3CD	COVID-19 induced	Up_in_Control
3.36745e-45	-2.59601	0.176	0.54	1.20195e-40	SPEN	COVID-19 induced	Up_in_Control
0.000360791	-2.59125	0.01	0.052	1	LINC01618	COVID-19 induced	Up_in_Control
0.00149044	-2.58451	0.016	0.057	1	LY96	COVID-19 induced	Up_in_Control
4.42619e-07	-2.56094	0.032	0.116	0.0157984	AC007262.2	COVID-19 induced	Up_in_Control
0.000216038	-2.55978	0.013	0.061	1	EDAR	COVID-19 induced	Up_in_Control
2.89447e-06	-2.55511	0.013	0.078	0.103312	AC092115.3	COVID-19 induced	Up_in_Control
0.00796154	-2.5543	0.019	0.051	1	SULF1	COVID-19 induced	Up_in_Control
3.92237e-18	-2.55284	0.071	0.267	1.40001e-13	LINC00877	COVID-19 induced	Up_in_Control
1.27634e-17	-2.54899	0.061	0.255	4.55565e-13	CCDC59	COVID-19 induced	Up_in_Control
0.0053737	-2.54853	0.019	0.055	1	RAB3B	COVID-19 induced	Up_in_Control
4.26633e-07	-2.54384	0.006	0.07	0.0152278	NDOR1	COVID-19 induced	Up_in_Control
2.86096e-05	-2.54187	0.019	0.077	1	FAM81A	COVID-19 induced	Up_in_Control
3.38133e-06	-2.53933	0.006	0.061	0.12069	TMC2	COVID-19 induced	Up_in_Control
8.62186e-06	-2.53753	0.013	0.074	0.30774	AC108477.2	COVID-19 induced	Up_in_Control
0.000186033	-2.53743	0.01	0.055	1	TPH2	COVID-19 induced	Up_in_Control
0.00235856	-2.53734	0.022	0.062	1	AC073320.1	COVID-19 induced	Up_in_Control
7.75609e-08	-2.5367	0.029	0.122	0.00276838	KIF1A	COVID-19 induced	Up_in_Control
0.000228223	-2.53274	0.019	0.072	1	MCF2L	COVID-19 induced	Up_in_Control
2.25964e-16	-2.52359	0.022	0.179	8.06535e-12	SNX31	COVID-19 induced	Up_in_Control
0.000638164	-2.50403	0.016	0.061	1	RHPN2	COVID-19 induced	Up_in_Control
1.21409e-07	-2.49479	0.032	0.119	0.00433345	PLEKHG4B	COVID-19 induced	Up_in_Control
0.000477412	-2.49408	0.026	0.074	1	LINC02680	COVID-19 induced	Up_in_Control
6.03068e-22	-2.49021	0.119	0.347	2.15253e-17	GML	COVID-19 induced	Up_in_Control
1.2236e-07	-2.48926	0.019	0.103	0.0043674	KCNMB3	COVID-19 induced	Up_in_Control
1.8433e-14	-2.48447	0.032	0.184	6.5793e-10	GCNA	COVID-19 induced	Up_in_Control
2.98408e-09	-2.48166	0.01	0.093	0.000106511	LINC00310	COVID-19 induced	Up_in_Control
1.11471e-07	-2.48127	0.013	0.088	0.00397873	SEZ6L	COVID-19 induced	Up_in_Control
5.63977e-06	-2.48117	0.019	0.087	0.2013	EEF1AKMT1	COVID-19 induced	Up_in_Control
7.35144e-06	-2.47959	0.022	0.092	0.262395	ADPRHL1	COVID-19 induced	Up_in_Control
0.00350125	-2.47615	0.016	0.054	1	PPFIA3	COVID-19 induced	Up_in_Control
1.03488e-14	-2.4734	0.067	0.233	3.69378e-10	ZNF778	COVID-19 induced	Up_in_Control
6.22711e-07	-2.46277	0.029	0.113	0.0222264	ZNF441	COVID-19 induced	Up_in_Control
9.19843e-05	-2.45882	0.01	0.058	1	TENM3-AS1	COVID-19 induced	Up_in_Control
0.00389186	-2.45881	0.029	0.067	1	CHEK2	COVID-19 induced	Up_in_Control
2.46934e-10	-2.45359	0.061	0.189	8.81383e-06	CCDC174	COVID-19 induced	Up_in_Control
9.44544e-07	-2.44768	0.01	0.074	0.0337136	ANK1	COVID-19 induced	Up_in_Control
4.14754e-10	-2.44092	0.051	0.175	1.48038e-05	CTCFL	COVID-19 induced	Up_in_Control
2.27194e-06	-2.42904	0.029	0.107	0.0810924	NOP14-AS1	COVID-19 induced	Up_in_Control
0.000503038	-2.42621	0.022	0.073	1	SLC5A11	COVID-19 induced	Up_in_Control
0.00040456	-2.42174	0.013	0.058	1	ZNF710	COVID-19 induced	Up_in_Control
8.84718e-06	-2.42012	0.006	0.059	0.315782	AC005487.1	COVID-19 induced	Up_in_Control
0.000115253	-2.41933	0.029	0.088	1	HIP1R	COVID-19 induced	Up_in_Control
0.0123668	-2.4111	0.022	0.052	1	FAM9C	COVID-19 induced	Up_in_Control
0.000535831	-2.40682	0.032	0.078	1	NBPF20	COVID-19 induced	Up_in_Control
2.0632e-07	-2.39936	0.045	0.14	0.00736417	PPP1R15A	COVID-19 induced	Up_in_Control
3.7604e-06	-2.3986	0.061	0.121	0.13422	SAMD15	COVID-19 induced	Up_in_Control
0.00630337	-2.39335	0.019	0.054	1	AL024495.1	COVID-19 induced	Up_in_Control
2.43758e-06	-2.39275	0.064	0.152	0.0870045	AC007952.4	COVID-19 induced	Up_in_Control
0.00783515	-2.39175	0.026	0.059	1	GPRASP1	COVID-19 induced	Up_in_Control
0.000166901	-2.38422	0.019	0.073	1	DOCK11	COVID-19 induced	Up_in_Control
6.64086e-06	-2.38174	0.029	0.103	0.237032	NBPF14	COVID-19 induced	Up_in_Control
1.5523e-50	-2.37867	0.218	0.607	5.54061e-46	BAZ1B	COVID-19 induced	Up_in_Control
2.0305e-12	-2.37816	0.061	0.21	7.24746e-08	PASD1	COVID-19 induced	Up_in_Control
0.000801222	-2.37009	0.013	0.055	1	TRIM72	COVID-19 induced	Up_in_Control
3.37166e-07	-2.36996	0.022	0.105	0.0120345	LRRTM4	COVID-19 induced	Up_in_Control
0.013439	-2.36565	0.022	0.056	1	KIF5A	COVID-19 induced	Up_in_Control
9.44992e-06	-2.36511	0.029	0.102	0.337296	BLM	COVID-19 induced	Up_in_Control
0.000510756	-2.36279	0.022	0.072	1	MAP2K6	COVID-19 induced	Up_in_Control
5.23894e-05	-2.36031	0.019	0.077	1	LINC00907	COVID-19 induced	Up_in_Control
0.000413358	-2.35453	0.013	0.058	1	KCNN1	COVID-19 induced	Up_in_Control
1.41749e-06	-2.35168	0.042	0.126	0.0505944	EXOSC10	COVID-19 induced	Up_in_Control
0.000150168	-2.34639	0.022	0.078	1	LINC02208	COVID-19 induced	Up_in_Control
2.14498e-06	-2.34162	0.01	0.071	0.0765608	WDR49	COVID-19 induced	Up_in_Control
0.0331728	-2.34146	0.026	0.05	1	ITPRID1	COVID-19 induced	Up_in_Control
6.96945e-09	-2.34109	0.029	0.132	0.000248761	CCDC88C	COVID-19 induced	Up_in_Control
0.000354985	-2.33944	0.013	0.059	1	ZNF852	COVID-19 induced	Up_in_Control
0.00240187	-2.33731	0.026	0.069	1	ZNF202	COVID-19 induced	Up_in_Control
0.000725136	-2.33728	0.019	0.066	1	DPYSL5	COVID-19 induced	Up_in_Control
2.99047e-05	-2.33704	0.026	0.09	1	UNC13C	COVID-19 induced	Up_in_Control
9.96113e-21	-2.33556	0.067	0.292	3.55543e-16	AHNAK	COVID-19 induced	Up_in_Control
2.9711e-05	-2.33532	0.035	0.104	1	ATRIP	COVID-19 induced	Up_in_Control
1.78363e-16	-2.33494	0.032	0.198	6.36631e-12	LRRC4C	COVID-19 induced	Up_in_Control
0.00274988	-2.33259	0.029	0.068	1	SLCO2B1	COVID-19 induced	Up_in_Control
0.000561213	-2.33197	0.019	0.067	1	XACT	COVID-19 induced	Up_in_Control
0.000299979	-2.33156	0.016	0.065	1	UNC13A	COVID-19 induced	Up_in_Control
1.89049e-07	-2.32966	0.022	0.107	0.00674773	LINC00276	COVID-19 induced	Up_in_Control
1.80043e-12	-2.32901	0.026	0.156	6.42626e-08	AC092100.1	COVID-19 induced	Up_in_Control
6.27648e-09	-2.32348	0.054	0.168	0.000224027	CCDC137	COVID-19 induced	Up_in_Control
0.00059642	-2.32055	0.016	0.061	1	AC105450.1	COVID-19 induced	Up_in_Control
6.23239e-09	-2.31969	0.013	0.1	0.000222453	AC006197.2	COVID-19 induced	Up_in_Control
0.00406127	-2.31853	0.022	0.061	1	HARS2	COVID-19 induced	Up_in_Control
0.00055847	-2.3161	0.013	0.057	1	ZNF556	COVID-19 induced	Up_in_Control
2.75001e-09	-2.31589	0.061	0.18	9.81561e-05	KARS	COVID-19 induced	Up_in_Control
0.00438216	-2.31552	0.016	0.05	1	LINC02341	COVID-19 induced	Up_in_Control
0.000442392	-2.31418	0.019	0.069	1	CCDC127	COVID-19 induced	Up_in_Control
9.48097e-05	-2.31387	0.022	0.081	1	ATP8B1	COVID-19 induced	Up_in_Control
0.00742401	-2.30543	0.029	0.065	1	RFPL1S	COVID-19 induced	Up_in_Control
1.82405e-09	-2.29738	0.048	0.168	6.5106e-05	GADD45B	COVID-19 induced	Up_in_Control
1.71204e-37	-2.28856	0.333	0.638	6.11079e-33	PTMA	COVID-19 induced	Up_in_Control
0.000275289	-2.28341	0.01	0.053	1	AC012443.2	COVID-19 induced	Up_in_Control
1.88595e-60	-2.2813	0.34	0.718	6.73153e-56	SRRM2	COVID-19 induced	Up_in_Control
0.0518759	-2.28024	0.029	0.051	1	AC022558.2	COVID-19 induced	Up_in_Control
3.0536e-10	-2.27939	0.051	0.181	1.08992e-05	TCOF1	COVID-19 induced	Up_in_Control
0.000410168	-2.27877	0.016	0.063	1	EPCAM-DT	COVID-19 induced	Up_in_Control
0.00441322	-2.27212	0.029	0.073	1	HIST3H3	COVID-19 induced	Up_in_Control
6.8121e-05	-2.26871	0.026	0.087	1	LINC02770	COVID-19 induced	Up_in_Control
0.00334423	-2.26476	0.022	0.064	1	LTA	COVID-19 induced	Up_in_Control
1.69368e-05	-2.26084	0.01	0.064	0.604527	FBXL19-AS1	COVID-19 induced	Up_in_Control
5.6665e-10	-2.25909	0.029	0.142	2.02254e-05	TUBGCP6	COVID-19 induced	Up_in_Control
1.62117e-27	-2.25897	0.179	0.455	5.78643e-23	RNMT	COVID-19 induced	Up_in_Control
5.45721e-09	-2.2569	0.083	0.192	0.000194784	ZNF850	COVID-19 induced	Up_in_Control
5.20701e-40	-2.25615	0.369	0.641	1.85854e-35	TPR	COVID-19 induced	Up_in_Control
0.000869985	-2.25524	0.019	0.066	1	CBX8	COVID-19 induced	Up_in_Control
0.00030407	-2.25448	0.016	0.065	1	BTBD11	COVID-19 induced	Up_in_Control
7.08764e-17	-2.25408	0.038	0.214	2.52979e-12	HSPA1L	COVID-19 induced	Up_in_Control
7.74378e-12	-2.24532	0.064	0.21	2.76399e-07	BCLAF3	COVID-19 induced	Up_in_Control
3.16691e-29	-2.24497	0.154	0.451	1.13037e-24	SUPT16H	COVID-19 induced	Up_in_Control
0.000259483	-2.24487	0.016	0.065	1	LINC01234	COVID-19 induced	Up_in_Control
1.65267e-09	-2.24441	0.051	0.173	5.89886e-05	ZNF155	COVID-19 induced	Up_in_Control
0.00024011	-2.24136	0.016	0.065	1	AL157786.1	COVID-19 induced	Up_in_Control
0.000151491	-2.23789	0.022	0.079	1	AC079160.1	COVID-19 induced	Up_in_Control
0.000154495	-2.2297	0.013	0.062	1	ZNF620	COVID-19 induced	Up_in_Control
0.000629581	-2.22731	0.01	0.05	1	LINC02141	COVID-19 induced	Up_in_Control
0.0148346	-2.21898	0.032	0.071	1	PIGX	COVID-19 induced	Up_in_Control
3.11056e-08	-2.21808	0.048	0.156	0.00111025	H1F0	COVID-19 induced	Up_in_Control
1.06763e-57	-2.21555	0.337	0.734	3.8107e-53	PRRC2C	COVID-19 induced	Up_in_Control
1.54358e-11	-2.20816	0.051	0.193	5.50949e-07	KIF1C	COVID-19 induced	Up_in_Control
9.00363e-06	-2.20702	0.045	0.121	0.321367	AL121992.1	COVID-19 induced	Up_in_Control
2.20992e-07	-2.20458	0.01	0.079	0.00788788	LAT2	COVID-19 induced	Up_in_Control
1.9595e-05	-2.20248	0.032	0.104	0.699405	BRPF1	COVID-19 induced	Up_in_Control
7.83957e-06	-2.19634	0.029	0.102	0.279818	FAM171A1	COVID-19 induced	Up_in_Control
2.17753e-11	-2.19613	0.071	0.217	7.77226e-07	TTF2	COVID-19 induced	Up_in_Control
1.95186e-13	-2.1928	0.08	0.243	6.96676e-09	FAM161A	COVID-19 induced	Up_in_Control
5.28608e-10	-2.19079	0.042	0.164	1.88676e-05	NGDN	COVID-19 induced	Up_in_Control
3.99069e-15	-2.18714	0.071	0.247	1.4244e-10	CLK3	COVID-19 induced	Up_in_Control
3.78201e-11	-2.18537	0.08	0.222	1.34991e-06	VCX3A	COVID-19 induced	Up_in_Control
2.56382e-31	-2.18458	0.212	0.498	9.15104e-27	MPHOSPH8	COVID-19 induced	Up_in_Control
2.41264e-09	-2.18042	0.038	0.153	8.61145e-05	CNTNAP5	COVID-19 induced	Up_in_Control
0.000955249	-2.17451	0.026	0.075	1	AC022893.1	COVID-19 induced	Up_in_Control
1.40971e-11	-2.17359	0.122	0.272	5.03166e-07	TTN	COVID-19 induced	Up_in_Control
9.27872e-06	-2.17165	0.013	0.073	0.331185	TBXAS1	COVID-19 induced	Up_in_Control
0.000702638	-2.17084	0.013	0.056	1	SNHG15	COVID-19 induced	Up_in_Control
2.47124e-09	-2.16867	0.042	0.156	8.8206e-05	SPAG5	COVID-19 induced	Up_in_Control
1.44769e-19	-2.16259	0.093	0.316	5.16724e-15	CDK11A	COVID-19 induced	Up_in_Control
0.000141191	-2.16241	0.029	0.088	1	ERVK3-1	COVID-19 induced	Up_in_Control
8.95217e-07	-2.16203	0.029	0.112	0.031953	OGFOD1	COVID-19 induced	Up_in_Control
1.61844e-15	-2.16024	0.071	0.255	5.77669e-11	FKBP4	COVID-19 induced	Up_in_Control
0.00253182	-2.15897	0.022	0.065	1	PDE4C	COVID-19 induced	Up_in_Control
0.00148257	-2.15403	0.013	0.052	1	DNER	COVID-19 induced	Up_in_Control
1.83441e-25	-2.15131	0.122	0.397	6.54756e-21	CHD8	COVID-19 induced	Up_in_Control
1.58134e-05	-2.14304	0.016	0.077	0.564427	KAT14	COVID-19 induced	Up_in_Control
6.89208e-59	-2.14135	0.34	0.697	2.45999e-54	SMG1	COVID-19 induced	Up_in_Control
4.5822e-06	-2.13823	0.042	0.124	0.163552	RAB8A	COVID-19 induced	Up_in_Control
0.000511088	-2.13635	0.013	0.057	1	TMCO4	COVID-19 induced	Up_in_Control
8.00161e-27	-2.13329	0.24	0.47	2.85602e-22	SMC3	COVID-19 induced	Up_in_Control
1.66615e-30	-2.13301	0.186	0.499	5.947e-26	RBFOX1	COVID-19 induced	Up_in_Control
4.93335e-05	-2.13232	0.038	0.105	1	OIP5	COVID-19 induced	Up_in_Control
1.12154e-09	-2.12755	0.061	0.189	4.00311e-05	TARS	COVID-19 induced	Up_in_Control
2.10738e-06	-2.12103	0.051	0.14	0.0752187	RRAGC	COVID-19 induced	Up_in_Control
0.000403676	-2.1141	0.01	0.052	1	C2	COVID-19 induced	Up_in_Control
0.000343155	-2.11344	0.042	0.101	1	ZNF667	COVID-19 induced	Up_in_Control
0.00137546	-2.11217	0.022	0.069	1	SLC26A5	COVID-19 induced	Up_in_Control
0.000746554	-2.10936	0.029	0.08	1	NUP210	COVID-19 induced	Up_in_Control
5.57646e-11	-2.10878	0.058	0.195	1.99041e-06	PHRF1	COVID-19 induced	Up_in_Control
0.00264103	-2.10869	0.016	0.056	1	AMPD3	COVID-19 induced	Up_in_Control
5.13867e-12	-2.10817	0.058	0.207	1.83415e-07	ELOA	COVID-19 induced	Up_in_Control
1.36631e-09	-2.10703	0.051	0.171	4.87676e-05	TICRR	COVID-19 induced	Up_in_Control
1.8212e-35	-2.10618	0.196	0.555	6.5004e-31	MTRNR2L12	COVID-19 induced	Up_in_Control
6.87953e-05	-2.10568	0.01	0.059	1	PLXNA2	COVID-19 induced	Up_in_Control
3.28722e-06	-2.09963	0.022	0.096	0.117331	ENGASE	COVID-19 induced	Up_in_Control
5.29875e-18	-2.09847	0.051	0.247	1.89128e-13	NOM1	COVID-19 induced	Up_in_Control
1.50409e-05	-2.09353	0.032	0.105	0.536854	SATB1-AS1	COVID-19 induced	Up_in_Control
0.00046606	-2.09093	0.013	0.058	1	MED22	COVID-19 induced	Up_in_Control
9.20852e-11	-2.08919	0.048	0.181	3.2868e-06	LRSAM1	COVID-19 induced	Up_in_Control
0.00823814	-2.08798	0.016	0.05	1	ZAN	COVID-19 induced	Up_in_Control
1.01558e-22	-2.08718	0.096	0.347	3.6249e-18	NOP58	COVID-19 induced	Up_in_Control
1.87316e-07	-2.08684	0.022	0.107	0.00668588	BRIX1	COVID-19 induced	Up_in_Control
0.000116132	-2.08514	0.032	0.093	1	POLD1	COVID-19 induced	Up_in_Control
8.56144e-06	-2.08512	0.045	0.124	0.305583	NKAP	COVID-19 induced	Up_in_Control
8.51843e-06	-2.08474	0.019	0.086	0.304048	AC006262.1	COVID-19 induced	Up_in_Control
4.44832e-06	-2.0799	0.042	0.127	0.158774	SSRP1	COVID-19 induced	Up_in_Control
8.96054e-22	-2.07638	0.147	0.377	3.19829e-17	DHX34	COVID-19 induced	Up_in_Control
3.7038e-10	-2.07364	0.006	0.086	1.322e-05	SLC5A5	COVID-19 induced	Up_in_Control
4.85214e-23	-2.07333	0.147	0.413	1.73187e-18	MDN1	COVID-19 induced	Up_in_Control
0.000345869	-2.07332	0.016	0.065	1	CLVS1	COVID-19 induced	Up_in_Control
1.23534e-22	-2.07081	0.173	0.434	4.40931e-18	SMARCA4	COVID-19 induced	Up_in_Control
0.000405421	-2.06974	0.038	0.098	1	CEP55	COVID-19 induced	Up_in_Control
1.32202e-15	-2.06832	0.154	0.353	4.71869e-11	PRPF38B	COVID-19 induced	Up_in_Control
2.86231e-14	-2.06762	0.125	0.297	1.02165e-09	ZNF844	COVID-19 induced	Up_in_Control
1.91879e-09	-2.06579	0.093	0.206	6.84875e-05	POTEE	COVID-19 induced	Up_in_Control
0.000266043	-2.06566	0.022	0.075	1	LINC02694	COVID-19 induced	Up_in_Control
6.46591e-06	-2.06481	0.016	0.081	0.230788	LRP2BP	COVID-19 induced	Up_in_Control
1.45498e-31	-2.0634	0.26	0.5	5.19326e-27	BRD2	COVID-19 induced	Up_in_Control
1.28477e-24	-2.06196	0.192	0.462	4.58572e-20	PER3	COVID-19 induced	Up_in_Control
1.59095e-11	-2.06076	0.058	0.203	5.67857e-07	WDR76	COVID-19 induced	Up_in_Control
0.00277705	-2.05973	0.035	0.074	1	TATDN2	COVID-19 induced	Up_in_Control
0.000384158	-2.05724	0.01	0.052	1	IL18BP	COVID-19 induced	Up_in_Control
3.89929e-27	-2.05571	0.176	0.462	1.39177e-22	HSPA8	COVID-19 induced	Up_in_Control
7.98466e-06	-2.05219	0.035	0.11	0.284997	VIPR2	COVID-19 induced	Up_in_Control
0.000902002	-2.05028	0.016	0.061	1	TMEM44	COVID-19 induced	Up_in_Control
0.0108331	-2.04902	0.022	0.057	1	PAGE5	COVID-19 induced	Up_in_Control
0.000777493	-2.04844	0.013	0.055	1	VPS16	COVID-19 induced	Up_in_Control
1.6967e-17	-2.04791	0.151	0.349	6.05601e-13	CLSPN	COVID-19 induced	Up_in_Control
0.00966505	-2.04544	0.035	0.073	1	HEBP2	COVID-19 induced	Up_in_Control
4.67369e-26	-2.04232	0.208	0.456	1.66818e-21	DNAJB6	COVID-19 induced	Up_in_Control
1.02283e-10	-2.0407	0.051	0.186	3.65079e-06	ABCA3	COVID-19 induced	Up_in_Control
0.000882724	-2.04063	0.022	0.072	1	DSCAML1	COVID-19 induced	Up_in_Control
1.01805e-06	-2.04031	0.067	0.162	0.0363373	AC240274.1	COVID-19 induced	Up_in_Control
0.000230184	-2.04007	0.042	0.102	1	ZNF460	COVID-19 induced	Up_in_Control
1.3543e-09	-2.03922	0.058	0.186	4.8339e-05	VAMP8	COVID-19 induced	Up_in_Control
4.09861e-06	-2.03878	0.032	0.111	0.146292	HAVCR2	COVID-19 induced	Up_in_Control
1.18534e-05	-2.03874	0.026	0.096	0.423085	RPH3AL	COVID-19 induced	Up_in_Control
1.83542e-08	-2.03845	0.026	0.122	0.000655115	LINC02006	COVID-19 induced	Up_in_Control
0.00521917	-2.0372	0.022	0.062	1	ANKRD13D	COVID-19 induced	Up_in_Control
0.000347879	-2.03676	0.019	0.07	1	BRSK1	COVID-19 induced	Up_in_Control
3.08584e-09	-2.03648	0.135	0.246	0.000110143	LRRCC1	COVID-19 induced	Up_in_Control
9.94523e-14	-2.03444	0.071	0.243	3.54975e-09	USP36	COVID-19 induced	Up_in_Control
6.72941e-06	-2.03431	0.038	0.113	0.240193	TMEM120B	COVID-19 induced	Up_in_Control
4.83914e-27	-2.03163	0.308	0.47	1.72723e-22	TOP2A	COVID-19 induced	Up_in_Control
8.14432e-11	-2.03066	0.042	0.172	2.90695e-06	SLU7	COVID-19 induced	Up_in_Control
2.65575e-34	-2.03028	0.253	0.569	9.47916e-30	PCNT	COVID-19 induced	Up_in_Control
7.39833e-07	-2.02909	0.022	0.101	0.0264069	NPAP1	COVID-19 induced	Up_in_Control
1.76277e-33	-2.02674	0.298	0.58	6.29184e-29	EIF5B	COVID-19 induced	Up_in_Control
0.000147658	-2.02487	0.01	0.054	1	AC090125.1	COVID-19 induced	Up_in_Control
8.92446e-12	-2.02295	0.032	0.163	3.18541e-07	SNRPA	COVID-19 induced	Up_in_Control
9.11468e-06	-2.02185	0.051	0.133	0.32533	GOLM1	COVID-19 induced	Up_in_Control
0.00230295	-2.02175	0.032	0.069	1	LIMK1	COVID-19 induced	Up_in_Control
0.000961227	-2.02146	0.022	0.07	1	PXDN	COVID-19 induced	Up_in_Control
0.00125097	-2.02029	0.013	0.053	1	AC009435.1	COVID-19 induced	Up_in_Control
1.71596e-06	-2.0164	0.01	0.071	0.0612479	MYOF	COVID-19 induced	Up_in_Control
1.08266e-08	-2.01151	0.013	0.095	0.000386435	P4HA2	COVID-19 induced	Up_in_Control
1.75076e-07	-2.01105	0.038	0.133	0.00624898	BEND2	COVID-19 induced	Up_in_Control
1.46138e-16	-2.00876	0.147	0.338	5.21611e-12	TKTL1	COVID-19 induced	Up_in_Control
1.68487e-13	-2.00798	0.071	0.236	6.01381e-09	NPIPB5	COVID-19 induced	Up_in_Control
3.65449e-07	-2.00667	0.054	0.154	0.013044	FAM178B	COVID-19 induced	Up_in_Control
0.00539524	-2.00281	0.019	0.058	1	CCDC170	COVID-19 induced	Up_in_Control
8.48593e-11	-2.00029	0.045	0.177	3.02888e-06	PTDSS2	COVID-19 induced	Up_in_Control
8.53278e-30	-1.99888	0.285	0.542	3.04561e-25	BOD1L1	COVID-19 induced	Up_in_Control
0.00378052	-1.9987	0.045	0.088	1	SPTY2D1	COVID-19 induced	Up_in_Control
4.44038e-09	-1.99839	0.061	0.183	0.00015849	TMEM132D	COVID-19 induced	Up_in_Control
8.9069e-11	-1.99755	0.208	0.326	3.17914e-06	CCDC136	COVID-19 induced	Up_in_Control
1.52411e-18	-1.99655	0.054	0.256	5.44002e-14	NOP56	COVID-19 induced	Up_in_Control
4.58102e-05	-1.99646	0.006	0.051	1	ZNF665	COVID-19 induced	Up_in_Control
0.00274305	-1.99515	0.013	0.05	1	PRR5	COVID-19 induced	Up_in_Control
0.00758893	-1.99362	0.019	0.055	1	GYS1	COVID-19 induced	Up_in_Control
1.33773e-11	-1.98854	0.077	0.23	4.77474e-07	ZKSCAN5	COVID-19 induced	Up_in_Control
0.0141718	-1.98779	0.042	0.069	1	SHCBP1	COVID-19 induced	Up_in_Control
0.0227194	-1.98562	0.022	0.052	1	GABRA3	COVID-19 induced	Up_in_Control
9.96141e-06	-1.98394	0.074	0.154	0.355553	PIK3IP1-AS1	COVID-19 induced	Up_in_Control
0.0227718	-1.98372	0.026	0.058	1	TMEM184B	COVID-19 induced	Up_in_Control
1.0629e-08	-1.98029	0.077	0.196	0.000379381	ZBTB46-AS1	COVID-19 induced	Up_in_Control
3.50766e-07	-1.97798	0.045	0.142	0.0125199	TACC2	COVID-19 induced	Up_in_Control
0.000406809	-1.97424	0.016	0.064	1	KCNG2	COVID-19 induced	Up_in_Control
0.00267922	-1.97386	0.032	0.079	1	ZFP41	COVID-19 induced	Up_in_Control
5.25784e-13	-1.97372	0.01	0.118	1.87668e-08	PLA2G4C	COVID-19 induced	Up_in_Control
0.000398118	-1.97144	0.029	0.084	1	MEGF11	COVID-19 induced	Up_in_Control
1.02102e-07	-1.9647	0.045	0.148	0.00364433	GRK5	COVID-19 induced	Up_in_Control
0.0291807	-1.96239	0.038	0.066	1	AC091932.1	COVID-19 induced	Up_in_Control
1.88155e-07	-1.96051	0.029	0.119	0.00671581	LINC01934	COVID-19 induced	Up_in_Control
6.83602e-05	-1.95991	0.019	0.077	1	SOHLH1	COVID-19 induced	Up_in_Control
2.3654e-09	-1.95904	0.067	0.196	8.44283e-05	CDC6	COVID-19 induced	Up_in_Control
0.000333692	-1.95817	0.022	0.076	1	SCUBE2	COVID-19 induced	Up_in_Control
8.23845e-30	-1.95671	0.196	0.511	2.94055e-25	DYNC1H1	COVID-19 induced	Up_in_Control
9.32549e-05	-1.95632	0.026	0.087	1	ZNF549	COVID-19 induced	Up_in_Control
0.00422776	-1.9555	0.032	0.077	1	ZNF77	COVID-19 induced	Up_in_Control
0.0077863	-1.95439	0.019	0.055	1	BCAS4	COVID-19 induced	Up_in_Control
8.69746e-29	-1.94812	0.324	0.596	3.10438e-24	GOLGB1	COVID-19 induced	Up_in_Control
5.59982e-22	-1.94806	0.157	0.41	1.99874e-17	PRPF8	COVID-19 induced	Up_in_Control
7.11494e-44	-1.94759	0.458	0.706	2.53954e-39	CEP350	COVID-19 induced	Up_in_Control
0.0292394	-1.94701	0.029	0.058	1	PBLD	COVID-19 induced	Up_in_Control
2.72195e-24	-1.94572	0.179	0.434	9.71547e-20	ICE1	COVID-19 induced	Up_in_Control
5.11118e-16	-1.94448	0.138	0.341	1.82433e-11	USP42	COVID-19 induced	Up_in_Control
0.00170163	-1.94328	0.019	0.063	1	LINC01924	COVID-19 induced	Up_in_Control
0.000323685	-1.94264	0.013	0.058	1	FAM9A	COVID-19 induced	Up_in_Control
6.79251e-05	-1.94236	0.064	0.115	1	AC138819.1	COVID-19 induced	Up_in_Control
0.00732169	-1.9413	0.029	0.069	1	ANKRD33B	COVID-19 induced	Up_in_Control
6.61112e-15	-1.93722	0.163	0.353	2.35971e-10	CDCA2	COVID-19 induced	Up_in_Control
7.56806e-06	-1.93346	0.022	0.093	0.270127	CCBE1	COVID-19 induced	Up_in_Control
3.32942e-06	-1.9322	0.061	0.15	0.118837	ATF6B	COVID-19 induced	Up_in_Control
7.27532e-08	-1.93164	0.071	0.18	0.00259678	CNOT3	COVID-19 induced	Up_in_Control
0.000868421	-1.92891	0.035	0.089	1	POLR3D	COVID-19 induced	Up_in_Control
6.72697e-15	-1.9288	0.128	0.316	2.40106e-10	USPL1	COVID-19 induced	Up_in_Control
3.29122e-05	-1.92729	0.013	0.068	1	AC078778.1	COVID-19 induced	Up_in_Control
0.000286336	-1.92714	0.032	0.09	1	FBXL18	COVID-19 induced	Up_in_Control
3.27439e-07	-1.92678	0.022	0.104	0.0116873	AL591506.1	COVID-19 induced	Up_in_Control
0.000285826	-1.92638	0.016	0.066	1	AC018680.1	COVID-19 induced	Up_in_Control
6.10842e-07	-1.92581	0.032	0.119	0.0218028	EGLN3	COVID-19 induced	Up_in_Control
4.69116e-06	-1.92545	0.022	0.094	0.167442	CCDC88B	COVID-19 induced	Up_in_Control
2.67492e-05	-1.92544	0.022	0.087	0.95476	AF064858.1	COVID-19 induced	Up_in_Control
1.09574e-05	-1.92479	0.042	0.122	0.391102	AL136456.1	COVID-19 induced	Up_in_Control
2.87824e-10	-1.92321	0.09	0.233	1.02733e-05	CHAF1A	COVID-19 induced	Up_in_Control
0.000958714	-1.92234	0.016	0.06	1	PIP4K2C	COVID-19 induced	Up_in_Control
3.44387e-12	-1.92116	0.115	0.283	1.22922e-07	SF3B2	COVID-19 induced	Up_in_Control
2.97433e-14	-1.92113	0.115	0.3	1.06163e-09	ZBTB11	COVID-19 induced	Up_in_Control
0.000910514	-1.91819	0.026	0.076	1	EFHD1	COVID-19 induced	Up_in_Control
3.87682e-22	-1.91769	0.167	0.417	1.38375e-17	AP3D1	COVID-19 induced	Up_in_Control
0.00205575	-1.91762	0.026	0.073	1	BX255925.3	COVID-19 induced	Up_in_Control
6.91228e-35	-1.91543	0.288	0.588	2.4672e-30	BDP1	COVID-19 induced	Up_in_Control
1.0357e-05	-1.91476	0.064	0.14	0.369672	RNF20	COVID-19 induced	Up_in_Control
0.00573393	-1.91411	0.029	0.068	1	HRH1	COVID-19 induced	Up_in_Control
3.88446e-06	-1.91392	0.061	0.146	0.138648	ZNF808	COVID-19 induced	Up_in_Control
0.011886	-1.91127	0.038	0.07	1	CEACAM20	COVID-19 induced	Up_in_Control
0.000937299	-1.91006	0.029	0.08	1	CACNA1H	COVID-19 induced	Up_in_Control
2.24956e-09	-1.90997	0.035	0.148	8.02935e-05	EVC2	COVID-19 induced	Up_in_Control
0.00853333	-1.9084	0.026	0.061	1	MYBL2	COVID-19 induced	Up_in_Control
0.0319019	-1.90694	0.026	0.053	1	OBSCN	COVID-19 induced	Up_in_Control
0.00029368	-1.90062	0.026	0.081	1	TET1	COVID-19 induced	Up_in_Control
9.83753e-05	-1.89816	0.038	0.104	1	KLC2	COVID-19 induced	Up_in_Control
0.000587836	-1.89715	0.026	0.077	1	DDX11	COVID-19 induced	Up_in_Control
7.47471e-08	-1.89686	0.064	0.176	0.00266795	UTP20	COVID-19 induced	Up_in_Control
0.000905533	-1.89551	0.029	0.081	1	VAV2	COVID-19 induced	Up_in_Control
0.000213701	-1.89533	0.022	0.078	1	LINC00578	COVID-19 induced	Up_in_Control
1.07847e-09	-1.89516	0.013	0.101	3.84938e-05	AC008403.3	COVID-19 induced	Up_in_Control
0.000653751	-1.8898	0.032	0.086	1	KTN1-AS1	COVID-19 induced	Up_in_Control
0.000846526	-1.88964	0.045	0.101	1	ARFGAP1	COVID-19 induced	Up_in_Control
5.76478e-06	-1.8887	0.026	0.099	0.205762	AC111006.1	COVID-19 induced	Up_in_Control
1.42766e-08	-1.88745	0.064	0.185	0.000509573	GPN3	COVID-19 induced	Up_in_Control
4.40663e-11	-1.88701	0.048	0.185	1.57286e-06	KNOP1	COVID-19 induced	Up_in_Control
1.94422e-13	-1.88682	0.135	0.307	6.93952e-09	DNASE1	COVID-19 induced	Up_in_Control
0.013657	-1.88439	0.048	0.071	1	NSMCE1-DT	COVID-19 induced	Up_in_Control
2.5591e-06	-1.88375	0.019	0.09	0.091342	TBCE	COVID-19 induced	Up_in_Control
4.81496e-07	-1.88296	0.061	0.162	0.017186	SFMBT2	COVID-19 induced	Up_in_Control
0.00397815	-1.88175	0.035	0.08	1	KCNQ3	COVID-19 induced	Up_in_Control
0.000719362	-1.88122	0.013	0.056	1	ZNF70	COVID-19 induced	Up_in_Control
1.62531e-07	-1.88073	0.013	0.086	0.00580123	SLC7A6OS	COVID-19 induced	Up_in_Control
0.000260448	-1.88065	0.035	0.097	1	FERMT3	COVID-19 induced	Up_in_Control
0.0580043	-1.88021	0.026	0.051	1	SYNJ2	COVID-19 induced	Up_in_Control
4.94373e-05	-1.87733	0.067	0.143	1	C19orf38	COVID-19 induced	Up_in_Control
4.37959e-16	-1.87594	0.189	0.393	1.56321e-11	DNAJC21	COVID-19 induced	Up_in_Control
2.41227e-05	-1.87371	0.029	0.098	0.861013	U91319.1	COVID-19 induced	Up_in_Control
1.5649e-09	-1.87244	0.071	0.195	5.5856e-05	RAB4B	COVID-19 induced	Up_in_Control
1.75138e-05	-1.87134	0.064	0.143	0.62512	TCHP	COVID-19 induced	Up_in_Control
0.000173037	-1.87037	0.045	0.113	1	SLC35E1	COVID-19 induced	Up_in_Control
0.0328002	-1.87024	0.026	0.055	1	GCC1	COVID-19 induced	Up_in_Control
3.57896e-11	-1.87016	0.074	0.225	1.27744e-06	KLHDC4	COVID-19 induced	Up_in_Control
0.00165655	-1.86929	0.022	0.068	1	GPC3	COVID-19 induced	Up_in_Control
5.70461e-05	-1.86692	0.016	0.072	1	PAUPAR	COVID-19 induced	Up_in_Control
0.0156456	-1.86684	0.026	0.058	1	AP001977.1	COVID-19 induced	Up_in_Control
0.0149863	-1.8655	0.026	0.06	1	WDR72	COVID-19 induced	Up_in_Control
4.76928e-05	-1.86505	0.08	0.148	1	MAFA	COVID-19 induced	Up_in_Control
5.76059e-06	-1.86408	0.026	0.099	0.205613	GRTP1	COVID-19 induced	Up_in_Control
2.92887e-05	-1.86315	0.045	0.121	1	ZFP82	COVID-19 induced	Up_in_Control
5.06667e-06	-1.86307	0.051	0.134	0.180845	THSD7B	COVID-19 induced	Up_in_Control
0.00074759	-1.86262	0.022	0.072	1	IRAK2	COVID-19 induced	Up_in_Control
0.0254507	-1.8596	0.022	0.053	1	TNIP1	COVID-19 induced	Up_in_Control
4.80925e-15	-1.85678	0.071	0.255	1.71657e-10	RSL1D1	COVID-19 induced	Up_in_Control
0.00134034	-1.85466	0.013	0.053	1	MFSD2B	COVID-19 induced	Up_in_Control
0.000208136	-1.85405	0.045	0.108	1	PIP4K2B	COVID-19 induced	Up_in_Control
2.91845e-10	-1.85329	0.019	0.122	1.04168e-05	LINC02731	COVID-19 induced	Up_in_Control
1.62498e-10	-1.85305	0.109	0.258	5.80004e-06	ABCF1	COVID-19 induced	Up_in_Control
0.000112519	-1.85099	0.035	0.1	1	ZMYND19	COVID-19 induced	Up_in_Control
1.14635e-43	-1.85051	0.394	0.666	4.09168e-39	SON	COVID-19 induced	Up_in_Control
0.00090302	-1.84291	0.016	0.061	1	PTPRR	COVID-19 induced	Up_in_Control
0.000120278	-1.84239	0.045	0.115	1	NFATC1	COVID-19 induced	Up_in_Control
2.62515e-05	-1.84228	0.048	0.127	0.936993	KCNB2	COVID-19 induced	Up_in_Control
2.95699e-05	-1.84077	0.01	0.06	1	AC009060.1	COVID-19 induced	Up_in_Control
0.000711711	-1.84039	0.026	0.075	1	WASHC2C	COVID-19 induced	Up_in_Control
0.031679	-1.839	0.035	0.067	1	AC104461.1	COVID-19 induced	Up_in_Control
5.10963e-06	-1.83874	0.058	0.148	0.182378	GZF1	COVID-19 induced	Up_in_Control
5.23845e-06	-1.83822	0.019	0.087	0.186976	EIF1AD	COVID-19 induced	Up_in_Control
1.53859e-09	-1.83809	0.054	0.18	5.4917e-05	CEP250	COVID-19 induced	Up_in_Control
0.0172594	-1.83793	0.019	0.052	1	BX276092.9	COVID-19 induced	Up_in_Control
0.000177728	-1.83723	0.051	0.118	1	POLR3A	COVID-19 induced	Up_in_Control
1.4327e-12	-1.8367	0.096	0.265	5.11374e-08	GOLGA3	COVID-19 induced	Up_in_Control
0.0038287	-1.83564	0.022	0.062	1	ABCA7	COVID-19 induced	Up_in_Control
1.30035e-10	-1.83474	0.093	0.244	4.64134e-06	ZC3H18	COVID-19 induced	Up_in_Control
0.00433661	-1.83442	0.016	0.053	1	ARHGEF40	COVID-19 induced	Up_in_Control
0.00399024	-1.83417	0.022	0.064	1	TRMT1	COVID-19 induced	Up_in_Control
1.82464e-08	-1.83014	0.08	0.201	0.000651268	YEATS2	COVID-19 induced	Up_in_Control
0.0019004	-1.82996	0.016	0.057	1	POLR1E	COVID-19 induced	Up_in_Control
0.000184973	-1.82957	0.013	0.06	1	SVOP	COVID-19 induced	Up_in_Control
4.08214e-08	-1.82888	0.109	0.211	0.00145704	SLX4	COVID-19 induced	Up_in_Control
8.23565e-17	-1.82813	0.103	0.313	2.93955e-12	NOL8	COVID-19 induced	Up_in_Control
1.20307e-06	-1.82723	0.029	0.112	0.0429412	PUS7	COVID-19 induced	Up_in_Control
6.17201e-11	-1.82109	0.112	0.258	2.20298e-06	ERICH1	COVID-19 induced	Up_in_Control
4.88276e-20	-1.81825	0.199	0.439	1.7428e-15	ZC3H13	COVID-19 induced	Up_in_Control
0.000890029	-1.81743	0.029	0.082	1	TAFA1	COVID-19 induced	Up_in_Control
6.81169e-19	-1.81631	0.163	0.39	2.43129e-14	KMT2A	COVID-19 induced	Up_in_Control
4.45393e-09	-1.81555	0.138	0.262	0.000158974	C12orf65	COVID-19 induced	Up_in_Control
0.000208364	-1.81345	0.032	0.094	1	THAP1	COVID-19 induced	Up_in_Control
1.84876e-18	-1.81317	0.212	0.428	6.59877e-14	DNMT1	COVID-19 induced	Up_in_Control
0.0235146	-1.81305	0.029	0.061	1	LINC02223	COVID-19 induced	Up_in_Control
0.000156011	-1.81283	0.029	0.09	1	EPHB2	COVID-19 induced	Up_in_Control
0.00747524	-1.81259	0.026	0.066	1	AC068688.1	COVID-19 induced	Up_in_Control
0.0377901	-1.812	0.038	0.063	1	KIAA0513	COVID-19 induced	Up_in_Control
2.89795e-05	-1.81071	0.016	0.075	1	AL136114.1	COVID-19 induced	Up_in_Control
0.000712924	-1.80958	0.067	0.123	1	DUS2	COVID-19 induced	Up_in_Control
0.000488551	-1.80838	0.022	0.074	1	RRP1	COVID-19 induced	Up_in_Control
0.0209572	-1.80745	0.019	0.05	1	AC007100.1	COVID-19 induced	Up_in_Control
1.13749e-25	-1.80632	0.231	0.513	4.06003e-21	NCL	COVID-19 induced	Up_in_Control
0.00841581	-1.80554	0.035	0.071	1	AL139106.1	COVID-19 induced	Up_in_Control
2.86944e-06	-1.80546	0.048	0.138	0.102419	PIEZO2	COVID-19 induced	Up_in_Control
0.0100002	-1.80485	0.035	0.076	1	ERN1	COVID-19 induced	Up_in_Control
0.00093908	-1.80466	0.029	0.081	1	ZFP1	COVID-19 induced	Up_in_Control
0.000548236	-1.80442	0.042	0.097	1	ZNF558	COVID-19 induced	Up_in_Control
3.08761e-10	-1.80073	0.112	0.263	1.10206e-05	NMT1	COVID-19 induced	Up_in_Control
3.2489e-06	-1.79831	0.042	0.127	0.115963	EYA2	COVID-19 induced	Up_in_Control
0.000336521	-1.79754	0.016	0.065	1	AL772284.2	COVID-19 induced	Up_in_Control
0.00217334	-1.79623	0.029	0.077	1	VAT1L	COVID-19 induced	Up_in_Control
0.00604785	-1.79515	0.019	0.057	1	SLC8A1-AS1	COVID-19 induced	Up_in_Control
7.80374e-07	-1.79436	0.048	0.144	0.0278539	DNTTIP2	COVID-19 induced	Up_in_Control
0.00290432	-1.7929	0.08	0.144	1	WDR74	COVID-19 induced	Up_in_Control
8.14161e-08	-1.79023	0.077	0.191	0.00290599	USF3	COVID-19 induced	Up_in_Control
2.38793e-07	-1.78752	0.032	0.124	0.00852325	C5AR1	COVID-19 induced	Up_in_Control
0.000165361	-1.78666	0.022	0.079	1	VSIG10	COVID-19 induced	Up_in_Control
4.13792e-16	-1.78607	0.125	0.333	1.47695e-11	PDCD7	COVID-19 induced	Up_in_Control
2.48489e-06	-1.78599	0.042	0.13	0.0886931	UNC5D	COVID-19 induced	Up_in_Control
1.00524e-09	-1.78432	0.125	0.263	3.58799e-05	CHD7	COVID-19 induced	Up_in_Control
1.1735e-05	-1.78423	0.058	0.143	0.418857	LINC01588	COVID-19 induced	Up_in_Control
0.00324308	-1.78368	0.035	0.082	1	POLN	COVID-19 induced	Up_in_Control
0.000876141	-1.78034	0.019	0.066	1	CABLES1	COVID-19 induced	Up_in_Control
8.39784e-10	-1.78016	0.08	0.222	2.99744e-05	TUBGCP2	COVID-19 induced	Up_in_Control
0.00265319	-1.78012	0.035	0.084	1	TRPM1	COVID-19 induced	Up_in_Control
3.46982e-05	-1.77934	0.035	0.106	1	Z96074.1	COVID-19 induced	Up_in_Control
4.42032e-20	-1.77877	0.192	0.426	1.57774e-15	PRR14L	COVID-19 induced	Up_in_Control
0.000315307	-1.77804	0.048	0.113	1	SLC35F2	COVID-19 induced	Up_in_Control
0.000540706	-1.77771	0.026	0.079	1	OLFM2	COVID-19 induced	Up_in_Control
0.000959176	-1.77712	0.022	0.071	1	IQGAP3	COVID-19 induced	Up_in_Control
1.73641e-23	-1.77342	0.218	0.485	6.19778e-19	DDX46	COVID-19 induced	Up_in_Control
5.46061e-16	-1.77145	0.141	0.348	1.94906e-11	RAD50	COVID-19 induced	Up_in_Control
3.03443e-07	-1.77145	0.061	0.166	0.0108308	LINC00862	COVID-19 induced	Up_in_Control
0.0404866	-1.77142	0.032	0.061	1	GIPC2	COVID-19 induced	Up_in_Control
0.00136723	-1.77062	0.026	0.075	1	ZNF221	COVID-19 induced	Up_in_Control
3.26964e-06	-1.76805	0.042	0.128	0.116703	POLR1C	COVID-19 induced	Up_in_Control
6.29978e-26	-1.76643	0.218	0.497	2.24858e-21	TRIP11	COVID-19 induced	Up_in_Control
0.000202334	-1.7646	0.022	0.078	1	GRIK1	COVID-19 induced	Up_in_Control
1.467e-08	-1.76282	0.038	0.146	0.000523615	ZFAND2A	COVID-19 induced	Up_in_Control
6.72281e-10	-1.76177	0.067	0.204	2.39957e-05	ETF1	COVID-19 induced	Up_in_Control
0.0699878	-1.76028	0.029	0.05	1	PCAT7	COVID-19 induced	Up_in_Control
3.878e-08	-1.75873	0.067	0.184	0.00138417	RFLNA	COVID-19 induced	Up_in_Control
0.0941844	-1.75846	0.035	0.055	1	LSM11	COVID-19 induced	Up_in_Control
0.000893537	-1.75756	0.022	0.072	1	PPM1H	COVID-19 induced	Up_in_Control
1.342e-27	-1.75658	0.218	0.486	4.79002e-23	IWS1	COVID-19 induced	Up_in_Control
2.18374e-24	-1.75501	0.301	0.532	7.79443e-20	CNTRL	COVID-19 induced	Up_in_Control
0.00341908	-1.75468	0.026	0.07	1	LINC02306	COVID-19 induced	Up_in_Control
1.12421e-24	-1.7546	0.256	0.513	4.01266e-20	SRRM1	COVID-19 induced	Up_in_Control
1.31082e-08	-1.74689	0.074	0.2	0.000467872	KIAA1671	COVID-19 induced	Up_in_Control
9.72669e-08	-1.74607	0.099	0.213	0.00347175	NPAT	COVID-19 induced	Up_in_Control
8.58852e-39	-1.74463	0.346	0.596	3.0655e-34	RIF1	COVID-19 induced	Up_in_Control
0.00458791	-1.74271	0.019	0.058	1	NEXMIF	COVID-19 induced	Up_in_Control
0.0420545	-1.74144	0.026	0.054	1	NCLN	COVID-19 induced	Up_in_Control
5.03804e-18	-1.74127	0.224	0.424	1.79823e-13	KDM3A	COVID-19 induced	Up_in_Control
5.06805e-05	-1.73986	0.051	0.128	1	GEMIN5	COVID-19 induced	Up_in_Control
0.0029153	-1.73921	0.038	0.09	1	ID2	COVID-19 induced	Up_in_Control
3.8962e-17	-1.73857	0.151	0.373	1.39067e-12	EIF2S2	COVID-19 induced	Up_in_Control
5.81341e-11	-1.73745	0.051	0.189	2.07498e-06	NOLC1	COVID-19 induced	Up_in_Control
0.00398269	-1.73652	0.022	0.064	1	KIF20A	COVID-19 induced	Up_in_Control
3.40468e-09	-1.7361	0.122	0.251	0.000121523	PLK2	COVID-19 induced	Up_in_Control
0.0235973	-1.73312	0.022	0.053	1	ZPLD1	COVID-19 induced	Up_in_Control
1.35258e-08	-1.73278	0.042	0.152	0.000482775	RBM19	COVID-19 induced	Up_in_Control
3.62194e-09	-1.72937	0.061	0.187	0.000129278	ABR	COVID-19 induced	Up_in_Control
0.00806169	-1.72798	0.038	0.073	1	CHAF1B	COVID-19 induced	Up_in_Control
9.56745e-16	-1.72746	0.103	0.308	3.41491e-11	PRAME	COVID-19 induced	Up_in_Control
0.00999698	-1.72734	0.026	0.064	1	CDH8	COVID-19 induced	Up_in_Control
0.00143118	-1.72721	0.019	0.064	1	ADCY1	COVID-19 induced	Up_in_Control
1.14895e-05	-1.72455	0.051	0.135	0.410094	GCNT1	COVID-19 induced	Up_in_Control
3.35316e-06	-1.72217	0.061	0.157	0.119685	ZNF814	COVID-19 induced	Up_in_Control
1.65373e-25	-1.72032	0.311	0.551	5.90266e-21	ZNF318	COVID-19 induced	Up_in_Control
4.58505e-09	-1.7192	0.032	0.138	0.000163654	ZNF830	COVID-19 induced	Up_in_Control
4.7019e-11	-1.719	0.167	0.319	1.67825e-06	AC118758.3	COVID-19 induced	Up_in_Control
0.00394342	-1.7178	0.022	0.064	1	CELF4	COVID-19 induced	Up_in_Control
3.20977e-05	-1.7133	0.045	0.121	1	PLCD4	COVID-19 induced	Up_in_Control
7.58613e-18	-1.71253	0.205	0.408	2.70772e-13	KIF20B	COVID-19 induced	Up_in_Control
1.56625e-20	-1.71135	0.215	0.446	5.5904e-16	ARID4A	COVID-19 induced	Up_in_Control
0.00398611	-1.71067	0.058	0.089	1	ANKRD20A4	COVID-19 induced	Up_in_Control
0.00717137	-1.70658	0.029	0.071	1	UTP3	COVID-19 induced	Up_in_Control
3.57971e-19	-1.70578	0.298	0.531	1.27771e-14	RBBP6	COVID-19 induced	Up_in_Control
1.48813e-10	-1.70232	0.131	0.279	5.31159e-06	DNAH10	COVID-19 induced	Up_in_Control
3.25505e-14	-1.7021	0.138	0.33	1.16182e-09	CASP8AP2	COVID-19 induced	Up_in_Control
5.68702e-05	-1.70104	0.064	0.142	1	CACNG8	COVID-19 induced	Up_in_Control
1.4134e-32	-1.6996	0.372	0.656	5.04486e-28	ANKRD11	COVID-19 induced	Up_in_Control
0.000797479	-1.699	0.013	0.055	1	TCHH	COVID-19 induced	Up_in_Control
2.02574e-05	-1.69863	0.026	0.094	0.723048	SATB1	COVID-19 induced	Up_in_Control
4.04536e-08	-1.69769	0.071	0.187	0.00144391	LSG1	COVID-19 induced	Up_in_Control
0.0126227	-1.69463	0.045	0.08	1	HEXD	COVID-19 induced	Up_in_Control
0.000380047	-1.69268	0.08	0.131	1	CCDC77	COVID-19 induced	Up_in_Control
3.14057e-05	-1.69028	0.022	0.086	1	FLT3	COVID-19 induced	Up_in_Control
0.0102445	-1.6894	0.022	0.06	1	ZNF761	COVID-19 induced	Up_in_Control
0.00328182	-1.68926	0.038	0.087	1	PLXNA4	COVID-19 induced	Up_in_Control
0.000771064	-1.68862	0.019	0.067	1	HUNK	COVID-19 induced	Up_in_Control
4.6659e-07	-1.68811	0.112	0.202	0.016654	OR3A2	COVID-19 induced	Up_in_Control
0.000470795	-1.68775	0.038	0.1	1	AC099489.1	COVID-19 induced	Up_in_Control
2.7231e-05	-1.68701	0.045	0.123	0.971957	GABPB1	COVID-19 induced	Up_in_Control
2.58342e-05	-1.68599	0.064	0.148	0.9221	ZNF528	COVID-19 induced	Up_in_Control
2.38418e-08	-1.68411	0.077	0.201	0.000850985	MOB4	COVID-19 induced	Up_in_Control
4.33294e-15	-1.68391	0.179	0.381	1.54656e-10	ANKLE2	COVID-19 induced	Up_in_Control
0.0119416	-1.68361	0.032	0.071	1	AC008543.1	COVID-19 induced	Up_in_Control
4.57288e-08	-1.6823	0.067	0.185	0.0016322	CPEB1-AS1	COVID-19 induced	Up_in_Control
0.0391854	-1.68109	0.035	0.066	1	CGN	COVID-19 induced	Up_in_Control
0.00577899	-1.68017	0.019	0.057	1	FUT11	COVID-19 induced	Up_in_Control
5.33749e-06	-1.6784	0.042	0.126	0.190511	FTSJ3	COVID-19 induced	Up_in_Control
4.84862e-07	-1.67593	0.09	0.2	0.0173062	PHF21B	COVID-19 induced	Up_in_Control
0.0354597	-1.67577	0.026	0.056	1	FAM207A	COVID-19 induced	Up_in_Control
2.11904e-08	-1.67452	0.09	0.21	0.000756347	TOP3A	COVID-19 induced	Up_in_Control
2.2205e-23	-1.67288	0.288	0.543	7.92562e-19	LINC00486	COVID-19 induced	Up_in_Control
7.43176e-10	-1.66937	0.048	0.174	2.65262e-05	RGS2	COVID-19 induced	Up_in_Control
2.0493e-07	-1.66805	0.071	0.181	0.00731455	ZHX1	COVID-19 induced	Up_in_Control
2.21259e-06	-1.66551	0.067	0.166	0.0789739	ABCE1	COVID-19 induced	Up_in_Control
9.24881e-06	-1.66446	0.038	0.119	0.330118	KYAT1	COVID-19 induced	Up_in_Control
6.45715e-05	-1.66425	0.038	0.109	1	AC027288.3	COVID-19 induced	Up_in_Control
0.00321454	-1.66205	0.035	0.079	1	OTX2-AS1	COVID-19 induced	Up_in_Control
4.8481e-11	-1.66191	0.096	0.254	1.73043e-06	UBE4A	COVID-19 induced	Up_in_Control
0.000255919	-1.65834	0.029	0.088	1	ST6GAL1	COVID-19 induced	Up_in_Control
0.000323998	-1.65809	0.029	0.087	1	MACROD1	COVID-19 induced	Up_in_Control
0.00239836	-1.65793	0.026	0.072	1	IL5RA	COVID-19 induced	Up_in_Control
2.41324e-06	-1.65677	0.077	0.176	0.0861359	CEP104	COVID-19 induced	Up_in_Control
9.63921e-10	-1.65607	0.074	0.211	3.44052e-05	DEAF1	COVID-19 induced	Up_in_Control
0.0440583	-1.65403	0.035	0.067	1	DBN1	COVID-19 induced	Up_in_Control
2.56309e-14	-1.6535	0.151	0.344	9.14844e-10	SFSWAP	COVID-19 induced	Up_in_Control
0.0173702	-1.65332	0.029	0.063	1	PRDM16	COVID-19 induced	Up_in_Control
3.89673e-09	-1.65264	0.09	0.227	0.000139086	UBE2I	COVID-19 induced	Up_in_Control
8.25122e-16	-1.65177	0.202	0.418	2.94511e-11	RRBP1	COVID-19 induced	Up_in_Control
6.32582e-05	-1.65059	0.035	0.105	1	RASGEF1B	COVID-19 induced	Up_in_Control
0.0046811	-1.64949	0.022	0.063	1	CA10	COVID-19 induced	Up_in_Control
3.19829e-05	-1.64831	0.006	0.05	1	SPSB1	COVID-19 induced	Up_in_Control
1.92804e-05	-1.64813	0.08	0.163	0.688175	SHANK2	COVID-19 induced	Up_in_Control
2.34826e-07	-1.64648	0.087	0.193	0.00838163	HAUS3	COVID-19 induced	Up_in_Control
0.0028418	-1.64521	0.022	0.066	1	AC124947.1	COVID-19 induced	Up_in_Control
0.0249047	-1.64393	0.042	0.072	1	ELMOD3	COVID-19 induced	Up_in_Control
0.000511752	-1.64362	0.035	0.094	1	WDR4	COVID-19 induced	Up_in_Control
3.88541e-07	-1.643	0.304	0.366	0.0138682	AKAP12	COVID-19 induced	Up_in_Control
0.000376354	-1.64273	0.029	0.085	1	CHST12	COVID-19 induced	Up_in_Control
0.00185552	-1.64231	0.048	0.089	1	CFAP74	COVID-19 induced	Up_in_Control
1.59319e-06	-1.64144	0.016	0.085	0.0568659	RARB	COVID-19 induced	Up_in_Control
0.0041829	-1.64136	0.038	0.088	1	AGMAT	COVID-19 induced	Up_in_Control
0.000271926	-1.64049	0.051	0.117	1	AC090809.1	COVID-19 induced	Up_in_Control
4.83504e-07	-1.63981	0.026	0.109	0.0172577	PALB2	COVID-19 induced	Up_in_Control
1.38537e-05	-1.63904	0.016	0.076	0.49448	ZNF324	COVID-19 induced	Up_in_Control
1.84671e-06	-1.63869	0.09	0.191	0.0659146	MED1	COVID-19 induced	Up_in_Control
0.00251238	-1.63854	0.022	0.067	1	TTL	COVID-19 induced	Up_in_Control
1.54294e-14	-1.63829	0.141	0.344	5.5072e-10	PRPF4B	COVID-19 induced	Up_in_Control
3.97817e-05	-1.63804	0.061	0.138	1	PALM2-AKAP2	COVID-19 induced	Up_in_Control
7.14988e-11	-1.63654	0.122	0.283	2.55201e-06	NUSAP1	COVID-19 induced	Up_in_Control
4.04863e-12	-1.63628	0.08	0.244	1.44508e-07	CCDC47	COVID-19 induced	Up_in_Control
3.31181e-05	-1.63457	0.022	0.086	1	CENPL	COVID-19 induced	Up_in_Control
8.64369e-11	-1.63353	0.167	0.31	3.08519e-06	MYH10	COVID-19 induced	Up_in_Control
0.00238965	-1.63097	0.016	0.056	1	AC096719.1	COVID-19 induced	Up_in_Control
0.0032182	-1.62858	0.029	0.073	1	SLC24A4	COVID-19 induced	Up_in_Control
0.000736613	-1.62793	0.042	0.102	1	LTV1	COVID-19 induced	Up_in_Control
0.00128287	-1.62761	0.038	0.092	1	LUZP2	COVID-19 induced	Up_in_Control
0.0121879	-1.6259	0.042	0.082	1	L3MBTL2	COVID-19 induced	Up_in_Control
0.0207132	-1.62535	0.019	0.051	1	GRIA1	COVID-19 induced	Up_in_Control
0.0018924	-1.62524	0.035	0.087	1	GTF2H2	COVID-19 induced	Up_in_Control
1.09676e-21	-1.62165	0.202	0.468	3.91465e-17	ARHGAP21	COVID-19 induced	Up_in_Control
1.64128e-05	-1.62078	0.038	0.116	0.585821	CFAP97D2	COVID-19 induced	Up_in_Control
0.00775949	-1.61789	0.022	0.057	1	ADAMTS18	COVID-19 induced	Up_in_Control
0.00710583	-1.61732	0.016	0.051	1	ARHGEF6	COVID-19 induced	Up_in_Control
2.69897e-05	-1.61554	0.125	0.168	0.963342	DNAH17	COVID-19 induced	Up_in_Control
3.93341e-05	-1.61522	0.051	0.128	1	TMEM241	COVID-19 induced	Up_in_Control
6.3779e-09	-1.61504	0.103	0.235	0.000227646	NSA2	COVID-19 induced	Up_in_Control
0.00595605	-1.6121	0.029	0.072	1	AC023509.6	COVID-19 induced	Up_in_Control
2.99424e-10	-1.61031	0.093	0.243	1.06873e-05	ZNFX1	COVID-19 induced	Up_in_Control
0.0446098	-1.6095	0.029	0.057	1	AMPH	COVID-19 induced	Up_in_Control
3.04166e-10	-1.60905	0.077	0.221	1.08566e-05	ZNF445	COVID-19 induced	Up_in_Control
6.82744e-07	-1.60838	0.08	0.19	0.0243692	GJC1	COVID-19 induced	Up_in_Control
3.40501e-07	-1.6081	0.051	0.154	0.0121535	RAP1GAP2	COVID-19 induced	Up_in_Control
3.98824e-12	-1.60797	0.163	0.319	1.42352e-07	BNIP3L	COVID-19 induced	Up_in_Control
1.50669e-08	-1.60718	0.093	0.216	0.000537782	CARS	COVID-19 induced	Up_in_Control
5.55432e-19	-1.60657	0.228	0.451	1.9825e-14	EP400	COVID-19 induced	Up_in_Control
2.16245e-05	-1.60614	0.048	0.128	0.771843	NLRP2	COVID-19 induced	Up_in_Control
7.41793e-06	-1.60602	0.08	0.173	0.264768	MCM4	COVID-19 induced	Up_in_Control
4.17066e-13	-1.60344	0.157	0.347	1.48863e-08	SRRT	COVID-19 induced	Up_in_Control
0.226563	-1.60308	0.035	0.052	1	RDH13	COVID-19 induced	Up_in_Control
0.000211421	-1.60134	0.026	0.083	1	OBI1-AS1	COVID-19 induced	Up_in_Control
1.32756e-09	-1.60092	0.103	0.252	4.73846e-05	MARF1	COVID-19 induced	Up_in_Control
9.44553e-09	-1.60062	0.08	0.212	0.000337139	GTPBP4	COVID-19 induced	Up_in_Control
9.0286e-17	-1.60058	0.224	0.404	3.22258e-12	PTGES3	COVID-19 induced	Up_in_Control
0.000118442	-1.59809	0.042	0.112	1	RTEL1	COVID-19 induced	Up_in_Control
1.78621e-16	-1.59781	0.138	0.353	6.37552e-12	SAFB2	COVID-19 induced	Up_in_Control
5.12244e-08	-1.59716	0.157	0.281	0.00182835	POTEI	COVID-19 induced	Up_in_Control
7.397e-13	-1.59552	0.154	0.331	2.64021e-08	MBOAT2	COVID-19 induced	Up_in_Control
2.66884e-15	-1.59543	0.17	0.385	9.52589e-11	CNTNAP2	COVID-19 induced	Up_in_Control
0.0036274	-1.59336	0.029	0.074	1	GLT1D1	COVID-19 induced	Up_in_Control
0.00708705	-1.59295	0.026	0.066	1	SVOPL	COVID-19 induced	Up_in_Control
1.1331e-05	-1.59277	0.074	0.165	0.404437	MAPKAPK5	COVID-19 induced	Up_in_Control
4.02343e-05	-1.59243	0.08	0.164	1	NEB	COVID-19 induced	Up_in_Control
0.00917859	-1.59153	0.019	0.055	1	LAMC3	COVID-19 induced	Up_in_Control
2.15043e-11	-1.59046	0.058	0.203	7.67553e-07	ZNF8	COVID-19 induced	Up_in_Control
0.0219797	-1.59001	0.019	0.05	1	IPCEF1	COVID-19 induced	Up_in_Control
0.00692486	-1.58789	0.032	0.076	1	AC231533.1	COVID-19 induced	Up_in_Control
0.0229268	-1.58742	0.035	0.069	1	ZNF454	COVID-19 induced	Up_in_Control
2.75815e-07	-1.58599	0.103	0.222	0.00984466	PRPF3	COVID-19 induced	Up_in_Control
0.00019828	-1.58538	0.058	0.13	1	SMYD4	COVID-19 induced	Up_in_Control
8.16849e-10	-1.5851	0.404	0.534	2.91558e-05	ANKRD36	COVID-19 induced	Up_in_Control
0.00602892	-1.58452	0.029	0.071	1	INCENP	COVID-19 induced	Up_in_Control
1.9264e-06	-1.58424	0.071	0.173	0.0687589	NRDE2	COVID-19 induced	Up_in_Control
0.000982891	-1.58422	0.016	0.06	1	INPP5D	COVID-19 induced	Up_in_Control
0.0287662	-1.58404	0.026	0.056	1	CCDC85A	COVID-19 induced	Up_in_Control
0.000187979	-1.5831	0.013	0.06	1	GABRB1	COVID-19 induced	Up_in_Control
2.80105e-05	-1.58104	0.096	0.163	0.999779	KRI1	COVID-19 induced	Up_in_Control
0.0012739	-1.58027	0.022	0.07	1	BACE2	COVID-19 induced	Up_in_Control
1.4461e-23	-1.57978	0.295	0.539	5.16155e-19	HERC2	COVID-19 induced	Up_in_Control
0.00104689	-1.57974	0.054	0.114	1	BAG4	COVID-19 induced	Up_in_Control
5.78705e-07	-1.57927	0.112	0.223	0.0206557	IGF2BP2	COVID-19 induced	Up_in_Control
0.0223048	-1.57764	0.026	0.058	1	RSPH6A	COVID-19 induced	Up_in_Control
0.0271025	-1.57664	0.035	0.069	1	BMP6	COVID-19 induced	Up_in_Control
1.27753e-06	-1.5766	0.067	0.17	0.0455989	GNL2	COVID-19 induced	Up_in_Control
0.00269073	-1.57596	0.067	0.122	1	AC011476.3	COVID-19 induced	Up_in_Control
0.0297577	-1.57591	0.054	0.086	1	FAM83D	COVID-19 induced	Up_in_Control
0.00373535	-1.57549	0.029	0.075	1	CCZ1	COVID-19 induced	Up_in_Control
2.76282e-18	-1.5754	0.324	0.505	9.86132e-14	KIF5B	COVID-19 induced	Up_in_Control
0.00639962	-1.57502	0.016	0.051	1	HIST1H4H	COVID-19 induced	Up_in_Control
1.41725e-05	-1.57222	0.045	0.127	0.50586	APAF1	COVID-19 induced	Up_in_Control
9.12484e-20	-1.57199	0.308	0.541	3.25693e-15	DDX24	COVID-19 induced	Up_in_Control
0.00011733	-1.57195	0.074	0.153	1	DAPK3	COVID-19 induced	Up_in_Control
0.00809583	-1.56891	0.019	0.056	1	KIF3C	COVID-19 induced	Up_in_Control
0.000108725	-1.5687	0.019	0.073	1	SARM1	COVID-19 induced	Up_in_Control
7.69055e-34	-1.56867	0.385	0.648	2.74499e-29	PNISR	COVID-19 induced	Up_in_Control
0.0037919	-1.56649	0.019	0.059	1	COPG1	COVID-19 induced	Up_in_Control
2.74639e-16	-1.5663	0.154	0.377	9.80268e-12	MORC3	COVID-19 induced	Up_in_Control
1.77986e-05	-1.56542	0.045	0.126	0.635286	MIR3681HG	COVID-19 induced	Up_in_Control
0.066875	-1.56494	0.048	0.071	1	FUCA1	COVID-19 induced	Up_in_Control
4.63038e-12	-1.56411	0.144	0.32	1.65272e-07	PEG3	COVID-19 induced	Up_in_Control
0.0439168	-1.56394	0.026	0.056	1	ZNF17	COVID-19 induced	Up_in_Control
0.0120494	-1.56394	0.026	0.063	1	TIMM29	COVID-19 induced	Up_in_Control
6.94826e-10	-1.56367	0.099	0.248	2.48004e-05	DEK	COVID-19 induced	Up_in_Control
0.000256081	-1.56363	0.029	0.088	1	COLEC12	COVID-19 induced	Up_in_Control
0.00692926	-1.5633	0.019	0.057	1	GTF2IRD2	COVID-19 induced	Up_in_Control
2.13711e-10	-1.56319	0.167	0.317	7.62799e-06	CENPJ	COVID-19 induced	Up_in_Control
1.26552e-08	-1.56194	0.103	0.234	0.000451701	DHX8	COVID-19 induced	Up_in_Control
0.0358712	-1.56156	0.022	0.052	1	RGS20	COVID-19 induced	Up_in_Control
4.07057e-17	-1.56047	0.234	0.439	1.45291e-12	UBR4	COVID-19 induced	Up_in_Control
0.000768961	-1.5598	0.048	0.11	1	AL139260.1	COVID-19 induced	Up_in_Control
0.000123038	-1.55609	0.074	0.15	1	CCDC26	COVID-19 induced	Up_in_Control
6.84293e-19	-1.55528	0.215	0.425	2.44245e-14	PWWP3A	COVID-19 induced	Up_in_Control
0.0846107	-1.55495	0.032	0.058	1	AC025160.1	COVID-19 induced	Up_in_Control
1.37215e-12	-1.55285	0.067	0.229	4.89761e-08	CCT8	COVID-19 induced	Up_in_Control
0.00419208	-1.55275	0.022	0.064	1	PCDH11X	COVID-19 induced	Up_in_Control
6.71729e-05	-1.55252	0.022	0.081	1	CAMK2G	COVID-19 induced	Up_in_Control
0.002544	-1.55226	0.032	0.081	1	COL4A2	COVID-19 induced	Up_in_Control
0.000227122	-1.55223	0.029	0.088	1	AL683813.1	COVID-19 induced	Up_in_Control
0.00366999	-1.55175	0.042	0.091	1	TRMU	COVID-19 induced	Up_in_Control
0.00112019	-1.54721	0.042	0.097	1	AC016766.1	COVID-19 induced	Up_in_Control
0.0467266	-1.54718	0.026	0.055	1	RASEF	COVID-19 induced	Up_in_Control
0.0273256	-1.54647	0.038	0.073	1	N4BP2L1	COVID-19 induced	Up_in_Control
0.00274312	-1.54578	0.067	0.123	1	ZKSCAN2	COVID-19 induced	Up_in_Control
0.000308919	-1.54338	0.071	0.138	1	GARS	COVID-19 induced	Up_in_Control
0.000773182	-1.54255	0.019	0.067	1	AC079298.3	COVID-19 induced	Up_in_Control
0.0109887	-1.54183	0.019	0.054	1	ATP13A2	COVID-19 induced	Up_in_Control
5.91006e-08	-1.54137	0.093	0.215	0.00210948	RALBP1	COVID-19 induced	Up_in_Control
5.81372e-32	-1.54076	0.401	0.666	2.07509e-27	BPTF	COVID-19 induced	Up_in_Control
0.0131713	-1.54035	0.038	0.075	1	GCH1	COVID-19 induced	Up_in_Control
0.000154545	-1.53893	0.064	0.137	1	MLLT1	COVID-19 induced	Up_in_Control
0.000473795	-1.53774	0.032	0.09	1	OGG1	COVID-19 induced	Up_in_Control
9.11073e-27	-1.53734	0.311	0.567	3.25189e-22	SBNO1	COVID-19 induced	Up_in_Control
9.30099e-06	-1.53529	0.09	0.189	0.33198	LZIC	COVID-19 induced	Up_in_Control
0.000675749	-1.5343	0.026	0.078	1	KCNH1	COVID-19 induced	Up_in_Control
3.17343e-35	-1.53238	0.522	0.754	1.13269e-30	PCM1	COVID-19 induced	Up_in_Control
3.20834e-10	-1.53102	0.141	0.294	1.14515e-05	POR	COVID-19 induced	Up_in_Control
0.00379338	-1.52887	0.035	0.084	1	APOLD1	COVID-19 induced	Up_in_Control
0.0062936	-1.52819	0.061	0.109	1	MED29	COVID-19 induced	Up_in_Control
2.07119e-18	-1.52793	0.244	0.456	7.39269e-14	CHD4	COVID-19 induced	Up_in_Control
0.00174666	-1.52722	0.013	0.051	1	MRM2	COVID-19 induced	Up_in_Control
0.02487	-1.52574	0.022	0.053	1	APBB1IP	COVID-19 induced	Up_in_Control
1.61638e-18	-1.52445	0.26	0.482	5.76934e-14	BRD4	COVID-19 induced	Up_in_Control
1.1391e-11	-1.52363	0.311	0.472	4.06579e-07	AC026495.2	COVID-19 induced	Up_in_Control
1.85462e-09	-1.52281	0.144	0.29	6.61971e-05	MACO1	COVID-19 induced	Up_in_Control
0.00438415	-1.52276	0.026	0.069	1	TSHZ3	COVID-19 induced	Up_in_Control
0.00340276	-1.52245	0.022	0.065	1	CASZ1	COVID-19 induced	Up_in_Control
9.1597e-19	-1.51926	0.247	0.475	3.26937e-14	AKAP9	COVID-19 induced	Up_in_Control
7.59357e-12	-1.51881	0.196	0.368	2.71037e-07	BRD7	COVID-19 induced	Up_in_Control
0.00015938	-1.51862	0.022	0.079	1	CT47B1	COVID-19 induced	Up_in_Control
9.58012e-05	-1.51818	0.016	0.069	1	AL109840.2	COVID-19 induced	Up_in_Control
3.98615e-06	-1.51726	0.147	0.251	0.142278	CCDC34	COVID-19 induced	Up_in_Control
0.000153278	-1.51724	0.029	0.09	1	ERBB3	COVID-19 induced	Up_in_Control
1.39559e-05	-1.51657	0.122	0.204	0.498129	AL731769.2	COVID-19 induced	Up_in_Control
2.7916e-08	-1.5163	0.151	0.27	0.000996406	ASPM	COVID-19 induced	Up_in_Control
2.7429e-05	-1.5143	0.054	0.137	0.979024	POLDIP3	COVID-19 induced	Up_in_Control
7.17671e-08	-1.5136	0.099	0.224	0.00256158	MCM8	COVID-19 induced	Up_in_Control
0.00269402	-1.51124	0.022	0.066	1	PECAM1	COVID-19 induced	Up_in_Control
1.73637e-15	-1.5111	0.228	0.431	6.19761e-11	PNN	COVID-19 induced	Up_in_Control
1.35388e-12	-1.51045	0.125	0.307	4.8324e-08	TAF7	COVID-19 induced	Up_in_Control
9.52088e-05	-1.5104	0.042	0.113	1	NOS1	COVID-19 induced	Up_in_Control
2.52642e-06	-1.51039	0.09	0.187	0.0901756	TAF12	COVID-19 induced	Up_in_Control
1.75829e-14	-1.50991	0.208	0.403	6.27588e-10	KNTC1	COVID-19 induced	Up_in_Control
5.0623e-11	-1.50888	0.122	0.29	1.80689e-06	CEBPZ	COVID-19 induced	Up_in_Control
3.93119e-13	-1.50772	0.179	0.354	1.40316e-08	CTR9	COVID-19 induced	Up_in_Control
0.011096	-1.50717	0.026	0.064	1	GNA14	COVID-19 induced	Up_in_Control
4.44089e-06	-1.50639	0.026	0.099	0.158509	GBA	COVID-19 induced	Up_in_Control
0.0716118	-1.50602	0.051	0.076	1	IKBIP	COVID-19 induced	Up_in_Control
0.00563326	-1.50561	0.016	0.052	1	FAM160B2	COVID-19 induced	Up_in_Control
9.13627e-11	-1.5041	0.183	0.354	3.26101e-06	WASHC1	COVID-19 induced	Up_in_Control
1.0516e-09	-1.504	0.135	0.29	3.75347e-05	TSC2	COVID-19 induced	Up_in_Control
0.00766901	-1.5025	0.032	0.075	1	FGD5	COVID-19 induced	Up_in_Control
0.00189426	-1.50175	0.042	0.097	1	GABBR2	COVID-19 induced	Up_in_Control
1.80768e-35	-1.50174	0.551	0.792	6.45216e-31	SETX	COVID-19 induced	Up_in_Control
1.11269e-11	-1.50158	0.16	0.335	3.97151e-07	KLC1	COVID-19 induced	Up_in_Control
4.53844e-06	-1.49929	0.074	0.173	0.161991	RASSF3	COVID-19 induced	Up_in_Control
0.00752754	-1.49912	0.032	0.075	1	EIF2B2	COVID-19 induced	Up_in_Control
0.000321593	-1.49902	0.026	0.081	1	PNO1	COVID-19 induced	Up_in_Control
0.0870787	-1.499	0.029	0.054	1	AC010884.1	COVID-19 induced	Up_in_Control
0.00875783	-1.49896	0.051	0.099	1	THOC5	COVID-19 induced	Up_in_Control
0.0136772	-1.49886	0.019	0.05	1	ZSCAN20	COVID-19 induced	Up_in_Control
0.0861629	-1.49856	0.038	0.066	1	FIGNL1	COVID-19 induced	Up_in_Control
1.5401e-06	-1.49836	0.09	0.197	0.0549709	HNRNPUL2	COVID-19 induced	Up_in_Control
4.11721e-05	-1.49831	0.029	0.096	1	CMTM8	COVID-19 induced	Up_in_Control
1.10859e-09	-1.49701	0.106	0.256	3.95689e-05	PSMD7	COVID-19 induced	Up_in_Control
2.64601e-11	-1.49354	0.16	0.332	9.44441e-07	TAF1D	COVID-19 induced	Up_in_Control
9.64178e-07	-1.49048	0.083	0.195	0.0344144	MORC4	COVID-19 induced	Up_in_Control
0.0055342	-1.49041	0.038	0.086	1	EFR3B	COVID-19 induced	Up_in_Control
0.000347363	-1.48964	0.042	0.105	1	SYTL3	COVID-19 induced	Up_in_Control
0.00579318	-1.48808	0.045	0.092	1	AC063977.6	COVID-19 induced	Up_in_Control
0.00251821	-1.48571	0.051	0.108	1	AQP4-AS1	COVID-19 induced	Up_in_Control
0.00160626	-1.48523	0.045	0.097	1	AC027097.2	COVID-19 induced	Up_in_Control
0.102516	-1.48334	0.038	0.057	1	ACER1	COVID-19 induced	Up_in_Control
0.0641297	-1.48308	0.026	0.053	1	CYFIP2	COVID-19 induced	Up_in_Control
0.00670885	-1.48291	0.054	0.099	1	GGA3	COVID-19 induced	Up_in_Control
8.49694e-14	-1.48198	0.157	0.355	3.03281e-09	FOXK2	COVID-19 induced	Up_in_Control
0.0653173	-1.4817	0.048	0.076	1	KCNAB2	COVID-19 induced	Up_in_Control
0.016127	-1.48078	0.045	0.086	1	HINFP	COVID-19 induced	Up_in_Control
8.9664e-05	-1.47918	0.016	0.071	1	AL136115.2	COVID-19 induced	Up_in_Control
6.70936e-06	-1.47826	0.141	0.237	0.239477	OPCML	COVID-19 induced	Up_in_Control
8.576e-05	-1.4782	0.054	0.13	1	NUP85	COVID-19 induced	Up_in_Control
0.00010144	-1.47541	0.045	0.116	1	SNHG29	COVID-19 induced	Up_in_Control
5.10556e-07	-1.47461	0.061	0.166	0.0182233	IGF2BP1	COVID-19 induced	Up_in_Control
0.00138498	-1.47449	0.042	0.099	1	HDAC5	COVID-19 induced	Up_in_Control
0.000251137	-1.47201	0.051	0.121	1	NELFCD	COVID-19 induced	Up_in_Control
3.20052e-16	-1.47187	0.212	0.425	1.14236e-11	SF3B1	COVID-19 induced	Up_in_Control
0.0012857	-1.47074	0.08	0.14	1	ZGPAT	COVID-19 induced	Up_in_Control
2.44139e-07	-1.4703	0.122	0.23	0.00871406	POU2F2	COVID-19 induced	Up_in_Control
0.0824942	-1.46701	0.103	0.12	1	LINC01409	COVID-19 induced	Up_in_Control
0.0205166	-1.46594	0.035	0.072	1	ZNF79	COVID-19 induced	Up_in_Control
6.84349e-10	-1.46531	0.109	0.262	2.44265e-05	TTF1	COVID-19 induced	Up_in_Control
0.000281301	-1.46527	0.013	0.059	1	AC012184.4	COVID-19 induced	Up_in_Control
1.35343e-05	-1.46502	0.026	0.092	0.483078	BEND4	COVID-19 induced	Up_in_Control
3.95016e-08	-1.46486	0.135	0.263	0.00140993	METTL6	COVID-19 induced	Up_in_Control
0.00406581	-1.46456	0.042	0.091	1	WNT5B	COVID-19 induced	Up_in_Control
2.51166e-14	-1.46417	0.151	0.35	8.96486e-10	NSD3	COVID-19 induced	Up_in_Control
0.000182394	-1.46202	0.035	0.1	1	KCNQ5	COVID-19 induced	Up_in_Control
0.000724549	-1.46189	0.035	0.093	1	AL160314.2	COVID-19 induced	Up_in_Control
0.0401713	-1.4615	0.029	0.061	1	ZNF724	COVID-19 induced	Up_in_Control
0.0117202	-1.4614	0.035	0.076	1	STRIP1	COVID-19 induced	Up_in_Control
0.0118512	-1.4607	0.019	0.054	1	LINC01358	COVID-19 induced	Up_in_Control
9.7183e-06	-1.4605	0.029	0.101	0.346875	NIN	COVID-19 induced	Up_in_Control
1.42854e-07	-1.45877	0.179	0.305	0.0050989	IK	COVID-19 induced	Up_in_Control
0.0105708	-1.45817	0.029	0.069	1	AC005394.1	COVID-19 induced	Up_in_Control
0.055517	-1.45718	0.026	0.054	1	TECPR1	COVID-19 induced	Up_in_Control
9.66998e-07	-1.45675	0.045	0.138	0.0345151	KSR2	COVID-19 induced	Up_in_Control
3.4411e-20	-1.45574	0.314	0.541	1.22823e-15	UPF2	COVID-19 induced	Up_in_Control
0.0891823	-1.4557	0.045	0.053	1	AC245187.2	COVID-19 induced	Up_in_Control
7.95792e-13	-1.45556	0.221	0.368	2.84042e-08	ZNF544	COVID-19 induced	Up_in_Control
0.00890228	-1.45434	0.048	0.091	1	AC025887.2	COVID-19 induced	Up_in_Control
4.19737e-05	-1.45262	0.071	0.157	1	MADD	COVID-19 induced	Up_in_Control
3.27764e-05	-1.45198	0.087	0.177	1	MAEA	COVID-19 induced	Up_in_Control
0.00460875	-1.4505	0.022	0.064	1	SLC25A20	COVID-19 induced	Up_in_Control
1.1514e-05	-1.44949	0.032	0.107	0.410967	MCM6	COVID-19 induced	Up_in_Control
4.95041e-25	-1.44865	0.298	0.559	1.76695e-20	KDM5A	COVID-19 induced	Up_in_Control
2.1141e-05	-1.44713	0.054	0.139	0.754587	CCNG2	COVID-19 induced	Up_in_Control
0.00159832	-1.44669	0.022	0.068	1	SLC13A3	COVID-19 induced	Up_in_Control
0.00449246	-1.44414	0.038	0.086	1	MUC20	COVID-19 induced	Up_in_Control
0.000229085	-1.44296	0.029	0.088	1	AC112206.2	COVID-19 induced	Up_in_Control
1.22295e-08	-1.44289	0.064	0.187	0.000436507	PDAP1	COVID-19 induced	Up_in_Control
0.0152712	-1.44233	0.042	0.083	1	LYSMD4	COVID-19 induced	Up_in_Control
3.58718e-07	-1.44194	0.128	0.243	0.0128037	CENPE	COVID-19 induced	Up_in_Control
0.0421951	-1.43966	0.064	0.094	1	XRCC2	COVID-19 induced	Up_in_Control
0.0521924	-1.439	0.061	0.083	1	AC036108.1	COVID-19 induced	Up_in_Control
0.00814543	-1.43859	0.035	0.079	1	SGK2	COVID-19 induced	Up_in_Control
4.2115e-05	-1.43778	0.042	0.115	1	RELN	COVID-19 induced	Up_in_Control
0.000887917	-1.43776	0.045	0.106	1	ARHGAP44	COVID-19 induced	Up_in_Control
0.00088135	-1.43746	0.019	0.065	1	AL138733.1	COVID-19 induced	Up_in_Control
0.000572785	-1.43726	0.09	0.155	1	MSH5	COVID-19 induced	Up_in_Control
1.0876e-06	-1.43645	0.048	0.143	0.0388197	CRNKL1	COVID-19 induced	Up_in_Control
2.90408e-09	-1.43621	0.109	0.249	0.000103655	ARMH4	COVID-19 induced	Up_in_Control
1.12314e-16	-1.4362	0.353	0.568	4.00883e-12	WDR60	COVID-19 induced	Up_in_Control
1.23631e-05	-1.43605	0.093	0.19	0.441276	COG4	COVID-19 induced	Up_in_Control
5.83822e-05	-1.43573	0.163	0.223	1	LYAR	COVID-19 induced	Up_in_Control
5.63118e-11	-1.43516	0.147	0.311	2.00994e-06	CWF19L2	COVID-19 induced	Up_in_Control
1.17901e-05	-1.43514	0.013	0.068	0.420826	ATP6V0A4	COVID-19 induced	Up_in_Control
0.000737282	-1.43344	0.013	0.055	1	DDX49	COVID-19 induced	Up_in_Control
8.43857e-06	-1.43309	0.08	0.175	0.301198	ZNF713	COVID-19 induced	Up_in_Control
2.08063e-05	-1.43222	0.016	0.074	0.74264	ALG11	COVID-19 induced	Up_in_Control
0.0421681	-1.4299	0.026	0.056	1	C12orf45	COVID-19 induced	Up_in_Control
0.00712623	-1.42951	0.051	0.093	1	DCLK2	COVID-19 induced	Up_in_Control
1.14859e-05	-1.4288	0.112	0.204	0.409968	RAB40C	COVID-19 induced	Up_in_Control
0.00386287	-1.42655	0.035	0.082	1	AC084816.1	COVID-19 induced	Up_in_Control
1.28679e-25	-1.42529	0.41	0.637	4.59292e-21	NKTR	COVID-19 induced	Up_in_Control
3.46597e-13	-1.42495	0.17	0.356	1.23711e-08	HSPA4	COVID-19 induced	Up_in_Control
0.000114779	-1.42414	0.061	0.14	1	Z93930.2	COVID-19 induced	Up_in_Control
7.14485e-06	-1.42388	0.074	0.172	0.255021	DDX27	COVID-19 induced	Up_in_Control
0.00819717	-1.42358	0.026	0.066	1	COL21A1	COVID-19 induced	Up_in_Control
8.00835e-07	-1.42281	0.013	0.074	0.0285842	AL591368.1	COVID-19 induced	Up_in_Control
4.34605e-11	-1.42278	0.119	0.285	1.55124e-06	HSPA9	COVID-19 induced	Up_in_Control
0.0734335	-1.42245	0.038	0.069	1	EXOSC8	COVID-19 induced	Up_in_Control
0.0313914	-1.42217	0.054	0.088	1	SLC43A2	COVID-19 induced	Up_in_Control
0.00273579	-1.42137	0.029	0.076	1	DNAJB12	COVID-19 induced	Up_in_Control
2.09253e-05	-1.42119	0.038	0.115	0.746885	MYH14	COVID-19 induced	Up_in_Control
0.000694378	-1.42061	0.035	0.092	1	KIF4A	COVID-19 induced	Up_in_Control
1.28311e-05	-1.42058	0.042	0.122	0.457981	SAP30BP	COVID-19 induced	Up_in_Control
3.01531e-09	-1.4204	0.179	0.323	0.000107625	BRD1	COVID-19 induced	Up_in_Control
1.45564e-18	-1.41841	0.308	0.5	5.19561e-14	TTC3	COVID-19 induced	Up_in_Control
4.69267e-06	-1.41736	0.035	0.115	0.167496	FRMD4B	COVID-19 induced	Up_in_Control
2.09648e-17	-1.41669	0.272	0.508	7.48298e-13	MYT1L	COVID-19 induced	Up_in_Control
0.0511403	-1.4161	0.029	0.058	1	RND3	COVID-19 induced	Up_in_Control
1.29536e-07	-1.41466	0.026	0.108	0.00462353	SHISA9	COVID-19 induced	Up_in_Control
2.85906e-06	-1.41444	0.087	0.192	0.102048	ARCN1	COVID-19 induced	Up_in_Control
9.29145e-08	-1.41414	0.087	0.209	0.0033164	PTPRS	COVID-19 induced	Up_in_Control
4.60322e-10	-1.41395	0.141	0.3	1.64303e-05	AP2A2	COVID-19 induced	Up_in_Control
0.152068	-1.41389	0.045	0.066	1	UHRF1	COVID-19 induced	Up_in_Control
0.00257568	-1.41344	0.019	0.06	1	ACOT11	COVID-19 induced	Up_in_Control
0.0110178	-1.41335	0.054	0.098	1	KLHL29	COVID-19 induced	Up_in_Control
4.82496e-09	-1.41067	0.083	0.219	0.000172217	EIF3L	COVID-19 induced	Up_in_Control
4.66026e-05	-1.41043	0.048	0.126	1	MFN2	COVID-19 induced	Up_in_Control
4.70164e-08	-1.40982	0.035	0.134	0.00167816	JMJD6	COVID-19 induced	Up_in_Control
1.9037e-05	-1.40907	0.096	0.192	0.679486	ANP32B	COVID-19 induced	Up_in_Control
2.8682e-07	-1.40865	0.106	0.226	0.0102375	KIF11	COVID-19 induced	Up_in_Control
0.0171242	-1.40796	0.032	0.068	1	RBMS2	COVID-19 induced	Up_in_Control
0.000119739	-1.40785	0.074	0.153	1	BFAR	COVID-19 induced	Up_in_Control
1.02288e-05	-1.40763	0.051	0.138	0.365097	EAPP	COVID-19 induced	Up_in_Control
0.000404289	-1.40672	0.054	0.123	1	KDM5C	COVID-19 induced	Up_in_Control
0.00136255	-1.40604	0.048	0.107	1	CASTOR2	COVID-19 induced	Up_in_Control
0.0930933	-1.40573	0.029	0.054	1	PLEKHM1	COVID-19 induced	Up_in_Control
0.018954	-1.40426	0.042	0.076	1	AC004951.1	COVID-19 induced	Up_in_Control
0.045317	-1.40307	0.042	0.074	1	GINS2	COVID-19 induced	Up_in_Control
0.000314002	-1.40267	0.022	0.076	1	C8orf34	COVID-19 induced	Up_in_Control
0.203644	-1.40232	0.032	0.052	1	ARHGAP22	COVID-19 induced	Up_in_Control
1.53297e-15	-1.4021	0.272	0.469	5.47163e-11	PRKDC	COVID-19 induced	Up_in_Control
1.59903e-05	-1.40209	0.154	0.253	0.570743	CCDC62	COVID-19 induced	Up_in_Control
7.16008e-06	-1.40113	0.019	0.083	0.255565	COQ3	COVID-19 induced	Up_in_Control
0.000999885	-1.39859	0.019	0.063	1	SYT12	COVID-19 induced	Up_in_Control
9.91559e-06	-1.39823	0.08	0.179	0.353917	NELFE	COVID-19 induced	Up_in_Control
0.0325254	-1.39582	0.026	0.058	1	DUSP5	COVID-19 induced	Up_in_Control
2.92289e-06	-1.39447	0.119	0.231	0.104327	STXBP1	COVID-19 induced	Up_in_Control
0.0244311	-1.39432	0.032	0.067	1	VWF	COVID-19 induced	Up_in_Control
0.00137645	-1.39406	0.013	0.052	1	KLB	COVID-19 induced	Up_in_Control
0.00114608	-1.39351	0.022	0.069	1	MEIS3	COVID-19 induced	Up_in_Control
4.17179e-06	-1.39335	0.099	0.203	0.148904	LINC00334	COVID-19 induced	Up_in_Control
0.00301902	-1.39294	0.077	0.136	1	AL031073.2	COVID-19 induced	Up_in_Control
3.62113e-07	-1.39259	0.035	0.127	0.0129249	HCG17	COVID-19 induced	Up_in_Control
1.75568e-07	-1.39114	0.109	0.237	0.00626655	CDH13	COVID-19 induced	Up_in_Control
0.0315994	-1.39107	0.022	0.053	1	TNR	COVID-19 induced	Up_in_Control
0.00243695	-1.3907	0.09	0.156	1	ZNF217	COVID-19 induced	Up_in_Control
2.07409e-05	-1.39014	0.083	0.174	0.740306	SYNGAP1	COVID-19 induced	Up_in_Control
0.000260679	-1.38969	0.077	0.152	1	AC006994.2	COVID-19 induced	Up_in_Control
2.44531e-06	-1.38911	0.045	0.135	0.0872803	CUX2	COVID-19 induced	Up_in_Control
0.129358	-1.38883	0.042	0.052	1	AL139815.1	COVID-19 induced	Up_in_Control
0.0323751	-1.38866	0.032	0.066	1	AC104574.2	COVID-19 induced	Up_in_Control
3.95326e-06	-1.38782	0.08	0.182	0.141104	FAT1	COVID-19 induced	Up_in_Control
0.0828863	-1.3875	0.064	0.081	1	PCDH10	COVID-19 induced	Up_in_Control
1.42974e-06	-1.38672	0.042	0.131	0.0510316	SF3A1	COVID-19 induced	Up_in_Control
0.00128784	-1.38636	0.022	0.069	1	NPSR1-AS1	COVID-19 induced	Up_in_Control
0.000377611	-1.3858	0.061	0.132	1	ANKRD27	COVID-19 induced	Up_in_Control
0.0552243	-1.38431	0.022	0.05	1	CLNK	COVID-19 induced	Up_in_Control
0.0901643	-1.3817	0.029	0.055	1	AC010894.3	COVID-19 induced	Up_in_Control
1.02896e-06	-1.37905	0.128	0.244	0.0367267	TUT7	COVID-19 induced	Up_in_Control
1.74132e-12	-1.3785	0.218	0.39	6.2153e-08	TRA2B	COVID-19 induced	Up_in_Control
0.00253064	-1.37843	0.064	0.123	1	ITGAE	COVID-19 induced	Up_in_Control
0.0259138	-1.37789	0.058	0.095	1	NR2E3	COVID-19 induced	Up_in_Control
1.44383e-06	-1.37708	0.138	0.252	0.0515346	STAG3	COVID-19 induced	Up_in_Control
2.20564e-10	-1.37592	0.221	0.359	7.8726e-06	ECPAS	COVID-19 induced	Up_in_Control
0.000504919	-1.37357	0.029	0.083	1	NWD1	COVID-19 induced	Up_in_Control
0.0817432	-1.37352	0.032	0.057	1	ABCB6	COVID-19 induced	Up_in_Control
0.0718832	-1.37222	0.026	0.053	1	AC114316.1	COVID-19 induced	Up_in_Control
3.89912e-05	-1.37216	0.276	0.358	1	POTEC	COVID-19 induced	Up_in_Control
7.04363e-09	-1.37058	0.09	0.226	0.000251408	DNAJC5	COVID-19 induced	Up_in_Control
0.000150737	-1.37043	0.141	0.198	1	HYOU1	COVID-19 induced	Up_in_Control
0.00296557	-1.37041	0.019	0.06	1	ADGRE3	COVID-19 induced	Up_in_Control
0.0010142	-1.37038	0.038	0.096	1	AC079781.5	COVID-19 induced	Up_in_Control
3.62438e-12	-1.37014	0.083	0.25	1.29365e-07	CACYBP	COVID-19 induced	Up_in_Control
1.01706e-11	-1.36998	0.128	0.304	3.63019e-07	DHRSX	COVID-19 induced	Up_in_Control
0.00199247	-1.36801	0.019	0.062	1	PLPP7	COVID-19 induced	Up_in_Control
0.00696726	-1.36783	0.029	0.071	1	AC007368.1	COVID-19 induced	Up_in_Control
0.182677	-1.36782	0.032	0.052	1	EPHX4	COVID-19 induced	Up_in_Control
0.00119902	-1.36766	0.038	0.095	1	WWC1	COVID-19 induced	Up_in_Control
6.76118e-28	-1.36715	0.503	0.775	2.41327e-23	CCDC144A	COVID-19 induced	Up_in_Control
1.79186e-07	-1.36645	0.135	0.254	0.00639568	RBL1	COVID-19 induced	Up_in_Control
0.0245311	-1.3662	0.026	0.06	1	GLB1	COVID-19 induced	Up_in_Control
1.60067e-06	-1.36586	0.112	0.228	0.0571328	PRC1	COVID-19 induced	Up_in_Control
1.36862e-08	-1.3657	0.135	0.278	0.000488502	CAMK1D	COVID-19 induced	Up_in_Control
0.203119	-1.3656	0.032	0.05	1	KHDC1	COVID-19 induced	Up_in_Control
0.000977651	-1.3652	0.019	0.066	1	CPB2-AS1	COVID-19 induced	Up_in_Control
4.02005e-05	-1.36491	0.022	0.083	1	AC010624.1	COVID-19 induced	Up_in_Control
8.06709e-15	-1.3643	0.228	0.41	2.87939e-10	SECISBP2	COVID-19 induced	Up_in_Control
5.77755e-10	-1.36427	0.228	0.377	2.06218e-05	BRCA2	COVID-19 induced	Up_in_Control
8.40336e-09	-1.36356	0.042	0.151	0.000299941	ABAT	COVID-19 induced	Up_in_Control
0.0326873	-1.3628	0.051	0.088	1	OTOA	COVID-19 induced	Up_in_Control
2.44802e-06	-1.36272	0.067	0.168	0.0873774	ADAMTSL1	COVID-19 induced	Up_in_Control
1.80075e-12	-1.36256	0.266	0.438	6.42741e-08	AL117329.1	COVID-19 induced	Up_in_Control
4.02153e-11	-1.36161	0.131	0.303	1.4354e-06	TSPYL2	COVID-19 induced	Up_in_Control
0.0466878	-1.36052	0.058	0.058	1	AC024610.2	COVID-19 induced	Up_in_Control
1.43277e-05	-1.36011	0.022	0.09	0.511399	NTAN1	COVID-19 induced	Up_in_Control
2.34471e-18	-1.35939	0.343	0.57	8.36896e-14	RBM25	COVID-19 induced	Up_in_Control
0.000271651	-1.3592	0.096	0.173	1	MPHOSPH10	COVID-19 induced	Up_in_Control
4.39585e-07	-1.35916	0.058	0.162	0.0156901	PDE4DIP	COVID-19 induced	Up_in_Control
0.0222151	-1.35849	0.022	0.055	1	HYPK	COVID-19 induced	Up_in_Control
0.00284939	-1.35846	0.022	0.066	1	ZNF534	COVID-19 induced	Up_in_Control
4.63305e-09	-1.35789	0.119	0.264	0.000165367	SNRNP200	COVID-19 induced	Up_in_Control
0.0131751	-1.35758	0.029	0.068	1	AC093916.1	COVID-19 induced	Up_in_Control
0.106603	-1.35495	0.058	0.08	1	KBTBD12	COVID-19 induced	Up_in_Control
7.49595e-07	-1.35278	0.176	0.293	0.0267553	TPX2	COVID-19 induced	Up_in_Control
2.4547e-05	-1.35231	0.09	0.182	0.876156	TGS1	COVID-19 induced	Up_in_Control
3.82615e-15	-1.35219	0.228	0.407	1.36567e-10	RSRC2	COVID-19 induced	Up_in_Control
6.9477e-07	-1.35158	0.119	0.241	0.0247984	RAD54L2	COVID-19 induced	Up_in_Control
9.46594e-05	-1.35138	0.051	0.127	1	PRPF39	COVID-19 induced	Up_in_Control
0.312163	-1.3513	0.035	0.052	1	UBE2D4	COVID-19 induced	Up_in_Control
0.175261	-1.35111	0.042	0.064	1	BIRC5	COVID-19 induced	Up_in_Control
0.0836863	-1.35056	0.026	0.05	1	ELOVL6	COVID-19 induced	Up_in_Control
0.000820353	-1.34945	0.051	0.115	1	DSN1	COVID-19 induced	Up_in_Control
7.71952e-08	-1.34897	0.16	0.279	0.00275533	KAT7	COVID-19 induced	Up_in_Control
0.00696146	-1.34781	0.019	0.056	1	AP001462.1	COVID-19 induced	Up_in_Control
0.000772149	-1.34756	0.026	0.077	1	AC109927.1	COVID-19 induced	Up_in_Control
3.69051e-06	-1.3473	0.083	0.188	0.131725	ITFG2	COVID-19 induced	Up_in_Control
0.00888286	-1.3473	0.051	0.099	1	DMAP1	COVID-19 induced	Up_in_Control
5.13674e-07	-1.34663	0.074	0.185	0.0183346	DDX55	COVID-19 induced	Up_in_Control
0.0160746	-1.34641	0.038	0.08	1	AC136431.1	COVID-19 induced	Up_in_Control
0.00130902	-1.3463	0.077	0.144	1	AC119403.1	COVID-19 induced	Up_in_Control
1.20938e-13	-1.34567	0.253	0.428	4.31665e-09	MAEL	COVID-19 induced	Up_in_Control
0.0217185	-1.34532	0.061	0.102	1	AL139383.1	COVID-19 induced	Up_in_Control
0.000819323	-1.34321	0.054	0.119	1	RAB43	COVID-19 induced	Up_in_Control
2.16351e-13	-1.34265	0.221	0.418	7.7222e-09	EIF3A	COVID-19 induced	Up_in_Control
0.000119604	-1.34247	0.077	0.159	1	MKNK2	COVID-19 induced	Up_in_Control
0.0329507	-1.34236	0.026	0.058	1	ANAPC2	COVID-19 induced	Up_in_Control
7.61127e-05	-1.34148	0.135	0.226	1	HMMR	COVID-19 induced	Up_in_Control
0.0868608	-1.3413	0.026	0.052	1	LINC02136	COVID-19 induced	Up_in_Control
3.40823e-13	-1.34067	0.212	0.415	1.2165e-08	SMARCA5	COVID-19 induced	Up_in_Control
0.000363084	-1.34043	0.067	0.141	1	SGCD	COVID-19 induced	Up_in_Control
0.000129829	-1.3394	0.08	0.165	1	AP005482.1	COVID-19 induced	Up_in_Control
0.0246914	-1.33845	0.026	0.059	1	LINC02542	COVID-19 induced	Up_in_Control
0.0441893	-1.33782	0.026	0.055	1	SFXN1	COVID-19 induced	Up_in_Control
1.56479e-21	-1.33735	0.478	0.677	5.58519e-17	KTN1	COVID-19 induced	Up_in_Control
3.32779e-09	-1.33587	0.16	0.307	0.000118779	DDX21	COVID-19 induced	Up_in_Control
4.56899e-05	-1.33585	0.099	0.19	1	ERRFI1	COVID-19 induced	Up_in_Control
2.30777e-05	-1.33513	0.016	0.073	0.823713	RBM15B	COVID-19 induced	Up_in_Control
0.0504122	-1.33454	0.026	0.055	1	RELA	COVID-19 induced	Up_in_Control
0.00044871	-1.33336	0.045	0.11	1	PROSER2-AS1	COVID-19 induced	Up_in_Control
0.128391	-1.33331	0.029	0.053	1	IL31RA	COVID-19 induced	Up_in_Control
7.16139e-05	-1.33311	0.115	0.199	1	HDGFL2	COVID-19 induced	Up_in_Control
0.044525	-1.33292	0.022	0.051	1	LINC01949	COVID-19 induced	Up_in_Control
6.08557e-11	-1.33253	0.157	0.329	2.17212e-06	CACNA1A	COVID-19 induced	Up_in_Control
0.10742	-1.3323	0.035	0.058	1	AC093912.1	COVID-19 induced	Up_in_Control
0.00931123	-1.33227	0.022	0.06	1	EHBP1L1	COVID-19 induced	Up_in_Control
0.0649628	-1.33196	0.032	0.062	1	PRDM15	COVID-19 induced	Up_in_Control
0.0647642	-1.33195	0.064	0.095	1	MFSD12	COVID-19 induced	Up_in_Control
3.70396e-05	-1.33182	0.087	0.171	1	ZNF471	COVID-19 induced	Up_in_Control
5.45551e-08	-1.3316	0.064	0.181	0.00194724	RRP15	COVID-19 induced	Up_in_Control
0.000635449	-1.33137	0.026	0.076	1	PAK5	COVID-19 induced	Up_in_Control
4.78858e-06	-1.33117	0.125	0.222	0.170919	TDRD1	COVID-19 induced	Up_in_Control
0.00256907	-1.33041	0.032	0.082	1	CAD	COVID-19 induced	Up_in_Control
0.156184	-1.33012	0.042	0.067	1	ABCB8	COVID-19 induced	Up_in_Control
1.35752e-05	-1.32937	0.071	0.164	0.484539	AC092835.1	COVID-19 induced	Up_in_Control
0.0041173	-1.32915	0.051	0.104	1	LIG3	COVID-19 induced	Up_in_Control
0.00962143	-1.32857	0.032	0.074	1	AC093655.1	COVID-19 induced	Up_in_Control
2.02644e-05	-1.32732	0.026	0.093	0.723295	MANBA	COVID-19 induced	Up_in_Control
0.00212692	-1.32692	0.106	0.15	1	JHY	COVID-19 induced	Up_in_Control
2.46886e-07	-1.32672	0.042	0.138	0.00881211	ZNF776	COVID-19 induced	Up_in_Control
0.0597488	-1.32661	0.058	0.087	1	RASGEF1C	COVID-19 induced	Up_in_Control
0.000122444	-1.3266	0.048	0.121	1	PRUNE2	COVID-19 induced	Up_in_Control
1.8793e-09	-1.32612	0.087	0.229	6.70779e-05	EIF4G1	COVID-19 induced	Up_in_Control
5.43275e-08	-1.32584	0.212	0.331	0.00193911	TEX15	COVID-19 induced	Up_in_Control
0.145059	-1.32541	0.035	0.058	1	ZNF610	COVID-19 induced	Up_in_Control
0.000232166	-1.32526	0.083	0.158	1	RNF212	COVID-19 induced	Up_in_Control
0.00449007	-1.32352	0.048	0.101	1	POFUT2	COVID-19 induced	Up_in_Control
0.0640959	-1.32324	0.064	0.079	1	PPP5D1	COVID-19 induced	Up_in_Control
0.00144069	-1.32293	0.013	0.052	1	GAL3ST1	COVID-19 induced	Up_in_Control
0.0303848	-1.32276	0.022	0.053	1	FEN1	COVID-19 induced	Up_in_Control
1.89151e-06	-1.32274	0.099	0.213	0.0675137	CLPTM1L	COVID-19 induced	Up_in_Control
4.75548e-15	-1.32264	0.343	0.522	1.69737e-10	HMGB1	COVID-19 induced	Up_in_Control
1.02749e-08	-1.32212	0.167	0.32	0.000366741	REST	COVID-19 induced	Up_in_Control
0.0312869	-1.32209	0.026	0.057	1	RHBDL3	COVID-19 induced	Up_in_Control
3.72274e-06	-1.32098	0.064	0.162	0.132876	SYF2	COVID-19 induced	Up_in_Control
2.29754e-12	-1.32054	0.08	0.247	8.20061e-08	SDAD1	COVID-19 induced	Up_in_Control
7.30388e-08	-1.32035	0.067	0.184	0.00260697	NR1D2	COVID-19 induced	Up_in_Control
1.64906e-17	-1.31968	0.228	0.454	5.886e-13	EIF5	COVID-19 induced	Up_in_Control
0.0322729	-1.31963	0.026	0.058	1	PSMD10	COVID-19 induced	Up_in_Control
0.00218912	-1.31868	0.058	0.116	1	TXLNG	COVID-19 induced	Up_in_Control
0.000536909	-1.31809	0.051	0.118	1	ZNF518B	COVID-19 induced	Up_in_Control
0.00010495	-1.31598	0.058	0.136	1	TSR1	COVID-19 induced	Up_in_Control
0.0369975	-1.31514	0.054	0.081	1	FAM151B	COVID-19 induced	Up_in_Control
4.58963e-19	-1.31499	0.353	0.563	1.63818e-14	NSD2	COVID-19 induced	Up_in_Control
1.57402e-07	-1.31401	0.096	0.219	0.00561815	GOSR2	COVID-19 induced	Up_in_Control
1.19417e-10	-1.31363	0.263	0.382	4.26236e-06	CCDC73	COVID-19 induced	Up_in_Control
0.097171	-1.3126	0.038	0.058	1	PRMT7	COVID-19 induced	Up_in_Control
0.000455783	-1.31197	0.051	0.118	1	HARS	COVID-19 induced	Up_in_Control
1.67432e-11	-1.31143	0.276	0.434	5.97616e-07	UBN1	COVID-19 induced	Up_in_Control
0.0289238	-1.3114	0.026	0.058	1	ZNF347	COVID-19 induced	Up_in_Control
0.0021687	-1.31124	0.09	0.147	1	COLQ	COVID-19 induced	Up_in_Control
0.00959787	-1.31083	0.019	0.055	1	RNASEH2C	COVID-19 induced	Up_in_Control
0.0115388	-1.31018	0.054	0.098	1	HOXB-AS1	COVID-19 induced	Up_in_Control
0.00380964	-1.30927	0.016	0.053	1	LINC01331	COVID-19 induced	Up_in_Control
1.06574e-08	-1.30912	0.125	0.27	0.000380393	TMPRSS9	COVID-19 induced	Up_in_Control
3.37285e-09	-1.30873	0.045	0.158	0.000120387	CLIP2	COVID-19 induced	Up_in_Control
0.000579946	-1.30858	0.048	0.112	1	DNAAF5	COVID-19 induced	Up_in_Control
5.42127e-28	-1.30752	0.506	0.702	1.93501e-23	MACF1	COVID-19 induced	Up_in_Control
0.0126788	-1.30741	0.045	0.088	1	AC068587.4	COVID-19 induced	Up_in_Control
0.0878021	-1.30696	0.045	0.073	1	EIF2AK4	COVID-19 induced	Up_in_Control
0.0485815	-1.30638	0.045	0.079	1	AAR2	COVID-19 induced	Up_in_Control
0.00616356	-1.30634	0.061	0.112	1	TADA2B	COVID-19 induced	Up_in_Control
6.47289e-08	-1.30604	0.154	0.286	0.00231037	ESF1	COVID-19 induced	Up_in_Control
0.106173	-1.30575	0.042	0.068	1	FAM71F2	COVID-19 induced	Up_in_Control
0.000946143	-1.30475	0.071	0.132	1	AC079447.1	COVID-19 induced	Up_in_Control
0.000576825	-1.30405	0.029	0.084	1	UCHL1	COVID-19 induced	Up_in_Control
0.000140838	-1.30228	0.112	0.195	1	TBC1D1	COVID-19 induced	Up_in_Control
0.000348151	-1.30197	0.179	0.199	1	SPA17	COVID-19 induced	Up_in_Control
1.30579e-08	-1.30183	0.167	0.314	0.000466077	GAK	COVID-19 induced	Up_in_Control
0.000927286	-1.3008	0.045	0.106	1	C1orf146	COVID-19 induced	Up_in_Control
0.0021053	-1.29826	0.045	0.101	1	MTA1	COVID-19 induced	Up_in_Control
0.00772677	-1.29809	0.058	0.104	1	PPFIBP2	COVID-19 induced	Up_in_Control
1.89287e-11	-1.29794	0.115	0.286	6.75621e-07	PER2	COVID-19 induced	Up_in_Control
0.0359924	-1.29753	0.038	0.069	1	MAPRE2	COVID-19 induced	Up_in_Control
0.000323089	-1.2975	0.058	0.129	1	NAV2	COVID-19 induced	Up_in_Control
0.00761833	-1.29743	0.08	0.137	1	CCNB3	COVID-19 induced	Up_in_Control
3.03395e-05	-1.29603	0.067	0.156	1	SMG5	COVID-19 induced	Up_in_Control
0.0900262	-1.29566	0.032	0.058	1	AP3M1	COVID-19 induced	Up_in_Control
0.00122395	-1.29483	0.026	0.075	1	KCNJ6	COVID-19 induced	Up_in_Control
0.0190737	-1.29301	0.038	0.079	1	DDRGK1	COVID-19 induced	Up_in_Control
0.0651812	-1.29289	0.029	0.058	1	AOAH	COVID-19 induced	Up_in_Control
0.00934523	-1.29272	0.061	0.107	1	CTDP1	COVID-19 induced	Up_in_Control
1.7574e-10	-1.2923	0.087	0.239	6.27269e-06	YTHDF2	COVID-19 induced	Up_in_Control
9.28653e-10	-1.29159	0.167	0.327	3.31464e-05	CBX3	COVID-19 induced	Up_in_Control
2.8506e-08	-1.29042	0.08	0.208	0.00101746	SLC4A1AP	COVID-19 induced	Up_in_Control
0.000200567	-1.2904	0.083	0.154	1	LARP7	COVID-19 induced	Up_in_Control
0.00453327	-1.28973	0.022	0.063	1	LLGL2	COVID-19 induced	Up_in_Control
0.000487447	-1.28893	0.09	0.165	1	SCN8A	COVID-19 induced	Up_in_Control
0.0152364	-1.28872	0.061	0.1	1	STK10	COVID-19 induced	Up_in_Control
0.00178821	-1.28809	0.019	0.062	1	TNFAIP3	COVID-19 induced	Up_in_Control
0.102948	-1.2877	0.048	0.076	1	AP4B1	COVID-19 induced	Up_in_Control
0.0123812	-1.28716	0.071	0.116	1	GMEB2	COVID-19 induced	Up_in_Control
1.0512e-05	-1.28702	0.112	0.216	0.375204	BUD31	COVID-19 induced	Up_in_Control
1.35264e-14	-1.28698	0.314	0.486	4.82796e-10	KNL1	COVID-19 induced	Up_in_Control
0.0337454	-1.28457	0.042	0.077	1	MCM3	COVID-19 induced	Up_in_Control
7.39853e-10	-1.28379	0.157	0.324	2.64076e-05	KAZN	COVID-19 induced	Up_in_Control
1.20303e-08	-1.28107	0.202	0.338	0.000429399	CCT3	COVID-19 induced	Up_in_Control
0.0497427	-1.28107	0.035	0.068	1	ANKRD52	COVID-19 induced	Up_in_Control
0.0266197	-1.2795	0.019	0.05	1	SPC25	COVID-19 induced	Up_in_Control
0.175401	-1.27926	0.042	0.052	1	LEO1	COVID-19 induced	Up_in_Control
0.192424	-1.27914	0.038	0.058	1	DCDC2C	COVID-19 induced	Up_in_Control
0.0232365	-1.27903	0.032	0.069	1	CETN2	COVID-19 induced	Up_in_Control
0.00218963	-1.27768	0.061	0.121	1	LINC02245	COVID-19 induced	Up_in_Control
0.000657636	-1.27715	0.103	0.173	1	RBMX	COVID-19 induced	Up_in_Control
0.000342468	-1.27534	0.122	0.125	1	ZMYND10	COVID-19 induced	Up_in_Control
1.45117e-10	-1.27468	0.019	0.116	5.17968e-06	FAM83E	COVID-19 induced	Up_in_Control
4.77486e-06	-1.2736	0.096	0.201	0.170429	SMC1A	COVID-19 induced	Up_in_Control
0.000110038	-1.27217	0.035	0.101	1	KRBA2	COVID-19 induced	Up_in_Control
1.12286e-05	-1.27202	0.099	0.197	0.400781	BAIAP2L1	COVID-19 induced	Up_in_Control
0.004025	-1.27188	0.042	0.093	1	RASGRF2	COVID-19 induced	Up_in_Control
1.97528e-07	-1.27136	0.08	0.199	0.00705036	AARS	COVID-19 induced	Up_in_Control
0.000219424	-1.27114	0.026	0.082	1	ZNF423	COVID-19 induced	Up_in_Control
7.90756e-10	-1.26999	0.167	0.333	2.82245e-05	CDC42BPB	COVID-19 induced	Up_in_Control
0.000130102	-1.26947	0.054	0.13	1	SCO1	COVID-19 induced	Up_in_Control
0.000176061	-1.26915	0.038	0.105	1	MTFR1L	COVID-19 induced	Up_in_Control
0.0571022	-1.26833	0.022	0.05	1	ZSCAN26	COVID-19 induced	Up_in_Control
1.78365e-07	-1.26766	0.141	0.273	0.00636639	WDR45B	COVID-19 induced	Up_in_Control
0.00698486	-1.26753	0.035	0.081	1	SNRPD3	COVID-19 induced	Up_in_Control
7.58214e-05	-1.26747	0.083	0.171	1	PPID	COVID-19 induced	Up_in_Control
4.67904e-12	-1.26649	0.247	0.428	1.67009e-07	ATRX	COVID-19 induced	Up_in_Control
3.9906e-08	-1.26644	0.237	0.372	0.00142437	SACS	COVID-19 induced	Up_in_Control
0.0462329	-1.26451	0.038	0.065	1	EEF2K	COVID-19 induced	Up_in_Control
0.0207418	-1.26447	0.048	0.09	1	TARS2	COVID-19 induced	Up_in_Control
0.00220468	-1.26436	0.038	0.092	1	CCDC9	COVID-19 induced	Up_in_Control
5.49137e-06	-1.26397	0.324	0.431	0.196003	NSUN6	COVID-19 induced	Up_in_Control
2.28889e-05	-1.26273	0.167	0.244	0.816974	STIL	COVID-19 induced	Up_in_Control
8.16395e-06	-1.26223	0.061	0.153	0.291396	NSUN2	COVID-19 induced	Up_in_Control
0.047435	-1.26223	0.032	0.064	1	PRADC1	COVID-19 induced	Up_in_Control
5.98445e-08	-1.26218	0.045	0.148	0.00213603	RRP12	COVID-19 induced	Up_in_Control
0.000164664	-1.26212	0.096	0.179	1	CNTN5	COVID-19 induced	Up_in_Control
4.04544e-06	-1.26108	0.138	0.252	0.144394	FANCA	COVID-19 induced	Up_in_Control
0.0258116	-1.26095	0.042	0.079	1	MSANTD4	COVID-19 induced	Up_in_Control
1.76595e-10	-1.26054	0.106	0.266	6.30319e-06	TCP1	COVID-19 induced	Up_in_Control
2.06787e-25	-1.25953	0.513	0.738	7.38085e-21	GOLGA4	COVID-19 induced	Up_in_Control
0.00555112	-1.25813	0.022	0.063	1	MFHAS1	COVID-19 induced	Up_in_Control
1.30464e-08	-1.25726	0.176	0.313	0.000465665	BRCA1	COVID-19 induced	Up_in_Control
7.69345e-06	-1.25659	0.048	0.134	0.274602	NTM	COVID-19 induced	Up_in_Control
0.187836	-1.25562	0.029	0.051	1	RNF125	COVID-19 induced	Up_in_Control
4.53521e-06	-1.2554	0.016	0.075	0.161875	CUEDC1	COVID-19 induced	Up_in_Control
4.25517e-06	-1.25522	0.163	0.275	0.15188	NKAPL	COVID-19 induced	Up_in_Control
4.36816e-15	-1.25499	0.324	0.502	1.55913e-10	UBC	COVID-19 induced	Up_in_Control
3.2489e-06	-1.25438	0.208	0.316	0.115963	MDC1	COVID-19 induced	Up_in_Control
0.0718946	-1.25348	0.038	0.056	1	HS3ST5	COVID-19 induced	Up_in_Control
0.00441742	-1.25253	0.061	0.115	1	SULF2	COVID-19 induced	Up_in_Control
1.69276e-09	-1.25169	0.067	0.197	6.04196e-05	PKD1	COVID-19 induced	Up_in_Control
0.207841	-1.25145	0.045	0.055	1	ACOX3	COVID-19 induced	Up_in_Control
0.00300286	-1.25138	0.083	0.137	1	PDIA4	COVID-19 induced	Up_in_Control
7.06099e-06	-1.25111	0.045	0.129	0.252028	SMCR8	COVID-19 induced	Up_in_Control
0.00102941	-1.25037	0.019	0.063	1	LINC01807	COVID-19 induced	Up_in_Control
1.0608e-06	-1.24954	0.067	0.172	0.0378631	RRN3	COVID-19 induced	Up_in_Control
0.00105351	-1.24884	0.051	0.114	1	TALDO1	COVID-19 induced	Up_in_Control
3.87223e-09	-1.24749	0.147	0.297	0.000138211	CCT4	COVID-19 induced	Up_in_Control
0.000173138	-1.24737	0.022	0.079	1	LSMEM1	COVID-19 induced	Up_in_Control
0.0322072	-1.24711	0.042	0.08	1	HAUS8	COVID-19 induced	Up_in_Control
0.000300933	-1.24698	0.061	0.135	1	BTBD2	COVID-19 induced	Up_in_Control
0.000205143	-1.24681	0.048	0.118	1	ZNF281	COVID-19 induced	Up_in_Control
3.75952e-10	-1.24665	0.212	0.378	1.34189e-05	DDX42	COVID-19 induced	Up_in_Control
0.00169273	-1.24616	0.032	0.083	1	TRNAU1AP	COVID-19 induced	Up_in_Control
0.0208881	-1.24612	0.048	0.091	1	CS	COVID-19 induced	Up_in_Control
9.13948e-07	-1.24546	0.119	0.237	0.0326215	ZNF473	COVID-19 induced	Up_in_Control
1.27504e-10	-1.24544	0.038	0.156	4.55099e-06	RMRP	COVID-19 induced	Up_in_Control
3.20451e-06	-1.24412	0.096	0.2	0.114379	ACOT7	COVID-19 induced	Up_in_Control
1.79753e-05	-1.2433	0.067	0.159	0.641592	DNAH11	COVID-19 induced	Up_in_Control
1.27926e-06	-1.24326	0.144	0.256	0.0456606	DTNB	COVID-19 induced	Up_in_Control
0.0530035	-1.24281	0.032	0.063	1	AC008591.1	COVID-19 induced	Up_in_Control
0.000769981	-1.24207	0.032	0.088	1	MRTO4	COVID-19 induced	Up_in_Control
0.000501465	-1.24206	0.013	0.055	1	RGL3	COVID-19 induced	Up_in_Control
0.00815558	-1.24164	0.106	0.147	1	MANF	COVID-19 induced	Up_in_Control
0.00236598	-1.24133	0.112	0.163	1	LRRC23	COVID-19 induced	Up_in_Control
0.0106834	-1.24052	0.029	0.069	1	CES2	COVID-19 induced	Up_in_Control
0.0049482	-1.2402	0.061	0.115	1	ZFAS1	COVID-19 induced	Up_in_Control
0.000117719	-1.23928	0.035	0.101	1	SUSD1	COVID-19 induced	Up_in_Control
0.0721975	-1.23834	0.035	0.064	1	ZNF561	COVID-19 induced	Up_in_Control
7.79958e-05	-1.23751	0.144	0.237	1	SNW1	COVID-19 induced	Up_in_Control
0.00134282	-1.23734	0.035	0.088	1	SIRT7	COVID-19 induced	Up_in_Control
4.33919e-08	-1.23692	0.173	0.316	0.00154879	LRP6	COVID-19 induced	Up_in_Control
0.0534251	-1.23609	0.035	0.068	1	KAT5	COVID-19 induced	Up_in_Control
1.39514e-07	-1.23537	0.144	0.276	0.00497968	RBBP8	COVID-19 induced	Up_in_Control
0.00370225	-1.23464	0.029	0.075	1	DNAH5	COVID-19 induced	Up_in_Control
3.56859e-07	-1.23457	0.099	0.22	0.0127374	SMARCC2	COVID-19 induced	Up_in_Control
0.11485	-1.23445	0.029	0.052	1	CCDC149	COVID-19 induced	Up_in_Control
3.87791e-05	-1.23418	0.013	0.062	1	TPM2	COVID-19 induced	Up_in_Control
1.13807e-05	-1.23316	0.138	0.241	0.40621	MIA3	COVID-19 induced	Up_in_Control
1.21993e-05	-1.23303	0.01	0.062	0.43543	SLC17A8	COVID-19 induced	Up_in_Control
0.00146873	-1.23267	0.013	0.051	1	C19orf48	COVID-19 induced	Up_in_Control
1.66132e-05	-1.23266	0.071	0.164	0.592973	GTF2F1	COVID-19 induced	Up_in_Control
5.05302e-09	-1.23244	0.131	0.278	0.000180357	PPP2R2D	COVID-19 induced	Up_in_Control
2.29105e-15	-1.23232	0.311	0.509	8.17745e-11	ARHGAP35	COVID-19 induced	Up_in_Control
0.00104036	-1.2305	0.032	0.086	1	ZNF34	COVID-19 induced	Up_in_Control
7.56367e-13	-1.22981	0.237	0.431	2.6997e-08	MDM4	COVID-19 induced	Up_in_Control
0.0244175	-1.2298	0.022	0.055	1	RCN3	COVID-19 induced	Up_in_Control
7.4149e-16	-1.22952	0.311	0.497	2.6466e-11	NSD1	COVID-19 induced	Up_in_Control
2.32552e-05	-1.2289	0.045	0.122	0.830048	AL592429.2	COVID-19 induced	Up_in_Control
0.000332472	-1.22839	0.144	0.214	1	MAP7D3	COVID-19 induced	Up_in_Control
4.55254e-07	-1.2281	0.035	0.123	0.0162494	OLMALINC	COVID-19 induced	Up_in_Control
0.00460359	-1.22807	0.054	0.103	1	TSEN15	COVID-19 induced	Up_in_Control
0.000810282	-1.22784	0.048	0.111	1	EARS2	COVID-19 induced	Up_in_Control
0.0693558	-1.22689	0.042	0.069	1	VPS4A	COVID-19 induced	Up_in_Control
1.99225e-06	-1.22656	0.17	0.285	0.0711094	NARF	COVID-19 induced	Up_in_Control
2.8322e-06	-1.22591	0.119	0.234	0.10109	KIAA0100	COVID-19 induced	Up_in_Control
5.04928e-06	-1.22578	0.067	0.165	0.180224	PXK	COVID-19 induced	Up_in_Control
0.000523474	-1.22558	0.135	0.186	1	KAZN-AS1	COVID-19 induced	Up_in_Control
0.000215324	-1.2251	0.071	0.149	1	PSMG4	COVID-19 induced	Up_in_Control
0.109261	-1.22384	0.048	0.074	1	RECQL	COVID-19 induced	Up_in_Control
2.73031e-07	-1.22366	0.478	0.532	0.00974529	ANKRD36C	COVID-19 induced	Up_in_Control
1.56501e-05	-1.2235	0.042	0.12	0.558599	KLC4	COVID-19 induced	Up_in_Control
0.00693615	-1.22273	0.019	0.055	1	SEMA3E	COVID-19 induced	Up_in_Control
2.56696e-05	-1.22249	0.138	0.243	0.916226	ADGRV1	COVID-19 induced	Up_in_Control
8.98353e-09	-1.22224	0.154	0.301	0.000320649	TOPAZ1	COVID-19 induced	Up_in_Control
0.0182022	-1.22151	0.045	0.088	1	GFRA1	COVID-19 induced	Up_in_Control
0.170317	-1.22098	0.045	0.064	1	MARVELD2	COVID-19 induced	Up_in_Control
0.000904553	-1.22062	0.029	0.082	1	PPARA	COVID-19 induced	Up_in_Control
0.0607212	-1.22023	0.026	0.054	1	AC008571.2	COVID-19 induced	Up_in_Control
3.85872e-06	-1.2189	0.147	0.265	0.137729	MSH6	COVID-19 induced	Up_in_Control
0.00843816	-1.21887	0.071	0.121	1	DLG4	COVID-19 induced	Up_in_Control
0.0100914	-1.21877	0.019	0.054	1	XIRP2	COVID-19 induced	Up_in_Control
2.03183e-15	-1.21813	0.269	0.486	7.25221e-11	RNF216	COVID-19 induced	Up_in_Control
1.68081e-06	-1.2176	0.08	0.188	0.0599933	C9orf78	COVID-19 induced	Up_in_Control
0.00511367	-1.21685	0.051	0.103	1	C19orf44	COVID-19 induced	Up_in_Control
0.000674257	-1.21626	0.103	0.178	1	MROH8	COVID-19 induced	Up_in_Control
4.20615e-08	-1.2157	0.17	0.306	0.0015013	ZNF236	COVID-19 induced	Up_in_Control
2.74073e-05	-1.21478	0.029	0.096	0.978247	GPM6A	COVID-19 induced	Up_in_Control
0.00566574	-1.21436	0.045	0.096	1	SNHG1	COVID-19 induced	Up_in_Control
0.0172254	-1.21222	0.051	0.096	1	MTIF2	COVID-19 induced	Up_in_Control
0.0436846	-1.21132	0.035	0.068	1	CD96	COVID-19 induced	Up_in_Control
0.0154768	-1.21006	0.042	0.085	1	AL022151.1	COVID-19 induced	Up_in_Control
0.0022252	-1.2099	0.019	0.06	1	PROSER2	COVID-19 induced	Up_in_Control
1.96308e-05	-1.20953	0.077	0.171	0.700683	ZNF462	COVID-19 induced	Up_in_Control
0.0485108	-1.20924	0.048	0.085	1	YAE1	COVID-19 induced	Up_in_Control
1.10193e-10	-1.20924	0.144	0.315	3.93311e-06	ZZEF1	COVID-19 induced	Up_in_Control
9.31815e-05	-1.20817	0.051	0.125	1	HECW1	COVID-19 induced	Up_in_Control
0.0612398	-1.20713	0.058	0.08	1	AC079352.1	COVID-19 induced	Up_in_Control
0.0175378	-1.20585	0.054	0.028	1	AL592295.3	COVID-19 induced	Up_in_Control
3.09885e-05	-1.20509	0.103	0.2	1	RBM23	COVID-19 induced	Up_in_Control
0.0484153	-1.20491	0.067	0.1	1	MIATNB	COVID-19 induced	Up_in_Control
0.00231926	-1.20421	0.019	0.061	1	GPATCH4	COVID-19 induced	Up_in_Control
5.57187e-09	-1.20357	0.167	0.323	0.000198877	CCDC93	COVID-19 induced	Up_in_Control
1.20275e-05	-1.20355	0.042	0.123	0.429296	GTF2IRD1	COVID-19 induced	Up_in_Control
3.2105e-05	-1.2021	0.058	0.142	1	ZNF354B	COVID-19 induced	Up_in_Control
1.35249e-13	-1.20199	0.256	0.463	4.82743e-09	U2SURP	COVID-19 induced	Up_in_Control
5.09651e-08	-1.20172	0.112	0.248	0.0018191	LARS	COVID-19 induced	Up_in_Control
2.14859e-05	-1.20154	0.131	0.235	0.766897	GTF3C1	COVID-19 induced	Up_in_Control
0.155586	-1.20139	0.029	0.051	1	AC074032.1	COVID-19 induced	Up_in_Control
5.57787e-06	-1.20078	0.061	0.155	0.199091	LRRFIP1	COVID-19 induced	Up_in_Control
0.0420168	-1.19962	0.09	0.107	1	PROSER3	COVID-19 induced	Up_in_Control
0.00238034	-1.19935	0.038	0.091	1	EMC1-AS1	COVID-19 induced	Up_in_Control
0.0118837	-1.19932	0.058	0.107	1	PLD6	COVID-19 induced	Up_in_Control
0.0003488	-1.19902	0.022	0.075	1	RANBP6	COVID-19 induced	Up_in_Control
3.18753e-06	-1.19864	0.08	0.185	0.113772	TLN1	COVID-19 induced	Up_in_Control
0.00953287	-1.19782	0.064	0.114	1	ZDHHC11B	COVID-19 induced	Up_in_Control
3.51004e-11	-1.19634	0.276	0.433	1.25284e-06	CCAR1	COVID-19 induced	Up_in_Control
0.0822356	-1.19599	0.071	0.099	1	SCLY	COVID-19 induced	Up_in_Control
0.00583524	-1.19589	0.067	0.122	1	ERVMER61-1	COVID-19 induced	Up_in_Control
0.00220579	-1.19559	0.038	0.092	1	WDR75	COVID-19 induced	Up_in_Control
1.78675e-15	-1.19474	0.51	0.683	6.37745e-11	CCDC88A	COVID-19 induced	Up_in_Control
9.15168e-13	-1.19404	0.304	0.493	3.26651e-08	CDK12	COVID-19 induced	Up_in_Control
2.68414e-05	-1.1935	0.125	0.227	0.958051	ACBD3	COVID-19 induced	Up_in_Control
1.08628e-07	-1.19212	0.128	0.266	0.00387726	LRP1B	COVID-19 induced	Up_in_Control
0.0261125	-1.19158	0.022	0.054	1	AC008945.2	COVID-19 induced	Up_in_Control
4.19883e-09	-1.19154	0.183	0.338	0.000149869	CLIP1	COVID-19 induced	Up_in_Control
0.0352857	-1.19107	0.035	0.069	1	AC021851.2	COVID-19 induced	Up_in_Control
0.00100324	-1.19066	0.103	0.176	1	PITRM1	COVID-19 induced	Up_in_Control
1.63346e-06	-1.19057	0.285	0.274	0.0583032	CCDC173	COVID-19 induced	Up_in_Control
0.00251947	-1.19053	0.115	0.181	1	PRKCZ	COVID-19 induced	Up_in_Control
2.05899e-09	-1.18929	0.215	0.379	7.34917e-05	USP8	COVID-19 induced	Up_in_Control
0.00119871	-1.18893	0.103	0.173	1	MYOM1	COVID-19 induced	Up_in_Control
0.0538907	-1.18858	0.042	0.073	1	ZDHHC6	COVID-19 induced	Up_in_Control
0.0262978	-1.18798	0.074	0.113	1	LY86-AS1	COVID-19 induced	Up_in_Control
1.25667e-27	-1.1871	0.455	0.662	4.48544e-23	GPBP1	COVID-19 induced	Up_in_Control
1.83489e-06	-1.18702	0.087	0.196	0.0654928	CLCN7	COVID-19 induced	Up_in_Control
0.00174843	-1.1868	0.08	0.146	1	KDM4A-AS1	COVID-19 induced	Up_in_Control
1.06957e-05	-1.18551	0.106	0.211	0.38176	VCX	COVID-19 induced	Up_in_Control
1.18092e-05	-1.18506	0.035	0.108	0.421506	DOCK10	COVID-19 induced	Up_in_Control
5.7601e-08	-1.18412	0.029	0.122	0.00205595	SLC35E3	COVID-19 induced	Up_in_Control
0.0843057	-1.18409	0.032	0.061	1	GINS4	COVID-19 induced	Up_in_Control
1.32588e-14	-1.18388	0.304	0.471	4.73248e-10	VPS53	COVID-19 induced	Up_in_Control
0.011368	-1.18375	0.087	0.135	1	SUFU	COVID-19 induced	Up_in_Control
9.55627e-14	-1.18319	0.337	0.5	3.41092e-09	SMC4	COVID-19 induced	Up_in_Control
9.0296e-09	-1.18276	0.205	0.355	0.000322294	RTF1	COVID-19 induced	Up_in_Control
3.70429e-09	-1.18171	0.026	0.115	0.000132217	CSNK1E	COVID-19 induced	Up_in_Control
0.0674638	-1.18113	0.054	0.09	1	LINC02822	COVID-19 induced	Up_in_Control
1.39777e-05	-1.17983	0.189	0.286	0.498905	ACIN1	COVID-19 induced	Up_in_Control
1.57882e-07	-1.17935	0.163	0.304	0.00563528	CECR2	COVID-19 induced	Up_in_Control
0.00131759	-1.17884	0.022	0.069	1	PHKG1	COVID-19 induced	Up_in_Control
0.00036618	-1.17883	0.029	0.085	1	CCDC81	COVID-19 induced	Up_in_Control
0.000694803	-1.17767	0.074	0.147	1	CUBN	COVID-19 induced	Up_in_Control
0.000143082	-1.17677	0.077	0.159	1	POLQ	COVID-19 induced	Up_in_Control
0.0575943	-1.17603	0.045	0.08	1	IFT20	COVID-19 induced	Up_in_Control
6.2201e-20	-1.17564	0.359	0.542	2.22014e-15	XPO1	COVID-19 induced	Up_in_Control
0.00277596	-1.17548	0.077	0.135	1	HPS4	COVID-19 induced	Up_in_Control
0.00121864	-1.17539	0.054	0.116	1	ALYREF	COVID-19 induced	Up_in_Control
0.0461147	-1.17537	0.032	0.064	1	PDE3A	COVID-19 induced	Up_in_Control
0.0327637	-1.174	0.045	0.083	1	BCAS2	COVID-19 induced	Up_in_Control
0.0611821	-1.17371	0.022	0.05	1	AL512380.2	COVID-19 induced	Up_in_Control
0.00112988	-1.17319	0.141	0.204	1	DDX43	COVID-19 induced	Up_in_Control
0.00142759	-1.17314	0.054	0.116	1	PRIM1	COVID-19 induced	Up_in_Control
2.81885e-08	-1.17295	0.061	0.178	0.00100613	AHSA1	COVID-19 induced	Up_in_Control
2.97914e-09	-1.17251	0.221	0.374	0.000106335	CPLANE1	COVID-19 induced	Up_in_Control
0.0448246	-1.17144	0.058	0.097	1	EDIL3	COVID-19 induced	Up_in_Control
0.10695	-1.17118	0.032	0.059	1	CALR3	COVID-19 induced	Up_in_Control
1.47661e-06	-1.17086	0.192	0.283	0.0527048	RPL31	COVID-19 induced	Up_in_Control
5.6054e-15	-1.17077	0.304	0.514	2.00074e-10	AHCTF1	COVID-19 induced	Up_in_Control
0.0154074	-1.17058	0.087	0.13	1	CNTROB	COVID-19 induced	Up_in_Control
3.01198e-15	-1.17048	0.304	0.5	1.07507e-10	KMT2E	COVID-19 induced	Up_in_Control
0.00156765	-1.17022	0.071	0.137	1	UBAC1	COVID-19 induced	Up_in_Control
0.00011194	-1.16971	0.067	0.148	1	PRKAG2	COVID-19 induced	Up_in_Control
1.9142e-05	-1.16897	0.019	0.078	0.683234	ADCK1	COVID-19 induced	Up_in_Control
5.45119e-06	-1.1689	0.045	0.131	0.194569	UTP23	COVID-19 induced	Up_in_Control
0.0422545	-1.16838	0.061	0.094	1	ATXN7L3	COVID-19 induced	Up_in_Control
0.00233864	-1.16803	0.022	0.067	1	CTTNBP2	COVID-19 induced	Up_in_Control
9.06066e-07	-1.16791	0.093	0.209	0.0323402	UBE2Q1	COVID-19 induced	Up_in_Control
0.00693157	-1.16784	0.054	0.107	1	NKAPD1	COVID-19 induced	Up_in_Control
0.0157274	-1.16757	0.019	0.051	1	INAFM1	COVID-19 induced	Up_in_Control
0.00368381	-1.16743	0.022	0.063	1	SV2C	COVID-19 induced	Up_in_Control
0.0390813	-1.16616	0.042	0.077	1	ZNF805	COVID-19 induced	Up_in_Control
0.00172569	-1.16582	0.109	0.165	1	NCAPD2	COVID-19 induced	Up_in_Control
2.87758e-10	-1.16458	0.253	0.418	1.0271e-05	DMXL2	COVID-19 induced	Up_in_Control
0.00330663	-1.16434	0.061	0.12	1	TMEM132B	COVID-19 induced	Up_in_Control
0.0140842	-1.16406	0.038	0.081	1	LINC01511	COVID-19 induced	Up_in_Control
0.00203534	-1.16379	0.042	0.096	1	SCRIB	COVID-19 induced	Up_in_Control
1.14781e-07	-1.1635	0.135	0.274	0.00409688	NRXN3	COVID-19 induced	Up_in_Control
1.23554e-08	-1.16349	0.154	0.303	0.000441	CSNK2A1	COVID-19 induced	Up_in_Control
0.0996101	-1.16314	0.042	0.068	1	HMCN1	COVID-19 induced	Up_in_Control
0.0323712	-1.16274	0.029	0.063	1	BAHCC1	COVID-19 induced	Up_in_Control
0.000107641	-1.16064	0.019	0.072	1	KCNN3	COVID-19 induced	Up_in_Control
0.00532556	-1.15965	0.061	0.117	1	SPRY4-AS1	COVID-19 induced	Up_in_Control
0.000294062	-1.15954	0.022	0.075	1	PCDH11Y	COVID-19 induced	Up_in_Control
1.57961e-09	-1.15941	0.103	0.252	5.63808e-05	CCNL2	COVID-19 induced	Up_in_Control
0.0276859	-1.15858	0.074	0.111	1	AC159540.2	COVID-19 induced	Up_in_Control
2.5004e-11	-1.15833	0.115	0.287	8.92468e-07	TSC1	COVID-19 induced	Up_in_Control
0.0135798	-1.15767	0.058	0.105	1	FAM3B	COVID-19 induced	Up_in_Control
2.57457e-05	-1.15764	0.144	0.245	0.918943	KIF14	COVID-19 induced	Up_in_Control
0.000234151	-1.15712	0.064	0.14	1	SUGP1	COVID-19 induced	Up_in_Control
0.00502072	-1.15626	0.038	0.087	1	MYRFL	COVID-19 induced	Up_in_Control
0.00210366	-1.1562	0.093	0.163	1	ELAVL3	COVID-19 induced	Up_in_Control
0.133052	-1.15596	0.051	0.069	1	ORC1	COVID-19 induced	Up_in_Control
0.000176317	-1.15534	0.067	0.146	1	DDX23	COVID-19 induced	Up_in_Control
1.42958e-05	-1.15493	0.131	0.238	0.510261	MLH1	COVID-19 induced	Up_in_Control
0.0149292	-1.15473	0.029	0.067	1	SHROOM4	COVID-19 induced	Up_in_Control
0.00427637	-1.1546	0.099	0.158	1	ZBTB40	COVID-19 induced	Up_in_Control
0.00347759	-1.1537	0.045	0.096	1	CRYBG1	COVID-19 induced	Up_in_Control
0.0812798	-1.15336	0.042	0.054	1	GOLGA8R	COVID-19 induced	Up_in_Control
0.21095	-1.15313	0.038	0.058	1	GLB1L3	COVID-19 induced	Up_in_Control
0.00111239	-1.15297	0.077	0.146	1	KCNJ15	COVID-19 induced	Up_in_Control
4.22452e-08	-1.15283	0.224	0.366	0.00150786	SERBP1	COVID-19 induced	Up_in_Control
0.0887111	-1.15275	0.026	0.052	1	TUT1	COVID-19 induced	Up_in_Control
0.197338	-1.15273	0.029	0.05	1	EPOP	COVID-19 induced	Up_in_Control
0.0082237	-1.15238	0.09	0.098	1	NALCN-AS1	COVID-19 induced	Up_in_Control
7.88429e-10	-1.15199	0.314	0.482	2.81414e-05	GCC2	COVID-19 induced	Up_in_Control
1.90258e-06	-1.1518	0.135	0.251	0.0679088	CEP295	COVID-19 induced	Up_in_Control
0.000954859	-1.15122	0.083	0.152	1	SDK2	COVID-19 induced	Up_in_Control
0.0050644	-1.14915	0.054	0.109	1	ZNF135	COVID-19 induced	Up_in_Control
0.00170237	-1.14878	0.109	0.162	1	NCAPG	COVID-19 induced	Up_in_Control
0.244971	-1.14863	0.035	0.053	1	ZNF425	COVID-19 induced	Up_in_Control
0.150585	-1.14821	0.032	0.056	1	SPINDOC	COVID-19 induced	Up_in_Control
0.000374739	-1.14799	0.08	0.159	1	ALK	COVID-19 induced	Up_in_Control
0.0790918	-1.14799	0.035	0.064	1	COPS6	COVID-19 induced	Up_in_Control
1.30648e-06	-1.14743	0.205	0.325	0.0466324	ZFYVE16	COVID-19 induced	Up_in_Control
1.06289e-10	-1.14718	0.186	0.368	3.79377e-06	MYO9B	COVID-19 induced	Up_in_Control
0.126148	-1.14717	0.035	0.061	1	HESX1	COVID-19 induced	Up_in_Control
0.00765236	-1.14695	0.042	0.089	1	RRP36	COVID-19 induced	Up_in_Control
9.13357e-06	-1.14674	0.103	0.208	0.326005	ZNF251	COVID-19 induced	Up_in_Control
0.001764	-1.14582	0.061	0.121	1	MGME1	COVID-19 induced	Up_in_Control
0.00127439	-1.14562	0.022	0.069	1	TMEM223	COVID-19 induced	Up_in_Control
0.0125782	-1.14554	0.054	0.103	1	RALYL	COVID-19 induced	Up_in_Control
0.0325546	-1.14492	0.077	0.111	1	GRIN2A	COVID-19 induced	Up_in_Control
0.199223	-1.1449	0.058	0.075	1	CYP46A1	COVID-19 induced	Up_in_Control
5.32467e-23	-1.14488	0.503	0.638	1.90053e-18	ANKRD12	COVID-19 induced	Up_in_Control
6.72809e-05	-1.14403	0.147	0.242	1	GOLGA1	COVID-19 induced	Up_in_Control
0.0119272	-1.14371	0.042	0.086	1	GABBR1	COVID-19 induced	Up_in_Control
2.86856e-16	-1.14319	0.407	0.535	1.02387e-11	ANKHD1	COVID-19 induced	Up_in_Control
0.225053	-1.14152	0.048	0.068	1	GAN	COVID-19 induced	Up_in_Control
0.0263322	-1.14134	0.019	0.05	1	MRPS23	COVID-19 induced	Up_in_Control
0.00364139	-1.14025	0.061	0.119	1	RPF2	COVID-19 induced	Up_in_Control
0.238511	-1.13908	0.051	0.069	1	GORAB	COVID-19 induced	Up_in_Control
0.000813064	-1.13832	0.125	0.193	1	TDRKH	COVID-19 induced	Up_in_Control
0.000702336	-1.13821	0.051	0.116	1	PRPF4	COVID-19 induced	Up_in_Control
6.25405e-05	-1.13809	0.013	0.062	1	PCDHGA1	COVID-19 induced	Up_in_Control
0.00234314	-1.13736	0.061	0.121	1	STPG4	COVID-19 induced	Up_in_Control
4.09091e-10	-1.13732	0.244	0.407	1.46017e-05	TCERG1	COVID-19 induced	Up_in_Control
3.19489e-07	-1.13704	0.202	0.307	0.0114035	EMSY	COVID-19 induced	Up_in_Control
3.83903e-13	-1.13675	0.295	0.49	1.37026e-08	TRRAP	COVID-19 induced	Up_in_Control
0.0727934	-1.13659	0.042	0.071	1	SNAP25-AS1	COVID-19 induced	Up_in_Control
1.28693e-05	-1.13543	0.038	0.114	0.459344	HSPE1	COVID-19 induced	Up_in_Control
0.00485792	-1.13497	0.074	0.134	1	OSBPL2	COVID-19 induced	Up_in_Control
0.00682745	-1.13496	0.067	0.123	1	AC008438.1	COVID-19 induced	Up_in_Control
4.39712e-06	-1.13484	0.048	0.135	0.156946	BAG3	COVID-19 induced	Up_in_Control
6.50967e-05	-1.13385	0.045	0.119	1	FLCN	COVID-19 induced	Up_in_Control
0.234179	-1.1338	0.042	0.062	1	GTF2IRD2B	COVID-19 induced	Up_in_Control
3.15311e-10	-1.13334	0.237	0.406	1.12544e-05	PPIG	COVID-19 induced	Up_in_Control
8.64891e-07	-1.13321	0.157	0.28	0.0308706	P4HB	COVID-19 induced	Up_in_Control
0.000641337	-1.1329	0.083	0.16	1	FMN2	COVID-19 induced	Up_in_Control
6.53781e-06	-1.13286	0.125	0.236	0.233354	PKNOX1	COVID-19 induced	Up_in_Control
0.000299887	-1.13281	0.048	0.116	1	NR1H2	COVID-19 induced	Up_in_Control
0.151364	-1.13271	0.061	0.079	1	SPIRE2	COVID-19 induced	Up_in_Control
3.2851e-05	-1.13252	0.109	0.208	1	KMT2D	COVID-19 induced	Up_in_Control
0.0117205	-1.13199	0.032	0.073	1	MGAM	COVID-19 induced	Up_in_Control
3.39922e-08	-1.13138	0.119	0.259	0.00121328	DNAJC2	COVID-19 induced	Up_in_Control
1.72478e-10	-1.13104	0.256	0.43	6.15627e-06	BMPR2	COVID-19 induced	Up_in_Control
0.0476759	-1.1305	0.038	0.073	1	FAM120C	COVID-19 induced	Up_in_Control
6.37221e-10	-1.13011	0.083	0.226	2.27443e-05	PDPK1	COVID-19 induced	Up_in_Control
0.0184822	-1.12956	0.042	0.069	1	PEBP4	COVID-19 induced	Up_in_Control
0.0212787	-1.12955	0.08	0.12	1	KDM4A	COVID-19 induced	Up_in_Control
0.0817237	-1.12912	0.038	0.068	1	RNF212B	COVID-19 induced	Up_in_Control
7.69368e-07	-1.12896	0.167	0.296	0.0274611	COPB1	COVID-19 induced	Up_in_Control
0.0213996	-1.12852	0.019	0.051	1	CTBP1-DT	COVID-19 induced	Up_in_Control
8.99057e-05	-1.12746	0.061	0.141	1	WDR5	COVID-19 induced	Up_in_Control
1.04236e-11	-1.12711	0.282	0.454	3.7205e-07	KPNB1	COVID-19 induced	Up_in_Control
2.44339e-08	-1.12664	0.096	0.23	0.000872119	BMS1	COVID-19 induced	Up_in_Control
0.192438	-1.12646	0.032	0.052	1	CALCB	COVID-19 induced	Up_in_Control
2.10339e-08	-1.12593	0.058	0.174	0.000750762	C17orf67	COVID-19 induced	Up_in_Control
0.0478226	-1.12562	0.042	0.075	1	PREX1	COVID-19 induced	Up_in_Control
0.108965	-1.12552	0.061	0.088	1	GRHL1	COVID-19 induced	Up_in_Control
0.000326567	-1.12451	0.205	0.286	1	CKS2	COVID-19 induced	Up_in_Control
0.0189477	-1.12428	0.022	0.056	1	AC016074.2	COVID-19 induced	Up_in_Control
0.010013	-1.12407	0.054	0.105	1	RNF126	COVID-19 induced	Up_in_Control
1.11485e-09	-1.12402	0.112	0.266	3.97922e-05	SUPT6H	COVID-19 induced	Up_in_Control
2.94942e-06	-1.12355	0.051	0.143	0.105274	FAM149A	COVID-19 induced	Up_in_Control
1.55539e-12	-1.12339	0.269	0.475	5.55165e-08	VPS13D	COVID-19 induced	Up_in_Control
0.00141667	-1.12328	0.058	0.12	1	ZNF333	COVID-19 induced	Up_in_Control
3.49005e-05	-1.12273	0.051	0.132	1	RIC8A	COVID-19 induced	Up_in_Control
0.000444944	-1.1225	0.074	0.15	1	AREL1	COVID-19 induced	Up_in_Control
8.34947e-06	-1.12224	0.109	0.215	0.298018	GABPB2	COVID-19 induced	Up_in_Control
3.89304e-05	-1.12224	0.042	0.116	1	PHF23	COVID-19 induced	Up_in_Control
0.00526288	-1.12177	0.064	0.097	1	NADSYN1	COVID-19 induced	Up_in_Control
0.000404408	-1.12175	0.093	0.174	1	GCN1	COVID-19 induced	Up_in_Control
1.57907e-05	-1.12172	0.112	0.218	0.563616	UBE2Z	COVID-19 induced	Up_in_Control
0.00112416	-1.12145	0.038	0.094	1	LINC02196	COVID-19 induced	Up_in_Control
6.81491e-07	-1.12114	0.119	0.244	0.0243245	CAMSAP1	COVID-19 induced	Up_in_Control
1.01926e-08	-1.121	0.173	0.33	0.000363803	UBA2	COVID-19 induced	Up_in_Control
0.0946458	-1.11997	0.071	0.1	1	AURKA	COVID-19 induced	Up_in_Control
0.000241836	-1.11944	0.067	0.144	1	GOLGA6L10	COVID-19 induced	Up_in_Control
0.000461172	-1.11942	0.061	0.132	1	ALCAM	COVID-19 induced	Up_in_Control
7.10943e-05	-1.11815	0.061	0.142	1	MLLT3	COVID-19 induced	Up_in_Control
0.222093	-1.11809	0.048	0.051	1	ZNF169	COVID-19 induced	Up_in_Control
0.000154639	-1.11803	0.119	0.21	1	TMCO3	COVID-19 induced	Up_in_Control
2.55264e-05	-1.1179	0.115	0.216	0.911112	ATAD5	COVID-19 induced	Up_in_Control
0.18166	-1.11743	0.029	0.05	1	AC006296.3	COVID-19 induced	Up_in_Control
2.21987e-07	-1.11711	0.218	0.348	0.00792339	GAPVD1	COVID-19 induced	Up_in_Control
0.00011218	-1.11618	0.125	0.216	1	DDX18	COVID-19 induced	Up_in_Control
7.81586e-09	-1.11552	0.154	0.31	0.000278972	EIF3J	COVID-19 induced	Up_in_Control
0.229445	-1.11453	0.042	0.057	1	STIMATE	COVID-19 induced	Up_in_Control
0.0495675	-1.11451	0.042	0.075	1	PTGR2	COVID-19 induced	Up_in_Control
1.30683e-07	-1.11435	0.071	0.186	0.00466446	GID8	COVID-19 induced	Up_in_Control
0.000405275	-1.11295	0.093	0.174	1	HDAC6	COVID-19 induced	Up_in_Control
0.00130782	-1.11271	0.167	0.239	1	ASF1B	COVID-19 induced	Up_in_Control
0.00579784	-1.11202	0.077	0.131	1	NTN1	COVID-19 induced	Up_in_Control
0.000276836	-1.11195	0.147	0.22	1	CBX1	COVID-19 induced	Up_in_Control
1.05432e-06	-1.11175	0.205	0.329	0.0376317	DIP2A	COVID-19 induced	Up_in_Control
0.00248851	-1.11119	0.077	0.143	1	AGBL1	COVID-19 induced	Up_in_Control
9.62449e-08	-1.11072	0.224	0.32	0.00343527	CCP110	COVID-19 induced	Up_in_Control
0.0207604	-1.11016	0.029	0.065	1	LINC00536	COVID-19 induced	Up_in_Control
0.00229892	-1.1089	0.061	0.123	1	AC120193.1	COVID-19 induced	Up_in_Control
0.0375947	-1.10874	0.077	0.121	1	DCTN1	COVID-19 induced	Up_in_Control
5.43271e-14	-1.10849	0.256	0.475	1.9391e-09	RANBP2	COVID-19 induced	Up_in_Control
0.00170427	-1.10801	0.051	0.112	1	MCM10	COVID-19 induced	Up_in_Control
0.00848693	-1.10792	0.026	0.065	1	SLC24A2	COVID-19 induced	Up_in_Control
0.000236717	-1.10792	0.061	0.136	1	CHERP	COVID-19 induced	Up_in_Control
8.64549e-11	-1.10782	0.237	0.418	3.08583e-06	GON4L	COVID-19 induced	Up_in_Control
6.797e-05	-1.1075	0.154	0.254	1	CWC15	COVID-19 induced	Up_in_Control
0.00497269	-1.10462	0.071	0.13	1	MYRIP	COVID-19 induced	Up_in_Control
7.70854e-09	-1.10412	0.026	0.112	0.000275141	HCFC1	COVID-19 induced	Up_in_Control
0.144305	-1.10279	0.045	0.071	1	ITGA8	COVID-19 induced	Up_in_Control
0.0012035	-1.10257	0.032	0.084	1	ACTR8	COVID-19 induced	Up_in_Control
0.0626299	-1.10169	0.042	0.072	1	SH2B3	COVID-19 induced	Up_in_Control
0.0075564	-1.10114	0.106	0.156	1	FAM174B	COVID-19 induced	Up_in_Control
0.00124184	-1.10084	0.029	0.08	1	CERS4	COVID-19 induced	Up_in_Control
0.0179798	-1.1004	0.064	0.109	1	ZFP2	COVID-19 induced	Up_in_Control
6.59853e-11	-1.09949	0.288	0.44	2.35521e-06	CNOT1	COVID-19 induced	Up_in_Control
8.54635e-06	-1.09939	0.048	0.133	0.305045	RECQL4	COVID-19 induced	Up_in_Control
0.00954054	-1.09924	0.026	0.065	1	AC103409.1	COVID-19 induced	Up_in_Control
1.49436e-07	-1.09811	0.25	0.369	0.0053338	RFC3	COVID-19 induced	Up_in_Control
0.150475	-1.09757	0.032	0.055	1	SHPK	COVID-19 induced	Up_in_Control
1.81079e-05	-1.09739	0.096	0.196	0.646327	TOPORS	COVID-19 induced	Up_in_Control
0.0160374	-1.0968	0.067	0.116	1	MYH3	COVID-19 induced	Up_in_Control
0.0162547	-1.09659	0.022	0.057	1	FBXO27	COVID-19 induced	Up_in_Control
0.00168572	-1.09606	0.026	0.073	1	METTL22	COVID-19 induced	Up_in_Control
0.000235046	-1.09558	0.019	0.068	1	BID	COVID-19 induced	Up_in_Control
3.18032e-05	-1.09504	0.087	0.18	1	RNF40	COVID-19 induced	Up_in_Control
0.00277946	-1.09492	0.019	0.058	1	KIAA2012	COVID-19 induced	Up_in_Control
0.000407395	-1.09322	0.103	0.186	1	ADARB2	COVID-19 induced	Up_in_Control
3.56702e-05	-1.09271	0.115	0.215	1	GOLGA5	COVID-19 induced	Up_in_Control
0.000657506	-1.09099	0.054	0.121	1	DENND2A	COVID-19 induced	Up_in_Control
8.49033e-08	-1.08927	0.353	0.469	0.00303045	BRDT	COVID-19 induced	Up_in_Control
0.0776893	-1.08903	0.038	0.065	1	MKNK1	COVID-19 induced	Up_in_Control
0.00620068	-1.08894	0.099	0.157	1	HEXIM1	COVID-19 induced	Up_in_Control
6.29762e-05	-1.08884	0.077	0.165	1	WHAMM	COVID-19 induced	Up_in_Control
0.0131849	-1.0888	0.058	0.107	1	ZNF7	COVID-19 induced	Up_in_Control
0.000195018	-1.08873	0.01	0.051	1	PTGER3	COVID-19 induced	Up_in_Control
0.001085	-1.08846	0.058	0.122	1	ACVR2B	COVID-19 induced	Up_in_Control
1.10053e-05	-1.08833	0.353	0.375	0.392812	ANKRD36B	COVID-19 induced	Up_in_Control
3.99468e-05	-1.08816	0.048	0.127	1	RASA3	COVID-19 induced	Up_in_Control
0.000648956	-1.08806	0.112	0.194	1	RAPGEF1	COVID-19 induced	Up_in_Control
0.0128489	-1.08805	0.019	0.052	1	RBMS3-AS3	COVID-19 induced	Up_in_Control
0.00535336	-1.08796	0.029	0.073	1	TMEM266	COVID-19 induced	Up_in_Control
0.0216217	-1.0879	0.042	0.083	1	CCND3	COVID-19 induced	Up_in_Control
0.00393841	-1.08742	0.051	0.107	1	SESN2	COVID-19 induced	Up_in_Control
5.41595e-15	-1.0872	0.378	0.558	1.93312e-10	MGA	COVID-19 induced	Up_in_Control
0.00648375	-1.08689	0.042	0.09	1	ZBTB8A	COVID-19 induced	Up_in_Control
0.00405085	-1.08614	0.042	0.093	1	PRR12	COVID-19 induced	Up_in_Control
0.00378022	-1.08518	0.099	0.16	1	ACSBG1	COVID-19 induced	Up_in_Control
0.000554726	-1.08488	0.234	0.304	1	CFAP53	COVID-19 induced	Up_in_Control
2.25414e-06	-1.08432	0.167	0.292	0.0804571	ZMYM5	COVID-19 induced	Up_in_Control
3.67093e-05	-1.08341	0.128	0.234	1	RPL4	COVID-19 induced	Up_in_Control
3.00116e-07	-1.08254	0.119	0.248	0.0107121	CCT5	COVID-19 induced	Up_in_Control
0.00874872	-1.0822	0.064	0.117	1	AC019205.1	COVID-19 induced	Up_in_Control
1.88264e-05	-1.08107	0.058	0.143	0.671971	CLK2	COVID-19 induced	Up_in_Control
0.00706508	-1.08022	0.032	0.075	1	PLIN3	COVID-19 induced	Up_in_Control
4.19503e-05	-1.08012	0.083	0.176	1	NEDD4L	COVID-19 induced	Up_in_Control
0.277603	-1.07909	0.038	0.056	1	AC104088.1	COVID-19 induced	Up_in_Control
0.000331413	-1.07862	0.131	0.216	1	CSAD	COVID-19 induced	Up_in_Control
0.0452945	-1.07857	0.058	0.096	1	DNAH1	COVID-19 induced	Up_in_Control
0.00213779	-1.07832	0.106	0.175	1	PRPF18	COVID-19 induced	Up_in_Control
0.200322	-1.07788	0.038	0.062	1	SAMD3	COVID-19 induced	Up_in_Control
3.55429e-05	-1.07762	0.179	0.274	1	HMGXB4	COVID-19 induced	Up_in_Control
1.89176e-05	-1.07625	0.157	0.257	0.675226	ANAPC7	COVID-19 induced	Up_in_Control
0.000587483	-1.07618	0.022	0.07	1	UPP2	COVID-19 induced	Up_in_Control
5.40246e-05	-1.07606	0.077	0.165	1	ADAT1	COVID-19 induced	Up_in_Control
4.72819e-05	-1.07584	0.186	0.261	1	POLE	COVID-19 induced	Up_in_Control
1.24533e-09	-1.07553	0.34	0.492	4.44494e-05	RSF1	COVID-19 induced	Up_in_Control
4.29843e-05	-1.07435	0.144	0.248	1	TBL1X	COVID-19 induced	Up_in_Control
0.00559664	-1.07389	0.058	0.111	1	NBPF12	COVID-19 induced	Up_in_Control
1.987e-09	-1.07318	0.25	0.398	7.0922e-05	THRAP3	COVID-19 induced	Up_in_Control
0.0361955	-1.07317	0.032	0.066	1	TRANK1	COVID-19 induced	Up_in_Control
0.000200447	-1.07314	0.042	0.109	1	GPR156	COVID-19 induced	Up_in_Control
0.203681	-1.07227	0.048	0.057	1	ITGA9-AS1	COVID-19 induced	Up_in_Control
4.14881e-06	-1.07101	0.122	0.237	0.148084	FANCD2	COVID-19 induced	Up_in_Control
0.00611126	-1.07083	0.103	0.162	1	NFXL1	COVID-19 induced	Up_in_Control
0.0180778	-1.07035	0.054	0.101	1	DIS3L	COVID-19 induced	Up_in_Control
0.060415	-1.0694	0.08	0.118	1	SLC25A42	COVID-19 induced	Up_in_Control
0.00018752	-1.06927	0.147	0.24	1	CADM2	COVID-19 induced	Up_in_Control
5.50054e-09	-1.06906	0.256	0.418	0.000196331	GGNBP2	COVID-19 induced	Up_in_Control
0.00512366	-1.06894	0.122	0.166	1	LINC02074	COVID-19 induced	Up_in_Control
0.0116648	-1.06888	0.042	0.085	1	MYH15	COVID-19 induced	Up_in_Control
0.0179787	-1.0684	0.103	0.124	1	CRAT	COVID-19 induced	Up_in_Control
0.000870772	-1.06786	0.135	0.217	1	PTPRT	COVID-19 induced	Up_in_Control
0.0650415	-1.06718	0.048	0.082	1	SPTBN2	COVID-19 induced	Up_in_Control
0.097219	-1.06695	0.048	0.08	1	AC004834.1	COVID-19 induced	Up_in_Control
0.0013672	-1.06669	0.176	0.228	1	AC061958.1	COVID-19 induced	Up_in_Control
0.000315927	-1.06658	0.189	0.234	1	PAN2	COVID-19 induced	Up_in_Control
1.20895e-06	-1.06651	0.17	0.29	0.043151	NUP88	COVID-19 induced	Up_in_Control
9.91412e-05	-1.06626	0.029	0.09	1	LINC01482	COVID-19 induced	Up_in_Control
0.00666705	-1.06563	0.064	0.117	1	TLE1	COVID-19 induced	Up_in_Control
3.62644e-06	-1.06561	0.16	0.277	0.129439	SYNRG	COVID-19 induced	Up_in_Control
0.000829686	-1.06529	0.064	0.133	1	YTHDF1	COVID-19 induced	Up_in_Control
0.0175597	-1.06525	0.099	0.146	1	WDHD1	COVID-19 induced	Up_in_Control
0.00985275	-1.06407	0.128	0.172	1	SELENOS	COVID-19 induced	Up_in_Control
0.00104456	-1.06407	0.128	0.211	1	PARP16	COVID-19 induced	Up_in_Control
0.00626172	-1.06403	0.048	0.099	1	CREB5	COVID-19 induced	Up_in_Control
0.0108486	-1.06344	0.096	0.149	1	PLCG1	COVID-19 induced	Up_in_Control
0.0469923	-1.06338	0.048	0.085	1	DHTKD1	COVID-19 induced	Up_in_Control
0.0331244	-1.06266	0.022	0.053	1	FAM50A	COVID-19 induced	Up_in_Control
0.00209114	-1.0624	0.112	0.186	1	RNF168	COVID-19 induced	Up_in_Control
0.0707938	-1.06204	0.087	0.118	1	RPP38	COVID-19 induced	Up_in_Control
7.29456e-11	-1.0616	0.189	0.354	2.60365e-06	ST13	COVID-19 induced	Up_in_Control
0.0701393	-1.06123	0.032	0.061	1	C10orf90	COVID-19 induced	Up_in_Control
0.000754931	-1.06106	0.157	0.223	1	TOPBP1	COVID-19 induced	Up_in_Control
1.65132e-05	-1.06089	0.109	0.213	0.589404	INO80D	COVID-19 induced	Up_in_Control
3.24743e-09	-1.05995	0.157	0.317	0.000115911	METAP2	COVID-19 induced	Up_in_Control
0.000864373	-1.05917	0.083	0.155	1	CEP89	COVID-19 induced	Up_in_Control
0.000181661	-1.05865	0.019	0.068	1	PLEKHA6	COVID-19 induced	Up_in_Control
0.00521393	-1.05858	0.096	0.149	1	LINC01019	COVID-19 induced	Up_in_Control
0.00204305	-1.05845	0.103	0.174	1	B3GLCT	COVID-19 induced	Up_in_Control
0.0499244	-1.05841	0.045	0.081	1	CSKMT	COVID-19 induced	Up_in_Control
0.018996	-1.05823	0.074	0.114	1	CDC45	COVID-19 induced	Up_in_Control
0.173082	-1.05796	0.054	0.074	1	LINC00922	COVID-19 induced	Up_in_Control
0.233741	-1.05791	0.035	0.051	1	TCP11L2	COVID-19 induced	Up_in_Control
0.0703867	-1.05723	0.029	0.058	1	HIC2	COVID-19 induced	Up_in_Control
0.00145888	-1.05716	0.128	0.187	1	NEK2	COVID-19 induced	Up_in_Control
0.0268879	-1.05713	0.071	0.11	1	BCR	COVID-19 induced	Up_in_Control
0.00518776	-1.05698	0.026	0.068	1	LUCAT1	COVID-19 induced	Up_in_Control
6.61565e-07	-1.05696	0.212	0.345	0.0236132	ILF3	COVID-19 induced	Up_in_Control
4.6546e-07	-1.05694	0.048	0.142	0.0166137	RHBDD2	COVID-19 induced	Up_in_Control
0.216454	-1.05653	0.048	0.071	1	DDX51	COVID-19 induced	Up_in_Control
0.13041	-1.05578	0.051	0.075	1	MROH2B	COVID-19 induced	Up_in_Control
0.00296769	-1.05503	0.022	0.062	1	SLC14A2	COVID-19 induced	Up_in_Control
5.86231e-05	-1.05489	0.122	0.223	1	FRMD4A	COVID-19 induced	Up_in_Control
0.01187	-1.05409	0.103	0.151	1	GIT2	COVID-19 induced	Up_in_Control
2.94585e-09	-1.05281	0.292	0.404	0.000105146	ART3	COVID-19 induced	Up_in_Control
0.0480777	-1.05264	0.032	0.064	1	HIST1H1T	COVID-19 induced	Up_in_Control
0.0013899	-1.05262	0.035	0.088	1	DFFA	COVID-19 induced	Up_in_Control
8.27969e-05	-1.05242	0.083	0.171	1	PRKAR1B	COVID-19 induced	Up_in_Control
0.00977656	-1.05241	0.051	0.1	1	SORCS3	COVID-19 induced	Up_in_Control
0.000182852	-1.05221	0.112	0.195	1	MRPS6	COVID-19 induced	Up_in_Control
1.40429e-05	-1.05216	0.135	0.245	0.501231	SSBP3	COVID-19 induced	Up_in_Control
0.0397119	-1.05158	0.035	0.067	1	AL022311.1	COVID-19 induced	Up_in_Control
1.42397e-05	-1.05141	0.058	0.145	0.508259	SETD1B	COVID-19 induced	Up_in_Control
0.00181097	-1.0511	0.119	0.192	1	ZNF143	COVID-19 induced	Up_in_Control
0.00126487	-1.05037	0.061	0.126	1	DMPK	COVID-19 induced	Up_in_Control
0.000119798	-1.04934	0.119	0.209	1	DEPDC5	COVID-19 induced	Up_in_Control
3.58931e-13	-1.04919	0.359	0.523	1.28113e-08	HP1BP3	COVID-19 induced	Up_in_Control
0.000201617	-1.04889	0.125	0.218	1	OFD1	COVID-19 induced	Up_in_Control
0.0431643	-1.04835	0.045	0.082	1	PEX6	COVID-19 induced	Up_in_Control
2.62197e-07	-1.04827	0.196	0.33	0.00935858	PHF8	COVID-19 induced	Up_in_Control
0.112268	-1.04758	0.048	0.075	1	PRR11	COVID-19 induced	Up_in_Control
0.00293312	-1.04713	0.131	0.192	1	RNF34	COVID-19 induced	Up_in_Control
6.48881e-06	-1.04644	0.077	0.176	0.231605	ZBTB46	COVID-19 induced	Up_in_Control
0.00133148	-1.04628	0.067	0.134	1	AXIN1	COVID-19 induced	Up_in_Control
0.0152041	-1.04609	0.09	0.144	1	TRAF2	COVID-19 induced	Up_in_Control
0.00525547	-1.04548	0.038	0.086	1	FBLN1	COVID-19 induced	Up_in_Control
0.00557173	-1.04508	0.08	0.14	1	DLGAP5	COVID-19 induced	Up_in_Control
0.000113482	-1.04435	0.071	0.153	1	MCM7	COVID-19 induced	Up_in_Control
0.00100014	-1.04421	0.167	0.223	1	CLTCL1	COVID-19 induced	Up_in_Control
0.0617821	-1.04415	0.045	0.08	1	ZNF263	COVID-19 induced	Up_in_Control
0.000302713	-1.04406	0.192	0.269	1	CDK5RAP2	COVID-19 induced	Up_in_Control
1.92956e-05	-1.04321	0.151	0.263	0.688719	TDRD12	COVID-19 induced	Up_in_Control
0.00365419	-1.04295	0.096	0.149	1	INTU	COVID-19 induced	Up_in_Control
3.33368e-08	-1.04284	0.218	0.352	0.00118989	SAFB	COVID-19 induced	Up_in_Control
7.77388e-05	-1.0428	0.032	0.096	1	BCORL1	COVID-19 induced	Up_in_Control
0.00265365	-1.04245	0.106	0.167	1	AC139887.2	COVID-19 induced	Up_in_Control
0.124765	-1.04216	0.048	0.063	1	RNFT2	COVID-19 induced	Up_in_Control
0.025321	-1.04199	0.071	0.114	1	LINC00452	COVID-19 induced	Up_in_Control
0.00708205	-1.04167	0.099	0.148	1	NDE1	COVID-19 induced	Up_in_Control
0.000117373	-1.04038	0.157	0.252	1	PRKRIP1	COVID-19 induced	Up_in_Control
0.000114867	-1.0401	0.048	0.121	1	ARHGEF18	COVID-19 induced	Up_in_Control
1.05316e-08	-1.0393	0.179	0.339	0.000375904	SIN3A	COVID-19 induced	Up_in_Control
0.0648086	-1.03926	0.026	0.054	1	SRP14-AS1	COVID-19 induced	Up_in_Control
0.223167	-1.0388	0.032	0.053	1	SLC30A10	COVID-19 induced	Up_in_Control
0.0594365	-1.03743	0.083	0.119	1	PAAF1	COVID-19 induced	Up_in_Control
0.00931778	-1.03716	0.074	0.129	1	CCDC134	COVID-19 induced	Up_in_Control
0.00233983	-1.03704	0.061	0.122	1	LHFPL3	COVID-19 induced	Up_in_Control
3.42684e-05	-1.03701	0.08	0.173	1	SSB	COVID-19 induced	Up_in_Control
2.56461e-08	-1.03671	0.224	0.383	0.000915387	SPTAN1	COVID-19 induced	Up_in_Control
5.82804e-05	-1.03616	0.093	0.187	1	ZNF606	COVID-19 induced	Up_in_Control
3.4768e-05	-1.03612	0.045	0.119	1	CPAMD8	COVID-19 induced	Up_in_Control
0.000606189	-1.03597	0.013	0.053	1	SULT2B1	COVID-19 induced	Up_in_Control
6.95494e-06	-1.0357	0.151	0.267	0.248243	WDR37	COVID-19 induced	Up_in_Control
1.35714e-05	-1.03548	0.147	0.254	0.484406	DNAJA4	COVID-19 induced	Up_in_Control
0.01495	-1.03526	0.125	0.164	1	TNXB	COVID-19 induced	Up_in_Control
6.5107e-05	-1.03519	0.099	0.194	1	ZNF331	COVID-19 induced	Up_in_Control
9.42972e-09	-1.03438	0.304	0.448	0.000336575	TCF25	COVID-19 induced	Up_in_Control
0.0002098	-1.03428	0.032	0.092	1	SRP68	COVID-19 induced	Up_in_Control
2.01587e-09	-1.03412	0.176	0.339	7.19525e-05	NUDC	COVID-19 induced	Up_in_Control
0.000448626	-1.03367	0.115	0.201	1	APLP2	COVID-19 induced	Up_in_Control
0.00527747	-1.03361	0.103	0.16	1	SNAPC4	COVID-19 induced	Up_in_Control
0.00110208	-1.03348	0.087	0.159	1	PNPLA7	COVID-19 induced	Up_in_Control
0.00176525	-1.03233	0.083	0.154	1	ERCC3	COVID-19 induced	Up_in_Control
0.0302621	-1.0321	0.061	0.104	1	USP39	COVID-19 induced	Up_in_Control
0.0590886	-1.03178	0.058	0.096	1	EXD3	COVID-19 induced	Up_in_Control
0.0174023	-1.03175	0.042	0.084	1	WDR46	COVID-19 induced	Up_in_Control
5.66835e-07	-1.03164	0.125	0.253	0.020232	PRPF6	COVID-19 induced	Up_in_Control
0.0189398	-1.0316	0.042	0.083	1	ASMTL	COVID-19 induced	Up_in_Control
0.00624874	-1.03122	0.125	0.188	1	PHACTR1	COVID-19 induced	Up_in_Control
8.80462e-07	-1.03095	0.224	0.359	0.0314263	ZFYVE9	COVID-19 induced	Up_in_Control
0.0307682	-1.03086	0.042	0.077	1	GLI3	COVID-19 induced	Up_in_Control
0.0150664	-1.02954	0.096	0.142	1	DNAJC5G	COVID-19 induced	Up_in_Control
0.00399841	-1.02944	0.087	0.145	1	DOP1B	COVID-19 induced	Up_in_Control
0.160402	-1.02897	0.064	0.084	1	RINT1	COVID-19 induced	Up_in_Control
6.15092e-11	-1.02839	0.288	0.47	2.19545e-06	SMARCC1	COVID-19 induced	Up_in_Control
0.000301163	-1.02837	0.064	0.139	1	AKAP17A	COVID-19 induced	Up_in_Control
0.0137122	-1.02835	0.051	0.099	1	MRPL28	COVID-19 induced	Up_in_Control
0.00524764	-1.02783	0.077	0.136	1	SLIT3	COVID-19 induced	Up_in_Control
4.10243e-05	-1.02704	0.045	0.118	1	MESD	COVID-19 induced	Up_in_Control
1.02109e-05	-1.02675	0.212	0.309	0.364458	CALR	COVID-19 induced	Up_in_Control
0.0490642	-1.02664	0.048	0.084	1	GNE	COVID-19 induced	Up_in_Control
2.2316e-05	-1.02647	0.202	0.301	0.796526	FANCI	COVID-19 induced	Up_in_Control
0.00100862	-1.02539	0.071	0.14	1	CHAMP1	COVID-19 induced	Up_in_Control
0.000245588	-1.02487	0.125	0.216	1	GDI2	COVID-19 induced	Up_in_Control
0.000170239	-1.02343	0.205	0.286	1	TIAM2	COVID-19 induced	Up_in_Control
0.0758263	-1.0234	0.048	0.079	1	ENTR1	COVID-19 induced	Up_in_Control
0.0794823	-1.02326	0.051	0.085	1	LINC01470	COVID-19 induced	Up_in_Control
0.0094647	-1.0226	0.138	0.188	1	COPRS	COVID-19 induced	Up_in_Control
0.0147257	-1.02125	0.064	0.115	1	TMC1	COVID-19 induced	Up_in_Control
1.53022e-08	-1.02125	0.288	0.416	0.00054618	ATM	COVID-19 induced	Up_in_Control
0.0532039	-1.02117	0.083	0.117	1	AC098829.1	COVID-19 induced	Up_in_Control
0.000143897	-1.02064	0.029	0.09	1	PLB1	COVID-19 induced	Up_in_Control
0.00209813	-1.02004	0.125	0.201	1	GFPT2	COVID-19 induced	Up_in_Control
0.0300973	-1.01901	0.022	0.05	1	LINC02757	COVID-19 induced	Up_in_Control
0.000651335	-1.01897	0.038	0.098	1	CELSR1	COVID-19 induced	Up_in_Control
0.00207908	-1.0186	0.125	0.198	1	GNAL	COVID-19 induced	Up_in_Control
0.0337556	-1.01845	0.026	0.058	1	SPNS1	COVID-19 induced	Up_in_Control
0.0277549	-1.01803	0.038	0.076	1	XXYLT1	COVID-19 induced	Up_in_Control
0.00234176	-1.01731	0.048	0.105	1	COX19	COVID-19 induced	Up_in_Control
0.00377174	-1.01649	0.128	0.188	1	OPTN	COVID-19 induced	Up_in_Control
0.050403	-1.01614	0.064	0.103	1	ZNF266	COVID-19 induced	Up_in_Control
0.000319571	-1.01613	0.061	0.134	1	ACACB	COVID-19 induced	Up_in_Control
0.0157634	-1.01591	0.106	0.145	1	SPICE1	COVID-19 induced	Up_in_Control
0.0170348	-1.01571	0.019	0.052	1	LTO1	COVID-19 induced	Up_in_Control
1.64774e-05	-1.01544	0.183	0.279	0.588126	TACC3	COVID-19 induced	Up_in_Control
5.57844e-05	-1.01412	0.115	0.216	1	MAP7D2	COVID-19 induced	Up_in_Control
0.017004	-1.01407	0.061	0.109	1	LINC01002	COVID-19 induced	Up_in_Control
7.05317e-06	-1.01275	0.215	0.319	0.251749	MAD1L1	COVID-19 induced	Up_in_Control
0.302639	-1.01269	0.051	0.068	1	EPB42	COVID-19 induced	Up_in_Control
0.104639	-1.01255	0.064	0.095	1	POLA2	COVID-19 induced	Up_in_Control
0.000157536	-1.01203	0.096	0.186	1	NRXN2	COVID-19 induced	Up_in_Control
0.000672355	-1.01194	0.138	0.219	1	CKAP2	COVID-19 induced	Up_in_Control
5.49638e-07	-1.01162	0.192	0.331	0.0196182	CRAMP1	COVID-19 induced	Up_in_Control
0.0278123	-1.0115	0.083	0.131	1	POLR1A	COVID-19 induced	Up_in_Control
0.00017192	-1.01058	0.054	0.126	1	KDM6B	COVID-19 induced	Up_in_Control
0.00217677	-1.00972	0.029	0.076	1	ABLIM2	COVID-19 induced	Up_in_Control
0.00272831	-1.00935	0.019	0.057	1	AC087564.1	COVID-19 induced	Up_in_Control
0.00643501	-1.00919	0.026	0.065	1	MATN2	COVID-19 induced	Up_in_Control
0.00369328	-1.0083	0.135	0.2	1	MBD4	COVID-19 induced	Up_in_Control
0.326443	-1.00804	0.051	0.064	1	CCDC151	COVID-19 induced	Up_in_Control
0.0011264	-1.00791	0.029	0.079	1	TBC1D17	COVID-19 induced	Up_in_Control
0.000672154	-1.00761	0.026	0.076	1	RELB	COVID-19 induced	Up_in_Control
0.00973086	-1.00756	0.029	0.068	1	GABRB2	COVID-19 induced	Up_in_Control
0.0874863	-1.00728	0.038	0.069	1	UFC1	COVID-19 induced	Up_in_Control
0.181355	-1.00718	0.029	0.05	1	TAFA4	COVID-19 induced	Up_in_Control
0.0250319	-1.00685	0.035	0.073	1	LINC00861	COVID-19 induced	Up_in_Control
1.17636e-06	-1.00661	0.26	0.385	0.0419877	SMC1B	COVID-19 induced	Up_in_Control
0.1513	-1.00654	0.042	0.067	1	IMPDH2	COVID-19 induced	Up_in_Control
0.000378574	-1.00639	0.058	0.129	1	SYTL2	COVID-19 induced	Up_in_Control
0.0013972	-1.00616	0.096	0.168	1	AL008633.1	COVID-19 induced	Up_in_Control
0.0023772	-1.00606	0.074	0.138	1	LINC00159	COVID-19 induced	Up_in_Control
0.10476	-1.00603	0.048	0.079	1	ZNF267	COVID-19 induced	Up_in_Control
0.107783	-1.00481	0.087	0.118	1	MELTF-AS1	COVID-19 induced	Up_in_Control
2.2404e-06	-1.00469	0.087	0.195	0.0799664	FGD6	COVID-19 induced	Up_in_Control
0.0763479	-1.00421	0.051	0.085	1	HJURP	COVID-19 induced	Up_in_Control
0.0590676	-1.00407	0.022	0.05	1	VCAN	COVID-19 induced	Up_in_Control
0.222389	-1.00398	0.058	0.083	1	AC068286.2	COVID-19 induced	Up_in_Control
0.00501323	-1.00397	0.064	0.12	1	DDX31	COVID-19 induced	Up_in_Control
1.3094e-06	-1.00387	0.115	0.236	0.0467363	UBE2G2	COVID-19 induced	Up_in_Control
1.38637e-06	-1.00361	0.163	0.288	0.0494836	APTX	COVID-19 induced	Up_in_Control
0.101817	-1.00326	0.042	0.071	1	LINC01435	COVID-19 induced	Up_in_Control
0.0612417	-1.0027	0.038	0.07	1	ADCY5	COVID-19 induced	Up_in_Control
0.151986	-1.00267	0.032	0.056	1	ANKZF1	COVID-19 induced	Up_in_Control
7.01842e-05	-1.00212	0.026	0.085	1	NOP14	COVID-19 induced	Up_in_Control
7.9053e-11	-1.00134	0.215	0.401	2.82164e-06	DNAJA1	COVID-19 induced	Up_in_Control
0.00226319	-1.001	0.022	0.066	1	SVEP1	COVID-19 induced	Up_in_Control
0.00913311	-1.0008	0.035	0.077	1	ZNF436	COVID-19 induced	Up_in_Control
5.30159e-06	-1.00071	0.125	0.238	0.18923	HNRNPUL1	COVID-19 induced	Up_in_Control
0.127585	-1.00042	0.061	0.093	1	COA8	COVID-19 induced	Up_in_Control
0.0293313	-1.00027	0.064	0.109	1	DCUN1D5	COVID-19 induced	Up_in_Control
9.58597e-05	-0.999328	0.167	0.244	1	CYLD	COVID-19 induced	Up_in_Control
0.00737713	-0.998806	0.09	0.148	1	ZNF394	COVID-19 induced	Up_in_Control
0.000611079	-0.998286	0.099	0.179	1	USP4	COVID-19 induced	Up_in_Control
2.26471e-06	-0.997719	0.16	0.288	0.0808345	SIPA1L3	COVID-19 induced	Up_in_Control
7.20304e-05	-0.997571	0.013	0.06	1	TINCR	COVID-19 induced	Up_in_Control
0.00688575	-0.996807	0.038	0.085	1	ZNF329	COVID-19 induced	Up_in_Control
0.0927417	-0.996624	0.054	0.084	1	WDR89	COVID-19 induced	Up_in_Control
0.00670518	-0.996505	0.138	0.189	1	MROH1	COVID-19 induced	Up_in_Control
0.00189902	-0.994603	0.112	0.181	1	ERC2	COVID-19 induced	Up_in_Control
0.0129813	-0.994379	0.048	0.095	1	RBBP5	COVID-19 induced	Up_in_Control
0.0807719	-0.994371	0.035	0.064	1	ZIM2	COVID-19 induced	Up_in_Control
0.0280938	-0.994249	0.029	0.063	1	RXRA	COVID-19 induced	Up_in_Control
0.123326	-0.994072	0.058	0.088	1	ZNF184	COVID-19 induced	Up_in_Control
2.00965e-12	-0.993852	0.308	0.482	7.17304e-08	MED13	COVID-19 induced	Up_in_Control
0.484564	-0.992801	0.038	0.05	1	AL021707.1	COVID-19 induced	Up_in_Control
0.0039787	-0.992493	0.301	0.309	1	HIST1H2BA	COVID-19 induced	Up_in_Control
0.03271	-0.992212	0.035	0.07	1	GNG4	COVID-19 induced	Up_in_Control
0.0891171	-0.991494	0.045	0.075	1	TEK	COVID-19 induced	Up_in_Control
0.00050678	-0.990571	0.128	0.212	1	SEC16A	COVID-19 induced	Up_in_Control
0.217113	-0.990511	0.038	0.059	1	BNIP3	COVID-19 induced	Up_in_Control
8.03146e-05	-0.990477	0.154	0.254	1	VPS35	COVID-19 induced	Up_in_Control
0.000285501	-0.990306	0.096	0.182	1	DDX3X	COVID-19 induced	Up_in_Control
0.0335598	-0.989926	0.035	0.069	1	AL157388.1	COVID-19 induced	Up_in_Control
0.0410167	-0.989349	0.083	0.129	1	RNF220	COVID-19 induced	Up_in_Control
0.0350562	-0.988402	0.051	0.088	1	FBXO47	COVID-19 induced	Up_in_Control
0.000142506	-0.98815	0.192	0.295	1	PABPC4	COVID-19 induced	Up_in_Control
5.89163e-06	-0.987219	0.125	0.241	0.21029	ZNF507	COVID-19 induced	Up_in_Control
0.00103607	-0.985237	0.042	0.1	1	RAB11FIP4	COVID-19 induced	Up_in_Control
0.0164428	-0.985184	0.026	0.061	1	RGPD8	COVID-19 induced	Up_in_Control
0.000949846	-0.985178	0.138	0.218	1	SP1	COVID-19 induced	Up_in_Control
0.465645	-0.984638	0.048	0.056	1	C10orf143	COVID-19 induced	Up_in_Control
0.472628	-0.984195	0.038	0.052	1	RWDD2A	COVID-19 induced	Up_in_Control
0.00112229	-0.98378	0.064	0.131	1	COX10-AS1	COVID-19 induced	Up_in_Control
9.99057e-05	-0.983753	0.279	0.34	1	CCDC158	COVID-19 induced	Up_in_Control
0.00330637	-0.982589	0.048	0.103	1	ZNF226	COVID-19 induced	Up_in_Control
0.108088	-0.982192	0.077	0.086	1	BASP1-AS1	COVID-19 induced	Up_in_Control
0.000584248	-0.981634	0.083	0.161	1	KDM2B	COVID-19 induced	Up_in_Control
0.00210782	-0.981551	0.167	0.231	1	DGKD	COVID-19 induced	Up_in_Control
0.00111532	-0.981474	0.045	0.105	1	ZNF470	COVID-19 induced	Up_in_Control
9.49094e-09	-0.980614	0.308	0.463	0.00033876	BTAF1	COVID-19 induced	Up_in_Control
0.101801	-0.979854	0.038	0.067	1	EMC9	COVID-19 induced	Up_in_Control
2.0967e-05	-0.979741	0.125	0.232	0.748374	GTF3C3	COVID-19 induced	Up_in_Control
0.00177346	-0.979221	0.061	0.124	1	ZNF621	COVID-19 induced	Up_in_Control
2.93581e-12	-0.979151	0.256	0.463	1.04788e-07	FAM193A	COVID-19 induced	Up_in_Control
0.0183514	-0.977878	0.067	0.112	1	PRKCH	COVID-19 induced	Up_in_Control
1.26494e-05	-0.976966	0.154	0.265	0.451496	DHX40	COVID-19 induced	Up_in_Control
5.11437e-06	-0.97649	0.141	0.259	0.182547	SLK	COVID-19 induced	Up_in_Control
0.000578847	-0.975935	0.147	0.225	1	XPO5	COVID-19 induced	Up_in_Control
2.84241e-08	-0.974851	0.128	0.273	0.00101454	SLC5A3	COVID-19 induced	Up_in_Control
1.61502e-06	-0.974623	0.096	0.211	0.0576448	SF3B3	COVID-19 induced	Up_in_Control
3.49759e-06	-0.974615	0.208	0.332	0.124839	SMC2	COVID-19 induced	Up_in_Control
0.000231452	-0.974589	0.141	0.232	1	FGD5-AS1	COVID-19 induced	Up_in_Control
0.274472	-0.974578	0.042	0.062	1	FAM9B	COVID-19 induced	Up_in_Control
9.35099e-06	-0.974155	0.26	0.373	0.333765	CKAP5	COVID-19 induced	Up_in_Control
0.0322606	-0.974126	0.051	0.093	1	NRBF2	COVID-19 induced	Up_in_Control
0.00210029	-0.973903	0.051	0.11	1	NELFB	COVID-19 induced	Up_in_Control
0.0746669	-0.973047	0.035	0.066	1	LIN37	COVID-19 induced	Up_in_Control
0.0815883	-0.972336	0.071	0.107	1	RIMBP2	COVID-19 induced	Up_in_Control
0.000263791	-0.971498	0.099	0.186	1	LINC01257	COVID-19 induced	Up_in_Control
1.76615e-06	-0.971481	0.151	0.276	0.063039	STAG2	COVID-19 induced	Up_in_Control
0.0420725	-0.971474	0.096	0.135	1	PDPR	COVID-19 induced	Up_in_Control
8.83977e-05	-0.971294	0.038	0.107	1	VOPP1	COVID-19 induced	Up_in_Control
0.0551466	-0.970902	0.087	0.116	1	TTC25	COVID-19 induced	Up_in_Control
0.0889563	-0.970719	0.035	0.064	1	THAP3	COVID-19 induced	Up_in_Control
0.000223824	-0.97056	0.064	0.141	1	ZNF586	COVID-19 induced	Up_in_Control
9.62148e-05	-0.970468	0.192	0.279	1	USP6	COVID-19 induced	Up_in_Control
0.00304868	-0.970103	0.048	0.104	1	ZNF69	COVID-19 induced	Up_in_Control
0.00551831	-0.969629	0.071	0.13	1	ADCY9	COVID-19 induced	Up_in_Control
0.0303346	-0.969595	0.035	0.071	1	HMGA1	COVID-19 induced	Up_in_Control
0.00072557	-0.969474	0.112	0.196	1	GARNL3	COVID-19 induced	Up_in_Control
0.0112303	-0.969036	0.08	0.135	1	IRF3	COVID-19 induced	Up_in_Control
0.0166812	-0.968926	0.042	0.084	1	DDX19A	COVID-19 induced	Up_in_Control
1.15182e-05	-0.968529	0.125	0.237	0.411118	NCBP3	COVID-19 induced	Up_in_Control
5.82597e-05	-0.967605	0.09	0.182	1	RAC1	COVID-19 induced	Up_in_Control
0.0452838	-0.967443	0.054	0.093	1	HMG20B	COVID-19 induced	Up_in_Control
0.204636	-0.967358	0.058	0.059	1	AC090365.1	COVID-19 induced	Up_in_Control
0.000933979	-0.967207	0.064	0.132	1	ZNF35	COVID-19 induced	Up_in_Control
0.00513052	-0.964405	0.048	0.101	1	ZNF430	COVID-19 induced	Up_in_Control
6.24525e-09	-0.964272	0.128	0.28	0.000222912	EIF3B	COVID-19 induced	Up_in_Control
0.00042656	-0.964177	0.071	0.146	1	PLK4	COVID-19 induced	Up_in_Control
0.0424134	-0.964127	0.048	0.086	1	RPF1	COVID-19 induced	Up_in_Control
0.308259	-0.96359	0.051	0.071	1	CENPO	COVID-19 induced	Up_in_Control
2.55203e-11	-0.963295	0.417	0.565	9.10897e-07	SFPQ	COVID-19 induced	Up_in_Control
0.0321947	-0.961461	0.051	0.093	1	DLG5	COVID-19 induced	Up_in_Control
2.23395e-06	-0.960773	0.144	0.26	0.0797363	HIP1	COVID-19 induced	Up_in_Control
0.0120042	-0.960393	0.026	0.061	1	ZBTB34	COVID-19 induced	Up_in_Control
7.00913e-11	-0.957758	0.401	0.564	2.50177e-06	RB1CC1	COVID-19 induced	Up_in_Control
0.104504	-0.956115	0.035	0.063	1	DAPK2	COVID-19 induced	Up_in_Control
0.210368	-0.955406	0.058	0.069	1	KCNH5	COVID-19 induced	Up_in_Control
0.0513964	-0.954529	0.029	0.059	1	LINC01411	COVID-19 induced	Up_in_Control
0.044945	-0.954276	0.051	0.09	1	MCL1	COVID-19 induced	Up_in_Control
0.0150698	-0.953986	0.029	0.067	1	STX3	COVID-19 induced	Up_in_Control
0.361638	-0.953917	0.038	0.052	1	OVOL2	COVID-19 induced	Up_in_Control
0.00866791	-0.953565	0.074	0.131	1	EXTL3	COVID-19 induced	Up_in_Control
0.131476	-0.952715	0.029	0.053	1	AKR1D1	COVID-19 induced	Up_in_Control
0.1218	-0.952423	0.051	0.077	1	PGBD1	COVID-19 induced	Up_in_Control
0.00754847	-0.951979	0.269	0.3	1	CFAP46	COVID-19 induced	Up_in_Control
0.000122892	-0.950596	0.202	0.293	1	HOOK3	COVID-19 induced	Up_in_Control
0.000331551	-0.948804	0.08	0.16	1	ABHD3	COVID-19 induced	Up_in_Control
0.0599264	-0.948495	0.022	0.05	1	YIF1B	COVID-19 induced	Up_in_Control
0.0091273	-0.948005	0.026	0.064	1	CNTNAP3	COVID-19 induced	Up_in_Control
0.0574759	-0.947797	0.103	0.137	1	IQCA1	COVID-19 induced	Up_in_Control
0.0240129	-0.947267	0.115	0.148	1	HIST1H2BJ	COVID-19 induced	Up_in_Control
0.0045606	-0.946513	0.103	0.162	1	ZNF398	COVID-19 induced	Up_in_Control
0.00194994	-0.946262	0.016	0.053	1	EIF2B5	COVID-19 induced	Up_in_Control
8.97011e-07	-0.94626	0.24	0.37	0.032017	CANX	COVID-19 induced	Up_in_Control
0.000105296	-0.945798	0.196	0.298	1	HSPA2	COVID-19 induced	Up_in_Control
0.00299027	-0.945632	0.058	0.116	1	NMNAT1	COVID-19 induced	Up_in_Control
0.00119588	-0.945287	0.019	0.061	1	CORO2B	COVID-19 induced	Up_in_Control
9.59866e-05	-0.944991	0.038	0.105	1	KLHL25	COVID-19 induced	Up_in_Control
0.125994	-0.94448	0.09	0.123	1	AP1B1	COVID-19 induced	Up_in_Control
2.99413e-05	-0.944207	0.026	0.085	1	SCAMP3	COVID-19 induced	Up_in_Control
0.0122613	-0.944181	0.048	0.095	1	MOB3A	COVID-19 induced	Up_in_Control
0.233678	-0.943134	0.061	0.079	1	GNAS-AS1	COVID-19 induced	Up_in_Control
0.035666	-0.943023	0.09	0.132	1	ZNF99	COVID-19 induced	Up_in_Control
0.0913294	-0.9424	0.035	0.064	1	SAMM50	COVID-19 induced	Up_in_Control
1.25643e-08	-0.941532	0.333	0.426	0.000448456	BRD8	COVID-19 induced	Up_in_Control
0.0122629	-0.941514	0.051	0.099	1	ZNF555	COVID-19 induced	Up_in_Control
0.088121	-0.941478	0.071	0.093	1	PRDM4	COVID-19 induced	Up_in_Control
0.000212089	-0.941467	0.074	0.153	1	COPB2	COVID-19 induced	Up_in_Control
1.37311e-05	-0.941078	0.026	0.092	0.490103	GNPTG	COVID-19 induced	Up_in_Control
3.20667e-05	-0.940576	0.071	0.159	1	FMR1	COVID-19 induced	Up_in_Control
0.0390167	-0.94026	0.054	0.087	1	ST8SIA1	COVID-19 induced	Up_in_Control
0.469736	-0.939882	0.058	0.064	1	LINC00504	COVID-19 induced	Up_in_Control
0.0276259	-0.939479	0.064	0.11	1	ABCF2	COVID-19 induced	Up_in_Control
0.146711	-0.939257	0.054	0.08	1	TMEM39B	COVID-19 induced	Up_in_Control
0.186502	-0.938755	0.038	0.062	1	GLOD4	COVID-19 induced	Up_in_Control
0.0267092	-0.938375	0.051	0.094	1	NBR2	COVID-19 induced	Up_in_Control
0.000653486	-0.937875	0.048	0.112	1	HCN1	COVID-19 induced	Up_in_Control
0.000116648	-0.937687	0.138	0.237	1	IQGAP1	COVID-19 induced	Up_in_Control
5.93249e-07	-0.937279	0.311	0.445	0.0211748	HERC1	COVID-19 induced	Up_in_Control
0.00429094	-0.937277	0.026	0.066	1	MRC1	COVID-19 induced	Up_in_Control
0.00013369	-0.936611	0.282	0.355	1	KCNQ1OT1	COVID-19 induced	Up_in_Control
0.00927016	-0.936496	0.141	0.198	1	SCN11A	COVID-19 induced	Up_in_Control
3.83431e-06	-0.936447	0.151	0.274	0.136858	BRD9	COVID-19 induced	Up_in_Control
0.150052	-0.936084	0.035	0.059	1	SNTB1	COVID-19 induced	Up_in_Control
0.00483872	-0.935623	0.071	0.131	1	HSF1	COVID-19 induced	Up_in_Control
0.089178	-0.935472	0.032	0.06	1	NLN	COVID-19 induced	Up_in_Control
1.03731e-13	-0.935151	0.42	0.598	3.70248e-09	ARID4B	COVID-19 induced	Up_in_Control
0.0870627	-0.935151	0.077	0.112	1	NFU1	COVID-19 induced	Up_in_Control
0.241585	-0.93473	0.035	0.057	1	IL4I1	COVID-19 induced	Up_in_Control
0.0312824	-0.933928	0.029	0.062	1	AL355075.4	COVID-19 induced	Up_in_Control
0.108256	-0.933739	0.067	0.074	1	PAK4	COVID-19 induced	Up_in_Control
5.48821e-10	-0.932343	0.144	0.311	1.95891e-05	THOC2	COVID-19 induced	Up_in_Control
5.60698e-10	-0.932146	0.324	0.502	2.0013e-05	SPECC1L	COVID-19 induced	Up_in_Control
0.0151692	-0.931997	0.093	0.139	1	NRCAM	COVID-19 induced	Up_in_Control
0.0374366	-0.931775	0.122	0.16	1	FBF1	COVID-19 induced	Up_in_Control
1.10081e-05	-0.931738	0.244	0.36	0.392911	RNF130	COVID-19 induced	Up_in_Control
7.41178e-06	-0.931337	0.045	0.123	0.264549	GDI1	COVID-19 induced	Up_in_Control
0.130026	-0.931331	0.099	0.121	1	DNAH2	COVID-19 induced	Up_in_Control
0.0159777	-0.930998	0.051	0.097	1	GRIK4	COVID-19 induced	Up_in_Control
0.000786729	-0.930169	0.096	0.175	1	PCYT1A	COVID-19 induced	Up_in_Control
4.61188e-06	-0.930065	0.077	0.178	0.164612	ABCC5	COVID-19 induced	Up_in_Control
0.028454	-0.930036	0.087	0.136	1	TIGAR	COVID-19 induced	Up_in_Control
0.0112467	-0.929561	0.061	0.113	1	FCGRT	COVID-19 induced	Up_in_Control
0.000411401	-0.928786	0.038	0.098	1	AGFG2	COVID-19 induced	Up_in_Control
0.00479401	-0.928673	0.048	0.101	1	NIFK	COVID-19 induced	Up_in_Control
1.55239e-05	-0.928562	0.157	0.259	0.554096	RUBCN	COVID-19 induced	Up_in_Control
1.5203e-10	-0.927866	0.413	0.547	5.4264e-06	KIAA1109	COVID-19 induced	Up_in_Control
0.00625828	-0.927649	0.058	0.112	1	SGSM1	COVID-19 induced	Up_in_Control
0.000540417	-0.927644	0.199	0.282	1	CDR2	COVID-19 induced	Up_in_Control
0.000136909	-0.92721	0.067	0.148	1	LINC01505	COVID-19 induced	Up_in_Control
0.141514	-0.927181	0.051	0.052	1	DDX58	COVID-19 induced	Up_in_Control
0.00333872	-0.926923	0.106	0.177	1	WBP4	COVID-19 induced	Up_in_Control
9.56034e-05	-0.926674	0.141	0.242	1	SRCAP	COVID-19 induced	Up_in_Control
0.000301102	-0.926176	0.151	0.242	1	DHX29	COVID-19 induced	Up_in_Control
0.00103795	-0.926154	0.106	0.185	1	RPAP3	COVID-19 induced	Up_in_Control
1.87867e-05	-0.925978	0.157	0.273	0.670555	TARDBP	COVID-19 induced	Up_in_Control
4.32242e-05	-0.925546	0.119	0.22	1	CHORDC1	COVID-19 induced	Up_in_Control
8.04229e-05	-0.925445	0.212	0.321	1	TULP4	COVID-19 induced	Up_in_Control
3.54699e-05	-0.925319	0.045	0.119	1	POLR3C	COVID-19 induced	Up_in_Control
0.000622008	-0.924752	0.163	0.248	1	KIAA0753	COVID-19 induced	Up_in_Control
0.496448	-0.924016	0.048	0.052	1	MSL3	COVID-19 induced	Up_in_Control
0.00402015	-0.92322	0.167	0.235	1	PCDH15	COVID-19 induced	Up_in_Control
0.000642753	-0.923075	0.119	0.204	1	PPP4C	COVID-19 induced	Up_in_Control
0.0239002	-0.923008	0.058	0.102	1	TRMT44	COVID-19 induced	Up_in_Control
0.167038	-0.922686	0.064	0.075	1	DOCK2	COVID-19 induced	Up_in_Control
0.015302	-0.922094	0.054	0.102	1	TLE3	COVID-19 induced	Up_in_Control
0.000237203	-0.921194	0.074	0.153	1	RPL7L1	COVID-19 induced	Up_in_Control
0.0715985	-0.921173	0.093	0.099	1	AC007448.5	COVID-19 induced	Up_in_Control
0.00153187	-0.920899	0.173	0.163	1	RPL39L	COVID-19 induced	Up_in_Control
1.19994e-09	-0.920799	0.029	0.121	4.28293e-05	HSPB1	COVID-19 induced	Up_in_Control
0.000439583	-0.920043	0.215	0.299	1	AC092683.1	COVID-19 induced	Up_in_Control
2.3357e-12	-0.919783	0.484	0.613	8.33682e-08	SETD2	COVID-19 induced	Up_in_Control
0.000108164	-0.919446	0.119	0.216	1	PITPNA	COVID-19 induced	Up_in_Control
6.07033e-05	-0.919409	0.215	0.306	1	GLYR1	COVID-19 induced	Up_in_Control
3.08687e-06	-0.919142	0.125	0.244	0.11018	GGA2	COVID-19 induced	Up_in_Control
0.00441467	-0.919019	0.022	0.062	1	TMC5	COVID-19 induced	Up_in_Control
0.0119901	-0.918691	0.099	0.149	1	COL26A1	COVID-19 induced	Up_in_Control
0.00817324	-0.918479	0.045	0.093	1	C15orf40	COVID-19 induced	Up_in_Control
0.264771	-0.918426	0.045	0.063	1	AC183088.3	COVID-19 induced	Up_in_Control
1.6381e-05	-0.918175	0.308	0.421	0.584686	HDLBP	COVID-19 induced	Up_in_Control
0.00570772	-0.918071	0.122	0.176	1	MCM3AP-AS1	COVID-19 induced	Up_in_Control
1.86197e-06	-0.917623	0.25	0.329	0.0664594	ZCWPW1	COVID-19 induced	Up_in_Control
0.299935	-0.917574	0.064	0.082	1	AC009081.2	COVID-19 induced	Up_in_Control
2.40548e-08	-0.916879	0.321	0.473	0.000858589	PIP5K1A	COVID-19 induced	Up_in_Control
[truncated: 121,617 more rows]

## Sheet: S.Table 5b. Significant_DEGs
cluster	gene	avg_log2FC	pct.1	pct.2	p_val	p_val_adj
Elongated spermatids	HIST1H2AA	5.78005	0.424	0.011	3.71043e-180	1.32436e-175
Elongated spermatids	CAVIN4	5.6237	0.111	0.002	4.33074e-40	1.54577e-35
Elongated spermatids	LY6K	5.26843	0.126	0.006	7.00927e-43	2.50182e-38
Elongated spermatids	H2AFZ	4.51266	0.134	0.007	4.41353e-43	1.57532e-38
Elongated spermatids	TUBA3C	4.49437	0.213	0.01	8.60519e-73	3.07145e-68
Elongated spermatids	RPS17	4.46526	0.166	0.006	9.2073e-57	3.28636e-52
Elongated spermatids	SYCE1	4.15276	0.123	0.006	2.06711e-39	7.37814e-35
Elongated spermatids	RPS21	4.08528	0.244	0.012	1.69946e-84	6.06589e-80
Elongated spermatids	HIST1H4C	4.04572	0.202	0.016	1.70103e-61	6.0715e-57
Elongated spermatids	RPL39	3.98722	0.119	0.01	2.66877e-34	9.52566e-30
Elongated spermatids	CD81	3.85235	0.135	0.007	4.08939e-43	1.45963e-38
Elongated spermatids	RNASE1	3.84668	0.353	0.026	2.16821e-120	7.73898e-116
Elongated spermatids	SRP14	3.84422	0.22	0.018	8.36806e-67	2.98681e-62
Elongated spermatids	RPLP1	3.84292	0.447	0.03	9.05118e-167	3.23064e-162
Elongated spermatids	RPL21	3.77309	0.184	0.011	2.45429e-59	8.76009e-55
Elongated spermatids	RBM46	3.74005	0.178	0.012	1.11498e-55	3.97971e-51
Elongated spermatids	SEC61G	3.69777	0.12	0.009	1.13454e-35	4.04952e-31
Elongated spermatids	HINT1	3.68362	0.175	0.016	4.35248e-50	1.55353e-45
Elongated spermatids	KRBOX1	3.67016	0.16	0.012	6.27554e-48	2.23993e-43
Elongated spermatids	SNHG27	3.6451	0.293	0.022	1.63385e-94	5.8317e-90
Elongated spermatids	AL133499.1	3.61181	0.151	0.013	1.27481e-43	4.55019e-39
Elongated spermatids	FMC1	3.5882	0.156	0.013	2.22656e-45	7.94726e-41
Elongated spermatids	LRWD1	3.52731	0.161	0.013	3.14156e-47	1.12132e-42
Elongated spermatids	RPL18A	3.51455	0.115	0.009	9.52487e-34	3.39971e-29
Elongated spermatids	C5orf58	3.48215	0.321	0.03	1.32122e-99	4.71583e-95
Elongated spermatids	RBAKDN	3.45278	0.389	0.034	1.12169e-129	4.00363e-125
Elongated spermatids	CETN3	3.44677	0.195	0.018	6.20383e-56	2.21433e-51
Elongated spermatids	UBL5	3.44063	0.18	0.013	1.57163e-55	5.60963e-51
Elongated spermatids	GIHCG	3.40038	0.21	0.02	7.09289e-60	2.53167e-55
Elongated spermatids	CD164	3.36442	0.159	0.012	2.71786e-48	9.70087e-44
Elongated spermatids	AC092683.1	3.33835	0.102	0.009	4.57442e-29	1.63275e-24
Elongated spermatids	COX17	3.3003	0.109	0.012	1.97913e-28	7.06413e-24
Elongated spermatids	COX20	3.28628	0.106	0.006	4.0769e-33	1.45517e-28
Elongated spermatids	EPPIN	3.28627	0.142	0.009	8.61461e-46	3.07481e-41
Elongated spermatids	COX5B	3.2558	0.117	0.012	1.46362e-31	5.2241e-27
Elongated spermatids	NORAD	3.25442	0.122	0.011	1.91733e-34	6.84351e-30
Elongated spermatids	CALM2	3.2525	0.487	0.05	1.92896e-167	6.88504e-163
Elongated spermatids	ROMO1	3.24515	0.133	0.012	1.71614e-37	6.12543e-33
Elongated spermatids	NDUFB4	3.21485	0.126	0.011	5.73925e-36	2.04851e-31
Elongated spermatids	HLTF	3.18469	0.212	0.019	4.50901e-62	1.6094e-57
Elongated spermatids	GOLGA8B	3.16082	0.154	0.013	9.94649e-45	3.5502e-40
Elongated spermatids	LINC02367	3.13528	0.137	0.012	1.15762e-39	4.1319e-35
Elongated spermatids	DMTF1	3.12927	0.235	0.02	9.86156e-71	3.51989e-66
Elongated spermatids	AC002467.1	3.11292	0.108	0.012	4.98879e-28	1.78065e-23
Elongated spermatids	TUBB4B	3.0906	0.388	0.042	2.96336e-121	1.05771e-116
Elongated spermatids	KRTCAP2	3.08109	0.145	0.017	2.49172e-37	8.89368e-33
Elongated spermatids	RPS28	3.07456	0.288	0.028	7.48026e-87	2.66993e-82
Elongated spermatids	HNRNPH3	3.06942	0.172	0.013	2.65227e-52	9.46674e-48
Elongated spermatids	CCT5	3.06711	0.126	0.016	6.82595e-31	2.43639e-26
Elongated spermatids	RPL36AL	3.06329	0.15	0.017	6.34041e-39	2.26308e-34
Elongated spermatids	MARCKSL1	3.0257	0.116	0.009	3.20849e-35	1.14521e-30
Elongated spermatids	COX7A2	3.00077	0.37	0.042	1.569e-112	5.60023e-108
Elongated spermatids	RPL18	2.97758	0.193	0.018	1.17683e-55	4.20047e-51
Elongated spermatids	NDUFB2	2.95216	0.21	0.022	1.96665e-58	7.01956e-54
Elongated spermatids	RPSA	2.94427	0.181	0.019	1.44546e-49	5.15929e-45
Elongated spermatids	HIST1H2BA	2.93557	0.329	0.03	7.01523e-105	2.50395e-100
Elongated spermatids	HSPA2	2.93476	0.172	0.021	9.55347e-44	3.40992e-39
Elongated spermatids	COX7C	2.92972	0.222	0.022	9.42529e-64	3.36417e-59
Elongated spermatids	DRAP1	2.91976	0.107	0.012	6.65209e-28	2.37433e-23
Elongated spermatids	RAN	2.89606	0.155	0.019	5.26435e-39	1.87901e-34
Elongated spermatids	SLC25A36	2.886	0.152	0.017	4.56951e-40	1.631e-35
Elongated spermatids	REXO2	2.87907	0.103	0.013	1.91395e-25	6.83146e-21
Elongated spermatids	BOLL	2.85943	0.103	0.014	1.79737e-24	6.41535e-20
Elongated spermatids	REXO5	2.84823	0.246	0.03	1.79748e-66	6.41575e-62
Elongated spermatids	IMMP1L	2.84742	0.117	0.011	5.0017e-33	1.78526e-28
Elongated spermatids	H2AFJ	2.84248	0.437	0.059	8.61535e-131	3.07508e-126
Elongated spermatids	RNFT1	2.83058	0.168	0.015	5.44868e-49	1.9448e-44
Elongated spermatids	AL390860.1	2.82263	0.122	0.013	1.02467e-32	3.65737e-28
Elongated spermatids	GNG5	2.80845	0.129	0.017	1.77144e-31	6.32279e-27
Elongated spermatids	PTGDS	2.80699	0.531	0.071	5.61573e-174	2.00442e-169
Elongated spermatids	LINC01206	2.802	0.251	0.033	9.68395e-66	3.45649e-61
Elongated spermatids	COX6A1	2.79381	0.123	0.018	1.98879e-28	7.0986e-24
Elongated spermatids	HMGN2	2.7856	0.155	0.021	1.42383e-37	5.08209e-33
Elongated spermatids	NPM1	2.78169	0.217	0.025	5.75143e-60	2.05286e-55
Elongated spermatids	NRARP	2.77862	0.299	0.042	9.87054e-79	3.52309e-74
Elongated spermatids	SUPT20H	2.77649	0.15	0.018	1.65304e-38	5.90021e-34
Elongated spermatids	GOLGA8A	2.77284	0.155	0.015	3.26204e-44	1.16432e-39
Elongated spermatids	NAF1	2.76	0.225	0.02	7.01122e-69	2.50252e-64
Elongated spermatids	ORMDL1	2.75127	0.103	0.011	6.09138e-28	2.1742e-23
Elongated spermatids	NABP1	2.74649	0.211	0.026	2.02617e-56	7.23202e-52
Elongated spermatids	RBM26	2.74359	0.362	0.047	9.83794e-104	3.51146e-99
Elongated spermatids	CPEB2-DT	2.73425	0.203	0.02	3.1405e-58	1.12094e-53
Elongated spermatids	COX6C	2.73393	0.29	0.032	6.57166e-85	2.34562e-80
Elongated spermatids	SQLE	2.73088	0.134	0.015	3.44238e-35	1.22869e-30
Elongated spermatids	RPS23	2.72545	0.279	0.032	1.13293e-79	4.04378e-75
Elongated spermatids	ATP5IF1	2.72417	0.299	0.035	8.00209e-86	2.85619e-81
Elongated spermatids	DPY19L2	2.71541	0.279	0.036	4.74452e-75	1.69346e-70
Elongated spermatids	CTSD	2.71332	0.109	0.012	5.51959e-29	1.97011e-24
Elongated spermatids	EIF2S1	2.71255	0.129	0.013	8.0219e-36	2.86326e-31
Elongated spermatids	LINC01606	2.69502	0.471	0.056	8.66586e-154	3.09311e-149
Elongated spermatids	PFN4	2.69075	0.118	0.017	1.40157e-27	5.00263e-23
Elongated spermatids	LINC00472	2.68228	0.135	0.016	1.98692e-35	7.09192e-31
Elongated spermatids	CETN1	2.65928	0.187	0.031	5.85402e-42	2.08947e-37
Elongated spermatids	CA8	2.65702	0.197	0.022	7.46115e-55	2.66311e-50
Elongated spermatids	RPS14	2.62757	0.275	0.032	1.7237e-78	6.15241e-74
Elongated spermatids	TDRD6	2.61596	0.159	0.026	1.82171e-35	6.50225e-31
Elongated spermatids	NDUFC1	2.61032	0.181	0.024	4.35229e-46	1.55346e-41
Elongated spermatids	CSNK2B	2.60583	0.103	0.018	2.01243e-21	7.18296e-17
Elongated spermatids	SCML1	2.6021	0.15	0.018	1.10155e-38	3.93176e-34
Elongated spermatids	RPL9	2.59495	0.255	0.032	1.32601e-69	4.73292e-65
Elongated spermatids	FATE1	2.58427	0.129	0.015	2.58574e-34	9.2293e-30
Elongated spermatids	CST3	2.58195	0.377	0.045	8.53842e-115	3.04762e-110
Elongated spermatids	GLIPR1L2	2.58109	0.165	0.021	3.59537e-42	1.28329e-37
Elongated spermatids	PTBP2	2.57763	0.35	0.052	1.30211e-93	4.64763e-89
Elongated spermatids	SERF2	2.57728	0.33	0.047	1.8031e-89	6.43581e-85
Elongated spermatids	SYCP3	2.57618	0.166	0.025	5.25021e-39	1.87396e-34
Elongated spermatids	CHCHD2	2.57398	0.129	0.015	1.54014e-34	5.49722e-30
Elongated spermatids	SRSF11	2.57263	0.353	0.053	1.46001e-93	5.21121e-89
Elongated spermatids	ZDHHC21	2.56767	0.187	0.024	1.93682e-49	6.91309e-45
Elongated spermatids	SELENOS	2.56514	0.133	0.015	1.7905e-35	6.39083e-31
Elongated spermatids	C5orf47	2.55937	0.172	0.024	1.56664e-42	5.59182e-38
Elongated spermatids	LINC01088	2.55415	0.454	0.085	1.14113e-116	4.07302e-112
Elongated spermatids	PTTG1	2.55107	0.108	0.015	9.38872e-26	3.35111e-21
Elongated spermatids	AC126323.2	2.54769	0.171	0.02	5.66071e-47	2.02048e-42
Elongated spermatids	TRMT1L	2.54142	0.115	0.015	2.87474e-28	1.02608e-23
Elongated spermatids	CCDC38	2.541	0.101	0.014	6.24755e-24	2.22994e-19
Elongated spermatids	ATP5MF	2.53004	0.125	0.02	2.59017e-27	9.24508e-23
Elongated spermatids	LYPLAL1	2.5286	0.107	0.012	2.84298e-29	1.01475e-24
Elongated spermatids	RPL23	2.52639	0.172	0.025	1.86545e-41	6.65834e-37
Elongated spermatids	RPS15A	2.52126	0.144	0.018	3.53218e-37	1.26074e-32
Elongated spermatids	ZRANB2	2.52014	0.244	0.033	1.03171e-62	3.68247e-58
Elongated spermatids	SPINK2	2.51241	0.356	0.054	8.27246e-95	2.95269e-90
Elongated spermatids	ZNF711	2.51075	0.105	0.011	1.30144e-29	4.64524e-25
Elongated spermatids	TIPARP	2.50712	0.137	0.019	1.41854e-32	5.06319e-28
Elongated spermatids	RPL24	2.50443	0.227	0.03	6.07897e-60	2.16977e-55
Elongated spermatids	DYNLRB2	2.50327	0.209	0.035	3.41706e-47	1.21965e-42
Elongated spermatids	DUT	2.49397	0.109	0.014	2.96461e-27	1.05816e-22
Elongated spermatids	SPAG6	2.49098	0.204	0.031	7.13995e-49	2.54846e-44
Elongated spermatids	MIR3663HG	2.48249	0.138	0.018	1.0699e-34	3.8188e-30
Elongated spermatids	TIAL1	2.47588	0.116	0.018	3.38405e-26	1.20787e-21
Elongated spermatids	PDCD5	2.46608	0.148	0.025	1.34776e-32	4.81057e-28
Elongated spermatids	TTC14	2.46541	0.124	0.018	2.16208e-29	7.71711e-25
Elongated spermatids	ADAM2	2.46485	0.13	0.019	2.16222e-30	7.7176e-26
Elongated spermatids	ANKRD7	2.46157	0.653	0.113	2.21747e-218	7.91481e-214
Elongated spermatids	NADK2	2.45081	0.115	0.016	8.88898e-28	3.17274e-23
Elongated spermatids	C15orf48	2.44676	0.138	0.019	8.73625e-34	3.11823e-29
Elongated spermatids	RPS18	2.44616	0.288	0.046	5.07115e-71	1.81005e-66
Elongated spermatids	WASL	2.4457	0.157	0.019	1.96925e-41	7.02883e-37
Elongated spermatids	C14orf39	2.44318	0.268	0.042	4.21007e-66	1.5027e-61
Elongated spermatids	POMP	2.44112	0.163	0.028	1.71879e-35	6.13486e-31
Elongated spermatids	CEP44	2.43888	0.147	0.018	1.50943e-38	5.38761e-34
Elongated spermatids	SNHG6	2.4363	0.106	0.018	1.82432e-22	6.51154e-18
Elongated spermatids	TMSB10	2.4339	0.246	0.028	9.07388e-70	3.23874e-65
Elongated spermatids	COL1A2	2.43169	0.209	0.029	9.69539e-54	3.46058e-49
Elongated spermatids	TOMM7	2.4309	0.151	0.022	9.67223e-36	3.45231e-31
Elongated spermatids	NEU3	2.42847	0.111	0.016	1.63463e-26	5.83447e-22
Elongated spermatids	PIWIL1	2.42627	0.181	0.028	4.33702e-43	1.54801e-38
Elongated spermatids	ATP5MD	2.41954	0.109	0.017	1.24812e-24	4.45492e-20
Elongated spermatids	FAU	2.41841	0.226	0.036	2.04614e-53	7.30328e-49
Elongated spermatids	RPS20	2.4173	0.334	0.049	1.08591e-90	3.87593e-86
Elongated spermatids	SPARC	2.41535	0.28	0.042	1.06234e-72	3.7918e-68
Elongated spermatids	TFG	2.41275	0.157	0.018	1.01405e-42	3.61946e-38
Elongated spermatids	DBI	2.40928	0.128	0.018	1.21078e-30	4.32164e-26
Elongated spermatids	SLC6A16	2.40776	0.156	0.021	4.19157e-38	1.4961e-33
Elongated spermatids	RPS16	2.40572	0.195	0.029	1.64043e-47	5.85518e-43
Elongated spermatids	SSBP1	2.39727	0.129	0.019	5.35146e-30	1.9101e-25
Elongated spermatids	FGF14	2.3969	0.424	0.108	9.94337e-87	3.54909e-82
Elongated spermatids	AC016773.1	2.39309	0.101	0.011	2.04541e-28	7.3007e-24
Elongated spermatids	ZSWIM6	2.38622	0.501	0.096	1.3455e-133	4.8025e-129
Elongated spermatids	SOD1	2.38508	0.162	0.025	2.13883e-38	7.63411e-34
Elongated spermatids	CEPT1	2.38491	0.132	0.013	3.33055e-38	1.18877e-33
Elongated spermatids	RPL7A	2.38364	0.324	0.049	7.4991e-85	2.67665e-80
Elongated spermatids	SAYSD1	2.38212	0.108	0.015	5.78412e-26	2.06452e-21
Elongated spermatids	RPL30	2.38165	0.26	0.042	1.11644e-62	3.98491e-58
Elongated spermatids	DDHD1	2.37964	0.393	0.061	2.09946e-107	7.4936e-103
Elongated spermatids	IZUMO4	2.36966	0.208	0.037	1.99491e-45	7.12044e-41
Elongated spermatids	DDX4	2.36836	0.454	0.074	2.54494e-127	9.08365e-123
Elongated spermatids	PSMD2	2.36814	0.104	0.021	1.20565e-19	4.30334e-15
Elongated spermatids	TMEM99	2.3599	0.103	0.016	5.13067e-23	1.83129e-18
Elongated spermatids	RPL35A	2.34741	0.246	0.032	7.67435e-67	2.73921e-62
Elongated spermatids	CMAS	2.34408	0.125	0.016	7.04983e-32	2.51629e-27
Elongated spermatids	ATP5PF	2.33678	0.127	0.021	1.09685e-27	3.915e-23
Elongated spermatids	RPL34	2.33343	0.251	0.038	2.50313e-62	8.93443e-58
Elongated spermatids	UBE2E3	2.33305	0.197	0.029	2.65672e-49	9.48264e-45
Elongated spermatids	KIF3A	2.32486	0.167	0.025	2.27386e-40	8.11609e-36
Elongated spermatids	SCGB2B2	2.32233	0.28	0.051	1.8192e-63	6.49328e-59
Elongated spermatids	DECR1	2.32098	0.111	0.018	1.6297e-24	5.81688e-20
Elongated spermatids	MYEF2	2.32051	0.196	0.024	7.10913e-55	2.53746e-50
Elongated spermatids	RPLP2	2.31472	0.319	0.058	1.93917e-75	6.92149e-71
Elongated spermatids	CCDC14	2.31396	0.256	0.036	8.78676e-68	3.13626e-63
Elongated spermatids	PPM1K	2.31352	0.125	0.018	7.92974e-30	2.83036e-25
Elongated spermatids	NDUFAF3	2.3121	0.168	0.025	4.37868e-41	1.56288e-36
Elongated spermatids	HNRNPA2B1	2.30633	0.392	0.068	2.91663e-100	1.04103e-95
Elongated spermatids	EMC2	2.30506	0.111	0.016	1.6055e-26	5.73049e-22
Elongated spermatids	ZNF546	2.30396	0.197	0.026	4.30695e-52	1.53728e-47
Elongated spermatids	AC136616.1	2.30338	0.142	0.016	3.08195e-39	1.10004e-34
Elongated spermatids	HMGN3	2.30065	0.112	0.013	1.19977e-30	4.28236e-26
Elongated spermatids	RPS27A	2.29876	0.284	0.044	2.24385e-73	8.00898e-69
Elongated spermatids	STRIP2	2.29598	0.114	0.015	7.26994e-30	2.59486e-25
Elongated spermatids	MIR202HG	2.29341	0.262	0.037	9.35088e-69	3.33761e-64
Elongated spermatids	SOWAHC	2.29208	0.11	0.015	3.19348e-27	1.13985e-22
Elongated spermatids	U73166.1	2.29126	0.113	0.014	2.02578e-30	7.2306e-26
Elongated spermatids	ETNK1	2.29108	0.341	0.054	1.35969e-88	4.85314e-84
Elongated spermatids	HMGB2	2.28842	0.152	0.028	6.77077e-32	2.41669e-27
Elongated spermatids	DDX17	2.28665	0.373	0.06	8.79748e-100	3.14009e-95
Elongated spermatids	AC092435.2	2.28466	0.111	0.017	5.60708e-26	2.00133e-21
Elongated spermatids	PRDX1	2.27756	0.114	0.013	1.6202e-31	5.78298e-27
Elongated spermatids	MAFG	2.27601	0.256	0.042	3.7605e-62	1.34223e-57
Elongated spermatids	RPL15	2.27297	0.391	0.061	3.70507e-108	1.32245e-103
Elongated spermatids	DYNC1I2	2.26606	0.187	0.029	3.83854e-45	1.37009e-40
Elongated spermatids	FAM106A	2.26099	0.18	0.027	1.18368e-44	4.2249e-40
Elongated spermatids	SS18	2.2564	0.281	0.047	7.6159e-68	2.71834e-63
Elongated spermatids	FANCL	2.25634	0.146	0.017	4.75943e-40	1.69878e-35
Elongated spermatids	ZFAND3	2.24819	0.707	0.226	2.97677e-179	1.0625e-174
Elongated spermatids	CCDC15	2.24679	0.132	0.021	1.8412e-29	6.57178e-25
Elongated spermatids	DZIP3	2.24664	0.243	0.034	1.88102e-63	6.71394e-59
Elongated spermatids	CNBP	2.24573	0.105	0.017	2.01971e-23	7.20894e-19
Elongated spermatids	RACK1	2.24482	0.142	0.024	1.80873e-31	6.45591e-27
Elongated spermatids	MAPK8	2.24433	0.358	0.056	1.52465e-96	5.44193e-92
Elongated spermatids	YTHDC2	2.2422	0.161	0.025	2.72424e-38	9.72363e-34
Elongated spermatids	ATP5F1B	2.24118	0.101	0.018	6.33059e-21	2.25958e-16
Elongated spermatids	C18orf54	2.23552	0.117	0.016	5.55615e-29	1.98316e-24
Elongated spermatids	DYNLT1	2.23528	0.121	0.017	7.78193e-30	2.7776e-25
Elongated spermatids	IFT122	2.23526	0.253	0.04	5.50078e-63	1.96339e-58
Elongated spermatids	HNRNPD	2.23419	0.141	0.019	1.24646e-35	4.44898e-31
Elongated spermatids	IVNS1ABP	2.2299	0.132	0.019	2.87712e-31	1.02693e-26
Elongated spermatids	EIF5	2.22763	0.154	0.026	1.59478e-34	5.69223e-30
Elongated spermatids	RPS7	2.22259	0.275	0.036	2.0083e-77	7.16823e-73
Elongated spermatids	DNAJC10	2.22185	0.213	0.034	4.38743e-51	1.566e-46
Elongated spermatids	SYCP1	2.21438	0.358	0.066	3.92504e-87	1.40096e-82
Elongated spermatids	SOX9	2.21315	0.105	0.018	1.44293e-22	5.15025e-18
Elongated spermatids	ACRBP	2.21188	0.2	0.035	2.30016e-44	8.20996e-40
Elongated spermatids	STRBP	2.21187	0.36	0.058	3.86458e-95	1.37938e-90
Elongated spermatids	APH1B	2.20698	0.254	0.043	5.97702e-61	2.13338e-56
Elongated spermatids	NDUFA5	2.20584	0.128	0.017	1.0459e-32	3.73313e-28
Elongated spermatids	FAM241B	2.20431	0.119	0.018	1.53116e-28	5.46518e-24
Elongated spermatids	PPP1CB	2.20283	0.205	0.033	7.10333e-49	2.53539e-44
Elongated spermatids	SNX13	2.20056	0.496	0.098	3.55234e-129	1.26794e-124
Elongated spermatids	FAM242A	2.19867	0.101	0.017	3.11399e-22	1.11148e-17
Elongated spermatids	AC004936.1	2.19836	0.138	0.022	1.93005e-31	6.88893e-27
Elongated spermatids	ZNF571	2.19432	0.108	0.016	7.09428e-26	2.53216e-21
Elongated spermatids	MT-CO3	2.18592	0.997	0.402	0	0
Elongated spermatids	ARGLU1	2.18307	0.23	0.033	7.88375e-61	2.81395e-56
Elongated spermatids	LPGAT1	2.18075	0.348	0.052	1.98776e-96	7.0949e-92
Elongated spermatids	ARL6IP1	2.17898	0.17	0.032	1.44731e-35	5.16589e-31
Elongated spermatids	FUS	2.17855	0.205	0.033	2.91238e-49	1.03952e-44
Elongated spermatids	CMTM6	2.17557	0.125	0.02	2.37734e-28	8.48542e-24
Elongated spermatids	RPL23A	2.17099	0.185	0.034	2.39979e-39	8.56556e-35
Elongated spermatids	ATP5F1E	2.16922	0.307	0.046	7.81362e-83	2.78892e-78
Elongated spermatids	SYCE3	2.16493	0.151	0.02	3.05716e-37	1.09119e-32
Elongated spermatids	LAPTM4A	2.16279	0.32	0.047	5.62642e-89	2.00824e-84
Elongated spermatids	LINC00395	2.16245	0.111	0.017	5.64165e-27	2.01368e-22
Elongated spermatids	AC010907.1	2.16213	0.116	0.019	2.25189e-26	8.03766e-22
Elongated spermatids	AKAP11	2.16004	0.168	0.029	2.15605e-37	7.69558e-33
Elongated spermatids	PABPN1	2.16	0.163	0.029	2.82509e-35	1.00836e-30
Elongated spermatids	EEF1A1	2.15928	0.491	0.096	9.81461e-130	3.50313e-125
Elongated spermatids	CPNE8	2.15399	0.269	0.056	3.20575e-56	1.14423e-51
Elongated spermatids	RPS2	2.14731	0.218	0.034	1.73284e-52	6.18501e-48
Elongated spermatids	SHCBP1L	2.14722	0.387	0.074	9.47195e-95	3.38082e-90
Elongated spermatids	MT-ND3	2.14679	0.991	0.365	0	0
Elongated spermatids	EXOC5	2.14391	0.238	0.036	9.54998e-60	3.40868e-55
Elongated spermatids	PTPN20	2.1432	0.136	0.017	2.59651e-37	9.26773e-33
Elongated spermatids	ODF2L	2.14074	0.12	0.016	1.40796e-31	5.02545e-27
Elongated spermatids	RCN2	2.13645	0.227	0.037	2.61656e-54	9.3393e-50
Elongated spermatids	RPS8	2.13432	0.2	0.037	3.81503e-43	1.3617e-38
Elongated spermatids	MRPL51	2.12969	0.159	0.022	3.17054e-40	1.13166e-35
Elongated spermatids	VASH2	2.12216	0.128	0.018	5.10166e-34	1.82094e-29
Elongated spermatids	FER	2.11819	0.542	0.154	2.12097e-115	7.57036e-111
Elongated spermatids	TUG1	2.11514	0.158	0.03	3.59475e-33	1.28307e-28
Elongated spermatids	GSTCD	2.11477	0.321	0.061	2.04273e-74	7.29112e-70
Elongated spermatids	NOVA1	2.11177	0.268	0.045	2.74422e-65	9.79495e-61
Elongated spermatids	GMCL1	2.10659	0.237	0.036	6.86638e-61	2.45082e-56
Elongated spermatids	BMP2K	2.10569	0.3	0.052	1.09003e-72	3.89064e-68
Elongated spermatids	RNASEK	2.09922	0.102	0.016	8.12946e-24	2.90165e-19
Elongated spermatids	RPS4X	2.09699	0.109	0.014	5.98453e-29	2.13606e-24
Elongated spermatids	SNAPC3	2.096	0.154	0.025	1.57664e-36	5.6275e-32
Elongated spermatids	CCDC112	2.09416	0.151	0.026	4.35136e-34	1.55313e-29
Elongated spermatids	CCT7	2.09378	0.133	0.022	9.70056e-30	3.46242e-25
Elongated spermatids	RPS26	2.09249	0.102	0.014	3.23975e-26	1.15636e-21
Elongated spermatids	CHIC2	2.08991	0.185	0.032	1.82508e-41	6.51427e-37
Elongated spermatids	PDE3B	2.08909	0.298	0.052	1.70493e-73	6.08539e-69
Elongated spermatids	SRSF10	2.08657	0.164	0.029	2.67307e-36	9.541e-32
Elongated spermatids	TP53INP1	2.08651	0.143	0.026	8.51944e-31	3.04084e-26
Elongated spermatids	RFX3	2.08404	0.587	0.152	6.00189e-141	2.14225e-136
Elongated spermatids	MBD2	2.08167	0.105	0.018	3.62645e-23	1.29439e-18
Elongated spermatids	RPL5	2.08059	0.257	0.046	1.33404e-59	4.76159e-55
Elongated spermatids	PCMTD1	2.07874	0.169	0.025	2.21066e-43	7.89049e-39
Elongated spermatids	HORMAD1	2.07729	0.159	0.028	2.62067e-35	9.35395e-31
Elongated spermatids	SMARCAD1	2.07426	0.15	0.026	8.26576e-34	2.9503e-29
Elongated spermatids	ATF2	2.07181	0.216	0.038	1.9771e-49	7.05687e-45
Elongated spermatids	SYCP2	2.07132	0.25	0.052	3.08997e-51	1.1029e-46
Elongated spermatids	HMGN1	2.06906	0.216	0.036	7.55893e-51	2.69801e-46
Elongated spermatids	TOP2A	2.06902	0.229	0.042	1.30078e-51	4.64286e-47
Elongated spermatids	ZFAND6	2.06796	0.489	0.101	2.04492e-123	7.29894e-119
Elongated spermatids	C4orf48	2.06707	0.181	0.028	2.94513e-44	1.05121e-39
Elongated spermatids	CPEB2	2.06379	0.276	0.051	2.1592e-63	7.70684e-59
Elongated spermatids	ARMC10	2.06106	0.102	0.012	4.00559e-29	1.42971e-24
Elongated spermatids	AC016687.2	2.06067	0.221	0.049	1.10832e-42	3.95592e-38
Elongated spermatids	ATP5F1A	2.05997	0.131	0.025	3.65765e-27	1.30552e-22
Elongated spermatids	TUBA1B	2.05968	0.153	0.025	6.16563e-36	2.2007e-31
Elongated spermatids	CCNT2	2.05797	0.14	0.028	6.23399e-28	2.2251e-23
Elongated spermatids	VRK1	2.05729	0.187	0.035	1.47728e-40	5.27287e-36
Elongated spermatids	VAPA	2.056	0.17	0.026	6.36285e-42	2.27109e-37
Elongated spermatids	COPE	2.05525	0.15	0.026	3.27912e-34	1.17042e-29
Elongated spermatids	CASD1	2.05426	0.139	0.024	2.36007e-31	8.42378e-27
Elongated spermatids	SNAPC1	2.05331	0.135	0.026	4.31002e-28	1.53837e-23
Elongated spermatids	VPS13A	2.05302	0.518	0.12	9.52412e-125	3.39944e-120
Elongated spermatids	NFXL1	2.05092	0.122	0.02	3.13996e-27	1.12074e-22
Elongated spermatids	Z94721.1	2.05084	0.178	0.03	1.51133e-41	5.39438e-37
Elongated spermatids	ADSS	2.05057	0.183	0.031	8.65899e-43	3.09065e-38
Elongated spermatids	NDUFC2	2.04962	0.123	0.025	3.09519e-24	1.10477e-19
Elongated spermatids	PEX5	2.04957	0.18	0.03	8.65349e-42	3.08869e-37
Elongated spermatids	NDUFA2	2.04899	0.107	0.02	3.00414e-22	1.07227e-17
Elongated spermatids	CKS2	2.04581	0.129	0.024	3.18429e-28	1.13657e-23
Elongated spermatids	SERPINF1	2.04507	0.135	0.022	4.51398e-31	1.61117e-26
Elongated spermatids	PHIP	2.04456	0.278	0.051	4.9522e-65	1.76759e-60
Elongated spermatids	PRKAR2A-AS1	2.04077	0.114	0.019	7.84309e-25	2.79943e-20
Elongated spermatids	MT-ND1	2.0406	0.918	0.303	0	0
Elongated spermatids	TEX30	2.03943	0.156	0.032	9.47473e-31	3.38181e-26
Elongated spermatids	MYO19	2.0387	0.368	0.083	1.17803e-78	4.20473e-74
Elongated spermatids	IGSF11	2.03761	0.357	0.074	1.13089e-80	4.03649e-76
Elongated spermatids	FBXO33	2.03754	0.206	0.036	1.16356e-47	4.1531e-43
Elongated spermatids	PAXBP1	2.03606	0.292	0.054	1.63557e-67	5.83784e-63
Elongated spermatids	TMBIM4	2.03574	0.185	0.031	1.73136e-43	6.17975e-39
Elongated spermatids	SPATA22	2.0289	0.284	0.051	2.2725e-67	8.11124e-63
Elongated spermatids	FAR1	2.0259	0.301	0.057	9.23706e-71	3.29698e-66
Elongated spermatids	ATP6V1G1	2.02579	0.116	0.022	1.99529e-23	7.12178e-19
Elongated spermatids	RPS19	2.02513	0.322	0.063	1.45928e-73	5.2086e-69
Elongated spermatids	AC087071.2	2.02399	0.138	0.024	5.96566e-32	2.12932e-27
Elongated spermatids	MICU3	2.02358	0.159	0.022	4.41472e-42	1.57575e-37
Elongated spermatids	SRSF1	2.01844	0.145	0.028	8.03808e-30	2.86903e-25
Elongated spermatids	REPS1	2.01696	0.16	0.026	1.87364e-38	6.68757e-34
Elongated spermatids	CD46	2.01641	0.313	0.062	5.75476e-71	2.05404e-66
Elongated spermatids	RPS11	2.01556	0.256	0.048	9.25021e-58	3.30168e-53
Elongated spermatids	SAP18	2.01462	0.152	0.03	1.63207e-30	5.82535e-26
Elongated spermatids	PEBP1	2.0131	0.143	0.026	2.59636e-31	9.26718e-27
Elongated spermatids	UFL1	2.01085	0.167	0.026	7.37196e-41	2.63127e-36
Elongated spermatids	RPLP0	2.00931	0.188	0.035	2.63658e-40	9.41073e-36
Elongated spermatids	KRIT1	2.00922	0.147	0.027	6.51367e-32	2.32492e-27
Elongated spermatids	TMEM259	2.0081	0.158	0.026	2.24758e-37	8.02229e-33
Elongated spermatids	ATP5PB	2.00806	0.114	0.021	1.14271e-23	4.07869e-19
Elongated spermatids	LPXN	2.00595	0.177	0.03	4.43613e-41	1.58339e-36
Elongated spermatids	CLGN	2.00335	0.195	0.032	5.91244e-47	2.11033e-42
Elongated spermatids	COMMD3	2.00152	0.134	0.024	6.20251e-30	2.21386e-25
Elongated spermatids	LEMD3	2.0014	0.142	0.021	3.59412e-35	1.28285e-30
Elongated spermatids	DHRSX	-2.00833	0.08	0.132	1.01695e-41	3.62979e-37
Elongated spermatids	CDH13	-2.01257	0.136	0.277	4.40773e-71	1.57325e-66
Elongated spermatids	EYA2	-2.01365	0.057	0.112	8.83302e-28	3.15277e-23
Elongated spermatids	BPIFA3	-2.02294	0.041	0.101	2.55542e-20	9.12105e-16
Elongated spermatids	BICD1	-2.03605	0.073	0.145	2.16892e-41	7.74152e-37
Elongated spermatids	EIF2B3	-2.04496	0.062	0.108	2.3906e-27	8.53275e-23
Elongated spermatids	DSCAM	-2.05428	0.102	0.224	3.81474e-56	1.36159e-51
Elongated spermatids	SEMA3A	-2.05433	0.067	0.12	1.5671e-34	5.59346e-30
Elongated spermatids	AC093865.1	-2.05962	0.055	0.108	2.43569e-27	8.69372e-23
Elongated spermatids	AC068631.1	-2.06076	0.05	0.107	3.23393e-25	1.15429e-20
Elongated spermatids	C10orf62	-2.06336	0.141	0.259	1.72441e-70	6.15492e-66
Elongated spermatids	LUZP2	-2.06877	0.064	0.137	4.42822e-31	1.58056e-26
Elongated spermatids	ADAM12	-2.0721	0.052	0.109	2.17747e-30	7.77206e-26
Elongated spermatids	KIAA1671	-2.07942	0.071	0.118	4.72497e-36	1.68648e-31
Elongated spermatids	AC002460.2	-2.08497	0.056	0.118	7.35271e-31	2.6244e-26
Elongated spermatids	AC008415.1	-2.0935	0.045	0.113	2.30276e-25	8.21923e-21
Elongated spermatids	MYO3B	-2.1009	0.082	0.163	4.6106e-44	1.64566e-39
Elongated spermatids	PCDH15	-2.10511	0.114	0.248	7.20234e-64	2.57073e-59
Elongated spermatids	PTPRD	-2.10602	0.181	0.347	9.59861e-102	3.42603e-97
Elongated spermatids	MTRNR2L12	-2.10615	0.149	0.27	1.57343e-78	5.61604e-74
Elongated spermatids	DGLUCY	-2.11679	0.078	0.138	2.29486e-41	8.19104e-37
Elongated spermatids	ADAMTSL1	-2.11823	0.095	0.199	4.00899e-52	1.43093e-47
Elongated spermatids	DMD	-2.12265	0.12	0.231	7.04453e-63	2.51441e-58
Elongated spermatids	FRMD4B	-2.12886	0.074	0.144	1.03827e-39	3.70588e-35
Elongated spermatids	AC004917.1	-2.12908	0.051	0.11	3.51026e-27	1.25292e-22
Elongated spermatids	IQCJ-SCHIP1	-2.12981	0.054	0.113	5.48996e-27	1.95953e-22
Elongated spermatids	LINC01090	-2.14172	0.06	0.136	2.7306e-34	9.74633e-30
Elongated spermatids	CUX1	-2.14766	0.133	0.294	8.23357e-82	2.93881e-77
Elongated spermatids	KSR2	-2.14998	0.081	0.167	4.32674e-49	1.54434e-44
Elongated spermatids	AC096570.1	-2.16145	0.06	0.142	9.49121e-38	3.3877e-33
Elongated spermatids	DOK6	-2.16323	0.05	0.11	2.54661e-30	9.0896e-26
Elongated spermatids	PPP2R2C	-2.1633	0.066	0.127	5.31703e-35	1.89781e-30
Elongated spermatids	XYLT1	-2.16906	0.059	0.134	8.88743e-34	3.17219e-29
Elongated spermatids	BASP1	-2.17062	0.052	0.127	2.32606e-29	8.30241e-25
Elongated spermatids	MARK2	-2.17848	0.166	0.269	1.2088e-90	4.31456e-86
Elongated spermatids	AC092819.2	-2.18269	0.047	0.103	2.54234e-28	9.07436e-24
Elongated spermatids	SORBS2	-2.18795	0.061	0.126	3.51827e-35	1.25577e-30
Elongated spermatids	NHSL1	-2.19993	0.053	0.109	6.075e-27	2.16835e-22
Elongated spermatids	LHFPL3	-2.20138	0.058	0.137	5.12371e-36	1.82881e-31
Elongated spermatids	LINC01082	-2.23416	0.049	0.104	1.5882e-34	5.66875e-30
Elongated spermatids	TMEM31	-2.2354	0.057	0.125	2.70727e-35	9.66307e-31
Elongated spermatids	DGKI	-2.2518	0.049	0.116	1.17221e-32	4.18398e-28
Elongated spermatids	PXDNL	-2.2561	0.046	0.105	3.36999e-29	1.20285e-24
Elongated spermatids	THSD7B	-2.27218	0.069	0.168	6.7394e-47	2.40549e-42
Elongated spermatids	LINC01322	-2.27568	0.066	0.153	1.92311e-40	6.86415e-36
Elongated spermatids	LINC01414	-2.27645	0.048	0.118	7.33771e-33	2.61905e-28
Elongated spermatids	GTF2IRD1	-2.2871	0.066	0.129	7.10204e-41	2.53493e-36
Elongated spermatids	PRM2	-2.2953	0.951	0.946	2.85518e-255	1.0191e-250
Elongated spermatids	AL157944.1	-2.30045	0.045	0.127	1.02137e-31	3.64558e-27
Elongated spermatids	DGCR6L	-2.31341	0.05	0.131	6.27654e-35	2.24029e-30
Elongated spermatids	ESRRG	-2.3227	0.055	0.132	1.20362e-34	4.29607e-30
Elongated spermatids	PTPRS	-2.32631	0.065	0.134	3.14589e-40	1.12286e-35
Elongated spermatids	SGCZ	-2.32962	0.083	0.223	1.2572e-57	4.48734e-53
Elongated spermatids	RALYL	-2.33323	0.043	0.112	1.52498e-29	5.44312e-25
Elongated spermatids	LINC02755	-2.33882	0.083	0.206	8.88572e-60	3.17158e-55
Elongated spermatids	NTN1	-2.34913	0.058	0.128	1.3516e-41	4.82426e-37
Elongated spermatids	ERVMER61-1	-2.35243	0.049	0.12	2.9442e-35	1.05087e-30
Elongated spermatids	CACNA1A	-2.35331	0.112	0.275	6.63688e-85	2.3689e-80
Elongated spermatids	RYR1	-2.36185	0.056	0.13	4.34574e-36	1.55113e-31
Elongated spermatids	CCDC26	-2.37077	0.076	0.198	2.31226e-55	8.25313e-51
Elongated spermatids	SASH1	-2.37274	0.062	0.142	1.76677e-41	6.30613e-37
Elongated spermatids	TMEM239	-2.3739	0.096	0.182	1.45694e-67	5.20027e-63
Elongated spermatids	ZFPM2-AS1	-2.381	0.04	0.111	1.19014e-30	4.24798e-26
Elongated spermatids	GRIK1	-2.38523	0.035	0.106	4.16828e-28	1.48778e-23
Elongated spermatids	SORCS2	-2.38529	0.045	0.104	1.97306e-29	7.04243e-25
Elongated spermatids	AC097518.2	-2.38582	0.042	0.109	3.23079e-31	1.15316e-26
Elongated spermatids	MYH14	-2.39539	0.043	0.103	1.90395e-30	6.79577e-26
Elongated spermatids	AP002989.1	-2.39719	0.055	0.136	7.2695e-40	2.5947e-35
Elongated spermatids	NTM	-2.39962	0.073	0.181	8.04018e-53	2.86978e-48
Elongated spermatids	CDH12	-2.42369	0.076	0.202	3.18689e-61	1.1375e-56
Elongated spermatids	AC009975.1	-2.42524	0.036	0.116	9.22636e-30	3.29316e-25
Elongated spermatids	DENND2A	-2.42628	0.059	0.135	4.12175e-46	1.47118e-41
Elongated spermatids	RASGEF1B	-2.43205	0.057	0.127	3.22331e-43	1.1505e-38
Elongated spermatids	LRRTM4	-2.43777	0.045	0.137	2.77011e-36	9.88734e-32
Elongated spermatids	MIR3681HG	-2.44456	0.08	0.208	4.41463e-65	1.57571e-60
Elongated spermatids	ITGA9	-2.45157	0.057	0.144	6.9634e-34	2.48545e-29
Elongated spermatids	SLC4A4	-2.45617	0.04	0.121	1.91798e-30	6.84585e-26
Elongated spermatids	CDH4	-2.45941	0.056	0.146	6.83422e-43	2.43934e-38
Elongated spermatids	SPANXB1	-2.46248	0.063	0.172	6.05932e-46	2.16275e-41
Elongated spermatids	TMEM192	-2.46286	0.049	0.11	3.42996e-35	1.22426e-30
Elongated spermatids	PITPNC1	-2.4725	0.073	0.177	7.19137e-57	2.56681e-52
Elongated spermatids	AC010325.1	-2.47369	0.134	0.254	7.68317e-95	2.74235e-90
Elongated spermatids	OPCML	-2.47386	0.082	0.219	3.38033e-70	1.20654e-65
Elongated spermatids	HIP1	-2.47784	0.098	0.232	2.19917e-79	7.84948e-75
Elongated spermatids	BANK1	-2.47836	0.061	0.151	3.83775e-48	1.36981e-43
Elongated spermatids	SYT1	-2.49036	0.043	0.12	2.45341e-37	8.75696e-33
Elongated spermatids	INSR	-2.49657	0.067	0.176	1.13315e-52	4.04454e-48
Elongated spermatids	AC098588.3	-2.51053	0.053	0.136	2.07547e-42	7.40797e-38
Elongated spermatids	MECOM	-2.52367	0.035	0.11	1.47163e-31	5.25271e-27
Elongated spermatids	PIEZO2	-2.52642	0.052	0.143	8.0939e-45	2.88896e-40
Elongated spermatids	DOP1B	-2.54155	0.05	0.13	1.05725e-39	3.77364e-35
Elongated spermatids	TMEM132D	-2.54281	0.075	0.216	6.74099e-68	2.40606e-63
Elongated spermatids	SLC9A9	-2.54835	0.048	0.116	7.24349e-38	2.58542e-33
Elongated spermatids	GSG1L	-2.55518	0.057	0.138	1.52662e-45	5.44896e-41
Elongated spermatids	SPANXN5	-2.56248	0.058	0.169	8.32096e-44	2.97e-39
Elongated spermatids	LELP1	-2.56423	0.382	0.571	5.59636e-240	1.99751e-235
Elongated spermatids	SDK2	-2.57241	0.064	0.142	1.24542e-44	4.44526e-40
Elongated spermatids	ABR	-2.57666	0.061	0.155	6.28021e-48	2.2416e-43
Elongated spermatids	LINC00486	-2.59881	0.231	0.535	5.09956e-217	1.82018e-212
Elongated spermatids	DAG1	-2.60273	0.155	0.307	6.22149e-118	2.22064e-113
Elongated spermatids	SHISA9	-2.60442	0.045	0.131	1.10532e-38	3.94521e-34
Elongated spermatids	DGKB	-2.60461	0.044	0.137	1.00074e-40	3.57195e-36
Elongated spermatids	RBFOX3	-2.63392	0.047	0.124	8.31241e-40	2.96695e-35
Elongated spermatids	NXN	-2.6688	0.048	0.129	5.7446e-42	2.05042e-37
Elongated spermatids	FRMD4A	-2.69812	0.092	0.271	9.92976e-90	3.54423e-85
Elongated spermatids	SPEM2	-2.75229	0.079	0.234	1.28386e-78	4.58249e-74
Elongated spermatids	ERC2	-2.7559	0.074	0.2	1.39905e-72	4.99364e-68
Elongated spermatids	GRIN2B	-2.77747	0.029	0.103	4.39957e-31	1.57034e-26
Elongated spermatids	AGBL1	-2.80021	0.068	0.221	4.93347e-78	1.7609e-73
Elongated spermatids	NOS1	-2.81358	0.036	0.118	2.34154e-39	8.35765e-35
Elongated spermatids	SNTB1	-2.82849	0.037	0.126	1.94066e-40	6.9268e-36
Elongated spermatids	CELSR1	-2.83433	0.034	0.104	2.80442e-36	1.00098e-31
Elongated spermatids	RBFOX1	-2.83617	0.201	0.553	6.39147e-239	2.28131e-234
Elongated spermatids	SLC8A1	-2.85622	0.033	0.122	2.12753e-41	7.59378e-37
Elongated spermatids	AC099489.1	-2.86949	0.03	0.104	6.24694e-36	2.22972e-31
Elongated spermatids	PALM2-AKAP2	-2.87012	0.045	0.142	5.52929e-47	1.97357e-42
Elongated spermatids	LINC01505	-2.89133	0.054	0.168	5.35853e-59	1.91262e-54
Elongated spermatids	AL138720.1	-2.89133	0.05	0.171	1.25569e-57	4.48195e-53
Elongated spermatids	SGCD	-2.91521	0.046	0.165	2.37814e-57	8.48828e-53
Elongated spermatids	CNTNAP2	-2.91695	0.132	0.405	5.10205e-162	1.82107e-157
Elongated spermatids	CUX2	-2.93713	0.045	0.154	1.12416e-55	4.01245e-51
Elongated spermatids	SHANK2	-2.94191	0.051	0.162	2.83495e-60	1.01188e-55
Elongated spermatids	GPM6A	-2.95947	0.031	0.124	1.55748e-42	5.55911e-38
Elongated spermatids	RPH3A	-2.98226	0.031	0.125	9.96429e-43	3.55655e-38
Elongated spermatids	ZNF423	-2.98745	0.028	0.106	5.4998e-37	1.96304e-32
Elongated spermatids	COL26A1	-3.00749	0.031	0.112	1.92026e-40	6.85399e-36
Elongated spermatids	AL136456.1	-3.01754	0.037	0.124	1.92436e-46	6.86861e-42
Elongated spermatids	LRP1B	-3.03185	0.093	0.337	8.14215e-129	2.90618e-124
Elongated spermatids	LINC01411	-3.03317	0.037	0.134	1.37337e-50	4.90196e-46
Elongated spermatids	CNTN5	-3.05293	0.059	0.228	8.86717e-85	3.16496e-80
Elongated spermatids	LINC02006	-3.06816	0.032	0.126	9.72694e-47	3.47184e-42
Elongated spermatids	OBI1-AS1	-3.11221	0.023	0.109	4.87398e-37	1.73967e-32
Elongated spermatids	NWD1	-3.11483	0.027	0.11	1.15829e-39	4.13429e-35
Elongated spermatids	KCNB1	-3.14459	0.04	0.158	1.06517e-60	3.80189e-56
Elongated spermatids	C8orf34	-3.15083	0.025	0.106	3.5137e-38	1.25414e-33
Elongated spermatids	AC068587.4	-3.17014	0.035	0.113	2.84224e-45	1.01448e-40
Elongated spermatids	AC016766.1	-3.20449	0.024	0.118	7.99461e-41	2.85352e-36
Elongated spermatids	CPA6	-3.20695	0.037	0.156	5.77633e-61	2.06175e-56
Elongated spermatids	PAK5	-3.2794	0.027	0.109	1.40803e-41	5.02566e-37
Elongated spermatids	EGLN3	-3.29742	0.035	0.145	4.97383e-59	1.77531e-54
Elongated spermatids	DEPTOR	-3.30374	0.035	0.112	1.05756e-49	3.77475e-45
Elongated spermatids	CLMP	-3.3399	0.024	0.109	3.72889e-43	1.33095e-38
Elongated spermatids	PLCG2	-3.38792	0.181	0.459	2.32227e-180	8.28888e-176
Elongated spermatids	CLIP2	-3.44956	0.028	0.126	6.67306e-53	2.38181e-48
Elongated spermatids	AC092100.1	-3.45054	0.032	0.165	1.17594e-65	4.1973e-61
Elongated spermatids	AL592429.2	-3.47479	0.031	0.143	1.08408e-59	3.86941e-55
Elongated spermatids	U91319.1	-3.47486	0.027	0.138	1.37138e-54	4.89485e-50
Elongated spermatids	SPRY4-AS1	-3.50562	0.032	0.158	1.74301e-65	6.22134e-61
Elongated spermatids	LRRC4C	-3.55905	0.053	0.266	3.64307e-115	1.30032e-110
Elongated spermatids	SORCS3-AS1	-3.56184	0.125	0.481	7.57348e-174	2.7032e-169
Elongated spermatids	RAP1GAP2	-3.58055	0.042	0.181	1.10998e-80	3.96185e-76
Elongated spermatids	BTBD11	-3.77447	0.019	0.119	6.21029e-53	2.21664e-48
Elongated spermatids	LINC00276	-3.84859	0.022	0.138	4.25475e-62	1.51865e-57
Elongated spermatids	CNTNAP5	-3.88881	0.029	0.188	5.38298e-87	1.92135e-82
Elongated spermatids	SCARA5	-3.91308	0.017	0.101	1.90401e-46	6.79599e-42
Elongated spermatids	AL627171.2	-4.0373	0.038	0.196	2.12605e-96	7.58852e-92
Elongated spermatids	TENM3-AS1	-4.30477	0.011	0.106	5.53566e-53	1.97584e-48
Elongated spermatids	AL591506.1	-4.51297	0.015	0.146	2.38006e-75	8.49515e-71
Sertoli cells	AL354733.3	4.55361	0.114	0.004	5.91513e-258	2.11129e-253
Sertoli cells	AL589669.1	4.43478	0.452	0.027	0	0
Sertoli cells	RBAKDN	3.8615	0.113	0.006	4.64527e-229	1.65803e-224
Sertoli cells	AP000462.1	3.71106	0.144	0.008	7.13585e-302	2.547e-297
Sertoli cells	AC105402.3	3.67394	0.559	0.049	0	0
Sertoli cells	AC009971.1	3.45946	0.221	0.008	0	0
Sertoli cells	HIST1H2AA	3.42388	0.123	0.005	1.61325e-271	5.75816e-267
Sertoli cells	JRKL-AS1	3.28229	0.636	0.066	0	0
Sertoli cells	AC068205.1	3.16644	0.16	0.012	0	2.94631e-306
Sertoli cells	AL359851.1	2.99718	0.183	0.023	1.36283e-304	4.86437e-300
Sertoli cells	C5orf30	2.94402	0.11	0.013	1.25579e-179	4.48228e-175
Sertoli cells	MIR202HG	2.89984	0.902	0.218	0	0
Sertoli cells	ST6GAL2	2.89253	0.432	0.043	0	0
Sertoli cells	RPS23	2.87725	0.148	0.014	9.09295e-264	3.24555e-259
Sertoli cells	AC021231.1	2.8489	0.343	0.029	0	0
Sertoli cells	HMGB4	2.84878	0.146	0.019	7.73449e-231	2.76067e-226
Sertoli cells	AC024084.1	2.75039	0.428	0.075	0	0
Sertoli cells	RPLP1	2.72596	0.323	0.036	0	0
Sertoli cells	LINC01340	2.67401	0.735	0.121	0	0
Sertoli cells	TRHDE-AS1	2.65272	0.187	0.016	0	0
Sertoli cells	KITLG	2.64111	0.491	0.072	0	0
Sertoli cells	HMGCS2	2.63504	0.138	0.006	0	0
Sertoli cells	SNHG8	2.61846	0.16	0.021	1.81265e-254	6.4699e-250
Sertoli cells	LINC01297	2.5648	0.437	0.063	0	0
Sertoli cells	TSPAN6	2.53648	0.164	0.012	0	0
Sertoli cells	MED31	2.51793	0.106	0.016	1.10155e-150	3.93175e-146
Sertoli cells	AC015871.7	2.51238	0.104	0.014	8.19391e-161	2.92465e-156
Sertoli cells	PNMA3	2.46972	0.281	0.029	0	0
Sertoli cells	AL590705.1	2.45643	0.408	0.046	0	0
Sertoli cells	AC104664.1	2.45182	0.64	0.13	0	0
Sertoli cells	AF279873.3	2.44116	0.627	0.117	0	0
Sertoli cells	TSACC	2.43546	0.113	0.015	4.65747e-174	1.66239e-169
Sertoli cells	AC006144.2	2.43325	0.109	0.021	5.06182e-135	1.80672e-130
Sertoli cells	SCML1	2.42964	0.775	0.167	0	0
Sertoli cells	AL355488.1	2.42204	0.116	0.023	6.9077e-143	2.46557e-138
Sertoli cells	RPL29	2.41839	0.155	0.022	2.62956e-238	9.38568e-234
Sertoli cells	FAU	2.40258	0.113	0.013	1.98581e-189	7.08795e-185
Sertoli cells	RPS18	2.38032	0.201	0.028	0	0
Sertoli cells	SNHG19	2.37627	0.183	0.032	4.90754e-255	1.75165e-250
Sertoli cells	RPS21	2.37112	0.188	0.026	1.09305e-297	3.90142e-293
Sertoli cells	AL355612.1	2.34261	0.871	0.242	0	0
Sertoli cells	UNC5C	2.33809	0.83	0.211	0	0
Sertoli cells	FAM221A	2.32907	0.43	0.075	0	0
Sertoli cells	RPL15	2.31348	0.234	0.034	0	0
Sertoli cells	DPY19L1	2.30597	0.631	0.136	0	0
Sertoli cells	VSIG1	2.29895	0.375	0.049	0	0
Sertoli cells	C5orf47	2.29699	0.107	0.009	3.14593e-214	1.12288e-209
Sertoli cells	SEMA3C	2.28727	0.717	0.163	0	0
Sertoli cells	INTS6L	2.2789	0.661	0.118	0	0
Sertoli cells	MIR924HG	2.26998	0.964	0.399	0	0
Sertoli cells	EMB	2.26702	0.537	0.098	0	0
Sertoli cells	OOSP2	2.25489	0.122	0.023	5.2207e-157	1.86342e-152
Sertoli cells	ZBTB20-AS5	2.25285	0.131	0.017	7.03528e-210	2.5111e-205
Sertoli cells	AC114956.3	2.25127	0.255	0.051	0	0
Sertoli cells	CTSV	2.2494	0.235	0.02	0	0
Sertoli cells	LINC00498	2.2474	0.108	0.015	7.05605e-163	2.51852e-158
Sertoli cells	AMMECR1	2.23964	0.26	0.034	0	0
Sertoli cells	TNP1	2.23099	0.202	0.075	1.07772e-182	3.84671e-178
Sertoli cells	RPLP0	2.2285	0.148	0.021	5.96087e-230	2.12761e-225
Sertoli cells	ARL6IP6	2.22742	0.352	0.067	0	0
Sertoli cells	GYG1	2.22627	0.351	0.051	0	0
Sertoli cells	SAMD12-AS1	2.2186	0.537	0.063	0	0
Sertoli cells	AC009879.4	2.21434	0.326	0.046	0	0
Sertoli cells	GULP1	2.2087	0.709	0.156	0	0
Sertoli cells	NABP1	2.2024	0.382	0.051	0	0
Sertoli cells	SS18	2.19622	0.825	0.223	0	0
Sertoli cells	IZUMO4	2.19129	0.105	0.013	1.0431e-171	3.72314e-167
Sertoli cells	SRSF7	2.18843	0.238	0.034	0	0
Sertoli cells	CITED1	2.1884	0.211	0.034	0	9.79662e-308
Sertoli cells	SRPX2	2.18745	0.11	0.017	9.74057e-155	3.4767e-150
Sertoli cells	PLP1	2.18168	0.207	0.029	0	0
Sertoli cells	SPINK2	2.17729	0.108	0.012	3.01382e-184	1.07572e-179
Sertoli cells	RPS28	2.16506	0.178	0.029	9.78846e-258	3.49379e-253
Sertoli cells	LINGO2	2.16196	0.467	0.056	0	0
Sertoli cells	LINC02388	2.15784	0.282	0.03	0	0
Sertoli cells	DIAPH2-AS1	2.15501	0.192	0.021	0	0
Sertoli cells	ERBB4	2.15037	0.993	0.603	0	0
Sertoli cells	AC093838.1	2.14889	0.248	0.058	2.25694e-294	8.05569e-290
Sertoli cells	MIR181A2HG	2.14641	0.149	0.017	2.23746e-257	7.98616e-253
Sertoli cells	H2AFJ	2.13662	0.187	0.038	1.78975e-233	6.38814e-229
Sertoli cells	ZDHHC2	2.13639	0.38	0.059	0	0
Sertoli cells	AL133320.2	2.12947	0.148	0.024	4.00041e-210	1.42787e-205
Sertoli cells	AC015813.1	2.12485	0.12	0.018	1.37192e-177	4.8968e-173
Sertoli cells	AC025171.1	2.10797	0.315	0.044	0	0
Sertoli cells	COX6C	2.10405	0.207	0.039	1.92473e-279	6.86996e-275
Sertoli cells	TUBB4B	2.09931	0.19	0.032	2.5999e-270	9.27982e-266
Sertoli cells	AC113370.1	2.09548	0.517	0.125	0	0
Sertoli cells	CXXC4	2.09408	0.186	0.023	0	0
Sertoli cells	RYBP	2.09401	0.632	0.149	0	0
Sertoli cells	DMRT1	2.09333	0.564	0.105	0	0
Sertoli cells	ABHD17B	2.09296	0.416	0.085	0	0
Sertoli cells	SF3B4	2.08701	0.115	0.024	2.08846e-134	7.45434e-130
Sertoli cells	ACVR2A	2.08554	0.453	0.086	0	0
Sertoli cells	LYPD6B	2.07923	0.388	0.064	0	0
Sertoli cells	AP001021.3	2.07795	0.186	0.018	0	0
Sertoli cells	MMADHC	2.07146	0.157	0.027	3.49593e-215	1.2478e-210
Sertoli cells	ANKRD45	2.06512	0.236	0.051	2.56272e-296	9.14711e-292
Sertoli cells	AP1S2	2.06012	0.602	0.136	0	0
Sertoli cells	ENC1	2.05532	0.215	0.03	0	0
Sertoli cells	SOX9	2.053	0.339	0.055	0	0
Sertoli cells	ZCCHC17	2.02664	0.605	0.132	0	0
Sertoli cells	MIR22HG	2.01786	0.101	0.016	6.68215e-143	2.38506e-138
Sertoli cells	NUTM2A-AS1	2.00451	0.572	0.108	0	0
Sertoli cells	MPPED2	2.00352	0.345	0.057	0	0
Sertoli cells	RPS14	2.00139	0.18	0.033	5.23108e-243	1.86713e-238
Sertoli cells	LINC00893	-2.01054	0.118	0.1	1.24681e-270	4.45025e-266
Sertoli cells	PRRC2C	-2.01063	0.802	0.817	0	0
Sertoli cells	HIP1	-2.01652	0.19	0.248	0	0
Sertoli cells	SGK2	-2.02571	0.053	0.101	3.82293e-74	1.36452e-69
Sertoli cells	MYO16	-2.0263	0.083	0.123	8.60609e-109	3.07177e-104
Sertoli cells	LINC01411	-2.03657	0.069	0.108	5.2299e-89	1.86671e-84
Sertoli cells	RNF213	-2.04403	0.228	0.346	0	0
Sertoli cells	NRXN3	-2.04598	0.14	0.157	0	0
Sertoli cells	ARHGAP22	-2.04889	0.081	0.127	1.28279e-117	4.57868e-113
Sertoli cells	DRAM1	-2.05351	0.069	0.101	6.12504e-80	2.18621e-75
Sertoli cells	AC007389.1	-2.05792	0.111	0.134	1.59395e-194	5.68929e-190
Sertoli cells	KIF26B	-2.08364	0.088	0.104	3.90806e-170	1.39491e-165
Sertoli cells	TCEAL4	-2.08729	0.253	0.288	0	0
Sertoli cells	LINC01320	-2.09009	0.129	0.15	4.99285e-248	1.7821e-243
Sertoli cells	FAM66D	-2.09053	0.056	0.111	3.70172e-82	1.32125e-77
Sertoli cells	TENM2	-2.10542	0.098	0.111	4.27394e-228	1.5255e-223
Sertoli cells	LINC01137	-2.11145	0.058	0.108	1.32666e-86	4.73523e-82
Sertoli cells	HSPA1B	-2.11527	0.058	0.131	2.60324e-103	9.29176e-99
Sertoli cells	GCNA	-2.1162	0.163	0.212	1.5575e-280	5.55917e-276
Sertoli cells	TTN	-2.12242	0.571	0.57	0	0
Sertoli cells	MDM2	-2.12429	0.217	0.302	0	0
Sertoli cells	INSR	-2.13184	0.422	0.594	0	0
Sertoli cells	KRTAP5-AS1	-2.13245	0.049	0.106	5.16708e-82	1.84429e-77
Sertoli cells	NRG1	-2.14194	0.112	0.127	2.2194e-245	7.9217e-241
Sertoli cells	DAPK3	-2.14602	0.093	0.159	9.00557e-145	3.21436e-140
Sertoli cells	NOTCH2NLA	-2.15832	0.08	0.128	1.64918e-141	5.88642e-137
Sertoli cells	AC100793.2	-2.15847	0.064	0.129	2.23698e-102	7.98444e-98
Sertoli cells	ZNF117	-2.17577	0.655	0.704	0	0
Sertoli cells	RNMT	-2.18827	0.451	0.529	0	0
Sertoli cells	RIN2	-2.19766	0.074	0.127	1.28123e-117	4.57311e-113
Sertoli cells	MYOM1	-2.21935	0.109	0.163	4.19267e-198	1.49649e-193
Sertoli cells	GSDMB	-2.22009	0.064	0.151	5.20051e-143	1.85622e-138
Sertoli cells	PPP2R5B	-2.23198	0.053	0.116	1.82932e-99	6.5294e-95
Sertoli cells	NLGN4Y	-2.23219	0.053	0.103	1.49826e-95	5.34773e-91
Sertoli cells	AGBL1	-2.2332	0.085	0.105	7.27119e-214	2.5953e-209
Sertoli cells	HSPA5	-2.24026	0.178	0.179	0	0
Sertoli cells	NBPF10	-2.24813	0.111	0.155	1.86788e-250	6.66703e-246
Sertoli cells	GAS8	-2.25719	0.064	0.111	1.55098e-105	5.53592e-101
Sertoli cells	H1F0	-2.25953	0.072	0.111	1.59492e-139	5.69275e-135
Sertoli cells	KNOP1	-2.26366	0.125	0.189	7.11174e-243	2.53839e-238
Sertoli cells	NXN	-2.26565	0.078	0.149	2.44997e-137	8.7447e-133
Sertoli cells	LRSAM1	-2.27288	0.084	0.149	2.81017e-150	1.00303e-145
Sertoli cells	P2RX7	-2.27419	0.098	0.16	1.3447e-183	4.79963e-179
Sertoli cells	DCC	-2.27537	0.074	0.106	1.86462e-168	6.6554e-164
Sertoli cells	STXBP1	-2.27657	0.064	0.125	1.68594e-103	6.01762e-99
Sertoli cells	CYFIP2	-2.28411	0.041	0.122	1.70037e-112	6.06911e-108
Sertoli cells	NECTIN3-AS1	-2.28665	0.269	0.378	0	0
Sertoli cells	CCND3	-2.28731	0.063	0.136	3.71056e-119	1.32441e-114
Sertoli cells	DNAH9	-2.29895	0.08	0.12	1.90497e-139	6.79942e-135
Sertoli cells	DNAJB1	-2.3245	0.09	0.158	4.1923e-166	1.49636e-161
Sertoli cells	GLUD2	-2.35152	0.121	0.199	1.42416e-261	5.08324e-257
Sertoli cells	AC007402.1	-2.3799	0.091	0.123	2.04863e-248	7.31219e-244
Sertoli cells	VEPH1	-2.40197	0.048	0.106	2.98456e-104	1.06528e-99
Sertoli cells	GOLGA6L4	-2.41836	0.1	0.163	8.17284e-205	2.91713e-200
Sertoli cells	TNIP1	-2.43928	0.086	0.171	3.28671e-192	1.17312e-187
Sertoli cells	DIXDC1	-2.4696	0.11	0.217	1.06439e-265	3.79912e-261
Sertoli cells	SORCS2	-2.49411	0.072	0.109	1.62085e-179	5.78529e-175
Sertoli cells	LMOD1	-2.50453	0.062	0.119	9.77905e-139	3.49044e-134
Sertoli cells	DOCK6	-2.53195	0.062	0.109	5.80937e-127	2.07354e-122
Sertoli cells	MTRNR2L12	-2.53553	0.556	0.685	0	0
Sertoli cells	CMYA5	-2.54045	0.449	0.708	0	0
Sertoli cells	TRANK1	-2.54929	0.075	0.2	2.60528e-238	9.29902e-234
Sertoli cells	PLA2G4C	-2.5757	0.17	0.333	0	0
Sertoli cells	PCDH15	-2.60124	0.082	0.131	5.35846e-244	1.9126e-239
Sertoli cells	HIST1H2BG	-2.60428	0.046	0.104	6.38583e-128	2.2793e-123
Sertoli cells	FRMD4A	-2.61284	0.122	0.206	1.03463e-275	3.6929e-271
Sertoli cells	SNED1	-2.65621	0.185	0.358	0	0
Sertoli cells	CNTNAP2	-2.68112	0.172	0.254	0	0
Sertoli cells	TTF2	-2.69081	0.142	0.251	0	0
Sertoli cells	AC073114.1	-2.74121	0.056	0.138	1.26636e-173	4.52001e-169
Sertoli cells	ST6GAL1	-2.74438	0.036	0.118	1.94664e-138	6.94814e-134
Sertoli cells	AC145124.1	-2.77163	0.038	0.113	5.61412e-130	2.00385e-125
Sertoli cells	CD22	-2.77532	0.056	0.17	1.14203e-208	4.07626e-204
Sertoli cells	PTPRH	-2.8024	0.04	0.108	3.65768e-121	1.30554e-116
Sertoli cells	CDH12	-2.82069	0.068	0.11	5.64217e-229	2.01386e-224
Sertoli cells	TMEM51	-2.83784	0.041	0.106	5.38127e-131	1.92074e-126
Sertoli cells	LRRC4C	-2.84984	0.077	0.137	1.17119e-256	4.18034e-252
Sertoli cells	NFKB2	-2.8582	0.041	0.111	5.82759e-138	2.08004e-133
Sertoli cells	JAK3	-2.86419	0.038	0.102	5.69185e-125	2.03159e-120
Sertoli cells	VEGFA	-2.93108	0.052	0.106	2.53135e-190	9.03515e-186
Sertoli cells	ERV3-1	-2.96416	0.251	0.475	0	0
Sertoli cells	CACNA1A	-2.96777	0.073	0.141	6.08903e-231	2.17336e-226
Sertoli cells	TACC2	-2.96958	0.042	0.102	4.91448e-127	1.75413e-122
Sertoli cells	AC245060.5	-2.98715	0.24	0.323	0	0
Sertoli cells	ADCYAP1	-3.01898	0.02	0.101	2.56041e-150	9.13886e-146
Sertoli cells	CARNMT1-AS1	-3.03535	0.049	0.115	1.30258e-156	4.64931e-152
Sertoli cells	AMPD3	-3.05069	0.052	0.176	4.25045e-240	1.51711e-235
Sertoli cells	MYO1E	-3.06941	0.072	0.198	1.96408e-291	7.0104e-287
Sertoli cells	CDH13	-3.10522	0.065	0.137	8.87506e-246	3.16777e-241
Sertoli cells	CCDC26	-3.14186	0.046	0.101	4.7543e-197	1.69695e-192
Sertoli cells	LRP1B	-3.38386	0.078	0.186	0	0
Sertoli cells	CLIP2	-3.42871	0.037	0.13	1.73752e-186	6.20173e-182
Sertoli cells	CNTN5	-3.44343	0.053	0.134	2.7218e-273	9.71493e-269
Sertoli cells	ZNF841	-3.46521	0.066	0.191	0	0
Sertoli cells	RBFOX1	-3.4807	0.138	0.339	0	0
Sertoli cells	PPP2R2C	-3.50929	0.02	0.109	2.2767e-173	8.12624e-169
Sertoli cells	AL627171.2	-3.92151	0.134	0.422	0	0
Sertoli cells	AC115282.2	-4.02994	0.025	0.166	0	0
Sertoli cells	PLCG2	-4.26634	0.162	0.539	0	0
Sertoli cells	LUCAT1	-4.84031	0.028	0.251	0	0
Macrophages 2 (M2)	RPS23	10.2331	0.172	0	2.07903e-20	7.4207e-16
Macrophages 2 (M2)	PRND	7.09661	0.151	0.003	1.58333e-15	5.6514e-11
Macrophages 2 (M2)	IFI44L	6.70658	0.239	0.003	9.21492e-26	3.28908e-21
Macrophages 2 (M2)	ALKBH7	6.63663	0.102	0.003	4.02863e-10	1.43794e-05
Macrophages 2 (M2)	AC105402.3	5.21466	0.177	0.01	5.66455e-16	2.02185e-11
Macrophages 2 (M2)	SELENOS	5.07483	0.101	0.007	8.21675e-09	0.000293281
Macrophages 2 (M2)	CD81	4.8326	0.123	0.007	5.64241e-11	2.01395e-06
Macrophages 2 (M2)	RPLP1	4.44926	0.331	0.017	4.53676e-32	1.6193e-27
Macrophages 2 (M2)	SPARC	4.3244	0.267	0.021	4.32057e-23	1.54214e-18
Macrophages 2 (M2)	HLA-A	4.25812	0.153	0.014	2.87297e-12	1.02545e-07
Macrophages 2 (M2)	RPL15	4.18945	0.218	0.017	1.49262e-18	5.32761e-14
Macrophages 2 (M2)	RPL35A	4.11123	0.149	0.017	1.04931e-11	3.74532e-07
Macrophages 2 (M2)	SPATA22	4.07459	0.139	0.014	7.71504e-11	2.75373e-06
Macrophages 2 (M2)	ATP5IF1	3.98969	0.125	0.007	4.63317e-11	1.65372e-06
Macrophages 2 (M2)	TUBA1B	3.95523	0.118	0.017	2.64241e-08	0.000943156
Macrophages 2 (M2)	MIR202HG	3.88325	0.237	0.027	2.51932e-18	8.99219e-14
Macrophages 2 (M2)	PRPS2	3.86734	0.211	0.014	1.64626e-18	5.87601e-14
Macrophages 2 (M2)	SLFN11	3.84859	0.101	0.014	2.59906e-07	0.00927682
Macrophages 2 (M2)	SERPINA5	3.83204	0.222	0.014	1.21386e-19	4.33261e-15
Macrophages 2 (M2)	CST3	3.6965	0.298	0.034	1.01615e-23	3.62693e-19
Macrophages 2 (M2)	MTX2	3.6927	0.203	0.017	1.74327e-16	6.22224e-12
Macrophages 2 (M2)	SAMD9L	3.68218	0.158	0.017	4.52434e-12	1.61487e-07
Macrophages 2 (M2)	RNF141	3.67736	0.101	0.007	1.57899e-08	0.000563587
Macrophages 2 (M2)	PTPRC	3.66039	0.454	0.072	9.38702e-36	3.35051e-31
Macrophages 2 (M2)	HIST1H2AA	3.62185	0.135	0.007	2.16024e-12	7.71055e-08
Macrophages 2 (M2)	ORMDL1	3.58919	0.199	0.027	5.64455e-14	2.01471e-09
Macrophages 2 (M2)	ILDR2	3.5882	0.14	0.01	1.15861e-11	4.13542e-07
Macrophages 2 (M2)	AL160272.1	3.57009	0.135	0.014	3.34162e-10	1.19272e-05
Macrophages 2 (M2)	RPS11	3.54891	0.175	0.031	1.26377e-11	4.51078e-07
Macrophages 2 (M2)	ST3GAL6	3.53124	0.137	0.007	1.23223e-12	4.3982e-08
Macrophages 2 (M2)	AL390728.6	3.51572	0.102	0.017	1.08484e-06	0.0387213
Macrophages 2 (M2)	HMGN2	3.48135	0.114	0.021	3.62535e-07	0.01294
Macrophages 2 (M2)	GSTM3	3.48102	0.168	0.014	1.22786e-13	4.3826e-09
Macrophages 2 (M2)	LYPLAL1	3.47369	0.191	0.021	3.27206e-14	1.16789e-09
Macrophages 2 (M2)	RPS20	3.46581	0.187	0.014	8.65679e-16	3.08987e-11
Macrophages 2 (M2)	EPPIN	3.46547	0.114	0.003	1.32188e-11	4.71819e-07
Macrophages 2 (M2)	RPS21	3.38818	0.166	0.021	3.06866e-12	1.0953e-07
Macrophages 2 (M2)	COX4I1	3.30726	0.101	0.01	1.35163e-07	0.00482437
Macrophages 2 (M2)	H2AFJ	3.28732	0.172	0.034	1.2758e-10	4.55371e-06
Macrophages 2 (M2)	CMTM2	3.26279	0.116	0.01	3.41012e-09	0.000121717
Macrophages 2 (M2)	C5orf58	3.26061	0.14	0.017	4.28021e-10	1.52774e-05
Macrophages 2 (M2)	IFI44	3.24016	0.25	0.038	4.5064e-17	1.60847e-12
Macrophages 2 (M2)	CD47	3.22993	0.154	0.024	6.2176e-10	2.21925e-05
Macrophages 2 (M2)	MSMO1	3.22413	0.109	0.01	1.87409e-08	0.000668918
Macrophages 2 (M2)	BBIP1	3.20589	0.101	0.01	1.32229e-07	0.00471964
Macrophages 2 (M2)	ZNF711	3.19096	0.127	0.007	1.14049e-11	4.07074e-07
Macrophages 2 (M2)	FAU	3.19061	0.116	0.014	1.56699e-08	0.000559307
Macrophages 2 (M2)	EEF1A1	3.14697	0.567	0.093	8.84856e-47	3.15832e-42
Macrophages 2 (M2)	PTAR1	3.10292	0.225	0.038	1.03449e-14	3.69242e-10
Macrophages 2 (M2)	SS18	3.0968	0.298	0.048	1.85294e-20	6.6137e-16
Macrophages 2 (M2)	PAPSS1	3.07861	0.147	0.021	7.59804e-10	2.71197e-05
Macrophages 2 (M2)	RPL7A	3.06391	0.177	0.038	1.35431e-10	4.83395e-06
Macrophages 2 (M2)	RPL18	3.05515	0.128	0.024	8.2695e-08	0.00295163
Macrophages 2 (M2)	LINC01921	3.04249	0.116	0.007	1.58517e-10	5.65796e-06
Macrophages 2 (M2)	SRSF6	3.00487	0.114	0.021	7.22159e-07	0.025776
Macrophages 2 (M2)	PRM1	2.9975	0.369	0.124	2.86805e-26	1.02369e-21
Macrophages 2 (M2)	RPS18	2.98725	0.185	0.024	7.80994e-13	2.7876e-08
Macrophages 2 (M2)	RBAKDN	2.95545	0.125	0.007	4.10727e-11	1.46601e-06
Macrophages 2 (M2)	TUBB4B	2.93955	0.172	0.031	1.76109e-10	6.28587e-06
Macrophages 2 (M2)	TMX4	2.91607	0.213	0.017	9.91733e-18	3.53979e-13
Macrophages 2 (M2)	TSACC	2.90848	0.142	0.014	5.01222e-11	1.78901e-06
Macrophages 2 (M2)	PTGDS	2.90839	0.525	0.062	2.095e-46	7.47768e-42
Macrophages 2 (M2)	NUS1	2.90208	0.13	0.024	1.00097e-07	0.00357275
Macrophages 2 (M2)	CPEB2	2.88137	0.276	0.045	4.02294e-18	1.43591e-13
Macrophages 2 (M2)	STMN1	2.87703	0.133	0.021	1.44516e-08	0.000515819
Macrophages 2 (M2)	CPNE1	2.87557	0.12	0.021	2.79194e-07	0.00996526
Macrophages 2 (M2)	GCA	2.86431	0.147	0.024	3.75849e-09	0.000134152
Macrophages 2 (M2)	PWWP3B	2.83796	0.13	0.01	9.01976e-11	3.21942e-06
Macrophages 2 (M2)	RPL34	2.82313	0.165	0.017	2.09457e-12	7.47614e-08
Macrophages 2 (M2)	FANCL	2.80843	0.182	0.024	8.86277e-13	3.16339e-08
Macrophages 2 (M2)	FAR1	2.78667	0.369	0.069	3.93406e-24	1.40418e-19
Macrophages 2 (M2)	RPL10	2.78569	0.187	0.024	5.17637e-13	1.8476e-08
Macrophages 2 (M2)	RPL23	2.77431	0.133	0.031	1.85832e-07	0.0066329
Macrophages 2 (M2)	PRDX6	2.73626	0.149	0.027	6.70836e-09	0.000239442
Macrophages 2 (M2)	CALM2	2.72059	0.296	0.065	2.41023e-17	8.60284e-13
Macrophages 2 (M2)	ZDHHC21	2.71755	0.267	0.038	2.18813e-18	7.81011e-14
Macrophages 2 (M2)	CYBB	2.67818	0.258	0.052	5.35146e-15	1.9101e-10
Macrophages 2 (M2)	SERPINF1	2.66893	0.116	0.017	1.55576e-07	0.00555299
Macrophages 2 (M2)	RPL37A	2.66881	0.385	0.072	1.11104e-24	3.96563e-20
Macrophages 2 (M2)	HERPUD1	2.66742	0.227	0.048	1.22632e-12	4.37711e-08
Macrophages 2 (M2)	CD164	2.65209	0.237	0.038	3.33026e-15	1.18867e-10
Macrophages 2 (M2)	RPL8	2.64008	0.153	0.024	1.21453e-09	4.33503e-05
Macrophages 2 (M2)	PDGFC	2.62789	0.437	0.079	1.34678e-29	4.80705e-25
Macrophages 2 (M2)	CLEC2D	2.62293	0.251	0.034	1.98952e-17	7.10118e-13
Macrophages 2 (M2)	RPLP0	2.61859	0.121	0.024	8.55115e-07	0.0305216
Macrophages 2 (M2)	BSG	2.61337	0.182	0.021	1.57023e-13	5.60461e-09
Macrophages 2 (M2)	NABP1	2.61091	0.177	0.045	9.00971e-09	0.000321584
Macrophages 2 (M2)	IL18	2.6075	0.146	0.027	2.68956e-08	0.000959985
Macrophages 2 (M2)	A2M	2.60586	0.135	0.017	2.32567e-09	8.30103e-05
Macrophages 2 (M2)	IGF1	2.60148	0.107	0.017	9.83142e-07	0.0350913
Macrophages 2 (M2)	TNP1	2.57932	0.328	0.089	7.05721e-17	2.51893e-12
Macrophages 2 (M2)	C5orf47	2.57875	0.118	0.017	1.07001e-07	0.00381919
Macrophages 2 (M2)	ZNF718	2.57683	0.165	0.027	4.39661e-10	1.56928e-05
Macrophages 2 (M2)	RPS14	2.57605	0.165	0.021	1.10096e-11	3.92964e-07
Macrophages 2 (M2)	DPY19L2	2.56532	0.14	0.021	3.95672e-09	0.000141227
Macrophages 2 (M2)	SPRED1	2.55865	0.459	0.093	2.05387e-30	7.33089e-26
Macrophages 2 (M2)	TPT1	2.54795	0.256	0.058	2.65824e-14	9.48807e-10
Macrophages 2 (M2)	PARP8	2.54001	0.364	0.117	1.06953e-16	3.81748e-12
Macrophages 2 (M2)	AP1S2	2.53376	0.182	0.034	1.77575e-10	6.3382e-06
Macrophages 2 (M2)	TMSB4X	2.53106	0.198	0.038	2.40264e-11	8.57575e-07
Macrophages 2 (M2)	WWP1	2.53053	0.464	0.093	4.51486e-31	1.61149e-26
Macrophages 2 (M2)	TMSB10	2.52724	0.25	0.034	2.27091e-17	8.10556e-13
Macrophages 2 (M2)	RPS25	2.52353	0.142	0.031	1.24524e-07	0.00444465
Macrophages 2 (M2)	EMB	2.52262	0.291	0.045	1.55636e-19	5.55511e-15
Macrophages 2 (M2)	TNFAIP2	2.5212	0.146	0.034	2.6933e-07	0.00961321
Macrophages 2 (M2)	RPL37	2.51444	0.165	0.045	6.39354e-08	0.00228205
Macrophages 2 (M2)	SLC35B3	2.51435	0.109	0.017	6.75338e-07	0.0241049
Macrophages 2 (M2)	C5orf17	2.51116	0.331	0.052	1.34073e-22	4.78546e-18
Macrophages 2 (M2)	ATP1B1	2.51023	0.128	0.027	5.96045e-07	0.0212746
Macrophages 2 (M2)	ZNF678	2.50432	0.147	0.031	6.21964e-08	0.00221998
Macrophages 2 (M2)	CPE	2.49595	0.194	0.034	1.52461e-11	5.44179e-07
Macrophages 2 (M2)	SERPINB6	2.49493	0.185	0.048	4.11366e-09	0.000146829
Macrophages 2 (M2)	PDK4	2.48701	0.374	0.127	4.14162e-17	1.47827e-12
Macrophages 2 (M2)	RPL26	2.48676	0.151	0.024	2.10206e-09	7.50289e-05
Macrophages 2 (M2)	RPL24	2.48566	0.109	0.017	6.72169e-07	0.0239917
Macrophages 2 (M2)	RBBP7	2.48372	0.107	0.017	9.76994e-07	0.0348719
Macrophages 2 (M2)	OGFRL1	2.47814	0.189	0.045	1.33831e-09	4.77684e-05
Macrophages 2 (M2)	RPL41	2.47496	0.276	0.045	7.73514e-18	2.7609e-13
Macrophages 2 (M2)	YBX2	2.46884	0.12	0.014	8.15437e-09	0.000291054
Macrophages 2 (M2)	PRKAR1A	2.46869	0.149	0.031	5.08602e-08	0.00181535
Macrophages 2 (M2)	RPS27	2.46817	0.213	0.055	9.2295e-11	3.29429e-06
Macrophages 2 (M2)	CYP51A1	2.45819	0.13	0.017	6.99343e-09	0.000249616
Macrophages 2 (M2)	RPS3A	2.45454	0.213	0.024	1.96562e-16	7.01589e-12
Macrophages 2 (M2)	RPS27A	2.44542	0.147	0.024	4.51199e-09	0.000161047
Macrophages 2 (M2)	REXO5	2.42874	0.137	0.027	1.24213e-07	0.00443353
Macrophages 2 (M2)	MT-ND3	2.42535	0.971	0.323	1.2824e-106	4.57727e-102
Macrophages 2 (M2)	TMEM65	2.42142	0.189	0.045	9.11584e-10	3.25372e-05
Macrophages 2 (M2)	TTC14	2.41576	0.225	0.055	3.04077e-11	1.08534e-06
Macrophages 2 (M2)	CMAS	2.40563	0.123	0.014	3.88838e-09	0.000138788
Macrophages 2 (M2)	HACE1	2.405	0.201	0.041	3.53566e-11	1.26198e-06
Macrophages 2 (M2)	MFF	2.40444	0.187	0.052	5.99104e-09	0.000213838
Macrophages 2 (M2)	RPL30	2.40413	0.13	0.021	3.90854e-08	0.00139507
Macrophages 2 (M2)	ETNK1	2.4001	0.444	0.079	1.29054e-30	4.60631e-26
Macrophages 2 (M2)	LINC00278	2.39779	0.456	0.103	1.29371e-27	4.61765e-23
Macrophages 2 (M2)	UBA52	2.39077	0.175	0.027	4.76621e-11	1.7012e-06
Macrophages 2 (M2)	MTF2	2.39039	0.208	0.052	3.23282e-10	1.15389e-05
Macrophages 2 (M2)	PRKACB	2.38926	0.179	0.038	1.1962e-09	4.26958e-05
Macrophages 2 (M2)	PPM1A	2.38875	0.154	0.031	1.6057e-08	0.000573122
Macrophages 2 (M2)	CLU	2.3811	0.638	0.113	3.39074e-52	1.21026e-47
Macrophages 2 (M2)	PTEN	2.37781	0.567	0.148	4.32079e-35	1.54222e-30
Macrophages 2 (M2)	YTHDC2	2.37738	0.295	0.062	1.2187e-16	4.34991e-12
Macrophages 2 (M2)	NUTM2A-AS1	2.3748	0.158	0.014	2.70326e-13	9.64873e-09
Macrophages 2 (M2)	SIGLEC1	2.37069	0.27	0.079	1.36855e-12	4.88477e-08
Macrophages 2 (M2)	ACTB	2.36819	0.419	0.079	2.52229e-27	9.00281e-23
Macrophages 2 (M2)	CA8	2.36003	0.121	0.017	4.97486e-08	0.00177568
Macrophages 2 (M2)	RPS12	2.35611	0.184	0.031	3.40267e-11	1.21451e-06
Macrophages 2 (M2)	PPM1K	2.35484	0.12	0.021	2.9858e-07	0.0106572
Macrophages 2 (M2)	TLR4	2.34649	0.147	0.034	1.97184e-07	0.00703807
Macrophages 2 (M2)	ATP1A1	2.34616	0.229	0.052	6.81108e-12	2.43108e-07
Macrophages 2 (M2)	TMEM168	2.34415	0.142	0.027	5.96731e-08	0.00212991
Macrophages 2 (M2)	MT-CO3	2.33642	0.976	0.381	8.32316e-102	2.97079e-97
Macrophages 2 (M2)	PLSCR1	2.3313	0.282	0.076	1.3783e-13	4.91957e-09
Macrophages 2 (M2)	RASSF4	2.33076	0.21	0.038	2.12248e-12	7.57577e-08
Macrophages 2 (M2)	GAS6	2.32768	0.227	0.052	5.36611e-12	1.91533e-07
Macrophages 2 (M2)	SNX13	2.32331	0.496	0.127	1.14515e-29	4.08737e-25
Macrophages 2 (M2)	SLC25A36	2.31906	0.237	0.058	7.56691e-12	2.70086e-07
Macrophages 2 (M2)	HLTF	2.3171	0.199	0.038	1.98887e-11	7.09888e-07
Macrophages 2 (M2)	AC004936.1	2.31465	0.113	0.014	4.26041e-08	0.00152067
Macrophages 2 (M2)	USP53	2.31366	0.367	0.093	2.54494e-19	9.08366e-15
Macrophages 2 (M2)	HMGCS1	2.31324	0.125	0.021	1.12754e-07	0.00402453
Macrophages 2 (M2)	ODR4	2.3099	0.168	0.038	1.435e-08	0.000512193
Macrophages 2 (M2)	SESN3	2.30336	0.163	0.027	6.79313e-10	2.42467e-05
Macrophages 2 (M2)	RPS28	2.29961	0.192	0.055	1.40897e-08	0.000502904
Macrophages 2 (M2)	RPL31	2.29816	0.133	0.031	1.04683e-06	0.0373645
Macrophages 2 (M2)	CLCN5	2.28832	0.156	0.027	3.17586e-09	0.000113356
Macrophages 2 (M2)	BTG3	2.28648	0.102	0.014	5.39315e-07	0.0192498
Macrophages 2 (M2)	RPLP2	2.27638	0.22	0.034	1.90736e-14	6.80794e-10
Macrophages 2 (M2)	JAK2	2.26859	0.456	0.113	3.52235e-26	1.25723e-21
Macrophages 2 (M2)	ALDH1A1	2.26427	0.177	0.038	2.4382e-09	8.70267e-05
Macrophages 2 (M2)	RMDN1	2.26096	0.154	0.021	9.45829e-11	3.37595e-06
Macrophages 2 (M2)	MRPL3	2.24311	0.142	0.038	1.27432e-06	0.0454844
Macrophages 2 (M2)	PRM2	2.23793	0.369	0.124	7.61207e-17	2.71698e-12
Macrophages 2 (M2)	RPL5	2.23522	0.185	0.048	1.08372e-08	0.000386811
Macrophages 2 (M2)	PSMB7	2.22574	0.146	0.021	1.29329e-09	4.61613e-05
Macrophages 2 (M2)	TMBIM4	2.22558	0.25	0.058	7.77092e-13	2.77368e-08
Macrophages 2 (M2)	CLEC7A	2.22352	0.208	0.041	1.37227e-11	4.89805e-07
Macrophages 2 (M2)	HMGB4	2.2196	0.17	0.027	1.0773e-10	3.8452e-06
Macrophages 2 (M2)	PLSCR4	2.21917	0.132	0.021	2.12448e-08	0.000758289
Macrophages 2 (M2)	GPX4	2.21019	0.206	0.045	2.74652e-11	9.80317e-07
Macrophages 2 (M2)	EIF1	2.20842	0.205	0.034	1.32756e-12	4.73847e-08
Macrophages 2 (M2)	RPL38	2.20788	0.21	0.034	1.95984e-13	6.99527e-09
Macrophages 2 (M2)	AL392172.1	2.20624	0.144	0.027	4.20004e-08	0.00149912
Macrophages 2 (M2)	MICU3	2.20387	0.175	0.034	9.85943e-10	3.51913e-05
Macrophages 2 (M2)	ALG13	2.20109	0.239	0.052	5.24447e-13	1.87191e-08
Macrophages 2 (M2)	GLS	2.19733	0.329	0.089	4.72161e-16	1.68528e-11
Macrophages 2 (M2)	WDR26	2.19332	0.366	0.127	1.71888e-15	6.13521e-11
Macrophages 2 (M2)	PIWIL1	2.18508	0.114	0.014	1.07272e-08	0.000382888
Macrophages 2 (M2)	RPL19	2.18364	0.139	0.027	1.21059e-07	0.00432094
Macrophages 2 (M2)	LDLRAD4	2.18289	0.728	0.251	1.12285e-44	4.0078e-40
Macrophages 2 (M2)	LAPTM4A	2.18107	0.253	0.055	1.43285e-13	5.11428e-09
Macrophages 2 (M2)	RPL17	2.17914	0.177	0.041	9.87475e-09	0.000352459
Macrophages 2 (M2)	ATP5MD	2.17657	0.101	0.014	7.32798e-07	0.0261558
Macrophages 2 (M2)	SERF2	2.17558	0.163	0.038	4.31988e-08	0.00154189
Macrophages 2 (M2)	RPL21	2.16555	0.147	0.031	6.6854e-08	0.00238622
Macrophages 2 (M2)	MT-ATP6	2.16356	0.922	0.316	2.84062e-83	1.0139e-78
Macrophages 2 (M2)	CHMP3	2.15705	0.127	0.027	1.26117e-06	0.0450148
Macrophages 2 (M2)	IKZF1	2.15359	0.231	0.072	1.2768e-09	4.55729e-05
Macrophages 2 (M2)	CD74	2.15223	0.194	0.052	5.9206e-09	0.000211324
Macrophages 2 (M2)	RGS1	2.14722	0.288	0.093	5.15443e-12	1.83977e-07
Macrophages 2 (M2)	ARL5A	2.14692	0.114	0.021	1.04859e-06	0.0374272
Macrophages 2 (M2)	EPSTI1	2.14645	0.27	0.062	4.99699e-14	1.78357e-09
Macrophages 2 (M2)	TENT2	2.13878	0.544	0.158	3.25917e-30	1.16329e-25
Macrophages 2 (M2)	UBE2E3	2.12532	0.303	0.072	9.76572e-16	3.48568e-11
Macrophages 2 (M2)	ZNF736	2.11958	0.156	0.048	1.2673e-06	0.0452337
Macrophages 2 (M2)	SELENOP	2.11697	0.263	0.062	2.0448e-13	7.29852e-09
Macrophages 2 (M2)	PICALM	2.1154	0.672	0.182	6.36535e-44	2.27198e-39
Macrophages 2 (M2)	RPS7	2.11093	0.154	0.034	6.5317e-08	0.00233136
Macrophages 2 (M2)	RPL3	2.11058	0.246	0.058	2.44131e-12	8.71377e-08
Macrophages 2 (M2)	ANKRD50	2.09644	0.13	0.014	3.6464e-10	1.30151e-05
Macrophages 2 (M2)	MS4A4E	2.09399	0.215	0.027	1.50284e-15	5.3641e-11
Macrophages 2 (M2)	LPCAT2	2.09208	0.173	0.024	3.46238e-12	1.23583e-07
Macrophages 2 (M2)	RPL9	2.08911	0.196	0.041	1.90245e-10	6.7904e-06
Macrophages 2 (M2)	USP15	2.08905	0.629	0.175	1.01418e-38	3.61991e-34
Macrophages 2 (M2)	ATF2	2.07447	0.274	0.048	6.01243e-17	2.14602e-12
Macrophages 2 (M2)	SUCO	2.06986	0.243	0.034	4.87006e-17	1.73827e-12
Macrophages 2 (M2)	SRP14	2.0623	0.123	0.024	7.19675e-07	0.0256873
Macrophages 2 (M2)	ENOX2	2.06124	0.291	0.065	1.6539e-15	5.90325e-11
Macrophages 2 (M2)	NT5DC1	2.05452	0.241	0.055	2.37512e-12	8.4775e-08
Macrophages 2 (M2)	AASS	2.05404	0.106	0.017	1.09723e-06	0.0391636
Macrophages 2 (M2)	RNF13	2.05154	0.482	0.12	1.80289e-27	6.43507e-23
Macrophages 2 (M2)	RPL29	2.0408	0.121	0.021	1.8707e-07	0.0066771
Macrophages 2 (M2)	PABPN1	2.0383	0.201	0.062	4.0338e-08	0.00143978
Macrophages 2 (M2)	CHM	2.03172	0.182	0.045	1.12208e-08	0.000400504
Macrophages 2 (M2)	HMGN5	2.02977	0.125	0.021	6.97897e-08	0.002491
Macrophages 2 (M2)	TLE4	2.02862	0.383	0.107	8.8148e-19	3.14627e-14
Macrophages 2 (M2)	ZNF75D	2.0257	0.116	0.017	1.02616e-07	0.00366268
Macrophages 2 (M2)	RTN4	2.0236	0.39	0.113	1.90002e-18	6.78173e-14
Macrophages 2 (M2)	URI1	2.01833	0.31	0.052	8.36389e-21	2.98532e-16
Macrophages 2 (M2)	MEF2A	2.01786	0.653	0.206	6.88483e-38	2.4574e-33
Macrophages 2 (M2)	TMEM106B	2.01729	0.102	0.014	2.4551e-07	0.00876298
Macrophages 2 (M2)	NRIP1	2.01376	0.404	0.096	3.5826e-22	1.27874e-17
Macrophages 2 (M2)	EEF2	2.00985	0.192	0.048	4.59485e-09	0.000164004
Macrophages 2 (M2)	DCN	2.00882	0.185	0.027	5.33032e-13	1.90255e-08
Macrophages 2 (M2)	SYCP2	2.00827	0.17	0.045	1.10242e-07	0.00393488
Macrophages 2 (M2)	DMTF1	2.00745	0.308	0.079	2.7599e-15	9.8509e-11
Macrophages 2 (M2)	CEPT1	2.00493	0.218	0.048	1.91774e-11	6.84498e-07
Macrophages 2 (M2)	CACNA1B	-2.00767	0.081	0.134	6.25336e-07	0.0223201
Macrophages 2 (M2)	FGF12	-2.01971	0.092	0.158	9.47502e-08	0.00338192
Macrophages 2 (M2)	EYS	-2.05414	0.151	0.285	2.12506e-14	7.58499e-10
Macrophages 2 (M2)	NKAIN2	-2.07393	0.106	0.179	2.7188e-09	9.70421e-05
Macrophages 2 (M2)	SYN3	-2.07869	0.09	0.172	7.84558e-08	0.00280032
Macrophages 2 (M2)	CDH12	-2.0809	0.088	0.134	2.21886e-07	0.00791976
Macrophages 2 (M2)	LINC02240	-2.10427	0.088	0.172	1.09738e-07	0.00391689
Macrophages 2 (M2)	ACOXL	-2.12446	0.08	0.144	3.32353e-07	0.0118627
Macrophages 2 (M2)	DAB1	-2.14354	0.133	0.251	4.21758e-12	1.50538e-07
Macrophages 2 (M2)	PCAT1	-2.16189	0.087	0.162	1.04879e-08	0.000374345
Macrophages 2 (M2)	SGCD	-2.16504	0.08	0.189	9.72559e-10	3.47135e-05
Macrophages 2 (M2)	DCC	-2.20036	0.078	0.21	1.37383e-09	4.90361e-05
Macrophages 2 (M2)	ARSG	-2.20192	0.08	0.107	6.2421e-07	0.0222799
Macrophages 2 (M2)	CTNND2	-2.25001	0.113	0.192	1.26821e-11	4.52663e-07
Macrophages 2 (M2)	GTF2IRD1	-2.2514	0.081	0.175	8.20857e-09	0.000292989
Macrophages 2 (M2)	FMN2	-2.28224	0.08	0.151	1.18054e-06	0.0421369
Macrophages 2 (M2)	NELL1	-2.30727	0.071	0.158	7.56776e-08	0.00270116
Macrophages 2 (M2)	BANK1	-2.33188	0.09	0.148	2.95777e-08	0.00105572
Macrophages 2 (M2)	PTCHD1-AS	-2.33632	0.062	0.124	3.32031e-07	0.0118512
Macrophages 2 (M2)	ANKFN1	-2.33756	0.054	0.127	1.2863e-06	0.0459119
Macrophages 2 (M2)	NTM	-2.35816	0.061	0.189	4.68991e-10	1.67397e-05
Macrophages 2 (M2)	KIAA1671	-2.45678	0.073	0.131	7.44321e-07	0.0265671
Macrophages 2 (M2)	PTPRD	-2.47992	0.165	0.388	5.49654e-23	1.96188e-18
Macrophages 2 (M2)	KAZN	-2.49325	0.121	0.316	1.86716e-16	6.66445e-12
Macrophages 2 (M2)	CNTN5	-2.49597	0.09	0.192	8.57003e-12	3.0589e-07
Macrophages 2 (M2)	CACNA1D	-2.51066	0.059	0.134	6.01606e-07	0.0214731
Macrophages 2 (M2)	AC007402.1	-2.52409	0.085	0.213	1.32567e-11	4.73171e-07
Macrophages 2 (M2)	LINC00486	-2.52573	0.217	0.464	3.14476e-28	1.12246e-23
Macrophages 2 (M2)	LINC01320	-2.5413	0.107	0.22	2.03673e-14	7.26971e-10
Macrophages 2 (M2)	DSCAM	-2.54714	0.083	0.196	5.15492e-11	1.83995e-06
Macrophages 2 (M2)	DNAH3	-2.55268	0.078	0.192	5.13012e-10	1.83109e-05
Macrophages 2 (M2)	TENM2	-2.58016	0.085	0.216	3.50685e-12	1.2517e-07
Macrophages 2 (M2)	SPRY4-AS1	-2.58257	0.054	0.113	6.23666e-07	0.0222605
Macrophages 2 (M2)	SEC24A	-2.60602	0.066	0.148	4.48824e-07	0.0160199
Macrophages 2 (M2)	ALK	-2.60628	0.057	0.148	3.61901e-07	0.0129173
Macrophages 2 (M2)	LINC01090	-2.6409	0.052	0.148	3.13212e-08	0.00111795
Macrophages 2 (M2)	NRG1	-2.64221	0.116	0.261	6.39238e-15	2.28163e-10
Macrophages 2 (M2)	SNTG1	-2.65372	0.05	0.134	5.27678e-07	0.0188344
Macrophages 2 (M2)	CCDC26	-2.6617	0.049	0.186	2.05795e-10	7.34545e-06
Macrophages 2 (M2)	AC007389.1	-2.67863	0.076	0.223	3.49269e-12	1.24665e-07
Macrophages 2 (M2)	LINC01505	-2.69141	0.05	0.141	1.64138e-07	0.00585858
Macrophages 2 (M2)	PTPRT	-2.69425	0.088	0.247	1.20632e-13	4.30571e-09
Macrophages 2 (M2)	IQCJ-SCHIP1	-2.70398	0.052	0.141	2.37676e-07	0.00848335
Macrophages 2 (M2)	LRRTM4	-2.7226	0.038	0.12	3.49133e-07	0.0124616
Macrophages 2 (M2)	PCDH15	-2.72448	0.094	0.254	1.28062e-14	4.57092e-10
Macrophages 2 (M2)	CLIP2	-2.72713	0.062	0.168	1.40621e-08	0.000501918
Macrophages 2 (M2)	AL138720.1	-2.7497	0.057	0.182	2.24703e-10	8.02032e-06
Macrophages 2 (M2)	DNAH9	-2.78083	0.055	0.141	3.95447e-07	0.0141147
Macrophages 2 (M2)	CACNA1A	-2.79118	0.12	0.282	1.71069e-20	6.10595e-16
Macrophages 2 (M2)	SLIT3	-2.85316	0.047	0.12	9.63966e-07	0.0344068
Macrophages 2 (M2)	ADAMTSL1	-2.85537	0.054	0.172	4.36764e-10	1.55894e-05
Macrophages 2 (M2)	KSR2	-2.88075	0.05	0.165	1.65778e-10	5.91712e-06
Macrophages 2 (M2)	KIF26B	-2.88278	0.064	0.165	3.9092e-09	0.000139531
Macrophages 2 (M2)	AL445250.1	-2.9306	0.045	0.124	1.92952e-07	0.00688703
Macrophages 2 (M2)	AC078923.1	-2.9412	0.043	0.117	3.43337e-08	0.00122547
Macrophages 2 (M2)	AC034268.2	-2.95731	0.08	0.234	5.78491e-16	2.06481e-11
Macrophages 2 (M2)	TET1	-2.97851	0.036	0.117	6.44996e-07	0.0230218
Macrophages 2 (M2)	AC013652.1	-2.98698	0.04	0.12	1.1642e-06	0.0415539
Macrophages 2 (M2)	CNTNAP2	-3.00435	0.137	0.381	1.20858e-30	4.31378e-26
Macrophages 2 (M2)	HECW1	-3.00783	0.042	0.103	6.93313e-07	0.0247464
Macrophages 2 (M2)	SEMA3A	-3.01214	0.05	0.162	7.63325e-11	2.72453e-06
Macrophages 2 (M2)	AL157944.1	-3.01496	0.029	0.107	1.21855e-06	0.0434935
Macrophages 2 (M2)	DOK6	-3.03128	0.042	0.141	5.58965e-09	0.000199511
Macrophages 2 (M2)	AC097518.2	-3.03769	0.04	0.113	4.24185e-08	0.00151405
Macrophages 2 (M2)	CSMD2	-3.04137	0.026	0.12	8.54875e-08	0.00305131
Macrophages 2 (M2)	FSTL5	-3.04476	0.054	0.155	6.37811e-10	2.27654e-05
Macrophages 2 (M2)	ERC2	-3.06083	0.052	0.192	2.09495e-13	7.4775e-09
Macrophages 2 (M2)	AC092100.1	-3.06236	0.05	0.148	1.90781e-09	6.80953e-05
Macrophages 2 (M2)	NTN1	-3.07412	0.033	0.103	7.78825e-07	0.0277986
Macrophages 2 (M2)	DGKB	-3.08631	0.055	0.165	3.59951e-11	1.28477e-06
Macrophages 2 (M2)	ASIC2	-3.10019	0.033	0.137	6.55983e-09	0.00023414
Macrophages 2 (M2)	GRIK4	-3.11542	0.035	0.107	5.64e-07	0.0201309
Macrophages 2 (M2)	GPM6A	-3.14969	0.029	0.127	1.39965e-08	0.000499577
Macrophages 2 (M2)	CUX2	-3.15278	0.049	0.131	3.69876e-09	0.00013202
Macrophages 2 (M2)	RALYL	-3.16227	0.045	0.155	1.86316e-09	6.65017e-05
Macrophages 2 (M2)	LUZP2	-3.16949	0.024	0.107	7.02117e-07	0.0250607
Macrophages 2 (M2)	SHANK2	-3.20994	0.057	0.196	6.97694e-14	2.49028e-09
Macrophages 2 (M2)	ANO3	-3.22468	0.029	0.11	4.17261e-07	0.0148933
Macrophages 2 (M2)	LRRC4C	-3.2258	0.057	0.268	6.84159e-20	2.44197e-15
Macrophages 2 (M2)	CDH4	-3.23798	0.033	0.127	6.31388e-08	0.00225361
Macrophages 2 (M2)	GSG1L	-3.26472	0.035	0.134	1.16041e-08	0.000414187
Macrophages 2 (M2)	AGBL1	-3.27414	0.05	0.186	4.20464e-15	1.50076e-10
Macrophages 2 (M2)	RELN	-3.33812	0.04	0.131	4.20644e-09	0.00015014
Macrophages 2 (M2)	LINC00534	-3.43302	0.035	0.113	1.98842e-07	0.00709726
Macrophages 2 (M2)	GABBR2	-3.44044	0.023	0.103	4.54806e-07	0.0162334
Macrophages 2 (M2)	LINC00907	-3.51803	0.033	0.127	1.68445e-08	0.000601233
Macrophages 2 (M2)	MIR3681HG	-3.52962	0.04	0.165	4.90487e-13	1.75069e-08
Macrophages 2 (M2)	OPCML	-3.53068	0.036	0.175	4.67348e-13	1.66811e-08
Macrophages 2 (M2)	PLIN2	-3.532	0.057	0.271	7.31573e-21	2.6112e-16
Macrophages 2 (M2)	LUCAT1	-3.53262	0.038	0.203	4.8592e-15	1.7344e-10
Macrophages 2 (M2)	OBI1-AS1	-3.53293	0.019	0.113	1.28519e-08	0.000458721
Macrophages 2 (M2)	EDARADD	-3.59361	0.024	0.113	3.92321e-08	0.00140031
Macrophages 2 (M2)	LINC02006	-3.61713	0.021	0.103	1.97822e-07	0.00706088
Macrophages 2 (M2)	CNTNAP5	-3.6192	0.031	0.148	3.2323e-11	1.15371e-06
Macrophages 2 (M2)	LRP1B	-3.64615	0.071	0.296	8.99456e-25	3.21043e-20
Macrophages 2 (M2)	TMEM132D	-3.68706	0.04	0.175	8.74174e-14	3.12019e-09
Macrophages 2 (M2)	GLT1D1	-3.73457	0.019	0.103	2.63545e-08	0.000940672
Macrophages 2 (M2)	AL627171.2	-3.74373	0.045	0.199	1.60666e-15	5.73466e-11
Macrophages 2 (M2)	LINC00276	-3.84143	0.026	0.134	4.78562e-11	1.70813e-06
Macrophages 2 (M2)	RBFOX1	-3.87824	0.13	0.567	2.30205e-56	8.21671e-52
Macrophages 2 (M2)	CDH13	-3.89431	0.055	0.261	6.91232e-22	2.46721e-17
Macrophages 2 (M2)	CELSR1	-3.95678	0.029	0.107	2.48957e-09	8.88603e-05
Macrophages 2 (M2)	NWD1	-4.13218	0.012	0.113	2.20188e-10	7.85917e-06
Macrophages 2 (M2)	KCNMB2	-4.20618	0.019	0.113	3.62806e-10	1.29496e-05
Macrophages 2 (M2)	AL357507.1	-4.3991	0.016	0.113	6.32209e-10	2.25654e-05
Macrophages 2 (M2)	ANK1	-4.54263	0.017	0.11	2.35011e-10	8.38825e-06
Myoid cells	HIST1H2AA	7.55919	0.117	0.003	1.1767e-16	4.20001e-12
Myoid cells	PRND	5.03242	0.148	0.006	3.49472e-19	1.24737e-14
Myoid cells	DCDC2C	4.4425	0.324	0.014	1.02173e-44	3.64684e-40
Myoid cells	WFDC1	3.37103	0.203	0.014	5.65078e-24	2.01693e-19
Myoid cells	LCNL1	3.34363	0.21	0.017	8.66957e-24	3.09443e-19
Myoid cells	SPINK13	3.30616	0.22	0.012	9.03059e-29	3.22329e-24
Myoid cells	SEMA3C	3.23672	0.342	0.055	3.09983e-34	1.10642e-29
Myoid cells	MTRNR2L1	3.18043	0.134	0.009	6.37926e-16	2.27695e-11
Myoid cells	ANKRD30B	3.15891	0.11	0.017	6.03819e-10	2.15521e-05
Myoid cells	SPATA22	3.15662	0.125	0.02	3.04373e-11	1.0864e-06
Myoid cells	NDUFA5	3.143	0.118	0.006	1.79656e-15	6.41248e-11
Myoid cells	TRDMT1	3.12143	0.105	0.009	1.11179e-11	3.9683e-07
Myoid cells	HMGB4	3.10061	0.133	0.029	1.67173e-11	5.96692e-07
Myoid cells	TNP1	3.06861	0.241	0.078	1.09229e-20	3.8987e-16
Myoid cells	TMSB10	3.06485	0.262	0.041	1.22827e-24	4.38408e-20
Myoid cells	SLC35A1	2.98244	0.115	0.023	3.10852e-09	0.000110952
Myoid cells	PTGDS	2.97468	0.918	0.275	2.43502e-165	8.69132e-161
Myoid cells	RPS21	2.96756	0.148	0.023	5.63579e-13	2.01158e-08
Myoid cells	RPS14	2.95914	0.174	0.032	2.03746e-14	7.27231e-10
Myoid cells	COX7A2	2.92578	0.115	0.017	2.91443e-10	1.04025e-05
Myoid cells	RPL29	2.91633	0.136	0.026	7.88954e-11	2.81601e-06
Myoid cells	ATP5IF1	2.88698	0.106	0.017	1.24103e-09	4.42962e-05
Myoid cells	PTCH1	2.87912	0.723	0.191	4.8876e-89	1.74453e-84
Myoid cells	ANKRD7	2.87084	0.271	0.049	8.21082e-24	2.93069e-19
Myoid cells	AC053527.2	2.8082	0.156	0.029	1.10875e-12	3.95746e-08
Myoid cells	EEF1G	2.71597	0.111	0.026	4.94306e-08	0.00176433
Myoid cells	KLF8	2.71542	0.129	0.023	1.53663e-10	5.48469e-06
Myoid cells	TUBB4B	2.70568	0.129	0.023	1.75093e-10	6.24959e-06
Myoid cells	LINC01206	2.70021	0.111	0.017	5.88896e-10	2.10195e-05
Myoid cells	RAB40A	2.69267	0.142	0.026	2.00168e-11	7.14458e-07
Myoid cells	NT5DC2	2.67021	0.123	0.026	3.9496e-09	0.000140973
Myoid cells	RPS11	2.66683	0.177	0.032	5.40622e-15	1.92964e-10
Myoid cells	RPL15	2.66097	0.208	0.032	9.50569e-19	3.39287e-14
Myoid cells	AC105402.3	2.6562	0.164	0.014	3.79323e-18	1.35392e-13
Myoid cells	RPSA	2.64329	0.131	0.023	1.19509e-10	4.26564e-06
Myoid cells	PAK3	2.62604	0.632	0.165	1.70079e-64	6.07062e-60
Myoid cells	MARCKSL1	2.61798	0.135	0.017	6.69569e-13	2.38989e-08
Myoid cells	PRM1	2.60796	0.27	0.162	1.28073e-37	4.57132e-33
Myoid cells	TUBA1B	2.6073	0.119	0.02	5.86316e-10	2.09274e-05
Myoid cells	RPL23A	2.60272	0.101	0.023	2.24329e-07	0.00800699
Myoid cells	AC021231.1	2.58387	0.138	0.012	1.42742e-15	5.09489e-11
Myoid cells	DHCR24	2.56494	0.101	0.017	1.99802e-08	0.000713152
Myoid cells	TSACC	2.55098	0.101	0.023	1.18592e-07	0.00423289
Myoid cells	RPL41	2.53101	0.289	0.067	2.97978e-22	1.06357e-17
Myoid cells	RPS18	2.52236	0.202	0.032	5.66889e-18	2.0234e-13
Myoid cells	RPS27A	2.50755	0.161	0.032	1.71802e-12	6.13214e-08
Myoid cells	PEMT	2.48415	0.302	0.043	5.81447e-30	2.07536e-25
Myoid cells	RNASE1	2.47539	0.254	0.035	9.63373e-25	3.43857e-20
Myoid cells	RPLP1	2.46436	0.324	0.078	4.92366e-24	1.7574e-19
Myoid cells	SEMA3D	2.4513	0.439	0.072	3.19499e-45	1.14039e-40
Myoid cells	CPEB2	2.44488	0.233	0.043	2.90488e-19	1.03684e-14
Myoid cells	PRPS2	2.43027	0.666	0.171	1.2208e-69	4.35742e-65
Myoid cells	SYCP1	2.39986	0.125	0.026	2.55182e-09	9.10822e-05
Myoid cells	INTS6L	2.39031	0.134	0.023	4.08654e-11	1.45861e-06
Myoid cells	MIR202HG	2.35905	0.24	0.052	2.72503e-18	9.72644e-14
Myoid cells	AASS	2.34825	0.438	0.11	8.78056e-36	3.13404e-31
Myoid cells	INSYN2A	2.33218	0.265	0.032	1.15384e-28	4.1184e-24
Myoid cells	RPL3	2.32868	0.226	0.058	3.28667e-15	1.17311e-10
Myoid cells	AC124852.1	2.32861	0.391	0.096	1.64211e-30	5.86119e-26
Myoid cells	RPL39	2.32617	0.129	0.023	1.69405e-10	6.04657e-06
Myoid cells	PDZRN4	2.30098	0.912	0.441	1.67854e-116	5.99122e-112
Myoid cells	CD164	2.29756	0.187	0.043	2.98049e-13	1.06383e-08
Myoid cells	TIMP1	2.28753	0.274	0.049	1.20337e-23	4.29519e-19
Myoid cells	COL1A1	2.27548	0.289	0.058	1.36021e-23	4.85501e-19
Myoid cells	CST3	2.26183	0.285	0.075	2.89372e-19	1.03286e-14
Myoid cells	SPPL2B	2.25372	0.127	0.02	5.99537e-11	2.13993e-06
Myoid cells	TMEM59	2.23443	0.159	0.038	9.2498e-11	3.30153e-06
Myoid cells	DPEP1	2.23233	0.281	0.046	8.30625e-26	2.96475e-21
Myoid cells	PTCH2	2.22648	0.507	0.113	5.06741e-47	1.80871e-42
Myoid cells	CALM3	2.2134	0.123	0.02	1.51076e-10	5.39236e-06
Myoid cells	CLDND1	2.19562	0.114	0.032	6.24796e-07	0.0223008
Myoid cells	SERF2	2.19086	0.147	0.035	3.75091e-10	1.33881e-05
Myoid cells	ITGA6	2.17755	0.142	0.017	4.56857e-14	1.63066e-09
Myoid cells	AC020637.1	2.17231	0.452	0.096	1.17148e-40	4.18137e-36
Myoid cells	AL109829.1	2.1693	0.726	0.27	9.67075e-64	3.45178e-59
Myoid cells	AFF2	2.16809	0.438	0.093	4.78409e-39	1.70759e-34
Myoid cells	RPS3	2.14658	0.163	0.029	2.25907e-13	8.06329e-09
Myoid cells	USP13	2.14548	0.204	0.055	5.92038e-13	2.11316e-08
Myoid cells	TGFBR1	2.14525	0.169	0.041	2.11651e-11	7.55444e-07
Myoid cells	RPS15	2.13842	0.124	0.035	2.07851e-07	0.00741882
Myoid cells	DTWD2	2.13655	0.116	0.017	1.85406e-10	6.6177e-06
Myoid cells	IFI44L	2.13611	0.146	0.038	2.57009e-09	9.17341e-05
Myoid cells	VRK1	2.1261	0.146	0.023	1.24284e-12	4.43607e-08
Myoid cells	APOA1	2.12013	0.237	0.055	6.17446e-17	2.20385e-12
Myoid cells	OBSL1	2.10889	0.142	0.046	1.1877e-07	0.00423927
Myoid cells	FBXW5	2.1083	0.12	0.026	9.48165e-09	0.000338429
Myoid cells	MAP3K1	2.10119	0.143	0.032	4.549e-10	1.62367e-05
Myoid cells	FANCL	2.09994	0.234	0.058	7.56975e-16	2.70187e-11
Myoid cells	RAB14	2.09619	0.147	0.041	7.57394e-09	0.000270336
Myoid cells	NHLRC3	2.09013	0.134	0.029	8.66358e-10	3.09229e-05
Myoid cells	GPX4	2.08998	0.157	0.035	3.74063e-11	1.33514e-06
Myoid cells	ATP6V0C	2.07426	0.117	0.026	3.26481e-08	0.00116531
Myoid cells	SRPX	2.07417	0.151	0.029	8.32578e-12	2.97172e-07
Myoid cells	IL16	2.07189	0.276	0.055	2.22425e-22	7.93902e-18
Myoid cells	MEOX2	2.06925	0.147	0.041	6.8739e-09	0.00024535
Myoid cells	CMTM6	2.06751	0.125	0.026	3.20876e-09	0.00011453
Myoid cells	ORC5	2.06731	0.197	0.043	2.61802e-14	9.3445e-10
Myoid cells	DEFB119	2.06439	0.14	0.02	4.34356e-13	1.55035e-08
Myoid cells	ERGIC3	2.05791	0.114	0.029	2.4367e-07	0.00869731
Myoid cells	NUTM2A-AS1	2.05751	0.309	0.055	2.01982e-27	7.20935e-23
Myoid cells	ACP1	2.04773	0.109	0.026	2.3384e-07	0.00834645
Myoid cells	PWWP3A	2.0366	0.215	0.061	5.46984e-13	1.95235e-08
Myoid cells	RPL37A	2.03188	0.412	0.107	5.70331e-31	2.03568e-26
Myoid cells	UBB	2.02476	0.179	0.046	2.25326e-11	8.04255e-07
Myoid cells	ORMDL1	2.02203	0.142	0.035	2.59105e-09	9.24825e-05
Myoid cells	MSMO1	2.01584	0.162	0.032	1.06941e-12	3.81705e-08
Myoid cells	PPA1	2.01124	0.148	0.041	4.62266e-09	0.000164997
Myoid cells	SLC2A3	-2.00409	0.096	0.212	3.81248e-15	1.36079e-10
Myoid cells	DCC	-2.01057	0.091	0.151	1.96794e-13	7.02416e-09
Myoid cells	DNAH9	-2.03089	0.062	0.104	6.53848e-09	0.000233378
Myoid cells	AC006148.1	-2.03838	0.054	0.107	4.15116e-07	0.0148167
Myoid cells	AC002460.2	-2.05189	0.063	0.133	1.79514e-09	6.4074e-05
Myoid cells	GPRASP1	-2.06417	0.048	0.125	5.39298e-08	0.00192492
Myoid cells	ITPKC	-2.06903	0.063	0.157	5.46418e-11	1.95033e-06
Myoid cells	PXDNL	-2.07574	0.071	0.116	8.9456e-10	3.19295e-05
Myoid cells	LINC01505	-2.09342	0.099	0.243	3.41423e-16	1.21864e-11
Myoid cells	LINC00486	-2.09615	0.315	0.458	1.79247e-46	6.39787e-42
Myoid cells	FOS	-2.09661	0.058	0.11	1.52399e-07	0.00543957
Myoid cells	EYS	-2.11506	0.154	0.284	2.47641e-24	8.83906e-20
Myoid cells	ZFP36	-2.12567	0.1	0.226	4.71646e-18	1.68345e-13
Myoid cells	TMEM192	-2.12962	0.075	0.142	6.36592e-10	2.27219e-05
Myoid cells	RYR3	-2.13094	0.063	0.104	2.55945e-09	9.13544e-05
Myoid cells	HSPB1	-2.139	0.076	0.194	9.76837e-14	3.48662e-09
Myoid cells	PTPRD	-2.13902	0.178	0.319	3.20606e-27	1.14434e-22
Myoid cells	TTF2	-2.14028	0.067	0.148	1.35945e-09	4.85229e-05
Myoid cells	ARID3A	-2.14973	0.041	0.11	5.14875e-07	0.0183774
Myoid cells	AC011447.3	-2.1524	0.058	0.101	9.38145e-09	0.000334852
Myoid cells	AC009975.1	-2.18155	0.059	0.145	2.51672e-10	8.98292e-06
Myoid cells	CDH3	-2.22154	0.084	0.151	1.36723e-13	4.88006e-09
Myoid cells	CDKN1A	-2.24548	0.064	0.177	3.58098e-14	1.27816e-09
Myoid cells	DAPK2	-2.26037	0.049	0.139	2.88981e-10	1.03146e-05
Myoid cells	GRM7	-2.26214	0.074	0.133	1.55335e-16	5.54438e-12
Myoid cells	EGLN3	-2.26273	0.093	0.157	4.73429e-17	1.68981e-12
Myoid cells	SLC43A2	-2.28134	0.062	0.154	7.01905e-11	2.50531e-06
Myoid cells	AC113414.1	-2.28602	0.113	0.171	3.49028e-25	1.24578e-20
Myoid cells	C8orf37-AS1	-2.28973	0.06	0.107	1.34552e-08	0.000480258
Myoid cells	AC034114.2	-2.29589	0.055	0.128	2.05769e-10	7.3445e-06
Myoid cells	DNAH3	-2.30333	0.061	0.116	9.13448e-10	3.26037e-05
Myoid cells	RAP1GAP2	-2.30837	0.082	0.113	3.18562e-14	1.13704e-09
Myoid cells	SOD2	-2.31269	0.151	0.284	1.13166e-27	4.03924e-23
Myoid cells	SORBS2	-2.31966	0.048	0.104	4.85684e-08	0.00173355
Myoid cells	Z95118.2	-2.32084	0.036	0.113	2.23529e-08	0.000797844
Myoid cells	JUN	-2.3232	0.058	0.107	3.16075e-10	1.12817e-05
Myoid cells	PCAT1	-2.32351	0.071	0.128	3.02326e-14	1.07909e-09
Myoid cells	AC007402.1	-2.35609	0.089	0.194	1.43782e-17	5.132e-13
Myoid cells	SEMA3A	-2.38087	0.057	0.11	4.95127e-11	1.76726e-06
Myoid cells	ALDH1L1	-2.3847	0.166	0.322	6.64774e-31	2.37278e-26
Myoid cells	CDH12	-2.39047	0.074	0.159	6.01289e-15	2.14618e-10
Myoid cells	PTPRT	-2.39795	0.077	0.157	3.87829e-16	1.38428e-11
Myoid cells	DSCAM	-2.39835	0.068	0.122	3.95175e-14	1.4105e-09
Myoid cells	FSTL5	-2.40533	0.059	0.145	1.41208e-10	5.04013e-06
Myoid cells	PCDH15	-2.42523	0.094	0.203	5.8642e-17	2.09311e-12
Myoid cells	LINC02240	-2.43299	0.056	0.128	1.16366e-12	4.15343e-08
Myoid cells	SDK2	-2.44882	0.059	0.104	1.16223e-12	4.14834e-08
Myoid cells	HIST1H2AC	-2.46242	0.047	0.122	2.10731e-10	7.52162e-06
Myoid cells	LRP1B	-2.49142	0.104	0.229	6.2661e-23	2.23656e-18
Myoid cells	AL157944.1	-2.49764	0.039	0.101	1.8378e-08	0.000655966
Myoid cells	TXNRD1	-2.49874	0.292	0.478	2.4068e-66	8.59058e-62
Myoid cells	USH2A	-2.50005	0.051	0.11	8.05597e-10	2.87542e-05
Myoid cells	AL078604.4	-2.50161	0.048	0.142	3.09977e-12	1.1064e-07
Myoid cells	TAFA1	-2.5115	0.035	0.104	2.82385e-08	0.00100792
Myoid cells	CLIP2	-2.52099	0.075	0.139	2.97795e-17	1.06292e-12
Myoid cells	SHANK2	-2.52437	0.057	0.122	4.13969e-10	1.47758e-05
Myoid cells	LINC00511	-2.52588	0.063	0.11	2.79364e-13	9.97134e-09
Myoid cells	CNTN5	-2.55247	0.097	0.2	2.02956e-21	7.2441e-17
Myoid cells	THSD7B	-2.56256	0.065	0.159	8.08421e-16	2.8855e-11
Myoid cells	AC100793.2	-2.56612	0.019	0.104	1.42611e-11	5.09022e-07
Myoid cells	ANKFN1	-2.58994	0.058	0.136	4.7372e-13	1.69085e-08
Myoid cells	CREB5	-2.65219	0.047	0.101	3.85232e-11	1.37501e-06
Myoid cells	NELL1	-2.6705	0.057	0.142	4.54425e-15	1.62198e-10
Myoid cells	DNAH11	-2.69364	0.045	0.107	4.41373e-10	1.57539e-05
Myoid cells	PLCG2	-2.70752	0.209	0.501	5.6947e-74	2.03261e-69
Myoid cells	RELN	-2.71702	0.046	0.113	5.61334e-11	2.00357e-06
Myoid cells	DGKB	-2.71967	0.046	0.119	3.35261e-13	1.19665e-08
Myoid cells	ID2	-2.72036	0.034	0.116	1.434e-10	5.11839e-06
Myoid cells	RALYL	-2.7221	0.042	0.113	9.62159e-13	3.43423e-08
Myoid cells	ARHGAP15	-2.73348	0.04	0.11	4.11082e-09	0.000146728
Myoid cells	KSR2	-2.73618	0.037	0.11	7.63396e-11	2.72479e-06
Myoid cells	UGDH	-2.76387	0.047	0.11	4.9573e-13	1.76941e-08
Myoid cells	SERPINE1	-2.78171	0.105	0.165	1.08696e-13	3.87969e-09
Myoid cells	FTL	-2.80393	0.092	0.31	1.40292e-32	5.00743e-28
Myoid cells	PLIN5	-2.80856	0.027	0.107	3.46286e-11	1.236e-06
Myoid cells	LINC01320	-2.81164	0.078	0.203	4.74098e-24	1.6922e-19
Myoid cells	KIF26B	-2.81506	0.07	0.168	4.42e-20	1.57763e-15
Myoid cells	AL627171.2	-2.83617	0.065	0.139	3.31325e-16	1.1826e-11
Myoid cells	FRMD4A	-2.83746	0.089	0.272	5.55658e-30	1.98331e-25
Myoid cells	CHST15	-2.84057	0.033	0.13	1.68144e-13	6.00155e-09
Myoid cells	AL391117.1	-2.85716	0.043	0.116	1.80023e-14	6.42556e-10
Myoid cells	ASIC2	-2.86931	0.04	0.107	1.50463e-12	5.37047e-08
Myoid cells	NTM	-2.87928	0.047	0.125	6.33574e-14	2.26141e-09
Myoid cells	MIR3681HG	-2.95618	0.04	0.113	1.8402e-13	6.56824e-09
Myoid cells	NKAIN3	-2.96753	0.046	0.11	1.22216e-14	4.36224e-10
Myoid cells	HSPA1A	-3.02343	0.026	0.136	1.19882e-15	4.27896e-11
Myoid cells	LINC01322	-3.03365	0.039	0.122	8.06525e-14	2.87873e-09
Myoid cells	CNTNAP2	-3.04713	0.132	0.345	3.02044e-47	1.07809e-42
Myoid cells	RASGEF1B	-3.05027	0.055	0.157	3.11016e-17	1.11011e-12
Myoid cells	AC034268.2	-3.07281	0.059	0.203	5.36865e-23	1.91623e-18
Myoid cells	CDH13	-3.12727	0.063	0.209	3.39375e-25	1.21133e-20
Myoid cells	CCDC26	-3.13055	0.041	0.125	6.74287e-15	2.40673e-10
Myoid cells	ALK	-3.17735	0.036	0.101	3.02838e-11	1.08092e-06
Myoid cells	AL356295.1	-3.19559	0.025	0.107	4.06234e-13	1.44997e-08
Myoid cells	CACNA1A	-3.2098	0.084	0.214	1.76994e-28	6.31746e-24
Myoid cells	DNAJB1	-3.21288	0.049	0.18	1.5728e-19	5.61378e-15
Myoid cells	UNC5D	-3.2271	0.032	0.11	3.78716e-14	1.35175e-09
Myoid cells	RBFOX1	-3.26751	0.168	0.426	4.74625e-68	1.69408e-63
Myoid cells	CNTNAP5	-3.34901	0.036	0.128	1.56741e-14	5.59455e-10
Myoid cells	EID3	-3.40233	0.038	0.194	2.29075e-23	8.17638e-19
Myoid cells	LRRC4C	-3.42114	0.063	0.217	1.48878e-28	5.31392e-24
Myoid cells	SNTG1	-3.44006	0.039	0.157	3.06326e-19	1.09337e-14
Myoid cells	SLC4A4	-3.47966	0.024	0.104	1.13087e-13	4.03643e-09
Myoid cells	AGBL1	-3.48419	0.035	0.142	2.14061e-19	7.64048e-15
Myoid cells	HSPA1B	-3.51145	0.03	0.194	6.69605e-27	2.39002e-22
Myoid cells	CUX2	-3.67545	0.034	0.122	3.50782e-17	1.25204e-12
Myoid cells	TMEM132D	-3.72385	0.041	0.148	6.27038e-22	2.23809e-17
Myoid cells	PLIN2	-3.73262	0.08	0.307	5.76518e-49	2.05777e-44
Myoid cells	RELB	-3.83221	0.027	0.133	8.21432e-19	2.93194e-14
Myoid cells	PPP1R15A	-4.08499	0.021	0.142	1.55603e-20	5.55393e-16
Myoid cells	LUCAT1	-4.59957	0.02	0.18	1.72066e-32	6.14155e-28
Peritubular cells	HIST1H2AA	6.81554	0.156	0.002	9.95873e-35	3.55457e-30
Peritubular cells	RBAKDN	6.69893	0.121	0.002	2.62718e-26	9.3772e-22
Peritubular cells	DHCR7	5.00667	0.138	0.007	3.42266e-26	1.22165e-21
Peritubular cells	C5orf58	4.46598	0.105	0.005	1.20721e-19	4.30888e-15
Peritubular cells	GSTA1	4.12454	0.538	0.034	1.8435e-126	6.58001e-122
Peritubular cells	CD81	3.87124	0.112	0.007	4.6816e-20	1.671e-15
Peritubular cells	EMB	3.42302	0.408	0.048	6.42259e-73	2.29241e-68
Peritubular cells	ACAT2	3.40987	0.204	0.016	6.52295e-36	2.32824e-31
Peritubular cells	RAB40A	3.38578	0.155	0.009	1.886e-29	6.73169e-25
Peritubular cells	MVD	3.38377	0.253	0.018	4.33242e-47	1.54637e-42
Peritubular cells	LHCGR	3.37225	0.533	0.061	1.05558e-106	3.76768e-102
Peritubular cells	CATSPERZ	3.34754	0.114	0.009	1.4533e-19	5.18726e-15
Peritubular cells	EBP	3.33675	0.13	0.011	7.73599e-22	2.76121e-17
Peritubular cells	MSMO1	3.31751	0.379	0.066	7.15404e-57	2.55349e-52
Peritubular cells	CYP51A1	3.28306	0.381	0.047	2.09294e-65	7.47034e-61
Peritubular cells	AC105402.3	3.27568	0.182	0.02	1.00784e-28	3.59728e-24
Peritubular cells	INSL3	3.19571	0.155	0.009	1.5764e-29	5.62666e-25
Peritubular cells	ALKBH7	3.18828	0.102	0.011	7.1991e-16	2.56958e-11
Peritubular cells	PDK4	3.17055	0.6	0.12	8.22895e-105	2.93716e-100
Peritubular cells	GREB1	3.11798	0.598	0.116	4.96445e-103	1.77196e-98
Peritubular cells	GPAM	3.11743	0.125	0.011	6.44746e-21	2.30129e-16
Peritubular cells	ACE2	3.10959	0.246	0.023	5.80427e-42	2.07172e-37
Peritubular cells	STARD4	3.08015	0.163	0.018	1.96554e-25	7.0156e-21
Peritubular cells	MIR503HG	3.06914	0.182	0.018	9.05733e-30	3.23283e-25
Peritubular cells	SRP14	3.06187	0.129	0.018	5.00496e-18	1.78642e-13
Peritubular cells	H2AFJ	3.05957	0.188	0.027	1.26025e-26	4.4982e-22
Peritubular cells	RBP1	3.04203	0.207	0.013	6.07705e-40	2.16908e-35
Peritubular cells	GATA6	3.04172	0.139	0.016	4.97878e-21	1.77708e-16
Peritubular cells	PSMC2	3.02856	0.102	0.013	8.29225e-15	2.95975e-10
Peritubular cells	AC024084.1	2.96434	0.203	0.02	1.00219e-33	3.57711e-29
Peritubular cells	SH3BP5	2.95054	0.428	0.063	8.53981e-71	3.04811e-66
Peritubular cells	ACSM3	2.91914	0.833	0.274	4.3021e-154	1.53555e-149
Peritubular cells	PHYHIP	2.91755	0.135	0.009	8.69501e-25	3.10351e-20
Peritubular cells	TUBB4A	2.89912	0.128	0.009	3.37437e-23	1.20441e-18
Peritubular cells	FAU	2.88527	0.104	0.011	1.46763e-16	5.23842e-12
Peritubular cells	COL3A1	2.8802	0.402	0.061	5.51037e-64	1.96682e-59
Peritubular cells	IDI1	2.85807	0.2	0.023	4.56472e-31	1.62929e-26
Peritubular cells	HSD17B6	2.7731	0.237	0.03	3.53197e-36	1.26067e-31
Peritubular cells	OBSL1	2.76732	0.213	0.023	2.16091e-34	7.71294e-30
Peritubular cells	RPS23	2.75743	0.144	0.02	2.5934e-20	9.25662e-16
Peritubular cells	SERPINA5	2.75668	0.205	0.029	1.58743e-29	5.66602e-25
Peritubular cells	PROK1	2.70232	0.103	0.011	2.77192e-16	9.89383e-12
Peritubular cells	CALB2	2.7004	0.301	0.027	1.19648e-55	4.27059e-51
Peritubular cells	ANKDD1A	2.69577	0.455	0.086	9.51706e-68	3.39693e-63
Peritubular cells	TMSB10	2.69483	0.276	0.034	2.28663e-44	8.16168e-40
Peritubular cells	MAOB	2.68818	0.147	0.025	1.27598e-18	4.55435e-14
Peritubular cells	TNP1	2.68287	0.34	0.089	2.72174e-39	9.71471e-35
Peritubular cells	VWA5B2	2.64058	0.11	0.016	8.74193e-15	3.12026e-10
Peritubular cells	ATP5IF1	2.63462	0.122	0.02	7.55199e-16	2.69553e-11
Peritubular cells	RNASE1	2.61796	0.256	0.03	1.6609e-41	5.92826e-37
Peritubular cells	RPS18	2.607	0.207	0.029	4.75676e-30	1.69783e-25
Peritubular cells	HMGCS1	2.59136	0.428	0.107	2.38416e-52	8.50977e-48
Peritubular cells	CMTR2	2.58398	0.109	0.013	2.20442e-16	7.86824e-12
Peritubular cells	SLC16A9	2.56578	0.461	0.077	2.83112e-73	1.01051e-68
Peritubular cells	PRPS2	2.53026	0.833	0.258	1.69923e-163	6.06506e-159
Peritubular cells	KLHL4	2.51339	0.445	0.088	1.26184e-63	4.5039e-59
Peritubular cells	CST3	2.51108	0.292	0.038	1.62437e-46	5.79785e-42
Peritubular cells	ACSM1	2.5083	0.209	0.021	3.04824e-35	1.08801e-30
Peritubular cells	RPL18	2.50042	0.143	0.023	1.4088e-18	5.02843e-14
Peritubular cells	FHL2	2.49904	0.594	0.141	3.39628e-89	1.21223e-84
Peritubular cells	SPATA22	2.48156	0.177	0.02	1.3331e-28	4.75824e-24
Peritubular cells	MIR22HG	2.47679	0.131	0.014	3.12265e-21	1.11457e-16
Peritubular cells	AURKAIP1	2.47489	0.102	0.018	1.83529e-12	6.55069e-08
Peritubular cells	BBIP1	2.47151	0.139	0.02	9.85906e-20	3.519e-15
Peritubular cells	COX6C	2.4652	0.165	0.029	9.00051e-21	3.21255e-16
Peritubular cells	GUF1	2.46437	0.12	0.016	1.96561e-17	7.01585e-13
Peritubular cells	MIR202HG	2.45023	0.37	0.072	5.27909e-50	1.88427e-45
Peritubular cells	RPL23	2.44714	0.133	0.023	1.60152e-16	5.71629e-12
Peritubular cells	RANBP3L	2.43269	0.104	0.011	9.57704e-17	3.41833e-12
Peritubular cells	HINT1	2.4307	0.113	0.027	1.72744e-11	6.16574e-07
Peritubular cells	MVK	2.43004	0.115	0.009	4.571e-21	1.63153e-16
Peritubular cells	RPL15	2.41357	0.194	0.03	1.17816e-26	4.20521e-22
Peritubular cells	COX7A2	2.36632	0.159	0.032	4.09556e-18	1.46183e-13
Peritubular cells	GSTA4	2.35442	0.485	0.113	1.45619e-65	5.19756e-61
Peritubular cells	COX7C	2.35153	0.104	0.013	4.73621e-16	1.69049e-11
Peritubular cells	AL109829.1	2.35131	0.383	0.052	1.81367e-63	6.47352e-59
Peritubular cells	FASN	2.34992	0.169	0.021	1.68704e-25	6.02155e-21
Peritubular cells	LINC01206	2.34919	0.143	0.018	4.79548e-22	1.71165e-17
Peritubular cells	AFF2	2.32603	0.553	0.109	9.1688e-88	3.27262e-83
Peritubular cells	IGFBP5	2.32304	0.158	0.021	2.48224e-23	8.85988e-19
Peritubular cells	MEG8	2.31949	0.532	0.229	5.10904e-47	1.82357e-42
Peritubular cells	AC109472.1	2.31717	0.504	0.1	9.96095e-76	3.55536e-71
Peritubular cells	F3	2.30976	0.354	0.055	1.15571e-53	4.12509e-49
Peritubular cells	ABO	2.28694	0.384	0.063	5.21972e-58	1.86308e-53
Peritubular cells	IDH1	2.28575	0.183	0.023	6.69244e-28	2.38873e-23
Peritubular cells	PRM1	2.27213	0.377	0.19	4.0552e-44	1.44742e-39
Peritubular cells	RPL29	2.26965	0.14	0.03	3.29555e-15	1.17628e-10
Peritubular cells	TMSB4X	2.25731	0.115	0.02	1.813e-14	6.47114e-10
Peritubular cells	MCF2	2.25339	0.104	0.016	5.70435e-14	2.03605e-09
Peritubular cells	ACCS	2.2458	0.109	0.013	6.91863e-17	2.46946e-12
Peritubular cells	SUSD4	2.24473	0.249	0.034	3.12012e-38	1.11367e-33
Peritubular cells	PRND	2.23632	0.153	0.02	2.46643e-23	8.80344e-19
Peritubular cells	TUBB4B	2.23009	0.16	0.021	3.97883e-24	1.42016e-19
Peritubular cells	LMO3	2.22371	0.154	0.016	7.05062e-26	2.51658e-21
Peritubular cells	MRPL42	2.20911	0.122	0.011	1.47074e-21	5.2495e-17
Peritubular cells	PDZRN4	2.20408	0.733	0.218	3.33656e-112	1.19092e-107
Peritubular cells	MIRLET7BHG	2.19693	0.425	0.097	2.08552e-54	7.44383e-50
Peritubular cells	CARNMT1	2.19455	0.168	0.03	5.59364e-21	1.99654e-16
Peritubular cells	AMMECR1	2.19443	0.466	0.118	1.38913e-57	4.95824e-53
Peritubular cells	PNPLA3	2.18865	0.209	0.038	1.76326e-26	6.29361e-22
Peritubular cells	MED6	2.1845	0.105	0.021	9.97836e-12	3.56158e-07
Peritubular cells	STMN1	2.15851	0.147	0.014	6.732e-25	2.40285e-20
Peritubular cells	RPLP1	2.15232	0.33	0.063	1.20929e-44	4.31631e-40
Peritubular cells	NSG1	2.15143	0.246	0.043	4.67172e-33	1.66748e-28
Peritubular cells	PIK3R1	2.14984	0.568	0.15	2.44582e-75	8.72987e-71
Peritubular cells	FDX1	2.14578	0.309	0.084	1.97526e-31	7.05029e-27
Peritubular cells	RPLP2	2.14137	0.21	0.048	1.40183e-22	5.00356e-18
Peritubular cells	TSACC	2.14102	0.137	0.02	1.14425e-19	4.08416e-15
Peritubular cells	SCML1	2.14091	0.469	0.093	3.68822e-68	1.31644e-63
Peritubular cells	HMGCR	2.13663	0.31	0.084	8.12599e-32	2.90041e-27
Peritubular cells	TTC8	2.12751	0.432	0.097	4.48725e-56	1.60163e-51
Peritubular cells	RPS16	2.12428	0.138	0.023	7.38346e-18	2.63538e-13
Peritubular cells	ERBB4	2.11024	0.968	0.483	1.95357e-228	6.97286e-224
Peritubular cells	HMGB4	2.10588	0.181	0.03	6.25659e-24	2.23316e-19
Peritubular cells	AL445259.1	2.10117	0.118	0.018	2.66059e-16	9.49646e-12
Peritubular cells	AC005237.1	2.10026	0.17	0.027	2.37117e-23	8.46343e-19
Peritubular cells	ATP1B1	2.08896	0.126	0.02	2.25455e-17	8.04716e-13
Peritubular cells	CYP11A1	2.08742	0.511	0.154	2.49924e-57	8.92053e-53
Peritubular cells	CA8	2.07156	0.261	0.041	2.97838e-38	1.06307e-33
Peritubular cells	CLEC2D	2.07145	0.13	0.016	2.77816e-20	9.91607e-16
Peritubular cells	ACSS2	2.06994	0.39	0.132	3.16972e-35	1.13137e-30
Peritubular cells	LINC00278	2.06809	0.312	0.068	9.87928e-38	3.52621e-33
Peritubular cells	BRCC3	2.06505	0.136	0.032	8.93314e-14	3.18851e-09
Peritubular cells	PFDN5	2.05672	0.146	0.038	8.09172e-14	2.88818e-09
Peritubular cells	MIF	2.04483	0.106	0.016	3.98718e-15	1.42315e-10
Peritubular cells	BROX	2.02736	0.11	0.023	3.28552e-12	1.1727e-07
Peritubular cells	GRID2	2.02422	0.802	0.295	6.13424e-120	2.1895e-115
Peritubular cells	SF1	2.0171	0.431	0.098	4.04983e-55	1.4455e-50
Peritubular cells	GPR173	2.01564	0.133	0.021	2.13754e-18	7.62953e-14
Peritubular cells	CTSA	2.0088	0.147	0.025	4.53481e-19	1.61861e-14
Peritubular cells	AACS	2.00609	0.246	0.047	2.51883e-31	8.99048e-27
Peritubular cells	RPS28	2.00562	0.189	0.034	2.71512e-24	9.69107e-20
Peritubular cells	PTPRD	-2.01003	0.196	0.342	6.04784e-37	2.15866e-32
Peritubular cells	CLIP2	-2.01294	0.12	0.152	2.42681e-20	8.662e-16
Peritubular cells	MIR4435-2HG	-2.01545	0.071	0.104	2.46148e-13	8.78574e-09
Peritubular cells	FTL	-2.01983	0.16	0.263	2.1459e-31	7.65937e-27
Peritubular cells	AL078604.4	-2.02413	0.09	0.147	8.57452e-15	3.0605e-10
Peritubular cells	BCL6	-2.02657	0.444	0.592	5.07451e-146	1.81125e-141
Peritubular cells	GRID1	-2.03014	0.082	0.148	8.30994e-16	2.96607e-11
Peritubular cells	LINC00871	-2.03427	0.068	0.109	1.81339e-14	6.47252e-10
Peritubular cells	C1RL-AS1	-2.03996	0.06	0.118	6.24326e-14	2.22841e-09
Peritubular cells	AC068587.4	-2.04297	0.078	0.116	1.02788e-13	3.66881e-09
Peritubular cells	ST6GAL1	-2.04922	0.065	0.125	3.7891e-13	1.35244e-08
Peritubular cells	SLC2A3	-2.05273	0.095	0.179	5.2634e-20	1.87867e-15
Peritubular cells	DOP1B	-2.06757	0.08	0.118	2.99377e-13	1.06857e-08
Peritubular cells	LINC01320	-2.09162	0.089	0.188	6.35285e-18	2.26752e-13
Peritubular cells	FBXO32	-2.09922	0.098	0.184	1.33833e-22	4.77691e-18
Peritubular cells	PLA2G4C	-2.12972	0.09	0.168	1.76167e-14	6.28793e-10
Peritubular cells	LINC00486	-2.1332	0.315	0.415	4.3586e-75	1.55572e-70
Peritubular cells	COL23A1	-2.13963	0.059	0.116	9.05299e-11	3.23129e-06
Peritubular cells	SHANK2	-2.14329	0.077	0.116	6.47708e-17	2.31186e-12
Peritubular cells	DISC1FP1	-2.14885	0.059	0.111	1.67085e-12	5.96377e-08
Peritubular cells	PDGFRA	-2.15272	0.083	0.152	5.01402e-16	1.78966e-11
Peritubular cells	RAP1GAP2	-2.16899	0.08	0.134	1.15752e-15	4.13153e-11
Peritubular cells	BANK1	-2.20414	0.06	0.106	2.19292e-13	7.82719e-09
Peritubular cells	LINC01505	-2.20574	0.144	0.311	4.09099e-44	1.4602e-39
Peritubular cells	AMPD3	-2.21624	0.043	0.113	7.68646e-11	2.74353e-06
Peritubular cells	MTRNR2L12	-2.2208	0.271	0.419	2.99099e-57	1.06757e-52
Peritubular cells	MYH11	-2.23971	0.072	0.138	2.63359e-12	9.40006e-08
Peritubular cells	LINC02240	-2.24409	0.069	0.125	1.32462e-18	4.72796e-14
Peritubular cells	AL391117.1	-2.24838	0.061	0.131	2.41704e-14	8.62713e-10
Peritubular cells	DCC	-2.25746	0.063	0.156	4.62424e-16	1.65053e-11
Peritubular cells	PLEKHA4	-2.27122	0.052	0.114	4.2398e-11	1.51331e-06
Peritubular cells	GNG7	-2.27431	0.074	0.113	2.0359e-18	7.26675e-14
Peritubular cells	UBC	-2.27499	0.314	0.515	1.05617e-89	3.76978e-85
Peritubular cells	OLFML2B	-2.27834	0.049	0.122	2.93368e-14	1.04712e-09
Peritubular cells	SYN3	-2.28416	0.074	0.129	2.70014e-17	9.63762e-13
Peritubular cells	SLC7A14-AS1	-2.30912	0.155	0.324	2.13642e-54	7.62552e-50
Peritubular cells	RELB	-2.31518	0.053	0.118	4.70365e-14	1.67887e-09
Peritubular cells	HSPB1	-2.32851	0.056	0.12	3.56619e-14	1.27288e-09
Peritubular cells	PLIN2	-2.33761	0.122	0.243	2.55326e-32	9.11336e-28
Peritubular cells	PITPNC1	-2.37019	0.134	0.254	3.93659e-37	1.40509e-32
Peritubular cells	AC007402.1	-2.38626	0.089	0.215	2.26982e-26	8.10166e-22
Peritubular cells	CHRM3	-2.39407	0.072	0.122	1.2255e-21	4.37417e-17
Peritubular cells	CMYA5	-2.40404	0.092	0.159	5.72696e-19	2.04412e-14
Peritubular cells	LINC00511	-2.4088	0.063	0.123	2.82008e-16	1.00657e-11
Peritubular cells	TENM4	-2.41579	0.071	0.165	7.66719e-22	2.73665e-17
Peritubular cells	NRG1	-2.42155	0.089	0.222	2.73102e-27	9.74784e-23
Peritubular cells	PXDNL	-2.44048	0.047	0.107	2.20741e-13	7.8789e-09
Peritubular cells	GPX3	-2.45136	0.14	0.286	2.92066e-46	1.04247e-41
Peritubular cells	APOLD1	-2.45587	0.048	0.145	2.63387e-16	9.40108e-12
Peritubular cells	AC034114.2	-2.46534	0.052	0.131	4.57025e-14	1.63126e-09
Peritubular cells	CYP1B1-AS1	-2.46646	0.053	0.131	7.74046e-20	2.7628e-15
Peritubular cells	FRMD4B	-2.48998	0.045	0.102	1.99407e-12	7.11742e-08
Peritubular cells	AL138720.1	-2.50244	0.055	0.118	2.79767e-17	9.98572e-13
Peritubular cells	FSTL5	-2.51434	0.062	0.15	9.50644e-20	3.39313e-15
Peritubular cells	DNAH9	-2.51538	0.065	0.131	1.77009e-19	6.31798e-15
Peritubular cells	BNIP3	-2.51905	0.077	0.199	1.79704e-29	6.41417e-25
Peritubular cells	LINC00862	-2.5244	0.047	0.109	3.64304e-14	1.30031e-09
Peritubular cells	ALK	-2.52636	0.059	0.109	1.26473e-15	4.51419e-11
Peritubular cells	PCDH15	-2.54411	0.091	0.243	3.38221e-34	1.20721e-29
Peritubular cells	KSR2	-2.57688	0.038	0.102	2.86981e-12	1.02432e-07
Peritubular cells	AC018742.1	-2.57694	0.112	0.299	1.55154e-47	5.53791e-43
Peritubular cells	DSCAM	-2.58329	0.076	0.15	6.18258e-23	2.20675e-18
Peritubular cells	MIR3681HG	-2.62164	0.04	0.111	3.11285e-15	1.11107e-10
Peritubular cells	SNTG1	-2.63439	0.043	0.125	2.89166e-16	1.03212e-11
Peritubular cells	AC008050.1	-2.63596	0.043	0.102	8.11482e-14	2.89642e-09
Peritubular cells	LINC01090	-2.64585	0.049	0.114	1.44763e-16	5.16704e-12
Peritubular cells	PIEZO2	-2.64647	0.035	0.102	8.17831e-12	2.91908e-07
Peritubular cells	KIF26B	-2.65203	0.069	0.165	7.70783e-22	2.75116e-17
Peritubular cells	AC009975.1	-2.66606	0.04	0.114	1.57124e-14	5.60822e-10
Peritubular cells	RASGEF1B	-2.69165	0.045	0.132	6.94892e-18	2.48028e-13
Peritubular cells	DAPK2	-2.6982	0.032	0.106	3.95673e-14	1.41228e-09
Peritubular cells	AC034268.2	-2.72666	0.061	0.163	2.78939e-22	9.95615e-18
Peritubular cells	HSPA1A	-2.7339	0.033	0.131	8.66651e-18	3.09334e-13
Peritubular cells	ASIC2	-2.74432	0.041	0.102	2.85758e-15	1.01996e-10
Peritubular cells	GRM7	-2.74659	0.055	0.141	1.63339e-20	5.83006e-16
Peritubular cells	PLCG2	-2.75972	0.208	0.42	1.25522e-83	4.48026e-79
Peritubular cells	PALM2-AKAP2	-2.81173	0.06	0.147	2.0033e-24	7.15037e-20
Peritubular cells	CACNA1A	-2.83865	0.078	0.188	1.64296e-30	5.86421e-26
Peritubular cells	HSPA1B	-2.85866	0.051	0.168	2.67614e-26	9.55194e-22
Peritubular cells	AC120193.1	-2.9149	0.036	0.114	1.33974e-16	4.78193e-12
Peritubular cells	LINC00276	-2.9786	0.034	0.106	3.67075e-15	1.3102e-10
Peritubular cells	SPRY4-AS1	-3.01094	0.046	0.12	1.87536e-20	6.69372e-16
Peritubular cells	AL589693.1	-3.0133	0.03	0.118	9.64224e-18	3.44161e-13
Peritubular cells	CNTN5	-3.03239	0.055	0.184	1.14943e-29	4.10265e-25
Peritubular cells	EID3	-3.05617	0.177	0.451	1.33053e-101	4.74907e-97
Peritubular cells	UGDH	-3.0664	0.106	0.292	1.24954e-52	4.45999e-48
Peritubular cells	AC092100.1	-3.10863	0.037	0.109	1.68924e-17	6.02941e-13
Peritubular cells	FRMD4A	-3.11407	0.069	0.225	1.26429e-40	4.51263e-36
Peritubular cells	SLIT3	-3.12083	0.034	0.104	7.6176e-17	2.71895e-12
Peritubular cells	CCDC26	-3.13128	0.041	0.159	4.8888e-26	1.74496e-21
Peritubular cells	DGKB	-3.13689	0.037	0.134	4.52085e-22	1.61363e-17
Peritubular cells	UNC5D	-3.14795	0.031	0.113	2.84722e-18	1.01626e-13
Peritubular cells	AL627171.2	-3.15723	0.07	0.161	3.94976e-32	1.40979e-27
Peritubular cells	THSD7B	-3.1805	0.04	0.15	2.19333e-25	7.82867e-21
Peritubular cells	DNAJB1	-3.19462	0.063	0.163	3.12021e-26	1.1137e-21
Peritubular cells	NTM	-3.26431	0.042	0.127	2.532e-23	9.03748e-19
Peritubular cells	DEPP1	-3.26513	0.03	0.143	2.93543e-25	1.04774e-20
Peritubular cells	LRRC4C	-3.32428	0.054	0.193	4.87847e-35	1.74127e-30
Peritubular cells	PPP1R15A	-3.35088	0.021	0.109	1.38489e-18	4.94307e-14
Peritubular cells	CNTNAP2	-3.3765	0.123	0.411	1.5024e-91	5.36251e-87
Peritubular cells	SERPINE1	-3.4396	0.04	0.129	6.86226e-23	2.44935e-18
Peritubular cells	LUZP2	-3.44764	0.03	0.141	1.01359e-26	3.61782e-22
Peritubular cells	AC096570.1	-3.48919	0.022	0.106	5.23891e-19	1.86993e-14
Peritubular cells	AC016766.1	-3.49479	0.026	0.102	4.15259e-19	1.48218e-14
Peritubular cells	TMEM132D	-3.50826	0.034	0.14	1.78392e-28	6.36735e-24
Peritubular cells	AGBL1	-3.57175	0.034	0.148	2.65773e-28	9.48625e-24
Peritubular cells	HILPDA	-3.58538	0.019	0.125	8.75937e-25	3.12648e-20
Peritubular cells	NOS1	-3.69546	0.017	0.102	2.0981e-19	7.48876e-15
Peritubular cells	ADM	-3.70181	0.01	0.109	1.74584e-25	6.23142e-21
Peritubular cells	OPCML	-3.70428	0.038	0.152	6.58475e-29	2.35029e-24
Peritubular cells	CNTNAP5	-3.82844	0.031	0.166	1.6596e-33	5.92361e-29
Peritubular cells	CDH13	-3.87038	0.045	0.206	2.41463e-47	8.61853e-43
Peritubular cells	OBI1-AS1	-3.98936	0.018	0.104	6.41563e-22	2.28993e-17
Peritubular cells	CUX2	-4.07805	0.024	0.107	1.95696e-22	6.98499e-18
Peritubular cells	AC089983.1	-4.42533	0.017	0.138	3.49419e-32	1.24718e-27
Peritubular cells	LUCAT1	-5.01627	0.042	0.338	1.07329e-102	3.83089e-98
COVID-19 induced	AC006019.1	4.78187	0.122	0.01	8.5534e-23	3.05296e-18
COVID-19 induced	AC105402.3	4.50847	0.237	0.032	1.89621e-41	6.76815e-37
COVID-19 induced	AL161912.2	4.34286	0.103	0.004	1.84181e-22	6.57399e-18
COVID-19 induced	AL451165.2	3.74069	0.202	0.025	1.73152e-31	6.18032e-27
COVID-19 induced	MIR202HG	3.7189	0.372	0.06	6.10574e-57	2.17932e-52
COVID-19 induced	PRPS2	3.6534	0.163	0.027	1.68347e-22	6.00881e-18
COVID-19 induced	FAM229A	3.64195	0.119	0.017	2.26196e-17	8.07362e-13
COVID-19 induced	AC092666.1	3.62915	0.138	0.013	2.43231e-22	8.68164e-18
COVID-19 induced	RNASE1	3.56981	0.301	0.042	7.57733e-45	2.70458e-40
COVID-19 induced	PTGDS	3.50732	0.519	0.096	1.43845e-77	5.13425e-73
COVID-19 induced	HDAC4-AS1	3.38577	0.112	0.013	1.75502e-16	6.2642e-12
COVID-19 induced	TNP1	3.37648	0.468	0.122	4.40424e-74	1.57201e-69
COVID-19 induced	TMSB10	3.31234	0.224	0.049	9.8522e-26	3.51655e-21
COVID-19 induced	CPEB2-DT	3.28077	0.224	0.03	2.86391e-31	1.02222e-26
COVID-19 induced	PRND	3.22863	0.144	0.024	4.38346e-18	1.56459e-13
COVID-19 induced	MIF	3.20242	0.128	0.024	9.34137e-15	3.33421e-10
COVID-19 induced	ACTL7B	3.19238	0.106	0.017	6.66149e-14	2.37769e-09
COVID-19 induced	RPLP1	3.17538	0.404	0.097	2.48515e-50	8.87025e-46
COVID-19 induced	EPPIN	3.17303	0.109	0.016	3.37466e-14	1.20452e-09
COVID-19 induced	TIMP1	3.14762	0.125	0.038	1.35072e-12	4.82113e-08
COVID-19 induced	MAMLD1	3.04856	0.122	0.022	5.10495e-14	1.82211e-09
COVID-19 induced	SPARC	3.00757	0.282	0.063	8.71449e-33	3.11046e-28
COVID-19 induced	PWWP3B	2.99121	0.106	0.032	6.03906e-11	2.15552e-06
COVID-19 induced	LINC02388	2.96987	0.163	0.044	3.98125e-17	1.42103e-12
COVID-19 induced	SERPINA5	2.9539	0.208	0.047	7.35222e-22	2.62423e-17
COVID-19 induced	ACYP1	2.93904	0.106	0.022	8.05272e-11	2.87426e-06
COVID-19 induced	LINC01297	2.9362	0.276	0.076	3.27562e-30	1.16917e-25
COVID-19 induced	IGFBP7	2.93033	0.151	0.048	8.51227e-14	3.03829e-09
COVID-19 induced	DCN	2.91532	0.106	0.037	1.25375e-09	4.47502e-05
COVID-19 induced	AL355612.1	2.90279	0.218	0.041	8.64255e-25	3.08479e-20
COVID-19 induced	LINC01921	2.88964	0.163	0.026	1.68812e-20	6.02542e-16
COVID-19 induced	ERBB4	2.83297	0.663	0.237	8.05976e-82	2.87677e-77
COVID-19 induced	DEFB119	2.81879	0.138	0.035	5.57224e-13	1.9889e-08
COVID-19 induced	LINC00668	2.80746	0.154	0.028	2.96297e-17	1.05757e-12
COVID-19 induced	CST3	2.78667	0.279	0.064	2.38954e-30	8.52898e-26
COVID-19 induced	ADGRG1	2.75117	0.109	0.031	7.52181e-10	2.68476e-05
COVID-19 induced	COL1A2	2.74301	0.221	0.046	1.82986e-23	6.53131e-19
COVID-19 induced	PRM1	2.7322	0.513	0.224	1.71333e-74	6.1154e-70
COVID-19 induced	PAK3	2.71429	0.151	0.045	1.55102e-14	5.53605e-10
COVID-19 induced	CD81	2.71324	0.106	0.032	6.99107e-09	0.000249532
COVID-19 induced	LINC00395	2.70502	0.147	0.018	7.11895e-21	2.54097e-16
COVID-19 induced	AC004936.1	2.70472	0.276	0.073	1.31099e-27	4.67931e-23
COVID-19 induced	C20orf144	2.70124	0.122	0.019	9.02622e-15	3.22173e-10
COVID-19 induced	LINC02367	2.69684	0.212	0.044	1.71104e-22	6.10723e-18
COVID-19 induced	MEG8	2.65268	0.176	0.057	1.57004e-15	5.60395e-11
COVID-19 induced	ETNK1	2.62861	0.304	0.101	6.83191e-28	2.43851e-23
COVID-19 induced	SCN9A	2.61864	0.173	0.043	9.92522e-16	3.54261e-11
COVID-19 induced	SERPINF1	2.5812	0.115	0.032	2.14374e-09	7.65166e-05
COVID-19 induced	SPACA1	2.57618	0.109	0.019	2.27502e-12	8.12023e-08
COVID-19 induced	AL137856.1	2.56084	0.215	0.044	3.61601e-22	1.29066e-17
COVID-19 induced	MBNL3	2.55973	0.157	0.045	1.47759e-12	5.27395e-08
COVID-19 induced	CEPT1	2.5328	0.163	0.048	1.65981e-13	5.92435e-09
COVID-19 induced	EXTL2	2.52405	0.115	0.024	2.36728e-11	8.44954e-07
COVID-19 induced	MGAT4D	2.51095	0.186	0.039	6.26381e-19	2.23574e-14
COVID-19 induced	FANCL	2.50866	0.266	0.083	4.05268e-23	1.44652e-18
COVID-19 induced	RPL10	2.47367	0.141	0.061	4.26481e-12	1.52224e-07
COVID-19 induced	SLAIN1	2.46759	0.109	0.036	2.95245e-08	0.00105382
COVID-19 induced	TTC8	2.46185	0.202	0.056	2.52433e-16	9.01008e-12
COVID-19 induced	DPY19L1	2.44439	0.244	0.055	2.02211e-23	7.21751e-19
COVID-19 induced	CYP19A1	2.43785	0.176	0.033	1.25402e-18	4.47597e-14
COVID-19 induced	CADM1	2.43453	0.478	0.173	1.02563e-46	3.66077e-42
COVID-19 induced	TMCO2	2.41974	0.122	0.025	2.09527e-12	7.47866e-08
COVID-19 induced	MT-CO3	2.40621	0.974	0.536	5.45154e-153	1.94582e-148
COVID-19 induced	C12orf57	2.38981	0.103	0.028	4.22223e-08	0.00150704
COVID-19 induced	TUBA1B	2.37905	0.163	0.058	2.98503e-11	1.06545e-06
COVID-19 induced	DCAF8L2	2.36584	0.163	0.052	1.87443e-11	6.69042e-07
COVID-19 induced	MYL6	2.36559	0.186	0.071	2.0345e-13	7.26175e-09
COVID-19 induced	NABP1	2.35643	0.125	0.03	3.37818e-11	1.20577e-06
COVID-19 induced	AC126323.2	2.34975	0.218	0.041	1.26574e-23	4.5178e-19
COVID-19 induced	RNF13	2.3456	0.24	0.079	6.84457e-18	2.44303e-13
COVID-19 induced	HMGB4	2.34352	0.327	0.068	3.62122e-35	1.29252e-30
COVID-19 induced	RPS21	2.34039	0.218	0.085	9.89856e-16	3.53309e-11
COVID-19 induced	LAMA2	2.33086	0.311	0.138	9.29257e-22	3.3168e-17
COVID-19 induced	SS18	2.32565	0.304	0.109	4.06875e-23	1.45226e-18
COVID-19 induced	BTG4	2.31761	0.179	0.033	1.2875e-19	4.59548e-15
COVID-19 induced	MT-ND1	2.31165	0.907	0.395	1.16817e-110	4.16955e-106
COVID-19 induced	AP000787.1	2.28216	0.103	0.025	1.02704e-08	0.000366581
COVID-19 induced	C2orf88	2.2787	0.362	0.131	5.65926e-30	2.01996e-25
COVID-19 induced	PDZRN4	2.26968	0.163	0.066	1.35531e-10	4.8375e-06
COVID-19 induced	VGLL3	2.25655	0.125	0.031	8.44189e-11	3.01316e-06
COVID-19 induced	MT-ND3	2.25613	0.952	0.409	2.749e-124	9.81201e-120
COVID-19 induced	ZNF385B	2.24896	0.314	0.104	1.53293e-23	5.47148e-19
COVID-19 induced	CD63	2.24807	0.109	0.046	8.45966e-07	0.0301951
COVID-19 induced	SLC25A40	2.24197	0.141	0.039	1.44241e-10	5.14838e-06
COVID-19 induced	C11orf71	2.23638	0.115	0.024	1.15053e-11	4.10659e-07
COVID-19 induced	AL390860.1	2.23318	0.279	0.085	2.14341e-23	7.65046e-19
COVID-19 induced	ABCA8	2.23029	0.128	0.044	6.35891e-09	0.000226969
COVID-19 induced	C4orf48	2.23016	0.112	0.039	1.70454e-07	0.00608403
COVID-19 induced	NUPR2	2.22748	0.141	0.036	9.4966e-12	3.38962e-07
COVID-19 induced	LINC01016	2.22647	0.135	0.025	2.24446e-14	8.01114e-10
COVID-19 induced	LINC01206	2.2251	0.417	0.149	5.82508e-34	2.07915e-29
COVID-19 induced	SGCE	2.22013	0.183	0.062	1.86101e-13	6.64249e-09
COVID-19 induced	LYPLAL1	2.20514	0.147	0.054	8.36359e-09	0.000298522
COVID-19 induced	UNC5C	2.20091	0.179	0.069	1.59638e-11	5.69796e-07
COVID-19 induced	AC091544.2	2.19755	0.125	0.02	6.28873e-15	2.24464e-10
COVID-19 induced	RBAKDN	2.19068	0.253	0.056	3.33896e-24	1.19177e-19
COVID-19 induced	RPL23	2.19033	0.176	0.084	6.18733e-12	2.20844e-07
COVID-19 induced	LINC02475	2.18788	0.109	0.024	2.12843e-10	7.59699e-06
COVID-19 induced	LINC01609	2.18588	0.135	0.039	1.24736e-10	4.45221e-06
COVID-19 induced	CMTM6	2.1733	0.147	0.053	4.33706e-09	0.000154803
COVID-19 induced	CDH2	2.16485	0.311	0.099	7.0445e-24	2.51439e-19
COVID-19 induced	FBLN2	2.16134	0.103	0.034	1.1467e-06	0.0409292
COVID-19 induced	SERINC1	2.16096	0.157	0.064	4.53044e-10	1.61705e-05
COVID-19 induced	CDC20B	2.15973	0.109	0.021	2.00209e-11	7.14605e-07
COVID-19 induced	WASL	2.15893	0.256	0.112	1.17504e-18	4.19406e-14
COVID-19 induced	NSUN3	2.15027	0.109	0.028	1.43387e-08	0.00051179
COVID-19 induced	PTN	2.15017	0.109	0.033	6.40435e-08	0.0022859
COVID-19 induced	PRM2	2.14361	0.494	0.24	1.87581e-50	6.69533e-46
COVID-19 induced	GAS6	2.14135	0.106	0.047	7.44862e-07	0.0265864
COVID-19 induced	STARD13	2.14069	0.122	0.046	9.59506e-08	0.00342477
COVID-19 induced	TSSK6	2.134	0.103	0.034	3.05774e-07	0.010914
COVID-19 induced	FAM230C	2.12802	0.276	0.124	3.79146e-16	1.35329e-11
COVID-19 induced	RPS28	2.12794	0.256	0.1	2.23968e-17	7.9941e-13
COVID-19 induced	MAPK1IP1L	2.12695	0.128	0.064	1.91155e-07	0.0068229
COVID-19 induced	SGIP1	2.11717	0.119	0.038	2.99254e-08	0.00106813
COVID-19 induced	ITM2B	2.11414	0.179	0.081	3.59291e-12	1.28242e-07
COVID-19 induced	ARL15	2.10614	0.468	0.213	1.327e-32	4.73644e-28
COVID-19 induced	CFAP299	2.10468	0.516	0.256	1.24985e-41	4.46108e-37
COVID-19 induced	CLEC2D	2.10166	0.141	0.054	6.44501e-09	0.000230042
COVID-19 induced	REEP1	2.09265	0.151	0.063	1.02372e-09	3.65396e-05
COVID-19 induced	B2M	2.09131	0.147	0.055	3.9392e-09	0.000140602
COVID-19 induced	EBF1	2.09016	0.192	0.095	1.38727e-11	4.95158e-07
COVID-19 induced	MARCH11	2.08017	0.192	0.056	8.67409e-15	3.09604e-10
COVID-19 induced	AC090825.1	2.07871	0.304	0.105	4.7969e-22	1.71216e-17
COVID-19 induced	AC007319.1	2.07859	0.506	0.223	2.89812e-43	1.03442e-38
COVID-19 induced	COX20	2.07824	0.208	0.058	3.06593e-16	1.09432e-11
COVID-19 induced	MT-ATP6	2.07639	0.92	0.414	2.49801e-101	8.91616e-97
COVID-19 induced	FTX	2.07423	0.276	0.111	3.63364e-18	1.29695e-13
COVID-19 induced	HMGN5	2.07301	0.131	0.047	2.90123e-08	0.00103554
COVID-19 induced	DKKL1	2.06847	0.192	0.053	1.88289e-14	6.72062e-10
COVID-19 induced	SAT1	2.06816	0.157	0.049	4.14676e-12	1.4801e-07
COVID-19 induced	ZNF736	2.05916	0.179	0.056	1.97164e-12	7.03737e-08
COVID-19 induced	CA8	2.05766	0.208	0.074	1.69765e-13	6.0594e-09
COVID-19 induced	ACTB	2.04707	0.353	0.178	3.39145e-25	1.21051e-20
COVID-19 induced	CLU	2.04392	0.638	0.27	9.78584e-49	3.49286e-44
COVID-19 induced	CYLC2	2.04193	0.122	0.023	8.76112e-13	3.12711e-08
COVID-19 induced	GCSAML	2.04164	0.125	0.03	1.06901e-10	3.81562e-06
COVID-19 induced	AL590705.1	2.0381	0.157	0.042	3.16343e-12	1.12912e-07
COVID-19 induced	COX17	2.02365	0.138	0.074	6.16383e-08	0.00220006
COVID-19 induced	SMKR1	2.02198	0.125	0.036	2.26964e-09	8.10102e-05
COVID-19 induced	PRDX6	2.0214	0.157	0.066	4.3848e-09	0.000156507
COVID-19 induced	SLC9A3-AS1	2.01886	0.115	0.031	6.43671e-09	0.000229745
COVID-19 induced	PPP1CB	2.01227	0.228	0.101	1.13724e-12	4.05916e-08
COVID-19 induced	APOA1	2.01083	0.272	0.104	3.06117e-17	1.09263e-12
COVID-19 induced	PES1	2.00927	0.157	0.055	2.53702e-09	9.05539e-05
COVID-19 induced	CARMIL1	2.00401	0.304	0.126	3.64882e-20	1.30237e-15
COVID-19 induced	PTDSS2	-2.00029	0.045	0.177	8.48593e-11	3.02888e-06
COVID-19 induced	FAM178B	-2.00667	0.054	0.154	3.65449e-07	0.013044
COVID-19 induced	NPIPB5	-2.00798	0.071	0.236	1.68487e-13	6.01381e-09
COVID-19 induced	TKTL1	-2.00876	0.147	0.338	1.46138e-16	5.21611e-12
COVID-19 induced	BEND2	-2.01105	0.038	0.133	1.75076e-07	0.00624898
COVID-19 induced	SNRPA	-2.02295	0.032	0.163	8.92446e-12	3.18541e-07
COVID-19 induced	EIF5B	-2.02674	0.298	0.58	1.76277e-33	6.29184e-29
COVID-19 induced	NPAP1	-2.02909	0.022	0.101	7.39833e-07	0.0264069
COVID-19 induced	PCNT	-2.03028	0.253	0.569	2.65575e-34	9.47916e-30
COVID-19 induced	SLU7	-2.03066	0.042	0.172	8.14432e-11	2.90695e-06
COVID-19 induced	TOP2A	-2.03163	0.308	0.47	4.83914e-27	1.72723e-22
COVID-19 induced	USP36	-2.03444	0.071	0.243	9.94523e-14	3.54975e-09
COVID-19 induced	LRRCC1	-2.03648	0.135	0.246	3.08584e-09	0.000110143
COVID-19 induced	LINC02006	-2.03845	0.026	0.122	1.83542e-08	0.000655115
COVID-19 induced	VAMP8	-2.03922	0.058	0.186	1.3543e-09	4.8339e-05
COVID-19 induced	AC240274.1	-2.04031	0.067	0.162	1.01805e-06	0.0363373
COVID-19 induced	ABCA3	-2.0407	0.051	0.186	1.02283e-10	3.65079e-06
COVID-19 induced	DNAJB6	-2.04232	0.208	0.456	4.67369e-26	1.66818e-21
COVID-19 induced	CLSPN	-2.04791	0.151	0.349	1.6967e-17	6.05601e-13
COVID-19 induced	HSPA8	-2.05571	0.176	0.462	3.89929e-27	1.39177e-22
COVID-19 induced	WDR76	-2.06076	0.058	0.203	1.59095e-11	5.67857e-07
COVID-19 induced	PER3	-2.06196	0.192	0.462	1.28477e-24	4.58572e-20
COVID-19 induced	BRD2	-2.0634	0.26	0.5	1.45498e-31	5.19326e-27
COVID-19 induced	POTEE	-2.06579	0.093	0.206	1.91879e-09	6.84875e-05
COVID-19 induced	ZNF844	-2.06762	0.125	0.297	2.86231e-14	1.02165e-09
COVID-19 induced	PRPF38B	-2.06832	0.154	0.353	1.32202e-15	4.71869e-11
COVID-19 induced	SMARCA4	-2.07081	0.173	0.434	1.23534e-22	4.40931e-18
COVID-19 induced	MDN1	-2.07333	0.147	0.413	4.85214e-23	1.73187e-18
COVID-19 induced	DHX34	-2.07638	0.147	0.377	8.96054e-22	3.19829e-17
COVID-19 induced	BRIX1	-2.08684	0.022	0.107	1.87316e-07	0.00668588
COVID-19 induced	NOP58	-2.08718	0.096	0.347	1.01558e-22	3.6249e-18
COVID-19 induced	LRSAM1	-2.08919	0.048	0.181	9.20852e-11	3.2868e-06
COVID-19 induced	NOM1	-2.09847	0.051	0.247	5.29875e-18	1.89128e-13
COVID-19 induced	MTRNR2L12	-2.10618	0.196	0.555	1.8212e-35	6.5004e-31
COVID-19 induced	TICRR	-2.10703	0.051	0.171	1.36631e-09	4.87676e-05
COVID-19 induced	ELOA	-2.10817	0.058	0.207	5.13867e-12	1.83415e-07
COVID-19 induced	PHRF1	-2.10878	0.058	0.195	5.57646e-11	1.99041e-06
COVID-19 induced	TARS	-2.12755	0.061	0.189	1.12154e-09	4.00311e-05
COVID-19 induced	RBFOX1	-2.13301	0.186	0.499	1.66615e-30	5.947e-26
COVID-19 induced	SMC3	-2.13329	0.24	0.47	8.00161e-27	2.85602e-22
COVID-19 induced	SMG1	-2.14135	0.34	0.697	6.89208e-59	2.45999e-54
COVID-19 induced	CHD8	-2.15131	0.122	0.397	1.83441e-25	6.54756e-21
COVID-19 induced	FKBP4	-2.16024	0.071	0.255	1.61844e-15	5.77669e-11
COVID-19 induced	OGFOD1	-2.16203	0.029	0.112	8.95217e-07	0.031953
COVID-19 induced	CDK11A	-2.16259	0.093	0.316	1.44769e-19	5.16724e-15
COVID-19 induced	SPAG5	-2.16867	0.042	0.156	2.47124e-09	8.8206e-05
COVID-19 induced	TTN	-2.17359	0.122	0.272	1.40971e-11	5.03166e-07
COVID-19 induced	CNTNAP5	-2.18042	0.038	0.153	2.41264e-09	8.61145e-05
COVID-19 induced	MPHOSPH8	-2.18458	0.212	0.498	2.56382e-31	9.15104e-27
COVID-19 induced	VCX3A	-2.18537	0.08	0.222	3.78201e-11	1.34991e-06
COVID-19 induced	CLK3	-2.18714	0.071	0.247	3.99069e-15	1.4244e-10
COVID-19 induced	NGDN	-2.19079	0.042	0.164	5.28608e-10	1.88676e-05
COVID-19 induced	FAM161A	-2.1928	0.08	0.243	1.95186e-13	6.96676e-09
COVID-19 induced	TTF2	-2.19613	0.071	0.217	2.17753e-11	7.77226e-07
COVID-19 induced	KIF1C	-2.20816	0.051	0.193	1.54358e-11	5.50949e-07
COVID-19 induced	PRRC2C	-2.21555	0.337	0.734	1.06763e-57	3.8107e-53
COVID-19 induced	H1F0	-2.21808	0.048	0.156	3.11056e-08	0.00111025
COVID-19 induced	ZNF155	-2.24441	0.051	0.173	1.65267e-09	5.89886e-05
COVID-19 induced	SUPT16H	-2.24497	0.154	0.451	3.16691e-29	1.13037e-24
COVID-19 induced	BCLAF3	-2.24532	0.064	0.21	7.74378e-12	2.76399e-07
COVID-19 induced	HSPA1L	-2.25408	0.038	0.214	7.08764e-17	2.52979e-12
COVID-19 induced	TPR	-2.25615	0.369	0.641	5.20701e-40	1.85854e-35
COVID-19 induced	ZNF850	-2.2569	0.083	0.192	5.45721e-09	0.000194784
COVID-19 induced	RNMT	-2.25897	0.179	0.455	1.62117e-27	5.78643e-23
COVID-19 induced	TUBGCP6	-2.25909	0.029	0.142	5.6665e-10	2.02254e-05
COVID-19 induced	TCOF1	-2.27939	0.051	0.181	3.0536e-10	1.08992e-05
COVID-19 induced	SRRM2	-2.2813	0.34	0.718	1.88595e-60	6.73153e-56
COVID-19 induced	PTMA	-2.28856	0.333	0.638	1.71204e-37	6.11079e-33
COVID-19 induced	GADD45B	-2.29738	0.048	0.168	1.82405e-09	6.5106e-05
COVID-19 induced	KARS	-2.31589	0.061	0.18	2.75001e-09	9.81561e-05
COVID-19 induced	CCDC137	-2.32348	0.054	0.168	6.27648e-09	0.000224027
COVID-19 induced	AC092100.1	-2.32901	0.026	0.156	1.80043e-12	6.42626e-08
COVID-19 induced	LINC00276	-2.32966	0.022	0.107	1.89049e-07	0.00674773
COVID-19 induced	LRRC4C	-2.33494	0.032	0.198	1.78363e-16	6.36631e-12
COVID-19 induced	AHNAK	-2.33556	0.067	0.292	9.96113e-21	3.55543e-16
COVID-19 induced	CCDC88C	-2.34109	0.029	0.132	6.96945e-09	0.000248761
COVID-19 induced	LRRTM4	-2.36996	0.022	0.105	3.37166e-07	0.0120345
COVID-19 induced	PASD1	-2.37816	0.061	0.21	2.0305e-12	7.24746e-08
COVID-19 induced	BAZ1B	-2.37867	0.218	0.607	1.5523e-50	5.54061e-46
COVID-19 induced	PPP1R15A	-2.39936	0.045	0.14	2.0632e-07	0.00736417
COVID-19 induced	CTCFL	-2.44092	0.051	0.175	4.14754e-10	1.48038e-05
COVID-19 induced	CCDC174	-2.45359	0.061	0.189	2.46934e-10	8.81383e-06
COVID-19 induced	ZNF441	-2.46277	0.029	0.113	6.22711e-07	0.0222264
COVID-19 induced	ZNF778	-2.4734	0.067	0.233	1.03488e-14	3.69378e-10
COVID-19 induced	GCNA	-2.48447	0.032	0.184	1.8433e-14	6.5793e-10
COVID-19 induced	KCNMB3	-2.48926	0.019	0.103	1.2236e-07	0.0043674
COVID-19 induced	GML	-2.49021	0.119	0.347	6.03068e-22	2.15253e-17
COVID-19 induced	PLEKHG4B	-2.49479	0.032	0.119	1.21409e-07	0.00433345
COVID-19 induced	SNX31	-2.52359	0.022	0.179	2.25964e-16	8.06535e-12
COVID-19 induced	KIF1A	-2.5367	0.029	0.122	7.75609e-08	0.00276838
COVID-19 induced	CCDC59	-2.54899	0.061	0.255	1.27634e-17	4.55565e-13
COVID-19 induced	LINC00877	-2.55284	0.071	0.267	3.92237e-18	1.40001e-13
COVID-19 induced	AC007262.2	-2.56094	0.032	0.116	4.42619e-07	0.0157984
COVID-19 induced	SPEN	-2.59601	0.176	0.54	3.36745e-45	1.20195e-40
COVID-19 induced	CENPF	-2.64105	0.212	0.403	1.29588e-20	4.62537e-16
COVID-19 induced	OTUD6A	-2.64983	0.026	0.166	1.07119e-13	3.8234e-09
COVID-19 induced	ZNF701	-2.67675	0.026	0.113	1.59645e-07	0.0056982
COVID-19 induced	JUN	-2.6796	0.045	0.198	1.66267e-13	5.93457e-09
COVID-19 induced	NOP2	-2.68915	0.038	0.144	4.11177e-09	0.000146761
COVID-19 induced	PSTPIP2	-2.71236	0.019	0.135	1.46799e-11	5.2397e-07
COVID-19 induced	HSP90B1	-2.72261	0.317	0.541	3.69409e-31	1.31853e-26
COVID-19 induced	HSPA5	-2.83673	0.288	0.522	3.20293e-29	1.14322e-24
COVID-19 induced	COLEC11	-2.84852	0.013	0.107	9.23048e-10	3.29464e-05
COVID-19 induced	AC010624.5	-2.8669	0.01	0.157	9.29149e-18	3.31641e-13
COVID-19 induced	STIP1	-2.92058	0.103	0.451	3.67156e-42	1.31049e-37
COVID-19 induced	SORCS2	-2.93399	0.032	0.143	8.13549e-10	2.9038e-05
COVID-19 induced	PNMA6E	-2.93996	0.016	0.12	1.79868e-10	6.42001e-06
COVID-19 induced	CMYA5	-2.94146	0.035	0.28	6.55638e-27	2.34017e-22
COVID-19 induced	PNLDC1	-2.97043	0.019	0.138	6.55367e-12	2.3392e-07
COVID-19 induced	MFAP1	-3.01186	0.035	0.161	2.73681e-11	9.76851e-07
COVID-19 induced	CHD3	-3.01674	0.071	0.305	4.79432e-24	1.71124e-19
COVID-19 induced	HSPD1	-3.01686	0.08	0.372	4.43986e-33	1.58472e-28
COVID-19 induced	TRMT6	-3.03904	0.026	0.113	9.36771e-08	0.00334362
COVID-19 induced	LINC02073	-3.04264	0.022	0.122	3.008e-09	0.000107364
COVID-19 induced	HSP90AB1	-3.15034	0.244	0.617	1.04766e-55	3.73941e-51
COVID-19 induced	ZNF14	-3.17271	0.029	0.135	8.628e-10	3.07959e-05
COVID-19 induced	AC116317.1	-3.22499	0.038	0.14	1.60707e-09	5.73613e-05
COVID-19 induced	AC245060.5	-3.2979	0.029	0.17	1.49451e-13	5.33435e-09
COVID-19 induced	WDR87	-3.32914	0.115	0.254	2.36214e-16	8.4312e-12
COVID-19 induced	AL354920.1	-3.33626	0.013	0.113	1.35746e-10	4.84517e-06
COVID-19 induced	ECT2L	-3.42726	0.016	0.112	1.43468e-09	5.12081e-05
COVID-19 induced	CDK11B	-3.47622	0.048	0.303	1.30922e-28	4.67299e-24
COVID-19 induced	POM121L2	-3.48158	0.029	0.187	2.88514e-16	1.02979e-11
COVID-19 induced	HSP90AA1	-3.66592	0.635	0.918	1.46908e-158	5.24358e-154
COVID-19 induced	HSPH1	-3.66645	0.196	0.564	7.29233e-60	2.60285e-55
COVID-19 induced	ZNF418	-3.78198	0.016	0.132	3.44567e-12	1.22986e-07
COVID-19 induced	DNAJB1	-4.23294	0.147	0.643	1.03317e-83	3.68768e-79
COVID-19 induced	HSPA1A	-4.53616	0.077	0.399	1.18468e-41	4.22849e-37
COVID-19 induced	PARD6G-AS1	-4.59118	0.022	0.176	2.24539e-17	8.01445e-13
COVID-19 induced	NKAIN1	-4.82679	0.013	0.104	5.50404e-10	1.96456e-05
COVID-19 induced	HSPA1B	-4.85052	0.051	0.41	3.34468e-49	1.19382e-44
COVID-19 induced	AL627171.2	-5.0012	0.045	0.618	8.96136e-96	3.19858e-91
COVID-19 induced	TAF1L	-5.18042	0.013	0.146	8.15403e-16	2.91042e-11
COVID-19 induced	RBFOX3	-5.72293	0.006	0.126	8.24708e-15	2.94363e-10
COVID-19 induced	RPS10-NUDT3	-6.02073	0.003	0.116	1.72463e-14	6.15571e-10
COVID-19 induced	HSPA6	-6.11811	0.006	0.205	4.35098e-26	1.55299e-21
COVID-19 induced	AL590434.1	-6.37607	0.003	0.132	9.66037e-17	3.44808e-12
COVID-19 induced	AC108134.2	-9.48323	0	0.103	2.3581e-15	8.41677e-11
Spermatogonia	RBAKDN	5.78441	0.273	0.004	0	0
Spermatogonia	NDUFAF3	5.26649	0.115	0.003	5.42403e-270	1.936e-265
Spermatogonia	HIST1H2AA	4.96824	0.36	0.009	0	0
Spermatogonia	FAU	4.92448	0.216	0.005	0	0
Spermatogonia	FAM229A	4.7389	0.126	0.003	7.57982e-295	2.70546e-290
Spermatogonia	AL133499.1	4.69118	0.107	0.001	1.02899e-264	3.67276e-260
Spermatogonia	TNP1	4.54644	0.605	0.031	0	0
Spermatogonia	C5orf58	4.46885	0.238	0.007	0	0
Spermatogonia	HMGB4	4.35881	0.316	0.01	0	0
Spermatogonia	MIR202HG	4.35004	0.327	0.01	0	0
Spermatogonia	GPX4	4.19452	0.353	0.013	0	0
Spermatogonia	RPLP1	4.15266	0.449	0.019	0	0
Spermatogonia	PPP1R35	4.14867	0.114	0.005	1.51563e-244	5.40973e-240
Spermatogonia	POLR2I	4.09083	0.121	0.003	2.69309e-282	9.61243e-278
Spermatogonia	LRWD1	4.09	0.134	0.005	3.81742e-300	1.36255e-295
Spermatogonia	RPL15	4.0737	0.353	0.018	0	0
Spermatogonia	TUBB4B	3.99279	0.351	0.018	0	0
Spermatogonia	NDUFB4	3.97953	0.101	0.005	5.18616e-209	1.8511e-204
Spermatogonia	RABAC1	3.9438	0.112	0.005	1.64305e-240	5.86454e-236
Spermatogonia	H2AFJ	3.92955	0.318	0.01	0	0
Spermatogonia	ROMO1	3.9136	0.127	0.004	2.47836e-291	8.84601e-287
Spermatogonia	RPL29	3.81301	0.2	0.011	0	0
Spermatogonia	SSNA1	3.78498	0.102	0.004	2.74102e-220	9.78354e-216
Spermatogonia	LINC01921	3.73895	0.19	0.007	0	0
Spermatogonia	RPS14	3.70162	0.26	0.014	0	0
Spermatogonia	ALKBH7	3.70121	0.223	0.008	0	0
Spermatogonia	COX7A2	3.57663	0.275	0.009	0	0
Spermatogonia	RPS28	3.56305	0.314	0.016	0	0
Spermatogonia	TSACC	3.53828	0.305	0.012	0	0
Spermatogonia	ZPBP2	3.52602	0.12	0.004	2.55593e-273	9.1229e-269
Spermatogonia	HINT1	3.49721	0.177	0.006	0	0
Spermatogonia	AURKAIP1	3.46067	0.19	0.01	0	0
Spermatogonia	CD81	3.4553	0.13	0.005	4.071e-291	1.45306e-286
Spermatogonia	UBL5	3.42872	0.186	0.012	0	0
Spermatogonia	RPL7A	3.41434	0.309	0.019	0	0
Spermatogonia	MIF	3.40384	0.126	0.005	8.66587e-276	3.09311e-271
Spermatogonia	OST4	3.39377	0.101	0.006	1.24124e-197	4.43037e-193
Spermatogonia	RNASE1	3.38938	0.305	0.015	0	0
Spermatogonia	CST3	3.3857	0.366	0.019	0	0
Spermatogonia	PRM1	3.38331	0.654	0.091	0	0
Spermatogonia	RPL41	3.35983	0.321	0.02	0	0
Spermatogonia	TUBA3C	3.35755	0.17	0.006	0	0
Spermatogonia	MT-ND3	3.35198	0.985	0.139	0	0
Spermatogonia	CETN1	3.34755	0.129	0.005	2.28967e-293	8.17251e-289
Spermatogonia	COX17	3.3413	0.127	0.011	1.72701e-231	6.16421e-227
Spermatogonia	LINC01001	3.31584	0.143	0.006	0	2.87751e-306
Spermatogonia	RPS21	3.29875	0.295	0.02	0	0
Spermatogonia	COX6C	3.27864	0.278	0.019	0	0
Spermatogonia	RPLP0	3.26645	0.216	0.011	0	0
Spermatogonia	IZUMO4	3.22557	0.172	0.007	0	0
Spermatogonia	RPS18	3.20742	0.309	0.02	0	0
Spermatogonia	RPS13	3.19494	0.161	0.008	0	0
Spermatogonia	AC105402.3	3.18163	0.226	0.013	0	0
Spermatogonia	PDCD5	3.17938	0.198	0.014	0	0
Spermatogonia	RPS23	3.17271	0.295	0.02	0	0
Spermatogonia	PRM2	3.16914	0.633	0.075	0	0
Spermatogonia	MARCKSL1	3.1648	0.111	0.008	5.4197e-210	1.93446e-205
Spermatogonia	H2AFZ	3.16031	0.132	0.009	6.02041e-261	2.14886e-256
Spermatogonia	EPPIN	3.15106	0.114	0.006	6.21933e-246	2.21986e-241
Spermatogonia	PLEKHG4	3.15011	0.104	0.006	2.00823e-207	7.16796e-203
Spermatogonia	SAYSD1	3.14553	0.105	0.006	8.53945e-210	3.04798e-205
Spermatogonia	TMSB10	3.14324	0.255	0.018	0	0
Spermatogonia	COX4I1	3.13328	0.191	0.013	0	0
Spermatogonia	SRP14	3.11186	0.262	0.02	0	0
Spermatogonia	OBSL1	3.10322	0.17	0.008	0	0
Spermatogonia	PTGDS	3.07921	0.512	0.031	0	0
Spermatogonia	GABARAP	3.07732	0.131	0.007	3.95028e-272	1.40997e-267
Spermatogonia	AC136616.1	3.07208	0.104	0.008	3.53292e-190	1.261e-185
Spermatogonia	ACRBP	3.07144	0.103	0.005	4.55871e-219	1.62714e-214
Spermatogonia	LINC02125	3.06086	0.221	0.017	0	0
Spermatogonia	CATSPERZ	3.05355	0.21	0.008	0	0
Spermatogonia	MMADHC	3.05151	0.138	0.008	1.632e-286	5.82509e-282
Spermatogonia	TAF9	3.04304	0.103	0.006	6.44935e-205	2.30197e-200
Spermatogonia	FMC1	3.01908	0.121	0.006	3.88093e-259	1.38522e-254
Spermatogonia	AL162231.1	3.01304	0.179	0.01	0	0
Spermatogonia	C4orf48	3.00399	0.186	0.012	0	0
Spermatogonia	MT-ATP6	2.97912	0.975	0.155	0	0
Spermatogonia	ELOB	2.96627	0.312	0.024	0	0
Spermatogonia	ATP5IF1	2.9563	0.231	0.012	0	0
Spermatogonia	RPS16	2.95085	0.205	0.016	0	0
Spermatogonia	RPS15	2.94747	0.262	0.022	0	0
Spermatogonia	TRMT112	2.93539	0.125	0.009	9.01685e-239	3.21838e-234
Spermatogonia	GSTM3	2.92914	0.227	0.014	0	0
Spermatogonia	RPS2	2.90886	0.272	0.02	0	0
Spermatogonia	DRAP1	2.89776	0.122	0.009	8.34377e-235	2.97814e-230
Spermatogonia	SPINK2	2.88085	0.278	0.014	0	0
Spermatogonia	COX6A1	2.87046	0.136	0.009	1.05376e-270	3.76119e-266
Spermatogonia	PRND	2.86339	0.138	0.006	0	3.28281e-308
Spermatogonia	GNG5	2.85577	0.113	0.006	1.039e-231	3.70849e-227
Spermatogonia	UQCR10	2.85198	0.151	0.012	5.21589e-288	1.86171e-283
Spermatogonia	SCML1	2.8435	0.205	0.015	0	0
Spermatogonia	AC093838.1	2.84329	0.254	0.028	0	0
Spermatogonia	RPL36AL	2.83901	0.152	0.011	9.62986e-305	3.43719e-300
Spermatogonia	TUBA1B	2.82424	0.194	0.02	0	0
Spermatogonia	RPL18	2.82335	0.232	0.018	0	0
Spermatogonia	COX7C	2.81112	0.179	0.012	0	0
Spermatogonia	ATP5MF	2.80776	0.124	0.011	1.09492e-226	3.90808e-222
Spermatogonia	CEPT1	2.80256	0.329	0.027	0	0
Spermatogonia	COX20	2.78497	0.187	0.014	0	0
Spermatogonia	POMP	2.77898	0.184	0.014	0	0
Spermatogonia	BOD1L2	2.74704	0.171	0.009	0	0
Spermatogonia	COPS9	2.72314	0.104	0.008	2.7243e-194	9.72385e-190
Spermatogonia	AL359987.1	2.71309	0.137	0.017	2.06611e-220	7.37456e-216
Spermatogonia	EEF1A1	2.71086	0.521	0.048	0	0
Spermatogonia	KRTCAP2	2.69597	0.137	0.01	1.35107e-267	4.82238e-263
Spermatogonia	CMTM2	2.69226	0.211	0.012	0	0
Spermatogonia	RPS17	2.66064	0.168	0.015	0	9.83916e-308
Spermatogonia	GIHCG	2.65934	0.183	0.011	0	0
Spermatogonia	PPDPF	2.63515	0.101	0.008	1.51247e-187	5.39846e-183
Spermatogonia	HIST1H4C	2.63328	0.189	0.021	0	0
Spermatogonia	AC015871.1	2.62213	0.123	0.01	6.15329e-230	2.1963e-225
Spermatogonia	MRPL51	2.61816	0.138	0.01	2.68015e-278	9.56625e-274
Spermatogonia	LAPTM4A	2.6181	0.276	0.021	0	0
Spermatogonia	ORMDL1	2.60925	0.167	0.014	0	0
Spermatogonia	CPEB2	2.6038	0.33	0.026	0	0
Spermatogonia	RPL23	2.60201	0.156	0.012	2.53761e-299	9.05748e-295
Spermatogonia	MT-CO3	2.59996	0.995	0.267	0	0
Spermatogonia	PFDN5	2.59866	0.219	0.018	0	0
Spermatogonia	HMGN1	2.58574	0.33	0.033	0	0
Spermatogonia	LINC01297	2.58136	0.318	0.031	0	0
Spermatogonia	SEC61B	2.57306	0.12	0.009	1.74047e-230	6.21225e-226
Spermatogonia	RPL9	2.57036	0.264	0.023	0	0
Spermatogonia	MZT2B	2.56849	0.143	0.012	4.73736e-272	1.69091e-267
Spermatogonia	RPLP2	2.54215	0.351	0.032	0	0
Spermatogonia	CALM3	2.53508	0.28	0.021	0	0
Spermatogonia	UQCC2	2.52692	0.176	0.017	0	0
Spermatogonia	SNHG6	2.51507	0.109	0.01	5.4442e-194	1.9432e-189
Spermatogonia	TUFM	2.5144	0.135	0.014	1.55458e-232	5.54875e-228
Spermatogonia	SERPINA5	2.49475	0.203	0.014	0	0
Spermatogonia	TIMP1	2.49206	0.104	0.009	1.89925e-196	6.77898e-192
Spermatogonia	NORAD	2.48599	0.117	0.013	6.34487e-195	2.26467e-190
Spermatogonia	H3F3A	2.48479	0.347	0.038	0	0
Spermatogonia	BSG	2.48213	0.326	0.032	0	0
Spermatogonia	NUPR2	2.47166	0.14	0.009	1.05829e-305	3.77735e-301
Spermatogonia	ARL6IP6	2.44785	0.307	0.021	0	0
Spermatogonia	RPS27A	2.42657	0.285	0.027	0	0
Spermatogonia	CALM2	2.39743	0.486	0.058	0	0
Spermatogonia	TMEM99	2.39728	0.124	0.014	7.10447e-206	2.5358e-201
Spermatogonia	RPS3A	2.39706	0.297	0.028	0	0
Spermatogonia	RPL17	2.39629	0.284	0.03	0	0
Spermatogonia	SMCP	2.39609	0.123	0.008	1.53885e-263	5.49261e-259
Spermatogonia	TMEM259	2.38926	0.188	0.023	0	0
Spermatogonia	SERF2	2.38567	0.27	0.025	0	0
Spermatogonia	MT-ND1	2.38378	0.936	0.179	0	0
Spermatogonia	RPS19	2.38376	0.387	0.038	0	0
Spermatogonia	HSPA2	2.38132	0.131	0.013	6.88764e-236	2.45841e-231
Spermatogonia	RPS25	2.36766	0.278	0.031	0	0
Spermatogonia	APH1B	2.36418	0.222	0.018	0	0
Spermatogonia	RPS26	2.36377	0.134	0.011	2.55551e-262	9.12137e-258
Spermatogonia	RNF103	2.36327	0.192	0.016	0	0
Spermatogonia	REEP6	2.36001	0.112	0.009	1.39446e-221	4.97724e-217
Spermatogonia	RPL35A	2.35972	0.251	0.026	0	0
Spermatogonia	RPS11	2.35234	0.266	0.028	0	0
Spermatogonia	AC010983.1	2.34427	0.125	0.01	1.67782e-244	5.98865e-240
Spermatogonia	CCT7	2.3402	0.15	0.014	3.87999e-275	1.38488e-270
Spermatogonia	H3F3B	2.33908	0.504	0.047	0	0
Spermatogonia	RPL36	2.33802	0.284	0.029	0	0
Spermatogonia	REXO2	2.3378	0.147	0.012	1.04614e-287	3.73399e-283
Spermatogonia	HIST1H2BA	2.3313	0.309	0.036	0	0
Spermatogonia	CHCHD2	2.3311	0.15	0.014	1.43644e-273	5.12709e-269
Spermatogonia	ARL4A	2.33076	0.132	0.012	3.76387e-255	1.34344e-250
Spermatogonia	AL021368.2	2.32848	0.14	0.017	4.43924e-226	1.5845e-221
Spermatogonia	KRBOX1	2.32364	0.165	0.014	0	0
Spermatogonia	ENY2	2.32082	0.144	0.015	4.07351e-251	1.45396e-246
Spermatogonia	SPCS3	2.31535	0.136	0.011	4.22608e-263	1.50841e-258
Spermatogonia	ADRM1	2.30766	0.128	0.016	1.02483e-200	3.65794e-196
Spermatogonia	SURF4	2.30649	0.144	0.016	3.06026e-242	1.0923e-237
Spermatogonia	RPL18A	2.30498	0.147	0.012	7.76759e-286	2.77249e-281
Spermatogonia	FANCL	2.29407	0.417	0.045	0	0
Spermatogonia	SEC61G	2.29372	0.139	0.014	2.68574e-247	9.5862e-243
Spermatogonia	LINC02367	2.29272	0.186	0.014	0	0
Spermatogonia	FAM229B	2.28458	0.166	0.012	0	0
Spermatogonia	ANAPC11	2.28328	0.157	0.01	0	0
Spermatogonia	RPL34	2.28044	0.276	0.028	0	0
Spermatogonia	TOMM7	2.26449	0.151	0.013	6.1416e-291	2.19212e-286
Spermatogonia	TRIM28	2.26328	0.156	0.019	7.46177e-258	2.66333e-253
Spermatogonia	MPC2	2.26103	0.166	0.011	0	0
Spermatogonia	RPS7	2.26016	0.29	0.029	0	0
Spermatogonia	GHITM	2.26002	0.144	0.019	7.74094e-224	2.76297e-219
Spermatogonia	C5orf47	2.24932	0.318	0.032	0	0
Spermatogonia	FAM199X	2.24305	0.155	0.019	2.00383e-254	7.15227e-250
Spermatogonia	TMX4	2.24207	0.25	0.019	0	0
Spermatogonia	MRFAP1	2.24135	0.111	0.01	1.57907e-210	5.63617e-206
Spermatogonia	SLC9A3-AS1	2.23994	0.147	0.01	0	0
Spermatogonia	LPXN	2.23814	0.204	0.016	0	0
Spermatogonia	UBE2E3	2.23545	0.67	0.096	0	0
Spermatogonia	CHTF18	2.23445	0.144	0.014	4.19545e-272	1.49748e-267
Spermatogonia	AL121904.2	2.23396	0.312	0.03	0	0
Spermatogonia	ACP1	2.22607	0.13	0.017	3.9091e-199	1.39528e-194
Spermatogonia	MIR181A2HG	2.22338	0.181	0.012	0	0
Spermatogonia	SPARC	2.21791	0.271	0.024	0	0
Spermatogonia	FUS	2.21615	0.56	0.079	0	0
Spermatogonia	FBXL3	2.21483	0.198	0.026	0	0
Spermatogonia	RNF141	2.21309	0.133	0.012	1.33295e-246	4.75771e-242
Spermatogonia	RPL8	2.21188	0.239	0.026	0	0
Spermatogonia	LY6K	2.20958	0.127	0.017	1.73878e-202	6.20622e-198
Spermatogonia	HMGN3	2.20931	0.202	0.02	0	0
Spermatogonia	DPY19L2	2.20875	0.307	0.026	0	0
Spermatogonia	EIF1	2.20612	0.301	0.035	0	0
Spermatogonia	SYCE3	2.20245	0.119	0.008	1.99382e-270	7.11654e-266
Spermatogonia	RPL3	2.19875	0.359	0.034	0	0
Spermatogonia	EIF1B	2.18887	0.136	0.017	1.95939e-224	6.99364e-220
Spermatogonia	WASL	2.17711	0.398	0.047	0	0
Spermatogonia	TCP10L	2.17349	0.101	0.01	9.93307e-189	3.54541e-184
Spermatogonia	RPS27	2.16783	0.369	0.036	0	0
Spermatogonia	ATP5PB	2.16382	0.117	0.011	1.06303e-219	3.79426e-215
Spermatogonia	CTSV	2.1628	0.13	0.011	2.70242e-260	9.64575e-256
Spermatogonia	AASDHPPT	2.15454	0.119	0.011	1.85243e-220	6.61188e-216
Spermatogonia	RPS12	2.15206	0.353	0.044	0	0
[truncated: 4,192 more rows]

## Sheet: S.Table 5c. GO_BP_enrichment
Cell_Type	Analysis	Term	Overlap	P.value	Adjusted.P.value	Odds.Ratio	Combined.Score	Genes	dbs	GeneCount
All_cells	All_DEGs	Cytoplasmic Translation (GO:0002181)	'20/101	2.0372e-17	2.37742e-14	17.9506	689.885	RPL41;RPL34;RPL23;RPLP1;RPLP0;RPS14;RPL7A;RPS17;RPS28;RPS16;RPS18;RPLP2;RPL15;FAU;RPL29;RPL18;RPS27A;RPS21;RPS13;RPS23	GO_Biological_Process_2025	20
All_cells	All_DEGs	Macromolecule Biosynthetic Process (GO:0009059)	'21/189	5.27221e-13	3.07633e-10	9.08086	256.726	RPL41;RPL34;RPL23;RPLP1;RPLP0;EEF1A1;RPS14;RPL7A;RPS17;RPS28;RPS16;RPS18;RPLP2;RPL15;FAU;RPL29;RPL18;RPS27A;RPS21;RPS13;RPS23	GO_Biological_Process_2025	21
All_cells	All_DEGs	Translation (GO:0006412)	'22/232	3.65774e-12	1.42286e-09	7.6226	200.735	RPL41;RPL34;RPL23;RPLP1;RPLP0;EEF1A1;RPS14;RPL7A;RPS17;RPS28;RPS16;RPS18;RPLP2;RPL15;FAU;AURKAIP1;RPL29;RPL18;RPS27A;RPS21;RPS13;RPS23	GO_Biological_Process_2025	22
All_cells	All_DEGs	Gene Expression (GO:0010467)	'24/381	1.89874e-09	5.53957e-07	4.89114	98.2241	RPL41;RPL34;RPL23;RPLP1;RPLP0;EEF1A1;RPS14;RPL7A;RPS17;RPS28;RPS16;RPS18;NOVA1;RPLP2;RPL15;FAU;RPL29;AURKAIP1;RPL18;RPS27A;RPS21;RPS13;RPS23;ADAD2	GO_Biological_Process_2025	24
All_cells	All_DEGs	Protein Metabolic Process (GO:0019538)	'26/614	1.14246e-06	0.00026665	3.20277	43.8213	RPL34;RPLP1;RPLP0;RPS14;UBL5;RPL7A;RPS17;RPS16;APH1B;RPS18;RPLP2;RPL15;RPL18;RPS27A;CPA6;RPS13;RPL41;RPL23;ADAM2;EEF1A1;RPS28;FAU;RPL29;AURKAIP1;RPS21;RPS23	GO_Biological_Process_2025	26
All_cells	All_DEGs	Mitochondrial Electron Transport, Cytochrome C to Oxygen (GO:0006123)	'4/13	2.7923e-05	0.00541518	30.6154	321.035	COX7A2;COX6A1;COX6C;COX7C	GO_Biological_Process_2025	4
All_cells	All_DEGs	Ribosomal Small Subunit Biogenesis (GO:0042274)	'8/85	3.24818e-05	0.00541518	7.23331	74.755	RPS14;RPS17;RPS28;RPS16;FAU;RPS27A;RPS13;RPS23	GO_Biological_Process_2025	8
All_cells	All_DEGs	Energy Derivation by Oxidation of Organic Compounds (GO:0015980)	'5/40	0.000268878	0.0345909	9.86216	81.0793	COX4I1;COX7A2;COX6A1;COX6C;COX7C	GO_Biological_Process_2025	5
All_cells	All_DEGs	Aerobic Electron Transport Chain (GO:0019646)	'6/64	0.000326782	0.0345909	7.15833	57.4543	COX4I1;NDUFB4;COX7A2;COX6A1;COX6C;COX7C	GO_Biological_Process_2025	6
All_cells	All_DEGs	Negative Regulation of Inclusion Body Assembly (GO:0090084)	'3/10	0.000335736	0.0345909	29.4221	235.353	DNAJB1;HSPA1B;HSPA1A	GO_Biological_Process_2025	3
All_cells	All_DEGs	Regulation of Inclusion Body Assembly (GO:0090083)	'3/10	0.000335736	0.0345909	29.4221	235.353	DNAJB1;HSPA1B;HSPA1A	GO_Biological_Process_2025	3
All_cells	All_DEGs	Mitochondrial ATP Synthesis Coupled Electron Transport (GO:0042775)	'6/65	0.00035569	0.0345909	7.03664	55.8812	COX4I1;NDUFB4;COX7A2;COX6A1;COX6C;COX7C	GO_Biological_Process_2025	6
All_cells	All_DEGs	Ribosomal Small Subunit Assembly (GO:0000028)	'3/16	0.00146891	0.12337	15.8378	103.314	RPS14;RPS28;FAU	GO_Biological_Process_2025	3
All_cells	All_DEGs	Cellular Respiration (GO:0045333)	'6/85	0.00148001	0.12337	5.24987	34.2066	COX4I1;NDUFB4;COX7A2;COX6A1;COX6C;COX7C	GO_Biological_Process_2025	6
All_cells	All_DEGs	Positive Regulation of Dendrite Morphogenesis (GO:0050775)	'3/17	0.00176465	0.131975	14.7058	93.232	CUX2;RELN;OBSL1	GO_Biological_Process_2025	3
All_cells	All_DEGs	Ribonucleoprotein Complex Biogenesis (GO:0022613)	'7/120	0.00184975	0.131975	4.28966	26.9935	RPS14;RPS17;RPS28;RPS16;RPS27A;RPS13;RPS23	GO_Biological_Process_2025	7
All_cells	All_DEGs	Cellular Heat Acclimation (GO:0070370)	'2/5	0.00203561	0.131975	45.6181	282.693	HSPA1B;HSPA1A	GO_Biological_Process_2025	2
All_cells	All_DEGs	Heat Acclimation (GO:0010286)	'2/5	0.00203561	0.131975	45.6181	282.693	HSPA1B;HSPA1A	GO_Biological_Process_2025	2
All_cells	All_DEGs	Binding of Sperm to Zona Pellucida (GO:0007339)	'3/20	0.00286487	0.175963	12.1088	70.9	ADAM2;LY6K;ZPBP2	GO_Biological_Process_2025	3
All_cells	All_DEGs	Establishment of Protein Localization to Mitochondrion (GO:0072655)	'4/45	0.0040431	0.212772	6.70953	36.9745	TOMM7;ROMO1;AURKAIP1;TOMM5	GO_Biological_Process_2025	4
All_cells	All_DEGs	Regulation of Nucleotide-Binding Oligomerization Domain Containing 2 Signaling Pathway (GO:0070432)	'2/7	0.00419344	0.212772	27.3681	149.819	HSPA1B;HSPA1A	GO_Biological_Process_2025	2
All_cells	All_DEGs	Neurotransmitter-Gated Ion Channel Clustering (GO:0072578)	'2/7	0.00419344	0.212772	27.3681	149.819	RELN;LHFPL3	GO_Biological_Process_2025	2
All_cells	All_DEGs	Positive Regulation of Microtubule Nucleation (GO:0090063)	'2/7	0.00419344	0.212772	27.3681	149.819	HSPA1B;HSPA1A	GO_Biological_Process_2025	2
All_cells	All_DEGs	rRNA Processing (GO:0006364)	'6/110	0.00537278	0.230812	3.9828	20.8157	RPS14;RPL7A;RPS17;RPS28;RPS16;REXO5	GO_Biological_Process_2025	6
All_cells	All_DEGs	Chaperone Cofactor-Dependent Protein Refolding (GO:0051085)	'3/25	0.00547954	0.230812	9.35445	48.7061	DNAJB1;HSPA1B;HSPA1A	GO_Biological_Process_2025	3
All_cells	All_DEGs	Regulation of Interleukin-23 Production (GO:0032667)	'2/8	0.0055379	0.230812	22.8056	118.501	PLCG2;RNASE1	GO_Biological_Process_2025	2
All_cells	All_DEGs	Neuronal Ion Channel Clustering (GO:0045161)	'2/8	0.0055379	0.230812	22.8056	118.501	CNTNAP2;SPTBN4	GO_Biological_Process_2025	2
All_cells	All_DEGs	Phosphatidylethanolamine Biosynthetic Process (GO:0006646)	'2/8	0.0055379	0.230812	22.8056	118.501	ETNK1;CEPT1	GO_Biological_Process_2025	2
All_cells	All_DEGs	rRNA 3'-End Processing (GO:0031125)	'2/9	0.00705229	0.274334	19.5466	96.8419	RPS21;REXO5	GO_Biological_Process_2025	2
All_cells	All_DEGs	Modification-Dependent Macromolecule Catabolic Process (GO:0043632)	'2/9	0.00705229	0.274334	19.5466	96.8419	FAU;RPS27A	GO_Biological_Process_2025	2
All_cells	All_DEGs	Establishment of Protein Localization to Mitochondrial Membrane (GO:0090151)	'3/28	0.00755946	0.282891	8.23066	40.2064	TOMM7;ROMO1;TOMM5	GO_Biological_Process_2025	3
All_cells	All_DEGs	Regulation of Alternative mRNA Splicing, via Spliceosome (GO:0000381)	'4/55	0.00826923	0.282891	5.3912	25.8519	RBFOX1;KHDRBS3;RBFOX3;NOVA1	GO_Biological_Process_2025	4
All_cells	All_DEGs	Cytolysis by Host of Symbiont Cells (GO:0051838)	'2/10	0.00873144	0.282891	17.1024	81.0796	ROMO1;TTF2	GO_Biological_Process_2025	2
All_cells	All_DEGs	Positive Regulation of Cell Morphogenesis (GO:0010770)	'2/10	0.00873144	0.282891	17.1024	81.0796	CUX2;OBSL1	GO_Biological_Process_2025	2
All_cells	All_DEGs	Positive Regulation of Dendritic Spine Morphogenesis (GO:0061003)	'2/10	0.00873144	0.282891	17.1024	81.0796	CUX2;RELN	GO_Biological_Process_2025	2
All_cells	All_DEGs	Positive Regulation of Tumor Necrosis Factor-Mediated Signaling Pathway (GO:1903265)	'2/10	0.00873144	0.282891	17.1024	81.0796	HSPA1B;HSPA1A	GO_Biological_Process_2025	2
All_cells	All_DEGs	Positive Regulation of Microtubule Polymerization (GO:0031116)	'3/30	0.00917157	0.282891	7.62021	35.7513	RNASE1;HSPA1B;HSPA1A	GO_Biological_Process_2025	3
All_cells	All_DEGs	Ribosome Biogenesis (GO:0042254)	'7/161	0.00921155	0.282891	3.14102	14.7229	RPS14;RPS17;RPS28;RPS16;RPS27A;RPS13;RPS23	GO_Biological_Process_2025	7
All_cells	All_DEGs	Sperm-Egg Recognition (GO:0035036)	'3/32	0.0109694	0.318175	7.09396	32.0125	ADAM2;LY6K;ZPBP2	GO_Biological_Process_2025	3
All_cells	All_DEGs	Neuron Migration (GO:0001764)	'4/60	0.0111784	0.318175	4.90859	22.0581	GPM6A;RELN;CELSR1;RNASE1	GO_Biological_Process_2025	4
All_cells	All_DEGs	Protein Targeting to Mitochondrion (GO:0006626)	'4/60	0.0111784	0.318175	4.90859	22.0581	TOMM7;ROMO1;AURKAIP1;TOMM5	GO_Biological_Process_2025	4
All_cells	All_DEGs	Negative Regulation of Amyloid Fibril Formation (GO:1905907)	'2/12	0.0125639	0.349096	13.6806	59.8789	PFDN5;PFDN6	GO_Biological_Process_2025	2
All_cells	All_DEGs	Outer Mitochondrial Membrane Organization (GO:0007008)	'2/13	0.0147073	0.383994	12.4362	52.4736	TOMM7;TOMM5	GO_Biological_Process_2025	2
All_cells	All_DEGs	Protein Insertion Into Mitochondrial Outer Membrane (GO:0045040)	'2/13	0.0147073	0.383994	12.4362	52.4736	TOMM7;TOMM5	GO_Biological_Process_2025	2
All_cells	All_DEGs	'De Novo' Post-Translational Protein Folding (GO:0051084)	'3/36	0.015136	0.383994	6.23282	26.1197	DNAJB1;HSPA1B;HSPA1A	GO_Biological_Process_2025	3
All_cells	All_DEGs	Cellular Response to Heat (GO:0034605)	'3/36	0.015136	0.383994	6.23282	26.1197	DNAJB1;HSPA1B;HSPA1A	GO_Biological_Process_2025	3
All_cells	All_DEGs	Maturation of SSU-rRNA (GO:0030490)	'3/38	0.0175096	0.43476	5.87606	23.7687	RPS14;RPS28;RPS16	GO_Biological_Process_2025	3
All_cells	All_DEGs	Spermatid Development (GO:0007286)	'4/70	0.0187969	0.45064	4.16275	16.543	PIWIL1;SPINK2;DPY19L2;ADAD2	GO_Biological_Process_2025	4
All_cells	All_DEGs	Regulation of Fatty Acid Oxidation (GO:0046320)	'2/15	0.0194252	0.45064	10.5219	41.4688	PDK4;SOX9	GO_Biological_Process_2025	2
All_cells	All_DEGs	Positive Regulation of Alpha-Beta T Cell Proliferation (GO:0046641)	'2/15	0.0194252	0.45064	10.5219	41.4688	CD81;HLA-A	GO_Biological_Process_2025	2
All_cells	All_DEGs	Regulation of Protein Targeting to Mitochondrion (GO:1903214)	'3/40	0.0200788	0.45064	5.55787	21.7206	ATP5IF1;UBL5;TOMM7	GO_Biological_Process_2025	3
All_cells	All_DEGs	Small GTPase-mediated Signal Transduction (GO:0007264)	'7/188	0.0200799	0.45064	2.66878	10.4297	ABR;RASGEF1B;CDH13;KSR2;CELSR1;ARHGAP15;RNASE1	GO_Biological_Process_2025	7
All_cells	All_DEGs	Establishment of Protein Localization to Endoplasmic Reticulum (GO:0072599)	'2/16	0.0219903	0.452432	9.76984	37.293	SEC61G;SRP14	GO_Biological_Process_2025	2
All_cells	All_DEGs	Postsynaptic Membrane Organization (GO:0001941)	'2/16	0.0219903	0.452432	9.76984	37.293	RELN;LHFPL3	GO_Biological_Process_2025	2
All_cells	All_DEGs	Regulation of B Cell Receptor Signaling Pathway (GO:0050855)	'2/16	0.0219903	0.452432	9.76984	37.293	CD81;LPXN	GO_Biological_Process_2025	2
All_cells	All_DEGs	Regulation of Amyloid Fibril Formation (GO:1905906)	'2/16	0.0219903	0.452432	9.76984	37.293	PFDN5;PFDN6	GO_Biological_Process_2025	2
All_cells	All_DEGs	Glycerophospholipid Biosynthetic Process (GO:0046474)	'5/110	0.0220982	0.452432	3.27569	12.4878	DGKB;ETNK1;PLA2G4C;PLCG2;CEPT1	GO_Biological_Process_2025	5
All_cells	All_DEGs	Ribosome Assembly (GO:0042255)	'3/42	0.0228443	0.459643	5.27231	19.9243	RPS14;RPS28;FAU	GO_Biological_Process_2025	3
All_cells	All_DEGs	Mitochondrial Transport (GO:0006839)	'3/43	0.0243007	0.480164	5.14024	19.1076	TOMM7;ROMO1;TOMM5	GO_Biological_Process_2025	3
All_cells	All_DEGs	Killing by Host of Symbiont Cells (GO:0051873)	'2/17	0.0246871	0.480164	9.11806	33.7502	ROMO1;TTF2	GO_Biological_Process_2025	2
All_cells	All_DEGs	Learning (GO:0007612)	'3/44	0.0258062	0.493703	5.01462	18.3391	CNTNAP2;RELN;SHANK2	GO_Biological_Process_2025	3
All_cells	All_DEGs	Rac Protein Signal Transduction (GO:0016601)	'2/18	0.0275111	0.509611	8.54774	30.7134	CDH13;RNASE1	GO_Biological_Process_2025	2
All_cells	All_DEGs	Regulation of Microtubule Nucleation (GO:0010968)	'2/18	0.0275111	0.509611	8.54774	30.7134	HSPA1B;HSPA1A	GO_Biological_Process_2025	2
All_cells	All_DEGs	Proteolysis Involved in Protein Catabolic Process (GO:0051603)	'4/80	0.0290138	0.529049	3.61318	12.7906	SAYSD1;CTSV;FAU;RPS27A	GO_Biological_Process_2025	4
All_cells	All_DEGs	Positive Regulation of Mitophagy (GO:1901526)	'2/19	0.0304582	0.541353	8.04453	28.0867	ATP5IF1;TOMM7	GO_Biological_Process_2025	2
All_cells	All_DEGs	Regulation of Trans-Synaptic Signaling (GO:0099177)	'3/47	0.0306164	0.541353	4.672	16.2876	RELN;CACNA1A;LRRC4C	GO_Biological_Process_2025	3
All_cells	All_DEGs	Response to Fatty Acid (GO:0070542)	'2/20	0.0335241	0.569607	7.59722	25.7963	PDK4;SOX9	GO_Biological_Process_2025	2
All_cells	All_DEGs	Positive Regulation of Reactive Oxygen Species Metabolic Process (GO:2000379)	'3/52	0.0396023	0.569607	4.1942	13.5425	PLCG2;ROMO1;TTF2	GO_Biological_Process_2025	3
All_cells	All_DEGs	Proton Motive Force-Driven Mitochondrial ATP Synthesis (GO:0042776)	'3/52	0.0396023	0.569607	4.1942	13.5425	ATP5PF;NDUFB4;ATP5MF	GO_Biological_Process_2025	3
All_cells	All_DEGs	Regulation of Mitotic Spindle Assembly (GO:1901673)	'2/22	0.0399965	0.569607	6.83681	22.0074	HSPA1B;HSPA1A	GO_Biological_Process_2025	2
All_cells	All_DEGs	Chaperone-Mediated Protein Complex Assembly (GO:0051131)	'2/22	0.0399965	0.569607	6.83681	22.0074	PFDN6;HSPA1A	GO_Biological_Process_2025	2
All_cells	All_DEGs	Regulation of Proteolysis (GO:0030162)	'3/53	0.0415427	0.569607	4.1101	13.0744	CST3;TTF2;AURKAIP1	GO_Biological_Process_2025	3
All_cells	All_DEGs	Unsaturated Fatty Acid Metabolic Process (GO:0033559)	'3/53	0.0415427	0.569607	4.1101	13.0744	GPX4;PLA2G4C;GSTA1	GO_Biological_Process_2025	3
All_cells	All_DEGs	Positive Regulation of Small GTPase Mediated Signal Transduction (GO:0051057)	'3/53	0.0415427	0.569607	4.1101	13.0744	COL3A1;RELN;RNASE1	GO_Biological_Process_2025	3
All_cells	All_DEGs	Mitochondrial Respiratory Chain Complex Assembly (GO:0033108)	'4/90	0.0419718	0.569607	3.19141	10.1192	COX17;NDUFAF3;COX7A2;COX20	GO_Biological_Process_2025	4
All_cells	All_DEGs	Negative Regulation of Hippo Signaling (GO:0035331)	'2/23	0.0433952	0.569607	6.51091	20.4274	WWC1;SHANK2	GO_Biological_Process_2025	2
All_cells	All_DEGs	Positive Regulation of T Cell Cytokine Production (GO:0002726)	'2/23	0.0433952	0.569607	6.51091	20.4274	CD81;HLA-A	GO_Biological_Process_2025	2
All_cells	All_DEGs	Positive Regulation of Dendritic Spine Development (GO:0060999)	'2/23	0.0433952	0.569607	6.51091	20.4274	CUX2;RELN	GO_Biological_Process_2025	2
All_cells	All_DEGs	Positive Regulation of Excitatory Postsynaptic Potential (GO:2000463)	'2/23	0.0433952	0.569607	6.51091	20.4274	CUX2;RELN	GO_Biological_Process_2025	2
All_cells	All_DEGs	Prostanoid Metabolic Process (GO:0006692)	'2/23	0.0433952	0.569607	6.51091	20.4274	GSTA1;PTGDS	GO_Biological_Process_2025	2
All_cells	All_DEGs	Protein Targeting to ER (GO:0045047)	'2/23	0.0433952	0.569607	6.51091	20.4274	SEC61G;SRP14	GO_Biological_Process_2025	2
All_cells	All_DEGs	Sensory Perception of Mechanical Stimulus (GO:0050954)	'4/92	0.0448975	0.569607	3.11856	9.67807	SPTBN4;PIEZO2;MYH14;LHFPL3	GO_Biological_Process_2025	4
All_cells	All_DEGs	ATP Biosynthetic Process (GO:0006754)	'2/24	0.0468972	0.569607	6.21465	19.0156	ATP5PF;ATP5MF	GO_Biological_Process_2025	2
All_cells	All_DEGs	Negative Regulation of Extrinsic Apoptotic Signaling Pathway in Absence of Ligand (GO:2001240)	'2/24	0.0468972	0.569607	6.21465	19.0156	HSPA1B;HSPA1A	GO_Biological_Process_2025	2
All_cells	All_DEGs	Negative Regulation of Receptor-Mediated Endocytosis (GO:0048261)	'2/24	0.0468972	0.569607	6.21465	19.0156	NEU3;RNASE1	GO_Biological_Process_2025	2
All_cells	All_DEGs	Negative Regulation of Signal Transduction in Absence of Ligand (GO:1901099)	'2/24	0.0468972	0.569607	6.21465	19.0156	HSPA1B;HSPA1A	GO_Biological_Process_2025	2
All_cells	All_DEGs	Cellular Response to Steroid Hormone Stimulus (GO:0071383)	'2/24	0.0468972	0.569607	6.21465	19.0156	HSPA1B;HSPA1A	GO_Biological_Process_2025	2
All_cells	All_DEGs	Mitochondrial Cytochrome C Oxidase Assembly (GO:0033617)	'2/24	0.0468972	0.569607	6.21465	19.0156	COX17;COX20	GO_Biological_Process_2025	2
All_cells	All_DEGs	Protein Targeting (GO:0006605)	'5/136	0.048262	0.569607	2.62207	7.94779	SEC61G;TOMM7;SRP14;AURKAIP1;TOMM5	GO_Biological_Process_2025	5
All_cells	All_DEGs	Phosphatidylethanolamine Metabolic Process (GO:0046337)	'2/25	0.0504987	0.569607	5.94414	17.7481	ETNK1;CEPT1	GO_Biological_Process_2025	2
All_cells	All_DEGs	Cellular Response to Low-Density Lipoprotein Particle Stimulus (GO:0071404)	'2/25	0.0504987	0.569607	5.94414	17.7481	CD81;CDH13	GO_Biological_Process_2025	2
All_cells	All_DEGs	Lamellipodium Assembly (GO:0030032)	'2/25	0.0504987	0.569607	5.94414	17.7481	CDH13;RNASE1	GO_Biological_Process_2025	2
All_cells	All_DEGs	Purine Ribonucleotide Metabolic Process (GO:0009150)	'3/58	0.0519443	0.569607	3.73551	11.0481	HINT1;HSPA1B;HSPA1A	GO_Biological_Process_2025	3
All_cells	All_DEGs	Regulation of mRNA Splicing, via Spliceosome (GO:0048024)	'4/97	0.0526984	0.569607	2.95015	8.68278	RBFOX1;KHDRBS3;RBFOX3;NOVA1	GO_Biological_Process_2025	4
All_cells	All_DEGs	Proton Motive Force-Driven ATP Synthesis (GO:0015986)	'3/59	0.0541618	0.569607	3.66862	10.6969	ATP5PF;NDUFB4;ATP5MF	GO_Biological_Process_2025	3
All_cells	All_DEGs	Positive Regulation of Rho Protein Signal Transduction (GO:0035025)	'2/26	0.0541963	0.569607	5.69618	16.6052	COL3A1;RNASE1	GO_Biological_Process_2025	2
All_cells	All_DEGs	Regulation of Cell Size (GO:0008361)	'2/26	0.0541963	0.569607	5.69618	16.6052	RAP1GAP2;RNASE1	GO_Biological_Process_2025	2
All_cells	All_DEGs	Cellular Response to Transforming Growth Factor Beta Stimulus (GO:0071560)	'4/98	0.0543416	0.569607	2.91861	8.50036	COL3A1;PDCD5;LPXN;SOX9	GO_Biological_Process_2025	4
All_cells	All_DEGs	Defense Response to Gram-positive Bacterium (GO:0050830)	'4/98	0.0543416	0.569607	2.91861	8.50036	ROMO1;HLA-A;FAU;RNASE1	GO_Biological_Process_2025	4
All_cells	All_DEGs	Oxidative Phosphorylation (GO:0006119)	'3/60	0.0564241	0.569607	3.60407	10.3612	ATP5PF;NDUFB4;ATP5MF	GO_Biological_Process_2025	3
All_cells	All_DEGs	Wnt Signaling Pathway, Planar Cell Polarity Pathway (GO:0060071)	'2/27	0.0579862	0.569607	5.46806	15.5706	CELSR1;RNASE1	GO_Biological_Process_2025	2
All_cells	All_DEGs	Respiratory Chain Complex IV Assembly (GO:0008535)	'2/27	0.0579862	0.569607	5.46806	15.5706	COX17;COX20	GO_Biological_Process_2025	2
All_cells	All_DEGs	Positive Regulation of Erythrocyte Differentiation (GO:0045648)	'2/27	0.0579862	0.569607	5.46806	15.5706	HSPA1B;HSPA1A	GO_Biological_Process_2025	2
All_cells	All_DEGs	Maturation of SSU-rRNA Frm Tricistronic rRNA Trnscpt (GO:0000462)	'2/27	0.0579862	0.569607	5.46806	15.5706	RPS16;RPS21	GO_Biological_Process_2025	2
All_cells	All_DEGs	Regulation of Reactive Oxygen Species Metabolic Process (GO:2000377)	'3/61	0.0587307	0.569607	3.54175	10.0401	ROMO1;TTF2;RNASE1	GO_Biological_Process_2025	3
All_cells	All_DEGs	Regulation of Extrinsic Apoptotic Signaling Pathway in Absence of Ligand (GO:2001239)	'2/28	0.0618652	0.569607	5.25748	14.6305	HSPA1B;HSPA1A	GO_Biological_Process_2025	2
All_cells	All_DEGs	Regulation of Protein Modification by Small Protein Conjugation or Removal (GO:1903320)	'2/28	0.0618652	0.569607	5.25748	14.6305	HSPA1B;HSPA1A	GO_Biological_Process_2025	2
All_cells	All_DEGs	Cellular Response to Epidermal Growth Factor Stimulus (GO:0071364)	'2/28	0.0618652	0.569607	5.25748	14.6305	EEF1A1;SOX9	GO_Biological_Process_2025	2
All_cells	All_DEGs	Glial Cell Differentiation (GO:0010001)	'2/28	0.0618652	0.569607	5.25748	14.6305	RELN;SOX9	GO_Biological_Process_2025	2
All_cells	All_DEGs	Regulation of RNA Splicing (GO:0043484)	'4/104	0.0647761	0.569607	2.74266	7.50615	ENY2;TAF9;RPS13;HSPA1A	GO_Biological_Process_2025	4
All_cells	All_DEGs	Regulation of Dendrite Morphogenesis (GO:0048814)	'2/29	0.0658299	0.569607	5.0625	13.7735	CUX2;OBSL1	GO_Biological_Process_2025	2
All_cells	All_DEGs	Positive Regulation of Protein Targeting to Mitochondrion (GO:1903955)	'2/29	0.0658299	0.569607	5.0625	13.7735	UBL5;TOMM7	GO_Biological_Process_2025	2
All_cells	All_DEGs	Positive Regulation of Cell Junction Assembly (GO:1901890)	'3/65	0.0683909	0.569607	3.31258	8.88604	CNTNAP2;CUX2;RNASE1	GO_Biological_Process_2025	3
All_cells	All_DEGs	Positive Regulation of Calcium-Mediated Signaling (GO:0050850)	'2/30	0.0698769	0.569607	4.88145	12.9896	PLCG2;CDH13	GO_Biological_Process_2025	2
All_cells	All_DEGs	Lamellipodium Organization (GO:0097581)	'2/30	0.0698769	0.569607	4.88145	12.9896	CDH13;RNASE1	GO_Biological_Process_2025	2
All_cells	All_DEGs	Prostaglandin Metabolic Process (GO:0006693)	'2/30	0.0698769	0.569607	4.88145	12.9896	GSTA1;PTGDS	GO_Biological_Process_2025	2
All_cells	All_DEGs	Regulation of Circadian Sleep/Wake Cycle (GO:0042749)	'1/5	0.0704343	0.569607	17.0467	45.2262	PTGDS	GO_Biological_Process_2025	1
All_cells	All_DEGs	Regulation of Circadian Sleep/Wake Cycle, Sleep (GO:0045187)	'1/5	0.0704343	0.569607	17.0467	45.2262	PTGDS	GO_Biological_Process_2025	1
All_cells	All_DEGs	Negative Regulation of Fibroblast Migration (GO:0010764)	'1/5	0.0704343	0.569607	17.0467	45.2262	RNASE1	GO_Biological_Process_2025	1
All_cells	All_DEGs	MHC Class I Protein Complex Assembly (GO:0002397)	'1/5	0.0704343	0.569607	17.0467	45.2262	HLA-A	GO_Biological_Process_2025	1
All_cells	All_DEGs	Negative Regulation of Neuron Migration (GO:2001223)	'1/5	0.0704343	0.569607	17.0467	45.2262	COL3A1	GO_Biological_Process_2025	1
All_cells	All_DEGs	Adenosine to Inosine Editing (GO:0006382)	'1/5	0.0704343	0.569607	17.0467	45.2262	ADAD2	GO_Biological_Process_2025	1
All_cells	All_DEGs	Regulation of Phospholipase C-activating G Protein-Coupled Receptor Signaling Pathway (GO:1900736)	'1/5	0.0704343	0.569607	17.0467	45.2262	TTF2	GO_Biological_Process_2025	1
All_cells	All_DEGs	Peptide Antigen Assembly With MHC Class I Protein Complex (GO:0002502)	'1/5	0.0704343	0.569607	17.0467	45.2262	HLA-A	GO_Biological_Process_2025	1
All_cells	All_DEGs	Cerebral Cortex Cell Migration (GO:0021795)	'1/5	0.0704343	0.569607	17.0467	45.2262	RELN	GO_Biological_Process_2025	1
All_cells	All_DEGs	Chondrocyte Development (GO:0002063)	'1/5	0.0704343	0.569607	17.0467	45.2262	SOX9	GO_Biological_Process_2025	1
All_cells	All_DEGs	Ruffle Assembly (GO:0097178)	'1/5	0.0704343	0.569607	17.0467	45.2262	RNASE1	GO_Biological_Process_2025	1
All_cells	All_DEGs	Embryonic Brain Development (GO:1990403)	'1/5	0.0704343	0.569607	17.0467	45.2262	RPL15	GO_Biological_Process_2025	1
All_cells	All_DEGs	Positive Regulation of Gap Junction Assembly (GO:1903598)	'1/5	0.0704343	0.569607	17.0467	45.2262	CNTNAP2	GO_Biological_Process_2025	1
All_cells	All_DEGs	Positive Regulation of Gonad Development (GO:1905941)	'1/5	0.0704343	0.569607	17.0467	45.2262	SOX9	GO_Biological_Process_2025	1
All_cells	All_DEGs	Epithelial Tube Branching Involved in Lung Morphogenesis (GO:0060441)	'1/5	0.0704343	0.569607	17.0467	45.2262	CELSR1	GO_Biological_Process_2025	1
All_cells	All_DEGs	Thrombin-Activated Receptor Signaling Pathway (GO:0070493)	'1/5	0.0704343	0.569607	17.0467	45.2262	TTF2	GO_Biological_Process_2025	1
All_cells	All_DEGs	Positive Regulation of Kidney Development (GO:0090184)	'1/5	0.0704343	0.569607	17.0467	45.2262	SOX9	GO_Biological_Process_2025	1
All_cells	All_DEGs	Positive Regulation of Male Gonad Development (GO:2000020)	'1/5	0.0704343	0.569607	17.0467	45.2262	SOX9	GO_Biological_Process_2025	1
All_cells	All_DEGs	+ Reg of Nucleotide-Binding Domain, Leucine Rich Repeat Containing Receptor Sgnlng Pway (GO:0070426)	'1/5	0.0704343	0.569607	17.0467	45.2262	HSPA1B	GO_Biological_Process_2025	1
All_cells	All_DEGs	Postsynaptic Density Protein 95 Clustering (GO:0097119)	'1/5	0.0704343	0.569607	17.0467	45.2262	RELN	GO_Biological_Process_2025	1
All_cells	All_DEGs	Medium-Chain Fatty Acid Biosynthetic Process (GO:0051792)	'1/5	0.0704343	0.569607	17.0467	45.2262	OXSM	GO_Biological_Process_2025	1
All_cells	All_DEGs	Regulation of acyl-CoA Biosynthetic Process (GO:0050812)	'1/5	0.0704343	0.569607	17.0467	45.2262	PDK4	GO_Biological_Process_2025	1
All_cells	All_DEGs	Regulation of Blood Vessel Remodeling (GO:0060312)	'1/5	0.0704343	0.569607	17.0467	45.2262	CST3	GO_Biological_Process_2025	1
All_cells	All_DEGs	Negative Regulation of Astrocyte Differentiation (GO:0048712)	'1/5	0.0704343	0.569607	17.0467	45.2262	TTF2	GO_Biological_Process_2025	1
All_cells	All_DEGs	Axon Guidance (GO:0007411)	'5/152	0.0707607	0.569607	2.33477	6.18351	PLEKHG4;RELN;CNTN5;UNC5D;RNASE1	GO_Biological_Process_2025	5
All_cells	All_DEGs	Regulation of Dendritic Spine Morphogenesis (GO:0061001)	'2/31	0.0740031	0.569607	4.71288	12.2707	CUX2;RELN	GO_Biological_Process_2025	2
All_cells	All_DEGs	Regulation of Neuron Migration (GO:2001222)	'2/31	0.0740031	0.569607	4.71288	12.2707	COL3A1;RELN	GO_Biological_Process_2025	2
All_cells	All_DEGs	Antigen Processing and Presentation of Exogenous Peptide Antigen (GO:0002478)	'2/31	0.0740031	0.569607	4.71288	12.2707	CTSV;HLA-A	GO_Biological_Process_2025	2
All_cells	All_DEGs	Regulation of Spindle Assembly (GO:0090169)	'2/31	0.0740031	0.569607	4.71288	12.2707	HSPA1B;HSPA1A	GO_Biological_Process_2025	2
All_cells	All_DEGs	Response to Epidermal Growth Factor (GO:0070849)	'2/31	0.0740031	0.569607	4.71288	12.2707	EEF1A1;SOX9	GO_Biological_Process_2025	2
All_cells	All_DEGs	Modulation of Excitatory Postsynaptic Potential (GO:0098815)	'2/31	0.0740031	0.569607	4.71288	12.2707	CUX2;RELN	GO_Biological_Process_2025	2
All_cells	All_DEGs	Response to Steroid Hormone (GO:0048545)	'2/32	0.0782054	0.569607	4.55556	11.6095	HSPA1B;HSPA1A	GO_Biological_Process_2025	2
All_cells	All_DEGs	Positive Regulation of Establishment of Protein Localization to Mitochondrion (GO:1903749)	'2/32	0.0782054	0.569607	4.55556	11.6095	UBL5;TOMM7	GO_Biological_Process_2025	2
All_cells	All_DEGs	Purine Ribonucleoside Triphosphate Metabolic Process (GO:0009205)	'2/32	0.0782054	0.569607	4.55556	11.6095	HSPA1B;HSPA1A	GO_Biological_Process_2025	2
All_cells	All_DEGs	Negative Regulation of Heart Rate (GO:0010459)	'1/6	0.0839164	0.569607	13.6367	33.7908	SPTBN4	GO_Biological_Process_2025	1
All_cells	All_DEGs	Regulation of Male Gonad Development (GO:2000018)	'1/6	0.0839164	0.569607	13.6367	33.7908	SOX9	GO_Biological_Process_2025	1
All_cells	All_DEGs	Antigen Processing and Presentation of Endogenous Peptide Antigen via MHC Class I (GO:0019885)	'1/6	0.0839164	0.569607	13.6367	33.7908	HLA-A	GO_Biological_Process_2025	1
All_cells	All_DEGs	Cellular Response to Caffeine (GO:0071313)	'1/6	0.0839164	0.569607	13.6367	33.7908	RYR1	GO_Biological_Process_2025	1
All_cells	All_DEGs	Release of Sequestered Calcium Ion Into Cytosol by Sarcoplasmic Reticulum (GO:0014808)	'1/6	0.0839164	0.569607	13.6367	33.7908	RYR1	GO_Biological_Process_2025	1
All_cells	All_DEGs	Response to Alkaloid (GO:0043279)	'1/6	0.0839164	0.569607	13.6367	33.7908	RYR1	GO_Biological_Process_2025	1
All_cells	All_DEGs	Response to Caffeine (GO:0031000)	'1/6	0.0839164	0.569607	13.6367	33.7908	RYR1	GO_Biological_Process_2025	1
All_cells	All_DEGs	Short-Chain Fatty Acid Metabolic Process (GO:0046459)	'1/6	0.0839164	0.569607	13.6367	33.7908	OXSM	GO_Biological_Process_2025	1
All_cells	All_DEGs	Positive Regulation of Centriole Elongation (GO:1903724)	'1/6	0.0839164	0.569607	13.6367	33.7908	PPP1R35	GO_Biological_Process_2025	1
All_cells	All_DEGs	Epithelial Tube Formation (GO:0072175)	'1/6	0.0839164	0.569607	13.6367	33.7908	SOX9	GO_Biological_Process_2025	1
All_cells	All_DEGs	Positive Regulation of Interleukin-23 Production (GO:0032747)	'1/6	0.0839164	0.569607	13.6367	33.7908	PLCG2	GO_Biological_Process_2025	1
All_cells	All_DEGs	Positive Regulation of Protein Catabolic Process in the Vacuole (GO:1904352)	'1/6	0.0839164	0.569607	13.6367	33.7908	CD81	GO_Biological_Process_2025	1
All_cells	All_DEGs	Hepatocyte Growth Factor Receptor Signaling Pathway (GO:0048012)	'1/6	0.0839164	0.569607	13.6367	33.7908	RNASE1	GO_Biological_Process_2025	1
All_cells	All_DEGs	Humoral Immune Response Mediated by Circulating Immunoglobulin (GO:0002455)	'1/6	0.0839164	0.569607	13.6367	33.7908	CD81	GO_Biological_Process_2025	1
All_cells	All_DEGs	Positive Regulation of Type 2 Mitophagy (GO:1905091)	'1/6	0.0839164	0.569607	13.6367	33.7908	TOMM7	GO_Biological_Process_2025	1
All_cells	All_DEGs	Post-Translational Protein Targeting to Membrane, Translocation (GO:0031204)	'1/6	0.0839164	0.569607	13.6367	33.7908	SEC61G	GO_Biological_Process_2025	1
All_cells	All_DEGs	Postsynaptic Density Assembly (GO:0097107)	'1/6	0.0839164	0.569607	13.6367	33.7908	RELN	GO_Biological_Process_2025	1
All_cells	All_DEGs	Long-Term Synaptic Depression (GO:0060292)	'1/6	0.0839164	0.569607	13.6367	33.7908	SHANK2	GO_Biological_Process_2025	1
All_cells	All_DEGs	Regulation of acetyl-CoA Biosynthetic Process From Pyruvate (GO:0010510)	'1/6	0.0839164	0.569607	13.6367	33.7908	PDK4	GO_Biological_Process_2025	1
All_cells	All_DEGs	Response to Transforming Growth Factor Beta (GO:0071559)	'2/35	0.0912382	0.569607	4.14078	9.9142	PDCD5;SOX9	GO_Biological_Process_2025	2
All_cells	All_DEGs	Positive Regulation of Cytokine Production Involved in Immune Response (GO:0002720)	'2/35	0.0912382	0.569607	4.14078	9.9142	PLCG2;HLA-A	GO_Biological_Process_2025	2
All_cells	All_DEGs	Substrate Adhesion-Dependent Cell Spreading (GO:0034446)	'2/35	0.0912382	0.569607	4.14078	9.9142	LPXN;RNASE1	GO_Biological_Process_2025	2
All_cells	All_DEGs	Calcium Ion Transmembrane Import Into Cytosol (GO:0097553)	'3/74	0.0925225	0.569607	2.89135	6.88229	RYR1;PLCG2;CACNA1A	GO_Biological_Process_2025	3
All_cells	All_DEGs	Regulation of Cytosolic Calcium Ion Concentration (GO:0051480)	'2/36	0.0957148	0.569607	4.01879	9.42962	RYR1;TTF2	GO_Biological_Process_2025	2
All_cells	All_DEGs	Negative Regulation of Hydrolase Activity (GO:0051346)	'2/36	0.0957148	0.569607	4.01879	9.42962	ATP5IF1;CST3	GO_Biological_Process_2025	2
All_cells	All_DEGs	Positive Regulation of Epithelial Cell Migration (GO:0010634)	'2/36	0.0957148	0.569607	4.01879	9.42962	PLCG2;SOX9	GO_Biological_Process_2025	2
All_cells	All_DEGs	Negative Regulation of Fatty Acid Oxidation (GO:0046322)	'1/7	0.0972036	0.569607	11.3633	26.4873	SOX9	GO_Biological_Process_2025	1
All_cells	All_DEGs	Notch Receptor Processing (GO:0007220)	'1/7	0.0972036	0.569607	11.3633	26.4873	APH1B	GO_Biological_Process_2025	1
All_cells	All_DEGs	Antigen Processing and Presentation of Exogenous Peptide Antigen via MHC Class I (GO:0042590)	'1/7	0.0972036	0.569607	11.3633	26.4873	HLA-A	GO_Biological_Process_2025	1
All_cells	All_DEGs	Regulation of Organ Growth (GO:0046620)	'1/7	0.0972036	0.569607	11.3633	26.4873	WWC1	GO_Biological_Process_2025	1
All_cells	All_DEGs	Regulation of Positive Chemotaxis (GO:0050926)	'1/7	0.0972036	0.569607	11.3633	26.4873	CDH13	GO_Biological_Process_2025	1
All_cells	All_DEGs	Oligosaccharide Catabolic Process (GO:0009313)	'1/7	0.0972036	0.569607	11.3633	26.4873	NEU3	GO_Biological_Process_2025	1
All_cells	All_DEGs	Regulation of Type 2 Mitophagy (GO:1905089)	'1/7	0.0972036	0.569607	11.3633	26.4873	TOMM7	GO_Biological_Process_2025	1
All_cells	All_DEGs	Platelet Activating Factor Metabolic Process (GO:0046469)	'1/7	0.0972036	0.569607	11.3633	26.4873	PLA2G4C	GO_Biological_Process_2025	1
All_cells	All_DEGs	Positive Regulation of CD8-positive, Alpha-Beta T Cell Activation (GO:2001187)	'1/7	0.0972036	0.569607	11.3633	26.4873	HLA-A	GO_Biological_Process_2025	1
All_cells	All_DEGs	Positive Regulation of Bicellular Tight Junction Assembly (GO:1903348)	'1/7	0.0972036	0.569607	11.3633	26.4873	RNASE1	GO_Biological_Process_2025	1
All_cells	All_DEGs	Positive Regulation of Dendritic Cell Cytokine Production (GO:0002732)	'1/7	0.0972036	0.569607	11.3633	26.4873	PLCG2	GO_Biological_Process_2025	1
All_cells	All_DEGs	Endonuc Clvg in ITS1 to Sep SSU-rRNA Fm 5.8S rRNA and LSU-rRNA Fm Tricist rRNA Trnscpt (GO:0000447)	'1/7	0.0972036	0.569607	11.3633	26.4873	RPS21	GO_Biological_Process_2025	1
All_cells	All_DEGs	Establishment of Planar Polarity (GO:0001736)	'1/7	0.0972036	0.569607	11.3633	26.4873	CELSR1	GO_Biological_Process_2025	1
All_cells	All_DEGs	Ganglioside Catabolic Process (GO:0006689)	'1/7	0.0972036	0.569607	11.3633	26.4873	NEU3	GO_Biological_Process_2025	1
All_cells	All_DEGs	Immunological Synapse Formation (GO:0001771)	'1/7	0.0972036	0.569607	11.3633	26.4873	CD81	GO_Biological_Process_2025	1
All_cells	All_DEGs	Positive Regulation of Synapse Maturation (GO:0090129)	'1/7	0.0972036	0.569607	11.3633	26.4873	RELN	GO_Biological_Process_2025	1
All_cells	All_DEGs	Purine Nucleotide Catabolic Process (GO:0006195)	'1/7	0.0972036	0.569607	11.3633	26.4873	HINT1	GO_Biological_Process_2025	1
All_cells	All_DEGs	Negative Regulation of B Cell Receptor Signaling Pathway (GO:0050859)	'1/7	0.0972036	0.569607	11.3633	26.4873	LPXN	GO_Biological_Process_2025	1
All_cells	All_DEGs	Regulation of Chaperone-Mediated Autophagy (GO:1904714)	'1/7	0.0972036	0.569607	11.3633	26.4873	EEF1A1	GO_Biological_Process_2025	1
All_cells	All_DEGs	Positive Regulation of Myeloid Cell Differentiation (GO:0045639)	'2/37	0.100253	0.569607	3.90377	8.9789	HSPA1B;HSPA1A	GO_Biological_Process_2025	2
All_cells	All_DEGs	Regulation of Erythrocyte Differentiation (GO:0045646)	'2/38	0.10485	0.569607	3.79514	8.5589	HSPA1B;HSPA1A	GO_Biological_Process_2025	2
All_cells	All_DEGs	Negative Regulation of Cellular Component Organization (GO:0051129)	'3/80	0.110292	0.569607	2.66523	5.87585	DNAJB1;HSPA1B;HSPA1A	GO_Biological_Process_2025	3
All_cells	All_DEGs	Negative Regulation of Ferroptosis (GO:0110076)	'1/8	0.110299	0.569607	9.7395	21.4713	GPX4	GO_Biological_Process_2025	1
All_cells	All_DEGs	Negative Regulation of Glial Cell Differentiation (GO:0045686)	'1/8	0.110299	0.569607	9.7395	21.4713	TTF2	GO_Biological_Process_2025	1
All_cells	All_DEGs	Regulation of Gap Junction Assembly (GO:1903596)	'1/8	0.110299	0.569607	9.7395	21.4713	CNTNAP2	GO_Biological_Process_2025	1
All_cells	All_DEGs	T Cell Mediated Cytotoxicity (GO:0001913)	'1/8	0.110299	0.569607	9.7395	21.4713	HLA-A	GO_Biological_Process_2025	1
All_cells	All_DEGs	Negative Regulation of Ubiquitin Protein Ligase Activity (GO:1904667)	'1/8	0.110299	0.569607	9.7395	21.4713	RPL23	GO_Biological_Process_2025	1
All_cells	All_DEGs	Box C/D snoRNP Assembly (GO:0000492)	'1/8	0.110299	0.569607	9.7395	21.4713	TAF9	GO_Biological_Process_2025	1
All_cells	All_DEGs	Nucleic Acid Transport (GO:0050657)	'1/8	0.110299	0.569607	9.7395	21.4713	RBFOX1	GO_Biological_Process_2025	1
All_cells	All_DEGs	Release of Sequestered Calcium Ion Into Cytosol by Endoplasmic Reticulum (GO:1903514)	'1/8	0.110299	0.569607	9.7395	21.4713	RYR1	GO_Biological_Process_2025	1
All_cells	All_DEGs	Cellular Response to Purine-Containing Compound (GO:0071415)	'1/8	0.110299	0.569607	9.7395	21.4713	RYR1	GO_Biological_Process_2025	1
All_cells	All_DEGs	Positive Regulation of Adaptive Immune Response (GO:0002821)	'1/8	0.110299	0.569607	9.7395	21.4713	CD81	GO_Biological_Process_2025	1
All_cells	All_DEGs	Cobalamin Metabolic Process (GO:0009235)	'1/8	0.110299	0.569607	9.7395	21.4713	MMADHC	GO_Biological_Process_2025	1
All_cells	All_DEGs	Sphingosine-1-Phosphate Receptor Signaling Pathway (GO:0003376)	'1/8	0.110299	0.569607	9.7395	21.4713	RNASE1	GO_Biological_Process_2025	1
All_cells	All_DEGs	Establishment of Protein Localization to Chromatin (GO:0071169)	'1/8	0.110299	0.569607	9.7395	21.4713	LRWD1	GO_Biological_Process_2025	1
All_cells	All_DEGs	Transcription-Coupled Nucleotide-Excision Repair (GO:0006283)	'1/8	0.110299	0.569607	9.7395	21.4713	POLR2I	GO_Biological_Process_2025	1
All_cells	All_DEGs	Positive Regulation of Membrane Invagination (GO:1905155)	'1/8	0.110299	0.569607	9.7395	21.4713	PLCG2	GO_Biological_Process_2025	1
All_cells	All_DEGs	Postsynaptic Density Organization (GO:0097106)	'1/8	0.110299	0.569607	9.7395	21.4713	RELN	GO_Biological_Process_2025	1
All_cells	All_DEGs	Lipid Phosphorylation (GO:0046834)	'1/8	0.110299	0.569607	9.7395	21.4713	DGKB	GO_Biological_Process_2025	1
All_cells	All_DEGs	Maintenance of Synapse Structure (GO:0099558)	'1/8	0.110299	0.569607	9.7395	21.4713	ERC2	GO_Biological_Process_2025	1
All_cells	All_DEGs	protein-DNA Complex Organization (GO:0071824)	'1/8	0.110299	0.569607	9.7395	21.4713	RPL23	GO_Biological_Process_2025	1
All_cells	All_DEGs	Reelin-Mediated Signaling Pathway (GO:0038026)	'1/8	0.110299	0.569607	9.7395	21.4713	RELN	GO_Biological_Process_2025	1
All_cells	All_DEGs	Regulation of CD4-positive, Alpha-Beta T Cell Proliferation (GO:2000561)	'1/8	0.110299	0.569607	9.7395	21.4713	CD81	GO_Biological_Process_2025	1
All_cells	All_DEGs	Regulation of Centriole Elongation (GO:1903722)	'1/8	0.110299	0.569607	9.7395	21.4713	PPP1R35	GO_Biological_Process_2025	1
All_cells	All_DEGs	Negative Regulation of Proteolysis (GO:0045861)	'2/40	0.114209	0.569607	3.59503	7.80022	CST3;TTF2	GO_Biological_Process_2025	2
All_cells	All_DEGs	Negative Regulation of Sequestering of Calcium Ion (GO:0051283)	'2/40	0.114209	0.569607	3.59503	7.80022	RYR1;PLCG2	GO_Biological_Process_2025	2
All_cells	All_DEGs	Regulation of Hippo Signaling (GO:0035330)	'2/41	0.118967	0.569607	3.50267	7.45687	WWC1;SHANK2	GO_Biological_Process_2025	2
All_cells	All_DEGs	Regulation of Mitotic Spindle Organization (GO:0060236)	'2/41	0.118967	0.569607	3.50267	7.45687	HSPA1B;HSPA1A	GO_Biological_Process_2025	2
All_cells	All_DEGs	Monoatomic Cation Transport (GO:0006812)	'2/41	0.118967	0.569607	3.50267	7.45687	PIEZO2;ROMO1	GO_Biological_Process_2025	2
All_cells	All_DEGs	Negative Regulation of Cytoplasmic Translation (GO:2000766)	'1/9	0.123204	0.569607	8.52163	17.8435	CPEB2	GO_Biological_Process_2025	1
All_cells	All_DEGs	Golgi Lumen Acidification (GO:0061795)	'1/9	0.123204	0.569607	8.52163	17.8435	RNASEK	GO_Biological_Process_2025	1
All_cells	All_DEGs	Amyloid-Beta Formation (GO:0034205)	'1/9	0.123204	0.569607	8.52163	17.8435	APH1B	GO_Biological_Process_2025	1
All_cells	All_DEGs	Regulation of Nitric Oxide Metabolic Process (GO:0080164)	'1/9	0.123204	0.569607	8.52163	17.8435	RNASE1	GO_Biological_Process_2025	1
All_cells	All_DEGs	Apical Protein Localization (GO:0045176)	'1/9	0.123204	0.569607	8.52163	17.8435	CELSR1	GO_Biological_Process_2025	1
All_cells	All_DEGs	Regulation of Protein Exit From Endoplasmic Reticulum (GO:0070861)	'1/9	0.123204	0.569607	8.52163	17.8435	CD81	GO_Biological_Process_2025	1
All_cells	All_DEGs	Regulation of Respiratory Burst (GO:0060263)	'1/9	0.123204	0.569607	8.52163	17.8435	RNASE1	GO_Biological_Process_2025	1
All_cells	All_DEGs	Central Nervous System Neuron Axonogenesis (GO:0021955)	'1/9	0.123204	0.569607	8.52163	17.8435	SPTBN4	GO_Biological_Process_2025	1
All_cells	All_DEGs	Retinal Rod Cell Differentiation (GO:0060221)	'1/9	0.123204	0.569607	8.52163	17.8435	SOX9	GO_Biological_Process_2025	1
All_cells	All_DEGs	Endoplasmic Reticulum Mannose Trimming (GO:1904380)	'1/9	0.123204	0.569607	8.52163	17.8435	RNF103	GO_Biological_Process_2025	1
All_cells	All_DEGs	Synaptic Vesicle Docking (GO:0016081)	'1/9	0.123204	0.569607	8.52163	17.8435	UNC13C	GO_Biological_Process_2025	1
All_cells	All_DEGs	Positive Regulation of Macrophage Cytokine Production (GO:0060907)	'1/9	0.123204	0.569607	8.52163	17.8435	PLCG2	GO_Biological_Process_2025	1
All_cells	All_DEGs	Positive Regulation of Mesenchymal Cell Proliferation (GO:0002053)	'1/9	0.123204	0.569607	8.52163	17.8435	SOX9	GO_Biological_Process_2025	1
All_cells	All_DEGs	Urogenital System Development (GO:0001655)	'1/9	0.123204	0.569607	8.52163	17.8435	SOX9	GO_Biological_Process_2025	1
All_cells	All_DEGs	Positive Regulation of Phagocytosis, Engulfment (GO:0060100)	'1/9	0.123204	0.569607	8.52163	17.8435	PLCG2	GO_Biological_Process_2025	1
All_cells	All_DEGs	Positive Regulation of Protein Exit From Endoplasmic Reticulum (GO:0070863)	'1/9	0.123204	0.569607	8.52163	17.8435	CD81	GO_Biological_Process_2025	1
All_cells	All_DEGs	Lipoxygenase Pathway (GO:0019372)	'1/9	0.123204	0.569607	8.52163	17.8435	GPX4	GO_Biological_Process_2025	1
All_cells	All_DEGs	Mitochondrial Respirasome Assembly (GO:0097250)	'1/9	0.123204	0.569607	8.52163	17.8435	COX7A2	GO_Biological_Process_2025	1
All_cells	All_DEGs	Regulation of CD8-positive, Alpha-Beta T Cell Activation (GO:2001185)	'1/9	0.123204	0.569607	8.52163	17.8435	HLA-A	GO_Biological_Process_2025	1
All_cells	All_DEGs	Regulation of NMDA Receptor Activity (GO:2000310)	'1/9	0.123204	0.569607	8.52163	17.8435	RELN	GO_Biological_Process_2025	1
All_cells	All_DEGs	Skeletal Muscle Tissue Development (GO:0007519)	'2/42	0.123773	0.569607	3.41493	7.13484	RYR1;MYH14	GO_Biological_Process_2025	2
All_cells	All_DEGs	Regulation of Cellular Component Size (GO:0032535)	'2/42	0.123773	0.569607	3.41493	7.13484	RAP1GAP2;RNASE1	GO_Biological_Process_2025	2
All_cells	All_DEGs	Neuron Projection Guidance (GO:0097485)	'4/132	0.125697	0.569607	2.13964	4.43736	PLEKHG4;RELN;CNTN5;UNC5D	GO_Biological_Process_2025	4
All_cells	All_DEGs	Long-Chain Fatty Acid Metabolic Process (GO:0001676)	'3/85	0.126015	0.569607	2.50208	5.18269	GPX4;PLA2G4C;GSTA1	GO_Biological_Process_2025	3
All_cells	All_DEGs	Central Nervous System Development (GO:0007417)	'7/288	0.126784	0.569607	1.71023	3.5321	CNTNAP2;MARCKSL1;RNF103;RELN;CNTN5;SOX9;CELSR1	GO_Biological_Process_2025	7
All_cells	All_DEGs	Regulation of Epithelial Cell Migration (GO:0010632)	'2/43	0.128625	0.569607	3.33147	6.83235	PLCG2;SOX9	GO_Biological_Process_2025	2
All_cells	All_DEGs	Negative Regulation of Ubiquitin-Dependent Protein Catabolic Process (GO:2000059)	'2/43	0.128625	0.569607	3.33147	6.83235	RPL23;TAF9	GO_Biological_Process_2025	2
All_cells	All_DEGs	Non-Canonical Wnt Signaling Pathway (GO:0035567)	'2/43	0.128625	0.569607	3.33147	6.83235	CELSR1;RNASE1	GO_Biological_Process_2025	2
All_cells	All_DEGs	Release of Sequestered Calcium Ion Into Cytosol (GO:0051209)	'2/43	0.128625	0.569607	3.33147	6.83235	RYR1;PLCG2	GO_Biological_Process_2025	2
All_cells	All_DEGs	Response to Unfolded Protein (GO:0006986)	'2/44	0.133521	0.569607	3.25198	6.54785	DNAJB1;HSPA1A	GO_Biological_Process_2025	2
All_cells	All_DEGs	Regulation of Long-Term Synaptic Depression (GO:1900452)	'1/10	0.135924	0.569607	7.57439	15.1159	PENK	GO_Biological_Process_2025	1
All_cells	All_DEGs	Regulation of Macrophage Migration (GO:1905521)	'1/10	0.135924	0.569607	7.57439	15.1159	CD81	GO_Biological_Process_2025	1
All_cells	All_DEGs	Regulation of Mesenchymal Stem Cell Differentiation (GO:2000739)	'1/10	0.135924	0.569607	7.57439	15.1159	SOX9	GO_Biological_Process_2025	1
All_cells	All_DEGs	Regulation of Mononuclear Cell Migration (GO:0071675)	'1/10	0.135924	0.569607	7.57439	15.1159	CD81	GO_Biological_Process_2025	1
All_cells	All_DEGs	Negative Regulation of Steroid Biosynthetic Process (GO:0010894)	'1/10	0.135924	0.569607	7.57439	15.1159	DKKL1	GO_Biological_Process_2025	1
All_cells	All_DEGs	Regulation of Neutrophil Migration (GO:1902622)	'1/10	0.135924	0.569607	7.57439	15.1159	RNASE1	GO_Biological_Process_2025	1
All_cells	All_DEGs	Regulation of Phagocytosis, Engulfment (GO:0060099)	'1/10	0.135924	0.569607	7.57439	15.1159	PLCG2	GO_Biological_Process_2025	1
All_cells	All_DEGs	Cellular Response to UV-A (GO:0071492)	'1/10	0.135924	0.569607	7.57439	15.1159	OPN5	GO_Biological_Process_2025	1
All_cells	All_DEGs	Response to Yeast (GO:0001878)	'1/10	0.135924	0.569607	7.57439	15.1159	PLCG2	GO_Biological_Process_2025	1
All_cells	All_DEGs	Copper Ion Transport (GO:0006825)	'1/10	0.135924	0.569607	7.57439	15.1159	COX17	GO_Biological_Process_2025	1
All_cells	All_DEGs	Positive Regulation of Branching Involved in Ureteric Bud Morphogenesis (GO:0090190)	'1/10	0.135924	0.569607	7.57439	15.1159	SOX9	GO_Biological_Process_2025	1
All_cells	All_DEGs	Sarcoplasmic Reticulum Calcium Ion Transport (GO:0070296)	'1/10	0.135924	0.569607	7.57439	15.1159	RYR1	GO_Biological_Process_2025	1
All_cells	All_DEGs	Positive Regulation of Centriole Replication (GO:0046601)	'1/10	0.135924	0.569607	7.57439	15.1159	PPP1R35	GO_Biological_Process_2025	1
All_cells	All_DEGs	Small Nucleolar Ribonucleoprotein Complex Assembly (GO:0000491)	'1/10	0.135924	0.569607	7.57439	15.1159	TAF9	GO_Biological_Process_2025	1
All_cells	All_DEGs	Positive Regulation of Chondrocyte Differentiation (GO:0032332)	'1/10	0.135924	0.569607	7.57439	15.1159	SOX9	GO_Biological_Process_2025	1
All_cells	All_DEGs	Positive Regulation of Hemostasis (GO:1900048)	'1/10	0.135924	0.569607	7.57439	15.1159	TTF2	GO_Biological_Process_2025	1
All_cells	All_DEGs	Ether Lipid Biosynthetic Process (GO:0008611)	'1/10	0.135924	0.569607	7.57439	15.1159	PLA2G4C	GO_Biological_Process_2025	1
All_cells	All_DEGs	Receptor-Mediated Endocytosis of Virus by Host Cell (GO:0019065)	'1/10	0.135924	0.569607	7.57439	15.1159	RNASEK	GO_Biological_Process_2025	1
All_cells	All_DEGs	Positive Regulation of Cell-Matrix Adhesion (GO:0001954)	'2/45	0.138459	0.569607	3.1762	6.27991	CDH13;RNASE1	GO_Biological_Process_2025	2
All_cells	All_DEGs	Endothelial Cell Migration (GO:0043542)	'2/45	0.138459	0.569607	3.1762	6.27991	LPXN;CDH13	GO_Biological_Process_2025	2
All_cells	All_DEGs	Positive Regulation of Plasma Membrane Bounded Cell Projection Assembly (GO:0120034)	'3/90	0.142488	0.569607	2.35768	4.59395	GPM6A;PPP1R35;RNASE1	GO_Biological_Process_2025	3
All_cells	All_DEGs	Development of Primary Male Sexual Characteristics (GO:0046546)	'2/46	0.143436	0.569607	3.10385	6.02726	ADAM2;SOX9	GO_Biological_Process_2025	2
All_cells	All_DEGs	Male Gonad Development (GO:0008584)	'2/46	0.143436	0.569607	3.10385	6.02726	ADAM2;SOX9	GO_Biological_Process_2025	2
All_cells	All_DEGs	Regulation of Calcium-Mediated Signaling (GO:0050848)	'2/46	0.143436	0.569607	3.10385	6.02726	PLCG2;CDH13	GO_Biological_Process_2025	2
All_cells	All_DEGs	Generation of Neurons (GO:0048699)	'5/192	0.147538	0.569607	1.8316	3.50507	BTG4;GPM6A;RELN;CELSR1;RNASE1	GO_Biological_Process_2025	5
All_cells	All_DEGs	Positive Regulation of Cytokine-Mediated Signaling Pathway (GO:0001961)	'2/47	0.14845	0.569607	3.03472	5.78875	HSPA1B;HSPA1A	GO_Biological_Process_2025	2
All_cells	All_DEGs	Negative Regulation of Extracellular Matrix Organization (GO:1903054)	'1/11	0.148459	0.569607	6.81661	13.0023	CST3	GO_Biological_Process_2025	1
All_cells	All_DEGs	Negative Regulation of Fibrinolysis (GO:0051918)	'1/11	0.148459	0.569607	6.81661	13.0023	TTF2	GO_Biological_Process_2025	1
All_cells	All_DEGs	Negative Regulation of Heart Contraction (GO:0045822)	'1/11	0.148459	0.569607	6.81661	13.0023	SPTBN4	GO_Biological_Process_2025	1
All_cells	All_DEGs	Regulation of Ferroptosis (GO:0110075)	'1/11	0.148459	0.569607	6.81661	13.0023	GPX4	GO_Biological_Process_2025	1
All_cells	All_DEGs	- Reg of Mt Outer Membrane Permeabilization Inv in Apoptotic Sgnlng Pway (GO:1901029)	'1/11	0.148459	0.569607	6.81661	13.0023	HSPA1A	GO_Biological_Process_2025	1
All_cells	All_DEGs	Regulation of Mesenchymal Cell Proliferation (GO:0010464)	'1/11	0.148459	0.569607	6.81661	13.0023	SOX9	GO_Biological_Process_2025	1
All_cells	All_DEGs	Negative Regulation of Ubiquitin-Protein Transferase Activity (GO:0051444)	'1/11	0.148459	0.569607	6.81661	13.0023	RPL23	GO_Biological_Process_2025	1
All_cells	All_DEGs	Regulation of Synapse Maturation (GO:0090128)	'1/11	0.148459	0.569607	6.81661	13.0023	RELN	GO_Biological_Process_2025	1
All_cells	All_DEGs	Phosphatidylethanolamine Acyl-Chain Remodeling (GO:0036152)	'1/11	0.148459	0.569607	6.81661	13.0023	PLA2G4C	GO_Biological_Process_2025	1
All_cells	All_DEGs	Central Nervous System Projection Neuron Axonogenesis (GO:0021952)	'1/11	0.148459	0.569607	6.81661	13.0023	SPTBN4	GO_Biological_Process_2025	1
All_cells	All_DEGs	Skeletal Muscle Fiber Development (GO:0048741)	'1/11	0.148459	0.569607	6.81661	13.0023	RYR1	GO_Biological_Process_2025	1
All_cells	All_DEGs	Endocytosis Involved in Viral Entry Into Host Cell (GO:0075509)	'1/11	0.148459	0.569607	6.81661	13.0023	RNASEK	GO_Biological_Process_2025	1
All_cells	All_DEGs	Endosomal Lumen Acidification (GO:0048388)	'1/11	0.148459	0.569607	6.81661	13.0023	RNASEK	GO_Biological_Process_2025	1
All_cells	All_DEGs	Excitatory Synapse Assembly (GO:1904861)	'1/11	0.148459	0.569607	6.81661	13.0023	RELN	GO_Biological_Process_2025	1
All_cells	All_DEGs	Positive Regulation of Oxidoreductase Activity (GO:0051353)	'1/11	0.148459	0.569607	6.81661	13.0023	COX17	GO_Biological_Process_2025	1
All_cells	All_DEGs	Macrophage Activation Involved in Immune Response (GO:0002281)	'1/11	0.148459	0.569607	6.81661	13.0023	PLCG2	GO_Biological_Process_2025	1
All_cells	All_DEGs	Plasma Membrane Bounded Cell Projection Organization (GO:0120036)	'4/141	0.149064	0.569607	1.99816	3.80326	GPM6A;CNTNAP2;RNASE1;ROPN1	GO_Biological_Process_2025	4
All_cells	All_DEGs	Erythrocyte Differentiation (GO:0030218)	'2/48	0.1535	0.569607	2.9686	5.56333	ATP5IF1;RPS14	GO_Biological_Process_2025	2
All_cells	All_DEGs	Synapse Organization (GO:0050808)	'4/144	0.157202	0.569607	1.95504	3.61728	GPM6A;LRRC4C;ERC2;SHANK2	GO_Biological_Process_2025	4
All_cells	All_DEGs	Arachidonate Metabolic Process (GO:0019369)	'2/49	0.158582	0.569607	2.90529	5.35005	GPX4;PLA2G4C	GO_Biological_Process_2025	2
All_cells	All_DEGs	Translational Elongation (GO:0006414)	'2/49	0.158582	0.569607	2.90529	5.35005	EEF1A1;SAYSD1	GO_Biological_Process_2025	2
All_cells	All_DEGs	mRNA Catabolic Process (GO:0006402)	'2/49	0.158582	0.569607	2.90529	5.35005	HSPA1B;HSPA1A	GO_Biological_Process_2025	2
All_cells	All_DEGs	Negative Regulation of Hemostasis (GO:1900047)	'1/12	0.160813	0.569607	6.1966	11.3244	TTF2	GO_Biological_Process_2025	1
All_cells	All_DEGs	- Reg of Intrinsic Apoptotic Sgnlng Pway in Resp to DNA Damage by P53 Cls Mediator (GO:1902166)	'1/12	0.160813	0.569607	6.1966	11.3244	TAF9	GO_Biological_Process_2025	1
All_cells	All_DEGs	Negative Regulation of Mitochondrial Membrane Permeability (GO:0035795)	'1/12	0.160813	0.569607	6.1966	11.3244	HSPA1A	GO_Biological_Process_2025	1
All_cells	All_DEGs	Regulation of Ketone Metabolic Process (GO:0010565)	'1/12	0.160813	0.569607	6.1966	11.3244	PDK4	GO_Biological_Process_2025	1
All_cells	All_DEGs	Regulation of Lamellipodium Organization (GO:1902743)	'1/12	0.160813	0.569607	6.1966	11.3244	RNASE1	GO_Biological_Process_2025	1
All_cells	All_DEGs	Adult Locomotory Behavior (GO:0008344)	'1/12	0.160813	0.569607	6.1966	11.3244	SPTBN4	GO_Biological_Process_2025	1
All_cells	All_DEGs	Regulation of Short-Term Neuronal Synaptic Plasticity (GO:0048172)	'1/12	0.160813	0.569607	6.1966	11.3244	SHISA9	GO_Biological_Process_2025	1
All_cells	All_DEGs	Positive Regulation of CD4-positive, Alpha-Beta T Cell Activation (GO:2000516)	'1/12	0.160813	0.569607	6.1966	11.3244	CD81	GO_Biological_Process_2025	1
All_cells	All_DEGs	Detection of Bacterium (GO:0016045)	'1/12	0.160813	0.569607	6.1966	11.3244	HLA-A	GO_Biological_Process_2025	1
All_cells	All_DEGs	Sodium Ion Export Across Plasma Membrane (GO:0036376)	'1/12	0.160813	0.569607	6.1966	11.3244	SLC4A4	GO_Biological_Process_2025	1
All_cells	All_DEGs	Sperm DNA Condensation (GO:0035092)	'1/12	0.160813	0.569607	6.1966	11.3244	PIWIL1	GO_Biological_Process_2025	1
All_cells	All_DEGs	Termination of RNA Polymerase II Transcription (GO:0006369)	'1/12	0.160813	0.569607	6.1966	11.3244	TTF2	GO_Biological_Process_2025	1
All_cells	All_DEGs	Fibrinolysis (GO:0042730)	'1/12	0.160813	0.569607	6.1966	11.3244	TTF2	GO_Biological_Process_2025	1
All_cells	All_DEGs	Positive Regulation of Neuroinflammatory Response (GO:0150078)	'1/12	0.160813	0.569607	6.1966	11.3244	PLCG2	GO_Biological_Process_2025	1
All_cells	All_DEGs	Glycerolipid Metabolic Process (GO:0046486)	'1/12	0.160813	0.569607	6.1966	11.3244	DGKB	GO_Biological_Process_2025	1
All_cells	All_DEGs	Positive Regulation of Reactive Oxygen Species Biosynthetic Process (GO:1903428)	'1/12	0.160813	0.569607	6.1966	11.3244	PLCG2	GO_Biological_Process_2025	1
All_cells	All_DEGs	Intracellular Copper Ion Homeostasis (GO:0006878)	'1/12	0.160813	0.569607	6.1966	11.3244	PRND	GO_Biological_Process_2025	1
All_cells	All_DEGs	Post-Translational Protein Targeting to Endoplasmic Reticulum Membrane (GO:0006620)	'1/12	0.160813	0.569607	6.1966	11.3244	SEC61G	GO_Biological_Process_2025	1
All_cells	All_DEGs	Protein Insertion Into Mitochondrial Inner Membrane (GO:0045039)	'1/12	0.160813	0.569607	6.1966	11.3244	ROMO1	GO_Biological_Process_2025	1
All_cells	All_DEGs	Morphogenesis of a Polarized Epithelium (GO:0001738)	'1/12	0.160813	0.569607	6.1966	11.3244	CELSR1	GO_Biological_Process_2025	1
All_cells	All_DEGs	Regulation of Astrocyte Differentiation (GO:0048710)	'1/12	0.160813	0.569607	6.1966	11.3244	TTF2	GO_Biological_Process_2025	1
All_cells	All_DEGs	Negative Regulation of Protein Metabolic Process (GO:0051248)	'4/146	0.162716	0.569607	1.92731	3.49951	CST3;TTF2;PFDN5;PFDN6	GO_Biological_Process_2025	4
All_cells	All_DEGs	Sensory Perception of Sound (GO:0007605)	'3/96	0.16313	0.569607	2.2049	3.99794	SPTBN4;MYH14;LHFPL3	GO_Biological_Process_2025	3
All_cells	All_DEGs	Regulation of Tumor Necrosis Factor-Mediated Signaling Pathway (GO:0010803)	'2/50	0.163695	0.569607	2.84462	5.14805	HSPA1B;HSPA1A	GO_Biological_Process_2025	2
All_cells	All_DEGs	Antimicrobial Humoral Response (GO:0019730)	'4/147	0.1655	0.569607	1.91374	3.4424	ROMO1;TTF2;HLA-A;FAU	GO_Biological_Process_2025	4
All_cells	All_DEGs	Positive Regulation of Metabolic Process (GO:0009893)	'4/147	0.1655	0.569607	1.91374	3.4424	ESRRG;ROMO1;TTF2;KSR2	GO_Biological_Process_2025	4
All_cells	All_DEGs	Axonogenesis (GO:0007409)	'5/200	0.165999	0.569607	1.75574	3.1529	SPTBN4;PLEKHG4;RELN;CNTN5;UNC5D	GO_Biological_Process_2025	5
All_cells	All_DEGs	Regulation of Epidermal Growth Factor Receptor Signaling Pathway (GO:0042058)	'2/51	0.168837	0.569607	2.78642	4.95654	NEU3;CDH13	GO_Biological_Process_2025	2
All_cells	All_DEGs	Proton Transmembrane Transport (GO:1902600)	'2/51	0.168837	0.569607	2.78642	4.95654	RNASEK;ATP5MF	GO_Biological_Process_2025	2
All_cells	All_DEGs	rRNA Metabolic Process (GO:0016072)	'3/98	0.170201	0.569607	2.15826	3.82179	RPS17;RPS28;RPS16	GO_Biological_Process_2025	3
All_cells	All_DEGs	Reg of Intrinsic Apoptotic Sgnlng Pway in Resp to DNA Damage by P53 Cls Mediator (GO:1902165)	'1/13	0.172989	0.569607	5.67993	9.9656	TAF9	GO_Biological_Process_2025	1
All_cells	All_DEGs	Ag Processing and Presentation of Endogenous Pep Ag via MHC Cls I via ER Pway (GO:0002484)	'1/13	0.172989	0.569607	5.67993	9.9656	HLA-A	GO_Biological_Process_2025	1
All_cells	All_DEGs	Ag Processing and Presentation of Endogenous Pep Ag via MHC Cls I via ER Pway, TAP-ind (GO:0002486)	'1/13	0.172989	0.569607	5.67993	9.9656	HLA-A	GO_Biological_Process_2025	1
All_cells	All_DEGs	Antigen Processing and Presentation of Endogenous Peptide Antigen via MHC Class Ib (GO:0002476)	'1/13	0.172989	0.569607	5.67993	9.9656	HLA-A	GO_Biological_Process_2025	1
All_cells	All_DEGs	Antigen Processing and Presentation of Peptide Antigen via MHC Class Ib (GO:0002428)	'1/13	0.172989	0.569607	5.67993	9.9656	HLA-A	GO_Biological_Process_2025	1
All_cells	All_DEGs	Neuronal Action Potential (GO:0019228)	'1/13	0.172989	0.569607	5.67993	9.9656	MYH14	GO_Biological_Process_2025	1
All_cells	All_DEGs	Cell Projection Assembly (GO:0030031)	'1/13	0.172989	0.569607	5.67993	9.9656	RNASE1	GO_Biological_Process_2025	1
All_cells	All_DEGs	Response to UV-A (GO:0070141)	'1/13	0.172989	0.569607	5.67993	9.9656	OPN5	GO_Biological_Process_2025	1
All_cells	All_DEGs	Cochlea Morphogenesis (GO:0090103)	'1/13	0.172989	0.569607	5.67993	9.9656	SOX9	GO_Biological_Process_2025	1
All_cells	All_DEGs	Positive Regulation of Coagulation (GO:0050820)	'1/13	0.172989	0.569607	5.67993	9.9656	TTF2	GO_Biological_Process_2025	1
All_cells	All_DEGs	Endonucleolytic Clvg of Tricistronic rRNA Trnscpt (GO:0000479)	'1/13	0.172989	0.569607	5.67993	9.9656	RPS21	GO_Biological_Process_2025	1
All_cells	All_DEGs	Positive Regulation of Type 2 Immune Response (GO:0002830)	'1/13	0.172989	0.569607	5.67993	9.9656	CD81	GO_Biological_Process_2025	1
All_cells	All_DEGs	Lipid Droplet Formation (GO:0140042)	'1/13	0.172989	0.569607	5.67993	9.9656	PLA2G4C	GO_Biological_Process_2025	1
All_cells	All_DEGs	Protein Alpha-1,2-Demannosylation (GO:0036508)	'1/13	0.172989	0.569607	5.67993	9.9656	RNF103	GO_Biological_Process_2025	1
All_cells	All_DEGs	Membrane Protein Intracellular Domain Proteolysis (GO:0031293)	'1/13	0.172989	0.569607	5.67993	9.9656	APH1B	GO_Biological_Process_2025	1
All_cells	All_DEGs	Motor Neuron Axon Guidance (GO:0008045)	'1/13	0.172989	0.569607	5.67993	9.9656	RNASE1	GO_Biological_Process_2025	1
All_cells	All_DEGs	Regulation of Actomyosin Structure Organization (GO:0110020)	'1/13	0.172989	0.569607	5.67993	9.9656	RNASE1	GO_Biological_Process_2025	1
All_cells	All_DEGs	Regulation of Branching Involved in Ureteric Bud Morphogenesis (GO:0090189)	'1/13	0.172989	0.569607	5.67993	9.9656	SOX9	GO_Biological_Process_2025	1
All_cells	All_DEGs	Negative Regulation of Cell Activation (GO:0050866)	'1/13	0.172989	0.569607	5.67993	9.9656	TTF2	GO_Biological_Process_2025	1
All_cells	All_DEGs	Negative Regulation of Protein Ubiquitination (GO:0031397)	'2/52	0.174007	0.569607	2.73056	4.77482	HSPA1B;HSPA1A	GO_Biological_Process_2025	2
All_cells	All_DEGs	Positive Regulation of Proteolysis (GO:0045862)	'2/52	0.174007	0.569607	2.73056	4.77482	ATP5IF1;AURKAIP1	GO_Biological_Process_2025	2
All_cells	All_DEGs	Negative Regulation of Immune System Process (GO:0002683)	'2/53	0.179201	0.569607	2.67688	4.60221	COL3A1;SOX9	GO_Biological_Process_2025	2
All_cells	All_DEGs	Antibacterial Humoral Response (GO:0019731)	'2/53	0.179201	0.569607	2.67688	4.60221	HLA-A;FAU	GO_Biological_Process_2025	2
All_cells	All_DEGs	Cellular Response to Mechanical Stimulus (GO:0071260)	'2/53	0.179201	0.569607	2.67688	4.60221	PIEZO2;SOX9	GO_Biological_Process_2025	2
All_cells	All_DEGs	Cell Junction Assembly (GO:0034329)	'3/101	0.180969	0.569607	2.09187	3.57591	GPM6A;CDH13;SHANK2	GO_Biological_Process_2025	3
All_cells	All_DEGs	Plasma Membrane Bounded Cell Projection Morphogenesis (GO:0120039)	'2/54	0.18442	0.569607	2.62527	4.43812	CNTNAP2;GPM6A	GO_Biological_Process_2025	2
All_cells	All_DEGs	Gonad Development (GO:0008406)	'2/54	0.18442	0.569607	2.62527	4.43812	ADAM2;SOX9	GO_Biological_Process_2025	2
All_cells	All_DEGs	Negative Regulation of Coagulation (GO:0050819)	'1/14	0.184988	0.569607	5.24275	8.84694	TTF2	GO_Biological_Process_2025	1
All_cells	All_DEGs	Regulation of Coagulation (GO:0050818)	'1/14	0.184988	0.569607	5.24275	8.84694	TTF2	GO_Biological_Process_2025	1
All_cells	All_DEGs	Regulation of Extracellular Matrix Disassembly (GO:0010715)	'1/14	0.184988	0.569607	5.24275	8.84694	CST3	GO_Biological_Process_2025	1
All_cells	All_DEGs	Regulation of Leukocyte Migration (GO:0002685)	'1/14	0.184988	0.569607	5.24275	8.84694	RNASE1	GO_Biological_Process_2025	1
All_cells	All_DEGs	Regulation of Macrophage Cytokine Production (GO:0010935)	'1/14	0.184988	0.569607	5.24275	8.84694	PLCG2	GO_Biological_Process_2025	1
All_cells	All_DEGs	Phosphatidylcholine Acyl-Chain Remodeling (GO:0036151)	'1/14	0.184988	0.569607	5.24275	8.84694	PLA2G4C	GO_Biological_Process_2025	1
All_cells	All_DEGs	Positive Regulation of T Cell Receptor Signaling Pathway (GO:0050862)	'1/14	0.184988	0.569607	5.24275	8.84694	CD81	GO_Biological_Process_2025	1
All_cells	All_DEGs	Cotranslational Protein Targeting to Membrane (GO:0006613)	'1/14	0.184988	0.569607	5.24275	8.84694	SRP14	GO_Biological_Process_2025	1
All_cells	All_DEGs	Synaptonemal Complex Assembly (GO:0007130)	'1/14	0.184988	0.569607	5.24275	8.84694	SYCE3	GO_Biological_Process_2025	1
All_cells	All_DEGs	Synaptonemal Complex Organization (GO:0070193)	'1/14	0.184988	0.569607	5.24275	8.84694	SYCE3	GO_Biological_Process_2025	1
All_cells	All_DEGs	Establishment of Protein Localization to Chromosome (GO:0070199)	'1/14	0.184988	0.569607	5.24275	8.84694	LRWD1	GO_Biological_Process_2025	1
All_cells	All_DEGs	Extracellular Transport (GO:0006858)	'1/14	0.184988	0.569607	5.24275	8.84694	SPAG6	GO_Biological_Process_2025	1
All_cells	All_DEGs	Positive Regulation of Long-Term Synaptic Potentiation (GO:1900273)	'1/14	0.184988	0.569607	5.24275	8.84694	RELN	GO_Biological_Process_2025	1
All_cells	All_DEGs	Glycolipid Catabolic Process (GO:0019377)	'1/14	0.184988	0.569607	5.24275	8.84694	NEU3	GO_Biological_Process_2025	1
All_cells	All_DEGs	Positive Regulation of Response to Cytokine Stimulus (GO:0060760)	'1/14	0.184988	0.569607	5.24275	8.84694	TAF9	GO_Biological_Process_2025	1
All_cells	All_DEGs	Medium-Chain Fatty Acid Metabolic Process (GO:0051791)	'1/14	0.184988	0.569607	5.24275	8.84694	OXSM	GO_Biological_Process_2025	1
All_cells	All_DEGs	Meiotic Sister Chromatid Cohesion (GO:0051177)	'1/14	0.184988	0.569607	5.24275	8.84694	HORMAD2	GO_Biological_Process_2025	1
All_cells	All_DEGs	Myotube Cell Development (GO:0014904)	'1/14	0.184988	0.569607	5.24275	8.84694	RYR1	GO_Biological_Process_2025	1
All_cells	All_DEGs	Negative Regulation of Cartilage Development (GO:0061037)	'1/14	0.184988	0.569607	5.24275	8.84694	SOX9	GO_Biological_Process_2025	1
All_cells	All_DEGs	Rho Protein Signal Transduction (GO:0007266)	'2/55	0.189659	0.570339	2.5756	4.28201	CDH13;CELSR1	GO_Biological_Process_2025	2
All_cells	All_DEGs	Regulation of Metabolic Process (GO:0019222)	'2/55	0.189659	0.570339	2.5756	4.28201	PDK4;RNASE1	GO_Biological_Process_2025	2
All_cells	All_DEGs	Striated Muscle Contraction (GO:0006941)	'2/55	0.189659	0.570339	2.5756	4.28201	RYR1;MYH14	GO_Biological_Process_2025	2
All_cells	All_DEGs	Icosanoid Metabolic Process (GO:0006690)	'2/55	0.189659	0.570339	2.5756	4.28201	GPX4;PLA2G4C	GO_Biological_Process_2025	2
All_cells	All_DEGs	Neuron Projection Morphogenesis (GO:0048812)	'4/157	0.194226	0.570339	1.78774	2.92963	GPM6A;SPTBN4;CNTNAP2;SPAG6	GO_Biological_Process_2025	4
All_cells	All_DEGs	Protein Stabilization (GO:0050821)	'5/212	0.19528	0.570339	1.65294	2.69977	RPL23;TAF9;HSPA1B;PFDN6;HSPA1A	GO_Biological_Process_2025	5
All_cells	All_DEGs	Negative Regulation of Chondrocyte Differentiation (GO:0032331)	'1/15	0.196814	0.570339	4.86802	7.91294	SOX9	GO_Biological_Process_2025	1
All_cells	All_DEGs	Regulation of Clathrin-Dependent Endocytosis (GO:2000369)	'1/15	0.196814	0.570339	4.86802	7.91294	NEU3	GO_Biological_Process_2025	1
All_cells	All_DEGs	- Reg of Endoplasmic Reticulum Stress-Induced Intrinsic Apoptotic Sgnlng Pway (GO:1902236)	'1/15	0.196814	0.570339	4.86802	7.91294	HSPA1A	GO_Biological_Process_2025	1
All_cells	All_DEGs	Amyloid Precursor Protein Catabolic Process (GO:0042987)	'1/15	0.196814	0.570339	4.86802	7.91294	APH1B	GO_Biological_Process_2025	1
All_cells	All_DEGs	Amyloid-Beta Metabolic Process (GO:0050435)	'1/15	0.196814	0.570339	4.86802	7.91294	APH1B	GO_Biological_Process_2025	1
All_cells	All_DEGs	Regulation of Peptidase Activity (GO:0052547)	'1/15	0.196814	0.570339	4.86802	7.91294	CST3	GO_Biological_Process_2025	1
All_cells	All_DEGs	Cardiac Myofibril Assembly (GO:0055003)	'1/15	0.196814	0.570339	4.86802	7.91294	OBSL1	GO_Biological_Process_2025	1
All_cells	All_DEGs	Copper Ion Homeostasis (GO:0055070)	'1/15	0.196814	0.570339	4.86802	7.91294	PRND	GO_Biological_Process_2025	1
All_cells	All_DEGs	Digestive System Development (GO:0055123)	'1/15	0.196814	0.570339	4.86802	7.91294	CLMP	GO_Biological_Process_2025	1
All_cells	All_DEGs	Unsaturated Fatty Acid Biosynthetic Process (GO:0006636)	'1/15	0.196814	0.570339	4.86802	7.91294	PTGDS	GO_Biological_Process_2025	1
All_cells	All_DEGs	Prostaglandin Biosynthetic Process (GO:0001516)	'1/15	0.196814	0.570339	4.86802	7.91294	PTGDS	GO_Biological_Process_2025	1
All_cells	All_DEGs	Regulation of ATP Metabolic Process (GO:1903578)	'1/15	0.196814	0.570339	4.86802	7.91294	ATP5IF1	GO_Biological_Process_2025	1
All_cells	All_DEGs	Regulation of Carbohydrate Metabolic Process (GO:0006109)	'1/15	0.196814	0.570339	4.86802	7.91294	PDK4	GO_Biological_Process_2025	1
All_cells	All_DEGs	Regulation of Cellular Response to Heat (GO:1900034)	'1/15	0.196814	0.570339	4.86802	7.91294	DNAJB1	GO_Biological_Process_2025	1
All_cells	All_DEGs	Memory (GO:0007613)	'2/57	0.200197	0.570339	2.48169	3.99168	CUX2;RELN	GO_Biological_Process_2025	2
All_cells	All_DEGs	Myeloid Cell Differentiation (GO:0030099)	'2/57	0.200197	0.570339	2.48169	3.99168	ATP5IF1;RPS14	GO_Biological_Process_2025	2
All_cells	All_DEGs	Negative Regulation of Protein Modification by Small Protein Conjugation or Removal (GO:1903321)	'2/58	0.205492	0.570339	2.43725	3.85658	HSPA1B;HSPA1A	GO_Biological_Process_2025	2
All_cells	All_DEGs	Regulation of Mitotic Nuclear Division (GO:0007088)	'2/58	0.205492	0.570339	2.43725	3.85658	AURKAIP1;OBSL1	GO_Biological_Process_2025	2
All_cells	All_DEGs	Regulation of Fibrinolysis (GO:0051917)	'1/16	0.208469	0.570339	4.54325	7.12366	TTF2	GO_Biological_Process_2025	1
All_cells	All_DEGs	Negative Regulation of Intrinsic Apoptotic Signaling Pathway by P53 Class Mediator (GO:1902254)	'1/16	0.208469	0.570339	4.54325	7.12366	TAF9	GO_Biological_Process_2025	1
All_cells	All_DEGs	Negative Regulation of Myoblast Differentiation (GO:0045662)	'1/16	0.208469	0.570339	4.54325	7.12366	SOX9	GO_Biological_Process_2025	1
All_cells	All_DEGs	Negative Regulation of Platelet Activation (GO:0010544)	'1/16	0.208469	0.570339	4.54325	7.12366	TTF2	GO_Biological_Process_2025	1
All_cells	All_DEGs	Negative Regulation of Synaptic Transmission (GO:0050805)	'1/16	0.208469	0.570339	4.54325	7.12366	SHANK2	GO_Biological_Process_2025	1
All_cells	All_DEGs	Antifungal Innate Immune Response (GO:0061760)	'1/16	0.208469	0.570339	4.54325	7.12366	PLCG2	GO_Biological_Process_2025	1
All_cells	All_DEGs	Base Conversion or Substitution Editing (GO:0016553)	'1/16	0.208469	0.570339	4.54325	7.12366	ADAD2	GO_Biological_Process_2025	1
All_cells	All_DEGs	Regulation of Response to Cytokine Stimulus (GO:0060759)	'1/16	0.208469	0.570339	4.54325	7.12366	TAF9	GO_Biological_Process_2025	1
All_cells	All_DEGs	Cellular Response to Alkaloid (GO:0071312)	'1/16	0.208469	0.570339	4.54325	7.12366	RYR1	GO_Biological_Process_2025	1
All_cells	All_DEGs	Ceramide Catabolic Process (GO:0046514)	'1/16	0.208469	0.570339	4.54325	7.12366	NEU3	GO_Biological_Process_2025	1
All_cells	All_DEGs	Ruffle Organization (GO:0031529)	'1/16	0.208469	0.570339	4.54325	7.12366	RNASE1	GO_Biological_Process_2025	1
All_cells	All_DEGs	Positive Regulation of Collagen Biosynthetic Process (GO:0032967)	'1/16	0.208469	0.570339	4.54325	7.12366	TTF2	GO_Biological_Process_2025	1
All_cells	All_DEGs	Spermatid Nucleus Differentiation (GO:0007289)	'1/16	0.208469	0.570339	4.54325	7.12366	PIWIL1	GO_Biological_Process_2025	1
All_cells	All_DEGs	+ Reg of Myeloid Leukocyte Cytokine Production Inv in Imm Resp (GO:0061081)	'1/16	0.208469	0.570339	4.54325	7.12366	PLCG2	GO_Biological_Process_2025	1
All_cells	All_DEGs	Glycosphingolipid Catabolic Process (GO:0046479)	'1/16	0.208469	0.570339	4.54325	7.12366	NEU3	GO_Biological_Process_2025	1
All_cells	All_DEGs	Positive Regulation of Positive Chemotaxis (GO:0050927)	'1/16	0.208469	0.570339	4.54325	7.12366	CDH13	GO_Biological_Process_2025	1
All_cells	All_DEGs	Lipopolysaccharide-Mediated Signaling Pathway (GO:0031663)	'1/16	0.208469	0.570339	4.54325	7.12366	PLCG2	GO_Biological_Process_2025	1
All_cells	All_DEGs	Protein Localization to Vacuole (GO:0072665)	'1/16	0.208469	0.570339	4.54325	7.12366	CD81	GO_Biological_Process_2025	1
All_cells	All_DEGs	Mesenchyme Morphogenesis (GO:0072132)	'1/16	0.208469	0.570339	4.54325	7.12366	SOX9	GO_Biological_Process_2025	1
All_cells	All_DEGs	Microtubule-Based Transport (GO:0099111)	'1/16	0.208469	0.570339	4.54325	7.12366	SPAG6	GO_Biological_Process_2025	1
All_cells	All_DEGs	Regulation of Proteasomal Ubiquitin-Dependent Protein Catabolic Process (GO:0032434)	'3/109	0.21051	0.570339	1.93321	3.01236	TAF9;HSPA1B;HSPA1A	GO_Biological_Process_2025	3
All_cells	All_DEGs	Cellular Response to Calcium Ion (GO:0071277)	'2/59	0.210802	0.570339	2.39437	3.72765	RYR1;PLCG2	GO_Biological_Process_2025	2
All_cells	All_DEGs	Response to Interleukin-1 (GO:0070555)	'2/59	0.210802	0.570339	2.39437	3.72765	TAF9;SOX9	GO_Biological_Process_2025	2
All_cells	All_DEGs	Protein Polymerization (GO:0051258)	'2/59	0.210802	0.570339	2.39437	3.72765	GPX4;RNASE1	GO_Biological_Process_2025	2
All_cells	All_DEGs	Phosphatidylcholine Metabolic Process (GO:0046470)	'2/60	0.216125	0.570339	2.35297	3.60451	PLA2G4C;CEPT1	GO_Biological_Process_2025	2
All_cells	All_DEGs	Negative Regulation of Developmental Process (GO:0051093)	'3/111	0.218057	0.570339	1.89721	2.88945	CST3;SS18;SOX9	GO_Biological_Process_2025	3
All_cells	All_DEGs	Regulation of Cellular Response to Stress (GO:0080135)	'3/111	0.218057	0.570339	1.89721	2.88945	DNAJB1;ENY2;TAF9	GO_Biological_Process_2025	3
All_cells	All_DEGs	Actin Filament Capping (GO:0051693)	'1/17	0.219955	0.570339	4.25908	6.44966	CAPZA3	GO_Biological_Process_2025	1
All_cells	All_DEGs	Barbed-End Actin Filament Capping (GO:0051016)	'1/17	0.219955	0.570339	4.25908	6.44966	CAPZA3	GO_Biological_Process_2025	1
All_cells	All_DEGs	Regulation of Ubiquitin Protein Ligase Activity (GO:1904666)	'1/17	0.219955	0.570339	4.25908	6.44966	RPL23	GO_Biological_Process_2025	1
All_cells	All_DEGs	Cytoskeleton-Dependent Intracellular Transport (GO:0030705)	'1/17	0.219955	0.570339	4.25908	6.44966	TUBA1B	GO_Biological_Process_2025	1
All_cells	All_DEGs	Positive Regulation of Cartilage Development (GO:0061036)	'1/17	0.219955	0.570339	4.25908	6.44966	SOX9	GO_Biological_Process_2025	1
All_cells	All_DEGs	Positive Regulation of Collagen Metabolic Process (GO:0010714)	'1/17	0.219955	0.570339	4.25908	6.44966	TTF2	GO_Biological_Process_2025	1
All_cells	All_DEGs	Synaptic Membrane Adhesion (GO:0099560)	'1/17	0.219955	0.570339	4.25908	6.44966	LRRC4C	GO_Biological_Process_2025	1
All_cells	All_DEGs	Filopodium Assembly (GO:0046847)	'1/17	0.219955	0.570339	4.25908	6.44966	SPAG6	GO_Biological_Process_2025	1
All_cells	All_DEGs	Gliogenesis (GO:0042063)	'1/17	0.219955	0.570339	4.25908	6.44966	RELN	GO_Biological_Process_2025	1
All_cells	All_DEGs	Prostanoid Biosynthetic Process (GO:0046457)	'1/17	0.219955	0.570339	4.25908	6.44966	PTGDS	GO_Biological_Process_2025	1
All_cells	All_DEGs	Protein Localization to Synapse (GO:0035418)	'1/17	0.219955	0.570339	4.25908	6.44966	RELN	GO_Biological_Process_2025	1
All_cells	All_DEGs	Myeloid Cell Activation Involved in Immune Response (GO:0002275)	'1/17	0.219955	0.570339	4.25908	6.44966	PLCG2	GO_Biological_Process_2025	1
All_cells	All_DEGs	Myoblast Fusion (GO:0007520)	'1/17	0.219955	0.570339	4.25908	6.44966	CD81	GO_Biological_Process_2025	1
All_cells	All_DEGs	Negative Regulation of Anoikis (GO:2000811)	'1/17	0.219955	0.570339	4.25908	6.44966	PDK4	GO_Biological_Process_2025	1
All_cells	All_DEGs	Regulation of Cartilage Development (GO:0061035)	'1/17	0.219955	0.570339	4.25908	6.44966	SOX9	GO_Biological_Process_2025	1
All_cells	All_DEGs	Regulation of Primary Metabolic Process (GO:0080090)	'3/113	0.225659	0.570339	1.86253	2.7728	ENY2;TAF9;PLCG2	GO_Biological_Process_2025	3
All_cells	All_DEGs	ATP Metabolic Process (GO:0046034)	'2/62	0.226807	0.570339	2.27431	3.37429	HSPA1B;HSPA1A	GO_Biological_Process_2025	2
All_cells	All_DEGs	Amyloid Precursor Protein Metabolic Process (GO:0042982)	'1/18	0.231276	0.570339	4.00835	5.8688	APH1B	GO_Biological_Process_2025	1
All_cells	All_DEGs	Nucleotide Biosynthetic Process (GO:0009165)	'1/18	0.231276	0.570339	4.00835	5.8688	PRPS2	GO_Biological_Process_2025	1
All_cells	All_DEGs	Peptide Antigen Assembly With MHC Protein Complex (GO:0002501)	'1/18	0.231276	0.570339	4.00835	5.8688	HLA-A	GO_Biological_Process_2025	1
All_cells	All_DEGs	Positive Regulation by Host of Viral Process (GO:0044794)	'1/18	0.231276	0.570339	4.00835	5.8688	EEF1A1	GO_Biological_Process_2025	1
All_cells	All_DEGs	Response to Axon Injury (GO:0048678)	'1/18	0.231276	0.570339	4.00835	5.8688	PLCG2	GO_Biological_Process_2025	1
All_cells	All_DEGs	Positive Regulation of Alpha-Beta T Cell Activation (GO:0046635)	'1/18	0.231276	0.570339	4.00835	5.8688	HLA-A	GO_Biological_Process_2025	1
All_cells	All_DEGs	Positive Regulation of Antigen Receptor-Mediated Signaling Pathway (GO:0050857)	'1/18	0.231276	0.570339	4.00835	5.8688	CD81	GO_Biological_Process_2025	1
All_cells	All_DEGs	Detection of Mechanical Stimulus Involved in Sensory Perception (GO:0050974)	'1/18	0.231276	0.570339	4.00835	5.8688	PIEZO2	GO_Biological_Process_2025	1
All_cells	All_DEGs	Positive Regulation of Focal Adhesion Assembly (GO:0051894)	'1/18	0.231276	0.570339	4.00835	5.8688	RNASE1	GO_Biological_Process_2025	1
All_cells	All_DEGs	Transposable Element Silencing by Heterochromatin Formation (GO:0141005)	'1/18	0.231276	0.570339	4.00835	5.8688	PIWIL1	GO_Biological_Process_2025	1
All_cells	All_DEGs	Glycerolipid Catabolic Process (GO:0046503)	'1/18	0.231276	0.570339	4.00835	5.8688	PLA2G4C	GO_Biological_Process_2025	1
All_cells	All_DEGs	Linoleic Acid Metabolic Process (GO:0043651)	'1/18	0.231276	0.570339	4.00835	5.8688	GSTA1	GO_Biological_Process_2025	1
All_cells	All_DEGs	Protein Branched Polyubiquitination (GO:0141198)	'1/18	0.231276	0.570339	4.00835	5.8688	ANAPC11	GO_Biological_Process_2025	1
All_cells	All_DEGs	Protein Import Into Mitochondrial Matrix (GO:0030150)	'1/18	0.231276	0.570339	4.00835	5.8688	ROMO1	GO_Biological_Process_2025	1
All_cells	All_DEGs	Purine Ribonucleotide Catabolic Process (GO:0009154)	'1/18	0.231276	0.570339	4.00835	5.8688	HINT1	GO_Biological_Process_2025	1
All_cells	All_DEGs	Regulation of Bicellular Tight Junction Assembly (GO:2000810)	'1/18	0.231276	0.570339	4.00835	5.8688	RNASE1	GO_Biological_Process_2025	1
All_cells	All_DEGs	Positive Regulation of Interleukin-8 Production (GO:0032757)	'2/63	0.232162	0.570339	2.23691	3.2666	HSPA1B;HSPA1A	GO_Biological_Process_2025	2
All_cells	All_DEGs	Positive Regulation of Cell Projection Organization (GO:0031346)	'3/115	0.233312	0.570339	1.82908	2.662	CUX2;RELN;OBSL1	GO_Biological_Process_2025	3
All_cells	All_DEGs	Antimicrobial Humoral Immune Response Mediated by Antimicrobial Peptide (GO:0061844)	'3/116	0.237156	0.570339	1.8128	2.60869	ROMO1;TTF2;FAU	GO_Biological_Process_2025	3
All_cells	All_DEGs	Regulation of Synapse Assembly (GO:0051963)	'2/64	0.237525	0.570339	2.20072	3.16349	CUX2;LHFPL3	GO_Biological_Process_2025	2
All_cells	All_DEGs	Positive Regulation of Neurogenesis (GO:0050769)	'2/64	0.237525	0.570339	2.20072	3.16349	CUX2;OBSL1	GO_Biological_Process_2025	2
All_cells	All_DEGs	Protein N-linked Glycosylation (GO:0006487)	'2/64	0.237525	0.570339	2.20072	3.16349	MGAT4D;KRTCAP2	GO_Biological_Process_2025	2
All_cells	All_DEGs	Modulation of Chemical Synaptic Transmission (GO:0050804)	'3/117	0.241011	0.570339	1.79681	2.5567	RELN;CACNA1A;LRRC4C	GO_Biological_Process_2025	3
All_cells	All_DEGs	Negative Regulation of Canonical Wnt Signaling Pathway (GO:0090090)	'3/117	0.241011	0.570339	1.79681	2.5567	DKKL1;SOX9;PFDN5	GO_Biological_Process_2025	3
All_cells	All_DEGs	Alpha-Beta T Cell Activation (GO:0046631)	'1/19	0.242432	0.570339	3.78547	5.36413	HLA-A	GO_Biological_Process_2025	1
All_cells	All_DEGs	Regulation of Nuclear Division (GO:0051783)	'1/19	0.242432	0.570339	3.78547	5.36413	OBSL1	GO_Biological_Process_2025	1
All_cells	All_DEGs	Antigen Processing and Presentation of Peptide Antigen via MHC Class I (GO:0002474)	'1/19	0.242432	0.570339	3.78547	5.36413	HLA-A	GO_Biological_Process_2025	1
All_cells	All_DEGs	Nuclear Migration (GO:0007097)	'1/19	0.242432	0.570339	3.78547	5.36413	TACC2	GO_Biological_Process_2025	1
All_cells	All_DEGs	Cell Projection Organization (GO:0030030)	'1/19	0.242432	0.570339	3.78547	5.36413	RNASE1	GO_Biological_Process_2025	1
All_cells	All_DEGs	Regulation of Tissue Remodeling (GO:0034103)	'1/19	0.242432	0.570339	3.78547	5.36413	CST3	GO_Biological_Process_2025	1
All_cells	All_DEGs	Phosphatidylcholine Biosynthetic Process (GO:0006656)	'1/19	0.242432	0.570339	3.78547	5.36413	CEPT1	GO_Biological_Process_2025	1
All_cells	All_DEGs	piRNA Processing (GO:0034587)	'1/19	0.242432	0.570339	3.78547	5.36413	PIWIL1	GO_Biological_Process_2025	1
All_cells	All_DEGs	Positive Regulation of Cell Cycle Phase Transition (GO:1901989)	'1/19	0.242432	0.570339	3.78547	5.36413	PLCG2	GO_Biological_Process_2025	1
All_cells	All_DEGs	Detection of Mechanical Stimulus (GO:0050982)	'1/19	0.242432	0.570339	3.78547	5.36413	PIEZO2	GO_Biological_Process_2025	1
All_cells	All_DEGs	Skeletal Muscle Contraction (GO:0003009)	'1/19	0.242432	0.570339	3.78547	5.36413	MYH14	GO_Biological_Process_2025	1
All_cells	All_DEGs	Superoxide Anion Generation (GO:0042554)	'1/19	0.242432	0.570339	3.78547	5.36413	RNASE1	GO_Biological_Process_2025	1
All_cells	All_DEGs	Positive Regulation of Glycolytic Process (GO:0045821)	'1/19	0.242432	0.570339	3.78547	5.36413	SLC4A4	GO_Biological_Process_2025	1
All_cells	All_DEGs	Positive Regulation of Neutrophil Chemotaxis (GO:0090023)	'1/19	0.242432	0.570339	3.78547	5.36413	RNASE1	GO_Biological_Process_2025	1
All_cells	All_DEGs	Heme Biosynthetic Process (GO:0006783)	'1/19	0.242432	0.570339	3.78547	5.36413	ATP5IF1	GO_Biological_Process_2025	1
All_cells	All_DEGs	Positive Regulation of Purine Nucleotide Catabolic Process (GO:0033123)	'1/19	0.242432	0.570339	3.78547	5.36413	SLC4A4	GO_Biological_Process_2025	1
All_cells	All_DEGs	Immunoglobulin Mediated Immune Response (GO:0016064)	'1/19	0.242432	0.570339	3.78547	5.36413	CD81	GO_Biological_Process_2025	1
All_cells	All_DEGs	Positive Regulation of Stem Cell Differentiation (GO:2000738)	'1/19	0.242432	0.570339	3.78547	5.36413	SOX9	GO_Biological_Process_2025	1
All_cells	All_DEGs	Maintenance of Gastrointestinal Epithelium (GO:0030277)	'1/19	0.242432	0.570339	3.78547	5.36413	SOX9	GO_Biological_Process_2025	1
All_cells	All_DEGs	Maturation of 5.8S rRNA Frm Tricistronic rRNA Trnscpt (GO:0000466)	'1/19	0.242432	0.570339	3.78547	5.36413	RPS21	GO_Biological_Process_2025	1
All_cells	All_DEGs	Regulation of Behavior (GO:0050795)	'1/19	0.242432	0.570339	3.78547	5.36413	RELN	GO_Biological_Process_2025	1
All_cells	All_DEGs	Glycerophospholipid Metabolic Process (GO:0006650)	'2/65	0.242894	0.570339	2.16567	3.06471	PLA2G4C;PLCG2	GO_Biological_Process_2025	2
All_cells	All_DEGs	Cellular Response to Lipid (GO:0071396)	'5/234	0.253001	0.570339	1.49245	2.05117	PDK4;PLCG2;SOX9;HSPA1B;HSPA1A	GO_Biological_Process_2025	5
All_cells	All_DEGs	3'-UTR-mediated mRNA Stabilization (GO:0070935)	'1/20	0.253427	0.570339	3.58605	4.92249	BOLL	GO_Biological_Process_2025	1
All_cells	All_DEGs	Regulation of Collagen Biosynthetic Process (GO:0032965)	'1/20	0.253427	0.570339	3.58605	4.92249	TTF2	GO_Biological_Process_2025	1
All_cells	All_DEGs	DNA-templated Transcription Termination (GO:0006353)	'1/20	0.253427	0.570339	3.58605	4.92249	TTF2	GO_Biological_Process_2025	1
All_cells	All_DEGs	Regulation of Fatty Acid Metabolic Process (GO:0019217)	'1/20	0.253427	0.570339	3.58605	4.92249	PDK4	GO_Biological_Process_2025	1
All_cells	All_DEGs	Regulation of Fibroblast Migration (GO:0010762)	'1/20	0.253427	0.570339	3.58605	4.92249	RNASE1	GO_Biological_Process_2025	1
All_cells	All_DEGs	T Cell Mediated Immunity (GO:0002456)	'1/20	0.253427	0.570339	3.58605	4.92249	HLA-A	GO_Biological_Process_2025	1
All_cells	All_DEGs	Regulation of Meiotic Cell Cycle (GO:0051445)	'1/20	0.253427	0.570339	3.58605	4.92249	ANAPC11	GO_Biological_Process_2025	1
All_cells	All_DEGs	Reg of Mt Outer Membrane Permeabilization Inv in Apoptotic Sgnlng Pway (GO:1901028)	'1/20	0.253427	0.570339	3.58605	4.92249	HSPA1A	GO_Biological_Process_2025	1
All_cells	All_DEGs	Associative Learning (GO:0008306)	'1/20	0.253427	0.570339	3.58605	4.92249	RELN	GO_Biological_Process_2025	1
All_cells	All_DEGs	Bicarbonate Transport (GO:0015701)	'1/20	0.253427	0.570339	3.58605	4.92249	SLC4A4	GO_Biological_Process_2025	1
All_cells	All_DEGs	Oligodendrocyte Differentiation (GO:0048709)	'1/20	0.253427	0.570339	3.58605	4.92249	SOX9	GO_Biological_Process_2025	1
All_cells	All_DEGs	Cellular Response to Fatty Acid (GO:0071398)	'1/20	0.253427	0.570339	3.58605	4.92249	PDK4	GO_Biological_Process_2025	1
All_cells	All_DEGs	Cellular Response to Lectin (GO:1990858)	'1/20	0.253427	0.570339	3.58605	4.92249	PLCG2	GO_Biological_Process_2025	1
All_cells	All_DEGs	Positive Regulation of Blood Coagulation (GO:0030194)	'1/20	0.253427	0.570339	3.58605	4.92249	TTF2	GO_Biological_Process_2025	1
All_cells	All_DEGs	Stimulatory C-type Lectin Receptor Signaling Pathway (GO:0002223)	'1/20	0.253427	0.570339	3.58605	4.92249	PLCG2	GO_Biological_Process_2025	1
All_cells	All_DEGs	Endocardial Cushion Morphogenesis (GO:0003203)	'1/20	0.253427	0.570339	3.58605	4.92249	SOX9	GO_Biological_Process_2025	1
All_cells	All_DEGs	Positive Regulation of Ion Transmembrane Transporter Activity (GO:0032414)	'1/20	0.253427	0.570339	3.58605	4.92249	COX17	GO_Biological_Process_2025	1
All_cells	All_DEGs	Ganglioside Metabolic Process (GO:0001573)	'1/20	0.253427	0.570339	3.58605	4.92249	NEU3	GO_Biological_Process_2025	1
All_cells	All_DEGs	Hippo Signaling (GO:0035329)	'1/20	0.253427	0.570339	3.58605	4.92249	WWC1	GO_Biological_Process_2025	1
All_cells	All_DEGs	Hydrogen Peroxide Catabolic Process (GO:0042744)	'1/20	0.253427	0.570339	3.58605	4.92249	PXDNL	GO_Biological_Process_2025	1
All_cells	All_DEGs	Lysosomal Lumen Acidification (GO:0007042)	'1/20	0.253427	0.570339	3.58605	4.92249	RNASEK	GO_Biological_Process_2025	1
All_cells	All_DEGs	Purine Nucleotide Biosynthetic Process (GO:0006164)	'1/20	0.253427	0.570339	3.58605	4.92249	PRPS2	GO_Biological_Process_2025	1
All_cells	All_DEGs	Regulation of T Cell Cytokine Production (GO:0002724)	'1/20	0.253427	0.570339	3.58605	4.92249	HLA-A	GO_Biological_Process_2025	1
All_cells	All_DEGs	Negative Regulation of RNA Splicing (GO:0033119)	'1/20	0.253427	0.570339	3.58605	4.92249	RPS13	GO_Biological_Process_2025	1
All_cells	All_DEGs	Negative Regulation of Cell Adhesion (GO:0007162)	'2/67	0.253647	0.570339	2.09882	2.87919	CDH13;LPXN	GO_Biological_Process_2025	2
All_cells	All_DEGs	Cellular Response to Oxidative Stress (GO:0034599)	'3/121	0.25653	0.573543	1.73555	2.36123	ROMO1;HSPA1B;HSPA1A	GO_Biological_Process_2025	3
All_cells	All_DEGs	Positive Regulation of Macromolecule Biosynthetic Process (GO:0010557)	'7/355	0.257563	0.573543	1.3762	1.86681	CUX2;RPL23;PDCD5;PLCG2;SOX9;HSPA1B;HSPA1A	GO_Biological_Process_2025	7
All_cells	All_DEGs	Ras Protein Signal Transduction (GO:0007265)	'2/68	0.259028	0.573543	2.06692	2.79204	RASGEF1B;KSR2	GO_Biological_Process_2025	2
All_cells	All_DEGs	DNA Replication Initiation (GO:0006270)	'1/21	0.264263	0.573543	3.40657	4.5335	LRWD1	GO_Biological_Process_2025	1
All_cells	All_DEGs	Regulation of Epithelial Cell Differentiation (GO:0030856)	'1/21	0.264263	0.573543	3.40657	4.5335	SOX9	GO_Biological_Process_2025	1
All_cells	All_DEGs	Anaphase-Promoting Complex-Dependent Catabolic Process (GO:0031145)	'1/21	0.264263	0.573543	3.40657	4.5335	ANAPC11	GO_Biological_Process_2025	1
All_cells	All_DEGs	Regulation of Neuroinflammatory Response (GO:0150077)	'1/21	0.264263	0.573543	3.40657	4.5335	PLCG2	GO_Biological_Process_2025	1
All_cells	All_DEGs	Antigen Processing and Presentation of Endogenous Peptide Antigen (GO:0002483)	'1/21	0.264263	0.573543	3.40657	4.5335	HLA-A	GO_Biological_Process_2025	1
All_cells	All_DEGs	Peptide Cross-Linking (GO:0018149)	'1/21	0.264263	0.573543	3.40657	4.5335	COL3A1	GO_Biological_Process_2025	1
All_cells	All_DEGs	Porphyrin-Containing Compound Biosynthetic Process (GO:0006779)	'1/21	0.264263	0.573543	3.40657	4.5335	ATP5IF1	GO_Biological_Process_2025	1
All_cells	All_DEGs	Response to BMP (GO:0071772)	'1/21	0.264263	0.573543	3.40657	4.5335	SOX9	GO_Biological_Process_2025	1
All_cells	All_DEGs	Entrainment of Circadian Clock by Photoperiod (GO:0043153)	'1/21	0.264263	0.573543	3.40657	4.5335	OPN5	GO_Biological_Process_2025	1
All_cells	All_DEGs	Positive Regulation of Granulocyte Chemotaxis (GO:0071624)	'1/21	0.264263	0.573543	3.40657	4.5335	RNASE1	GO_Biological_Process_2025	1
All_cells	All_DEGs	Epithelial Cilium Movement Involved in Extracellular Fluid Movement (GO:0003351)	'1/21	0.264263	0.573543	3.40657	4.5335	SPAG6	GO_Biological_Process_2025	1
All_cells	All_DEGs	Innate Immune Response in Mucosa (GO:0002227)	'1/21	0.264263	0.573543	3.40657	4.5335	FAU	GO_Biological_Process_2025	1
All_cells	All_DEGs	Long-Term Memory (GO:0007616)	'1/21	0.264263	0.573543	3.40657	4.5335	RELN	GO_Biological_Process_2025	1
All_cells	All_DEGs	Negative Regulation of Biomineral Tissue Development (GO:0070168)	'1/21	0.264263	0.573543	3.40657	4.5335	SOX9	GO_Biological_Process_2025	1
All_cells	All_DEGs	Phospholipid Metabolic Process (GO:0006644)	'2/69	0.26441	0.573543	2.03597	2.70835	GPX4;PLA2G4C	GO_Biological_Process_2025	2
All_cells	All_DEGs	Skin Development (GO:0043588)	'2/69	0.26441	0.573543	2.03597	2.70835	RYR1;COL3A1	GO_Biological_Process_2025	2
All_cells	All_DEGs	Fatty Acid Biosynthetic Process (GO:0006633)	'2/70	0.269792	0.580702	2.00592	2.62797	GPX4;OXSM	GO_Biological_Process_2025	2
All_cells	All_DEGs	ERK1 and ERK2 Cascade (GO:0070371)	'1/22	0.274943	0.580702	3.24419	4.18888	SOX9	GO_Biological_Process_2025	1
All_cells	All_DEGs	Fc-epsilon Receptor Signaling Pathway (GO:0038095)	'1/22	0.274943	0.580702	3.24419	4.18888	PLCG2	GO_Biological_Process_2025	1
All_cells	All_DEGs	Negative Regulation of Natural Killer Cell Mediated Cytotoxicity (GO:0045953)	'1/22	0.274943	0.580702	3.24419	4.18888	HLA-A	GO_Biological_Process_2025	1
All_cells	All_DEGs	Photoperiodism (GO:0009648)	'1/22	0.274943	0.580702	3.24419	4.18888	OPN5	GO_Biological_Process_2025	1
All_cells	All_DEGs	Diacylglycerol Metabolic Process (GO:0046339)	'1/22	0.274943	0.580702	3.24419	4.18888	DGKB	GO_Biological_Process_2025	1
All_cells	All_DEGs	Positive Regulation of Epithelial Cell Differentiation (GO:0030858)	'1/22	0.274943	0.580702	3.24419	4.18888	SOX9	GO_Biological_Process_2025	1
All_cells	All_DEGs	Endocardial Cushion Development (GO:0003197)	'1/22	0.274943	0.580702	3.24419	4.18888	SOX9	GO_Biological_Process_2025	1
All_cells	All_DEGs	Thioester Metabolic Process (GO:0035383)	'1/22	0.274943	0.580702	3.24419	4.18888	OXSM	GO_Biological_Process_2025	1
All_cells	All_DEGs	Positive Regulation of Synaptic Transmission, Glutamatergic (GO:0051968)	'1/22	0.274943	0.580702	3.24419	4.18888	RELN	GO_Biological_Process_2025	1
All_cells	All_DEGs	Intracellular Protein Transmembrane Transport (GO:0065002)	'1/22	0.274943	0.580702	3.24419	4.18888	SEC61G	GO_Biological_Process_2025	1
All_cells	All_DEGs	protein-DNA Complex Disassembly (GO:0032986)	'1/22	0.274943	0.580702	3.24419	4.18888	RPL23	GO_Biological_Process_2025	1
All_cells	All_DEGs	Regulation of Anoikis (GO:2000209)	'1/22	0.274943	0.580702	3.24419	4.18888	PDK4	GO_Biological_Process_2025	1
All_cells	All_DEGs	Regulation of Biosynthetic Process (GO:0009889)	'1/22	0.274943	0.580702	3.24419	4.18888	RNASE1	GO_Biological_Process_2025	1
All_cells	All_DEGs	Positive Regulation of Proteasomal Ubiquitin-Dependent Protein Catabolic Process (GO:0032436)	'2/71	0.275174	0.580702	1.97675	2.5507	HSPA1B;HSPA1A	GO_Biological_Process_2025	2
All_cells	All_DEGs	Monoatomic Cation Transmembrane Transport (GO:0098655)	'6/304	0.279906	0.587466	1.37622	1.75234	RNASEK;CACNA1A;KCNQ5;ROMO1;SLC4A4;ATP5MF	GO_Biological_Process_2025	6
All_cells	All_DEGs	Negative Regulation of Extrinsic Apoptotic Signaling Pathway (GO:2001237)	'2/72	0.280554	0.587466	1.94841	2.47641	HSPA1B;HSPA1A	GO_Biological_Process_2025	2
All_cells	All_DEGs	RNA Biosynthetic Process (GO:0032774)	'3/128	0.283988	0.587466	1.63777	2.06167	NOVA1;TTF2;ADAD2	GO_Biological_Process_2025	3
All_cells	All_DEGs	Negative Regulation of Neuron Differentiation (GO:0045665)	'1/23	0.285468	0.587466	3.09657	3.88194	SOX9	GO_Biological_Process_2025	1
All_cells	All_DEGs	Negative Regulation of Peptidase Activity (GO:0010466)	'1/23	0.285468	0.587466	3.09657	3.88194	CST3	GO_Biological_Process_2025	1
All_cells	All_DEGs	Regulation of Neurotransmitter Receptor Activity (GO:0099601)	'1/23	0.285468	0.587466	3.09657	3.88194	RELN	GO_Biological_Process_2025	1
All_cells	All_DEGs	Phosphatidylinositol-Mediated Signaling (GO:0048015)	'1/23	0.285468	0.587466	3.09657	3.88194	PLCG2	GO_Biological_Process_2025	1
All_cells	All_DEGs	poly(A)+ mRNA Export From Nucleus (GO:0016973)	'1/23	0.285468	0.587466	3.09657	3.88194	ENY2	GO_Biological_Process_2025	1
All_cells	All_DEGs	Positive Regulation of Cell-Substrate Junction Organization (GO:0150117)	'1/23	0.285468	0.587466	3.09657	3.88194	RNASE1	GO_Biological_Process_2025	1
All_cells	All_DEGs	Positive Regulation of Lamellipodium Assembly (GO:0010592)	'1/23	0.285468	0.587466	3.09657	3.88194	RNASE1	GO_Biological_Process_2025	1
All_cells	All_DEGs	Maturation of LSU-rRNA (GO:0000470)	'1/23	0.285468	0.587466	3.09657	3.88194	RPL7A	GO_Biological_Process_2025	1
All_cells	All_DEGs	Modulation by Host of Viral Genome Replication (GO:0044827)	'1/23	0.285468	0.587466	3.09657	3.88194	EEF1A1	GO_Biological_Process_2025	1
All_cells	All_DEGs	Negative Regulation of Epithelial Cell Proliferation (GO:0050680)	'2/73	0.28593	0.587466	1.92087	2.40495	ATP5IF1;SOX9	GO_Biological_Process_2025	2
All_cells	All_DEGs	Neuropeptide Signaling Pathway (GO:0007218)	'2/73	0.28593	0.587466	1.92087	2.40495	PENK;SORCS2	GO_Biological_Process_2025	2
All_cells	All_DEGs	Positive Regulation of Cell-Substrate Adhesion (GO:0010811)	'2/73	0.28593	0.587466	1.92087	2.40495	CDH13;RNASE1	GO_Biological_Process_2025	2
All_cells	All_DEGs	Fatty Acid Metabolic Process (GO:0006631)	'3/130	0.291883	0.598641	1.61181	1.98479	GPX4;OXSM;ALKBH7	GO_Biological_Process_2025	3
All_cells	All_DEGs	Positive Regulation of NLRP3 Inflammasome Complex Assembly (GO:1900227)	'1/24	0.29584	0.602523	2.96179	3.60727	PLCG2	GO_Biological_Process_2025	1
All_cells	All_DEGs	Positive Regulation of Epidermal Growth Factor Receptor Signaling Pathway (GO:0045742)	'1/24	0.29584	0.602523	2.96179	3.60727	NEU3	GO_Biological_Process_2025	1
All_cells	All_DEGs	Positive Regulation of Morphogenesis of an Epithelium (GO:1905332)	'1/24	0.29584	0.602523	2.96179	3.60727	SOX9	GO_Biological_Process_2025	1
All_cells	All_DEGs	Purine-Containing Compound Biosynthetic Process (GO:0072522)	'1/24	0.29584	0.602523	2.96179	3.60727	PRPS2	GO_Biological_Process_2025	1
All_cells	All_DEGs	Negative Regulation of Supramolecular Fiber Organization (GO:1902904)	'2/76	0.302031	0.605382	1.84272	2.20615	PFDN5;PFDN6	GO_Biological_Process_2025	2
All_cells	All_DEGs	Transforming Growth Factor Beta Receptor Signaling Pathway (GO:0007179)	'2/76	0.302031	0.605382	1.84272	2.20615	COL3A1;LPXN	GO_Biological_Process_2025	2
All_cells	All_DEGs	Regulation of Rho Protein Signal Transduction (GO:0035023)	'2/76	0.302031	0.605382	1.84272	2.20615	COL3A1;RNASE1	GO_Biological_Process_2025	2
All_cells	All_DEGs	Negative Regulation of Intrinsic Apoptotic Signaling Pathway in Response to DNA Damage (GO:1902230)	'1/25	0.306063	0.605382	2.83824	3.36037	TAF9	GO_Biological_Process_2025	1
All_cells	All_DEGs	Negative Regulation of miRNA Transcription (GO:1902894)	'1/25	0.306063	0.605382	2.83824	3.36037	SOX9	GO_Biological_Process_2025	1
All_cells	All_DEGs	Antigen Processing and Presentation of Exogenous Peptide Antigen via MHC Class II (GO:0019886)	'1/25	0.306063	0.605382	2.83824	3.36037	CTSV	GO_Biological_Process_2025	1
All_cells	All_DEGs	Cardiac Muscle Cell Development (GO:0055013)	'1/25	0.306063	0.605382	2.83824	3.36037	OBSL1	GO_Biological_Process_2025	1
All_cells	All_DEGs	Pigment Biosynthetic Process (GO:0046148)	'1/25	0.306063	0.605382	2.83824	3.36037	ATP5IF1	GO_Biological_Process_2025	1
All_cells	All_DEGs	Response to Purine-Containing Compound (GO:0014074)	'1/25	0.306063	0.605382	2.83824	3.36037	RYR1	GO_Biological_Process_2025	1
All_cells	All_DEGs	Positive Regulation of Cilium Assembly (GO:0045724)	'1/25	0.306063	0.605382	2.83824	3.36037	PPP1R35	GO_Biological_Process_2025	1
All_cells	All_DEGs	Stress Granule Assembly (GO:0034063)	'1/25	0.306063	0.605382	2.83824	3.36037	RPS23	GO_Biological_Process_2025	1
All_cells	All_DEGs	Positive Regulation of Inflammasome-Mediated Signaling Pathway (GO:0141087)	'1/25	0.306063	0.605382	2.83824	3.36037	PLCG2	GO_Biological_Process_2025	1
All_cells	All_DEGs	Positive Regulation of Neutrophil Migration (GO:1902624)	'1/25	0.306063	0.605382	2.83824	3.36037	RNASE1	GO_Biological_Process_2025	1
All_cells	All_DEGs	Icosanoid Biosynthetic Process (GO:0046456)	'1/25	0.306063	0.605382	2.83824	3.36037	PTGDS	GO_Biological_Process_2025	1
All_cells	All_DEGs	Long-Chain Fatty Acid Biosynthetic Process (GO:0042759)	'1/25	0.306063	0.605382	2.83824	3.36037	GPX4	GO_Biological_Process_2025	1
All_cells	All_DEGs	Regulation of Biomineral Tissue Development (GO:0070167)	'1/25	0.306063	0.605382	2.83824	3.36037	SOX9	GO_Biological_Process_2025	1
All_cells	All_DEGs	Negative Regulation of Catalytic Activity (GO:0043086)	'1/25	0.306063	0.605382	2.83824	3.36037	ATP5IF1	GO_Biological_Process_2025	1
All_cells	All_DEGs	Cellular Response to Hypoxia (GO:0071456)	'2/77	0.307385	0.605801	1.81806	2.14468	EGLN3;CPEB2	GO_Biological_Process_2025	2
All_cells	All_DEGs	Cellular Response to Decreased Oxygen Levels (GO:0036294)	'2/78	0.312732	0.605801	1.79404	2.08541	EGLN3;CPEB2	GO_Biological_Process_2025	2
All_cells	All_DEGs	Receptor-Mediated Endocytosis (GO:0006898)	'3/136	0.315643	0.605801	1.53863	1.77426	RNASEK;CD81;LRP1B	GO_Biological_Process_2025	3
All_cells	All_DEGs	Regulation of Cytoplasmic Translation (GO:2000765)	'1/26	0.316138	0.605801	2.72457	3.13755	CPEB2	GO_Biological_Process_2025	1
All_cells	All_DEGs	Negative Regulation of Fatty Acid Metabolic Process (GO:0045922)	'1/26	0.316138	0.605801	2.72457	3.13755	SOX9	GO_Biological_Process_2025	1
All_cells	All_DEGs	Reg of Endoplasmic Reticulum Stress-Induced Intrinsic Apoptotic Sgnlng Pway (GO:1902235)	'1/26	0.316138	0.605801	2.72457	3.13755	HSPA1A	GO_Biological_Process_2025	1
All_cells	All_DEGs	Regulation of Fatty Acid Biosynthetic Process (GO:0042304)	'1/26	0.316138	0.605801	2.72457	3.13755	PDK4	GO_Biological_Process_2025	1
All_cells	All_DEGs	Actin Filament Polymerization (GO:0030041)	'1/26	0.316138	0.605801	2.72457	3.13755	RNASE1	GO_Biological_Process_2025	1
All_cells	All_DEGs	Regulation of Neutrophil Chemotaxis (GO:0090022)	'1/26	0.316138	0.605801	2.72457	3.13755	RNASE1	GO_Biological_Process_2025	1
All_cells	All_DEGs	Calcium Ion Import Across Plasma Membrane (GO:0098703)	'1/26	0.316138	0.605801	2.72457	3.13755	CACNA1A	GO_Biological_Process_2025	1
All_cells	All_DEGs	Cell-Cell Adhesion Mediated by Cadherin (GO:0044331)	'1/26	0.316138	0.605801	2.72457	3.13755	CDH13	GO_Biological_Process_2025	1
All_cells	All_DEGs	Cellular Response to Topologically Incorrect Protein (GO:0035967)	'1/26	0.316138	0.605801	2.72457	3.13755	HSPA1A	GO_Biological_Process_2025	1
All_cells	All_DEGs	Positive Regulation of ERBB Signaling Pathway (GO:1901186)	'1/26	0.316138	0.605801	2.72457	3.13755	NEU3	GO_Biological_Process_2025	1
All_cells	All_DEGs	Positive Regulation of Filopodium Assembly (GO:0051491)	'1/26	0.316138	0.605801	2.72457	3.13755	GPM6A	GO_Biological_Process_2025	1
All_cells	All_DEGs	Synaptic Transmission, Glutamatergic (GO:0035249)	'1/26	0.316138	0.605801	2.72457	3.13755	UNC13C	GO_Biological_Process_2025	1
All_cells	All_DEGs	Positive Regulation of Interleukin-2 Production (GO:0032743)	'1/26	0.316138	0.605801	2.72457	3.13755	PLCG2	GO_Biological_Process_2025	1
All_cells	All_DEGs	Mitotic Cell Cycle Checkpoint Signaling (GO:0007093)	'1/26	0.316138	0.605801	2.72457	3.13755	NABP1	GO_Biological_Process_2025	1
All_cells	All_DEGs	Regulation of Actin Filament Bundle Assembly (GO:0032231)	'1/26	0.316138	0.605801	2.72457	3.13755	RNASE1	GO_Biological_Process_2025	1
All_cells	All_DEGs	Regulation of Chondrocyte Differentiation (GO:0032330)	'1/26	0.316138	0.605801	2.72457	3.13755	SOX9	GO_Biological_Process_2025	1
All_cells	All_DEGs	RNA Catabolic Process (GO:0006401)	'2/79	0.318069	0.608502	1.77065	2.02826	HSPA1B;HSPA1A	GO_Biological_Process_2025	2
All_cells	All_DEGs	Negative Regulation of Programmed Cell Death (GO:0043069)	'7/382	0.318829	0.608958	1.27534	1.45784	GPX4;TAF9;NAA38;SOX9;RPL15;HSPA1B;HSPA1A	GO_Biological_Process_2025	7
All_cells	All_DEGs	Lipid Metabolic Process (GO:0006629)	'5/259	0.322833	0.611768	1.34383	1.51936	GPX4;DGKB;PLA2G4C;CEPT1;ALKBH7	GO_Biological_Process_2025	5
All_cells	All_DEGs	protein-RNA Complex Assembly (GO:0022618)	'3/138	0.323577	0.611768	1.51568	1.71017	RPS14;RPS28;FAU	GO_Biological_Process_2025	3
All_cells	All_DEGs	Negative Regulation of miRNA Metabolic Process (GO:2000629)	'1/27	0.326066	0.611768	2.61964	2.93571	SOX9	GO_Biological_Process_2025	1
All_cells	All_DEGs	Regulation of Lysosomal Lumen pH (GO:0035751)	'1/27	0.326066	0.611768	2.61964	2.93571	RNASEK	GO_Biological_Process_2025	1
All_cells	All_DEGs	Negative Regulation of Proteolysis Involved in Protein Catabolic Process (GO:1903051)	'1/27	0.326066	0.611768	2.61964	2.93571	RPL23	GO_Biological_Process_2025	1
All_cells	All_DEGs	Antigen Processing and Presentation of Peptide Antigen via MHC Class II (GO:0002495)	'1/27	0.326066	0.611768	2.61964	2.93571	CTSV	GO_Biological_Process_2025	1
All_cells	All_DEGs	Regulation of Proteolysis Involved in Protein Catabolic Process (GO:1903050)	'1/27	0.326066	0.611768	2.61964	2.93571	ATP5IF1	GO_Biological_Process_2025	1
All_cells	All_DEGs	Regulation of Reactive Oxygen Species Biosynthetic Process (GO:1903426)	'1/27	0.326066	0.611768	2.61964	2.93571	PLCG2	GO_Biological_Process_2025	1
All_cells	All_DEGs	Calcium Ion Import Into Cytosol (GO:1902656)	'1/27	0.326066	0.611768	2.61964	2.93571	CACNA1A	GO_Biological_Process_2025	1
All_cells	All_DEGs	Glycerophospholipid Catabolic Process (GO:0046475)	'1/27	0.326066	0.611768	2.61964	2.93571	PLA2G4C	GO_Biological_Process_2025	1
All_cells	All_DEGs	Protein Quality Control for Misfolded or Incompletely Synthesized Proteins (GO:0006515)	'1/27	0.326066	0.611768	2.61964	2.93571	SAYSD1	GO_Biological_Process_2025	1
All_cells	All_DEGs	Protein-Containing Complex Assembly (GO:0065003)	'6/323	0.327811	0.614053	1.29246	1.44151	GPX4;LPXN;SOX9;PFDN5;PFDN6;HSPA1A	GO_Biological_Process_2025	6
All_cells	All_DEGs	Transcription by RNA Polymerase II (GO:0006366)	'4/200	0.330076	0.616256	1.39246	1.54345	DRAP1;TAF9;TTF2;POLR2I	GO_Biological_Process_2025	4
All_cells	All_DEGs	Regulation of Glucose Metabolic Process (GO:0010906)	'1/28	0.335852	0.616256	2.52249	2.75225	PDK4	GO_Biological_Process_2025	1
All_cells	All_DEGs	Regulation of Lipid Biosynthetic Process (GO:0046890)	'1/28	0.335852	0.616256	2.52249	2.75225	PDK4	GO_Biological_Process_2025	1
All_cells	All_DEGs	Phospholipid Catabolic Process (GO:0009395)	'1/28	0.335852	0.616256	2.52249	2.75225	PLA2G4C	GO_Biological_Process_2025	1
All_cells	All_DEGs	Positive Regulation of ATP Metabolic Process (GO:1903580)	'1/28	0.335852	0.616256	2.52249	2.75225	SLC4A4	GO_Biological_Process_2025	1
All_cells	All_DEGs	Positive Regulation of G Protein-Coupled Receptor Signaling Pathway (GO:0045745)	'1/28	0.335852	0.616256	2.52249	2.75225	TTF2	GO_Biological_Process_2025	1
All_cells	All_DEGs	Positive Regulation of Microtubule Polymerization or Depolymerization (GO:0031112)	'1/28	0.335852	0.616256	2.52249	2.75225	RNASE1	GO_Biological_Process_2025	1
All_cells	All_DEGs	Hydrogen Peroxide Metabolic Process (GO:0042743)	'1/28	0.335852	0.616256	2.52249	2.75225	PXDNL	GO_Biological_Process_2025	1
All_cells	All_DEGs	Positive Regulation of Signal Transduction by P53 Class Mediator (GO:1901798)	'1/28	0.335852	0.616256	2.52249	2.75225	RPL23	GO_Biological_Process_2025	1
All_cells	All_DEGs	Inner Ear Morphogenesis (GO:0042472)	'1/28	0.335852	0.616256	2.52249	2.75225	SOX9	GO_Biological_Process_2025	1
All_cells	All_DEGs	Primary Neural Tube Formation (GO:0014020)	'1/28	0.335852	0.616256	2.52249	2.75225	CELSR1	GO_Biological_Process_2025	1
All_cells	All_DEGs	Long-Term Synaptic Potentiation (GO:0060291)	'1/28	0.335852	0.616256	2.52249	2.75225	SHANK2	GO_Biological_Process_2025	1
All_cells	All_DEGs	Mucosal Immune Response (GO:0002385)	'1/28	0.335852	0.616256	2.52249	2.75225	FAU	GO_Biological_Process_2025	1
All_cells	All_DEGs	Regulation of Interleukin-8 Production (GO:0032677)	'2/83	0.339313	0.620655	1.68287	1.8189	HSPA1B;HSPA1A	GO_Biological_Process_2025	2
All_cells	All_DEGs	Organophosphate Metabolic Process (GO:0019637)	'2/83	0.339313	0.620655	1.68287	1.8189	GPX4;PLA2G4C	GO_Biological_Process_2025	2
All_cells	All_DEGs	Positive Regulation of Synaptic Transmission (GO:0050806)	'2/84	0.344593	0.624138	1.66226	1.77096	RELN;SHANK2	GO_Biological_Process_2025	2
All_cells	All_DEGs	Regulation of Long-Term Synaptic Potentiation (GO:1900271)	'1/29	0.345495	0.624138	2.43228	2.58497	RELN	GO_Biological_Process_2025	1
All_cells	All_DEGs	Negative Regulation of Wound Healing (GO:0061045)	'1/29	0.345495	0.624138	2.43228	2.58497	TTF2	GO_Biological_Process_2025	1
All_cells	All_DEGs	Regulation of Platelet Activation (GO:0010543)	'1/29	0.345495	0.624138	2.43228	2.58497	TTF2	GO_Biological_Process_2025	1
All_cells	All_DEGs	Transcription Elongation by RNA Polymerase II (GO:0006368)	'1/29	0.345495	0.624138	2.43228	2.58497	POLR2I	GO_Biological_Process_2025	1
All_cells	All_DEGs	Tube Closure (GO:0060606)	'1/29	0.345495	0.624138	2.43228	2.58497	CELSR1	GO_Biological_Process_2025	1
All_cells	All_DEGs	Protein Localization to Cell Junction (GO:1902414)	'1/29	0.345495	0.624138	2.43228	2.58497	RELN	GO_Biological_Process_2025	1
All_cells	All_DEGs	Regulation of Blood Coagulation (GO:0030193)	'1/29	0.345495	0.624138	2.43228	2.58497	TTF2	GO_Biological_Process_2025	1
All_cells	All_DEGs	Negative Regulation of Cytokine Production Involved in Inflammatory Response (GO:1900016)	'1/30	0.354999	0.629016	2.34829	2.43198	TTF2	GO_Biological_Process_2025	1
All_cells	All_DEGs	Fc Receptor Signaling Pathway (GO:0038093)	'1/30	0.354999	0.629016	2.34829	2.43198	PLCG2	GO_Biological_Process_2025	1
All_cells	All_DEGs	Negative Regulation of Mitotic Cell Cycle (GO:0045930)	'1/30	0.354999	0.629016	2.34829	2.43198	AURKAIP1	GO_Biological_Process_2025	1
All_cells	All_DEGs	Negative Regulation of Ossification (GO:0030279)	'1/30	0.354999	0.629016	2.34829	2.43198	SOX9	GO_Biological_Process_2025	1
All_cells	All_DEGs	Negative Regulation of Response to Endoplasmic Reticulum Stress (GO:1903573)	'1/30	0.354999	0.629016	2.34829	2.43198	HSPA1A	GO_Biological_Process_2025	1
All_cells	All_DEGs	Neural Tube Closure (GO:0001843)	'1/30	0.354999	0.629016	2.34829	2.43198	CELSR1	GO_Biological_Process_2025	1
All_cells	All_DEGs	Positive Regulation of B Cell Proliferation (GO:0030890)	'1/30	0.354999	0.629016	2.34829	2.43198	CD81	GO_Biological_Process_2025	1
All_cells	All_DEGs	Positive Regulation of Interleukin-10 Production (GO:0032733)	'1/30	0.354999	0.629016	2.34829	2.43198	PLCG2	GO_Biological_Process_2025	1
All_cells	All_DEGs	Negative Regulation of Antigen Receptor-Mediated Signaling Pathway (GO:0050858)	'1/30	0.354999	0.629016	2.34829	2.43198	LPXN	GO_Biological_Process_2025	1
All_cells	All_DEGs	Negative Regulation of Wnt Signaling Pathway (GO:0030178)	'3/146	0.355284	0.629016	1.4303	1.48013	DKKL1;SOX9;PFDN5	GO_Biological_Process_2025	3
All_cells	All_DEGs	Regulation of Cell Cycle Process (GO:0010564)	'3/146	0.355284	0.629016	1.4303	1.48013	RPL23;SOX9;OBSL1	GO_Biological_Process_2025	3
All_cells	All_DEGs	Regulation of Endothelial Cell Proliferation (GO:0001936)	'2/87	0.36035	0.629016	1.60335	1.6365	ATP5IF1;CDH13	GO_Biological_Process_2025	2
All_cells	All_DEGs	Positive Regulation of Biosynthetic Process (GO:0009891)	'2/87	0.36035	0.629016	1.60335	1.6365	PLCG2;TTF2	GO_Biological_Process_2025	2
All_cells	All_DEGs	Defense Response to Gram-negative Bacterium (GO:0050829)	'2/87	0.36035	0.629016	1.60335	1.6365	ROMO1;TTF2	GO_Biological_Process_2025	2
All_cells	All_DEGs	Synapse Assembly (GO:0007416)	'2/87	0.36035	0.629016	1.60335	1.6365	GPM6A;SHANK2	GO_Biological_Process_2025	2
All_cells	All_DEGs	Regulation of Cold-Induced Thermogenesis (GO:0120161)	'3/148	0.363188	0.629016	1.41043	1.42853	NOVA1;ESRRG;KSR2	GO_Biological_Process_2025	3
All_cells	All_DEGs	acyl-CoA Metabolic Process (GO:0006637)	'1/31	0.364366	0.629016	2.2699	2.29168	OXSM	GO_Biological_Process_2025	1
All_cells	All_DEGs	Regulation of Protein Modification Process (GO:0031399)	'1/31	0.364366	0.629016	2.2699	2.29168	ROPN1	GO_Biological_Process_2025	1
All_cells	All_DEGs	Nucleoside Phosphate Metabolic Process (GO:0006753)	'1/31	0.364366	0.629016	2.2699	2.29168	OXSM	GO_Biological_Process_2025	1
All_cells	All_DEGs	Phosphatidic Acid Biosynthetic Process (GO:0006654)	'1/31	0.364366	0.629016	2.2699	2.29168	DGKB	GO_Biological_Process_2025	1
All_cells	All_DEGs	Positive Regulation of ATP-dependent Activity (GO:0032781)	'1/31	0.364366	0.629016	2.2699	2.29168	DNAJB1	GO_Biological_Process_2025	1
All_cells	All_DEGs	Positive Regulation of Lamellipodium Organization (GO:1902745)	'1/31	0.364366	0.629016	2.2699	2.29168	RNASE1	GO_Biological_Process_2025	1
All_cells	All_DEGs	Transition Metal Ion Transport (GO:0000041)	'1/31	0.364366	0.629016	2.2699	2.29168	COX17	GO_Biological_Process_2025	1
All_cells	All_DEGs	Vacuolar Acidification (GO:0007035)	'1/31	0.364366	0.629016	2.2699	2.29168	RNASEK	GO_Biological_Process_2025	1
All_cells	All_DEGs	Homologous Chromosome Pairing at Meiosis (GO:0007129)	'1/31	0.364366	0.629016	2.2699	2.29168	SYCE3	GO_Biological_Process_2025	1
All_cells	All_DEGs	Innate Immune Response Activating Cell Surface Receptor Signaling Pathway (GO:0002220)	'1/31	0.364366	0.629016	2.2699	2.29168	PLCG2	GO_Biological_Process_2025	1
All_cells	All_DEGs	Intracellular pH Reduction (GO:0051452)	'1/31	0.364366	0.629016	2.2699	2.29168	RNASEK	GO_Biological_Process_2025	1
All_cells	All_DEGs	Morphogenesis of an Epithelium (GO:0002009)	'1/31	0.364366	0.629016	2.2699	2.29168	SOX9	GO_Biological_Process_2025	1
All_cells	All_DEGs	Natural Killer Cell Mediated Immunity (GO:0002228)	'1/31	0.364366	0.629016	2.2699	2.29168	TUBB4B	GO_Biological_Process_2025	1
All_cells	All_DEGs	Negative Regulation of Blood Coagulation (GO:0030195)	'1/31	0.364366	0.629016	2.2699	2.29168	TTF2	GO_Biological_Process_2025	1
All_cells	All_DEGs	T Cell Receptor Signaling Pathway (GO:0050852)	'2/88	0.365572	0.629237	1.58463	1.5946	PLCG2;HLA-A	GO_Biological_Process_2025	2
All_cells	All_DEGs	Positive Regulation of Ubiquitin-Dependent Protein Catabolic Process (GO:2000060)	'2/88	0.365572	0.629237	1.58463	1.5946	HSPA1B;HSPA1A	GO_Biological_Process_2025	2
All_cells	All_DEGs	Cellular Response to Hormone Stimulus (GO:0032870)	'2/89	0.370778	0.630952	1.56633	1.55404	HSPA1B;HSPA1A	GO_Biological_Process_2025	2
All_cells	All_DEGs	Phosphate-Containing Compound Metabolic Process (GO:0006796)	'3/150	0.371077	0.630952	1.3911	1.37906	GPX4;PLA2G4C;ACYP1	GO_Biological_Process_2025	3
All_cells	All_DEGs	Cellular Response to Growth Factor Stimulus (GO:0071363)	'3/150	0.371077	0.630952	1.3911	1.37906	EEF1A1;PDCD5;SOX9	GO_Biological_Process_2025	3
All_cells	All_DEGs	Regulation of Lamellipodium Assembly (GO:0010591)	'1/32	0.373597	0.630952	2.19656	2.16269	RNASE1	GO_Biological_Process_2025	1
All_cells	All_DEGs	Negative Regulation of Proteasomal Ubiquitin-Dependent Protein Catabolic Process (GO:0032435)	'1/32	0.373597	0.630952	2.19656	2.16269	TAF9	GO_Biological_Process_2025	1
All_cells	All_DEGs	Positive Regulation of T Cell Mediated Cytotoxicity (GO:0001916)	'1/32	0.373597	0.630952	2.19656	2.16269	HLA-A	GO_Biological_Process_2025	1
All_cells	All_DEGs	Chondrocyte Differentiation (GO:0002062)	'1/32	0.373597	0.630952	2.19656	2.16269	SOX9	GO_Biological_Process_2025	1
All_cells	All_DEGs	Sphingolipid Catabolic Process (GO:0030149)	'1/32	0.373597	0.630952	2.19656	2.16269	NEU3	GO_Biological_Process_2025	1
All_cells	All_DEGs	Lipid Droplet Organization (GO:0034389)	'1/32	0.373597	0.630952	2.19656	2.16269	PLA2G4C	GO_Biological_Process_2025	1
All_cells	All_DEGs	Protein Localization to Golgi Apparatus (GO:0034067)	'1/32	0.373597	0.630952	2.19656	2.16269	OBSL1	GO_Biological_Process_2025	1
All_cells	All_DEGs	Membrane Depolarization (GO:0051899)	'1/32	0.373597	0.630952	2.19656	2.16269	ATP5IF1	GO_Biological_Process_2025	1
All_cells	All_DEGs	Protein Transmembrane Import Into Intracellular Organelle (GO:0044743)	'1/32	0.373597	0.630952	2.19656	2.16269	ROMO1	GO_Biological_Process_2025	1
All_cells	All_DEGs	Natural Killer Cell Mediated Cytotoxicity (GO:0042267)	'1/32	0.373597	0.630952	2.19656	2.16269	TUBB4B	GO_Biological_Process_2025	1
All_cells	All_DEGs	Calcium-Mediated Signaling (GO:0019722)	'2/91	0.381137	0.636188	1.53098	1.47678	PLCG2;KSR2	GO_Biological_Process_2025	2
All_cells	All_DEGs	Negative Regulation of Developmental Growth (GO:0048640)	'1/33	0.382694	0.636188	2.12781	2.0438	WWC1	GO_Biological_Process_2025	1
All_cells	All_DEGs	B Cell Receptor Signaling Pathway (GO:0050853)	'1/33	0.382694	0.636188	2.12781	2.0438	PLCG2	GO_Biological_Process_2025	1
All_cells	All_DEGs	Regulation of Small Molecule Metabolic Process (GO:0062012)	'1/33	0.382694	0.636188	2.12781	2.0438	PDK4	GO_Biological_Process_2025	1
All_cells	All_DEGs	Rescue of Stalled Ribosome (GO:0072344)	'1/33	0.382694	0.636188	2.12781	2.0438	SAYSD1	GO_Biological_Process_2025	1
All_cells	All_DEGs	Cortical Cytoskeleton Organization (GO:0030865)	'1/33	0.382694	0.636188	2.12781	2.0438	RNASE1	GO_Biological_Process_2025	1
All_cells	All_DEGs	Positive Regulation of Interleukin-12 Production (GO:0032735)	'1/33	0.382694	0.636188	2.12781	2.0438	PLCG2	GO_Biological_Process_2025	1
All_cells	All_DEGs	Heme Metabolic Process (GO:0042168)	'1/33	0.382694	0.636188	2.12781	2.0438	ATP5IF1	GO_Biological_Process_2025	1
All_cells	All_DEGs	Protein Localization to Chromatin (GO:0071168)	'1/33	0.382694	0.636188	2.12781	2.0438	LRWD1	GO_Biological_Process_2025	1
All_cells	All_DEGs	Negative Regulation of G2/M Transition of Mitotic Cell Cycle (GO:0010972)	'1/33	0.382694	0.636188	2.12781	2.0438	NABP1	GO_Biological_Process_2025	1
All_cells	All_DEGs	Regulation of calcineurin-NFAT Signaling Cascade (GO:0070884)	'1/33	0.382694	0.636188	2.12781	2.0438	PLCG2	GO_Biological_Process_2025	1
All_cells	All_DEGs	Negative Regulation of Endocytosis (GO:0045806)	'1/34	0.39166	0.645551	2.06323	1.93399	RNASE1	GO_Biological_Process_2025	1
All_cells	All_DEGs	Negative Regulation of Small Molecule Metabolic Process (GO:0062014)	'1/34	0.39166	0.645551	2.06323	1.93399	DKKL1	GO_Biological_Process_2025	1
All_cells	All_DEGs	Calcium Ion Import (GO:0070509)	'1/34	0.39166	0.645551	2.06323	1.93399	CACNA1A	GO_Biological_Process_2025	1
All_cells	All_DEGs	Positive Regulation of Carbohydrate Metabolic Process (GO:0045913)	'1/34	0.39166	0.645551	2.06323	1.93399	SLC4A4	GO_Biological_Process_2025	1
All_cells	All_DEGs	Membrane Protein Proteolysis (GO:0033619)	'1/34	0.39166	0.645551	2.06323	1.93399	APH1B	GO_Biological_Process_2025	1
All_cells	All_DEGs	Mitochondrial Electron Transport, NADH to Ubiquinone (GO:0006120)	'1/34	0.39166	0.645551	2.06323	1.93399	NDUFB4	GO_Biological_Process_2025	1
All_cells	All_DEGs	Nervous System Development (GO:0007399)	'8/480	0.395171	0.645551	1.15627	1.07352	GPM6A;RBFOX1;MARCKSL1;RNF103;RELN;RBFOX3;CELSR1;SHANK2	GO_Biological_Process_2025	8
All_cells	All_DEGs	Regulation of Small GTPase Mediated Signal Transduction (GO:0051056)	'3/157	0.39853	0.645551	1.32739	1.22116	PLEKHG4;RELN;ARHGAP15	GO_Biological_Process_2025	3
All_cells	All_DEGs	Defense Response to Bacterium (GO:0042742)	'4/221	0.399046	0.645551	1.25636	1.15419	ROMO1;HLA-A;FAU;RNASE1	GO_Biological_Process_2025	4
All_cells	All_DEGs	NADH Dehydrogenase Complex Assembly (GO:0010257)	'1/35	0.400496	0.645551	2.00244	1.83234	NDUFAF3	GO_Biological_Process_2025	1
All_cells	All_DEGs	Negative Regulation of Osteoblast Differentiation (GO:0045668)	'1/35	0.400496	0.645551	2.00244	1.83234	SOX9	GO_Biological_Process_2025	1
All_cells	All_DEGs	Adherens Junction Organization (GO:0034332)	'1/35	0.400496	0.645551	2.00244	1.83234	CDH13	GO_Biological_Process_2025	1
All_cells	All_DEGs	Regulation of Mitochondrial Membrane Potential (GO:0051881)	'1/35	0.400496	0.645551	2.00244	1.83234	ATP5IF1	GO_Biological_Process_2025	1
All_cells	All_DEGs	Regulation of Neuronal Synaptic Plasticity (GO:0048168)	'1/35	0.400496	0.645551	2.00244	1.83234	SHISA9	GO_Biological_Process_2025	1
All_cells	All_DEGs	Skeletal Muscle Organ Development (GO:0060538)	'1/35	0.400496	0.645551	2.00244	1.83234	MYH14	GO_Biological_Process_2025	1
All_cells	All_DEGs	Toll-Like Receptor Signaling Pathway (GO:0002224)	'1/35	0.400496	0.645551	2.00244	1.83234	PLCG2	GO_Biological_Process_2025	1
All_cells	All_DEGs	Positive Regulation of Substrate Adhesion-Dependent Cell Spreading (GO:1900026)	'1/35	0.400496	0.645551	2.00244	1.83234	RNASE1	GO_Biological_Process_2025	1
All_cells	All_DEGs	Positive Regulation of Synapse Assembly (GO:0051965)	'1/35	0.400496	0.645551	2.00244	1.83234	CUX2	GO_Biological_Process_2025	1
All_cells	All_DEGs	Macrophage Activation (GO:0042116)	'1/35	0.400496	0.645551	2.00244	1.83234	PLCG2	GO_Biological_Process_2025	1
All_cells	All_DEGs	Protein Localization to Lysosome (GO:0061462)	'1/35	0.400496	0.645551	2.00244	1.83234	CD81	GO_Biological_Process_2025	1
All_cells	All_DEGs	Mitochondrial Respiratory Chain Complex I Assembly (GO:0032981)	'1/35	0.400496	0.645551	2.00244	1.83234	NDUFAF3	GO_Biological_Process_2025	1
All_cells	All_DEGs	Regulation of T Cell Mediated Cytotoxicity (GO:0001914)	'1/35	0.400496	0.645551	2.00244	1.83234	HLA-A	GO_Biological_Process_2025	1
All_cells	All_DEGs	Response to Calcium Ion (GO:0051592)	'2/95	0.401633	0.64649	1.46483	1.33624	RYR1;PLCG2	GO_Biological_Process_2025	2
All_cells	All_DEGs	Regulation of Actin Filament-Based Process (GO:0032970)	'2/96	0.406707	0.651488	1.44917	1.30376	CELSR1;RNASE1	GO_Biological_Process_2025	2
All_cells	All_DEGs	Phosphatidic Acid Metabolic Process (GO:0046473)	'1/36	0.409204	0.651488	1.94513	1.73806	DGKB	GO_Biological_Process_2025	1
All_cells	All_DEGs	Cellular Response to Amyloid-Beta (GO:1904646)	'1/36	0.409204	0.651488	1.94513	1.73806	CACNA1A	GO_Biological_Process_2025	1
All_cells	All_DEGs	Regulatory ncRNA Processing (GO:0070918)	'1/36	0.409204	0.651488	1.94513	1.73806	PIWIL1	GO_Biological_Process_2025	1
All_cells	All_DEGs	Positive Regulation of RNA Splicing (GO:0033120)	'1/36	0.409204	0.651488	1.94513	1.73806	HSPA1A	GO_Biological_Process_2025	1
All_cells	All_DEGs	Positive Regulation of Immune Effector Process (GO:0002699)	'1/36	0.409204	0.651488	1.94513	1.73806	CD81	GO_Biological_Process_2025	1
All_cells	All_DEGs	Positive Regulation of Release of Sequestered Calcium Ion Into Cytosol (GO:0051281)	'1/36	0.409204	0.651488	1.94513	1.73806	TTF2	GO_Biological_Process_2025	1
All_cells	All_DEGs	Negative Regulation of Cell Cycle Process (GO:0010948)	'1/36	0.409204	0.651488	1.94513	1.73806	AURKAIP1	GO_Biological_Process_2025	1
All_cells	All_DEGs	RNA Processing (GO:0006396)	'5/291	0.414562	0.657971	1.19151	1.04916	RPS17;RPS28;RPS16;NOVA1;ADAD2	GO_Biological_Process_2025	5
All_cells	All_DEGs	Positive Regulation of Proteasomal Protein Catabolic Process (GO:1901800)	'2/98	0.416793	0.657971	1.41884	1.24172	HSPA1B;HSPA1A	GO_Biological_Process_2025	2
[truncated: 9,874 more rows]
