# Supplementary material for: SARS-CoV-2 infection reduces the number of spermatogonial stem cells and dysregulates the transcriptional landscape of the human testis
Source: Research Square preprint supplement (doi:10.21203/rs.3.rs-9371895/v1), 2026-04-21
Supplement: Supplementary file 5 [file 584d5649d2da08e87fdcd705.docx]

**Supplementary table 3. Histological characterization of fatal testis tissue**

| **Experiment** | **COVID-19 samples** | **Control samples** |
| --- | --- | --- |
| Cell counts (DAPI staining) | median = 110 cells/tubule | median = 159.5 cells/tubule |
| IQR 75-156 | IQR 104-241 |
| Johnsen score | median = 6 | median = 8 |
| IQR 4-7.25 | IQR 7-8 |
| PARP1 positive cells/tubule | median = 4 cells/tubule | median = 2 cells/tubule |
| IQR 1-10 | IQR 0-7 |
| % PARP1 positive cells/tubule | 5.7% intratubular cells | 2.8% intratubular cells |
| TUNEL positive cells /tubule | median = 5 cells/tubule | median = 5 cells/tubule |
| IQR 1-16 | IQR 1-14 |
| % TUNEL positive cells/tubule | 8.2% intratubular cells | 4.24% intratubular cells |
| CD3 positive cells/intertubular space | median = 7 cells/intertubular space | median = 2 cells/intertubular space |
| IQR 3-14 | IQR 1-5 |
| % CD3 positive cells/intertubular space | 23.7% interstitial cells | 9.1% interstitial cells |
| CD68 positive cells/intertubular space | median = 3 cells/intertubular space | median = 1 cell/intertubular space |
| IQR 1-6 | IQR 1-3 |
| % CD68 positive cells/intertubular space | 11.8% interstitial cells | 4.6% interstitial cells |
| SOX9 positive cells/tubule | mean = 24.22 cell/tubule | mean = 29.77 cells/tubule |
| standard deviation = 14.69 | standard deviation = 15.56 |
| SOX9 - gH2AX positive cells/tubule | median = 1 cell/tubule | median = 1 cell/tubule |
| IQR 0-2 | IQR 0-2 |
| %SOX9-gH2AX positive cells/tubule | 8.36% Sertoli cells | 4.34% Sertoli cells |
| SOX9 - TUNEL positive cells/tubule | mean = 1.25 | mean = 0.28 |
| standard deviation = 0.91 | standard deviation = 2.71 |
| %SOX9-TUNEL positive cells/tubule | 9.2% Sertoli cells | 1.1% Sertoli cells |
| UTF1 positive cells/tubule | median = 13 cells/tubule | median = 18 cells/tubule |
| IQR 8-20 | IQR 12-28 |
| UTF1 - gH2AX positive cells/tubule | median = 1 cell/tubule | median = 0 cell/tubule |
| IQR 0-2 | IQR 0-1 |
| %UTF1-gH2AX positive cells/tubule | 14.4% SSCs | 4.3% SSCs |
| UTF1 - TUNEL positive cells/tubule | median = 0 cell/tubule | median = 0 cell/tubule |
| IQR 0-1 | IQR 0-1 |
| %UTF1-TUNEL positive cells/tubule | 11.3% SSCs | 4% SSCs |
