# Supplementary material for: SARS-CoV-2 infection reduces the number of spermatogonial stem cells and dysregulates the transcriptional landscape of the human testis
Source: Research Square preprint supplement (doi:10.21203/rs.3.rs-9371895/v1), 2026-04-21
Supplement: Supplementary file 6 [file 5f6e077746084e95d2448d37.docx]

**Supplementary Table 16. RNAscope Probes**

| **RNAscope probe** | **Catalog #** |
| --- | --- |
| miRNAscope™ Positive Control Probe - SR-RNU6-S1 | 727871-S1 |
| miRNAscope™ Negative Control Probe - SR-Scramble-S1 | 727881-S1 |
| miRNAscope™ Probe - SR-hsa-miR-924-S1,MIMAT0004974 | 1297051-S1 |
| miRNAscope™ Probe - SR-hsa-miR-202-3p-S1,MIMAT0002811 | 1297061-S1 |
| RNAscope® 3-plex Negative Control Probe - RNAscope® Negative control probe DapB (of Bacillus subtilis strain) for RNAscope® Multiplex Fluorescent Assay. | 320871 |
| RNAscope® 3-plex Positive Control Probe - Hs - RNAscope® Human positive control probe for RNAscope® Multiplex Fluorescent Assay- Polr2a (C1 channel) and PPIB (C2 channel), UBC (C3 channel) | 320861 |
| RNAscope® Probe - Hs-LRP1B-C1,Homo sapiens LDL receptor related protein 1B (LRP1B) mRNA | 1297021-C1 |
| RNAscope® Probe - Hs-PLCG2-C2 - Homo sapiens phospholipase C gamma 2 (PLCG2) mRNA | 506781-C2 |
| RNAscope® Probe - Hs-RBAKDN-O1-C1,Homo sapiens RBAK downstream neighbor (RBAKDN) long non-coding RNA | 1297041-C1 |
| RNAscope® Probe - Hs-RBAK-C2,Homo sapiens RB associated KRAB zinc finger (RBAK) transcript variant 1 mRNA | 1297071-C2 |
| RNAscope® Probe - Hs-ERBB4 - Homo sapiens v-erb-b2 avian erythroblastic leukemia viral oncogene homolog 4 (ERBB4) transcript variant JM-a/CVT-2 mRNA | 407831 |
| RNAscope® Probe - Hs-ERV3-1-C1,Homo sapiens endogenous retrovirus group 3 member 1 envelope (ERV3-1) transcript variant 1 mRNA | 1122521-C1 |
