# Supplementary material for: SARS-CoV-2 infection reduces the number of spermatogonial stem cells and dysregulates the transcriptional landscape of the human testis
Source: Research Square preprint supplement (doi:10.21203/rs.3.rs-9371895/v1), 2026-04-21
Supplement: Supplementary file 7 [file 640af858a55aac1d8c28f05a.docx]

**Supplementary Table 11. Histological characterization of testis tissue from recovered patients**

| **Experiment** | **COVID-19 samples** | **Control samples** |
| --- | --- | --- |
| Johnsen score | median = 5 | median = 6 |
| IQR 2-7 | IQR 3-8 |
| SOX9 positive cells/tubule | median = 15 cells/tubule | median = 19 cells/tubule |
| IQR 10.25-21 | IQR 13-25 |
| SOX9 - gH2AX positive cells/tubule | median = 1 cells/tubule | median = 0 cells/tubule |
| IQR 0-2 | IQR 0-2 |
| %SOX9-gH2AX positive cells/tubule | 7.78% Sertoli cells | 2.76% Sertoli cells |
| UTF1 positive cells/tubule | median = 1 cell/tubule | median = 2 cells/tubule |
| IQR 0-2 | IQR 1-4 |
| UTF1 - gH2AX positive cells/tubule | median = 0 cell/tubule | median = 0 cell/tubule |
| IQR 0-1 | IQR 0-0 |
| %UTF1-gH2AX positive cells/tubule | 22.08% spermatogonia | 11.07% spermatogonia |
