# Supplementary material for: SARS-CoV-2 infection reduces the number of spermatogonial stem cells and dysregulates the transcriptional landscape of the human testis
Source: Research Square preprint supplement (doi:10.21203/rs.3.rs-9371895/v1), 2026-04-21
Supplement: Supplementary file 8 [file 733891674f9779cee17a5305.docx]

**Supplementary table 1. Sample summary main analysis**

| **Sample** | **Type** | **Origin** | **Age** | **B.M.I** | **Comorbidities** | **Fertility confirmed (children)** | **Disease duration (days)** | **Fever** | **Cause of death** | **Date of death** |
| --- | --- | --- | --- | --- | --- | --- | --- | --- | --- | --- |
| 2043B | Control | U.S. | 25-35 | - | - | No | *N/A* | *N/A* | Gunshot wound | 2011-2014 |
| 3872A | Control | U.S. | 50 | - | - | Yes | *N/A* | *N/A* | Motor vehicle accident | 2011-2014 |
| 2460A | Control | U.S. | 60-65 | - | - | No | *N/A* | *N/A* | Anoxia | 2011-2014 |
| 2568 | Control | U.S. | 50-60 | - | - | - | - | - | Motor vehicular accident | 08/01/2013 |
| 2023A | Control | U.S. | 50-59 | - | - | - | - | - | Cerebrovascular accident | 18/12/2009 |
| 2029A | Control | U.S. | 60-69 | - | - | - | - | - | Cerebrovascular accident | 15/10/2011 |
| 2040A | Control | U.S. | 50-59 | - | - | - | - | - | Cerebrovascular accident | 18/11/2011 |
| 2049A | Control | U.S. | 50-59 | - | - | - | - | - | Cerebrovascular accident | 30/11/2011 |
| 2066A | Control | U.S. | 50-59 | - | - | - | - | - | Anoxia | 11/12/2011 |
| 2459A | Control | U.S. | 60-65 | - | - | - | - | - | Anoxia | 2012 |
| 2647A | Control | U.S. | 50-60 | - | - | - | - | - | Cerebrovascular accident | 22/04/2013 |
| 2840A | Control | U.S. | 50-60 | - | - | - | - | - | Anoxia | 08/09/2013 |
| 2932C | Control | U.S. | 60 | - | - | - | - | - | Cerebrovascular accident | 30/10/2013 |
| Testis Human | Control | U.S. | 55 | - |  |  |  |  | Anoxia; cardiac arrest | 2021 |
| A2-C21027_12 | Control | Spain | 64 | - | - | - | *N/A* | - | Cardiogenic shock | - |
| A2-C21027_16 | Control | Spain | 54 | - | - | - | *N/A* | - | Sudden cardiac arrest | - |
| A2-C21027_17 | Control | Spain | 65 | - | - | - | *N/A* | - | Ventricular fibrillation | - |
| A2-C21027_19 | Control | Spain | 66 | - | - | - | *N/A* | - | - | - |
| A2-C21027_21 | Control | Spain | 57 | - | - | - | *N/A* | - | Ischemic stroke | - |
| 03BTP210001 | Control | Spain | 15 | - | - | No | *N/A* | - | - | - |
| B03-8544 F | Control | Spain | 32 | - | - | - | *N/A* | - | - | - |
| B03-11051 C1 | Control | Spain | 78 | - | Benign adenomatoid tumor | - | *N/A* | - | - | - |
| A17-038 | Control | Spain | 74 | - | Overweight, hypertension, DLP, DM and moderate kidney failure | - | *N/A* | No | Ascending thoracic aortic pseudoaneurysm | 04/07/2017 |
| A18-031 | Control | Spain | 71 | - | High blood pressure, diabetes mellitus, polypous sinusitis, kidney stones with renal colic | - | *N/A* | No | Acromegaly, arterial rupture | 20/05/2018 |
| A18-035 | Control | Spain | 47 | - | Obesity and dyslipidemia | - | *N/A* | No | Acute myocardial infarction | 15/06/2018 |
| 20038867 | COVID-19 | U.S. | 26 | 38 | Mild pericarditis with adhesions, hypertension, hepatic stenosis, obesity | - | <7 | - | Diffuse alveolar damage of the lungs (ARDS) | July 2020 |
| #3 | COVID-19 | Brazil | 56 | 32.6 | Hypertension, diabetes, obesity | Yes | 31 | Yes  38.4˚C  >24hs | Septic shock | January-March 2021 |
| #4 | COVID-19 | Brazil | 56 | 26.1 | Hypertension, diabetes, obesity, hypothyroidism | Yes | 26 | Yes  39.3˚C  >24hs | Multiple organ failure | January-March 2021 |
| 200145227 | COVID-19 | U.S. | 77 | 31.8 | Hypertension, remote deep vein thrombosis, remote splenectomy, remote pancreatitis due to cholelithiasis, osteoarthritis, rash over the knees, obesity. | - | 6 | Yes | Cardiac arrest | March 2020 |
| 03BTP210004 | COVID-19 | Spain | 68 | - | Hypertension, Ictus with hemiparesis and aphasia, chronic kidney disease secondary to nephroangiosclerosis.  Kidney transplant with acute humoral rejection and nephrectomy. Second kidney transplant followed with acute tubular necrosis. Diffuse encephalopathy and subacute hemorrhage, tubular adenoma in colon, Influenza A with pneumonia. | No | 33 | Yes | Acute bilateral pneumonia with acute respiratory distress syndrome. Possible pulmonary embolism. | May 2020 |
| 03BTP210005 | COVID-19 | Spain | 74 | - | Dyslipidemia (Type II Diabetes), Resected epithelioma in frontal region, complete diabetic mononeuropathy III cranial nerve, nasal polypectomy and nasal septoplasty | Yes | 49 | Yes | Severe respiratory distress secondary to viral SARS-CoV-2 pneumonia | May 2020 |
| 03BTP210006 | COVID-19 | Spain | 72 | - | Stage IV mantle cell lymphoma with gastric affectation, Gleason 8 prostate adenocarcinoma. | Yes | - | Yes | Acute respiratory distress syndrome secondary to viral pneumonia. Pulmonary barotrauma with pneumothorax and pneumomediastinum. Hemothorax without active bleeding. Pulmonary embolism. | June 2020 |
| #5 | COVID-19 | Brazil | 88 | 30.4 | Hypertension, diabetes, Hypothyroidism, chronic renal insufficiency | Yes | 13 | Yes  40.2˚C | Multiple organ failure | January-March 2021 |
| TX200158TU1PF1CR | COVID-19 | Spain | 75 | - | Hypertension, chronic pulmonary disease. | - | 79 | No | Septic shock for pseudomembranous colitis | 2020 |
| TX200211TU1PF1CR | COVID-19 | Spain | 86 | - | Hypertension and diabetes | Yes | 16 | Yes | Septic shock for suppurative cholangitis. | 2020 |
| TX200235TU1PF1CR | COVID-19 | Spain | 79 | - | - | - | 11 | Yes | Diffuse alveolar damage-induced respiratory insufficiency. | 2020 |
| TX200251TU1PF1CR | COVID-19 | Spain | 70 | - | Hypertension, chronic pulmonary disease, diabetes, obesity, acute chronic kidney disease. | Yes | 19 | Yes | Intestinal ischemia, pulmonary embolism in the left pulmonary artery. | 2020 |
| TX200330TU1PF1CR | COVID-19 | Spain | 62 | - | Bilateral lung transplant, chronic pulmonary disease | - | 26 | Yes | Diffuse alveolar damage-induced respiratory insufficiency, fibrosis, pneumonia for herpes virus and cytomegalovirus. | 2020 |
| TX200348TU1PF1CR | COVID-19 | Spain | 67 | - | Obesity | - | 23 | Yes | Diffuse alveolar damage-induced respiratory insufficiency, severe pulmonary asbestosis | 2020 |
| TX200406TU1PF1CR | COVID-19 | Spain | 65 | - | Hypertension, diabetes, solid neoplasm. | - | 7 | No | Diffuse alveolar damage-induced respiratory insufficiency, acute bilateral bronchopneumonia. | 2020- |
| TX200465TU1PF1CR | COVID-19 | Spain | 66 | - | Hypertension, obesity, chronic pulmonary disease | - | 37 | No | Respiratory insufficiency for severe pulmonary edema. | 2020 |
| TX210008TU1PF1CR | COVID-19 | Spain | 77 | - | Hypertension, dyslipidemia, diabetes, larynx epidermoid carcinoma, | Yes | 26 | Yes | Diffuse alveolar damage-induced respiratory insufficiency, acute fibrinoid pneumonia. | 2021 |
| A2-C21027_01 | COVID-19 | Spain | 78 | - | - | - | - | - | - | - |
| A2-C21027_02 | COVID-19 | Spain | 68 | - | - | - | - | - | - | - |
| A2-C21027_03 | COVID-19 | Spain | 76 | - | - | - | - | - | - | - |
| A2-C21027_04 | COVID-19 | Spain | 83 | - | - | - | - | - | - | - |
| A2-C21027_05 | COVID-19 | Spain | 62 | - | - | - | - | - | - | - |
| A2-C21027_06 | COVID-19 | Spain | 75 | - | - | - | - | - | - | - |
| A2-C21027_07 | COVID-19 | Spain | 66 | - | - | - | - | - | - | - |
| A2-C21027_08 | COVID-19 | Spain | 69 | - | - | - | - | - | - | - |
| A2-C21027_09 | COVID-19 | Spain | 78 | - | - | - | - | - | - | - |
| A2-C21027_10 | COVID-19 | Spain | 72 | - | - | - | - | - | - | - |
| A2-C21027_11 | COVID-19 | Spain | 72 | - | - | - | - | - | - | - |
