# Supplementary material for: SARS-CoV-2 infection reduces the number of spermatogonial stem cells and dysregulates the transcriptional landscape of the human testis
Source: Research Square preprint supplement (doi:10.21203/rs.3.rs-9371895/v1), 2026-04-21
Supplement: Supplementary file 9 [file 75e11e5ca34cb9370d24efea.xlsx]

## Sheet: S.T. 7a. DEG_master
Comparison	genes	group
Testis_Parenchyma	SPRY4-AS1	both up
Testis_Parenchyma	MYO5C	both up
Testis_Parenchyma	ARSG	both up
Testis_Parenchyma	SHISA9	both up
Testis_Parenchyma	LINC00499	both up
Testis_Parenchyma	SUSD1	both up
Testis_Parenchyma	ST6GAL1	both up
Testis_Parenchyma	PCDH15	both up
Testis_Parenchyma	MMD2	both up
Testis_Parenchyma	AC013652.1	both up
Testis_Parenchyma	LUZP2	both up
Testis_Parenchyma	LINC00276	both up
Testis_Parenchyma	OPCML	both up
Testis_Parenchyma	SORBS2	both up
Testis_Parenchyma	NOS1	both up
Testis_Parenchyma	FRMD4A	both up
Testis_Parenchyma	MROH8	both up
Testis_Parenchyma	RYR1	both up
Testis_Parenchyma	AC068587.4	both up
Testis_Parenchyma	CUX2	both up
Testis_Parenchyma	AL008633.1	both up
Testis_Parenchyma	ABCA1	both up
Testis_Parenchyma	KCNMB2	both up
Testis_Parenchyma	TMEM241	both up
Testis_Parenchyma	RFLNA	both up
Testis_Parenchyma	GSG1L	both up
Testis_Parenchyma	KCNH5	both up
Testis_Parenchyma	AC002460.2	both up
Testis_Parenchyma	GRM7	both up
Testis_Parenchyma	PTPRT	both up
Testis_Parenchyma	DLGAP4	both up
Testis_Parenchyma	UBASH3B	both up
Testis_Parenchyma	LINC01322	both up
Testis_Parenchyma	TMEM132D	both up
Testis_Parenchyma	PHACTR1	both up
Testis_Parenchyma	OIP5-AS1	both down
Testis_Parenchyma	YWHAB	both down
Testis_Parenchyma	RETREG2	both down
Testis_Parenchyma	ARPC5	both down
Testis_Parenchyma	AIDA	both down
Testis_Parenchyma	CALM3	both down
Testis_Parenchyma	UBA52	both down
Testis_Parenchyma	NCAM2	both down
Testis_Parenchyma	PTOV1	both down
Testis_Parenchyma	C5orf24	both down
Testis_Parenchyma	MT-CO3	both down
Testis_Parenchyma	STMN1	both down
Testis_Parenchyma	VAMP2	both down
Testis_Parenchyma	TUBB4B	both down
Testis_Parenchyma	PEBP1	both down
Testis_Parenchyma	SVIP	both down
Testis_Parenchyma	C4orf48	both down
Testis_Parenchyma	MT-ATP6	both down
Testis_Parenchyma	NORAD	both down
Testis_Parenchyma	MT-ND1	both down
Testis_Parenchyma	MIF	both down
Testis_Parenchyma	LHFPL3	both up but down in flu
Testis_Parenchyma	ALK	both up but down in flu
Testis_ChoroidPlexus	SLC4A4	both up
Testis_ChoroidPlexus	CLMP	both up
Testis_ChoroidPlexus	SLIT3	both up
Testis_ChoroidPlexus	MAP1B	both up
Testis_ChoroidPlexus	EYA2	both up
Testis_ChoroidPlexus	LIMA1	both up
Testis_ChoroidPlexus	SLC24A3	both up
Testis_ChoroidPlexus	C8orf34	both up
Testis_ChoroidPlexus	NRG1	both up
Testis_ChoroidPlexus	AC002460.2	both up
Testis_ChoroidPlexus	PLCB1	both up
Testis_ChoroidPlexus	MT-ND6	both up
Testis_ChoroidPlexus	CHD3	both up
Testis_ChoroidPlexus	DAB1	both up
Testis_ChoroidPlexus	PRPF38B	both up
Testis_ChoroidPlexus	SNRPN	both up
Testis_ChoroidPlexus	TRA2A	both down
Testis_ChoroidPlexus	WDR27	both down
Testis_ChoroidPlexus	MPC1	both down
Testis_ChoroidPlexus	SMOC2	both down
Testis_ChoroidPlexus	BTG4	both down
Testis_ChoroidPlexus	LRP1B	both up but down in flu
Testis_ChoroidPlexus	RBFOX1	both up but down in flu
Testis_ChoroidPlexus	OSMR-AS1	both up but down in flu
Testis_ChoroidPlexus	PRKAG2	both up but down in flu
Testis_ChoroidPlexus	NALCN	both up but down in flu

## Sheet: S.T. 7b. GO enrichment
Comparison	Analysis	Term	Overlap	P.value	Adjusted.P.value	Old.P.value	Old.Adjusted.P.value	Odds.Ratio	Combined.Score	Genes	dbs	GeneCount
Testis_vs_ChoroidPlexus	All_genes	Sodium Ion Transmembrane Transport (GO:0035725)	'3/87	0.000192269	0.0277632	0	0	30.8851	264.272	SLC24A3;SLC4A4;NALCN	GO_Biological_Process_2025	3
Testis_vs_ChoroidPlexus	All_genes	Sodium Ion Transport (GO:0006814)	'3/96	0.000257175	0.0277632	0	0	27.8836	230.479	SLC24A3;SLC4A4;NALCN	GO_Biological_Process_2025	3
Testis_vs_ChoroidPlexus	All_genes	Axon Extension (GO:0048675)	'2/21	0.000336109	0.0277632	0	0	87.5219	700.007	MAP1B;SLIT3	GO_Biological_Process_2025	2
Testis_vs_ChoroidPlexus	All_genes	Negative Regulation of Extrinsic Apoptotic Signaling Pathway in Absence of Ligand (GO:2001240)	'2/24	0.000440686	0.0277632	0	0	75.5758	583.987	EYA2;NRG1	GO_Biological_Process_2025	2
Testis_vs_ChoroidPlexus	All_genes	Negative Regulation of Signal Transduction in Absence of Ligand (GO:1901099)	'2/24	0.000440686	0.0277632	0	0	75.5758	583.987	EYA2;NRG1	GO_Biological_Process_2025	2
Testis_vs_ChoroidPlexus	All_genes	Regulation of Extrinsic Apoptotic Signaling Pathway in Absence of Ligand (GO:2001239)	'2/28	0.000601623	0.0315852	0	0	63.9359	474.141	EYA2;NRG1	GO_Biological_Process_2025	2
Testis_vs_ChoroidPlexus	All_genes	Regulation of Glycolytic Process (GO:0006110)	'2/42	0.00135513	0.0609809	0	0	41.5292	274.253	PRKAG2;SLC4A4	GO_Biological_Process_2025	2
Testis_vs_ChoroidPlexus	All_genes	Regulation of Cell Growth (GO:0001558)	'3/222	0.00290535	0.0704494	0	0	11.7659	68.7272	PRPF38B;SLIT3;NRG1	GO_Biological_Process_2025	3
Testis_vs_ChoroidPlexus	All_genes	Negative Regulation of Extrinsic Apoptotic Signaling Pathway (GO:2001237)	'2/72	0.0039278	0.0704494	0	0	23.6952	131.264	EYA2;NRG1	GO_Biological_Process_2025	2
Testis_vs_ChoroidPlexus	All_genes	Positive Regulation of Growth (GO:0045927)	'2/79	0.00470824	0.0704494	0	0	21.5335	115.386	NRG1;PLCB1	GO_Biological_Process_2025	2
Testis_vs_ChoroidPlexus	All_genes	Vascular Transport (GO:0010232)	'2/84	0.00530598	0.0704494	0	0	20.2154	105.907	SLC24A3;SLC4A4	GO_Biological_Process_2025	2
Testis_vs_ChoroidPlexus	All_genes	Transport Across Blood-Brain Barrier (GO:0150104)	'2/86	0.00555436	0.0704494	0	0	19.7321	102.472	SLC24A3;SLC4A4	GO_Biological_Process_2025	2
Testis_vs_ChoroidPlexus	All_genes	Calcium Ion Transmembrane Transport (GO:0070588)	'2/87	0.00568053	0.0704494	0	0	19.499	100.824	SLC24A3;NALCN	GO_Biological_Process_2025	2
Testis_vs_ChoroidPlexus	All_genes	ERBB4 Signaling Pathway (GO:0038130)	'1/5	0.00648369	0.0704494	0	0	199.7	1006.18	NRG1	GO_Biological_Process_2025	1
Testis_vs_ChoroidPlexus	All_genes	Ventricular Cardiac Muscle Cell Differentiation (GO:0055012)	'1/5	0.00648369	0.0704494	0	0	199.7	1006.18	NRG1	GO_Biological_Process_2025	1
Testis_vs_ChoroidPlexus	All_genes	Activation of Transmembrane Receptor Protein Tyrosine Kinase Activity (GO:0007171)	'1/5	0.00648369	0.0704494	0	0	199.7	1006.18	NRG1	GO_Biological_Process_2025	1
Testis_vs_ChoroidPlexus	All_genes	Negative Regulation of Synapse Assembly (GO:0051964)	'1/5	0.00648369	0.0704494	0	0	199.7	1006.18	SLIT3	GO_Biological_Process_2025	1
Testis_vs_ChoroidPlexus	All_genes	Negative Regulation of Synapse Organization (GO:1905809)	'1/5	0.00648369	0.0704494	0	0	199.7	1006.18	SLIT3	GO_Biological_Process_2025	1
Testis_vs_ChoroidPlexus	All_genes	Negative Regulation of Actin Filament Depolymerization (GO:0030835)	'1/5	0.00648369	0.0704494	0	0	199.7	1006.18	LIMA1	GO_Biological_Process_2025	1
Testis_vs_ChoroidPlexus	All_genes	Negative Regulation of Cellular Extravasation (GO:0002692)	'1/5	0.00648369	0.0704494	0	0	199.7	1006.18	PLCB1	GO_Biological_Process_2025	1
Testis_vs_ChoroidPlexus	All_genes	Negative Regulation of Chemokine-Mediated Signaling Pathway (GO:0070100)	'1/5	0.00648369	0.0704494	0	0	199.7	1006.18	SLIT3	GO_Biological_Process_2025	1
Testis_vs_ChoroidPlexus	All_genes	Monoatomic Cation Transmembrane Transport (GO:0098655)	'3/304	0.00697883	0.0704494	0	0	8.52506	42.3259	SLC24A3;SLC4A4;NALCN	GO_Biological_Process_2025	3
Testis_vs_ChoroidPlexus	All_genes	Regulation of mRNA Splicing, via Spliceosome (GO:0048024)	'2/97	0.00701388	0.0704494	0	0	17.4377	86.4887	RBFOX1;TRA2A	GO_Biological_Process_2025	2
Testis_vs_ChoroidPlexus	All_genes	Inorganic Cation Transmembrane Transport (GO:0098662)	'3/307	0.00716971	0.0704494	0	0	8.43965	41.674	SLC24A3;SLC4A4;NALCN	GO_Biological_Process_2025	3
Testis_vs_ChoroidPlexus	All_genes	Regulation of Response to Nutrient Levels (GO:0032107)	'1/6	0.00777557	0.0704494	0	0	159.752	775.878	PRKAG2	GO_Biological_Process_2025	1
Testis_vs_ChoroidPlexus	All_genes	Cardiac Muscle Cell Myoblast Differentiation (GO:0060379)	'1/6	0.00777557	0.0704494	0	0	159.752	775.878	NRG1	GO_Biological_Process_2025	1
Testis_vs_ChoroidPlexus	All_genes	Regulation of Striated Muscle Cell Differentiation (GO:0051153)	'1/6	0.00777557	0.0704494	0	0	159.752	775.878	NRG1	GO_Biological_Process_2025	1
Testis_vs_ChoroidPlexus	All_genes	Neuron Projection Extension Involved in Neuron Projection Guidance (GO:1902284)	'1/6	0.00777557	0.0704494	0	0	159.752	775.878	SLIT3	GO_Biological_Process_2025	1
Testis_vs_ChoroidPlexus	All_genes	Axon Extension Involved in Axon Guidance (GO:0048846)	'1/6	0.00777557	0.0704494	0	0	159.752	775.878	SLIT3	GO_Biological_Process_2025	1
Testis_vs_ChoroidPlexus	All_genes	Negative Regulation of Cardiac Muscle Cell Apoptotic Process (GO:0010667)	'1/6	0.00777557	0.0704494	0	0	159.752	775.878	NRG1	GO_Biological_Process_2025	1
Testis_vs_ChoroidPlexus	All_genes	Regulation of Protein Depolymerization (GO:1901879)	'1/6	0.00777557	0.0704494	0	0	159.752	775.878	MAP1B	GO_Biological_Process_2025	1
Testis_vs_ChoroidPlexus	All_genes	Positive Regulation of Fibroblast Growth Factor Receptor Signaling Pathway (GO:0045743)	'1/6	0.00777557	0.0704494	0	0	159.752	775.878	SMOC2	GO_Biological_Process_2025	1
Testis_vs_ChoroidPlexus	All_genes	Positive Regulation of DNA Metabolic Process (GO:0051054)	'2/108	0.00862828	0.0704494	0	0	15.6195	74.2349	SMOC2;EYA2	GO_Biological_Process_2025	2
Testis_vs_ChoroidPlexus	All_genes	Regulation of Resting Membrane Potential (GO:0060075)	'1/7	0.00906584	0.0704494	0	0	133.12	626.095	NALCN	GO_Biological_Process_2025	1
Testis_vs_ChoroidPlexus	All_genes	Regulation of Chemokine-Mediated Signaling Pathway (GO:0070099)	'1/7	0.00906584	0.0704494	0	0	133.12	626.095	SLIT3	GO_Biological_Process_2025	1
Testis_vs_ChoroidPlexus	All_genes	Cardioblast Differentiation (GO:0010002)	'1/8	0.0103545	0.0704494	0	0	114.097	521.462	NRG1	GO_Biological_Process_2025	1
Testis_vs_ChoroidPlexus	All_genes	Regulation of Fertilization (GO:0080154)	'1/8	0.0103545	0.0704494	0	0	114.097	521.462	PLCB1	GO_Biological_Process_2025	1
Testis_vs_ChoroidPlexus	All_genes	Ventricular Trabecula Myocardium Morphogenesis (GO:0003222)	'1/8	0.0103545	0.0704494	0	0	114.097	521.462	NRG1	GO_Biological_Process_2025	1
Testis_vs_ChoroidPlexus	All_genes	Interleukin-12-Mediated Signaling Pathway (GO:0035722)	'1/8	0.0103545	0.0704494	0	0	114.097	521.462	PLCB1	GO_Biological_Process_2025	1
Testis_vs_ChoroidPlexus	All_genes	Positive Regulation of Synaptic Transmission, GABAergic (GO:0032230)	'1/8	0.0103545	0.0704494	0	0	114.097	521.462	NALCN	GO_Biological_Process_2025	1
Testis_vs_ChoroidPlexus	All_genes	Nucleic Acid Transport (GO:0050657)	'1/8	0.0103545	0.0704494	0	0	114.097	521.462	RBFOX1	GO_Biological_Process_2025	1
Testis_vs_ChoroidPlexus	All_genes	Calcium Ion Transport (GO:0006816)	'2/126	0.0115928	0.0704494	0	0	13.3401	59.4616	SLC24A3;NALCN	GO_Biological_Process_2025	2
Testis_vs_ChoroidPlexus	All_genes	Regulation of Vascular Wound Healing (GO:0061043)	'1/9	0.0116415	0.0704494	0	0	99.83	444.56	SMOC2	GO_Biological_Process_2025	1
Testis_vs_ChoroidPlexus	All_genes	Cellular Response to Interleukin-15 (GO:0071350)	'1/9	0.0116415	0.0704494	0	0	99.83	444.56	PLCB1	GO_Biological_Process_2025	1
Testis_vs_ChoroidPlexus	All_genes	Positive Regulation of Protein Autophosphorylation (GO:0031954)	'1/9	0.0116415	0.0704494	0	0	99.83	444.56	NRG1	GO_Biological_Process_2025	1
Testis_vs_ChoroidPlexus	All_genes	Positive Regulation of Acrosome Reaction (GO:2000344)	'1/9	0.0116415	0.0704494	0	0	99.83	444.56	PLCB1	GO_Biological_Process_2025	1
Testis_vs_ChoroidPlexus	All_genes	Negative Regulation of Striated Muscle Cell Apoptotic Process (GO:0010664)	'1/9	0.0116415	0.0704494	0	0	99.83	444.56	NRG1	GO_Biological_Process_2025	1
Testis_vs_ChoroidPlexus	All_genes	Interleukin-15-Mediated Signaling Pathway (GO:0035723)	'1/9	0.0116415	0.0704494	0	0	99.83	444.56	PLCB1	GO_Biological_Process_2025	1
Testis_vs_ChoroidPlexus	All_genes	Intestinal Cholesterol Absorption (GO:0030299)	'1/9	0.0116415	0.0704494	0	0	99.83	444.56	LIMA1	GO_Biological_Process_2025	1
Testis_vs_ChoroidPlexus	All_genes	Neuroepithelial Cell Differentiation (GO:0060563)	'1/9	0.0116415	0.0704494	0	0	99.83	444.56	MAP1B	GO_Biological_Process_2025	1
Testis_vs_ChoroidPlexus	All_genes	Potassium Ion Transport (GO:0006813)	'2/127	0.0117689	0.0704494	0	0	13.2327	58.7834	SLC24A3;NALCN	GO_Biological_Process_2025	2
Testis_vs_ChoroidPlexus	All_genes	Positive Regulation of Gluconeogenesis (GO:0045722)	'1/10	0.012927	0.0704494	0	0	88.7333	385.851	PRKAG2	GO_Biological_Process_2025	1
Testis_vs_ChoroidPlexus	All_genes	Cellular Response to Interleukin-12 (GO:0071349)	'1/10	0.012927	0.0704494	0	0	88.7333	385.851	PLCB1	GO_Biological_Process_2025	1
Testis_vs_ChoroidPlexus	All_genes	Glucan Metabolic Process (GO:0044042)	'1/10	0.012927	0.0704494	0	0	88.7333	385.851	PRKAG2	GO_Biological_Process_2025	1
Testis_vs_ChoroidPlexus	All_genes	Potassium Ion Transmembrane Transport (GO:0071805)	'2/134	0.0130348	0.0704494	0	0	12.5265	54.3667	SLC24A3;NALCN	GO_Biological_Process_2025	2
Testis_vs_ChoroidPlexus	All_genes	Purine Ribonucleoside Triphosphate Biosynthetic Process (GO:0009206)	'1/11	0.0142108	0.0704494	0	0	79.856	339.688	PRKAG2	GO_Biological_Process_2025	1
Testis_vs_ChoroidPlexus	All_genes	Insulin-Like Growth Factor Receptor Signaling Pathway (GO:0048009)	'1/11	0.0142108	0.0704494	0	0	79.856	339.688	PLCB1	GO_Biological_Process_2025	1
Testis_vs_ChoroidPlexus	All_genes	Intestinal Lipid Absorption (GO:0098856)	'1/11	0.0142108	0.0704494	0	0	79.856	339.688	LIMA1	GO_Biological_Process_2025	1
Testis_vs_ChoroidPlexus	All_genes	Regulation of Cardiac Muscle Cell Apoptotic Process (GO:0010665)	'1/11	0.0142108	0.0704494	0	0	79.856	339.688	NRG1	GO_Biological_Process_2025	1
Testis_vs_ChoroidPlexus	All_genes	Positive Regulation of Vascular Endothelial Growth Factor Signaling Pathway (GO:1900748)	'1/11	0.0142108	0.0704494	0	0	79.856	339.688	SMOC2	GO_Biological_Process_2025	1
Testis_vs_ChoroidPlexus	All_genes	Regulation of Purine Nucleotide Catabolic Process (GO:0033121)	'1/11	0.0142108	0.0704494	0	0	79.856	339.688	PRKAG2	GO_Biological_Process_2025	1
Testis_vs_ChoroidPlexus	All_genes	Plasma Membrane Bounded Cell Projection Organization (GO:0120036)	'2/141	0.0143577	0.0704494	0	0	11.8915	50.4612	LIMA1;MAP1B	GO_Biological_Process_2025	2
Testis_vs_ChoroidPlexus	All_genes	Positive Regulation of Glycoprotein Biosynthetic Process (GO:0010560)	'1/12	0.015493	0.0704494	0	0	72.5927	302.52	PLCB1	GO_Biological_Process_2025	1
Testis_vs_ChoroidPlexus	All_genes	Regulation of Ketone Metabolic Process (GO:0010565)	'1/12	0.015493	0.0704494	0	0	72.5927	302.52	PRKAG2	GO_Biological_Process_2025	1
Testis_vs_ChoroidPlexus	All_genes	Regulation of Actin Filament Depolymerization (GO:0030834)	'1/12	0.015493	0.0704494	0	0	72.5927	302.52	LIMA1	GO_Biological_Process_2025	1
Testis_vs_ChoroidPlexus	All_genes	Sodium Ion Export Across Plasma Membrane (GO:0036376)	'1/12	0.015493	0.0704494	0	0	72.5927	302.52	SLC4A4	GO_Biological_Process_2025	1
Testis_vs_ChoroidPlexus	All_genes	Cardiocyte Differentiation (GO:0035051)	'1/13	0.0167737	0.0704494	0	0	66.54	272.012	NRG1	GO_Biological_Process_2025	1
Testis_vs_ChoroidPlexus	All_genes	ERBB2 Signaling Pathway (GO:0038128)	'1/13	0.0167737	0.0704494	0	0	66.54	272.012	NRG1	GO_Biological_Process_2025	1
Testis_vs_ChoroidPlexus	All_genes	Activation of Protein Kinase B Activity (GO:0032148)	'1/13	0.0167737	0.0704494	0	0	66.54	272.012	NRG1	GO_Biological_Process_2025	1
Testis_vs_ChoroidPlexus	All_genes	Motor Neuron Axon Guidance (GO:0008045)	'1/13	0.0167737	0.0704494	0	0	66.54	272.012	SLIT3	GO_Biological_Process_2025	1
Testis_vs_ChoroidPlexus	All_genes	Negative Regulation of Secretion (GO:0051048)	'1/13	0.0167737	0.0704494	0	0	66.54	272.012	NRG1	GO_Biological_Process_2025	1
Testis_vs_ChoroidPlexus	All_genes	Regulation of Acrosome Reaction (GO:0060046)	'1/13	0.0167737	0.0704494	0	0	66.54	272.012	PLCB1	GO_Biological_Process_2025	1
Testis_vs_ChoroidPlexus	All_genes	Regulation of Carbohydrate Catabolic Process (GO:0043470)	'1/13	0.0167737	0.0704494	0	0	66.54	272.012	PRKAG2	GO_Biological_Process_2025	1
Testis_vs_ChoroidPlexus	All_genes	Atrioventricular Valve Development (GO:0003171)	'1/13	0.0167737	0.0704494	0	0	66.54	272.012	SLIT3	GO_Biological_Process_2025	1
Testis_vs_ChoroidPlexus	All_genes	Regulation of Cell Fate Commitment (GO:0010453)	'1/13	0.0167737	0.0704494	0	0	66.54	272.012	CHD3	GO_Biological_Process_2025	1
Testis_vs_ChoroidPlexus	All_genes	Positive Regulation of Cardiac Muscle Cell Proliferation (GO:0060045)	'1/14	0.0180527	0.0738519	0	0	61.4185	246.562	NRG1	GO_Biological_Process_2025	1
Testis_vs_ChoroidPlexus	All_genes	Positive Regulation of Endothelial Cell Chemotaxis (GO:2001028)	'1/14	0.0180527	0.0738519	0	0	61.4185	246.562	SMOC2	GO_Biological_Process_2025	1
Testis_vs_ChoroidPlexus	All_genes	Regulation of Fatty Acid Oxidation (GO:0046320)	'1/15	0.0193301	0.0742559	0	0	57.0286	225.04	PRKAG2	GO_Biological_Process_2025	1
Testis_vs_ChoroidPlexus	All_genes	Negative Regulation of Mononuclear Cell Migration (GO:0071676)	'1/15	0.0193301	0.0742559	0	0	57.0286	225.04	PLCB1	GO_Biological_Process_2025	1
Testis_vs_ChoroidPlexus	All_genes	Regulation of ATP Metabolic Process (GO:1903578)	'1/15	0.0193301	0.0742559	0	0	57.0286	225.04	PRKAG2	GO_Biological_Process_2025	1
Testis_vs_ChoroidPlexus	All_genes	Digestive System Development (GO:0055123)	'1/15	0.0193301	0.0742559	0	0	57.0286	225.04	CLMP	GO_Biological_Process_2025	1
Testis_vs_ChoroidPlexus	All_genes	Stem Cell Development (GO:0048864)	'1/15	0.0193301	0.0742559	0	0	57.0286	225.04	NRG1	GO_Biological_Process_2025	1
Testis_vs_ChoroidPlexus	All_genes	Ruffle Organization (GO:0031529)	'1/16	0.0206059	0.0751571	0	0	53.224	206.625	LIMA1	GO_Biological_Process_2025	1
Testis_vs_ChoroidPlexus	All_genes	RNA Splicing, via Transesterification Reactions With Bulged Adenosine as Nucleophile (GO:0000377)	'2/171	0.0206471	0.0751571	0	0	9.76578	37.893	SNRPN;TRA2A	GO_Biological_Process_2025	2
Testis_vs_ChoroidPlexus	All_genes	Regulation of Secretion (GO:0051046)	'1/17	0.0218802	0.0751571	0	0	49.895	190.707	NRG1	GO_Biological_Process_2025	1
Testis_vs_ChoroidPlexus	All_genes	Regulation of Endothelial Cell Chemotaxis (GO:2001026)	'1/17	0.0218802	0.0751571	0	0	49.895	190.707	SMOC2	GO_Biological_Process_2025	1
Testis_vs_ChoroidPlexus	All_genes	G Protein-Coupled Acetylcholine Receptor Signaling Pathway (GO:0007213)	'1/17	0.0218802	0.0751571	0	0	49.895	190.707	PLCB1	GO_Biological_Process_2025	1
Testis_vs_ChoroidPlexus	All_genes	Regulation of D-glucose Transmembrane Transport (GO:0010827)	'1/17	0.0218802	0.0751571	0	0	49.895	190.707	PRKAG2	GO_Biological_Process_2025	1
Testis_vs_ChoroidPlexus	All_genes	Positive Regulation of Cardiac Muscle Tissue Growth (GO:0055023)	'1/17	0.0218802	0.0751571	0	0	49.895	190.707	NRG1	GO_Biological_Process_2025	1
Testis_vs_ChoroidPlexus	All_genes	Negative Regulation of RNA Biosynthetic Process (GO:1902679)	'3/470	0.0224529	0.0751571	0	0	5.44838	20.6839	NRG1;CHD3;PLCB1	GO_Biological_Process_2025	3
Testis_vs_ChoroidPlexus	All_genes	Positive Regulation of Glucose Metabolic Process (GO:0010907)	'1/18	0.0231528	0.0751571	0	0	46.9576	176.826	PRKAG2	GO_Biological_Process_2025	1
Testis_vs_ChoroidPlexus	All_genes	Positive Regulation of Muscle Cell Differentiation (GO:0051149)	'1/18	0.0231528	0.0751571	0	0	46.9576	176.826	NRG1	GO_Biological_Process_2025	1
Testis_vs_ChoroidPlexus	All_genes	Negative Regulation of Nervous System Development (GO:0051961)	'1/18	0.0231528	0.0751571	0	0	46.9576	176.826	SLIT3	GO_Biological_Process_2025	1
Testis_vs_ChoroidPlexus	All_genes	Neural Crest Cell Differentiation (GO:0014033)	'1/18	0.0231528	0.0751571	0	0	46.9576	176.826	NRG1	GO_Biological_Process_2025	1
Testis_vs_ChoroidPlexus	All_genes	Positive Regulation of Glycolytic Process (GO:0045821)	'1/19	0.0244238	0.0751571	0	0	44.3467	164.624	SLC4A4	GO_Biological_Process_2025	1
Testis_vs_ChoroidPlexus	All_genes	Positive Regulation of Purine Nucleotide Catabolic Process (GO:0033123)	'1/19	0.0244238	0.0751571	0	0	44.3467	164.624	SLC4A4	GO_Biological_Process_2025	1
Testis_vs_ChoroidPlexus	All_genes	Positive Regulation of Embryonic Development (GO:0040019)	'1/19	0.0244238	0.0751571	0	0	44.3467	164.624	PLCB1	GO_Biological_Process_2025	1
Testis_vs_ChoroidPlexus	All_genes	Generation of Neurons (GO:0048699)	'2/192	0.0256173	0.0751571	0	0	8.67719	31.7975	BTG4;MAP1B	GO_Biological_Process_2025	2
Testis_vs_ChoroidPlexus	All_genes	Energy Reserve Metabolic Process (GO:0006112)	'1/20	0.0256933	0.0751571	0	0	42.0105	153.823	PRKAG2	GO_Biological_Process_2025	1
Testis_vs_ChoroidPlexus	All_genes	Regulation of Synaptic Transmission, GABAergic (GO:0032228)	'1/20	0.0256933	0.0751571	0	0	42.0105	153.823	NALCN	GO_Biological_Process_2025	1
Testis_vs_ChoroidPlexus	All_genes	Regulation of Fatty Acid Metabolic Process (GO:0019217)	'1/20	0.0256933	0.0751571	0	0	42.0105	153.823	PRKAG2	GO_Biological_Process_2025	1
Testis_vs_ChoroidPlexus	All_genes	Glycogen Metabolic Process (GO:0005977)	'1/20	0.0256933	0.0751571	0	0	42.0105	153.823	PRKAG2	GO_Biological_Process_2025	1
Testis_vs_ChoroidPlexus	All_genes	Heart Trabecula Morphogenesis (GO:0061384)	'1/20	0.0256933	0.0751571	0	0	42.0105	153.823	NRG1	GO_Biological_Process_2025	1
Testis_vs_ChoroidPlexus	All_genes	Interleukin-1-Mediated Signaling Pathway (GO:0070498)	'1/20	0.0256933	0.0751571	0	0	42.0105	153.823	PLCB1	GO_Biological_Process_2025	1
Testis_vs_ChoroidPlexus	All_genes	Atrioventricular Valve Morphogenesis (GO:0003181)	'1/20	0.0256933	0.0751571	0	0	42.0105	153.823	SLIT3	GO_Biological_Process_2025	1
Testis_vs_ChoroidPlexus	All_genes	Bicarbonate Transport (GO:0015701)	'1/20	0.0256933	0.0751571	0	0	42.0105	153.823	SLC4A4	GO_Biological_Process_2025	1
Testis_vs_ChoroidPlexus	All_genes	Striated Muscle Cell Differentiation (GO:0051146)	'1/20	0.0256933	0.0751571	0	0	42.0105	153.823	NRG1	GO_Biological_Process_2025	1
Testis_vs_ChoroidPlexus	All_genes	Negative Regulation of Cilium Assembly (GO:1902018)	'1/21	0.0269611	0.0751571	0	0	39.908	144.202	LIMA1	GO_Biological_Process_2025	1
Testis_vs_ChoroidPlexus	All_genes	Peripheral Nervous System Development (GO:0007422)	'1/21	0.0269611	0.0751571	0	0	39.908	144.202	NRG1	GO_Biological_Process_2025	1
Testis_vs_ChoroidPlexus	All_genes	Regulation of Fibroblast Growth Factor Receptor Signaling Pathway (GO:0040036)	'1/21	0.0269611	0.0751571	0	0	39.908	144.202	SMOC2	GO_Biological_Process_2025	1
Testis_vs_ChoroidPlexus	All_genes	Regulation of Generation of Precursor Metabolites and Energy (GO:0043467)	'1/21	0.0269611	0.0751571	0	0	39.908	144.202	PRKAG2	GO_Biological_Process_2025	1
Testis_vs_ChoroidPlexus	All_genes	Myoblast Differentiation (GO:0045445)	'1/21	0.0269611	0.0751571	0	0	39.908	144.202	NRG1	GO_Biological_Process_2025	1
Testis_vs_ChoroidPlexus	All_genes	Regulation of Cardiac Muscle Cell Proliferation (GO:0060043)	'1/21	0.0269611	0.0751571	0	0	39.908	144.202	NRG1	GO_Biological_Process_2025	1
Testis_vs_ChoroidPlexus	All_genes	Axonogenesis (GO:0007409)	'2/200	0.0276272	0.0763383	0	0	8.32323	29.8717	MAP1B;SLIT3	GO_Biological_Process_2025	2
Testis_vs_ChoroidPlexus	All_genes	Mammary Gland Development (GO:0030879)	'1/22	0.0282274	0.0773186	0	0	38.0057	135.584	NRG1	GO_Biological_Process_2025	1
Testis_vs_ChoroidPlexus	All_genes	Positive Regulation of mRNA Splicing, via Spliceosome (GO:0048026)	'1/23	0.0294921	0.0787289	0	0	36.2764	127.825	TRA2A	GO_Biological_Process_2025	1
Testis_vs_ChoroidPlexus	All_genes	Phosphatidylinositol-Mediated Signaling (GO:0048015)	'1/23	0.0294921	0.0787289	0	0	36.2764	127.825	PLCB1	GO_Biological_Process_2025	1
Testis_vs_ChoroidPlexus	All_genes	Negative Regulation of Cell Junction Assembly (GO:1901889)	'1/23	0.0294921	0.0787289	0	0	36.2764	127.825	SLIT3	GO_Biological_Process_2025	1
Testis_vs_ChoroidPlexus	All_genes	mRNA Splicing, via Spliceosome (GO:0000398)	'2/211	0.0304918	0.0794089	0	0	7.88078	27.5063	SNRPN;TRA2A	GO_Biological_Process_2025	2
Testis_vs_ChoroidPlexus	All_genes	ATP Biosynthetic Process (GO:0006754)	'1/24	0.0307552	0.0794089	0	0	34.6974	120.806	PRKAG2	GO_Biological_Process_2025	1
Testis_vs_ChoroidPlexus	All_genes	Response to Ketone (GO:1901654)	'1/24	0.0307552	0.0794089	0	0	34.6974	120.806	SLIT3	GO_Biological_Process_2025	1
Testis_vs_ChoroidPlexus	All_genes	Positive Regulation of Striated Muscle Cell Differentiation (GO:0051155)	'1/24	0.0307552	0.0794089	0	0	34.6974	120.806	NRG1	GO_Biological_Process_2025	1
Testis_vs_ChoroidPlexus	All_genes	Regulation of Vascular Endothelial Growth Factor Signaling Pathway (GO:1900746)	'1/25	0.0320167	0.0794116	0	0	33.25	114.43	SMOC2	GO_Biological_Process_2025	1
Testis_vs_ChoroidPlexus	All_genes	Negative Regulation of Protein Depolymerization (GO:1901880)	'1/25	0.0320167	0.0794116	0	0	33.25	114.43	LIMA1	GO_Biological_Process_2025	1
Testis_vs_ChoroidPlexus	All_genes	Response to Glucocorticoid (GO:0051384)	'1/25	0.0320167	0.0794116	0	0	33.25	114.43	SLIT3	GO_Biological_Process_2025	1
Testis_vs_ChoroidPlexus	All_genes	Negative Chemotaxis (GO:0050919)	'1/25	0.0320167	0.0794116	0	0	33.25	114.43	SLIT3	GO_Biological_Process_2025	1
Testis_vs_ChoroidPlexus	All_genes	Steroid Biosynthetic Process (GO:0006694)	'1/25	0.0320167	0.0794116	0	0	33.25	114.43	PRKAG2	GO_Biological_Process_2025	1
Testis_vs_ChoroidPlexus	All_genes	Positive Regulation of mRNA Processing (GO:0050685)	'1/26	0.0332767	0.081257	0	0	31.9184	108.615	TRA2A	GO_Biological_Process_2025	1
Testis_vs_ChoroidPlexus	All_genes	Positive Regulation of Rho Protein Signal Transduction (GO:0035025)	'1/26	0.0332767	0.081257	0	0	31.9184	108.615	PRPF38B	GO_Biological_Process_2025	1
Testis_vs_ChoroidPlexus	All_genes	Cardiac Muscle Cell Differentiation (GO:0055007)	'1/27	0.0345351	0.0816988	0	0	30.6892	103.293	NRG1	GO_Biological_Process_2025	1
Testis_vs_ChoroidPlexus	All_genes	Regulation of Microtubule Polymerization or Depolymerization (GO:0031110)	'1/27	0.0345351	0.0816988	0	0	30.6892	103.293	MAP1B	GO_Biological_Process_2025	1
Testis_vs_ChoroidPlexus	All_genes	mRNA Processing (GO:0006397)	'2/226	0.0345806	0.0816988	0	0	7.34747	24.7203	SNRPN;TRA2A	GO_Biological_Process_2025	2
Testis_vs_ChoroidPlexus	All_genes	Positive Regulation of Mitotic Cell Cycle (GO:0045931)	'1/28	0.0357919	0.0816988	0	0	29.5511	98.4062	SMOC2	GO_Biological_Process_2025	1
Testis_vs_ChoroidPlexus	All_genes	Ventricular Septum Morphogenesis (GO:0060412)	'1/28	0.0357919	0.0816988	0	0	29.5511	98.4062	SLIT3	GO_Biological_Process_2025	1
Testis_vs_ChoroidPlexus	All_genes	Positive Regulation of ATP Metabolic Process (GO:1903580)	'1/28	0.0357919	0.0816988	0	0	29.5511	98.4062	SLC4A4	GO_Biological_Process_2025	1
Testis_vs_ChoroidPlexus	All_genes	Regulation of DNA Biosynthetic Process (GO:2000278)	'1/28	0.0357919	0.0816988	0	0	29.5511	98.4062	SMOC2	GO_Biological_Process_2025	1
Testis_vs_ChoroidPlexus	All_genes	Regulation of Microtubule Depolymerization (GO:0031114)	'1/28	0.0357919	0.0816988	0	0	29.5511	98.4062	MAP1B	GO_Biological_Process_2025	1
Testis_vs_ChoroidPlexus	All_genes	Sterol Biosynthetic Process (GO:0016126)	'1/28	0.0357919	0.0816988	0	0	29.5511	98.4062	PRKAG2	GO_Biological_Process_2025	1
Testis_vs_ChoroidPlexus	All_genes	Negative Regulation of Cytoskeleton Organization (GO:0051494)	'1/29	0.0370471	0.0833559	0	0	28.4943	93.9048	LIMA1	GO_Biological_Process_2025	1
Testis_vs_ChoroidPlexus	All_genes	Regulation of Supramolecular Fiber Organization (GO:1902903)	'1/29	0.0370471	0.0833559	0	0	28.4943	93.9048	MAP1B	GO_Biological_Process_2025	1
Testis_vs_ChoroidPlexus	All_genes	Response to Alcohol (GO:0097305)	'1/32	0.0408033	0.0907292	0	0	25.7329	82.3193	SLIT3	GO_Biological_Process_2025	1
Testis_vs_ChoroidPlexus	All_genes	Positive Regulation of Interleukin-12 Production (GO:0032735)	'1/33	0.0420523	0.0907292	0	0	24.9275	78.9913	PLCB1	GO_Biological_Process_2025	1
Testis_vs_ChoroidPlexus	All_genes	Regulation of Small Molecule Metabolic Process (GO:0062012)	'1/33	0.0420523	0.0907292	0	0	24.9275	78.9913	PRKAG2	GO_Biological_Process_2025	1
Testis_vs_ChoroidPlexus	All_genes	Ventricular Cardiac Muscle Tissue Morphogenesis (GO:0055010)	'1/33	0.0420523	0.0907292	0	0	24.9275	78.9913	NRG1	GO_Biological_Process_2025	1
Testis_vs_ChoroidPlexus	All_genes	Positive Regulation of G1/S Transition of Mitotic Cell Cycle (GO:1900087)	'1/33	0.0420523	0.0907292	0	0	24.9275	78.9913	PLCB1	GO_Biological_Process_2025	1
Testis_vs_ChoroidPlexus	All_genes	Actin Filament Bundle Assembly (GO:0051017)	'1/33	0.0420523	0.0907292	0	0	24.9275	78.9913	LIMA1	GO_Biological_Process_2025	1
Testis_vs_ChoroidPlexus	All_genes	Regulation of Developmental Growth (GO:0048638)	'1/34	0.0432997	0.0909293	0	0	24.1709	75.8872	PLCB1	GO_Biological_Process_2025	1
Testis_vs_ChoroidPlexus	All_genes	Regulation of Gluconeogenesis (GO:0006111)	'1/34	0.0432997	0.0909293	0	0	24.1709	75.8872	PRKAG2	GO_Biological_Process_2025	1
Testis_vs_ChoroidPlexus	All_genes	Actin Filament Bundle Organization (GO:0061572)	'1/34	0.0432997	0.0909293	0	0	24.1709	75.8872	LIMA1	GO_Biological_Process_2025	1
Testis_vs_ChoroidPlexus	All_genes	Positive Regulation of Carbohydrate Metabolic Process (GO:0045913)	'1/34	0.0432997	0.0909293	0	0	24.1709	75.8872	SLC4A4	GO_Biological_Process_2025	1
Testis_vs_ChoroidPlexus	All_genes	Cellular Response to Hydrogen Peroxide (GO:0070301)	'1/35	0.0445455	0.0923147	0	0	23.4588	72.9861	PRPF38B	GO_Biological_Process_2025	1
Testis_vs_ChoroidPlexus	All_genes	Acetylcholine Receptor Signaling Pathway (GO:0095500)	'1/35	0.0445455	0.0923147	0	0	23.4588	72.9861	PLCB1	GO_Biological_Process_2025	1
Testis_vs_ChoroidPlexus	All_genes	Glutamate Receptor Signaling Pathway (GO:0007215)	'1/36	0.0457898	0.0924601	0	0	22.7874	70.2695	PLCB1	GO_Biological_Process_2025	1
Testis_vs_ChoroidPlexus	All_genes	Regulation of D-glucose Import (GO:0046324)	'1/36	0.0457898	0.0924601	0	0	22.7874	70.2695	PRKAG2	GO_Biological_Process_2025	1
Testis_vs_ChoroidPlexus	All_genes	Negative Regulation of Plasma Membrane Bounded Cell Projection Assembly (GO:0120033)	'1/36	0.0457898	0.0924601	0	0	22.7874	70.2695	LIMA1	GO_Biological_Process_2025	1
Testis_vs_ChoroidPlexus	All_genes	Positive Regulation of RNA Splicing (GO:0033120)	'1/36	0.0457898	0.0924601	0	0	22.7874	70.2695	TRA2A	GO_Biological_Process_2025	1
Testis_vs_ChoroidPlexus	All_genes	Ventricular Septum Development (GO:0003281)	'1/38	0.0482736	0.0944484	0	0	21.5535	65.3259	SLIT3	GO_Biological_Process_2025	1
Testis_vs_ChoroidPlexus	All_genes	Positive Regulation of Reproductive Process (GO:2000243)	'1/38	0.0482736	0.0944484	0	0	21.5535	65.3259	PLCB1	GO_Biological_Process_2025	1
Testis_vs_ChoroidPlexus	All_genes	Negative Regulation of Transport (GO:0051051)	'1/38	0.0482736	0.0944484	0	0	21.5535	65.3259	NRG1	GO_Biological_Process_2025	1
Testis_vs_ChoroidPlexus	All_genes	Aortic Valve Morphogenesis (GO:0003180)	'1/38	0.0482736	0.0944484	0	0	21.5535	65.3259	SLIT3	GO_Biological_Process_2025	1
Testis_vs_ChoroidPlexus	All_genes	Neuron Projection Extension (GO:1990138)	'1/38	0.0482736	0.0944484	0	0	21.5535	65.3259	MAP1B	GO_Biological_Process_2025	1
Testis_vs_ChoroidPlexus	All_genes	Negative Regulation of G Protein-Coupled Receptor Signaling Pathway (GO:0045744)	'1/39	0.0495132	0.0962757	0	0	20.9853	63.0715	SLIT3	GO_Biological_Process_2025	1
Testis_vs_ChoroidPlexus	All_genes	G2/M Transition of Mitotic Cell Cycle (GO:0000086)	'1/40	0.0507513	0.097464	0	0	20.4462	60.9463	PLCB1	GO_Biological_Process_2025	1
Testis_vs_ChoroidPlexus	All_genes	Negative Regulation of Sequestering of Calcium Ion (GO:0051283)	'1/40	0.0507513	0.097464	0	0	20.4462	60.9463	PLCB1	GO_Biological_Process_2025	1
Testis_vs_ChoroidPlexus	All_genes	Negative Regulation of Kinase Activity (GO:0033673)	'1/41	0.0519878	0.097464	0	0	19.934	58.9398	PRKAG2	GO_Biological_Process_2025	1
Testis_vs_ChoroidPlexus	All_genes	Positive Regulation of Myoblast Differentiation (GO:0045663)	'1/41	0.0519878	0.097464	0	0	19.934	58.9398	PLCB1	GO_Biological_Process_2025	1
Testis_vs_ChoroidPlexus	All_genes	Positive Regulation of DNA Biosynthetic Process (GO:2000573)	'1/41	0.0519878	0.097464	0	0	19.934	58.9398	SMOC2	GO_Biological_Process_2025	1
Testis_vs_ChoroidPlexus	All_genes	Aortic Valve Development (GO:0003176)	'1/41	0.0519878	0.097464	0	0	19.934	58.9398	SLIT3	GO_Biological_Process_2025	1
Testis_vs_ChoroidPlexus	All_genes	Response to Hydrogen Peroxide (GO:0042542)	'1/42	0.0532227	0.097464	0	0	19.4468	57.0428	PRPF38B	GO_Biological_Process_2025	1
Testis_vs_ChoroidPlexus	All_genes	Digestive Tract Development (GO:0048565)	'1/42	0.0532227	0.097464	0	0	19.4468	57.0428	CLMP	GO_Biological_Process_2025	1
Testis_vs_ChoroidPlexus	All_genes	Cell Cycle G2/M Phase Transition (GO:0044839)	'1/43	0.0544561	0.097464	0	0	18.9829	55.247	PLCB1	GO_Biological_Process_2025	1
Testis_vs_ChoroidPlexus	All_genes	Cellular Response to Glucose Starvation (GO:0042149)	'1/43	0.0544561	0.097464	0	0	18.9829	55.247	PRKAG2	GO_Biological_Process_2025	1
Testis_vs_ChoroidPlexus	All_genes	Release of Sequestered Calcium Ion Into Cytosol (GO:0051209)	'1/43	0.0544561	0.097464	0	0	18.9829	55.247	PLCB1	GO_Biological_Process_2025	1
Testis_vs_ChoroidPlexus	All_genes	RNA Transport (GO:0050658)	'1/43	0.0544561	0.097464	0	0	18.9829	55.247	RBFOX1	GO_Biological_Process_2025	1
Testis_vs_ChoroidPlexus	All_genes	Negative Regulation of Organelle Assembly (GO:1902116)	'1/43	0.0544561	0.097464	0	0	18.9829	55.247	LIMA1	GO_Biological_Process_2025	1
Testis_vs_ChoroidPlexus	All_genes	Neural Crest Cell Development (GO:0014032)	'1/43	0.0544561	0.097464	0	0	18.9829	55.247	NRG1	GO_Biological_Process_2025	1
Testis_vs_ChoroidPlexus	All_genes	Positive Regulation of Cell Cycle G1/S Phase Transition (GO:1902808)	'1/44	0.055688	0.0985489	0	0	18.5405	53.5447	PLCB1	GO_Biological_Process_2025	1
Testis_vs_ChoroidPlexus	All_genes	Positive Regulation of Wound Healing (GO:0090303)	'1/44	0.055688	0.0985489	0	0	18.5405	53.5447	SMOC2	GO_Biological_Process_2025	1
Testis_vs_ChoroidPlexus	All_genes	Cell Surface Receptor Protein Tyrosine Kinase Signaling Pathway (GO:0007169)	'2/296	0.0562008	0.0989008	0	0	5.57823	16.0588	NRG1;PLCB1	GO_Biological_Process_2025	2
Testis_vs_ChoroidPlexus	All_genes	Purine Ribonucleotide Biosynthetic Process (GO:0009152)	'1/45	0.0569183	0.099607	0	0	18.1182	51.9292	PRKAG2	GO_Biological_Process_2025	1
Testis_vs_ChoroidPlexus	All_genes	Positive Regulation of Chemotaxis (GO:0050921)	'1/46	0.058147	0.101195	0	0	17.7147	50.3943	SMOC2	GO_Biological_Process_2025	1
Testis_vs_ChoroidPlexus	All_genes	Cellular Response to Radiation (GO:0071478)	'1/47	0.0593743	0.102763	0	0	17.3287	48.9344	PRPF38B	GO_Biological_Process_2025	1
Testis_vs_ChoroidPlexus	All_genes	Regulation of Stem Cell Differentiation (GO:2000736)	'1/49	0.0618241	0.10584	0	0	16.605	46.2194	CHD3	GO_Biological_Process_2025	1
Testis_vs_ChoroidPlexus	All_genes	Activation of Protein Kinase Activity (GO:0032147)	'1/49	0.0618241	0.10584	0	0	16.605	46.2194	NRG1	GO_Biological_Process_2025	1
Testis_vs_ChoroidPlexus	All_genes	Regulation of Interleukin-12 Production (GO:0032655)	'1/50	0.0630467	0.106773	0	0	16.2653	44.9553	PLCB1	GO_Biological_Process_2025	1
Testis_vs_ChoroidPlexus	All_genes	Positive Regulation of Developmental Growth (GO:0048639)	'1/50	0.0630467	0.106773	0	0	16.2653	44.9553	PLCB1	GO_Biological_Process_2025	1
Testis_vs_ChoroidPlexus	All_genes	Regulation of Cell Cycle (GO:0051726)	'2/318	0.0637712	0.107113	0	0	5.18407	14.2689	BTG4;PRKAG2	GO_Biological_Process_2025	2
Testis_vs_ChoroidPlexus	All_genes	Cardiac Muscle Tissue Development (GO:0048738)	'1/51	0.0642678	0.107113	0	0	15.9392	43.7483	NRG1	GO_Biological_Process_2025	1
Testis_vs_ChoroidPlexus	All_genes	Regulation of Lipid Metabolic Process (GO:0019216)	'1/51	0.0642678	0.107113	0	0	15.9392	43.7483	PRKAG2	GO_Biological_Process_2025	1
Testis_vs_ChoroidPlexus	All_genes	Cellular Response to Ionizing Radiation (GO:0071479)	'1/53	0.0667054	0.110012	0	0	15.3246	41.4909	PRPF38B	GO_Biological_Process_2025	1
Testis_vs_ChoroidPlexus	All_genes	Positive Regulation of Small GTPase Mediated Signal Transduction (GO:0051057)	'1/53	0.0667054	0.110012	0	0	15.3246	41.4909	PRPF38B	GO_Biological_Process_2025	1
Testis_vs_ChoroidPlexus	All_genes	Regulation of Alternative mRNA Splicing, via Spliceosome (GO:0000381)	'1/55	0.0691369	0.113428	0	0	14.7556	39.4219	RBFOX1	GO_Biological_Process_2025	1
Testis_vs_ChoroidPlexus	All_genes	Memory (GO:0007613)	'1/57	0.0715623	0.116196	0	0	14.2271	37.5196	PLCB1	GO_Biological_Process_2025	1
Testis_vs_ChoroidPlexus	All_genes	Cellular Response to Interleukin-1 (GO:0071347)	'1/57	0.0715623	0.116196	0	0	14.2271	37.5196	PLCB1	GO_Biological_Process_2025	1
Testis_vs_ChoroidPlexus	All_genes	ERBB Signaling Pathway (GO:0038127)	'1/58	0.0727727	0.116362	0	0	13.9768	36.6251	NRG1	GO_Biological_Process_2025	1
Testis_vs_ChoroidPlexus	All_genes	Regulation of Myoblast Differentiation (GO:0045661)	'1/58	0.0727727	0.116362	0	0	13.9768	36.6251	PLCB1	GO_Biological_Process_2025	1
Testis_vs_ChoroidPlexus	All_genes	Sterol Metabolic Process (GO:0016125)	'1/58	0.0727727	0.116362	0	0	13.9768	36.6251	PRKAG2	GO_Biological_Process_2025	1
Testis_vs_ChoroidPlexus	All_genes	Regulation of Embryonic Development (GO:0045995)	'1/59	0.0739816	0.117698	0	0	13.7352	35.7656	PLCB1	GO_Biological_Process_2025	1
Testis_vs_ChoroidPlexus	All_genes	Negative Regulation of Protein Kinase Activity (GO:0006469)	'1/60	0.075189	0.117833	0	0	13.5017	34.939	PRKAG2	GO_Biological_Process_2025	1
Testis_vs_ChoroidPlexus	All_genes	Positive Regulation of Cell Cycle (GO:0045787)	'1/60	0.075189	0.117833	0	0	13.5017	34.939	SMOC2	GO_Biological_Process_2025	1
Testis_vs_ChoroidPlexus	All_genes	Neuron Migration (GO:0001764)	'1/60	0.075189	0.117833	0	0	13.5017	34.939	MAP1B	GO_Biological_Process_2025	1
Testis_vs_ChoroidPlexus	All_genes	Positive Regulation of Macromolecule Biosynthetic Process (GO:0010557)	'2/355	0.0772324	0.120413	0	0	4.63196	11.8622	SMOC2;SLC24A3	GO_Biological_Process_2025	2
Testis_vs_ChoroidPlexus	All_genes	ATP Metabolic Process (GO:0046034)	'1/62	0.0775992	0.120413	0	0	13.0577	33.3781	PRKAG2	GO_Biological_Process_2025	1
Testis_vs_ChoroidPlexus	All_genes	Positive Regulation of Peptidyl-Tyrosine Phosphorylation (GO:0050731)	'1/63	0.0788021	0.12168	0	0	12.8465	32.6405	NRG1	GO_Biological_Process_2025	1
Testis_vs_ChoroidPlexus	All_genes	Positive Regulation of MAPK Cascade (GO:0043410)	'2/362	0.0798748	0.121744	0	0	4.54028	11.4746	NRG1;PLCB1	GO_Biological_Process_2025	2
Testis_vs_ChoroidPlexus	All_genes	Regulation of Synapse Assembly (GO:0051963)	'1/64	0.0800034	0.121744	0	0	12.6419	31.9295	SLIT3	GO_Biological_Process_2025	1
Testis_vs_ChoroidPlexus	All_genes	Positive Regulation of Mitotic Cell Cycle Phase Transition (GO:1901992)	'1/64	0.0800034	0.121744	0	0	12.6419	31.9295	PLCB1	GO_Biological_Process_2025	1
Testis_vs_ChoroidPlexus	All_genes	Glycerophospholipid Metabolic Process (GO:0006650)	'1/65	0.0812032	0.122976	0	0	12.4437	31.2438	PLCB1	GO_Biological_Process_2025	1
Testis_vs_ChoroidPlexus	All_genes	Negative Regulation of Cytokine-Mediated Signaling Pathway (GO:0001960)	'1/67	0.0835984	0.125998	0	0	12.0655	29.9432	SLIT3	GO_Biological_Process_2025	1
Testis_vs_ChoroidPlexus	All_genes	Phosphatidylinositol Metabolic Process (GO:0046488)	'1/69	0.0859875	0.128981	0	0	11.7094	28.7297	PLCB1	GO_Biological_Process_2025	1
Testis_vs_ChoroidPlexus	All_genes	Cellular Response to Reactive Oxygen Species (GO:0034614)	'1/71	0.0883707	0.131306	0	0	11.3737	27.5951	PRPF38B	GO_Biological_Process_2025	1
Testis_vs_ChoroidPlexus	All_genes	Response to Ionizing Radiation (GO:0010212)	'1/71	0.0883707	0.131306	0	0	11.3737	27.5951	PRPF38B	GO_Biological_Process_2025	1
Testis_vs_ChoroidPlexus	All_genes	Regulation of G Protein-Coupled Receptor Signaling Pathway (GO:0008277)	'1/72	0.08956	0.132448	0	0	11.213	27.0551	PLCB1	GO_Biological_Process_2025	1
Testis_vs_ChoroidPlexus	All_genes	Calcium Ion Transmembrane Import Into Cytosol (GO:0097553)	'1/74	0.0919342	0.135324	0	0	10.9047	26.0259	PLCB1	GO_Biological_Process_2025	1
Testis_vs_ChoroidPlexus	All_genes	Gland Development (GO:0048732)	'1/75	0.0931191	0.13643	0	0	10.7568	25.5352	NRG1	GO_Biological_Process_2025	1
Testis_vs_ChoroidPlexus	All_genes	Regulation of Rho Protein Signal Transduction (GO:0035023)	'1/76	0.0943025	0.136891	0	0	10.6128	25.0595	PRPF38B	GO_Biological_Process_2025	1
Testis_vs_ChoroidPlexus	All_genes	Negative Regulation of Supramolecular Fiber Organization (GO:1902904)	'1/76	0.0943025	0.136891	0	0	10.6128	25.0595	LIMA1	GO_Biological_Process_2025	1
Testis_vs_ChoroidPlexus	All_genes	Cholesterol Homeostasis (GO:0042632)	'1/80	0.0990212	0.142815	0	0	10.0734	23.294	LIMA1	GO_Biological_Process_2025	1
Testis_vs_ChoroidPlexus	All_genes	Wound Healing (GO:0042060)	'1/81	0.100197	0.142815	0	0	9.947	22.8842	NRG1	GO_Biological_Process_2025	1
Testis_vs_ChoroidPlexus	All_genes	Positive Regulation of JNK Cascade (GO:0046330)	'1/81	0.100197	0.142815	0	0	9.947	22.8842	PLCB1	GO_Biological_Process_2025	1
Testis_vs_ChoroidPlexus	All_genes	Sterol Homeostasis (GO:0055092)	'1/81	0.100197	0.142815	0	0	9.947	22.8842	LIMA1	GO_Biological_Process_2025	1
Testis_vs_ChoroidPlexus	All_genes	Regulation of Cilium Assembly (GO:1902017)	'1/83	0.102545	0.144203	0	0	9.70341	22.0991	LIMA1	GO_Biological_Process_2025	1
Testis_vs_ChoroidPlexus	All_genes	Negative Regulation of Protein Phosphorylation (GO:0001933)	'1/83	0.102545	0.144203	0	0	9.70341	22.0991	PRKAG2	GO_Biological_Process_2025	1
Testis_vs_ChoroidPlexus	All_genes	Regulation of Protein Kinase Activity (GO:0045859)	'1/83	0.102545	0.144203	0	0	9.70341	22.0991	PRKAG2	GO_Biological_Process_2025	1
Testis_vs_ChoroidPlexus	All_genes	Positive Regulation of Synaptic Transmission (GO:0050806)	'1/84	0.103716	0.145203	0	0	9.58602	21.7229	NALCN	GO_Biological_Process_2025	1
Testis_vs_ChoroidPlexus	All_genes	Cell Morphogenesis Involved in Neuron Differentiation (GO:0048667)	'1/85	0.104886	0.146191	0	0	9.47143	21.3569	MAP1B	GO_Biological_Process_2025	1
Testis_vs_ChoroidPlexus	All_genes	Positive Regulation of Biosynthetic Process (GO:0009891)	'1/87	0.107222	0.148788	0	0	9.25023	20.6544	PRKAG2	GO_Biological_Process_2025	1
Testis_vs_ChoroidPlexus	All_genes	Regulation of Endothelial Cell Migration (GO:0010594)	'1/88	0.108388	0.149092	0	0	9.14345	20.3171	SMOC2	GO_Biological_Process_2025	1
Testis_vs_ChoroidPlexus	All_genes	Positive Regulation of Endothelial Cell Migration (GO:0010595)	'1/88	0.108388	0.149092	0	0	9.14345	20.3171	SMOC2	GO_Biological_Process_2025	1
Testis_vs_ChoroidPlexus	All_genes	Cellular Response to Hormone Stimulus (GO:0032870)	'1/89	0.109552	0.150039	0	0	9.03909	19.9887	SLIT3	GO_Biological_Process_2025	1
Testis_vs_ChoroidPlexus	All_genes	RNA Splicing (GO:0008380)	'1/92	0.113036	0.152817	0	0	8.73978	19.0532	SNRPN	GO_Biological_Process_2025	1
Testis_vs_ChoroidPlexus	All_genes	Positive Regulation of Response to Stimulus (GO:0048584)	'1/92	0.113036	0.152817	0	0	8.73978	19.0532	EYA2	GO_Biological_Process_2025	1
Testis_vs_ChoroidPlexus	All_genes	Positive Regulation of Cell Adhesion (GO:0045785)	'1/92	0.113036	0.152817	0	0	8.73978	19.0532	NRG1	GO_Biological_Process_2025	1
Testis_vs_ChoroidPlexus	All_genes	Positive Regulation of DNA Repair (GO:0045739)	'1/93	0.114194	0.153069	0	0	8.64435	18.757	EYA2	GO_Biological_Process_2025	1
Testis_vs_ChoroidPlexus	All_genes	Positive Regulation of Cellular Component Biogenesis (GO:0044089)	'1/93	0.114194	0.153069	0	0	8.64435	18.757	NRG1	GO_Biological_Process_2025	1
Testis_vs_ChoroidPlexus	All_genes	Positive Regulation of Hydrolase Activity (GO:0051345)	'1/98	0.119964	0.160122	0	0	8.1967	17.3816	PRPF38B	GO_Biological_Process_2025	1
Testis_vs_ChoroidPlexus	All_genes	Monoatomic Ion Transport (GO:0006811)	'1/100	0.122262	0.1625	0	0	8.0303	16.8764	SLC24A3	GO_Biological_Process_2025	1
Testis_vs_ChoroidPlexus	All_genes	Calcium Ion Homeostasis (GO:0055074)	'1/105	0.127982	0.167585	0	0	7.64231	15.7116	SLC24A3	GO_Biological_Process_2025	1
Testis_vs_ChoroidPlexus	All_genes	Organic Anion Transport (GO:0015711)	'1/105	0.127982	0.167585	0	0	7.64231	15.7116	SLC4A4	GO_Biological_Process_2025	1
Testis_vs_ChoroidPlexus	All_genes	Positive Regulation of Protein-Containing Complex Assembly (GO:0031334)	'1/105	0.127982	0.167585	0	0	7.64231	15.7116	NRG1	GO_Biological_Process_2025	1
Testis_vs_ChoroidPlexus	All_genes	Nervous System Development (GO:0007399)	'2/480	0.128216	0.167585	0	0	3.39888	6.98145	RBFOX1;NRG1	GO_Biological_Process_2025	2
Testis_vs_ChoroidPlexus	All_genes	Positive Regulation of Cell Growth (GO:0030307)	'1/107	0.13026	0.168855	0	0	7.49736	15.2813	NRG1	GO_Biological_Process_2025	1
Testis_vs_ChoroidPlexus	All_genes	Axon Development (GO:0061564)	'1/107	0.13026	0.168855	0	0	7.49736	15.2813	MAP1B	GO_Biological_Process_2025	1
Testis_vs_ChoroidPlexus	All_genes	Positive Regulation of Vasculature Development (GO:1904018)	'1/109	0.132532	0.170528	0	0	7.35778	14.8696	SMOC2	GO_Biological_Process_2025	1
Testis_vs_ChoroidPlexus	All_genes	External Encapsulating Structure Organization (GO:0045229)	'1/111	0.134798	0.170528	0	0	7.22327	14.4753	SMOC2	GO_Biological_Process_2025	1
Testis_vs_ChoroidPlexus	All_genes	Extracellular Structure Organization (GO:0043062)	'1/111	0.134798	0.170528	0	0	7.22327	14.4753	SMOC2	GO_Biological_Process_2025	1
Testis_vs_ChoroidPlexus	All_genes	Positive Regulation of GTPase Activity (GO:0043547)	'1/111	0.134798	0.170528	0	0	7.22327	14.4753	PRPF38B	GO_Biological_Process_2025	1
Testis_vs_ChoroidPlexus	All_genes	Regulation of G1/S Transition of Mitotic Cell Cycle (GO:2000045)	'1/111	0.134798	0.170528	0	0	7.22327	14.4753	PLCB1	GO_Biological_Process_2025	1
Testis_vs_ChoroidPlexus	All_genes	Positive Regulation of Cellular Component Organization (GO:0051130)	'1/111	0.134798	0.170528	0	0	7.22327	14.4753	NRG1	GO_Biological_Process_2025	1
Testis_vs_ChoroidPlexus	All_genes	Mitotic Cell Cycle Phase Transition (GO:0044772)	'1/113	0.137059	0.172694	0	0	7.09357	14.0974	PLCB1	GO_Biological_Process_2025	1
Testis_vs_ChoroidPlexus	All_genes	Negative Regulation of Growth (GO:0045926)	'1/115	0.139314	0.174142	0	0	6.96842	13.735	SLIT3	GO_Biological_Process_2025	1
Testis_vs_ChoroidPlexus	All_genes	Regulation of JNK Cascade (GO:0046328)	'1/115	0.139314	0.174142	0	0	6.96842	13.735	PLCB1	GO_Biological_Process_2025	1
Testis_vs_ChoroidPlexus	All_genes	Negative Regulation of DNA-templated Transcription (GO:0045892)	'3/1006	0.140322	0.174709	0	0	2.46708	4.84488	NRG1;CHD3;PLCB1	GO_Biological_Process_2025	3
Testis_vs_ChoroidPlexus	All_genes	Enzyme-Linked Receptor Protein Signaling Pathway (GO:0007167)	'1/121	0.146045	0.180408	0	0	6.618	12.732	NRG1	GO_Biological_Process_2025	1
Testis_vs_ChoroidPlexus	All_genes	Negative Regulation of Cell Growth (GO:0030308)	'1/121	0.146045	0.180408	0	0	6.618	12.732	SLIT3	GO_Biological_Process_2025	1
Testis_vs_ChoroidPlexus	All_genes	Regulation of Mitotic Cell Cycle (GO:0007346)	'1/124	0.149391	0.183821	0	0	6.45561	12.2733	SMOC2	GO_Biological_Process_2025	1
Testis_vs_ChoroidPlexus	All_genes	Negative Regulation of Cellular Process (GO:0048523)	'2/531	0.150881	0.184397	0	0	3.06317	5.79326	BTG4;SLIT3	GO_Biological_Process_2025	2
Testis_vs_ChoroidPlexus	All_genes	Positive Regulation of Angiogenesis (GO:0045766)	'1/126	0.151615	0.184397	0	0	6.35168	11.9819	SMOC2	GO_Biological_Process_2025	1
Testis_vs_ChoroidPlexus	All_genes	Regulation of Protein-Containing Complex Assembly (GO:0043254)	'1/126	0.151615	0.184397	0	0	6.35168	11.9819	NRG1	GO_Biological_Process_2025	1
Testis_vs_ChoroidPlexus	All_genes	Regulation of DNA Repair (GO:0006282)	'1/130	0.156046	0.189056	0	0	6.15349	11.4307	EYA2	GO_Biological_Process_2025	1
Testis_vs_ChoroidPlexus	All_genes	Neuron Projection Guidance (GO:0097485)	'1/132	0.158253	0.190996	0	0	6.05893	11.17	SLIT3	GO_Biological_Process_2025	1
Testis_vs_ChoroidPlexus	All_genes	Regulation of GTPase Activity (GO:0043087)	'1/134	0.160455	0.192914	0	0	5.96722	10.9185	PRPF38B	GO_Biological_Process_2025	1
Testis_vs_ChoroidPlexus	All_genes	Positive Regulation of RNA Biosynthetic Process (GO:1902680)	'2/555	0.161825	0.19382	0	0	2.92661	5.33007	CHD3;PLCB1	GO_Biological_Process_2025	2
Testis_vs_ChoroidPlexus	All_genes	Receptor-Mediated Endocytosis (GO:0006898)	'1/136	0.162651	0.194073	0	0	5.87822	10.6757	LRP1B	GO_Biological_Process_2025	1
Testis_vs_ChoroidPlexus	All_genes	Intracellular Calcium Ion Homeostasis (GO:0006874)	'1/140	0.167027	0.198542	0	0	5.70791	10.2149	SLC24A3	GO_Biological_Process_2025	1
Testis_vs_ChoroidPlexus	All_genes	Cellular Response to Starvation (GO:0009267)	'1/141	0.168118	0.199087	0	0	5.66686	10.1045	PRKAG2	GO_Biological_Process_2025	1
Testis_vs_ChoroidPlexus	All_genes	Regulation of Cell Adhesion (GO:0030155)	'1/142	0.169207	0.199626	0	0	5.62638	9.99602	NRG1	GO_Biological_Process_2025	1
Testis_vs_ChoroidPlexus	All_genes	Axon Guidance (GO:0007411)	'1/152	0.180023	0.211594	0	0	5.25113	9.00396	SLIT3	GO_Biological_Process_2025	1
Testis_vs_ChoroidPlexus	All_genes	Positive Regulation of ERK1 and ERK2 Cascade (GO:0070374)	'1/153	0.181097	0.212065	0	0	5.21632	8.91324	NRG1	GO_Biological_Process_2025	1
Testis_vs_ChoroidPlexus	All_genes	Regulation of Small GTPase Mediated Signal Transduction (GO:0051056)	'1/157	0.18538	0.215479	0	0	5.08154	8.56416	PRPF38B	GO_Biological_Process_2025	1
Testis_vs_ChoroidPlexus	All_genes	Neuron Projection Morphogenesis (GO:0048812)	'1/157	0.18538	0.215479	0	0	5.08154	8.56416	MAP1B	GO_Biological_Process_2025	1
Testis_vs_ChoroidPlexus	All_genes	Neuron Development (GO:0048666)	'1/159	0.187513	0.216362	0	0	5.01671	8.39749	MAP1B	GO_Biological_Process_2025	1
Testis_vs_ChoroidPlexus	All_genes	Regulation of Cellular Component Organization (GO:0051128)	'1/159	0.187513	0.216362	0	0	5.01671	8.39749	PRPF38B	GO_Biological_Process_2025	1
Testis_vs_ChoroidPlexus	All_genes	Brain Development (GO:0007420)	'1/170	0.199152	0.228952	0	0	4.68757	7.56429	NRG1	GO_Biological_Process_2025	1
Testis_vs_ChoroidPlexus	All_genes	Nitrogen Compound Transport (GO:0071705)	'1/172	0.20125	0.230523	0	0	4.63228	7.4265	LRP1B	GO_Biological_Process_2025	1
Testis_vs_ChoroidPlexus	All_genes	Metal Ion Transport (GO:0030001)	'1/180	0.209592	0.239209	0	0	4.42346	6.91206	SLC4A4	GO_Biological_Process_2025	1
Testis_vs_ChoroidPlexus	All_genes	Neuron Differentiation (GO:0030182)	'1/181	0.210629	0.239524	0	0	4.39867	6.85161	BTG4	GO_Biological_Process_2025	1
Testis_vs_ChoroidPlexus	All_genes	Extracellular Matrix Organization (GO:0030198)	'1/182	0.211665	0.239836	0	0	4.37414	6.79196	SMOC2	GO_Biological_Process_2025	1
Testis_vs_ChoroidPlexus	All_genes	Regulation of Cell Differentiation (GO:0045595)	'1/201	0.231094	0.260912	0	0	3.9548	5.79351	CHD3	GO_Biological_Process_2025	1
Testis_vs_ChoroidPlexus	All_genes	Negative Regulation of Macromolecule Biosynthetic Process (GO:0010558)	'1/202	0.232104	0.261117	0	0	3.93493	5.74724	SLC24A3	GO_Biological_Process_2025	1
Testis_vs_ChoroidPlexus	All_genes	Neuron Projection Development (GO:0031175)	'1/206	0.23613	0.264701	0	0	3.85737	5.56762	MAP1B	GO_Biological_Process_2025	1
Testis_vs_ChoroidPlexus	All_genes	Intracellular Monoatomic Cation Homeostasis (GO:0030003)	'1/210	0.240136	0.267455	0	0	3.78278	5.39632	SLC24A3	GO_Biological_Process_2025	1
Testis_vs_ChoroidPlexus	All_genes	Regulation of Signal Transduction (GO:0009966)	'1/211	0.241134	0.267455	0	0	3.76457	5.35474	PLCB1	GO_Biological_Process_2025	1
Testis_vs_ChoroidPlexus	All_genes	Regulation of Angiogenesis (GO:0045765)	'1/211	0.241134	0.267455	0	0	3.76457	5.35474	SMOC2	GO_Biological_Process_2025	1
Testis_vs_ChoroidPlexus	All_genes	Regulation of ERK1 and ERK2 Cascade (GO:0070372)	'1/223	0.253016	0.279649	0	0	3.55892	4.89104	NRG1	GO_Biological_Process_2025	1
Testis_vs_ChoroidPlexus	All_genes	Regulation of Cell Population Proliferation (GO:0042127)	'2/769	0.264071	0.290848	0	0	2.08681	2.77866	BTG4;NRG1	GO_Biological_Process_2025	2
Testis_vs_ChoroidPlexus	All_genes	Positive Regulation of Developmental Process (GO:0051094)	'1/245	0.274336	0.3011	0	0	3.23443	4.18341	PLCB1	GO_Biological_Process_2025	1
Testis_vs_ChoroidPlexus	All_genes	Positive Regulation of Programmed Cell Death (GO:0043068)	'1/248	0.277197	0.303185	0	0	3.19466	4.09882	PRPF38B	GO_Biological_Process_2025	1
Testis_vs_ChoroidPlexus	All_genes	Cytokine-Mediated Signaling Pathway (GO:0019221)	'1/255	0.283832	0.309325	0	0	3.10551	3.91099	PLCB1	GO_Biological_Process_2025	1
Testis_vs_ChoroidPlexus	All_genes	Positive Regulation of Signal Transduction (GO:0009967)	'1/256	0.284775	0.309325	0	0	3.09318	3.8852	SMOC2	GO_Biological_Process_2025	1
Testis_vs_ChoroidPlexus	All_genes	Chromatin Remodeling (GO:0006338)	'1/262	0.290408	0.31436	0	0	3.02115	3.73555	CHD3	GO_Biological_Process_2025	1
Testis_vs_ChoroidPlexus	All_genes	Cellular Component Assembly (GO:0022607)	'1/277	0.304305	0.328275	0	0	2.85478	3.3964	LIMA1	GO_Biological_Process_2025	1
Testis_vs_ChoroidPlexus	All_genes	Central Nervous System Development (GO:0007417)	'1/288	0.31433	0.337931	0	0	2.74383	3.17547	NRG1	GO_Biological_Process_2025	1
Testis_vs_ChoroidPlexus	All_genes	RNA Processing (GO:0006396)	'1/291	0.31704	0.339685	0	0	2.71503	3.11884	SNRPN	GO_Biological_Process_2025	1
Testis_vs_ChoroidPlexus	All_genes	Positive Regulation of Cell Differentiation (GO:0045597)	'1/297	0.322428	0.344288	0	0	2.65919	3.00987	PLCB1	GO_Biological_Process_2025	1
Testis_vs_ChoroidPlexus	All_genes	Regulation of Intracellular Signal Transduction (GO:1902531)	'1/302	0.326888	0.34787	0	0	2.61435	2.92321	PRPF38B	GO_Biological_Process_2025	1
Testis_vs_ChoroidPlexus	All_genes	Protein Transport (GO:0015031)	'1/308	0.332201	0.352335	0	0	2.56248	2.82388	LRP1B	GO_Biological_Process_2025	1
Testis_vs_ChoroidPlexus	All_genes	Positive Regulation of Apoptotic Process (GO:0043065)	'1/313	0.336599	0.355801	0	0	2.52077	2.74477	PRPF38B	GO_Biological_Process_2025	1
Testis_vs_ChoroidPlexus	All_genes	Protein-Containing Complex Assembly (GO:0065003)	'1/323	0.34531	0.362576	0	0	2.44124	2.5958	NRG1	GO_Biological_Process_2025	1
Testis_vs_ChoroidPlexus	All_genes	Chromatin Organization (GO:0006325)	'1/323	0.34531	0.362576	0	0	2.44124	2.5958	CHD3	GO_Biological_Process_2025	1
Testis_vs_ChoroidPlexus	All_genes	Positive Regulation of Cytokine Production (GO:0001819)	'1/325	0.347039	0.363181	0	0	2.42593	2.5674	PLCB1	GO_Biological_Process_2025	1
Testis_vs_ChoroidPlexus	All_genes	Positive Regulation of Cell Migration (GO:0030335)	'1/344	0.363248	0.378884	0	0	2.28933	2.31834	SMOC2	GO_Biological_Process_2025	1
Testis_vs_ChoroidPlexus	All_genes	Negative Regulation of Gene Expression (GO:0010629)	'1/364	0.379891	0.394936	0	0	2.16099	2.09156	SLC24A3	GO_Biological_Process_2025	1
Testis_vs_ChoroidPlexus	All_genes	Negative Regulation of Cell Population Proliferation (GO:0008285)	'1/379	0.392098	0.406286	0	0	2.07365	1.94144	BTG4	GO_Biological_Process_2025	1
Testis_vs_ChoroidPlexus	All_genes	Positive Regulation of Multicellular Organismal Process (GO:0051240)	'1/407	0.414269	0.427852	0	0	1.92788	1.69893	PLCB1	GO_Biological_Process_2025	1
Testis_vs_ChoroidPlexus	All_genes	Regulation of Gene Expression (GO:0010468)	'2/1127	0.43507	0.447784	0	0	1.39622	1.162	SLC24A3;CHD3	GO_Biological_Process_2025	2
Testis_vs_ChoroidPlexus	All_genes	Positive Regulation of Gene Expression (GO:0010628)	'1/436	0.436411	0.447784	0	0	1.79669	1.48976	SLC24A3	GO_Biological_Process_2025	1
Testis_vs_ChoroidPlexus	All_genes	Regulation of RNA Biosynthetic Process (GO:2001141)	'1/465	0.457748	0.468151	0	0	1.6819	1.3143	CHD3	GO_Biological_Process_2025	1
Testis_vs_ChoroidPlexus	All_genes	Positive Regulation of Cell Population Proliferation (GO:0008284)	'1/484	0.471303	0.480455	0	0	1.61416	1.21426	NRG1	GO_Biological_Process_2025	1
Testis_vs_ChoroidPlexus	All_genes	Positive Regulation of DNA-templated Transcription (GO:0045893)	'2/1274	0.499982	0.508047	0	0	1.22524	0.849312	CHD3;PLCB1	GO_Biological_Process_2025	2
Testis_vs_ChoroidPlexus	All_genes	Regulation of DNA-templated Transcription (GO:0006355)	'3/2139	0.536652	0.543554	0	0	1.08928	0.677972	NRG1;CHD3;PLCB1	GO_Biological_Process_2025	3
Testis_vs_ChoroidPlexus	All_genes	Positive Regulation of Cellular Process (GO:0048522)	'1/622	0.560431	0.56582	0	0	1.24657	0.721825	NRG1	GO_Biological_Process_2025	1
Testis_vs_ChoroidPlexus	All_genes	Regulation of Apoptotic Process (GO:0042981)	'1/704	0.606348	0.610222	0	0	1.0965	0.548581	PRPF38B	GO_Biological_Process_2025	1
Testis_vs_ChoroidPlexus	All_genes	Negative Regulation of Transcription by RNA Polymerase II (GO:0000122)	'1/732	0.620942	0.62292	0	0	1.05297	0.501757	CHD3	GO_Biological_Process_2025	1
Testis_vs_ChoroidPlexus	All_genes	Regulation of Transcription by RNA Polymerase II (GO:0006357)	'1/2250	0.955177	0.955177	0	0	0.315251	0.0144569	CHD3	GO_Biological_Process_2025	1
Testis_vs_ChoroidPlexus	Both_downregulated	Positive Regulation of Fibroblast Growth Factor Receptor Signaling Pathway (GO:0045743)	'1/6	0.00149922	0.024751	0	0	999.5	6499.56	SMOC2	GO_Biological_Process_2025	1
Testis_vs_ChoroidPlexus	Both_downregulated	Regulation of Vascular Wound Healing (GO:0061043)	'1/9	0.00224816	0.024751	0	0	624.594	3808.55	SMOC2	GO_Biological_Process_2025	1
Testis_vs_ChoroidPlexus	Both_downregulated	Positive Regulation of Vascular Endothelial Growth Factor Signaling Pathway (GO:1900748)	'1/11	0.00274721	0.024751	0	0	499.625	2946.37	SMOC2	GO_Biological_Process_2025	1
Testis_vs_ChoroidPlexus	Both_downregulated	Positive Regulation of Endothelial Cell Chemotaxis (GO:2001028)	'1/14	0.0034954	0.024751	0	0	384.269	2173.55	SMOC2	GO_Biological_Process_2025	1
Testis_vs_ChoroidPlexus	Both_downregulated	Regulation of Endothelial Cell Chemotaxis (GO:2001026)	'1/17	0.00424314	0.024751	0	0	312.172	1705.22	SMOC2	GO_Biological_Process_2025	1
Testis_vs_ChoroidPlexus	Both_downregulated	Regulation of Fibroblast Growth Factor Receptor Signaling Pathway (GO:0040036)	'1/21	0.00523944	0.024751	0	0	249.688	1311.24	SMOC2	GO_Biological_Process_2025	1
Testis_vs_ChoroidPlexus	Both_downregulated	Positive Regulation of mRNA Splicing, via Spliceosome (GO:0048026)	'1/23	0.00573729	0.024751	0	0	226.966	1171.32	TRA2A	GO_Biological_Process_2025	1
Testis_vs_ChoroidPlexus	Both_downregulated	Regulation of Vascular Endothelial Growth Factor Signaling Pathway (GO:1900746)	'1/25	0.00623494	0.024751	0	0	208.031	1056.3	SMOC2	GO_Biological_Process_2025	1
Testis_vs_ChoroidPlexus	Both_downregulated	Positive Regulation of mRNA Processing (GO:0050685)	'1/26	0.00648369	0.024751	0	0	199.7	1006.18	TRA2A	GO_Biological_Process_2025	1
Testis_vs_ChoroidPlexus	Both_downregulated	Positive Regulation of Mitotic Cell Cycle (GO:0045931)	'1/28	0.00698104	0.024751	0	0	184.889	917.891	SMOC2	GO_Biological_Process_2025	1
Testis_vs_ChoroidPlexus	Both_downregulated	Regulation of DNA Biosynthetic Process (GO:2000278)	'1/28	0.00698104	0.024751	0	0	184.889	917.891	SMOC2	GO_Biological_Process_2025	1
Testis_vs_ChoroidPlexus	Both_downregulated	Positive Regulation of RNA Splicing (GO:0033120)	'1/36	0.00896846	0.0291475	0	0	142.571	672.088	TRA2A	GO_Biological_Process_2025	1
Testis_vs_ChoroidPlexus	Both_downregulated	Positive Regulation of DNA Biosynthetic Process (GO:2000573)	'1/41	0.010209	0.0297654	0	0	124.719	571.772	SMOC2	GO_Biological_Process_2025	1
Testis_vs_ChoroidPlexus	Both_downregulated	Positive Regulation of Wound Healing (GO:0090303)	'1/44	0.0109527	0.0297654	0	0	116	523.644	SMOC2	GO_Biological_Process_2025	1
Testis_vs_ChoroidPlexus	Both_downregulated	Positive Regulation of Chemotaxis (GO:0050921)	'1/46	0.0114482	0.0297654	0	0	110.833	495.416	SMOC2	GO_Biological_Process_2025	1
Testis_vs_ChoroidPlexus	Both_downregulated	Positive Regulation of Cell Cycle (GO:0045787)	'1/60	0.0149116	0.0363471	0	0	84.4746	355.267	SMOC2	GO_Biological_Process_2025	1
Testis_vs_ChoroidPlexus	Both_downregulated	Regulation of Endothelial Cell Migration (GO:0010594)	'1/88	0.0218093	0.0465392	0	0	57.2069	218.84	SMOC2	GO_Biological_Process_2025	1
Testis_vs_ChoroidPlexus	Both_downregulated	Positive Regulation of Endothelial Cell Migration (GO:0010595)	'1/88	0.0218093	0.0465392	0	0	57.2069	218.84	SMOC2	GO_Biological_Process_2025	1
Testis_vs_ChoroidPlexus	Both_downregulated	Regulation of mRNA Splicing, via Spliceosome (GO:0048024)	'1/97	0.0240181	0.0465392	0	0	51.8203	193.235	TRA2A	GO_Biological_Process_2025	1
Testis_vs_ChoroidPlexus	Both_downregulated	Positive Regulation of DNA Metabolic Process (GO:0051054)	'1/108	0.0267124	0.0465392	0	0	46.4673	168.334	SMOC2	GO_Biological_Process_2025	1
Testis_vs_ChoroidPlexus	Both_downregulated	Positive Regulation of Vasculature Development (GO:1904018)	'1/109	0.0269571	0.0465392	0	0	46.0347	166.347	SMOC2	GO_Biological_Process_2025	1
Testis_vs_ChoroidPlexus	Both_downregulated	External Encapsulating Structure Organization (GO:0045229)	'1/111	0.0274462	0.0465392	0	0	45.1932	162.493	SMOC2	GO_Biological_Process_2025	1
Testis_vs_ChoroidPlexus	Both_downregulated	Extracellular Structure Organization (GO:0043062)	'1/111	0.0274462	0.0465392	0	0	45.1932	162.493	SMOC2	GO_Biological_Process_2025	1
Testis_vs_ChoroidPlexus	Both_downregulated	Regulation of Mitotic Cell Cycle (GO:0007346)	'1/124	0.0306208	0.0485292	0	0	40.3902	140.803	SMOC2	GO_Biological_Process_2025	1
Testis_vs_ChoroidPlexus	Both_downregulated	Positive Regulation of Angiogenesis (GO:0045766)	'1/126	0.0311085	0.0485292	0	0	39.74	137.909	SMOC2	GO_Biological_Process_2025	1
Testis_vs_ChoroidPlexus	Both_downregulated	RNA Splicing, via Transesterification Reactions With Bulged Adenosine as Nucleophile (GO:0000377)	'1/171	0.0420291	0.0622378	0	0	29.1544	92.4018	TRA2A	GO_Biological_Process_2025	1
Testis_vs_ChoroidPlexus	Both_downregulated	Neuron Differentiation (GO:0030182)	'1/181	0.0444425	0.0622378	0	0	27.5208	85.6877	BTG4	GO_Biological_Process_2025	1
Testis_vs_ChoroidPlexus	Both_downregulated	Extracellular Matrix Organization (GO:0030198)	'1/182	0.0446836	0.0622378	0	0	27.3674	85.062	SMOC2	GO_Biological_Process_2025	1
Testis_vs_ChoroidPlexus	Both_downregulated	Generation of Neurons (GO:0048699)	'1/192	0.0470916	0.0633301	0	0	25.9215	79.2072	BTG4	GO_Biological_Process_2025	1
Testis_vs_ChoroidPlexus	Both_downregulated	Regulation of Angiogenesis (GO:0045765)	'1/211	0.0516535	0.0649834	0	0	23.5536	69.7939	SMOC2	GO_Biological_Process_2025	1
Testis_vs_ChoroidPlexus	Both_downregulated	mRNA Splicing, via Spliceosome (GO:0000398)	'1/211	0.0516535	0.0649834	0	0	23.5536	69.7939	TRA2A	GO_Biological_Process_2025	1
Testis_vs_ChoroidPlexus	Both_downregulated	mRNA Processing (GO:0006397)	'1/226	0.0552426	0.0673269	0	0	21.9667	63.6159	TRA2A	GO_Biological_Process_2025	1
Testis_vs_ChoroidPlexus	Both_downregulated	Positive Regulation of Signal Transduction (GO:0009967)	'1/256	0.0623883	0.0737316	0	0	19.3529	53.6924	SMOC2	GO_Biological_Process_2025	1
Testis_vs_ChoroidPlexus	Both_downregulated	Regulation of Cell Cycle (GO:0051726)	'1/318	0.077019	0.0883453	0	0	15.5189	39.7859	BTG4	GO_Biological_Process_2025	1
Testis_vs_ChoroidPlexus	Both_downregulated	Positive Regulation of Cell Migration (GO:0030335)	'1/344	0.0830998	0.0925969	0	0	14.3236	35.633	SMOC2	GO_Biological_Process_2025	1
Testis_vs_ChoroidPlexus	Both_downregulated	Positive Regulation of Macromolecule Biosynthetic Process (GO:0010557)	'1/355	0.0856628	0.0928013	0	0	13.8708	34.0851	SMOC2	GO_Biological_Process_2025	1
Testis_vs_ChoroidPlexus	Both_downregulated	Negative Regulation of Cell Population Proliferation (GO:0008285)	'1/379	0.0912349	0.0961665	0	0	12.9742	31.0644	BTG4	GO_Biological_Process_2025	1
Testis_vs_ChoroidPlexus	Both_downregulated	Negative Regulation of Cellular Process (GO:0048523)	'1/531	0.125897	0.12921	0	0	9.1816	19.0269	BTG4	GO_Biological_Process_2025	1
Testis_vs_ChoroidPlexus	Both_downregulated	Regulation of Cell Population Proliferation (GO:0042127)	'1/769	0.17804	0.17804	0	0	6.25879	10.8011	BTG4	GO_Biological_Process_2025	1
Testis_vs_ChoroidPlexus	Both_upregulated	Axon Extension (GO:0048675)	'2/21	0.000124889	0.0132221	0	0	150.113	1349.23	MAP1B;SLIT3	GO_Biological_Process_2025	2
Testis_vs_ChoroidPlexus	Both_upregulated	Negative Regulation of Extrinsic Apoptotic Signaling Pathway in Absence of Ligand (GO:2001240)	'2/24	0.000163911	0.0132221	0	0	129.623	1129.82	EYA2;NRG1	GO_Biological_Process_2025	2
Testis_vs_ChoroidPlexus	Both_upregulated	Negative Regulation of Signal Transduction in Absence of Ligand (GO:1901099)	'2/24	0.000163911	0.0132221	0	0	129.623	1129.82	EYA2;NRG1	GO_Biological_Process_2025	2
Testis_vs_ChoroidPlexus	Both_upregulated	Regulation of Extrinsic Apoptotic Signaling Pathway in Absence of Ligand (GO:2001239)	'2/28	0.000224068	0.0135561	0	0	109.659	921.529	EYA2;NRG1	GO_Biological_Process_2025	2
Testis_vs_ChoroidPlexus	Both_upregulated	Regulation of Cell Growth (GO:0001558)	'3/222	0.000679047	0.0328659	0	0	20.8272	151.931	PRPF38B;NRG1;SLIT3	GO_Biological_Process_2025	3
Testis_vs_ChoroidPlexus	Both_upregulated	Negative Regulation of Extrinsic Apoptotic Signaling Pathway (GO:2001237)	'2/72	0.00148437	0.0445426	0	0	40.6408	264.684	EYA2;NRG1	GO_Biological_Process_2025	2
Testis_vs_ChoroidPlexus	Both_upregulated	Positive Regulation of Growth (GO:0045927)	'2/79	0.00178344	0.0445426	0	0	36.9332	233.758	NRG1;PLCB1	GO_Biological_Process_2025	2
Testis_vs_ChoroidPlexus	Both_upregulated	Vascular Transport (GO:0010232)	'2/84	0.00201318	0.0445426	0	0	34.6725	215.248	SLC24A3;SLC4A4	GO_Biological_Process_2025	2
Testis_vs_ChoroidPlexus	Both_upregulated	Transport Across Blood-Brain Barrier (GO:0150104)	'2/86	0.00210881	0.0445426	0	0	33.8435	208.531	SLC24A3;SLC4A4	GO_Biological_Process_2025	2
Testis_vs_ChoroidPlexus	Both_upregulated	Sodium Ion Transmembrane Transport (GO:0035725)	'2/87	0.00215742	0.0445426	0	0	33.4437	205.306	SLC24A3;SLC4A4	GO_Biological_Process_2025	2
Testis_vs_ChoroidPlexus	Both_upregulated	Sodium Ion Transport (GO:0006814)	'2/96	0.00261874	0.0445426	0	0	30.228	179.707	SLC24A3;SLC4A4	GO_Biological_Process_2025	2
Testis_vs_ChoroidPlexus	Both_upregulated	ERBB4 Signaling Pathway (GO:0038130)	'1/5	0.00399395	0.0445426	0	0	333	1839.15	NRG1	GO_Biological_Process_2025	1
Testis_vs_ChoroidPlexus	Both_upregulated	Ventricular Cardiac Muscle Cell Differentiation (GO:0055012)	'1/5	0.00399395	0.0445426	0	0	333	1839.15	NRG1	GO_Biological_Process_2025	1
Testis_vs_ChoroidPlexus	Both_upregulated	Activation of Transmembrane Receptor Protein Tyrosine Kinase Activity (GO:0007171)	'1/5	0.00399395	0.0445426	0	0	333	1839.15	NRG1	GO_Biological_Process_2025	1
Testis_vs_ChoroidPlexus	Both_upregulated	Negative Regulation of Synapse Assembly (GO:0051964)	'1/5	0.00399395	0.0445426	0	0	333	1839.15	SLIT3	GO_Biological_Process_2025	1
Testis_vs_ChoroidPlexus	Both_upregulated	Negative Regulation of Synapse Organization (GO:1905809)	'1/5	0.00399395	0.0445426	0	0	333	1839.15	SLIT3	GO_Biological_Process_2025	1
Testis_vs_ChoroidPlexus	Both_upregulated	Negative Regulation of Actin Filament Depolymerization (GO:0030835)	'1/5	0.00399395	0.0445426	0	0	333	1839.15	LIMA1	GO_Biological_Process_2025	1
Testis_vs_ChoroidPlexus	Both_upregulated	Negative Regulation of Cellular Extravasation (GO:0002692)	'1/5	0.00399395	0.0445426	0	0	333	1839.15	PLCB1	GO_Biological_Process_2025	1
Testis_vs_ChoroidPlexus	Both_upregulated	Negative Regulation of Chemokine-Mediated Signaling Pathway (GO:0070100)	'1/5	0.00399395	0.0445426	0	0	333	1839.15	SLIT3	GO_Biological_Process_2025	1
Testis_vs_ChoroidPlexus	Both_upregulated	Cardiac Muscle Cell Myoblast Differentiation (GO:0060379)	'1/6	0.00479094	0.0445426	0	0	266.387	1422.78	NRG1	GO_Biological_Process_2025	1
Testis_vs_ChoroidPlexus	Both_upregulated	Regulation of Striated Muscle Cell Differentiation (GO:0051153)	'1/6	0.00479094	0.0445426	0	0	266.387	1422.78	NRG1	GO_Biological_Process_2025	1
Testis_vs_ChoroidPlexus	Both_upregulated	Neuron Projection Extension Involved in Neuron Projection Guidance (GO:1902284)	'1/6	0.00479094	0.0445426	0	0	266.387	1422.78	SLIT3	GO_Biological_Process_2025	1
Testis_vs_ChoroidPlexus	Both_upregulated	Axon Extension Involved in Axon Guidance (GO:0048846)	'1/6	0.00479094	0.0445426	0	0	266.387	1422.78	SLIT3	GO_Biological_Process_2025	1
Testis_vs_ChoroidPlexus	Both_upregulated	Negative Regulation of Cardiac Muscle Cell Apoptotic Process (GO:0010667)	'1/6	0.00479094	0.0445426	0	0	266.387	1422.78	NRG1	GO_Biological_Process_2025	1
Testis_vs_ChoroidPlexus	Both_upregulated	Regulation of Protein Depolymerization (GO:1901879)	'1/6	0.00479094	0.0445426	0	0	266.387	1422.78	MAP1B	GO_Biological_Process_2025	1
Testis_vs_ChoroidPlexus	Both_upregulated	Plasma Membrane Bounded Cell Projection Organization (GO:0120036)	'2/141	0.00555067	0.0445426	0	0	20.3957	105.932	LIMA1;MAP1B	GO_Biological_Process_2025	2
Testis_vs_ChoroidPlexus	Both_upregulated	Regulation of Chemokine-Mediated Signaling Pathway (GO:0070099)	'1/7	0.00558734	0.0445426	0	0	221.978	1151.45	SLIT3	GO_Biological_Process_2025	1
Testis_vs_ChoroidPlexus	Both_upregulated	Negative Regulation of RNA Biosynthetic Process (GO:1902679)	'3/470	0.00574929	0.0445426	0	0	9.64437	49.7522	NRG1;CHD3;PLCB1	GO_Biological_Process_2025	3
Testis_vs_ChoroidPlexus	Both_upregulated	Cardioblast Differentiation (GO:0010002)	'1/8	0.00638314	0.0445426	0	0	190.257	961.578	NRG1	GO_Biological_Process_2025	1
Testis_vs_ChoroidPlexus	Both_upregulated	Regulation of Fertilization (GO:0080154)	'1/8	0.00638314	0.0445426	0	0	190.257	961.578	PLCB1	GO_Biological_Process_2025	1
Testis_vs_ChoroidPlexus	Both_upregulated	Ventricular Trabecula Myocardium Morphogenesis (GO:0003222)	'1/8	0.00638314	0.0445426	0	0	190.257	961.578	NRG1	GO_Biological_Process_2025	1
Testis_vs_ChoroidPlexus	Both_upregulated	Interleukin-12-Mediated Signaling Pathway (GO:0035722)	'1/8	0.00638314	0.0445426	0	0	190.257	961.578	PLCB1	GO_Biological_Process_2025	1
Testis_vs_ChoroidPlexus	Both_upregulated	Cellular Response to Interleukin-15 (GO:0071350)	'1/9	0.00717835	0.0445426	0	0	166.467	821.794	PLCB1	GO_Biological_Process_2025	1
Testis_vs_ChoroidPlexus	Both_upregulated	Positive Regulation of Protein Autophosphorylation (GO:0031954)	'1/9	0.00717835	0.0445426	0	0	166.467	821.794	NRG1	GO_Biological_Process_2025	1
Testis_vs_ChoroidPlexus	Both_upregulated	Positive Regulation of Acrosome Reaction (GO:2000344)	'1/9	0.00717835	0.0445426	0	0	166.467	821.794	PLCB1	GO_Biological_Process_2025	1
Testis_vs_ChoroidPlexus	Both_upregulated	Negative Regulation of Striated Muscle Cell Apoptotic Process (GO:0010664)	'1/9	0.00717835	0.0445426	0	0	166.467	821.794	NRG1	GO_Biological_Process_2025	1
Testis_vs_ChoroidPlexus	Both_upregulated	Interleukin-15-Mediated Signaling Pathway (GO:0035723)	'1/9	0.00717835	0.0445426	0	0	166.467	821.794	PLCB1	GO_Biological_Process_2025	1
Testis_vs_ChoroidPlexus	Both_upregulated	Intestinal Cholesterol Absorption (GO:0030299)	'1/9	0.00717835	0.0445426	0	0	166.467	821.794	LIMA1	GO_Biological_Process_2025	1
Testis_vs_ChoroidPlexus	Both_upregulated	Neuroepithelial Cell Differentiation (GO:0060563)	'1/9	0.00717835	0.0445426	0	0	166.467	821.794	MAP1B	GO_Biological_Process_2025	1
Testis_vs_ChoroidPlexus	Both_upregulated	Cellular Response to Interleukin-12 (GO:0071349)	'1/10	0.00797296	0.0463977	0	0	147.963	714.913	PLCB1	GO_Biological_Process_2025	1
Testis_vs_ChoroidPlexus	Both_upregulated	Insulin-Like Growth Factor Receptor Signaling Pathway (GO:0048009)	'1/11	0.00876697	0.0463977	0	0	133.16	630.747	PLCB1	GO_Biological_Process_2025	1
Testis_vs_ChoroidPlexus	Both_upregulated	Intestinal Lipid Absorption (GO:0098856)	'1/11	0.00876697	0.0463977	0	0	133.16	630.747	LIMA1	GO_Biological_Process_2025	1
Testis_vs_ChoroidPlexus	Both_upregulated	Regulation of Cardiac Muscle Cell Apoptotic Process (GO:0010665)	'1/11	0.00876697	0.0463977	0	0	133.16	630.747	NRG1	GO_Biological_Process_2025	1
Testis_vs_ChoroidPlexus	Both_upregulated	Positive Regulation of Glycoprotein Biosynthetic Process (GO:0010560)	'1/12	0.00956039	0.0463977	0	0	121.048	562.891	PLCB1	GO_Biological_Process_2025	1
Testis_vs_ChoroidPlexus	Both_upregulated	Regulation of Actin Filament Depolymerization (GO:0030834)	'1/12	0.00956039	0.0463977	0	0	121.048	562.891	LIMA1	GO_Biological_Process_2025	1
Testis_vs_ChoroidPlexus	Both_upregulated	Sodium Ion Export Across Plasma Membrane (GO:0036376)	'1/12	0.00956039	0.0463977	0	0	121.048	562.891	SLC4A4	GO_Biological_Process_2025	1
Testis_vs_ChoroidPlexus	Both_upregulated	Cardiocyte Differentiation (GO:0035051)	'1/13	0.0103532	0.0463977	0	0	110.956	507.118	NRG1	GO_Biological_Process_2025	1
Testis_vs_ChoroidPlexus	Both_upregulated	ERBB2 Signaling Pathway (GO:0038128)	'1/13	0.0103532	0.0463977	0	0	110.956	507.118	NRG1	GO_Biological_Process_2025	1
Testis_vs_ChoroidPlexus	Both_upregulated	Activation of Protein Kinase B Activity (GO:0032148)	'1/13	0.0103532	0.0463977	0	0	110.956	507.118	NRG1	GO_Biological_Process_2025	1
Testis_vs_ChoroidPlexus	Both_upregulated	Motor Neuron Axon Guidance (GO:0008045)	'1/13	0.0103532	0.0463977	0	0	110.956	507.118	SLIT3	GO_Biological_Process_2025	1
Testis_vs_ChoroidPlexus	Both_upregulated	Negative Regulation of Secretion (GO:0051048)	'1/13	0.0103532	0.0463977	0	0	110.956	507.118	NRG1	GO_Biological_Process_2025	1
Testis_vs_ChoroidPlexus	Both_upregulated	Regulation of Acrosome Reaction (GO:0060046)	'1/13	0.0103532	0.0463977	0	0	110.956	507.118	PLCB1	GO_Biological_Process_2025	1
Testis_vs_ChoroidPlexus	Both_upregulated	Atrioventricular Valve Development (GO:0003171)	'1/13	0.0103532	0.0463977	0	0	110.956	507.118	SLIT3	GO_Biological_Process_2025	1
Testis_vs_ChoroidPlexus	Both_upregulated	Regulation of Cell Fate Commitment (GO:0010453)	'1/13	0.0103532	0.0463977	0	0	110.956	507.118	CHD3	GO_Biological_Process_2025	1
Testis_vs_ChoroidPlexus	Both_upregulated	Axonogenesis (GO:0007409)	'2/200	0.0108884	0.0479091	0	0	14.2756	64.5266	MAP1B;SLIT3	GO_Biological_Process_2025	2
Testis_vs_ChoroidPlexus	Both_upregulated	Positive Regulation of Cardiac Muscle Cell Proliferation (GO:0060045)	'1/14	0.0111454	0.0481642	0	0	102.415	460.534	NRG1	GO_Biological_Process_2025	1
Testis_vs_ChoroidPlexus	Both_upregulated	Negative Regulation of Mononuclear Cell Migration (GO:0071676)	'1/15	0.0119371	0.0489622	0	0	95.0952	421.092	PLCB1	GO_Biological_Process_2025	1
Testis_vs_ChoroidPlexus	Both_upregulated	Digestive System Development (GO:0055123)	'1/15	0.0119371	0.0489622	0	0	95.0952	421.092	CLMP	GO_Biological_Process_2025	1
Testis_vs_ChoroidPlexus	Both_upregulated	Stem Cell Development (GO:0048864)	'1/15	0.0119371	0.0489622	0	0	95.0952	421.092	NRG1	GO_Biological_Process_2025	1
Testis_vs_ChoroidPlexus	Both_upregulated	Ruffle Organization (GO:0031529)	'1/16	0.0127281	0.0513367	0	0	88.7511	387.305	LIMA1	GO_Biological_Process_2025	1
Testis_vs_ChoroidPlexus	Both_upregulated	Regulation of Secretion (GO:0051046)	'1/17	0.0135186	0.0517334	0	0	83.2	358.067	NRG1	GO_Biological_Process_2025	1
Testis_vs_ChoroidPlexus	Both_upregulated	G Protein-Coupled Acetylcholine Receptor Signaling Pathway (GO:0007213)	'1/17	0.0135186	0.0517334	0	0	83.2	358.067	PLCB1	GO_Biological_Process_2025	1
Testis_vs_ChoroidPlexus	Both_upregulated	Positive Regulation of Cardiac Muscle Tissue Growth (GO:0055023)	'1/17	0.0135186	0.0517334	0	0	83.2	358.067	NRG1	GO_Biological_Process_2025	1
Testis_vs_ChoroidPlexus	Both_upregulated	Positive Regulation of Muscle Cell Differentiation (GO:0051149)	'1/18	0.0143084	0.0517334	0	0	78.302	332.541	NRG1	GO_Biological_Process_2025	1
Testis_vs_ChoroidPlexus	Both_upregulated	Negative Regulation of Nervous System Development (GO:0051961)	'1/18	0.0143084	0.0517334	0	0	78.302	332.541	SLIT3	GO_Biological_Process_2025	1
Testis_vs_ChoroidPlexus	Both_upregulated	Neural Crest Cell Differentiation (GO:0014033)	'1/18	0.0143084	0.0517334	0	0	78.302	332.541	NRG1	GO_Biological_Process_2025	1
Testis_vs_ChoroidPlexus	Both_upregulated	Positive Regulation of Glycolytic Process (GO:0045821)	'1/19	0.0150977	0.0517334	0	0	73.9481	310.08	SLC4A4	GO_Biological_Process_2025	1
Testis_vs_ChoroidPlexus	Both_upregulated	Positive Regulation of Purine Nucleotide Catabolic Process (GO:0033123)	'1/19	0.0150977	0.0517334	0	0	73.9481	310.08	SLC4A4	GO_Biological_Process_2025	1
Testis_vs_ChoroidPlexus	Both_upregulated	Positive Regulation of Embryonic Development (GO:0040019)	'1/19	0.0150977	0.0517334	0	0	73.9481	310.08	PLCB1	GO_Biological_Process_2025	1
Testis_vs_ChoroidPlexus	Both_upregulated	Heart Trabecula Morphogenesis (GO:0061384)	'1/20	0.0158863	0.0517334	0	0	70.0526	290.179	NRG1	GO_Biological_Process_2025	1
Testis_vs_ChoroidPlexus	Both_upregulated	Interleukin-1-Mediated Signaling Pathway (GO:0070498)	'1/20	0.0158863	0.0517334	0	0	70.0526	290.179	PLCB1	GO_Biological_Process_2025	1
Testis_vs_ChoroidPlexus	Both_upregulated	Atrioventricular Valve Morphogenesis (GO:0003181)	'1/20	0.0158863	0.0517334	0	0	70.0526	290.179	SLIT3	GO_Biological_Process_2025	1
Testis_vs_ChoroidPlexus	Both_upregulated	Bicarbonate Transport (GO:0015701)	'1/20	0.0158863	0.0517334	0	0	70.0526	290.179	SLC4A4	GO_Biological_Process_2025	1
Testis_vs_ChoroidPlexus	Both_upregulated	Striated Muscle Cell Differentiation (GO:0051146)	'1/20	0.0158863	0.0517334	0	0	70.0526	290.179	NRG1	GO_Biological_Process_2025	1
Testis_vs_ChoroidPlexus	Both_upregulated	Negative Regulation of Cilium Assembly (GO:1902018)	'1/21	0.0166744	0.0517334	0	0	66.5467	272.434	LIMA1	GO_Biological_Process_2025	1
Testis_vs_ChoroidPlexus	Both_upregulated	Peripheral Nervous System Development (GO:0007422)	'1/21	0.0166744	0.0517334	0	0	66.5467	272.434	NRG1	GO_Biological_Process_2025	1
Testis_vs_ChoroidPlexus	Both_upregulated	Myoblast Differentiation (GO:0045445)	'1/21	0.0166744	0.0517334	0	0	66.5467	272.434	NRG1	GO_Biological_Process_2025	1
Testis_vs_ChoroidPlexus	Both_upregulated	Regulation of Cardiac Muscle Cell Proliferation (GO:0060043)	'1/21	0.0166744	0.0517334	0	0	66.5467	272.434	NRG1	GO_Biological_Process_2025	1
Testis_vs_ChoroidPlexus	Both_upregulated	Mammary Gland Development (GO:0030879)	'1/22	0.0174619	0.0534909	0	0	63.3746	256.524	NRG1	GO_Biological_Process_2025	1
Testis_vs_ChoroidPlexus	Both_upregulated	Phosphatidylinositol-Mediated Signaling (GO:0048015)	'1/23	0.0182488	0.0545211	0	0	60.4909	242.185	PLCB1	GO_Biological_Process_2025	1
Testis_vs_ChoroidPlexus	Both_upregulated	Negative Regulation of Cell Junction Assembly (GO:1901889)	'1/23	0.0182488	0.0545211	0	0	60.4909	242.185	SLIT3	GO_Biological_Process_2025	1
Testis_vs_ChoroidPlexus	Both_upregulated	Response to Ketone (GO:1901654)	'1/24	0.0190351	0.0554999	0	0	57.858	229.203	SLIT3	GO_Biological_Process_2025	1
Testis_vs_ChoroidPlexus	Both_upregulated	Positive Regulation of Striated Muscle Cell Differentiation (GO:0051155)	'1/24	0.0190351	0.0554999	0	0	57.858	229.203	NRG1	GO_Biological_Process_2025	1
Testis_vs_ChoroidPlexus	Both_upregulated	Negative Regulation of Protein Depolymerization (GO:1901880)	'1/25	0.0198208	0.0557748	0	0	55.4444	217.399	LIMA1	GO_Biological_Process_2025	1
Testis_vs_ChoroidPlexus	Both_upregulated	Response to Glucocorticoid (GO:0051384)	'1/25	0.0198208	0.0557748	0	0	55.4444	217.399	SLIT3	GO_Biological_Process_2025	1
Testis_vs_ChoroidPlexus	Both_upregulated	Negative Chemotaxis (GO:0050919)	'1/25	0.0198208	0.0557748	0	0	55.4444	217.399	SLIT3	GO_Biological_Process_2025	1
Testis_vs_ChoroidPlexus	Both_upregulated	Positive Regulation of Rho Protein Signal Transduction (GO:0035025)	'1/26	0.0206059	0.0573176	0	0	53.224	206.625	PRPF38B	GO_Biological_Process_2025	1
Testis_vs_ChoroidPlexus	Both_upregulated	Cardiac Muscle Cell Differentiation (GO:0055007)	'1/27	0.0213905	0.0581628	0	0	51.1744	196.756	NRG1	GO_Biological_Process_2025	1
Testis_vs_ChoroidPlexus	Both_upregulated	Regulation of Microtubule Polymerization or Depolymerization (GO:0031110)	'1/27	0.0213905	0.0581628	0	0	51.1744	196.756	MAP1B	GO_Biological_Process_2025	1
Testis_vs_ChoroidPlexus	Both_upregulated	Ventricular Septum Morphogenesis (GO:0060412)	'1/28	0.0221744	0.0583283	0	0	49.2765	187.685	SLIT3	GO_Biological_Process_2025	1
Testis_vs_ChoroidPlexus	Both_upregulated	Positive Regulation of ATP Metabolic Process (GO:1903580)	'1/28	0.0221744	0.0583283	0	0	49.2765	187.685	SLC4A4	GO_Biological_Process_2025	1
Testis_vs_ChoroidPlexus	Both_upregulated	Regulation of Microtubule Depolymerization (GO:0031114)	'1/28	0.0221744	0.0583283	0	0	49.2765	187.685	MAP1B	GO_Biological_Process_2025	1
Testis_vs_ChoroidPlexus	Both_upregulated	Cell Surface Receptor Protein Tyrosine Kinase Signaling Pathway (GO:0007169)	'2/296	0.0228477	0.0584819	0	0	9.56754	36.1548	NRG1;PLCB1	GO_Biological_Process_2025	2
Testis_vs_ChoroidPlexus	Both_upregulated	Negative Regulation of Cytoskeleton Organization (GO:0051494)	'1/29	0.0229578	0.0584819	0	0	47.5143	179.324	LIMA1	GO_Biological_Process_2025	1
Testis_vs_ChoroidPlexus	Both_upregulated	Regulation of Supramolecular Fiber Organization (GO:1902903)	'1/29	0.0229578	0.0584819	0	0	47.5143	179.324	MAP1B	GO_Biological_Process_2025	1
Testis_vs_ChoroidPlexus	Both_upregulated	Monoatomic Cation Transmembrane Transport (GO:0098655)	'2/304	0.0240123	0.0605309	0	0	9.31031	34.7199	SLC24A3;SLC4A4	GO_Biological_Process_2025	2
Testis_vs_ChoroidPlexus	Both_upregulated	Inorganic Cation Transmembrane Transport (GO:0098662)	'2/307	0.0244553	0.0610122	0	0	9.21733	34.2047	SLC24A3;SLC4A4	GO_Biological_Process_2025	2
Testis_vs_ChoroidPlexus	Both_upregulated	Response to Alcohol (GO:0097305)	'1/32	0.0253043	0.0618886	0	0	42.9097	157.77	SLIT3	GO_Biological_Process_2025	1
Testis_vs_ChoroidPlexus	Both_upregulated	Positive Regulation of Interleukin-12 Production (GO:0032735)	'1/33	0.0260853	0.0618886	0	0	41.5667	151.568	PLCB1	GO_Biological_Process_2025	1
Testis_vs_ChoroidPlexus	Both_upregulated	Ventricular Cardiac Muscle Tissue Morphogenesis (GO:0055010)	'1/33	0.0260853	0.0618886	0	0	41.5667	151.568	NRG1	GO_Biological_Process_2025	1
Testis_vs_ChoroidPlexus	Both_upregulated	Positive Regulation of G1/S Transition of Mitotic Cell Cycle (GO:1900087)	'1/33	0.0260853	0.0618886	0	0	41.5667	151.568	PLCB1	GO_Biological_Process_2025	1
Testis_vs_ChoroidPlexus	Both_upregulated	Actin Filament Bundle Assembly (GO:0051017)	'1/33	0.0260853	0.0618886	0	0	41.5667	151.568	LIMA1	GO_Biological_Process_2025	1
Testis_vs_ChoroidPlexus	Both_upregulated	Regulation of Developmental Growth (GO:0048638)	'1/34	0.0268657	0.0619191	0	0	40.3051	145.78	PLCB1	GO_Biological_Process_2025	1
Testis_vs_ChoroidPlexus	Both_upregulated	Actin Filament Bundle Organization (GO:0061572)	'1/34	0.0268657	0.0619191	0	0	40.3051	145.78	LIMA1	GO_Biological_Process_2025	1
Testis_vs_ChoroidPlexus	Both_upregulated	Positive Regulation of Carbohydrate Metabolic Process (GO:0045913)	'1/34	0.0268657	0.0619191	0	0	40.3051	145.78	SLC4A4	GO_Biological_Process_2025	1
Testis_vs_ChoroidPlexus	Both_upregulated	Cellular Response to Hydrogen Peroxide (GO:0070301)	'1/35	0.0276455	0.0625254	0	0	39.1176	140.365	PRPF38B	GO_Biological_Process_2025	1
Testis_vs_ChoroidPlexus	Both_upregulated	Acetylcholine Receptor Signaling Pathway (GO:0095500)	'1/35	0.0276455	0.0625254	0	0	39.1176	140.365	PLCB1	GO_Biological_Process_2025	1
Testis_vs_ChoroidPlexus	Both_upregulated	Glutamate Receptor Signaling Pathway (GO:0007215)	'1/36	0.0284248	0.0631082	0	0	37.9981	135.292	PLCB1	GO_Biological_Process_2025	1
Testis_vs_ChoroidPlexus	Both_upregulated	Negative Regulation of Plasma Membrane Bounded Cell Projection Assembly (GO:0120033)	'1/36	0.0284248	0.0631082	0	0	37.9981	135.292	LIMA1	GO_Biological_Process_2025	1
Testis_vs_ChoroidPlexus	Both_upregulated	Ventricular Septum Development (GO:0003281)	'1/38	0.0299815	0.063645	0	0	35.9405	126.05	SLIT3	GO_Biological_Process_2025	1
Testis_vs_ChoroidPlexus	Both_upregulated	Positive Regulation of Reproductive Process (GO:2000243)	'1/38	0.0299815	0.063645	0	0	35.9405	126.05	PLCB1	GO_Biological_Process_2025	1
Testis_vs_ChoroidPlexus	Both_upregulated	Negative Regulation of Transport (GO:0051051)	'1/38	0.0299815	0.063645	0	0	35.9405	126.05	NRG1	GO_Biological_Process_2025	1
Testis_vs_ChoroidPlexus	Both_upregulated	Aortic Valve Morphogenesis (GO:0003180)	'1/38	0.0299815	0.063645	0	0	35.9405	126.05	SLIT3	GO_Biological_Process_2025	1
Testis_vs_ChoroidPlexus	Both_upregulated	Neuron Projection Extension (GO:1990138)	'1/38	0.0299815	0.063645	0	0	35.9405	126.05	MAP1B	GO_Biological_Process_2025	1
Testis_vs_ChoroidPlexus	Both_upregulated	Negative Regulation of G Protein-Coupled Receptor Signaling Pathway (GO:0045744)	'1/39	0.030759	0.0645266	0	0	34.993	121.831	SLIT3	GO_Biological_Process_2025	1
Testis_vs_ChoroidPlexus	Both_upregulated	G2/M Transition of Mitotic Cell Cycle (GO:0000086)	'1/40	0.0315359	0.0645266	0	0	34.094	117.85	PLCB1	GO_Biological_Process_2025	1
Testis_vs_ChoroidPlexus	Both_upregulated	Negative Regulation of Sequestering of Calcium Ion (GO:0051283)	'1/40	0.0315359	0.0645266	0	0	34.094	117.85	PLCB1	GO_Biological_Process_2025	1
Testis_vs_ChoroidPlexus	Both_upregulated	Positive Regulation of Myoblast Differentiation (GO:0045663)	'1/41	0.0323122	0.0645266	0	0	33.24	114.09	PLCB1	GO_Biological_Process_2025	1
Testis_vs_ChoroidPlexus	Both_upregulated	Aortic Valve Development (GO:0003176)	'1/41	0.0323122	0.0645266	0	0	33.24	114.09	SLIT3	GO_Biological_Process_2025	1
Testis_vs_ChoroidPlexus	Both_upregulated	Regulation of Glycolytic Process (GO:0006110)	'1/42	0.033088	0.0645266	0	0	32.4276	110.532	SLC4A4	GO_Biological_Process_2025	1
Testis_vs_ChoroidPlexus	Both_upregulated	Response to Hydrogen Peroxide (GO:0042542)	'1/42	0.033088	0.0645266	0	0	32.4276	110.532	PRPF38B	GO_Biological_Process_2025	1
Testis_vs_ChoroidPlexus	Both_upregulated	Digestive Tract Development (GO:0048565)	'1/42	0.033088	0.0645266	0	0	32.4276	110.532	CLMP	GO_Biological_Process_2025	1
Testis_vs_ChoroidPlexus	Both_upregulated	Positive Regulation of MAPK Cascade (GO:0043410)	'2/362	0.0331638	0.0645266	0	0	7.7873	26.5259	NRG1;PLCB1	GO_Biological_Process_2025	2
Testis_vs_ChoroidPlexus	Both_upregulated	Cell Cycle G2/M Phase Transition (GO:0044839)	'1/43	0.0338631	0.0645266	0	0	31.654	107.162	PLCB1	GO_Biological_Process_2025	1
Testis_vs_ChoroidPlexus	Both_upregulated	Release of Sequestered Calcium Ion Into Cytosol (GO:0051209)	'1/43	0.0338631	0.0645266	0	0	31.654	107.162	PLCB1	GO_Biological_Process_2025	1
Testis_vs_ChoroidPlexus	Both_upregulated	Negative Regulation of Organelle Assembly (GO:1902116)	'1/43	0.0338631	0.0645266	0	0	31.654	107.162	LIMA1	GO_Biological_Process_2025	1
Testis_vs_ChoroidPlexus	Both_upregulated	Neural Crest Cell Development (GO:0014032)	'1/43	0.0338631	0.0645266	0	0	31.654	107.162	NRG1	GO_Biological_Process_2025	1
Testis_vs_ChoroidPlexus	Both_upregulated	Positive Regulation of Cell Cycle G1/S Phase Transition (GO:1902808)	'1/44	0.0346377	0.0654869	0	0	30.9163	103.966	PLCB1	GO_Biological_Process_2025	1
Testis_vs_ChoroidPlexus	Both_upregulated	Cellular Response to Radiation (GO:0071478)	'1/47	0.0369579	0.0693319	0	0	28.8957	95.2971	PRPF38B	GO_Biological_Process_2025	1
Testis_vs_ChoroidPlexus	Both_upregulated	Regulation of Stem Cell Differentiation (GO:2000736)	'1/49	0.0385018	0.0711255	0	0	27.6889	90.1841	CHD3	GO_Biological_Process_2025	1
Testis_vs_ChoroidPlexus	Both_upregulated	Activation of Protein Kinase Activity (GO:0032147)	'1/49	0.0385018	0.0711255	0	0	27.6889	90.1841	NRG1	GO_Biological_Process_2025	1
Testis_vs_ChoroidPlexus	Both_upregulated	Regulation of Interleukin-12 Production (GO:0032655)	'1/50	0.0392729	0.071459	0	0	27.1224	87.8013	PLCB1	GO_Biological_Process_2025	1
Testis_vs_ChoroidPlexus	Both_upregulated	Positive Regulation of Developmental Growth (GO:0048639)	'1/50	0.0392729	0.071459	0	0	27.1224	87.8013	PLCB1	GO_Biological_Process_2025	1
Testis_vs_ChoroidPlexus	Both_upregulated	Cardiac Muscle Tissue Development (GO:0048738)	'1/51	0.0400434	0.0723172	0	0	26.5787	85.5246	NRG1	GO_Biological_Process_2025	1
Testis_vs_ChoroidPlexus	Both_upregulated	Cellular Response to Ionizing Radiation (GO:0071479)	'1/53	0.0415827	0.0739927	0	0	25.5538	81.263	PRPF38B	GO_Biological_Process_2025	1
Testis_vs_ChoroidPlexus	Both_upregulated	Positive Regulation of Small GTPase Mediated Signal Transduction (GO:0051057)	'1/53	0.0415827	0.0739927	0	0	25.5538	81.263	PRPF38B	GO_Biological_Process_2025	1
Testis_vs_ChoroidPlexus	Both_upregulated	Negative Regulation of DNA-templated Transcription (GO:0045892)	'3/1006	0.0435192	0.0768734	0	0	4.36713	13.689	NRG1;CHD3;PLCB1	GO_Biological_Process_2025	3
Testis_vs_ChoroidPlexus	Both_upregulated	Memory (GO:0007613)	'1/57	0.0446543	0.0777435	0	0	23.7238	73.7527	PLCB1	GO_Biological_Process_2025	1
Testis_vs_ChoroidPlexus	Both_upregulated	Cellular Response to Interleukin-1 (GO:0071347)	'1/57	0.0446543	0.0777435	0	0	23.7238	73.7527	PLCB1	GO_Biological_Process_2025	1
Testis_vs_ChoroidPlexus	Both_upregulated	ERBB Signaling Pathway (GO:0038127)	'1/58	0.0454208	0.0779562	0	0	23.3064	72.0585	NRG1	GO_Biological_Process_2025	1
Testis_vs_ChoroidPlexus	Both_upregulated	Regulation of Myoblast Differentiation (GO:0045661)	'1/58	0.0454208	0.0779562	0	0	23.3064	72.0585	PLCB1	GO_Biological_Process_2025	1
Testis_vs_ChoroidPlexus	Both_upregulated	Regulation of Embryonic Development (GO:0045995)	'1/59	0.0461867	0.0787125	0	0	22.9034	70.4296	PLCB1	GO_Biological_Process_2025	1
Testis_vs_ChoroidPlexus	Both_upregulated	Neuron Migration (GO:0001764)	'1/60	0.046952	0.0794572	0	0	22.5141	68.8624	MAP1B	GO_Biological_Process_2025	1
Testis_vs_ChoroidPlexus	Both_upregulated	Positive Regulation of Peptidyl-Tyrosine Phosphorylation (GO:0050731)	'1/63	0.0492444	0.082758	0	0	21.4215	64.4993	NRG1	GO_Biological_Process_2025	1
Testis_vs_ChoroidPlexus	Both_upregulated	Regulation of Synapse Assembly (GO:0051963)	'1/64	0.0500074	0.082889	0	0	21.0804	63.1482	SLIT3	GO_Biological_Process_2025	1
Testis_vs_ChoroidPlexus	Both_upregulated	Positive Regulation of Mitotic Cell Cycle Phase Transition (GO:1901992)	'1/64	0.0500074	0.082889	0	0	21.0804	63.1482	PLCB1	GO_Biological_Process_2025	1
Testis_vs_ChoroidPlexus	Both_upregulated	Glycerophospholipid Metabolic Process (GO:0006650)	'1/65	0.0507699	0.0835803	0	0	20.75	61.8444	PLCB1	GO_Biological_Process_2025	1
Testis_vs_ChoroidPlexus	Both_upregulated	Negative Regulation of Cytokine-Mediated Signaling Pathway (GO:0001960)	'1/67	0.052293	0.0855061	0	0	20.1192	59.3696	SLIT3	GO_Biological_Process_2025	1
Testis_vs_ChoroidPlexus	Both_upregulated	Phosphatidylinositol Metabolic Process (GO:0046488)	'1/69	0.0538139	0.0874024	0	0	19.5255	57.0579	PLCB1	GO_Biological_Process_2025	1
Testis_vs_ChoroidPlexus	Both_upregulated	Cellular Response to Reactive Oxygen Species (GO:0034614)	'1/71	0.0553324	0.0886785	0	0	18.9657	54.8943	PRPF38B	GO_Biological_Process_2025	1
Testis_vs_ChoroidPlexus	Both_upregulated	Response to Ionizing Radiation (GO:0010212)	'1/71	0.0553324	0.0886785	0	0	18.9657	54.8943	PRPF38B	GO_Biological_Process_2025	1
Testis_vs_ChoroidPlexus	Both_upregulated	Regulation of G Protein-Coupled Receptor Signaling Pathway (GO:0008277)	'1/72	0.0560908	0.0893025	0	0	18.6977	53.8639	PLCB1	GO_Biological_Process_2025	1
Testis_vs_ChoroidPlexus	Both_upregulated	Calcium Ion Transmembrane Import Into Cytosol (GO:0097553)	'1/74	0.057606	0.0911153	0	0	18.1836	51.8982	PLCB1	GO_Biological_Process_2025	1
Testis_vs_ChoroidPlexus	Both_upregulated	Gland Development (GO:0048732)	'1/75	0.0583627	0.09171	0	0	17.9369	50.9602	NRG1	GO_Biological_Process_2025	1
Testis_vs_ChoroidPlexus	Both_upregulated	Regulation of Rho Protein Signal Transduction (GO:0035023)	'1/76	0.0591188	0.09171	0	0	17.6969	50.0504	PRPF38B	GO_Biological_Process_2025	1
Testis_vs_ChoroidPlexus	Both_upregulated	Negative Regulation of Supramolecular Fiber Organization (GO:1902904)	'1/76	0.0591188	0.09171	0	0	17.6969	50.0504	LIMA1	GO_Biological_Process_2025	1
Testis_vs_ChoroidPlexus	Both_upregulated	Cholesterol Homeostasis (GO:0042632)	'1/80	0.0621377	0.0951227	0	0	16.7975	46.6701	LIMA1	GO_Biological_Process_2025	1
Testis_vs_ChoroidPlexus	Both_upregulated	Wound Healing (GO:0042060)	'1/81	0.062891	0.0951227	0	0	16.5867	45.8846	NRG1	GO_Biological_Process_2025	1
Testis_vs_ChoroidPlexus	Both_upregulated	Positive Regulation of JNK Cascade (GO:0046330)	'1/81	0.062891	0.0951227	0	0	16.5867	45.8846	PLCB1	GO_Biological_Process_2025	1
Testis_vs_ChoroidPlexus	Both_upregulated	Sterol Homeostasis (GO:0055092)	'1/81	0.062891	0.0951227	0	0	16.5867	45.8846	LIMA1	GO_Biological_Process_2025	1
Testis_vs_ChoroidPlexus	Both_upregulated	Regulation of Cilium Assembly (GO:1902017)	'1/83	0.0643959	0.0967939	0	0	16.1805	44.3783	LIMA1	GO_Biological_Process_2025	1
Testis_vs_ChoroidPlexus	Both_upregulated	Cell Morphogenesis Involved in Neuron Differentiation (GO:0048667)	'1/85	0.0658986	0.0984411	0	0	15.7937	42.953	MAP1B	GO_Biological_Process_2025	1
Testis_vs_ChoroidPlexus	Both_upregulated	Calcium Ion Transmembrane Transport (GO:0070588)	'1/87	0.0673989	0.100065	0	0	15.4248	41.6026	SLC24A3	GO_Biological_Process_2025	1
Testis_vs_ChoroidPlexus	Both_upregulated	Cellular Response to Hormone Stimulus (GO:0032870)	'1/89	0.0688971	0.101665	0	0	15.0727	40.3217	SLIT3	GO_Biological_Process_2025	1
Testis_vs_ChoroidPlexus	Both_upregulated	RNA Splicing (GO:0008380)	'1/92	0.07114	0.102333	0	0	14.5736	38.5196	SNRPN	GO_Biological_Process_2025	1
Testis_vs_ChoroidPlexus	Both_upregulated	Positive Regulation of Response to Stimulus (GO:0048584)	'1/92	0.07114	0.102333	0	0	14.5736	38.5196	EYA2	GO_Biological_Process_2025	1
Testis_vs_ChoroidPlexus	Both_upregulated	Positive Regulation of Cell Adhesion (GO:0045785)	'1/92	0.07114	0.102333	0	0	14.5736	38.5196	NRG1	GO_Biological_Process_2025	1
Testis_vs_ChoroidPlexus	Both_upregulated	Positive Regulation of RNA Biosynthetic Process (GO:1902680)	'2/555	0.0713757	0.102333	0	0	5.01963	13.2508	CHD3;PLCB1	GO_Biological_Process_2025	2
Testis_vs_ChoroidPlexus	Both_upregulated	Positive Regulation of DNA Repair (GO:0045739)	'1/93	0.0718865	0.102333	0	0	14.4145	37.9486	EYA2	GO_Biological_Process_2025	1
Testis_vs_ChoroidPlexus	Both_upregulated	Positive Regulation of Cellular Component Biogenesis (GO:0044089)	'1/93	0.0718865	0.102333	0	0	14.4145	37.9486	NRG1	GO_Biological_Process_2025	1
Testis_vs_ChoroidPlexus	Both_upregulated	Positive Regulation of Hydrolase Activity (GO:0051345)	'1/98	0.0756107	0.107005	0	0	13.668	35.293	PRPF38B	GO_Biological_Process_2025	1
Testis_vs_ChoroidPlexus	Both_upregulated	Monoatomic Ion Transport (GO:0006811)	'1/100	0.0770964	0.108473	0	0	13.3906	34.316	SLC24A3	GO_Biological_Process_2025	1
Testis_vs_ChoroidPlexus	Both_upregulated	Calcium Ion Homeostasis (GO:0055074)	'1/105	0.080801	0.111736	0	0	12.7436	32.0599	SLC24A3	GO_Biological_Process_2025	1
Testis_vs_ChoroidPlexus	Both_upregulated	Organic Anion Transport (GO:0015711)	'1/105	0.080801	0.111736	0	0	12.7436	32.0599	SLC4A4	GO_Biological_Process_2025	1
Testis_vs_ChoroidPlexus	Both_upregulated	Positive Regulation of Protein-Containing Complex Assembly (GO:0031334)	'1/105	0.080801	0.111736	0	0	12.7436	32.0599	NRG1	GO_Biological_Process_2025	1
Testis_vs_ChoroidPlexus	Both_upregulated	Positive Regulation of Cell Growth (GO:0030307)	'1/107	0.0822789	0.112494	0	0	12.5019	31.2252	NRG1	GO_Biological_Process_2025	1
Testis_vs_ChoroidPlexus	Both_upregulated	Axon Development (GO:0061564)	'1/107	0.0822789	0.112494	0	0	12.5019	31.2252	MAP1B	GO_Biological_Process_2025	1
Testis_vs_ChoroidPlexus	Both_upregulated	Positive Regulation of DNA Metabolic Process (GO:0051054)	'1/108	0.083017	0.112866	0	0	12.3844	30.8212	EYA2	GO_Biological_Process_2025	1
Testis_vs_ChoroidPlexus	Both_upregulated	Positive Regulation of GTPase Activity (GO:0043547)	'1/111	0.0852281	0.113951	0	0	12.0448	29.6595	PRPF38B	GO_Biological_Process_2025	1
Testis_vs_ChoroidPlexus	Both_upregulated	Regulation of G1/S Transition of Mitotic Cell Cycle (GO:2000045)	'1/111	0.0852281	0.113951	0	0	12.0448	29.6595	PLCB1	GO_Biological_Process_2025	1
Testis_vs_ChoroidPlexus	Both_upregulated	Positive Regulation of Cellular Component Organization (GO:0051130)	'1/111	0.0852281	0.113951	0	0	12.0448	29.6595	NRG1	GO_Biological_Process_2025	1
Testis_vs_ChoroidPlexus	Both_upregulated	Mitotic Cell Cycle Phase Transition (GO:0044772)	'1/113	0.0866993	0.115282	0	0	11.8286	28.9245	PLCB1	GO_Biological_Process_2025	1
Testis_vs_ChoroidPlexus	Both_upregulated	Negative Regulation of Growth (GO:0045926)	'1/115	0.0881684	0.115961	0	0	11.6199	28.219	SLIT3	GO_Biological_Process_2025	1
Testis_vs_ChoroidPlexus	Both_upregulated	Regulation of JNK Cascade (GO:0046328)	'1/115	0.0881684	0.115961	0	0	11.6199	28.219	PLCB1	GO_Biological_Process_2025	1
Testis_vs_ChoroidPlexus	Both_upregulated	Enzyme-Linked Receptor Protein Signaling Pathway (GO:0007167)	'1/121	0.0925622	0.12043	0	0	11.0356	26.2632	NRG1	GO_Biological_Process_2025	1
Testis_vs_ChoroidPlexus	Both_upregulated	Negative Regulation of Cell Growth (GO:0030308)	'1/121	0.0925622	0.12043	0	0	11.0356	26.2632	SLIT3	GO_Biological_Process_2025	1
Testis_vs_ChoroidPlexus	Both_upregulated	Calcium Ion Transport (GO:0006816)	'1/126	0.0962085	0.123843	0	0	10.5915	24.7971	SLC24A3	GO_Biological_Process_2025	1
Testis_vs_ChoroidPlexus	Both_upregulated	Regulation of Protein-Containing Complex Assembly (GO:0043254)	'1/126	0.0962085	0.123843	0	0	10.5915	24.7971	NRG1	GO_Biological_Process_2025	1
Testis_vs_ChoroidPlexus	Both_upregulated	Potassium Ion Transport (GO:0006813)	'1/127	0.0969361	0.124119	0	0	10.5069	24.5199	SLC24A3	GO_Biological_Process_2025	1
Testis_vs_ChoroidPlexus	Both_upregulated	Regulation of DNA Repair (GO:0006282)	'1/130	0.0991157	0.126242	0	0	10.261	23.7179	EYA2	GO_Biological_Process_2025	1
Testis_vs_ChoroidPlexus	Both_upregulated	Neuron Projection Guidance (GO:0097485)	'1/132	0.100566	0.127419	0	0	10.1033	23.2067	SLIT3	GO_Biological_Process_2025	1
Testis_vs_ChoroidPlexus	Both_upregulated	Regulation of GTPase Activity (GO:0043087)	'1/134	0.102014	0.127914	0	0	9.95038	22.7132	PRPF38B	GO_Biological_Process_2025	1
Testis_vs_ChoroidPlexus	Both_upregulated	Potassium Ion Transmembrane Transport (GO:0071805)	'1/134	0.102014	0.127914	0	0	9.95038	22.7132	SLC24A3	GO_Biological_Process_2025	1
Testis_vs_ChoroidPlexus	Both_upregulated	Intracellular Calcium Ion Homeostasis (GO:0006874)	'1/140	0.106345	0.132658	0	0	9.51799	21.3304	SLC24A3	GO_Biological_Process_2025	1
Testis_vs_ChoroidPlexus	Both_upregulated	Regulation of Cell Adhesion (GO:0030155)	'1/142	0.107785	0.133764	0	0	9.38203	20.8996	NRG1	GO_Biological_Process_2025	1
Testis_vs_ChoroidPlexus	Both_upregulated	Axon Guidance (GO:0007411)	'1/152	0.114949	0.141927	0	0	8.75629	18.9422	SLIT3	GO_Biological_Process_2025	1
Testis_vs_ChoroidPlexus	Both_upregulated	Positive Regulation of ERK1 and ERK2 Cascade (GO:0070374)	'1/153	0.115662	0.142083	0	0	8.69825	18.7628	NRG1	GO_Biological_Process_2025	1
Testis_vs_ChoroidPlexus	Both_upregulated	Regulation of Small GTPase Mediated Signal Transduction (GO:0051056)	'1/157	0.118511	0.144119	0	0	8.4735	18.0719	PRPF38B	GO_Biological_Process_2025	1
Testis_vs_ChoroidPlexus	Both_upregulated	Neuron Projection Morphogenesis (GO:0048812)	'1/157	0.118511	0.144119	0	0	8.4735	18.0719	MAP1B	GO_Biological_Process_2025	1
Testis_vs_ChoroidPlexus	Both_upregulated	Neuron Development (GO:0048666)	'1/159	0.119932	0.144396	0	0	8.3654	17.7416	MAP1B	GO_Biological_Process_2025	1
Testis_vs_ChoroidPlexus	Both_upregulated	Regulation of Cellular Component Organization (GO:0051128)	'1/159	0.119932	0.144396	0	0	8.3654	17.7416	PRPF38B	GO_Biological_Process_2025	1
Testis_vs_ChoroidPlexus	Both_upregulated	Brain Development (GO:0007420)	'1/170	0.127709	0.152998	0	0	7.81657	16.0865	NRG1	GO_Biological_Process_2025	1
Testis_vs_ChoroidPlexus	Both_upregulated	RNA Splicing, via Transesterification Reactions With Bulged Adenosine as Nucleophile (GO:0000377)	'1/171	0.128413	0.153083	0	0	7.7702	15.9484	SNRPN	GO_Biological_Process_2025	1
Testis_vs_ChoroidPlexus	Both_upregulated	Metal Ion Transport (GO:0030001)	'1/180	0.134723	0.159819	0	0	7.37616	14.7858	SLC4A4	GO_Biological_Process_2025	1
Testis_vs_ChoroidPlexus	Both_upregulated	Generation of Neurons (GO:0048699)	'1/192	0.143071	0.168893	0	0	6.90855	13.4331	MAP1B	GO_Biological_Process_2025	1
Testis_vs_ChoroidPlexus	Both_upregulated	Regulation of Cell Differentiation (GO:0045595)	'1/201	0.149281	0.175326	0	0	6.59467	12.5425	CHD3	GO_Biological_Process_2025	1
Testis_vs_ChoroidPlexus	Both_upregulated	Negative Regulation of Macromolecule Biosynthetic Process (GO:0010558)	'1/202	0.149969	0.175326	0	0	6.56153	12.4494	SLC24A3	GO_Biological_Process_2025	1
Testis_vs_ChoroidPlexus	Both_upregulated	Neuron Projection Development (GO:0031175)	'1/206	0.152714	0.177677	0	0	6.4322	12.0873	MAP1B	GO_Biological_Process_2025	1
Testis_vs_ChoroidPlexus	Both_upregulated	Intracellular Monoatomic Cation Homeostasis (GO:0030003)	'1/210	0.15545	0.179072	0	0	6.30781	11.7416	SLC24A3	GO_Biological_Process_2025	1
Testis_vs_ChoroidPlexus	Both_upregulated	Regulation of Signal Transduction (GO:0009966)	'1/211	0.156133	0.179072	0	0	6.27746	11.6575	PLCB1	GO_Biological_Process_2025	1
Testis_vs_ChoroidPlexus	Both_upregulated	mRNA Splicing, via Spliceosome (GO:0000398)	'1/211	0.156133	0.179072	0	0	6.27746	11.6575	SNRPN	GO_Biological_Process_2025	1
Testis_vs_ChoroidPlexus	Both_upregulated	Regulation of ERK1 and ERK2 Cascade (GO:0070372)	'1/223	0.164286	0.187534	0	0	5.93453	10.7186	NRG1	GO_Biological_Process_2025	1
Testis_vs_ChoroidPlexus	Both_upregulated	mRNA Processing (GO:0006397)	'1/226	0.166313	0.188957	0	0	5.85452	10.5023	SNRPN	GO_Biological_Process_2025	1
Testis_vs_ChoroidPlexus	Both_upregulated	Positive Regulation of Developmental Process (GO:0051094)	'1/245	0.179043	0.202469	0	0	5.39344	9.27742	PLCB1	GO_Biological_Process_2025	1
Testis_vs_ChoroidPlexus	Both_upregulated	Positive Regulation of Programmed Cell Death (GO:0043068)	'1/248	0.181036	0.203771	0	0	5.32713	9.10437	PRPF38B	GO_Biological_Process_2025	1
Testis_vs_ChoroidPlexus	Both_upregulated	Cytokine-Mediated Signaling Pathway (GO:0019221)	'1/255	0.185669	0.208018	0	0	5.17848	8.71946	PLCB1	GO_Biological_Process_2025	1
Testis_vs_ChoroidPlexus	Both_upregulated	Chromatin Remodeling (GO:0006338)	'1/262	0.190278	0.212199	0	0	5.0378	8.35907	CHD3	GO_Biological_Process_2025	1
Testis_vs_ChoroidPlexus	Both_upregulated	Cellular Component Assembly (GO:0022607)	'1/277	0.200071	0.222097	0	0	4.76039	7.65985	LIMA1	GO_Biological_Process_2025	1
Testis_vs_ChoroidPlexus	Both_upregulated	Central Nervous System Development (GO:0007417)	'1/288	0.207182	0.228941	0	0	4.57538	7.20236	NRG1	GO_Biological_Process_2025	1
Testis_vs_ChoroidPlexus	Both_upregulated	RNA Processing (GO:0006396)	'1/291	0.209112	0.230023	0	0	4.52736	7.0848	SNRPN	GO_Biological_Process_2025	1
Testis_vs_ChoroidPlexus	Both_upregulated	Positive Regulation of Cell Differentiation (GO:0045597)	'1/297	0.212957	0.233192	0	0	4.43423	6.85828	PLCB1	GO_Biological_Process_2025	1
Testis_vs_ChoroidPlexus	Both_upregulated	Regulation of Intracellular Signal Transduction (GO:1902531)	'1/302	0.216147	0.23562	0	0	4.35947	6.67781	PRPF38B	GO_Biological_Process_2025	1
Testis_vs_ChoroidPlexus	Both_upregulated	Positive Regulation of Apoptotic Process (GO:0043065)	'1/313	0.223124	0.242135	0	0	4.20342	6.30524	PRPF38B	GO_Biological_Process_2025	1
Testis_vs_ChoroidPlexus	Both_upregulated	Regulation of Gene Expression (GO:0010468)	'2/1127	0.226905	0.245139	0	0	2.39479	3.55201	SLC24A3;CHD3	GO_Biological_Process_2025	2
Testis_vs_ChoroidPlexus	Both_upregulated	Protein-Containing Complex Assembly (GO:0065003)	'1/323	0.229417	0.245658	0	0	4.07081	5.99311	NRG1	GO_Biological_Process_2025	1
Testis_vs_ChoroidPlexus	Both_upregulated	Chromatin Organization (GO:0006325)	'1/323	0.229417	0.245658	0	0	4.07081	5.99311	CHD3	GO_Biological_Process_2025	1
Testis_vs_ChoroidPlexus	Both_upregulated	Positive Regulation of Cytokine Production (GO:0001819)	'1/325	0.230669	0.245912	0	0	4.04527	5.93348	PLCB1	GO_Biological_Process_2025	1
Testis_vs_ChoroidPlexus	Both_upregulated	Regulation of DNA-templated Transcription (GO:0006355)	'3/2139	0.240914	0.255707	0	0	1.92826	2.74453	NRG1;CHD3;PLCB1	GO_Biological_Process_2025	3
Testis_vs_ChoroidPlexus	Both_upregulated	Positive Regulation of Macromolecule Biosynthetic Process (GO:0010557)	'1/355	0.249232	0.263381	0	0	3.6968	5.13623	SLC24A3	GO_Biological_Process_2025	1
Testis_vs_ChoroidPlexus	Both_upregulated	Negative Regulation of Gene Expression (GO:0010629)	'1/364	0.254718	0.268008	0	0	3.60349	4.92812	SLC24A3	GO_Biological_Process_2025	1
Testis_vs_ChoroidPlexus	Both_upregulated	Positive Regulation of DNA-templated Transcription (GO:0045893)	'2/1274	0.271403	0.284327	0	0	2.10153	2.74071	CHD3;PLCB1	GO_Biological_Process_2025	2
Testis_vs_ChoroidPlexus	Both_upregulated	Positive Regulation of Multicellular Organismal Process (GO:0051240)	'1/407	0.280416	0.292503	0	0	3.21478	4.08752	PLCB1	GO_Biological_Process_2025	1
Testis_vs_ChoroidPlexus	Both_upregulated	Positive Regulation of Gene Expression (GO:0010628)	'1/436	0.297276	0.308759	0	0	2.99602	3.63445	SLC24A3	GO_Biological_Process_2025	1
Testis_vs_ChoroidPlexus	Both_upregulated	Regulation of RNA Biosynthetic Process (GO:2001141)	'1/465	0.313765	0.324492	0	0	2.8046	3.25084	CHD3	GO_Biological_Process_2025	1
Testis_vs_ChoroidPlexus	Both_upregulated	Nervous System Development (GO:0007399)	'1/480	0.32215	0.331746	0	0	2.71468	3.07502	NRG1	GO_Biological_Process_2025	1
Testis_vs_ChoroidPlexus	Both_upregulated	Positive Regulation of Cell Population Proliferation (GO:0008284)	'1/484	0.32437	0.332617	0	0	2.69165	3.03045	NRG1	GO_Biological_Process_2025	1
Testis_vs_ChoroidPlexus	Both_upregulated	Negative Regulation of Cellular Process (GO:0048523)	'1/531	0.349949	0.357332	0	0	2.44704	2.56932	SLIT3	GO_Biological_Process_2025	1
Testis_vs_ChoroidPlexus	Both_upregulated	Positive Regulation of Cellular Process (GO:0048522)	'1/622	0.396913	0.403584	0	0	2.07869	1.92079	NRG1	GO_Biological_Process_2025	1
Testis_vs_ChoroidPlexus	Both_upregulated	Regulation of Apoptotic Process (GO:0042981)	'1/704	0.436489	0.441968	0	0	1.82845	1.51577	PRPF38B	GO_Biological_Process_2025	1
Testis_vs_ChoroidPlexus	Both_upregulated	Negative Regulation of Transcription by RNA Polymerase II (GO:0000122)	'1/732	0.449436	0.453181	0	0	1.75586	1.40427	CHD3	GO_Biological_Process_2025	1
Testis_vs_ChoroidPlexus	Both_upregulated	Regulation of Cell Population Proliferation (GO:0042127)	'1/769	0.466117	0.468051	0	0	1.66806	1.27326	NRG1	GO_Biological_Process_2025	1
Testis_vs_ChoroidPlexus	Both_upregulated	Regulation of Transcription by RNA Polymerase II (GO:0006357)	'1/2250	0.851964	0.851964	0	0	0.525715	0.0842252	CHD3	GO_Biological_Process_2025	1
Testis_vs_ChoroidPlexus	Upregulated_in_COVID19_downregulated_in_Influenza	Regulation of Response to Nutrient Levels (GO:0032107)	'1/6	0.00149922	0.014891	0	0	999.5	6499.56	PRKAG2	GO_Biological_Process_2025	1
Testis_vs_ChoroidPlexus	Upregulated_in_COVID19_downregulated_in_Influenza	Regulation of Resting Membrane Potential (GO:0060075)	'1/7	0.00174892	0.014891	0	0	832.875	5287.72	NALCN	GO_Biological_Process_2025	1
Testis_vs_ChoroidPlexus	Upregulated_in_COVID19_downregulated_in_Influenza	Nucleic Acid Transport (GO:0050657)	'1/8	0.00199856	0.014891	0	0	713.857	4436.86	RBFOX1	GO_Biological_Process_2025	1
Testis_vs_ChoroidPlexus	Upregulated_in_COVID19_downregulated_in_Influenza	Positive Regulation of Synaptic Transmission, GABAergic (GO:0032230)	'1/8	0.00199856	0.014891	0	0	713.857	4436.86	NALCN	GO_Biological_Process_2025	1
Testis_vs_ChoroidPlexus	Upregulated_in_COVID19_downregulated_in_Influenza	Positive Regulation of Gluconeogenesis (GO:0045722)	'1/10	0.00249771	0.014891	0	0	555.167	3326.77	PRKAG2	GO_Biological_Process_2025	1
Testis_vs_ChoroidPlexus	Upregulated_in_COVID19_downregulated_in_Influenza	Glucan Metabolic Process (GO:0044042)	'1/10	0.00249771	0.014891	0	0	555.167	3326.77	PRKAG2	GO_Biological_Process_2025	1
Testis_vs_ChoroidPlexus	Upregulated_in_COVID19_downregulated_in_Influenza	Purine Ribonucleoside Triphosphate Biosynthetic Process (GO:0009206)	'1/11	0.00274721	0.014891	0	0	499.625	2946.37	PRKAG2	GO_Biological_Process_2025	1
Testis_vs_ChoroidPlexus	Upregulated_in_COVID19_downregulated_in_Influenza	Regulation of Purine Nucleotide Catabolic Process (GO:0033121)	'1/11	0.00274721	0.014891	0	0	499.625	2946.37	PRKAG2	GO_Biological_Process_2025	1
Testis_vs_ChoroidPlexus	Upregulated_in_COVID19_downregulated_in_Influenza	Regulation of Ketone Metabolic Process (GO:0010565)	'1/12	0.00299665	0.014891	0	0	454.182	2638.91	PRKAG2	GO_Biological_Process_2025	1
Testis_vs_ChoroidPlexus	Upregulated_in_COVID19_downregulated_in_Influenza	Regulation of Carbohydrate Catabolic Process (GO:0043470)	'1/13	0.00324605	0.014891	0	0	416.312	2385.6	PRKAG2	GO_Biological_Process_2025	1
Testis_vs_ChoroidPlexus	Upregulated_in_COVID19_downregulated_in_Influenza	Regulation of ATP Metabolic Process (GO:1903578)	'1/15	0.0037447	0.014891	0	0	356.804	1993.61	PRKAG2	GO_Biological_Process_2025	1
Testis_vs_ChoroidPlexus	Upregulated_in_COVID19_downregulated_in_Influenza	Regulation of Fatty Acid Oxidation (GO:0046320)	'1/15	0.0037447	0.014891	0	0	356.804	1993.61	PRKAG2	GO_Biological_Process_2025	1
Testis_vs_ChoroidPlexus	Upregulated_in_COVID19_downregulated_in_Influenza	Regulation of D-glucose Transmembrane Transport (GO:0010827)	'1/17	0.00424314	0.014891	0	0	312.172	1705.22	PRKAG2	GO_Biological_Process_2025	1
Testis_vs_ChoroidPlexus	Upregulated_in_COVID19_downregulated_in_Influenza	Positive Regulation of Glucose Metabolic Process (GO:0010907)	'1/18	0.00449229	0.014891	0	0	293.794	1588.07	PRKAG2	GO_Biological_Process_2025	1
Testis_vs_ChoroidPlexus	Upregulated_in_COVID19_downregulated_in_Influenza	Energy Reserve Metabolic Process (GO:0006112)	'1/20	0.00499044	0.014891	0	0	262.842	1393.12	PRKAG2	GO_Biological_Process_2025	1
Testis_vs_ChoroidPlexus	Upregulated_in_COVID19_downregulated_in_Influenza	Regulation of Synaptic Transmission, GABAergic (GO:0032228)	'1/20	0.00499044	0.014891	0	0	262.842	1393.12	NALCN	GO_Biological_Process_2025	1
Testis_vs_ChoroidPlexus	Upregulated_in_COVID19_downregulated_in_Influenza	Glycogen Metabolic Process (GO:0005977)	'1/20	0.00499044	0.014891	0	0	262.842	1393.12	PRKAG2	GO_Biological_Process_2025	1
Testis_vs_ChoroidPlexus	Upregulated_in_COVID19_downregulated_in_Influenza	Regulation of Fatty Acid Metabolic Process (GO:0019217)	'1/20	0.00499044	0.014891	0	0	262.842	1393.12	PRKAG2	GO_Biological_Process_2025	1
Testis_vs_ChoroidPlexus	Upregulated_in_COVID19_downregulated_in_Influenza	Regulation of Generation of Precursor Metabolites and Energy (GO:0043467)	'1/21	0.00523944	0.014891	0	0	249.688	1311.24	PRKAG2	GO_Biological_Process_2025	1
Testis_vs_ChoroidPlexus	Upregulated_in_COVID19_downregulated_in_Influenza	ATP Biosynthetic Process (GO:0006754)	'1/24	0.00598614	0.0160327	0	0	217.087	1111.12	PRKAG2	GO_Biological_Process_2025	1
Testis_vs_ChoroidPlexus	Upregulated_in_COVID19_downregulated_in_Influenza	Steroid Biosynthetic Process (GO:0006694)	'1/25	0.00623494	0.0160327	0	0	208.031	1056.3	PRKAG2	GO_Biological_Process_2025	1
Testis_vs_ChoroidPlexus	Upregulated_in_COVID19_downregulated_in_Influenza	Sterol Biosynthetic Process (GO:0016126)	'1/28	0.00698104	0.0171353	0	0	184.889	917.891	PRKAG2	GO_Biological_Process_2025	1
Testis_vs_ChoroidPlexus	Upregulated_in_COVID19_downregulated_in_Influenza	Regulation of Small Molecule Metabolic Process (GO:0062012)	'1/33	0.00822355	0.0190618	0	0	155.961	748.73	PRKAG2	GO_Biological_Process_2025	1
Testis_vs_ChoroidPlexus	Upregulated_in_COVID19_downregulated_in_Influenza	Regulation of Gluconeogenesis (GO:0006111)	'1/34	0.0084719	0.0190618	0	0	151.227	721.505	PRKAG2	GO_Biological_Process_2025	1
Testis_vs_ChoroidPlexus	Upregulated_in_COVID19_downregulated_in_Influenza	Regulation of D-glucose Import (GO:0046324)	'1/36	0.00896846	0.0193719	0	0	142.571	672.088	PRKAG2	GO_Biological_Process_2025	1
Testis_vs_ChoroidPlexus	Upregulated_in_COVID19_downregulated_in_Influenza	Negative Regulation of Kinase Activity (GO:0033673)	'1/41	0.010209	0.0199331	0	0	124.719	571.772	PRKAG2	GO_Biological_Process_2025	1
Testis_vs_ChoroidPlexus	Upregulated_in_COVID19_downregulated_in_Influenza	Regulation of Glycolytic Process (GO:0006110)	'1/42	0.0104569	0.0199331	0	0	121.671	554.878	PRKAG2	GO_Biological_Process_2025	1
Testis_vs_ChoroidPlexus	Upregulated_in_COVID19_downregulated_in_Influenza	Cellular Response to Glucose Starvation (GO:0042149)	'1/43	0.0107048	0.0199331	0	0	118.768	538.857	PRKAG2	GO_Biological_Process_2025	1
Testis_vs_ChoroidPlexus	Upregulated_in_COVID19_downregulated_in_Influenza	RNA Transport (GO:0050658)	'1/43	0.0107048	0.0199331	0	0	118.768	538.857	RBFOX1	GO_Biological_Process_2025	1
Testis_vs_ChoroidPlexus	Upregulated_in_COVID19_downregulated_in_Influenza	Purine Ribonucleotide Biosynthetic Process (GO:0009152)	'1/45	0.0112005	0.0201609	0	0	113.358	509.181	PRKAG2	GO_Biological_Process_2025	1
Testis_vs_ChoroidPlexus	Upregulated_in_COVID19_downregulated_in_Influenza	Regulation of Lipid Metabolic Process (GO:0019216)	'1/51	0.0126863	0.0220987	0	0	99.725	435.522	PRKAG2	GO_Biological_Process_2025	1
Testis_vs_ChoroidPlexus	Upregulated_in_COVID19_downregulated_in_Influenza	Regulation of Alternative mRNA Splicing, via Spliceosome (GO:0000381)	'1/55	0.0136758	0.0230779	0	0	92.3194	396.247	RBFOX1	GO_Biological_Process_2025	1
Testis_vs_ChoroidPlexus	Upregulated_in_COVID19_downregulated_in_Influenza	Sterol Metabolic Process (GO:0016125)	'1/58	0.0144175	0.0235922	0	0	87.4474	370.717	PRKAG2	GO_Biological_Process_2025	1
Testis_vs_ChoroidPlexus	Upregulated_in_COVID19_downregulated_in_Influenza	Negative Regulation of Protein Kinase Activity (GO:0006469)	'1/60	0.0149116	0.0236832	0	0	84.4746	355.267	PRKAG2	GO_Biological_Process_2025	1
Testis_vs_ChoroidPlexus	Upregulated_in_COVID19_downregulated_in_Influenza	ATP Metabolic Process (GO:0046034)	'1/62	0.0154056	0.0237686	0	0	81.6967	340.922	PRKAG2	GO_Biological_Process_2025	1
Testis_vs_ChoroidPlexus	Upregulated_in_COVID19_downregulated_in_Influenza	Negative Regulation of Protein Phosphorylation (GO:0001933)	'1/83	0.0205804	0.0284008	0	0	60.7104	235.764	PRKAG2	GO_Biological_Process_2025	1
Testis_vs_ChoroidPlexus	Upregulated_in_COVID19_downregulated_in_Influenza	Regulation of Protein Kinase Activity (GO:0045859)	'1/83	0.0205804	0.0284008	0	0	60.7104	235.764	PRKAG2	GO_Biological_Process_2025	1
Testis_vs_ChoroidPlexus	Upregulated_in_COVID19_downregulated_in_Influenza	Positive Regulation of Synaptic Transmission (GO:0050806)	'1/84	0.0208263	0.0284008	0	0	59.9759	232.199	NALCN	GO_Biological_Process_2025	1
Testis_vs_ChoroidPlexus	Upregulated_in_COVID19_downregulated_in_Influenza	Calcium Ion Transmembrane Transport (GO:0070588)	'1/87	0.0215636	0.0284008	0	0	57.875	222.052	NALCN	GO_Biological_Process_2025	1
Testis_vs_ChoroidPlexus	Upregulated_in_COVID19_downregulated_in_Influenza	Sodium Ion Transmembrane Transport (GO:0035725)	'1/87	0.0215636	0.0284008	0	0	57.875	222.052	NALCN	GO_Biological_Process_2025	1
Testis_vs_ChoroidPlexus	Upregulated_in_COVID19_downregulated_in_Influenza	Positive Regulation of Biosynthetic Process (GO:0009891)	'1/87	0.0215636	0.0284008	0	0	57.875	222.052	PRKAG2	GO_Biological_Process_2025	1
Testis_vs_ChoroidPlexus	Upregulated_in_COVID19_downregulated_in_Influenza	Sodium Ion Transport (GO:0006814)	'1/96	0.0237729	0.0301623	0	0	52.3684	195.816	NALCN	GO_Biological_Process_2025	1
Testis_vs_ChoroidPlexus	Upregulated_in_COVID19_downregulated_in_Influenza	Regulation of mRNA Splicing, via Spliceosome (GO:0048024)	'1/97	0.0240181	0.0301623	0	0	51.8203	193.235	RBFOX1	GO_Biological_Process_2025	1
Testis_vs_ChoroidPlexus	Upregulated_in_COVID19_downregulated_in_Influenza	Calcium Ion Transport (GO:0006816)	'1/126	0.0311085	0.0376227	0	0	39.74	137.909	NALCN	GO_Biological_Process_2025	1
Testis_vs_ChoroidPlexus	Upregulated_in_COVID19_downregulated_in_Influenza	Potassium Ion Transport (GO:0006813)	'1/127	0.0313522	0.0376227	0	0	39.4226	136.5	NALCN	GO_Biological_Process_2025	1
Testis_vs_ChoroidPlexus	Upregulated_in_COVID19_downregulated_in_Influenza	Potassium Ion Transmembrane Transport (GO:0071805)	'1/134	0.0330572	0.0385397	0	0	37.3346	127.293	NALCN	GO_Biological_Process_2025	1
Testis_vs_ChoroidPlexus	Upregulated_in_COVID19_downregulated_in_Influenza	Receptor-Mediated Endocytosis (GO:0006898)	'1/136	0.0335438	0.0385397	0	0	36.7778	124.857	LRP1B	GO_Biological_Process_2025	1
Testis_vs_ChoroidPlexus	Upregulated_in_COVID19_downregulated_in_Influenza	Cellular Response to Starvation (GO:0009267)	'1/141	0.0347597	0.0391047	0	0	35.4554	119.105	PRKAG2	GO_Biological_Process_2025	1
Testis_vs_ChoroidPlexus	Upregulated_in_COVID19_downregulated_in_Influenza	Nitrogen Compound Transport (GO:0071705)	'1/172	0.0422707	0.046584	0	0	28.9825	91.6907	LRP1B	GO_Biological_Process_2025	1
Testis_vs_ChoroidPlexus	Upregulated_in_COVID19_downregulated_in_Influenza	Monoatomic Cation Transmembrane Transport (GO:0098655)	'1/304	0.0737313	0.0775436	0	0	16.2475	42.3626	NALCN	GO_Biological_Process_2025	1
Testis_vs_ChoroidPlexus	Upregulated_in_COVID19_downregulated_in_Influenza	Inorganic Cation Transmembrane Transport (GO:0098662)	'1/307	0.0744366	0.0775436	0	0	16.0858	41.7878	NALCN	GO_Biological_Process_2025	1
Testis_vs_ChoroidPlexus	Upregulated_in_COVID19_downregulated_in_Influenza	Protein Transport (GO:0015031)	'1/308	0.0746716	0.0775436	0	0	16.0326	41.599	LRP1B	GO_Biological_Process_2025	1
Testis_vs_ChoroidPlexus	Upregulated_in_COVID19_downregulated_in_Influenza	Regulation of Cell Cycle (GO:0051726)	'1/318	0.077019	0.0784721	0	0	15.5189	39.7859	PRKAG2	GO_Biological_Process_2025	1
Testis_vs_ChoroidPlexus	Upregulated_in_COVID19_downregulated_in_Influenza	Nervous System Development (GO:0007399)	'1/480	0.114387	0.114387	0	0	10.1858	22.0845	RBFOX1	GO_Biological_Process_2025	1
Testis_vs_Parenchyma	All_genes	Sensory Perception of Mechanical Stimulus (GO:0050954)	'3/92	0.00242056	0.164358	0	0	12.1673	73.2929	GRM7;PCDH15;LHFPL3	GO_Biological_Process_2025	3
Testis_vs_Parenchyma	All_genes	Sensory Perception of Sound (GO:0007605)	'3/96	0.00273158	0.164358	0	0	11.6416	68.7192	GRM7;PCDH15;LHFPL3	GO_Biological_Process_2025	3
Testis_vs_Parenchyma	All_genes	Long-Term Synaptic Potentiation (GO:0060291)	'2/28	0.00297647	0.164358	0	0	27.3571	159.137	CALM3;VAMP2	GO_Biological_Process_2025	2
Testis_vs_Parenchyma	All_genes	Natural Killer Cell Mediated Cytotoxicity (GO:0042267)	'2/32	0.00387671	0.164358	0	0	23.7048	131.627	TUBB4B;VAMP2	GO_Biological_Process_2025	2
Testis_vs_Parenchyma	All_genes	Negative Regulation of G Protein-Coupled Receptor Signaling Pathway (GO:0045744)	'2/39	0.00571686	0.164358	0	0	19.2133	99.224	YWHAB;STMN1	GO_Biological_Process_2025	2
Testis_vs_Parenchyma	All_genes	Regulation of Release of Sequestered Calcium Ion Into Cytosol (GO:0051279)	'2/53	0.0103592	0.164358	0	0	13.9293	63.6551	UBASH3B;CALM3	GO_Biological_Process_2025	2
Testis_vs_Parenchyma	All_genes	Cell Surface Receptor Protein Tyrosine Kinase Signaling Pathway (GO:0007169)	'4/296	0.0106629	0.164358	0	0	4.98478	22.6358	PTPRT;ALK;UBASH3B;STMN1	GO_Biological_Process_2025	4
Testis_vs_Parenchyma	All_genes	Neuron Development (GO:0048666)	'3/159	0.0110529	0.164358	0	0	6.91818	31.1669	PTPRT;ALK;STMN1	GO_Biological_Process_2025	3
Testis_vs_Parenchyma	All_genes	Negative Regulation of Protein-Containing Complex Assembly (GO:0031333)	'2/59	0.0127207	0.164358	0	0	12.4593	54.3788	AIDA;SVIP	GO_Biological_Process_2025	2
Testis_vs_Parenchyma	All_genes	Equilibrioception (GO:0050957)	'1/5	0.0144175	0.164358	0	0	87.4474	370.717	PCDH15	GO_Biological_Process_2025	1
Testis_vs_Parenchyma	All_genes	Negative Regulation of Organic Acid Transport (GO:0032891)	'1/5	0.0144175	0.164358	0	0	87.4474	370.717	GRM7	GO_Biological_Process_2025	1
Testis_vs_Parenchyma	All_genes	Natural Killer Cell Degranulation (GO:0043320)	'1/5	0.0144175	0.164358	0	0	87.4474	370.717	VAMP2	GO_Biological_Process_2025	1
Testis_vs_Parenchyma	All_genes	Neutrophil Degranulation (GO:0043312)	'1/5	0.0144175	0.164358	0	0	87.4474	370.717	VAMP2	GO_Biological_Process_2025	1
Testis_vs_Parenchyma	All_genes	Behavioral Fear Response (GO:0001662)	'1/5	0.0144175	0.164358	0	0	87.4474	370.717	GRM7	GO_Biological_Process_2025	1
Testis_vs_Parenchyma	All_genes	Regulation of Synapse Assembly (GO:0051963)	'2/64	0.0148505	0.164358	0	0	11.4516	48.2081	CUX2;LHFPL3	GO_Biological_Process_2025	2
Testis_vs_Parenchyma	All_genes	Cellular Response to Caffeine (GO:0071313)	'1/6	0.0172763	0.164358	0	0	69.9544	283.904	RYR1	GO_Biological_Process_2025	1
Testis_vs_Parenchyma	All_genes	Regulation of High Voltage-Gated Calcium Channel Activity (GO:1901841)	'1/6	0.0172763	0.164358	0	0	69.9544	283.904	CALM3	GO_Biological_Process_2025	1
Testis_vs_Parenchyma	All_genes	Regulation of Histamine Secretion by Mast Cell (GO:1903593)	'1/6	0.0172763	0.164358	0	0	69.9544	283.904	VAMP2	GO_Biological_Process_2025	1
Testis_vs_Parenchyma	All_genes	Release of Sequestered Calcium Ion Into Cytosol by Sarcoplasmic Reticulum (GO:0014808)	'1/6	0.0172763	0.164358	0	0	69.9544	283.904	RYR1	GO_Biological_Process_2025	1
Testis_vs_Parenchyma	All_genes	Response to Alkaloid (GO:0043279)	'1/6	0.0172763	0.164358	0	0	69.9544	283.904	RYR1	GO_Biological_Process_2025	1
Testis_vs_Parenchyma	All_genes	Response to Caffeine (GO:0031000)	'1/6	0.0172763	0.164358	0	0	69.9544	283.904	RYR1	GO_Biological_Process_2025	1
Testis_vs_Parenchyma	All_genes	Hepatocyte Growth Factor Receptor Signaling Pathway (GO:0048012)	'1/6	0.0172763	0.164358	0	0	69.9544	283.904	STMN1	GO_Biological_Process_2025	1
Testis_vs_Parenchyma	All_genes	Negative Regulation of ERAD Pathway (GO:1904293)	'1/6	0.0172763	0.164358	0	0	69.9544	283.904	SVIP	GO_Biological_Process_2025	1
Testis_vs_Parenchyma	All_genes	Dendrite Arborization (GO:0140059)	'1/6	0.0172763	0.164358	0	0	69.9544	283.904	PHACTR1	GO_Biological_Process_2025	1
Testis_vs_Parenchyma	All_genes	Regulation of Protein Lipidation (GO:1903059)	'1/6	0.0172763	0.164358	0	0	69.9544	283.904	SVIP	GO_Biological_Process_2025	1
Testis_vs_Parenchyma	All_genes	Positive Regulation of Protein Transport (GO:0051222)	'2/73	0.0190401	0.164358	0	0	9.99547	39.5941	FRMD4A;VAMP2	GO_Biological_Process_2025	2
Testis_vs_Parenchyma	All_genes	Positive Regulation of Ryanodine-Sensitive Calcium-Release Channel Activity (GO:0060316)	'1/7	0.0201271	0.164358	0	0	58.2924	227.672	CALM3	GO_Biological_Process_2025	1
Testis_vs_Parenchyma	All_genes	Negative Regulation of Voltage-Gated Calcium Channel Activity (GO:1901386)	'1/7	0.0201271	0.164358	0	0	58.2924	227.672	CALM3	GO_Biological_Process_2025	1
Testis_vs_Parenchyma	All_genes	Neuron Projection Arborization (GO:0140058)	'1/7	0.0201271	0.164358	0	0	58.2924	227.672	PHACTR1	GO_Biological_Process_2025	1
Testis_vs_Parenchyma	All_genes	Neurotransmitter-Gated Ion Channel Clustering (GO:0072578)	'1/7	0.0201271	0.164358	0	0	58.2924	227.672	LHFPL3	GO_Biological_Process_2025	1
Testis_vs_Parenchyma	All_genes	Regulation of Neuron Differentiation (GO:0045664)	'2/76	0.0205348	0.164358	0	0	9.5888	37.2586	ALK;MMD2	GO_Biological_Process_2025	2
Testis_vs_Parenchyma	All_genes	Neuron Projection Development (GO:0031175)	'3/206	0.0219494	0.164358	0	0	5.30381	20.2553	PTPRT;GRM7;STMN1	GO_Biological_Process_2025	3
Testis_vs_Parenchyma	All_genes	Negative Regulation of Cellular Component Organization (GO:0051129)	'2/80	0.0226014	0.164358	0	0	9.09524	34.4686	AIDA;SVIP	GO_Biological_Process_2025	2
Testis_vs_Parenchyma	All_genes	Pyrimidine Nucleotide-Sugar Transmembrane Transport (GO:0090481)	'1/8	0.0229697	0.164358	0	0	49.9624	188.537	TMEM241	GO_Biological_Process_2025	1
Testis_vs_Parenchyma	All_genes	Release of Sequestered Calcium Ion Into Cytosol by Endoplasmic Reticulum (GO:1903514)	'1/8	0.0229697	0.164358	0	0	49.9624	188.537	RYR1	GO_Biological_Process_2025	1
Testis_vs_Parenchyma	All_genes	Cellular Response to Purine-Containing Compound (GO:0071415)	'1/8	0.0229697	0.164358	0	0	49.9624	188.537	RYR1	GO_Biological_Process_2025	1
Testis_vs_Parenchyma	All_genes	Negative Regulation of Retrograde Protein Transport, ER to Cytosol (GO:1904153)	'1/8	0.0229697	0.164358	0	0	49.9624	188.537	SVIP	GO_Biological_Process_2025	1
Testis_vs_Parenchyma	All_genes	Negative Regulation of Ryanodine-Sensitive Calcium-Release Channel Activity (GO:0060315)	'1/8	0.0229697	0.164358	0	0	49.9624	188.537	CALM3	GO_Biological_Process_2025	1
Testis_vs_Parenchyma	All_genes	Collagen-Activated Signaling Pathway (GO:0038065)	'1/8	0.0229697	0.164358	0	0	49.9624	188.537	UBASH3B	GO_Biological_Process_2025	1
Testis_vs_Parenchyma	All_genes	Amino Sugar Metabolic Process (GO:0006040)	'1/8	0.0229697	0.164358	0	0	49.9624	188.537	ST6GAL1	GO_Biological_Process_2025	1
Testis_vs_Parenchyma	All_genes	Regulation of Myeloid Leukocyte Differentiation (GO:0002761)	'1/8	0.0229697	0.164358	0	0	49.9624	188.537	UBASH3B	GO_Biological_Process_2025	1
Testis_vs_Parenchyma	All_genes	Macromolecule Modification (GO:0043412)	'2/84	0.0247504	0.164358	0	0	8.64983	31.995	ST6GAL1;UBA52	GO_Biological_Process_2025	2
Testis_vs_Parenchyma	All_genes	Positive Regulation of Synaptic Transmission (GO:0050806)	'2/84	0.0247504	0.164358	0	0	8.64983	31.995	CALM3;VAMP2	GO_Biological_Process_2025	2
Testis_vs_Parenchyma	All_genes	Regulation of Delayed Rectifier Potassium Channel Activity (GO:1902259)	'1/9	0.0258042	0.164358	0	0	43.7149	159.875	VAMP2	GO_Biological_Process_2025	1
Testis_vs_Parenchyma	All_genes	SNARE Complex Assembly (GO:0035493)	'1/9	0.0258042	0.164358	0	0	43.7149	159.875	VAMP2	GO_Biological_Process_2025	1
Testis_vs_Parenchyma	All_genes	Modification-Dependent Macromolecule Catabolic Process (GO:0043632)	'1/9	0.0258042	0.164358	0	0	43.7149	159.875	UBA52	GO_Biological_Process_2025	1
Testis_vs_Parenchyma	All_genes	Negative Regulation of Protein Exit From Endoplasmic Reticulum (GO:0070862)	'1/9	0.0258042	0.164358	0	0	43.7149	159.875	SVIP	GO_Biological_Process_2025	1
Testis_vs_Parenchyma	All_genes	Negative Regulation of Release of Sequestered Calcium Ion Into Cytosol (GO:0051280)	'1/9	0.0258042	0.164358	0	0	43.7149	159.875	CALM3	GO_Biological_Process_2025	1
Testis_vs_Parenchyma	All_genes	Sialylation (GO:0097503)	'1/9	0.0258042	0.164358	0	0	43.7149	159.875	ST6GAL1	GO_Biological_Process_2025	1
Testis_vs_Parenchyma	All_genes	Negative Regulation of Bone Resorption (GO:0045779)	'1/9	0.0258042	0.164358	0	0	43.7149	159.875	UBASH3B	GO_Biological_Process_2025	1
Testis_vs_Parenchyma	All_genes	N-acetylneuraminate Metabolic Process (GO:0006054)	'1/10	0.0286306	0.164358	0	0	38.8558	138.065	ST6GAL1	GO_Biological_Process_2025	1
Testis_vs_Parenchyma	All_genes	Negative Regulation of Protein Import Into Nucleus (GO:0042308)	'1/10	0.0286306	0.164358	0	0	38.8558	138.065	YWHAB	GO_Biological_Process_2025	1
Testis_vs_Parenchyma	All_genes	Sarcoplasmic Reticulum Calcium Ion Transport (GO:0070296)	'1/10	0.0286306	0.164358	0	0	38.8558	138.065	RYR1	GO_Biological_Process_2025	1
Testis_vs_Parenchyma	All_genes	Positive Regulation of Cell Morphogenesis (GO:0010770)	'1/10	0.0286306	0.164358	0	0	38.8558	138.065	CUX2	GO_Biological_Process_2025	1
Testis_vs_Parenchyma	All_genes	Positive Regulation of Dendritic Spine Morphogenesis (GO:0061003)	'1/10	0.0286306	0.164358	0	0	38.8558	138.065	CUX2	GO_Biological_Process_2025	1
Testis_vs_Parenchyma	All_genes	Response to Calcium Ion (GO:0051592)	'2/95	0.0310675	0.164358	0	0	7.6225	26.4622	RYR1;CALM3	GO_Biological_Process_2025	2
Testis_vs_Parenchyma	All_genes	Regulation of Sequestering of Calcium Ion (GO:0051282)	'1/11	0.031449	0.164358	0	0	34.9684	120.969	UBASH3B	GO_Biological_Process_2025	1
Testis_vs_Parenchyma	All_genes	Skeletal Muscle Fiber Development (GO:0048741)	'1/11	0.031449	0.164358	0	0	34.9684	120.969	RYR1	GO_Biological_Process_2025	1
Testis_vs_Parenchyma	All_genes	Negative Regulation of Bone Remodeling (GO:0046851)	'1/11	0.031449	0.164358	0	0	34.9684	120.969	UBASH3B	GO_Biological_Process_2025	1
Testis_vs_Parenchyma	All_genes	Regulation of Cell Communication by Electrical Coupling Involved in Cardiac Conduction (GO:1901844)	'1/11	0.031449	0.164358	0	0	34.9684	120.969	CALM3	GO_Biological_Process_2025	1
Testis_vs_Parenchyma	All_genes	Neutrophil Activation Involved in Immune Response (GO:0002283)	'1/11	0.031449	0.164358	0	0	34.9684	120.969	VAMP2	GO_Biological_Process_2025	1
Testis_vs_Parenchyma	All_genes	Positive Regulation of Neuron Projection Development (GO:0010976)	'2/99	0.0335068	0.164358	0	0	7.3067	24.8136	ALK;CUX2	GO_Biological_Process_2025	2
Testis_vs_Parenchyma	All_genes	Regulation of Retrograde Protein Transport, ER to Cytosol (GO:1904152)	'1/12	0.0342593	0.164358	0	0	31.7879	107.246	SVIP	GO_Biological_Process_2025	1
Testis_vs_Parenchyma	All_genes	Regulation of Short-Term Neuronal Synaptic Plasticity (GO:0048172)	'1/12	0.0342593	0.164358	0	0	31.7879	107.246	SHISA9	GO_Biological_Process_2025	1
Testis_vs_Parenchyma	All_genes	Peptidyl-Tyrosine Autophosphorylation (GO:0038083)	'1/12	0.0342593	0.164358	0	0	31.7879	107.246	ALK	GO_Biological_Process_2025	1
Testis_vs_Parenchyma	All_genes	Negative Regulation of Microtubule Polymerization (GO:0031115)	'1/12	0.0342593	0.164358	0	0	31.7879	107.246	STMN1	GO_Biological_Process_2025	1
Testis_vs_Parenchyma	All_genes	Detection of Calcium Ion (GO:0005513)	'1/12	0.0342593	0.164358	0	0	31.7879	107.246	CALM3	GO_Biological_Process_2025	1
Testis_vs_Parenchyma	All_genes	Positive Regulation of Ras Protein Signal Transduction (GO:0046579)	'1/13	0.0370617	0.164358	0	0	29.1374	96.0128	MMD2	GO_Biological_Process_2025	1
Testis_vs_Parenchyma	All_genes	Negative Regulation of Bone Mineralization (GO:0030502)	'1/13	0.0370617	0.164358	0	0	29.1374	96.0128	RFLNA	GO_Biological_Process_2025	1
Testis_vs_Parenchyma	All_genes	Regulation of Cell Communication by Electrical Coupling (GO:0010649)	'1/13	0.0370617	0.164358	0	0	29.1374	96.0128	CALM3	GO_Biological_Process_2025	1
Testis_vs_Parenchyma	All_genes	Calcium-Ion Regulated Exocytosis (GO:0017156)	'1/14	0.039856	0.164358	0	0	26.8947	86.6678	VAMP2	GO_Biological_Process_2025	1
Testis_vs_Parenchyma	All_genes	G Protein-Coupled Glutamate Receptor Signaling Pathway (GO:0007216)	'1/14	0.039856	0.164358	0	0	26.8947	86.6678	GRM7	GO_Biological_Process_2025	1
Testis_vs_Parenchyma	All_genes	Response to Interleukin-6 (GO:0070741)	'1/14	0.039856	0.164358	0	0	26.8947	86.6678	PTPRT	GO_Biological_Process_2025	1
Testis_vs_Parenchyma	All_genes	Myotube Cell Development (GO:0014904)	'1/14	0.039856	0.164358	0	0	26.8947	86.6678	RYR1	GO_Biological_Process_2025	1
Testis_vs_Parenchyma	All_genes	Neuron Cell-Cell Adhesion (GO:0007158)	'1/14	0.039856	0.164358	0	0	26.8947	86.6678	NCAM2	GO_Biological_Process_2025	1
Testis_vs_Parenchyma	All_genes	Regulation of Potassium Ion Transmembrane Transporter Activity (GO:1901016)	'1/14	0.039856	0.164358	0	0	26.8947	86.6678	VAMP2	GO_Biological_Process_2025	1
Testis_vs_Parenchyma	All_genes	Neutrophil Mediated Immunity (GO:0002446)	'1/14	0.039856	0.164358	0	0	26.8947	86.6678	VAMP2	GO_Biological_Process_2025	1
Testis_vs_Parenchyma	All_genes	Negative Regulation of Chondrocyte Differentiation (GO:0032331)	'1/15	0.0426424	0.164358	0	0	24.9724	78.7857	RFLNA	GO_Biological_Process_2025	1
Testis_vs_Parenchyma	All_genes	Arp2/3 Complex-Mediated Actin Nucleation (GO:0034314)	'1/15	0.0426424	0.164358	0	0	24.9724	78.7857	ARPC5	GO_Biological_Process_2025	1
Testis_vs_Parenchyma	All_genes	Regulation of Hormone Secretion (GO:0046883)	'1/15	0.0426424	0.164358	0	0	24.9724	78.7857	VAMP2	GO_Biological_Process_2025	1
Testis_vs_Parenchyma	All_genes	Neuromuscular Process Controlling Balance (GO:0050885)	'1/15	0.0426424	0.164358	0	0	24.9724	78.7857	PCDH15	GO_Biological_Process_2025	1
Testis_vs_Parenchyma	All_genes	Modulation of Chemical Synaptic Transmission (GO:0050804)	'2/117	0.0453546	0.164358	0	0	6.15745	19.0465	GRM7;DLGAP4	GO_Biological_Process_2025	2
Testis_vs_Parenchyma	All_genes	Regulation of Ryanodine-Sensitive Calcium-Release Channel Activity (GO:0060314)	'1/16	0.0454208	0.164358	0	0	23.3064	72.0585	CALM3	GO_Biological_Process_2025	1
Testis_vs_Parenchyma	All_genes	Cellular Response to Alkaloid (GO:0071312)	'1/16	0.0454208	0.164358	0	0	23.3064	72.0585	RYR1	GO_Biological_Process_2025	1
Testis_vs_Parenchyma	All_genes	Microtubule Depolymerization (GO:0007019)	'1/16	0.0454208	0.164358	0	0	23.3064	72.0585	STMN1	GO_Biological_Process_2025	1
Testis_vs_Parenchyma	All_genes	Postsynaptic Membrane Organization (GO:0001941)	'1/16	0.0454208	0.164358	0	0	23.3064	72.0585	LHFPL3	GO_Biological_Process_2025	1
Testis_vs_Parenchyma	All_genes	Negative Regulation of Signal Transduction (GO:0009968)	'3/277	0.0464375	0.164358	0	0	3.91533	12.0187	PTPRT;UBASH3B;YWHAB	GO_Biological_Process_2025	3
Testis_vs_Parenchyma	All_genes	Enzyme-Linked Receptor Protein Signaling Pathway (GO:0007167)	'2/121	0.0481698	0.164358	0	0	5.94928	18.0443	PTPRT;ALK	GO_Biological_Process_2025	2
Testis_vs_Parenchyma	All_genes	Calcineurin-Mediated Signaling (GO:0097720)	'1/17	0.0481913	0.164358	0	0	21.8487	66.2578	CALM3	GO_Biological_Process_2025	1
Testis_vs_Parenchyma	All_genes	Negative Regulation of Intracellular Protein Transport (GO:0090317)	'1/17	0.0481913	0.164358	0	0	21.8487	66.2578	YWHAB	GO_Biological_Process_2025	1
Testis_vs_Parenchyma	All_genes	Negative Regulation of Receptor Signaling Pathway via STAT (GO:1904893)	'1/17	0.0481913	0.164358	0	0	21.8487	66.2578	PTPRT	GO_Biological_Process_2025	1
Testis_vs_Parenchyma	All_genes	Contractile Actin Filament Bundle Assembly (GO:0030038)	'1/17	0.0481913	0.164358	0	0	21.8487	66.2578	PHACTR1	GO_Biological_Process_2025	1
Testis_vs_Parenchyma	All_genes	Reg of Cardiac Muscle Contraction by Reg of the Release of Sequestered Calcium Ion (GO:0010881)	'1/17	0.0481913	0.164358	0	0	21.8487	66.2578	CALM3	GO_Biological_Process_2025	1
Testis_vs_Parenchyma	All_genes	Positive Regulation of Dendrite Morphogenesis (GO:0050775)	'1/17	0.0481913	0.164358	0	0	21.8487	66.2578	CUX2	GO_Biological_Process_2025	1
Testis_vs_Parenchyma	All_genes	Stress Fiber Assembly (GO:0043149)	'1/17	0.0481913	0.164358	0	0	21.8487	66.2578	PHACTR1	GO_Biological_Process_2025	1
Testis_vs_Parenchyma	All_genes	Negative Regulation of Nucleocytoplasmic Transport (GO:0046823)	'1/18	0.0509538	0.167323	0	0	20.5624	61.211	YWHAB	GO_Biological_Process_2025	1
Testis_vs_Parenchyma	All_genes	Positive Regulation of Calcium Ion Transmembrane Transporter Activity (GO:1901021)	'1/18	0.0509538	0.167323	0	0	20.5624	61.211	CALM3	GO_Biological_Process_2025	1
Testis_vs_Parenchyma	All_genes	Regulation of Protein-Containing Complex Assembly (GO:0043254)	'2/126	0.0517764	0.167323	0	0	5.70795	16.9002	AIDA;SVIP	GO_Biological_Process_2025	2
Testis_vs_Parenchyma	All_genes	Negative Regulation of MAPK Cascade (GO:0043409)	'2/127	0.0525091	0.167323	0	0	5.662	16.6846	PEBP1;AIDA	GO_Biological_Process_2025	2
Testis_vs_Parenchyma	All_genes	Regulation of Receptor Signaling Pathway via STAT (GO:1904892)	'1/19	0.0537086	0.167323	0	0	19.4191	56.785	PTPRT	GO_Biological_Process_2025	1
Testis_vs_Parenchyma	All_genes	Negative Regulation of Lipid Catabolic Process (GO:0050995)	'1/19	0.0537086	0.167323	0	0	19.4191	56.785	ALK	GO_Biological_Process_2025	1
Testis_vs_Parenchyma	All_genes	Actin Nucleation (GO:0045010)	'1/19	0.0537086	0.167323	0	0	19.4191	56.785	ARPC5	GO_Biological_Process_2025	1
Testis_vs_Parenchyma	All_genes	Negative Regulation of Rho Protein Signal Transduction (GO:0035024)	'1/19	0.0537086	0.167323	0	0	19.4191	56.785	STMN1	GO_Biological_Process_2025	1
Testis_vs_Parenchyma	All_genes	Negative Regulation of Calcium Ion Transmembrane Transporter Activity (GO:1901020)	'1/19	0.0537086	0.167323	0	0	19.4191	56.785	CALM3	GO_Biological_Process_2025	1
Testis_vs_Parenchyma	All_genes	Regulation of Cell Cycle G2/M Phase Transition (GO:1902749)	'1/20	0.0564554	0.172562	0	0	18.3961	52.8761	KCNH5	GO_Biological_Process_2025	1
Testis_vs_Parenchyma	All_genes	Presynaptic Endocytosis (GO:0140238)	'1/20	0.0564554	0.172562	0	0	18.3961	52.8761	VAMP2	GO_Biological_Process_2025	1
Testis_vs_Parenchyma	All_genes	Establishment of Skin Barrier (GO:0061436)	'1/21	0.0591944	0.176019	0	0	17.4754	49.4018	STMN1	GO_Biological_Process_2025	1
Testis_vs_Parenchyma	All_genes	Negative Regulation of Cation Channel Activity (GO:2001258)	'1/21	0.0591944	0.176019	0	0	17.4754	49.4018	CALM3	GO_Biological_Process_2025	1
Testis_vs_Parenchyma	All_genes	Peptidyl-Tyrosine Dephosphorylation (GO:0035335)	'1/22	0.0619256	0.176019	0	0	16.6424	46.2963	PTPRT	GO_Biological_Process_2025	1
Testis_vs_Parenchyma	All_genes	Natural Killer Cell Activation Involved in Immune Response (GO:0002323)	'1/22	0.0619256	0.176019	0	0	16.6424	46.2963	VAMP2	GO_Biological_Process_2025	1
Testis_vs_Parenchyma	All_genes	Regulation of Cardiac Muscle Contraction by Calcium Ion Signaling (GO:0010882)	'1/22	0.0619256	0.176019	0	0	16.6424	46.2963	CALM3	GO_Biological_Process_2025	1
Testis_vs_Parenchyma	All_genes	Negative Regulation of Cell Communication (GO:0010648)	'1/22	0.0619256	0.176019	0	0	16.6424	46.2963	UBASH3B	GO_Biological_Process_2025	1
Testis_vs_Parenchyma	All_genes	Negative Regulation of Cell Development (GO:0010721)	'1/22	0.0619256	0.176019	0	0	16.6424	46.2963	RFLNA	GO_Biological_Process_2025	1
Testis_vs_Parenchyma	All_genes	Plasma Membrane Bounded Cell Projection Organization (GO:0120036)	'2/141	0.0631469	0.176019	0	0	5.08813	14.0549	PTPRT;STMN1	GO_Biological_Process_2025	2
Testis_vs_Parenchyma	All_genes	Cellular Response to Interleukin-6 (GO:0071354)	'1/23	0.064649	0.176019	0	0	15.8852	43.506	PTPRT	GO_Biological_Process_2025	1
Testis_vs_Parenchyma	All_genes	Regulation of ERAD Pathway (GO:1904292)	'1/23	0.064649	0.176019	0	0	15.8852	43.506	SVIP	GO_Biological_Process_2025	1
Testis_vs_Parenchyma	All_genes	Skin Epidermis Development (GO:0098773)	'1/23	0.064649	0.176019	0	0	15.8852	43.506	STMN1	GO_Biological_Process_2025	1
Testis_vs_Parenchyma	All_genes	Positive Regulation of Dendritic Spine Development (GO:0060999)	'1/23	0.064649	0.176019	0	0	15.8852	43.506	CUX2	GO_Biological_Process_2025	1
Testis_vs_Parenchyma	All_genes	Positive Regulation of Excitatory Postsynaptic Potential (GO:2000463)	'1/23	0.064649	0.176019	0	0	15.8852	43.506	CUX2	GO_Biological_Process_2025	1
Testis_vs_Parenchyma	All_genes	Regulation of Release of Sequestered Calcium Ion Into Cytosol by Sarcoplasmic Reticulum (GO:0010880)	'1/24	0.0673647	0.180381	0	0	15.1937	40.9872	CALM3	GO_Biological_Process_2025	1
Testis_vs_Parenchyma	All_genes	Negative Regulation of Stress Fiber Assembly (GO:0051497)	'1/24	0.0673647	0.180381	0	0	15.1937	40.9872	STMN1	GO_Biological_Process_2025	1
Testis_vs_Parenchyma	All_genes	Cardiac Muscle Cell Development (GO:0055013)	'1/25	0.0700725	0.183093	0	0	14.5599	38.7036	SORBS2	GO_Biological_Process_2025	1
Testis_vs_Parenchyma	All_genes	Response to Hexose (GO:0009746)	'1/25	0.0700725	0.183093	0	0	14.5599	38.7036	VAMP2	GO_Biological_Process_2025	1
Testis_vs_Parenchyma	All_genes	Response to Purine-Containing Compound (GO:0014074)	'1/25	0.0700725	0.183093	0	0	14.5599	38.7036	RYR1	GO_Biological_Process_2025	1
Testis_vs_Parenchyma	All_genes	Protein Depolymerization (GO:0051261)	'1/26	0.0727727	0.183482	0	0	13.9768	36.6251	STMN1	GO_Biological_Process_2025	1
Testis_vs_Parenchyma	All_genes	Microtubule Polymerization or Depolymerization (GO:0031109)	'1/26	0.0727727	0.183482	0	0	13.9768	36.6251	STMN1	GO_Biological_Process_2025	1
Testis_vs_Parenchyma	All_genes	Regulation of Lipid Catabolic Process (GO:0050994)	'1/26	0.0727727	0.183482	0	0	13.9768	36.6251	ALK	GO_Biological_Process_2025	1
Testis_vs_Parenchyma	All_genes	Negative Regulation of Protein Localization to Nucleus (GO:1900181)	'1/26	0.0727727	0.183482	0	0	13.9768	36.6251	YWHAB	GO_Biological_Process_2025	1
Testis_vs_Parenchyma	All_genes	Regulation of Microtubule Polymerization or Depolymerization (GO:0031110)	'1/27	0.0754652	0.183482	0	0	13.4386	34.7265	STMN1	GO_Biological_Process_2025	1
Testis_vs_Parenchyma	All_genes	Negative Regulation of Actin Filament Bundle Assembly (GO:0032232)	'1/27	0.0754652	0.183482	0	0	13.4386	34.7265	STMN1	GO_Biological_Process_2025	1
Testis_vs_Parenchyma	All_genes	Regulation of Cation Channel Activity (GO:2001257)	'1/27	0.0754652	0.183482	0	0	13.4386	34.7265	VAMP2	GO_Biological_Process_2025	1
Testis_vs_Parenchyma	All_genes	Actin Filament Organization (GO:0007015)	'2/158	0.0769454	0.183482	0	0	4.52976	11.6173	MYO5C;RFLNA	GO_Biological_Process_2025	2
Testis_vs_Parenchyma	All_genes	Regulation of Striated Muscle Contraction (GO:0006942)	'1/28	0.0781499	0.183482	0	0	12.9402	32.9863	CALM3	GO_Biological_Process_2025	1
Testis_vs_Parenchyma	All_genes	Membrane Fusion (GO:0061025)	'1/28	0.0781499	0.183482	0	0	12.9402	32.9863	VAMP2	GO_Biological_Process_2025	1
Testis_vs_Parenchyma	All_genes	Negative Regulation of Protein Polymerization (GO:0032272)	'1/28	0.0781499	0.183482	0	0	12.9402	32.9863	STMN1	GO_Biological_Process_2025	1
Testis_vs_Parenchyma	All_genes	Negative Regulation of Signaling (GO:0023057)	'1/28	0.0781499	0.183482	0	0	12.9402	32.9863	UBASH3B	GO_Biological_Process_2025	1
Testis_vs_Parenchyma	All_genes	Regulation of Calcium Ion Transmembrane Transport (GO:1903169)	'1/28	0.0781499	0.183482	0	0	12.9402	32.9863	UBASH3B	GO_Biological_Process_2025	1
Testis_vs_Parenchyma	All_genes	Regulation of Cardiac Muscle Cell Action Potential (GO:0098901)	'1/28	0.0781499	0.183482	0	0	12.9402	32.9863	CALM3	GO_Biological_Process_2025	1
Testis_vs_Parenchyma	All_genes	Synaptic Vesicle Endocytosis (GO:0048488)	'1/29	0.080827	0.186102	0	0	12.4774	31.3863	VAMP2	GO_Biological_Process_2025	1
Testis_vs_Parenchyma	All_genes	Regulation of Dendrite Morphogenesis (GO:0048814)	'1/29	0.080827	0.186102	0	0	12.4774	31.3863	CUX2	GO_Biological_Process_2025	1
Testis_vs_Parenchyma	All_genes	Negative Regulation of Response to Endoplasmic Reticulum Stress (GO:1903573)	'1/30	0.0834965	0.186102	0	0	12.0466	29.9111	SVIP	GO_Biological_Process_2025	1
Testis_vs_Parenchyma	All_genes	Positive Regulation of Cation Channel Activity (GO:2001259)	'1/30	0.0834965	0.186102	0	0	12.0466	29.9111	CALM3	GO_Biological_Process_2025	1
Testis_vs_Parenchyma	All_genes	Regulation of Bone Resorption (GO:0045124)	'1/30	0.0834965	0.186102	0	0	12.0466	29.9111	UBASH3B	GO_Biological_Process_2025	1
Testis_vs_Parenchyma	All_genes	Dorsal/Ventral Pattern Formation (GO:0009953)	'1/30	0.0834965	0.186102	0	0	12.0466	29.9111	AIDA	GO_Biological_Process_2025	1
Testis_vs_Parenchyma	All_genes	Regulation of Dendritic Spine Morphogenesis (GO:0061001)	'1/31	0.0861583	0.186102	0	0	11.6444	28.5472	CUX2	GO_Biological_Process_2025	1
Testis_vs_Parenchyma	All_genes	Golgi to Plasma Membrane Protein Transport (GO:0043001)	'1/31	0.0861583	0.186102	0	0	11.6444	28.5472	VAMP2	GO_Biological_Process_2025	1
Testis_vs_Parenchyma	All_genes	Modulation of Excitatory Postsynaptic Potential (GO:0098815)	'1/31	0.0861583	0.186102	0	0	11.6444	28.5472	CUX2	GO_Biological_Process_2025	1
Testis_vs_Parenchyma	All_genes	Natural Killer Cell Mediated Immunity (GO:0002228)	'1/31	0.0861583	0.186102	0	0	11.6444	28.5472	TUBB4B	GO_Biological_Process_2025	1
Testis_vs_Parenchyma	All_genes	Regulation of Neuron Migration (GO:2001222)	'1/31	0.0861583	0.186102	0	0	11.6444	28.5472	PHACTR1	GO_Biological_Process_2025	1
Testis_vs_Parenchyma	All_genes	Negative Regulation of MAP Kinase Activity (GO:0043407)	'1/31	0.0861583	0.186102	0	0	11.6444	28.5472	AIDA	GO_Biological_Process_2025	1
Testis_vs_Parenchyma	All_genes	Negative Regulation of Lipid Metabolic Process (GO:0045833)	'1/33	0.0914593	0.192273	0	0	10.9156	26.1085	ALK	GO_Biological_Process_2025	1
Testis_vs_Parenchyma	All_genes	Signal Release From Synapse (GO:0099643)	'1/33	0.0914593	0.192273	0	0	10.9156	26.1085	VAMP2	GO_Biological_Process_2025	1
Testis_vs_Parenchyma	All_genes	Synaptic Vesicle Recycling (GO:0036465)	'1/34	0.0940984	0.192273	0	0	10.5843	25.015	VAMP2	GO_Biological_Process_2025	1
Testis_vs_Parenchyma	All_genes	Negative Regulation of Microtubule Polymerization or Depolymerization (GO:0031111)	'1/34	0.0940984	0.192273	0	0	10.5843	25.015	STMN1	GO_Biological_Process_2025	1
Testis_vs_Parenchyma	All_genes	Actin Filament Bundle Organization (GO:0061572)	'1/34	0.0940984	0.192273	0	0	10.5843	25.015	RFLNA	GO_Biological_Process_2025	1
Testis_vs_Parenchyma	All_genes	Regulation of Ras Protein Signal Transduction (GO:0046578)	'1/34	0.0940984	0.192273	0	0	10.5843	25.015	MMD2	GO_Biological_Process_2025	1
Testis_vs_Parenchyma	All_genes	Regulation of Cardiac Muscle Contraction (GO:0055117)	'1/34	0.0940984	0.192273	0	0	10.5843	25.015	CALM3	GO_Biological_Process_2025	1
Testis_vs_Parenchyma	All_genes	Metal Ion Transport (GO:0030001)	'2/180	0.0960534	0.192273	0	0	3.96549	9.29055	RYR1;KCNH5	GO_Biological_Process_2025	2
Testis_vs_Parenchyma	All_genes	Platelet Aggregation (GO:0070527)	'1/35	0.09673	0.192273	0	0	10.2724	23.9947	UBASH3B	GO_Biological_Process_2025	1
Testis_vs_Parenchyma	All_genes	Regulation of Neuronal Synaptic Plasticity (GO:0048168)	'1/35	0.09673	0.192273	0	0	10.2724	23.9947	SHISA9	GO_Biological_Process_2025	1
Testis_vs_Parenchyma	All_genes	Dendrite Morphogenesis (GO:0048813)	'1/35	0.09673	0.192273	0	0	10.2724	23.9947	PHACTR1	GO_Biological_Process_2025	1
Testis_vs_Parenchyma	All_genes	Positive Regulation of Synapse Assembly (GO:0051965)	'1/35	0.09673	0.192273	0	0	10.2724	23.9947	CUX2	GO_Biological_Process_2025	1
Testis_vs_Parenchyma	All_genes	Neurotransmitter Secretion (GO:0007269)	'1/35	0.09673	0.192273	0	0	10.2724	23.9947	VAMP2	GO_Biological_Process_2025	1
Testis_vs_Parenchyma	All_genes	Regulation of Cytosolic Calcium Ion Concentration (GO:0051480)	'1/36	0.099354	0.192759	0	0	9.97845	23.0409	RYR1	GO_Biological_Process_2025	1
Testis_vs_Parenchyma	All_genes	Carboxylic Acid Metabolic Process (GO:0019752)	'1/36	0.099354	0.192759	0	0	9.97845	23.0409	ST6GAL1	GO_Biological_Process_2025	1
Testis_vs_Parenchyma	All_genes	Glutamate Receptor Signaling Pathway (GO:0007215)	'1/36	0.099354	0.192759	0	0	9.97845	23.0409	GRM7	GO_Biological_Process_2025	1
Testis_vs_Parenchyma	All_genes	Positive Regulation of Release of Sequestered Calcium Ion Into Cytosol (GO:0051281)	'1/36	0.099354	0.192759	0	0	9.97845	23.0409	CALM3	GO_Biological_Process_2025	1
Testis_vs_Parenchyma	All_genes	Regulation of G2/M Transition of Mitotic Cell Cycle (GO:0010389)	'1/37	0.101971	0.195494	0	0	9.70078	22.1476	KCNH5	GO_Biological_Process_2025	1
Testis_vs_Parenchyma	All_genes	Protein N-linked Glycosylation via Asparagine (GO:0018279)	'1/37	0.101971	0.195494	0	0	9.70078	22.1476	ST6GAL1	GO_Biological_Process_2025	1
Testis_vs_Parenchyma	All_genes	O-glycan Processing (GO:0016266)	'1/38	0.10458	0.196999	0	0	9.43812	21.3094	ST6GAL1	GO_Biological_Process_2025	1
Testis_vs_Parenchyma	All_genes	Regulation of Intracellular Protein Transport (GO:0033157)	'1/38	0.10458	0.196999	0	0	9.43812	21.3094	VAMP2	GO_Biological_Process_2025	1
Testis_vs_Parenchyma	All_genes	Regulation of Microtubule Cytoskeleton Organization (GO:0070507)	'1/38	0.10458	0.196999	0	0	9.43812	21.3094	STMN1	GO_Biological_Process_2025	1
Testis_vs_Parenchyma	All_genes	Negative Regulation of Sequestering of Calcium Ion (GO:0051283)	'1/40	0.109776	0.205591	0	0	8.95322	19.7805	RYR1	GO_Biological_Process_2025	1
Testis_vs_Parenchyma	All_genes	Establishment of Protein Localization to Plasma Membrane (GO:0061951)	'1/41	0.112362	0.206849	0	0	8.72895	19.0817	VAMP2	GO_Biological_Process_2025	1
Testis_vs_Parenchyma	All_genes	Negative Regulation of Secretion by Cell (GO:1903531)	'1/41	0.112362	0.206849	0	0	8.72895	19.0817	GRM7	GO_Biological_Process_2025	1
Testis_vs_Parenchyma	All_genes	Regulation of Protein Import Into Nucleus (GO:0042306)	'1/41	0.112362	0.206849	0	0	8.72895	19.0817	YWHAB	GO_Biological_Process_2025	1
Testis_vs_Parenchyma	All_genes	Notch Signaling Pathway (GO:0007219)	'1/42	0.114942	0.208051	0	0	8.51562	18.4221	SORBS2	GO_Biological_Process_2025	1
Testis_vs_Parenchyma	All_genes	Positive Regulation of Neuron Differentiation (GO:0045666)	'1/42	0.114942	0.208051	0	0	8.51562	18.4221	MMD2	GO_Biological_Process_2025	1
Testis_vs_Parenchyma	All_genes	Skeletal Muscle Tissue Development (GO:0007519)	'1/42	0.114942	0.208051	0	0	8.51562	18.4221	RYR1	GO_Biological_Process_2025	1
Testis_vs_Parenchyma	All_genes	Synaptic Vesicle Exocytosis (GO:0016079)	'1/43	0.117514	0.208057	0	0	8.31245	17.7986	VAMP2	GO_Biological_Process_2025	1
Testis_vs_Parenchyma	All_genes	Regulation of Dendrite Development (GO:0050773)	'1/43	0.117514	0.208057	0	0	8.31245	17.7986	ALK	GO_Biological_Process_2025	1
Testis_vs_Parenchyma	All_genes	Release of Sequestered Calcium Ion Into Cytosol (GO:0051209)	'1/43	0.117514	0.208057	0	0	8.31245	17.7986	RYR1	GO_Biological_Process_2025	1
Testis_vs_Parenchyma	All_genes	Skeletal System Morphogenesis (GO:0048705)	'1/43	0.117514	0.208057	0	0	8.31245	17.7986	RFLNA	GO_Biological_Process_2025	1
Testis_vs_Parenchyma	All_genes	Regulated Exocytosis (GO:0045055)	'1/44	0.120079	0.2103	0	0	8.11873	17.2085	VAMP2	GO_Biological_Process_2025	1
Testis_vs_Parenchyma	All_genes	Substantia Nigra Development (GO:0021762)	'1/44	0.120079	0.2103	0	0	8.11873	17.2085	CALM3	GO_Biological_Process_2025	1
Testis_vs_Parenchyma	All_genes	Synaptic Vesicle Cycle (GO:0099504)	'1/45	0.122636	0.213475	0	0	7.93381	16.6494	VAMP2	GO_Biological_Process_2025	1
Testis_vs_Parenchyma	All_genes	Regulation of Transport (GO:0051049)	'1/46	0.125186	0.213475	0	0	7.75712	16.1189	VAMP2	GO_Biological_Process_2025	1
Testis_vs_Parenchyma	All_genes	Negative Regulation of Proteasomal Protein Catabolic Process (GO:1901799)	'1/46	0.125186	0.213475	0	0	7.75712	16.1189	SVIP	GO_Biological_Process_2025	1
Testis_vs_Parenchyma	All_genes	Homotypic Cell-Cell Adhesion (GO:0034109)	'1/46	0.125186	0.213475	0	0	7.75712	16.1189	UBASH3B	GO_Biological_Process_2025	1
Testis_vs_Parenchyma	All_genes	Regulation of Osteoclast Differentiation (GO:0045670)	'1/46	0.125186	0.213475	0	0	7.75712	16.1189	UBASH3B	GO_Biological_Process_2025	1
Testis_vs_Parenchyma	All_genes	Regulation of Trans-Synaptic Signaling (GO:0099177)	'1/47	0.127729	0.216671	0	0	7.5881	15.6151	DLGAP4	GO_Biological_Process_2025	1
Testis_vs_Parenchyma	All_genes	Positive Regulation of Kinase Activity (GO:0033674)	'1/48	0.130264	0.218682	0	0	7.42628	15.1362	MMD2	GO_Biological_Process_2025	1
Testis_vs_Parenchyma	All_genes	Regulation of Exocytosis (GO:0017157)	'1/48	0.130264	0.218682	0	0	7.42628	15.1362	VAMP2	GO_Biological_Process_2025	1
Testis_vs_Parenchyma	All_genes	Positive Regulation of Intracellular Transport (GO:0032388)	'1/49	0.132793	0.22064	0	0	7.2712	14.6803	VAMP2	GO_Biological_Process_2025	1
Testis_vs_Parenchyma	All_genes	Negative Regulation of Small GTPase Mediated Signal Transduction (GO:0051058)	'1/49	0.132793	0.22064	0	0	7.2712	14.6803	STMN1	GO_Biological_Process_2025	1
Testis_vs_Parenchyma	All_genes	Cognition (GO:0050890)	'1/50	0.135314	0.223682	0	0	7.12245	14.246	CUX2	GO_Biological_Process_2025	1
Testis_vs_Parenchyma	All_genes	Regulation of Secretion by Cell (GO:1903530)	'1/51	0.137828	0.224403	0	0	6.97965	13.8319	VAMP2	GO_Biological_Process_2025	1
Testis_vs_Parenchyma	All_genes	Positive Regulation of Nervous System Development (GO:0051962)	'1/51	0.137828	0.224403	0	0	6.97965	13.8319	CUX2	GO_Biological_Process_2025	1
Testis_vs_Parenchyma	All_genes	Response to Glucose (GO:0009749)	'1/51	0.137828	0.224403	0	0	6.97965	13.8319	VAMP2	GO_Biological_Process_2025	1
Testis_vs_Parenchyma	All_genes	Regulation of Synaptic Transmission, Glutamatergic (GO:0051966)	'1/52	0.140334	0.226211	0	0	6.84245	13.4367	GRM7	GO_Biological_Process_2025	1
Testis_vs_Parenchyma	All_genes	Sensory Perception (GO:0007600)	'1/52	0.140334	0.226211	0	0	6.84245	13.4367	PCDH15	GO_Biological_Process_2025	1
Testis_vs_Parenchyma	All_genes	Regulation of Microtubule Polymerization (GO:0031113)	'1/53	0.142834	0.227971	0	0	6.71053	13.0592	STMN1	GO_Biological_Process_2025	1
Testis_vs_Parenchyma	All_genes	Positive Regulation of Small GTPase Mediated Signal Transduction (GO:0051057)	'1/53	0.142834	0.227971	0	0	6.71053	13.0592	MMD2	GO_Biological_Process_2025	1
Testis_vs_Parenchyma	All_genes	Golgi to Plasma Membrane Transport (GO:0006893)	'1/55	0.147812	0.233614	0	0	6.46134	12.3529	VAMP2	GO_Biological_Process_2025	1
Testis_vs_Parenchyma	All_genes	Striated Muscle Contraction (GO:0006941)	'1/55	0.147812	0.233614	0	0	6.46134	12.3529	RYR1	GO_Biological_Process_2025	1
Testis_vs_Parenchyma	All_genes	Adenylate Cyclase-Inhibiting G Protein-Coupled Receptor Signaling Pathway (GO:0007193)	'1/56	0.15029	0.236378	0	0	6.34354	12.0222	GRM7	GO_Biological_Process_2025	1
Testis_vs_Parenchyma	All_genes	Memory (GO:0007613)	'1/57	0.152761	0.237954	0	0	6.22995	11.7053	CUX2	GO_Biological_Process_2025	1
Testis_vs_Parenchyma	All_genes	Negative Regulation of Response to Stimulus (GO:0048585)	'1/57	0.152761	0.237954	0	0	6.22995	11.7053	UBASH3B	GO_Biological_Process_2025	1
Testis_vs_Parenchyma	All_genes	Peptidyl-Tyrosine Phosphorylation (GO:0018108)	'1/58	0.155225	0.239854	0	0	6.12034	11.4015	ALK	GO_Biological_Process_2025	1
Testis_vs_Parenchyma	All_genes	Protein Homotetramerization (GO:0051289)	'1/59	0.157682	0.239854	0	0	6.01452	11.1099	RYR1	GO_Biological_Process_2025	1
Testis_vs_Parenchyma	All_genes	Cellular Response to Calcium Ion (GO:0071277)	'1/59	0.157682	0.239854	0	0	6.01452	11.1099	RYR1	GO_Biological_Process_2025	1
Testis_vs_Parenchyma	All_genes	Microtubule Cytoskeleton Organization Involved in Mitosis (GO:1902850)	'1/59	0.157682	0.239854	0	0	6.01452	11.1099	STMN1	GO_Biological_Process_2025	1
Testis_vs_Parenchyma	All_genes	Homophilic Cell Adhesion via Plasma Membrane Adhesion Molecules (GO:0007156)	'1/59	0.157682	0.239854	0	0	6.01452	11.1099	PTPRT	GO_Biological_Process_2025	1
Testis_vs_Parenchyma	All_genes	Negative Regulation of Protein Kinase Activity (GO:0006469)	'1/60	0.160132	0.242442	0	0	5.91228	10.8299	PTPRT	GO_Biological_Process_2025	1
Testis_vs_Parenchyma	All_genes	Mitotic Cytokinesis (GO:0000281)	'1/62	0.165011	0.248667	0	0	5.71786	10.3021	STMN1	GO_Biological_Process_2025	1
Testis_vs_Parenchyma	All_genes	Positive Regulation of Neurogenesis (GO:0050769)	'1/64	0.169862	0.252455	0	0	5.53578	9.81368	CUX2	GO_Biological_Process_2025	1
Testis_vs_Parenchyma	All_genes	Positive Regulation of Binding (GO:0051099)	'1/64	0.169862	0.252455	0	0	5.53578	9.81368	STMN1	GO_Biological_Process_2025	1
Testis_vs_Parenchyma	All_genes	Protein N-linked Glycosylation (GO:0006487)	'1/64	0.169862	0.252455	0	0	5.53578	9.81368	ST6GAL1	GO_Biological_Process_2025	1
Testis_vs_Parenchyma	All_genes	Positive Regulation of Cell Junction Assembly (GO:1901890)	'1/65	0.172277	0.254875	0	0	5.44901	9.58292	CUX2	GO_Biological_Process_2025	1
Testis_vs_Parenchyma	All_genes	Regulation of Cellular Localization (GO:0060341)	'1/67	0.177086	0.2608	0	0	5.28336	9.14612	MMD2	GO_Biological_Process_2025	1
Testis_vs_Parenchyma	All_genes	Positive Regulation of Intracellular Protein Transport (GO:0090316)	'1/69	0.181868	0.26543	0	0	5.12745	8.73959	VAMP2	GO_Biological_Process_2025	1
Testis_vs_Parenchyma	All_genes	Skin Development (GO:0043588)	'1/69	0.181868	0.26543	0	0	5.12745	8.73959	RYR1	GO_Biological_Process_2025	1
Testis_vs_Parenchyma	All_genes	Regulation of Heart Contraction (GO:0008016)	'1/70	0.184249	0.267698	0	0	5.05289	8.54678	CALM3	GO_Biological_Process_2025	1
Testis_vs_Parenchyma	All_genes	Regulation of G Protein-Coupled Receptor Signaling Pathway (GO:0008277)	'1/72	0.18899	0.273361	0	0	4.91006	8.18044	YWHAB	GO_Biological_Process_2025	1
Testis_vs_Parenchyma	All_genes	Calcium Ion Transmembrane Import Into Cytosol (GO:0097553)	'1/74	0.193705	0.278935	0	0	4.77505	7.83788	RYR1	GO_Biological_Process_2025	1
Testis_vs_Parenchyma	All_genes	Regulation of Stress Fiber Assembly (GO:0051492)	'1/75	0.196051	0.279473	0	0	4.71029	7.67484	STMN1	GO_Biological_Process_2025	1
Testis_vs_Parenchyma	All_genes	Positive Regulation of Secretion by Cell (GO:1903532)	'1/75	0.196051	0.279473	0	0	4.71029	7.67484	FRMD4A	GO_Biological_Process_2025	1
Testis_vs_Parenchyma	All_genes	Regulation of Rho Protein Signal Transduction (GO:0035023)	'1/76	0.198392	0.279473	0	0	4.64725	7.51699	STMN1	GO_Biological_Process_2025	1
Testis_vs_Parenchyma	All_genes	Positive Regulation of Protein Secretion (GO:0050714)	'1/76	0.198392	0.279473	0	0	4.64725	7.51699	FRMD4A	GO_Biological_Process_2025	1
Testis_vs_Parenchyma	All_genes	Negative Regulation of Supramolecular Fiber Organization (GO:1902904)	'1/76	0.198392	0.279473	0	0	4.64725	7.51699	STMN1	GO_Biological_Process_2025	1
Testis_vs_Parenchyma	All_genes	Proteolysis Involved in Protein Catabolic Process (GO:0051603)	'1/80	0.207686	0.2913	0	0	4.41106	6.93299	UBA52	GO_Biological_Process_2025	1
Testis_vs_Parenchyma	All_genes	Regulation of Cytokinesis (GO:0032465)	'1/81	0.209993	0.293266	0	0	4.3557	6.79787	CALM3	GO_Biological_Process_2025	1
Testis_vs_Parenchyma	All_genes	Regulation of Vesicle-Mediated Transport (GO:0060627)	'1/82	0.212293	0.293944	0	0	4.30171	6.66674	VAMP2	GO_Biological_Process_2025	1
Testis_vs_Parenchyma	All_genes	Response to Insulin (GO:0032868)	'1/82	0.212293	0.293944	0	0	4.30171	6.66674	VAMP2	GO_Biological_Process_2025	1
Testis_vs_Parenchyma	All_genes	Protein Tetramerization (GO:0051262)	'1/83	0.214587	0.294602	0	0	4.24904	6.53944	RYR1	GO_Biological_Process_2025	1
Testis_vs_Parenchyma	All_genes	Regulation of Protein Kinase Activity (GO:0045859)	'1/83	0.214587	0.294602	0	0	4.24904	6.53944	MMD2	GO_Biological_Process_2025	1
Testis_vs_Parenchyma	All_genes	Cytoskeleton-Dependent Cytokinesis (GO:0061640)	'1/84	0.216874	0.296486	0	0	4.19763	6.41582	STMN1	GO_Biological_Process_2025	1
Testis_vs_Parenchyma	All_genes	Actomyosin Structure Organization (GO:0031032)	'1/85	0.219155	0.297097	0	0	4.14745	6.29574	PHACTR1	GO_Biological_Process_2025	1
Testis_vs_Parenchyma	All_genes	Regulation of Cell Division (GO:0051302)	'1/85	0.219155	0.297097	0	0	4.14745	6.29574	CALM3	GO_Biological_Process_2025	1
Testis_vs_Parenchyma	All_genes	Positive Regulation of Protein Kinase Activity (GO:0045860)	'1/88	0.225957	0.303777	0	0	4.00383	5.95533	MMD2	GO_Biological_Process_2025	1
Testis_vs_Parenchyma	All_genes	Regulation of Mitotic Cell Cycle Phase Transition (GO:1901990)	'1/88	0.225957	0.303777	0	0	4.00383	5.95533	KCNH5	GO_Biological_Process_2025	1
Testis_vs_Parenchyma	All_genes	Protein Dephosphorylation (GO:0006470)	'1/90	0.23046	0.30728	0	0	3.91346	5.7437	PTPRT	GO_Biological_Process_2025	1
Testis_vs_Parenchyma	All_genes	Mitotic Spindle Organization (GO:0007052)	'1/90	0.23046	0.30728	0	0	3.91346	5.7437	STMN1	GO_Biological_Process_2025	1
Testis_vs_Parenchyma	All_genes	Protein O-linked Glycosylation (GO:0006493)	'1/91	0.232702	0.307737	0	0	3.86979	5.64213	ST6GAL1	GO_Biological_Process_2025	1
Testis_vs_Parenchyma	All_genes	Calcium-Mediated Signaling (GO:0019722)	'1/91	0.232702	0.307737	0	0	3.86979	5.64213	CALM3	GO_Biological_Process_2025	1
Testis_vs_Parenchyma	All_genes	Cellular Response to Peptide Hormone Stimulus (GO:0071375)	'1/94	0.239389	0.315293	0	0	3.74439	5.35322	VAMP2	GO_Biological_Process_2025	1
Testis_vs_Parenchyma	All_genes	Muscle Contraction (GO:0006936)	'1/97	0.246018	0.321411	0	0	3.62683	5.08608	RYR1	GO_Biological_Process_2025	1
Testis_vs_Parenchyma	All_genes	Regulation of Protein Localization (GO:0032880)	'1/97	0.246018	0.321411	0	0	3.62683	5.08608	MMD2	GO_Biological_Process_2025	1
Testis_vs_Parenchyma	All_genes	Positive Regulation of Protein Modification Process (GO:0031401)	'1/98	0.248216	0.322979	0	0	3.58926	5.00148	SVIP	GO_Biological_Process_2025	1
Testis_vs_Parenchyma	All_genes	Positive Regulation of Autophagy (GO:0010508)	'1/99	0.250407	0.323234	0	0	3.55245	4.91897	SVIP	GO_Biological_Process_2025	1
Testis_vs_Parenchyma	All_genes	Regulation of Protein Secretion (GO:0050708)	'1/99	0.250407	0.323234	0	0	3.55245	4.91897	FRMD4A	GO_Biological_Process_2025	1
Testis_vs_Parenchyma	All_genes	Cytoplasmic Translation (GO:0002181)	'1/101	0.25477	0.326266	0	0	3.48105	4.75998	UBA52	GO_Biological_Process_2025	1
Testis_vs_Parenchyma	All_genes	Sensory Perception of Light Stimulus (GO:0050953)	'1/101	0.25477	0.326266	0	0	3.48105	4.75998	PCDH15	GO_Biological_Process_2025	1
Testis_vs_Parenchyma	All_genes	Supramolecular Fiber Organization (GO:0097435)	'2/339	0.257943	0.329029	0	0	2.07768	2.8153	STMN1;MYO5C	GO_Biological_Process_2025	2
Testis_vs_Parenchyma	All_genes	Organic Anion Transport (GO:0015711)	'1/105	0.263421	0.333392	0	0	3.34649	4.46423	TMEM241	GO_Biological_Process_2025	1
Testis_vs_Parenchyma	All_genes	Positive Regulation of NF-kappaB Transcription Factor Activity (GO:0051092)	'1/105	0.263421	0.333392	0	0	3.34649	4.46423	ALK	GO_Biological_Process_2025	1
Testis_vs_Parenchyma	All_genes	Dephosphorylation (GO:0016311)	'1/107	0.267709	0.336193	0	0	3.28302	4.32654	PTPRT	GO_Biological_Process_2025	1
Testis_vs_Parenchyma	All_genes	Axon Development (GO:0061564)	'1/107	0.267709	0.336193	0	0	3.28302	4.32654	GRM7	GO_Biological_Process_2025	1
Testis_vs_Parenchyma	All_genes	Cellular Response to Insulin Stimulus (GO:0032869)	'1/108	0.269844	0.337566	0	0	3.25217	4.26005	VAMP2	GO_Biological_Process_2025	1
Testis_vs_Parenchyma	All_genes	Cellular Response to Metal Ion (GO:0071248)	'1/112	0.278324	0.346834	0	0	3.13434	4.00874	RYR1	GO_Biological_Process_2025	1
Testis_vs_Parenchyma	All_genes	Regulation of JNK Cascade (GO:0046328)	'1/115	0.28462	0.351972	0	0	3.0514	3.8344	AIDA	GO_Biological_Process_2025	1
Testis_vs_Parenchyma	All_genes	Positive Regulation of Cell Projection Organization (GO:0031346)	'1/115	0.28462	0.351972	0	0	3.0514	3.8344	CUX2	GO_Biological_Process_2025	1
Testis_vs_Parenchyma	All_genes	Negative Regulation of Catabolic Process (GO:0009895)	'1/120	0.294993	0.363413	0	0	2.92245	3.56774	ALK	GO_Biological_Process_2025	1
Testis_vs_Parenchyma	All_genes	Protein-Containing Complex Organization (GO:0043933)	'1/123	0.301146	0.369588	0	0	2.85016	3.42065	VAMP2	GO_Biological_Process_2025	1
Testis_vs_Parenchyma	All_genes	Calcium Ion Transport (GO:0006816)	'1/126	0.307246	0.375652	0	0	2.78133	3.28227	RYR1	GO_Biological_Process_2025	1
Testis_vs_Parenchyma	All_genes	Potassium Ion Transport (GO:0006813)	'1/127	0.309268	0.376702	0	0	2.75912	3.23796	KCNH5	GO_Biological_Process_2025	1
Testis_vs_Parenchyma	All_genes	Potassium Ion Transmembrane Transport (GO:0071805)	'1/134	0.323258	0.392268	0	0	2.61298	2.95085	KCNH5	GO_Biological_Process_2025	1
Testis_vs_Parenchyma	All_genes	Negative Regulation of Cell Motility (GO:2000146)	'1/139	0.333081	0.402034	0	0	2.51767	2.76785	PTPRT	GO_Biological_Process_2025	1
Testis_vs_Parenchyma	All_genes	Protein Autophosphorylation (GO:0046777)	'1/140	0.335028	0.402034	0	0	2.49943	2.73323	ALK	GO_Biological_Process_2025	1
Testis_vs_Parenchyma	All_genes	Intracellular Calcium Ion Homeostasis (GO:0006874)	'1/140	0.335028	0.402034	0	0	2.49943	2.73323	RYR1	GO_Biological_Process_2025	1
Testis_vs_Parenchyma	All_genes	Protein Homooligomerization (GO:0051260)	'1/143	0.340837	0.407496	0	0	2.44626	2.63303	RYR1	GO_Biological_Process_2025	1
Testis_vs_Parenchyma	All_genes	Regulation of Cell Cycle Process (GO:0010564)	'1/146	0.346597	0.412858	0	0	2.39528	2.53802	CALM3	GO_Biological_Process_2025	1
Testis_vs_Parenchyma	All_genes	Phosphate-Containing Compound Metabolic Process (GO:0006796)	'1/150	0.354199	0.420368	0	0	2.33051	2.41882	ALK	GO_Biological_Process_2025	1
Testis_vs_Parenchyma	All_genes	Skeletal System Development (GO:0001501)	'1/160	0.372827	0.440861	0	0	2.18283	2.15367	RFLNA	GO_Biological_Process_2025	1
Testis_vs_Parenchyma	All_genes	Cell-Cell Adhesion via Plasma-Membrane Adhesion Molecules (GO:0098742)	'1/171	0.392708	0.461005	0	0	2.04045	1.90719	PTPRT	GO_Biological_Process_2025	1
Testis_vs_Parenchyma	All_genes	Positive Regulation of Protein Phosphorylation (GO:0001934)	'1/171	0.392708	0.461005	0	0	2.04045	1.90719	MMD2	GO_Biological_Process_2025	1
Testis_vs_Parenchyma	All_genes	Nitrogen Compound Transport (GO:0071705)	'1/172	0.394484	0.461418	0	0	2.02842	1.88679	VAMP2	GO_Biological_Process_2025	1
Testis_vs_Parenchyma	All_genes	Membrane Organization (GO:0061024)	'1/173	0.396255	0.461823	0	0	2.01652	1.86669	VAMP2	GO_Biological_Process_2025	1
Testis_vs_Parenchyma	All_genes	Positive Regulation of DNA-binding Transcription Factor Activity (GO:0051091)	'1/174	0.398022	0.462219	0	0	2.00477	1.84689	ALK	GO_Biological_Process_2025	1
Testis_vs_Parenchyma	All_genes	Regulation of Cell Migration (GO:0030334)	'2/479	0.406213	0.470046	0	0	1.4574	1.31294	PTPRT;PHACTR1	GO_Biological_Process_2025	2
Testis_vs_Parenchyma	All_genes	Neuron Differentiation (GO:0030182)	'1/181	0.410243	0.473021	0	0	1.92612	1.71618	ALK	GO_Biological_Process_2025	1
Testis_vs_Parenchyma	All_genes	Positive Regulation of Catabolic Process (GO:0009896)	'1/183	0.41369	0.475303	0	0	1.90476	1.68122	SVIP	GO_Biological_Process_2025	1
Testis_vs_Parenchyma	All_genes	Negative Regulation of Cell Migration (GO:0030336)	'1/184	0.415406	0.475588	0	0	1.89426	1.6641	PTPRT	GO_Biological_Process_2025	1
Testis_vs_Parenchyma	All_genes	Macromolecule Biosynthetic Process (GO:0009059)	'1/189	0.423912	0.481921	0	0	1.84341	1.58207	UBA52	GO_Biological_Process_2025	1
Testis_vs_Parenchyma	All_genes	Anterograde Trans-Synaptic Signaling (GO:0098916)	'1/189	0.423912	0.481921	0	0	1.84341	1.58207	GRM7	GO_Biological_Process_2025	1
Testis_vs_Parenchyma	All_genes	Regulation of Programmed Cell Death (GO:0043067)	'1/195	0.433959	0.491618	0	0	1.78586	1.49084	ALK	GO_Biological_Process_2025	1
Testis_vs_Parenchyma	All_genes	Regulation of Cell Differentiation (GO:0045595)	'1/201	0.443834	0.501053	0	0	1.73175	1.40671	ALK	GO_Biological_Process_2025	1
Testis_vs_Parenchyma	All_genes	Adenylate Cyclase-Modulating G Protein-Coupled Receptor Signaling Pathway (GO:0007188)	'1/202	0.445463	0.501146	0	0	1.72305	1.39333	GRM7	GO_Biological_Process_2025	1
Testis_vs_Parenchyma	All_genes	Modification-Dependent Protein Catabolic Process (GO:0019941)	'1/208	0.455141	0.510262	0	0	1.6726	1.31658	UBA52	GO_Biological_Process_2025	1
Testis_vs_Parenchyma	All_genes	Regulation of Signal Transduction (GO:0009966)	'1/211	0.459917	0.513838	0	0	1.64845	1.28037	UBASH3B	GO_Biological_Process_2025	1
Testis_vs_Parenchyma	All_genes	Protein Modification Process (GO:0036211)	'2/545	0.47162	0.525103	0	0	1.27591	0.958954	PTPRT;UBA52	GO_Biological_Process_2025	2
Testis_vs_Parenchyma	All_genes	Regulation of Autophagy (GO:0010506)	'1/230	0.489225	0.542839	0	0	1.51023	1.07971	SVIP	GO_Biological_Process_2025	1
Testis_vs_Parenchyma	All_genes	Translation (GO:0006412)	'1/232	0.492218	0.544296	0	0	1.497	1.06112	UBA52	GO_Biological_Process_2025	1
Testis_vs_Parenchyma	All_genes	Positive Regulation of Developmental Process (GO:0051094)	'1/245	0.511254	0.563423	0	0	1.41631	0.950183	ALK	GO_Biological_Process_2025	1
Testis_vs_Parenchyma	All_genes	Regulation of Inflammatory Response (GO:0050727)	'1/249	0.516969	0.56779	0	0	1.39318	0.919181	VAMP2	GO_Biological_Process_2025	1
Testis_vs_Parenchyma	All_genes	Positive Regulation of Signal Transduction (GO:0009967)	'1/256	0.526813	0.576647	0	0	1.35445	0.868083	CUX2	GO_Biological_Process_2025	1
Testis_vs_Parenchyma	All_genes	Chemical Synaptic Transmission (GO:0007268)	'1/260	0.532349	0.578796	0	0	1.33327	0.840565	GRM7	GO_Biological_Process_2025	1
Testis_vs_Parenchyma	All_genes	Regulation of MAPK Cascade (GO:0043408)	'1/260	0.532349	0.578796	0	0	1.33327	0.840565	PEBP1	GO_Biological_Process_2025	1
Testis_vs_Parenchyma	All_genes	Cellular Component Assembly (GO:0022607)	'1/277	0.555176	0.601595	0	0	1.25006	0.735626	VAMP2	GO_Biological_Process_2025	1
Testis_vs_Parenchyma	All_genes	Cellular Response to Cytokine Stimulus (GO:0071345)	'1/289	0.570626	0.616276	0	0	1.19725	0.671681	PTPRT	GO_Biological_Process_2025	1
Testis_vs_Parenchyma	All_genes	Negative Regulation of Intracellular Signal Transduction (GO:1902532)	'1/297	0.580632	0.622193	0	0	1.16441	0.633021	PEBP1	GO_Biological_Process_2025	1
Testis_vs_Parenchyma	All_genes	Positive Regulation of Cell Differentiation (GO:0045597)	'1/297	0.580632	0.622193	0	0	1.16441	0.633021	MMD2	GO_Biological_Process_2025	1
Testis_vs_Parenchyma	All_genes	Phosphorylation (GO:0016310)	'1/298	0.581866	0.622193	0	0	1.16043	0.628393	ALK	GO_Biological_Process_2025	1
Testis_vs_Parenchyma	All_genes	Monoatomic Cation Transmembrane Transport (GO:0098655)	'1/304	0.589198	0.627962	0	0	1.13711	0.601521	KCNH5	GO_Biological_Process_2025	1
Testis_vs_Parenchyma	All_genes	Inorganic Cation Transmembrane Transport (GO:0098662)	'1/307	0.592817	0.628958	0	0	1.12579	0.58864	KCNH5	GO_Biological_Process_2025	1
Testis_vs_Parenchyma	All_genes	Protein Transport (GO:0015031)	'1/308	0.594016	0.628958	0	0	1.12206	0.584425	VAMP2	GO_Biological_Process_2025	1
Testis_vs_Parenchyma	All_genes	Protein Modification by Small Protein Conjugation (GO:0032446)	'1/316	0.603486	0.636904	0	0	1.09312	0.552062	UBA52	GO_Biological_Process_2025	1
Testis_vs_Parenchyma	All_genes	Protein-Containing Complex Assembly (GO:0065003)	'1/323	0.611594	0.643365	0	0	1.06898	0.525602	VAMP2	GO_Biological_Process_2025	1
Testis_vs_Parenchyma	All_genes	Positive Regulation of Macromolecule Biosynthetic Process (GO:0010557)	'1/355	0.64663	0.67802	0	0	0.97076	0.423233	CUX2	GO_Biological_Process_2025	1
Testis_vs_Parenchyma	All_genes	Protein Ubiquitination (GO:0016567)	'1/369	0.660964	0.690528	0	0	0.933162	0.386381	UBA52	GO_Biological_Process_2025	1
Testis_vs_Parenchyma	All_genes	Protein Localization (GO:0008104)	'1/371	0.662964	0.690528	0	0	0.928023	0.381449	YWHAB	GO_Biological_Process_2025	1
Testis_vs_Parenchyma	All_genes	Protein Phosphorylation (GO:0006468)	'1/373	0.664953	0.690528	0	0	0.922939	0.376595	ALK	GO_Biological_Process_2025	1
Testis_vs_Parenchyma	All_genes	Gene Expression (GO:0010467)	'1/381	0.672794	0.696438	0	0	0.903139	0.357929	UBA52	GO_Biological_Process_2025	1
Testis_vs_Parenchyma	All_genes	Positive Regulation of Gene Expression (GO:0010628)	'1/436	0.722026	0.74502	0	0	0.786731	0.256234	CUX2	GO_Biological_Process_2025	1
Testis_vs_Parenchyma	All_genes	Positive Regulation of Transcription by RNA Polymerase II (GO:0045944)	'2/983	0.78548	0.807923	0	0	0.690294	0.166678	YWHAB;PTOV1	GO_Biological_Process_2025	2
Testis_vs_Parenchyma	All_genes	Protein Metabolic Process (GO:0019538)	'1/614	0.836529	0.857707	0	0	0.55319	0.098741	UBA52	GO_Biological_Process_2025	1
Testis_vs_Parenchyma	All_genes	Regulation of Apoptotic Process (GO:0042981)	'1/704	0.875246	0.894573	0	0	0.480123	0.0639767	ALK	GO_Biological_Process_2025	1
Testis_vs_Parenchyma	All_genes	Negative Regulation of Transcription by RNA Polymerase II (GO:0000122)	'1/732	0.885337	0.902041	0	0	0.46106	0.0561512	CUX2	GO_Biological_Process_2025	1
Testis_vs_Parenchyma	All_genes	Positive Regulation of DNA-templated Transcription (GO:0045893)	'2/1274	0.891623	0.905598	0	0	0.524203	0.0601325	YWHAB;PTOV1	GO_Biological_Process_2025	2
Testis_vs_Parenchyma	All_genes	Regulation of Cell Population Proliferation (GO:0042127)	'1/769	0.89745	0.908668	0	0	0.438003	0.047391	ALK	GO_Biological_Process_2025	1
Testis_vs_Parenchyma	All_genes	Negative Regulation of DNA-templated Transcription (GO:0045892)	'1/1006	0.950097	0.958977	0	0	0.330575	0.0169224	CUX2	GO_Biological_Process_2025	1
Testis_vs_Parenchyma	All_genes	Regulation of Gene Expression (GO:0010468)	'1/1127	0.965572	0.968754	0	0	0.293166	0.0102709	CUX2	GO_Biological_Process_2025	1
Testis_vs_Parenchyma	All_genes	Regulation of Transcription by RNA Polymerase II (GO:0006357)	'3/2250	0.965764	0.968754	0	0	0.429542	0.0149632	CUX2;YWHAB;PTOV1	GO_Biological_Process_2025	3
Testis_vs_Parenchyma	All_genes	Regulation of DNA-templated Transcription (GO:0006355)	'1/2139	0.998596	0.998596	0	0	0.146095	0.000205232	CUX2	GO_Biological_Process_2025	1
Testis_vs_Parenchyma	Both_downregulated	Long-Term Synaptic Potentiation (GO:0060291)	'2/28	0.000390426	0.0390161	0	0	80.7814	633.994	CALM3;VAMP2	GO_Biological_Process_2025	2
Testis_vs_Parenchyma	Both_downregulated	Natural Killer Cell Mediated Cytotoxicity (GO:0042267)	'2/32	0.000511011	0.0390161	0	0	69.9965	530.512	TUBB4B;VAMP2	GO_Biological_Process_2025	2
Testis_vs_Parenchyma	Both_downregulated	Negative Regulation of G Protein-Coupled Receptor Signaling Pathway (GO:0045744)	'2/39	0.000760055	0.0390161	0	0	56.734	407.47	YWHAB;STMN1	GO_Biological_Process_2025	2
Testis_vs_Parenchyma	Both_downregulated	Negative Regulation of Protein-Containing Complex Assembly (GO:0031333)	'2/59	0.00173295	0.0603948	0	0	36.7904	233.911	AIDA;SVIP	GO_Biological_Process_2025	2
Testis_vs_Parenchyma	Both_downregulated	Negative Regulation of Cellular Component Organization (GO:0051129)	'2/80	0.00315837	0.0603948	0	0	26.857	154.634	AIDA;SVIP	GO_Biological_Process_2025	2
Testis_vs_Parenchyma	Both_downregulated	Positive Regulation of Synaptic Transmission (GO:0050806)	'2/84	0.00347541	0.0603948	0	0	25.5417	144.618	CALM3;VAMP2	GO_Biological_Process_2025	2
Testis_vs_Parenchyma	Both_downregulated	Natural Killer Cell Degranulation (GO:0043320)	'1/5	0.00523944	0.0603948	0	0	249.688	1311.24	VAMP2	GO_Biological_Process_2025	1
Testis_vs_Parenchyma	Both_downregulated	Neutrophil Degranulation (GO:0043312)	'1/5	0.00523944	0.0603948	0	0	249.688	1311.24	VAMP2	GO_Biological_Process_2025	1
Testis_vs_Parenchyma	Both_downregulated	Hepatocyte Growth Factor Receptor Signaling Pathway (GO:0048012)	'1/6	0.00628419	0.0603948	0	0	199.74	1012.63	STMN1	GO_Biological_Process_2025	1
Testis_vs_Parenchyma	Both_downregulated	Negative Regulation of ERAD Pathway (GO:1904293)	'1/6	0.00628419	0.0603948	0	0	199.74	1012.63	SVIP	GO_Biological_Process_2025	1
Testis_vs_Parenchyma	Both_downregulated	Regulation of High Voltage-Gated Calcium Channel Activity (GO:1901841)	'1/6	0.00628419	0.0603948	0	0	199.74	1012.63	CALM3	GO_Biological_Process_2025	1
Testis_vs_Parenchyma	Both_downregulated	Regulation of Histamine Secretion by Mast Cell (GO:1903593)	'1/6	0.00628419	0.0603948	0	0	199.74	1012.63	VAMP2	GO_Biological_Process_2025	1
Testis_vs_Parenchyma	Both_downregulated	Regulation of Protein Lipidation (GO:1903059)	'1/6	0.00628419	0.0603948	0	0	199.74	1012.63	SVIP	GO_Biological_Process_2025	1
Testis_vs_Parenchyma	Both_downregulated	Positive Regulation of Ryanodine-Sensitive Calcium-Release Channel Activity (GO:0060316)	'1/7	0.0073279	0.0603948	0	0	166.442	818.238	CALM3	GO_Biological_Process_2025	1
Testis_vs_Parenchyma	Both_downregulated	Negative Regulation of Voltage-Gated Calcium Channel Activity (GO:1901386)	'1/7	0.0073279	0.0603948	0	0	166.442	818.238	CALM3	GO_Biological_Process_2025	1
Testis_vs_Parenchyma	Both_downregulated	Regulation of Protein-Containing Complex Assembly (GO:0043254)	'2/126	0.00764583	0.0603948	0	0	16.8548	82.1436	AIDA;SVIP	GO_Biological_Process_2025	2
Testis_vs_Parenchyma	Both_downregulated	Negative Regulation of MAPK Cascade (GO:0043409)	'2/127	0.00776327	0.0603948	0	0	16.7192	81.2275	PEBP1;AIDA	GO_Biological_Process_2025	2
Testis_vs_Parenchyma	Both_downregulated	Negative Regulation of Retrograde Protein Transport, ER to Cytosol (GO:1904153)	'1/8	0.00837056	0.0603948	0	0	142.657	682.334	SVIP	GO_Biological_Process_2025	1
Testis_vs_Parenchyma	Both_downregulated	Negative Regulation of Ryanodine-Sensitive Calcium-Release Channel Activity (GO:0060315)	'1/8	0.00837056	0.0603948	0	0	142.657	682.334	CALM3	GO_Biological_Process_2025	1
Testis_vs_Parenchyma	Both_downregulated	Negative Regulation of Protein Exit From Endoplasmic Reticulum (GO:0070862)	'1/9	0.00941218	0.0603948	0	0	124.819	582.373	SVIP	GO_Biological_Process_2025	1
Testis_vs_Parenchyma	Both_downregulated	Regulation of Delayed Rectifier Potassium Channel Activity (GO:1902259)	'1/9	0.00941218	0.0603948	0	0	124.819	582.373	VAMP2	GO_Biological_Process_2025	1
Testis_vs_Parenchyma	Both_downregulated	Negative Regulation of Release of Sequestered Calcium Ion Into Cytosol (GO:0051280)	'1/9	0.00941218	0.0603948	0	0	124.819	582.373	CALM3	GO_Biological_Process_2025	1
Testis_vs_Parenchyma	Both_downregulated	SNARE Complex Assembly (GO:0035493)	'1/9	0.00941218	0.0603948	0	0	124.819	582.373	VAMP2	GO_Biological_Process_2025	1
Testis_vs_Parenchyma	Both_downregulated	Modification-Dependent Macromolecule Catabolic Process (GO:0043632)	'1/9	0.00941218	0.0603948	0	0	124.819	582.373	UBA52	GO_Biological_Process_2025	1
Testis_vs_Parenchyma	Both_downregulated	Negative Regulation of Protein Import Into Nucleus (GO:0042308)	'1/10	0.0104528	0.0642606	0	0	110.944	506.005	YWHAB	GO_Biological_Process_2025	1
Testis_vs_Parenchyma	Both_downregulated	Regulation of Cell Communication by Electrical Coupling Involved in Cardiac Conduction (GO:1901844)	'1/11	0.0114923	0.0642606	0	0	99.845	445.916	CALM3	GO_Biological_Process_2025	1
Testis_vs_Parenchyma	Both_downregulated	Neutrophil Activation Involved in Immune Response (GO:0002283)	'1/11	0.0114923	0.0642606	0	0	99.845	445.916	VAMP2	GO_Biological_Process_2025	1
Testis_vs_Parenchyma	Both_downregulated	Regulation of Retrograde Protein Transport, ER to Cytosol (GO:1904152)	'1/12	0.0125308	0.0642606	0	0	90.7636	397.505	SVIP	GO_Biological_Process_2025	1
Testis_vs_Parenchyma	Both_downregulated	Detection of Calcium Ion (GO:0005513)	'1/12	0.0125308	0.0642606	0	0	90.7636	397.505	CALM3	GO_Biological_Process_2025	1
Testis_vs_Parenchyma	Both_downregulated	Negative Regulation of Microtubule Polymerization (GO:0031115)	'1/12	0.0125308	0.0642606	0	0	90.7636	397.505	STMN1	GO_Biological_Process_2025	1
Testis_vs_Parenchyma	Both_downregulated	Regulation of Cell Communication by Electrical Coupling (GO:0010649)	'1/13	0.0135683	0.0642606	0	0	83.1958	357.744	CALM3	GO_Biological_Process_2025	1
Testis_vs_Parenchyma	Both_downregulated	Calcium-Ion Regulated Exocytosis (GO:0017156)	'1/14	0.0146047	0.0642606	0	0	76.7923	324.556	VAMP2	GO_Biological_Process_2025	1
Testis_vs_Parenchyma	Both_downregulated	Neuron Cell-Cell Adhesion (GO:0007158)	'1/14	0.0146047	0.0642606	0	0	76.7923	324.556	NCAM2	GO_Biological_Process_2025	1
Testis_vs_Parenchyma	Both_downregulated	Regulation of Potassium Ion Transmembrane Transporter Activity (GO:1901016)	'1/14	0.0146047	0.0642606	0	0	76.7923	324.556	VAMP2	GO_Biological_Process_2025	1
Testis_vs_Parenchyma	Both_downregulated	Neutrophil Mediated Immunity (GO:0002446)	'1/14	0.0146047	0.0642606	0	0	76.7923	324.556	VAMP2	GO_Biological_Process_2025	1
Testis_vs_Parenchyma	Both_downregulated	Arp2/3 Complex-Mediated Actin Nucleation (GO:0034314)	'1/15	0.0156401	0.0647824	0	0	71.3036	296.475	ARPC5	GO_Biological_Process_2025	1
Testis_vs_Parenchyma	Both_downregulated	Regulation of Hormone Secretion (GO:0046883)	'1/15	0.0156401	0.0647824	0	0	71.3036	296.475	VAMP2	GO_Biological_Process_2025	1
Testis_vs_Parenchyma	Both_downregulated	Regulation of Ryanodine-Sensitive Calcium-Release Channel Activity (GO:0060314)	'1/16	0.0166744	0.0647824	0	0	66.5467	272.434	CALM3	GO_Biological_Process_2025	1
Testis_vs_Parenchyma	Both_downregulated	Microtubule Depolymerization (GO:0007019)	'1/16	0.0166744	0.0647824	0	0	66.5467	272.434	STMN1	GO_Biological_Process_2025	1
Testis_vs_Parenchyma	Both_downregulated	Calcineurin-Mediated Signaling (GO:0097720)	'1/17	0.0177077	0.0647824	0	0	62.3844	251.643	CALM3	GO_Biological_Process_2025	1
Testis_vs_Parenchyma	Both_downregulated	Negative Regulation of Intracellular Protein Transport (GO:0090317)	'1/17	0.0177077	0.0647824	0	0	62.3844	251.643	YWHAB	GO_Biological_Process_2025	1
Testis_vs_Parenchyma	Both_downregulated	Reg of Cardiac Muscle Contraction by Reg of the Release of Sequestered Calcium Ion (GO:0010881)	'1/17	0.0177077	0.0647824	0	0	62.3844	251.643	CALM3	GO_Biological_Process_2025	1
Testis_vs_Parenchyma	Both_downregulated	Positive Regulation of Calcium Ion Transmembrane Transporter Activity (GO:1901021)	'1/18	0.01874	0.0647824	0	0	58.7118	233.502	CALM3	GO_Biological_Process_2025	1
Testis_vs_Parenchyma	Both_downregulated	Negative Regulation of Nucleocytoplasmic Transport (GO:0046823)	'1/18	0.01874	0.0647824	0	0	58.7118	233.502	YWHAB	GO_Biological_Process_2025	1
Testis_vs_Parenchyma	Both_downregulated	Actin Nucleation (GO:0045010)	'1/19	0.0197713	0.0647824	0	0	55.4472	217.549	ARPC5	GO_Biological_Process_2025	1
Testis_vs_Parenchyma	Both_downregulated	Negative Regulation of Rho Protein Signal Transduction (GO:0035024)	'1/19	0.0197713	0.0647824	0	0	55.4472	217.549	STMN1	GO_Biological_Process_2025	1
Testis_vs_Parenchyma	Both_downregulated	Negative Regulation of Calcium Ion Transmembrane Transporter Activity (GO:1901020)	'1/19	0.0197713	0.0647824	0	0	55.4472	217.549	CALM3	GO_Biological_Process_2025	1
Testis_vs_Parenchyma	Both_downregulated	Presynaptic Endocytosis (GO:0140238)	'1/20	0.0208015	0.0666708	0	0	52.5263	203.42	VAMP2	GO_Biological_Process_2025	1
Testis_vs_Parenchyma	Both_downregulated	Establishment of Skin Barrier (GO:0061436)	'1/21	0.0218307	0.0666708	0	0	49.8975	190.83	STMN1	GO_Biological_Process_2025	1
Testis_vs_Parenchyma	Both_downregulated	Negative Regulation of Cation Channel Activity (GO:2001258)	'1/21	0.0218307	0.0666708	0	0	49.8975	190.83	CALM3	GO_Biological_Process_2025	1
Testis_vs_Parenchyma	Both_downregulated	Natural Killer Cell Activation Involved in Immune Response (GO:0002323)	'1/22	0.0228588	0.0666708	0	0	47.519	179.547	VAMP2	GO_Biological_Process_2025	1
Testis_vs_Parenchyma	Both_downregulated	Regulation of Cardiac Muscle Contraction by Calcium Ion Signaling (GO:0010882)	'1/22	0.0228588	0.0666708	0	0	47.519	179.547	CALM3	GO_Biological_Process_2025	1
Testis_vs_Parenchyma	Both_downregulated	Regulation of ERAD Pathway (GO:1904292)	'1/23	0.0238859	0.0666708	0	0	45.3568	169.383	SVIP	GO_Biological_Process_2025	1
Testis_vs_Parenchyma	Both_downregulated	Skin Epidermis Development (GO:0098773)	'1/23	0.0238859	0.0666708	0	0	45.3568	169.383	STMN1	GO_Biological_Process_2025	1
Testis_vs_Parenchyma	Both_downregulated	Regulation of Release of Sequestered Calcium Ion Into Cytosol by Sarcoplasmic Reticulum (GO:0010880)	'1/24	0.024912	0.0666708	0	0	43.3826	160.186	CALM3	GO_Biological_Process_2025	1
Testis_vs_Parenchyma	Both_downregulated	Negative Regulation of Stress Fiber Assembly (GO:0051497)	'1/24	0.024912	0.0666708	0	0	43.3826	160.186	STMN1	GO_Biological_Process_2025	1
Testis_vs_Parenchyma	Both_downregulated	Response to Hexose (GO:0009746)	'1/25	0.0259371	0.0666708	0	0	41.5729	151.828	VAMP2	GO_Biological_Process_2025	1
Testis_vs_Parenchyma	Both_downregulated	Negative Regulation of Protein Localization to Nucleus (GO:1900181)	'1/26	0.0269611	0.0666708	0	0	39.908	144.202	YWHAB	GO_Biological_Process_2025	1
Testis_vs_Parenchyma	Both_downregulated	Protein Depolymerization (GO:0051261)	'1/26	0.0269611	0.0666708	0	0	39.908	144.202	STMN1	GO_Biological_Process_2025	1
Testis_vs_Parenchyma	Both_downregulated	Microtubule Polymerization or Depolymerization (GO:0031109)	'1/26	0.0269611	0.0666708	0	0	39.908	144.202	STMN1	GO_Biological_Process_2025	1
Testis_vs_Parenchyma	Both_downregulated	Regulation of Microtubule Polymerization or Depolymerization (GO:0031110)	'1/27	0.0279842	0.0666708	0	0	38.3712	137.22	STMN1	GO_Biological_Process_2025	1
Testis_vs_Parenchyma	Both_downregulated	Negative Regulation of Actin Filament Bundle Assembly (GO:0032232)	'1/27	0.0279842	0.0666708	0	0	38.3712	137.22	STMN1	GO_Biological_Process_2025	1
Testis_vs_Parenchyma	Both_downregulated	Regulation of Cation Channel Activity (GO:2001257)	'1/27	0.0279842	0.0666708	0	0	38.3712	137.22	VAMP2	GO_Biological_Process_2025	1
Testis_vs_Parenchyma	Both_downregulated	Negative Regulation of Protein Polymerization (GO:0032272)	'1/28	0.0290061	0.0666708	0	0	36.9481	130.806	STMN1	GO_Biological_Process_2025	1
Testis_vs_Parenchyma	Both_downregulated	Regulation of Striated Muscle Contraction (GO:0006942)	'1/28	0.0290061	0.0666708	0	0	36.9481	130.806	CALM3	GO_Biological_Process_2025	1
Testis_vs_Parenchyma	Both_downregulated	Membrane Fusion (GO:0061025)	'1/28	0.0290061	0.0666708	0	0	36.9481	130.806	VAMP2	GO_Biological_Process_2025	1
Testis_vs_Parenchyma	Both_downregulated	Regulation of Cardiac Muscle Cell Action Potential (GO:0098901)	'1/28	0.0290061	0.0666708	0	0	36.9481	130.806	CALM3	GO_Biological_Process_2025	1
Testis_vs_Parenchyma	Both_downregulated	Synaptic Vesicle Endocytosis (GO:0048488)	'1/29	0.0300271	0.0667319	0	0	35.6268	124.895	VAMP2	GO_Biological_Process_2025	1
Testis_vs_Parenchyma	Both_downregulated	Negative Regulation of Response to Endoplasmic Reticulum Stress (GO:1903573)	'1/30	0.0310471	0.0667319	0	0	34.3966	119.433	SVIP	GO_Biological_Process_2025	1
Testis_vs_Parenchyma	Both_downregulated	Positive Regulation of Cation Channel Activity (GO:2001259)	'1/30	0.0310471	0.0667319	0	0	34.3966	119.433	CALM3	GO_Biological_Process_2025	1
Testis_vs_Parenchyma	Both_downregulated	Dorsal/Ventral Pattern Formation (GO:0009953)	'1/30	0.0310471	0.0667319	0	0	34.3966	119.433	AIDA	GO_Biological_Process_2025	1
Testis_vs_Parenchyma	Both_downregulated	Natural Killer Cell Mediated Immunity (GO:0002228)	'1/31	0.032066	0.0667319	0	0	33.2483	114.373	TUBB4B	GO_Biological_Process_2025	1
Testis_vs_Parenchyma	Both_downregulated	Negative Regulation of MAP Kinase Activity (GO:0043407)	'1/31	0.032066	0.0667319	0	0	33.2483	114.373	AIDA	GO_Biological_Process_2025	1
Testis_vs_Parenchyma	Both_downregulated	Golgi to Plasma Membrane Protein Transport (GO:0043001)	'1/31	0.032066	0.0667319	0	0	33.2483	114.373	VAMP2	GO_Biological_Process_2025	1
Testis_vs_Parenchyma	Both_downregulated	Signal Release From Synapse (GO:0099643)	'1/33	0.0341008	0.0693329	0	0	31.1672	105.296	VAMP2	GO_Biological_Process_2025	1
Testis_vs_Parenchyma	Both_downregulated	Synaptic Vesicle Recycling (GO:0036465)	'1/34	0.0351166	0.0693329	0	0	30.2212	101.213	VAMP2	GO_Biological_Process_2025	1
Testis_vs_Parenchyma	Both_downregulated	Negative Regulation of Microtubule Polymerization or Depolymerization (GO:0031111)	'1/34	0.0351166	0.0693329	0	0	30.2212	101.213	STMN1	GO_Biological_Process_2025	1
Testis_vs_Parenchyma	Both_downregulated	Regulation of Cardiac Muscle Contraction (GO:0055117)	'1/34	0.0351166	0.0693329	0	0	30.2212	101.213	CALM3	GO_Biological_Process_2025	1
Testis_vs_Parenchyma	Both_downregulated	Neurotransmitter Secretion (GO:0007269)	'1/35	0.0361315	0.0704336	0	0	29.3309	97.3958	VAMP2	GO_Biological_Process_2025	1
Testis_vs_Parenchyma	Both_downregulated	Positive Regulation of Release of Sequestered Calcium Ion Into Cytosol (GO:0051281)	'1/36	0.0371453	0.0715048	0	0	28.4914	93.8199	CALM3	GO_Biological_Process_2025	1
Testis_vs_Parenchyma	Both_downregulated	Regulation of Microtubule Cytoskeleton Organization (GO:0070507)	'1/38	0.03917	0.0735631	0	0	26.9486	87.3095	STMN1	GO_Biological_Process_2025	1
Testis_vs_Parenchyma	Both_downregulated	Regulation of Intracellular Protein Transport (GO:0033157)	'1/38	0.03917	0.0735631	0	0	26.9486	87.3095	VAMP2	GO_Biological_Process_2025	1
Testis_vs_Parenchyma	Both_downregulated	Establishment of Protein Localization to Plasma Membrane (GO:0061951)	'1/41	0.0421993	0.0773653	0	0	24.9237	78.8924	VAMP2	GO_Biological_Process_2025	1
Testis_vs_Parenchyma	Both_downregulated	Regulation of Protein Import Into Nucleus (GO:0042306)	'1/41	0.0421993	0.0773653	0	0	24.9237	78.8924	YWHAB	GO_Biological_Process_2025	1
Testis_vs_Parenchyma	Both_downregulated	Synaptic Vesicle Exocytosis (GO:0016079)	'1/43	0.0442138	0.0800437	0	0	23.7345	74.0213	VAMP2	GO_Biological_Process_2025	1
Testis_vs_Parenchyma	Both_downregulated	Regulated Exocytosis (GO:0045055)	'1/44	0.0452195	0.0800437	0	0	23.1814	71.7749	VAMP2	GO_Biological_Process_2025	1
Testis_vs_Parenchyma	Both_downregulated	Substantia Nigra Development (GO:0021762)	'1/44	0.0452195	0.0800437	0	0	23.1814	71.7749	CALM3	GO_Biological_Process_2025	1
Testis_vs_Parenchyma	Both_downregulated	Synaptic Vesicle Cycle (GO:0099504)	'1/45	0.0462242	0.0808123	0	0	22.6534	69.6423	VAMP2	GO_Biological_Process_2025	1
Testis_vs_Parenchyma	Both_downregulated	Regulation of Transport (GO:0051049)	'1/46	0.047228	0.0808123	0	0	22.1489	67.6154	VAMP2	GO_Biological_Process_2025	1
Testis_vs_Parenchyma	Both_downregulated	Negative Regulation of Proteasomal Protein Catabolic Process (GO:1901799)	'1/46	0.047228	0.0808123	0	0	22.1489	67.6154	SVIP	GO_Biological_Process_2025	1
Testis_vs_Parenchyma	Both_downregulated	Regulation of Exocytosis (GO:0017157)	'1/48	0.0492324	0.0831817	0	0	21.2043	63.8503	VAMP2	GO_Biological_Process_2025	1
Testis_vs_Parenchyma	Both_downregulated	Positive Regulation of Intracellular Transport (GO:0032388)	'1/49	0.0502331	0.0831817	0	0	20.7615	62.0992	VAMP2	GO_Biological_Process_2025	1
Testis_vs_Parenchyma	Both_downregulated	Negative Regulation of Small GTPase Mediated Signal Transduction (GO:0051058)	'1/49	0.0502331	0.0831817	0	0	20.7615	62.0992	STMN1	GO_Biological_Process_2025	1
Testis_vs_Parenchyma	Both_downregulated	Response to Glucose (GO:0009749)	'1/51	0.0522315	0.08467	0	0	19.929	58.8318	VAMP2	GO_Biological_Process_2025	1
Testis_vs_Parenchyma	Both_downregulated	Regulation of Secretion by Cell (GO:1903530)	'1/51	0.0522315	0.08467	0	0	19.929	58.8318	VAMP2	GO_Biological_Process_2025	1
Testis_vs_Parenchyma	Both_downregulated	Regulation of Release of Sequestered Calcium Ion Into Cytosol (GO:0051279)	'1/53	0.0542259	0.0860906	0	0	19.1606	55.8454	CALM3	GO_Biological_Process_2025	1
Testis_vs_Parenchyma	Both_downregulated	Regulation of Microtubule Polymerization (GO:0031113)	'1/53	0.0542259	0.0860906	0	0	19.1606	55.8454	STMN1	GO_Biological_Process_2025	1
Testis_vs_Parenchyma	Both_downregulated	Golgi to Plasma Membrane Transport (GO:0006893)	'1/55	0.0562163	0.0883399	0	0	18.4491	53.1066	VAMP2	GO_Biological_Process_2025	1
Testis_vs_Parenchyma	Both_downregulated	Microtubule Cytoskeleton Organization Involved in Mitosis (GO:1902850)	'1/59	0.0601851	0.0936213	0	0	17.1733	48.2626	STMN1	GO_Biological_Process_2025	1
Testis_vs_Parenchyma	Both_downregulated	Mitotic Cytokinesis (GO:0000281)	'1/62	0.0631513	0.097253	0	0	16.3262	45.0967	STMN1	GO_Biological_Process_2025	1
Testis_vs_Parenchyma	Both_downregulated	Positive Regulation of Binding (GO:0051099)	'1/64	0.0651238	0.0992977	0	0	15.8063	43.1745	STMN1	GO_Biological_Process_2025	1
Testis_vs_Parenchyma	Both_downregulated	Positive Regulation of Intracellular Protein Transport (GO:0090316)	'1/69	0.0700378	0.105743	0	0	14.6404	38.9248	VAMP2	GO_Biological_Process_2025	1
Testis_vs_Parenchyma	Both_downregulated	Regulation of Heart Contraction (GO:0008016)	'1/70	0.0710176	0.106182	0	0	14.4275	38.1583	CALM3	GO_Biological_Process_2025	1
Testis_vs_Parenchyma	Both_downregulated	Regulation of G Protein-Coupled Receptor Signaling Pathway (GO:0008277)	'1/72	0.0729744	0.108058	0	0	14.0197	36.6987	YWHAB	GO_Biological_Process_2025	1
Testis_vs_Parenchyma	Both_downregulated	Positive Regulation of Protein Transport (GO:0051222)	'1/73	0.0739513	0.108462	0	0	13.8243	36.0033	VAMP2	GO_Biological_Process_2025	1
Testis_vs_Parenchyma	Both_downregulated	Regulation of Stress Fiber Assembly (GO:0051492)	'1/75	0.0759021	0.10962	0	0	13.4493	34.6765	STMN1	GO_Biological_Process_2025	1
Testis_vs_Parenchyma	Both_downregulated	Regulation of Rho Protein Signal Transduction (GO:0035023)	'1/76	0.0768761	0.10962	0	0	13.2693	34.0433	STMN1	GO_Biological_Process_2025	1
Testis_vs_Parenchyma	Both_downregulated	Negative Regulation of Supramolecular Fiber Organization (GO:1902904)	'1/76	0.0768761	0.10962	0	0	13.2693	34.0433	STMN1	GO_Biological_Process_2025	1
Testis_vs_Parenchyma	Both_downregulated	Proteolysis Involved in Protein Catabolic Process (GO:0051603)	'1/80	0.0807621	0.113712	0	0	12.5949	31.692	UBA52	GO_Biological_Process_2025	1
Testis_vs_Parenchyma	Both_downregulated	Regulation of Cytokinesis (GO:0032465)	'1/81	0.0817312	0.113712	0	0	12.4369	31.1459	CALM3	GO_Biological_Process_2025	1
Testis_vs_Parenchyma	Both_downregulated	Response to Insulin (GO:0032868)	'1/82	0.0826993	0.113712	0	0	12.2827	30.6152	VAMP2	GO_Biological_Process_2025	1
Testis_vs_Parenchyma	Both_downregulated	Regulation of Vesicle-Mediated Transport (GO:0060627)	'1/82	0.0826993	0.113712	0	0	12.2827	30.6152	VAMP2	GO_Biological_Process_2025	1
Testis_vs_Parenchyma	Both_downregulated	Macromolecule Modification (GO:0043412)	'1/84	0.0846326	0.114328	0	0	11.9855	29.5975	UBA52	GO_Biological_Process_2025	1
Testis_vs_Parenchyma	Both_downregulated	Cytoskeleton-Dependent Cytokinesis (GO:0061640)	'1/84	0.0846326	0.114328	0	0	11.9855	29.5975	STMN1	GO_Biological_Process_2025	1
Testis_vs_Parenchyma	Both_downregulated	Regulation of Cell Division (GO:0051302)	'1/85	0.0855978	0.114627	0	0	11.8423	29.1094	CALM3	GO_Biological_Process_2025	1
Testis_vs_Parenchyma	Both_downregulated	Mitotic Spindle Organization (GO:0007052)	'1/90	0.0904092	0.120026	0	0	11.1742	26.8561	STMN1	GO_Biological_Process_2025	1
Testis_vs_Parenchyma	Both_downregulated	Calcium-Mediated Signaling (GO:0019722)	'1/91	0.0913686	0.120263	0	0	11.0494	26.4397	CALM3	GO_Biological_Process_2025	1
Testis_vs_Parenchyma	Both_downregulated	Cellular Response to Peptide Hormone Stimulus (GO:0071375)	'1/94	0.0942409	0.122992	0	0	10.6914	25.252	VAMP2	GO_Biological_Process_2025	1
Testis_vs_Parenchyma	Both_downregulated	Response to Calcium Ion (GO:0051592)	'1/95	0.0951965	0.123195	0	0	10.5771	24.8754	CALM3	GO_Biological_Process_2025	1
Testis_vs_Parenchyma	Both_downregulated	Positive Regulation of Protein Modification Process (GO:0031401)	'1/98	0.0980573	0.12584	0	0	10.2485	23.799	SVIP	GO_Biological_Process_2025	1
Testis_vs_Parenchyma	Both_downregulated	Positive Regulation of Autophagy (GO:0010508)	'1/99	0.099009	0.126011	0	0	10.1434	23.457	SVIP	GO_Biological_Process_2025	1
Testis_vs_Parenchyma	Both_downregulated	Cytoplasmic Translation (GO:0002181)	'1/101	0.10091	0.127378	0	0	9.9395	22.7965	UBA52	GO_Biological_Process_2025	1
Testis_vs_Parenchyma	Both_downregulated	Cellular Response to Insulin Stimulus (GO:0032869)	'1/108	0.107531	0.134633	0	0	9.28598	20.7075	VAMP2	GO_Biological_Process_2025	1
Testis_vs_Parenchyma	Both_downregulated	Regulation of JNK Cascade (GO:0046328)	'1/115	0.114107	0.141713	0	0	8.71272	18.912	AIDA	GO_Biological_Process_2025	1
Testis_vs_Parenchyma	Both_downregulated	Protein-Containing Complex Organization (GO:0043933)	'1/123	0.121565	0.149768	0	0	8.13811	17.1495	VAMP2	GO_Biological_Process_2025	1
Testis_vs_Parenchyma	Both_downregulated	Plasma Membrane Bounded Cell Projection Organization (GO:0120036)	'1/141	0.138128	0.168823	0	0	7.08536	14.026	STMN1	GO_Biological_Process_2025	1
Testis_vs_Parenchyma	Both_downregulated	Regulation of Cell Cycle Process (GO:0010564)	'1/146	0.142676	0.173008	0	0	6.83931	13.3174	CALM3	GO_Biological_Process_2025	1
Testis_vs_Parenchyma	Both_downregulated	Neuron Development (GO:0048666)	'1/159	0.154393	0.185754	0	0	6.27247	11.7186	STMN1	GO_Biological_Process_2025	1
Testis_vs_Parenchyma	Both_downregulated	Nitrogen Compound Transport (GO:0071705)	'1/172	0.165958	0.197643	0	0	5.79181	10.4022	VAMP2	GO_Biological_Process_2025	1
Testis_vs_Parenchyma	Both_downregulated	Membrane Organization (GO:0061024)	'1/173	0.166842	0.197643	0	0	5.75785	10.3106	VAMP2	GO_Biological_Process_2025	1
Testis_vs_Parenchyma	Both_downregulated	Positive Regulation of Catabolic Process (GO:0009896)	'1/183	0.175626	0.206461	0	0	5.43874	9.46013	SVIP	GO_Biological_Process_2025	1
Testis_vs_Parenchyma	Both_downregulated	Macromolecule Biosynthetic Process (GO:0009059)	'1/189	0.180854	0.210997	0	0	5.26356	9.00103	UBA52	GO_Biological_Process_2025	1
Testis_vs_Parenchyma	Both_downregulated	Neuron Projection Development (GO:0031175)	'1/206	0.195497	0.226365	0	0	4.82293	7.87203	STMN1	GO_Biological_Process_2025	1
Testis_vs_Parenchyma	Both_downregulated	Modification-Dependent Protein Catabolic Process (GO:0019941)	'1/208	0.197203	0.226636	0	0	4.77585	7.75369	UBA52	GO_Biological_Process_2025	1
Testis_vs_Parenchyma	Both_downregulated	Regulation of Autophagy (GO:0010506)	'1/230	0.215745	0.246109	0	0	4.31223	6.61348	SVIP	GO_Biological_Process_2025	1
Testis_vs_Parenchyma	Both_downregulated	Translation (GO:0006412)	'1/232	0.21741	0.246185	0	0	4.27446	6.52269	UBA52	GO_Biological_Process_2025	1
Testis_vs_Parenchyma	Both_downregulated	Regulation of Inflammatory Response (GO:0050727)	'1/249	0.23143	0.260147	0	0	3.97802	5.82176	VAMP2	GO_Biological_Process_2025	1
Testis_vs_Parenchyma	Both_downregulated	Regulation of MAPK Cascade (GO:0043408)	'1/260	0.240373	0.268242	0	0	3.80695	5.42705	PEBP1	GO_Biological_Process_2025	1
Testis_vs_Parenchyma	Both_downregulated	Negative Regulation of Signal Transduction (GO:0009968)	'1/277	0.254	0.2794	0	0	3.56938	4.89156	YWHAB	GO_Biological_Process_2025	1
Testis_vs_Parenchyma	Both_downregulated	Cellular Component Assembly (GO:0022607)	'1/277	0.254	0.2794	0	0	3.56938	4.89156	VAMP2	GO_Biological_Process_2025	1
Testis_vs_Parenchyma	Both_downregulated	Cell Surface Receptor Protein Tyrosine Kinase Signaling Pathway (GO:0007169)	'1/296	0.268955	0.292528	0	0	3.33627	4.38123	STMN1	GO_Biological_Process_2025	1
Testis_vs_Parenchyma	Both_downregulated	Negative Regulation of Intracellular Signal Transduction (GO:1902532)	'1/297	0.269734	0.292528	0	0	3.32483	4.35659	PEBP1	GO_Biological_Process_2025	1
Testis_vs_Parenchyma	Both_downregulated	Positive Regulation of Transcription by RNA Polymerase II (GO:0045944)	'2/983	0.276289	0.297542	0	0	2.03852	2.62217	YWHAB;PTOV1	GO_Biological_Process_2025	2
Testis_vs_Parenchyma	Both_downregulated	Protein Transport (GO:0015031)	'1/308	0.278252	0.297575	0	0	3.20391	4.09853	VAMP2	GO_Biological_Process_2025	1
Testis_vs_Parenchyma	Both_downregulated	Protein Modification by Small Protein Conjugation (GO:0032446)	'1/316	0.284388	0.30204	0	0	3.12127	3.92473	UBA52	GO_Biological_Process_2025	1
Testis_vs_Parenchyma	Both_downregulated	Protein-Containing Complex Assembly (GO:0065003)	'1/323	0.289716	0.305591	0	0	3.05233	3.78139	VAMP2	GO_Biological_Process_2025	1
Testis_vs_Parenchyma	Both_downregulated	Supramolecular Fiber Organization (GO:0097435)	'1/339	0.301752	0.316122	0	0	2.90547	3.48119	STMN1	GO_Biological_Process_2025	1
Testis_vs_Parenchyma	Both_downregulated	Protein Ubiquitination (GO:0016567)	'1/369	0.323799	0.33616	0	0	2.66454	3.00462	UBA52	GO_Biological_Process_2025	1
Testis_vs_Parenchyma	Both_downregulated	Protein Localization (GO:0008104)	'1/371	0.325245	0.33616	0	0	2.64986	2.97626	YWHAB	GO_Biological_Process_2025	1
Testis_vs_Parenchyma	Both_downregulated	Gene Expression (GO:0010467)	'1/381	0.332431	0.341296	0	0	2.57882	2.84011	UBA52	GO_Biological_Process_2025	1
Testis_vs_Parenchyma	Both_downregulated	Positive Regulation of DNA-templated Transcription (GO:0045893)	'2/1274	0.390387	0.398143	0	0	1.54808	1.45615	YWHAB;PTOV1	GO_Biological_Process_2025	2
Testis_vs_Parenchyma	Both_downregulated	Protein Modification Process (GO:0036211)	'1/545	0.440373	0.446167	0	0	1.78631	1.46501	UBA52	GO_Biological_Process_2025	1
Testis_vs_Parenchyma	Both_downregulated	Protein Metabolic Process (GO:0019538)	'1/614	0.480628	0.483769	0	0	1.57961	1.15732	UBA52	GO_Biological_Process_2025	1
Testis_vs_Parenchyma	Both_downregulated	Regulation of Transcription by RNA Polymerase II (GO:0006357)	'2/2250	0.701441	0.701441	0	0	0.830258	0.294425	YWHAB;PTOV1	GO_Biological_Process_2025	2
Testis_vs_Parenchyma	Both_upregulated	Equilibrioception (GO:0050957)	'1/5	0.0087202	0.113815	0	0	146.772	696.01	PCDH15	GO_Biological_Process_2025	1
Testis_vs_Parenchyma	Both_upregulated	Behavioral Fear Response (GO:0001662)	'1/5	0.0087202	0.113815	0	0	146.772	696.01	GRM7	GO_Biological_Process_2025	1
Testis_vs_Parenchyma	Both_upregulated	Negative Regulation of Organic Acid Transport (GO:0032891)	'1/5	0.0087202	0.113815	0	0	146.772	696.01	GRM7	GO_Biological_Process_2025	1
Testis_vs_Parenchyma	Both_upregulated	Dendrite Arborization (GO:0140059)	'1/6	0.0104554	0.113815	0	0	117.412	535.473	PHACTR1	GO_Biological_Process_2025	1
Testis_vs_Parenchyma	Both_upregulated	Cellular Response to Caffeine (GO:0071313)	'1/6	0.0104554	0.113815	0	0	117.412	535.473	RYR1	GO_Biological_Process_2025	1
Testis_vs_Parenchyma	Both_upregulated	Release of Sequestered Calcium Ion Into Cytosol by Sarcoplasmic Reticulum (GO:0014808)	'1/6	0.0104554	0.113815	0	0	117.412	535.473	RYR1	GO_Biological_Process_2025	1
Testis_vs_Parenchyma	Both_upregulated	Response to Alkaloid (GO:0043279)	'1/6	0.0104554	0.113815	0	0	117.412	535.473	RYR1	GO_Biological_Process_2025	1
Testis_vs_Parenchyma	Both_upregulated	Response to Caffeine (GO:0031000)	'1/6	0.0104554	0.113815	0	0	117.412	535.473	RYR1	GO_Biological_Process_2025	1
Testis_vs_Parenchyma	Both_upregulated	Sensory Perception of Mechanical Stimulus (GO:0050954)	'2/92	0.0112843	0.113815	0	0	13.3838	60.0177	GRM7;PCDH15	GO_Biological_Process_2025	2
Testis_vs_Parenchyma	Both_upregulated	Neuron Projection Arborization (GO:0140058)	'1/7	0.0121876	0.113815	0	0	97.8382	431.206	PHACTR1	GO_Biological_Process_2025	1
Testis_vs_Parenchyma	Both_upregulated	Sensory Perception of Sound (GO:0007605)	'2/96	0.012239	0.113815	0	0	12.8117	56.4117	GRM7;PCDH15	GO_Biological_Process_2025	2
Testis_vs_Parenchyma	Both_upregulated	Collagen-Activated Signaling Pathway (GO:0038065)	'1/8	0.0139168	0.113815	0	0	83.8571	358.46	UBASH3B	GO_Biological_Process_2025	1
Testis_vs_Parenchyma	Both_upregulated	Amino Sugar Metabolic Process (GO:0006040)	'1/8	0.0139168	0.113815	0	0	83.8571	358.46	ST6GAL1	GO_Biological_Process_2025	1
Testis_vs_Parenchyma	Both_upregulated	Regulation of Myeloid Leukocyte Differentiation (GO:0002761)	'1/8	0.0139168	0.113815	0	0	83.8571	358.46	UBASH3B	GO_Biological_Process_2025	1
Testis_vs_Parenchyma	Both_upregulated	Pyrimidine Nucleotide-Sugar Transmembrane Transport (GO:0090481)	'1/8	0.0139168	0.113815	0	0	83.8571	358.46	TMEM241	GO_Biological_Process_2025	1
Testis_vs_Parenchyma	Both_upregulated	Release of Sequestered Calcium Ion Into Cytosol by Endoplasmic Reticulum (GO:1903514)	'1/8	0.0139168	0.113815	0	0	83.8571	358.46	RYR1	GO_Biological_Process_2025	1
Testis_vs_Parenchyma	Both_upregulated	Cellular Response to Purine-Containing Compound (GO:0071415)	'1/8	0.0139168	0.113815	0	0	83.8571	358.46	RYR1	GO_Biological_Process_2025	1
Testis_vs_Parenchyma	Both_upregulated	Sialylation (GO:0097503)	'1/9	0.0156432	0.113815	0	0	73.3713	305.057	ST6GAL1	GO_Biological_Process_2025	1
Testis_vs_Parenchyma	Both_upregulated	Negative Regulation of Bone Resorption (GO:0045779)	'1/9	0.0156432	0.113815	0	0	73.3713	305.057	UBASH3B	GO_Biological_Process_2025	1
Testis_vs_Parenchyma	Both_upregulated	Sarcoplasmic Reticulum Calcium Ion Transport (GO:0070296)	'1/10	0.0173666	0.113815	0	0	65.2157	264.333	RYR1	GO_Biological_Process_2025	1
Testis_vs_Parenchyma	Both_upregulated	Positive Regulation of Cell Morphogenesis (GO:0010770)	'1/10	0.0173666	0.113815	0	0	65.2157	264.333	CUX2	GO_Biological_Process_2025	1
Testis_vs_Parenchyma	Both_upregulated	N-acetylneuraminate Metabolic Process (GO:0006054)	'1/10	0.0173666	0.113815	0	0	65.2157	264.333	ST6GAL1	GO_Biological_Process_2025	1
Testis_vs_Parenchyma	Both_upregulated	Positive Regulation of Dendritic Spine Morphogenesis (GO:0061003)	'1/10	0.0173666	0.113815	0	0	65.2157	264.333	CUX2	GO_Biological_Process_2025	1
Testis_vs_Parenchyma	Both_upregulated	Modulation of Chemical Synaptic Transmission (GO:0050804)	'2/117	0.0178018	0.113815	0	0	10.4611	42.1422	GRM7;DLGAP4	GO_Biological_Process_2025	2
Testis_vs_Parenchyma	Both_upregulated	Regulation of Sequestering of Calcium Ion (GO:0051282)	'1/11	0.019087	0.113815	0	0	58.6912	232.343	UBASH3B	GO_Biological_Process_2025	1
Testis_vs_Parenchyma	Both_upregulated	Skeletal Muscle Fiber Development (GO:0048741)	'1/11	0.019087	0.113815	0	0	58.6912	232.343	RYR1	GO_Biological_Process_2025	1
Testis_vs_Parenchyma	Both_upregulated	Negative Regulation of Bone Remodeling (GO:0046851)	'1/11	0.019087	0.113815	0	0	58.6912	232.343	UBASH3B	GO_Biological_Process_2025	1
Testis_vs_Parenchyma	Both_upregulated	Regulation of Short-Term Neuronal Synaptic Plasticity (GO:0048172)	'1/12	0.0208046	0.118128	0	0	53.3529	206.614	SHISA9	GO_Biological_Process_2025	1
Testis_vs_Parenchyma	Both_upregulated	Positive Regulation of Ras Protein Signal Transduction (GO:0046579)	'1/13	0.0225192	0.118128	0	0	48.9044	185.513	MMD2	GO_Biological_Process_2025	1
Testis_vs_Parenchyma	Both_upregulated	Negative Regulation of Bone Mineralization (GO:0030502)	'1/13	0.0225192	0.118128	0	0	48.9044	185.513	RFLNA	GO_Biological_Process_2025	1
Testis_vs_Parenchyma	Both_upregulated	Response to Interleukin-6 (GO:0070741)	'1/14	0.0242309	0.118128	0	0	45.1403	167.928	PTPRT	GO_Biological_Process_2025	1
Testis_vs_Parenchyma	Both_upregulated	Myotube Cell Development (GO:0014904)	'1/14	0.0242309	0.118128	0	0	45.1403	167.928	RYR1	GO_Biological_Process_2025	1
Testis_vs_Parenchyma	Both_upregulated	G Protein-Coupled Glutamate Receptor Signaling Pathway (GO:0007216)	'1/14	0.0242309	0.118128	0	0	45.1403	167.928	GRM7	GO_Biological_Process_2025	1
Testis_vs_Parenchyma	Both_upregulated	Negative Regulation of Chondrocyte Differentiation (GO:0032331)	'1/15	0.0259397	0.118128	0	0	41.9139	153.069	RFLNA	GO_Biological_Process_2025	1
Testis_vs_Parenchyma	Both_upregulated	Neuromuscular Process Controlling Balance (GO:0050885)	'1/15	0.0259397	0.118128	0	0	41.9139	153.069	PCDH15	GO_Biological_Process_2025	1
Testis_vs_Parenchyma	Both_upregulated	Cellular Response to Alkaloid (GO:0071312)	'1/16	0.0276455	0.118128	0	0	39.1176	140.365	RYR1	GO_Biological_Process_2025	1
Testis_vs_Parenchyma	Both_upregulated	Negative Regulation of Receptor Signaling Pathway via STAT (GO:1904893)	'1/17	0.0293485	0.118128	0	0	36.671	129.394	PTPRT	GO_Biological_Process_2025	1
Testis_vs_Parenchyma	Both_upregulated	Contractile Actin Filament Bundle Assembly (GO:0030038)	'1/17	0.0293485	0.118128	0	0	36.671	129.394	PHACTR1	GO_Biological_Process_2025	1
Testis_vs_Parenchyma	Both_upregulated	Positive Regulation of Dendrite Morphogenesis (GO:0050775)	'1/17	0.0293485	0.118128	0	0	36.671	129.394	CUX2	GO_Biological_Process_2025	1
Testis_vs_Parenchyma	Both_upregulated	Stress Fiber Assembly (GO:0043149)	'1/17	0.0293485	0.118128	0	0	36.671	129.394	PHACTR1	GO_Biological_Process_2025	1
Testis_vs_Parenchyma	Both_upregulated	Actin Filament Organization (GO:0007015)	'2/158	0.031121	0.122207	0	0	7.6958	26.7035	MYO5C;RFLNA	GO_Biological_Process_2025	2
Testis_vs_Parenchyma	Both_upregulated	Regulation of Receptor Signaling Pathway via STAT (GO:1904892)	'1/19	0.0327458	0.125525	0	0	32.5931	111.435	PTPRT	GO_Biological_Process_2025	1
Testis_vs_Parenchyma	Both_upregulated	Regulation of Cell Cycle G2/M Phase Transition (GO:1902749)	'1/20	0.0344401	0.127208	0	0	30.8762	104.007	KCNH5	GO_Biological_Process_2025	1
Testis_vs_Parenchyma	Both_upregulated	Peptidyl-Tyrosine Dephosphorylation (GO:0035335)	'1/22	0.03782	0.127208	0	0	27.9328	91.4775	PTPRT	GO_Biological_Process_2025	1
Testis_vs_Parenchyma	Both_upregulated	Negative Regulation of Cell Communication (GO:0010648)	'1/22	0.03782	0.127208	0	0	27.9328	91.4775	UBASH3B	GO_Biological_Process_2025	1
Testis_vs_Parenchyma	Both_upregulated	Negative Regulation of Cell Development (GO:0010721)	'1/22	0.03782	0.127208	0	0	27.9328	91.4775	RFLNA	GO_Biological_Process_2025	1
Testis_vs_Parenchyma	Both_upregulated	Metal Ion Transport (GO:0030001)	'2/180	0.039472	0.127208	0	0	6.73715	21.7756	RYR1;KCNH5	GO_Biological_Process_2025	2
Testis_vs_Parenchyma	Both_upregulated	Cellular Response to Interleukin-6 (GO:0071354)	'1/23	0.0395057	0.127208	0	0	26.6618	86.1524	PTPRT	GO_Biological_Process_2025	1
Testis_vs_Parenchyma	Both_upregulated	Positive Regulation of Dendritic Spine Development (GO:0060999)	'1/23	0.0395057	0.127208	0	0	26.6618	86.1524	CUX2	GO_Biological_Process_2025	1
Testis_vs_Parenchyma	Both_upregulated	Positive Regulation of Excitatory Postsynaptic Potential (GO:2000463)	'1/23	0.0395057	0.127208	0	0	26.6618	86.1524	CUX2	GO_Biological_Process_2025	1
Testis_vs_Parenchyma	Both_upregulated	Cardiac Muscle Cell Development (GO:0055013)	'1/25	0.0428684	0.132727	0	0	24.4375	76.9688	SORBS2	GO_Biological_Process_2025	1
Testis_vs_Parenchyma	Both_upregulated	Response to Purine-Containing Compound (GO:0014074)	'1/25	0.0428684	0.132727	0	0	24.4375	76.9688	RYR1	GO_Biological_Process_2025	1
Testis_vs_Parenchyma	Both_upregulated	Negative Regulation of Signaling (GO:0023057)	'1/28	0.0478911	0.141916	0	0	21.719	66.0001	UBASH3B	GO_Biological_Process_2025	1
Testis_vs_Parenchyma	Both_upregulated	Regulation of Calcium Ion Transmembrane Transport (GO:1903169)	'1/28	0.0478911	0.141916	0	0	21.719	66.0001	UBASH3B	GO_Biological_Process_2025	1
Testis_vs_Parenchyma	Both_upregulated	Regulation of Dendrite Morphogenesis (GO:0048814)	'1/29	0.0495596	0.141916	0	0	20.9422	62.9226	CUX2	GO_Biological_Process_2025	1
Testis_vs_Parenchyma	Both_upregulated	Neuron Projection Development (GO:0031175)	'2/206	0.0503043	0.141916	0	0	5.87077	17.5516	PTPRT;GRM7	GO_Biological_Process_2025	2
Testis_vs_Parenchyma	Both_upregulated	Regulation of Bone Resorption (GO:0045124)	'1/30	0.0512253	0.141916	0	0	20.2191	60.0814	UBASH3B	GO_Biological_Process_2025	1
Testis_vs_Parenchyma	Both_upregulated	Modulation of Excitatory Postsynaptic Potential (GO:0098815)	'1/31	0.0528881	0.141916	0	0	19.5441	57.4514	CUX2	GO_Biological_Process_2025	1
Testis_vs_Parenchyma	Both_upregulated	Regulation of Dendritic Spine Morphogenesis (GO:0061001)	'1/31	0.0528881	0.141916	0	0	19.5441	57.4514	CUX2	GO_Biological_Process_2025	1
Testis_vs_Parenchyma	Both_upregulated	Regulation of Neuron Migration (GO:2001222)	'1/31	0.0528881	0.141916	0	0	19.5441	57.4514	PHACTR1	GO_Biological_Process_2025	1
Testis_vs_Parenchyma	Both_upregulated	Actin Filament Bundle Organization (GO:0061572)	'1/34	0.0578597	0.142419	0	0	17.7647	50.6247	RFLNA	GO_Biological_Process_2025	1
Testis_vs_Parenchyma	Both_upregulated	Regulation of Ras Protein Signal Transduction (GO:0046578)	'1/34	0.0578597	0.142419	0	0	17.7647	50.6247	MMD2	GO_Biological_Process_2025	1
Testis_vs_Parenchyma	Both_upregulated	Regulation of Neuronal Synaptic Plasticity (GO:0048168)	'1/35	0.0595113	0.142419	0	0	17.2413	48.648	SHISA9	GO_Biological_Process_2025	1
Testis_vs_Parenchyma	Both_upregulated	Dendrite Morphogenesis (GO:0048813)	'1/35	0.0595113	0.142419	0	0	17.2413	48.648	PHACTR1	GO_Biological_Process_2025	1
Testis_vs_Parenchyma	Both_upregulated	Positive Regulation of Synapse Assembly (GO:0051965)	'1/35	0.0595113	0.142419	0	0	17.2413	48.648	CUX2	GO_Biological_Process_2025	1
Testis_vs_Parenchyma	Both_upregulated	Platelet Aggregation (GO:0070527)	'1/35	0.0595113	0.142419	0	0	17.2413	48.648	UBASH3B	GO_Biological_Process_2025	1
Testis_vs_Parenchyma	Both_upregulated	Regulation of Cytosolic Calcium Ion Concentration (GO:0051480)	'1/36	0.06116	0.142419	0	0	16.7479	46.798	RYR1	GO_Biological_Process_2025	1
Testis_vs_Parenchyma	Both_upregulated	Carboxylic Acid Metabolic Process (GO:0019752)	'1/36	0.06116	0.142419	0	0	16.7479	46.798	ST6GAL1	GO_Biological_Process_2025	1
Testis_vs_Parenchyma	Both_upregulated	Glutamate Receptor Signaling Pathway (GO:0007215)	'1/36	0.06116	0.142419	0	0	16.7479	46.798	GRM7	GO_Biological_Process_2025	1
Testis_vs_Parenchyma	Both_upregulated	Regulation of G2/M Transition of Mitotic Cell Cycle (GO:0010389)	'1/37	0.0628059	0.142419	0	0	16.2819	45.0634	KCNH5	GO_Biological_Process_2025	1
Testis_vs_Parenchyma	Both_upregulated	Protein N-linked Glycosylation via Asparagine (GO:0018279)	'1/37	0.0628059	0.142419	0	0	16.2819	45.0634	ST6GAL1	GO_Biological_Process_2025	1
Testis_vs_Parenchyma	Both_upregulated	O-glycan Processing (GO:0016266)	'1/38	0.064449	0.144115	0	0	15.841	43.4342	ST6GAL1	GO_Biological_Process_2025	1
Testis_vs_Parenchyma	Both_upregulated	Negative Regulation of Sequestering of Calcium Ion (GO:0051283)	'1/40	0.0677269	0.148003	0	0	15.0271	40.4572	RYR1	GO_Biological_Process_2025	1
Testis_vs_Parenchyma	Both_upregulated	Negative Regulation of Secretion by Cell (GO:1903531)	'1/41	0.0693617	0.148003	0	0	14.6507	39.0943	GRM7	GO_Biological_Process_2025	1
Testis_vs_Parenchyma	Both_upregulated	Skeletal Muscle Tissue Development (GO:0007519)	'1/42	0.0709936	0.148003	0	0	14.2927	37.8065	RYR1	GO_Biological_Process_2025	1
Testis_vs_Parenchyma	Both_upregulated	Notch Signaling Pathway (GO:0007219)	'1/42	0.0709936	0.148003	0	0	14.2927	37.8065	SORBS2	GO_Biological_Process_2025	1
Testis_vs_Parenchyma	Both_upregulated	Positive Regulation of Neuron Differentiation (GO:0045666)	'1/42	0.0709936	0.148003	0	0	14.2927	37.8065	MMD2	GO_Biological_Process_2025	1
Testis_vs_Parenchyma	Both_upregulated	Skeletal System Morphogenesis (GO:0048705)	'1/43	0.0726228	0.148003	0	0	13.9517	36.588	RFLNA	GO_Biological_Process_2025	1
Testis_vs_Parenchyma	Both_upregulated	Release of Sequestered Calcium Ion Into Cytosol (GO:0051209)	'1/43	0.0726228	0.148003	0	0	13.9517	36.588	RYR1	GO_Biological_Process_2025	1
Testis_vs_Parenchyma	Both_upregulated	Homotypic Cell-Cell Adhesion (GO:0034109)	'1/46	0.0774937	0.154031	0	0	13.0196	33.2984	UBASH3B	GO_Biological_Process_2025	1
Testis_vs_Parenchyma	Both_upregulated	Regulation of Osteoclast Differentiation (GO:0045670)	'1/46	0.0774937	0.154031	0	0	13.0196	33.2984	UBASH3B	GO_Biological_Process_2025	1
Testis_vs_Parenchyma	Both_upregulated	Regulation of Trans-Synaptic Signaling (GO:0099177)	'1/47	0.0791118	0.155329	0	0	12.7359	32.3097	DLGAP4	GO_Biological_Process_2025	1
Testis_vs_Parenchyma	Both_upregulated	Positive Regulation of Kinase Activity (GO:0033674)	'1/48	0.0807271	0.156591	0	0	12.4643	31.3687	MMD2	GO_Biological_Process_2025	1
Testis_vs_Parenchyma	Both_upregulated	Cognition (GO:0050890)	'1/50	0.0839496	0.158787	0	0	11.9544	29.6174	CUX2	GO_Biological_Process_2025	1
Testis_vs_Parenchyma	Both_upregulated	Negative Regulation of Signal Transduction (GO:0009968)	'2/277	0.084391	0.158787	0	0	4.33939	10.7283	PTPRT;UBASH3B	GO_Biological_Process_2025	2
Testis_vs_Parenchyma	Both_upregulated	Positive Regulation of Nervous System Development (GO:0051962)	'1/51	0.0855567	0.158787	0	0	11.7147	28.8015	CUX2	GO_Biological_Process_2025	1
Testis_vs_Parenchyma	Both_upregulated	Regulation of Synaptic Transmission, Glutamatergic (GO:0051966)	'1/52	0.0871611	0.158787	0	0	11.4844	28.022	GRM7	GO_Biological_Process_2025	1
Testis_vs_Parenchyma	Both_upregulated	Sensory Perception (GO:0007600)	'1/52	0.0871611	0.158787	0	0	11.4844	28.022	PCDH15	GO_Biological_Process_2025	1
Testis_vs_Parenchyma	Both_upregulated	Regulation of Release of Sequestered Calcium Ion Into Cytosol (GO:0051279)	'1/53	0.0887627	0.158787	0	0	11.263	27.2766	UBASH3B	GO_Biological_Process_2025	1
Testis_vs_Parenchyma	Both_upregulated	Positive Regulation of Small GTPase Mediated Signal Transduction (GO:0051057)	'1/53	0.0887627	0.158787	0	0	11.263	27.2766	MMD2	GO_Biological_Process_2025	1
Testis_vs_Parenchyma	Both_upregulated	Striated Muscle Contraction (GO:0006941)	'1/55	0.0919578	0.161241	0	0	10.8448	25.8802	RYR1	GO_Biological_Process_2025	1
Testis_vs_Parenchyma	Both_upregulated	Adenylate Cyclase-Inhibiting G Protein-Coupled Receptor Signaling Pathway (GO:0007193)	'1/56	0.0935512	0.161241	0	0	10.6471	25.2255	GRM7	GO_Biological_Process_2025	1
Testis_vs_Parenchyma	Both_upregulated	Cell Surface Receptor Protein Tyrosine Kinase Signaling Pathway (GO:0007169)	'2/296	0.0944531	0.161241	0	0	4.05504	9.56848	PTPRT;UBASH3B	GO_Biological_Process_2025	2
Testis_vs_Parenchyma	Both_upregulated	Negative Regulation of Response to Stimulus (GO:0048585)	'1/57	0.0951419	0.161241	0	0	10.4564	24.5975	UBASH3B	GO_Biological_Process_2025	1
Testis_vs_Parenchyma	Both_upregulated	Memory (GO:0007613)	'1/57	0.0951419	0.161241	0	0	10.4564	24.5975	CUX2	GO_Biological_Process_2025	1
Testis_vs_Parenchyma	Both_upregulated	Protein Homotetramerization (GO:0051289)	'1/59	0.0983153	0.161518	0	0	10.0948	23.4157	RYR1	GO_Biological_Process_2025	1
Testis_vs_Parenchyma	Both_upregulated	Homophilic Cell Adhesion via Plasma Membrane Adhesion Molecules (GO:0007156)	'1/59	0.0983153	0.161518	0	0	10.0948	23.4157	PTPRT	GO_Biological_Process_2025	1
Testis_vs_Parenchyma	Both_upregulated	Cellular Response to Calcium Ion (GO:0071277)	'1/59	0.0983153	0.161518	0	0	10.0948	23.4157	RYR1	GO_Biological_Process_2025	1
Testis_vs_Parenchyma	Both_upregulated	Negative Regulation of Protein Kinase Activity (GO:0006469)	'1/60	0.0998979	0.16246	0	0	9.92323	22.8592	PTPRT	GO_Biological_Process_2025	1
Testis_vs_Parenchyma	Both_upregulated	Regulation of Synapse Assembly (GO:0051963)	'1/64	0.106201	0.167632	0	0	9.29132	20.835	CUX2	GO_Biological_Process_2025	1
Testis_vs_Parenchyma	Both_upregulated	Positive Regulation of Neurogenesis (GO:0050769)	'1/64	0.106201	0.167632	0	0	9.29132	20.835	CUX2	GO_Biological_Process_2025	1
Testis_vs_Parenchyma	Both_upregulated	Protein N-linked Glycosylation (GO:0006487)	'1/64	0.106201	0.167632	0	0	9.29132	20.835	ST6GAL1	GO_Biological_Process_2025	1
Testis_vs_Parenchyma	Both_upregulated	Positive Regulation of Cell Junction Assembly (GO:1901890)	'1/65	0.107771	0.168457	0	0	9.14568	20.3743	CUX2	GO_Biological_Process_2025	1
Testis_vs_Parenchyma	Both_upregulated	Regulation of Cellular Localization (GO:0060341)	'1/67	0.110901	0.171683	0	0	8.86765	19.501	MMD2	GO_Biological_Process_2025	1
Testis_vs_Parenchyma	Both_upregulated	Skin Development (GO:0043588)	'1/69	0.114021	0.174831	0	0	8.60597	18.6868	RYR1	GO_Biological_Process_2025	1
Testis_vs_Parenchyma	Both_upregulated	Positive Regulation of Protein Transport (GO:0051222)	'1/73	0.120228	0.18261	0	0	8.12623	17.2143	FRMD4A	GO_Biological_Process_2025	1
Testis_vs_Parenchyma	Both_upregulated	Calcium Ion Transmembrane Import Into Cytosol (GO:0097553)	'1/74	0.121773	0.182743	0	0	8.0145	16.8753	RYR1	GO_Biological_Process_2025	1
Testis_vs_Parenchyma	Both_upregulated	Positive Regulation of Secretion by Cell (GO:1903532)	'1/75	0.123316	0.182743	0	0	7.9058	16.5469	FRMD4A	GO_Biological_Process_2025	1
Testis_vs_Parenchyma	Both_upregulated	Positive Regulation of Protein Secretion (GO:0050714)	'1/76	0.124856	0.182743	0	0	7.8	16.2287	FRMD4A	GO_Biological_Process_2025	1
Testis_vs_Parenchyma	Both_upregulated	Regulation of Neuron Differentiation (GO:0045664)	'1/76	0.124856	0.182743	0	0	7.8	16.2287	MMD2	GO_Biological_Process_2025	1
Testis_vs_Parenchyma	Both_upregulated	Protein Tetramerization (GO:0051262)	'1/83	0.135562	0.194871	0	0	7.13164	14.2513	RYR1	GO_Biological_Process_2025	1
Testis_vs_Parenchyma	Both_upregulated	Regulation of Protein Kinase Activity (GO:0045859)	'1/83	0.135562	0.194871	0	0	7.13164	14.2513	MMD2	GO_Biological_Process_2025	1
Testis_vs_Parenchyma	Both_upregulated	Macromolecule Modification (GO:0043412)	'1/84	0.137081	0.19531	0	0	7.04536	14.0004	ST6GAL1	GO_Biological_Process_2025	1
Testis_vs_Parenchyma	Both_upregulated	Actomyosin Structure Organization (GO:0031032)	'1/85	0.138598	0.195739	0	0	6.96113	13.7565	PHACTR1	GO_Biological_Process_2025	1
Testis_vs_Parenchyma	Both_upregulated	Positive Regulation of Protein Kinase Activity (GO:0045860)	'1/88	0.143132	0.198657	0	0	6.72008	13.0638	MMD2	GO_Biological_Process_2025	1
Testis_vs_Parenchyma	Both_upregulated	Regulation of Mitotic Cell Cycle Phase Transition (GO:1901990)	'1/88	0.143132	0.198657	0	0	6.72008	13.0638	KCNH5	GO_Biological_Process_2025	1
Testis_vs_Parenchyma	Both_upregulated	Protein Dephosphorylation (GO:0006470)	'1/90	0.146141	0.201101	0	0	6.56841	12.6322	PTPRT	GO_Biological_Process_2025	1
Testis_vs_Parenchyma	Both_upregulated	Protein O-linked Glycosylation (GO:0006493)	'1/91	0.147642	0.201444	0	0	6.4951	12.4249	ST6GAL1	GO_Biological_Process_2025	1
Testis_vs_Parenchyma	Both_upregulated	Response to Calcium Ion (GO:0051592)	'1/95	0.153621	0.20784	0	0	6.21746	11.647	RYR1	GO_Biological_Process_2025	1
Testis_vs_Parenchyma	Both_upregulated	Muscle Contraction (GO:0006936)	'1/97	0.156595	0.208362	0	0	6.08732	11.2865	RYR1	GO_Biological_Process_2025	1
Testis_vs_Parenchyma	Both_upregulated	Regulation of Protein Localization (GO:0032880)	'1/97	0.156595	0.208362	0	0	6.08732	11.2865	MMD2	GO_Biological_Process_2025	1
Testis_vs_Parenchyma	Both_upregulated	Positive Regulation of Neuron Projection Development (GO:0010976)	'1/99	0.159558	0.208853	0	0	5.96248	10.9432	CUX2	GO_Biological_Process_2025	1
Testis_vs_Parenchyma	Both_upregulated	Regulation of Protein Secretion (GO:0050708)	'1/99	0.159558	0.208853	0	0	5.96248	10.9432	FRMD4A	GO_Biological_Process_2025	1
Testis_vs_Parenchyma	Both_upregulated	Sensory Perception of Light Stimulus (GO:0050953)	'1/101	0.162512	0.211004	0	0	5.84265	10.6161	PCDH15	GO_Biological_Process_2025	1
Testis_vs_Parenchyma	Both_upregulated	Organic Anion Transport (GO:0015711)	'1/105	0.168389	0.216885	0	0	5.6168	10.0062	TMEM241	GO_Biological_Process_2025	1
Testis_vs_Parenchyma	Both_upregulated	Dephosphorylation (GO:0016311)	'1/107	0.171313	0.217176	0	0	5.51027	9.72157	PTPRT	GO_Biological_Process_2025	1
Testis_vs_Parenchyma	Both_upregulated	Axon Development (GO:0061564)	'1/107	0.171313	0.217176	0	0	5.51027	9.72157	GRM7	GO_Biological_Process_2025	1
Testis_vs_Parenchyma	Both_upregulated	Cellular Response to Metal Ion (GO:0071248)	'1/112	0.178578	0.224617	0	0	5.26073	9.06282	RYR1	GO_Biological_Process_2025	1
Testis_vs_Parenchyma	Both_upregulated	Positive Regulation of Cell Projection Organization (GO:0031346)	'1/115	0.182907	0.228279	0	0	5.12152	8.70031	CUX2	GO_Biological_Process_2025	1
Testis_vs_Parenchyma	Both_upregulated	Enzyme-Linked Receptor Protein Signaling Pathway (GO:0007167)	'1/121	0.191499	0.237165	0	0	4.86397	8.03951	PTPRT	GO_Biological_Process_2025	1
Testis_vs_Parenchyma	Both_upregulated	Calcium Ion Transport (GO:0006816)	'1/126	0.198593	0.243944	0	0	4.66824	7.5462	RYR1	GO_Biological_Process_2025	1
Testis_vs_Parenchyma	Both_upregulated	Potassium Ion Transport (GO:0006813)	'1/127	0.200004	0.243944	0	0	4.63095	7.45314	KCNH5	GO_Biological_Process_2025	1
Testis_vs_Parenchyma	Both_upregulated	Regulation of Cell Migration (GO:0030334)	'2/479	0.204221	0.247215	0	0	2.47608	3.93338	PTPRT;PHACTR1	GO_Biological_Process_2025	2
Testis_vs_Parenchyma	Both_upregulated	Potassium Ion Transmembrane Transport (GO:0071805)	'1/134	0.209816	0.252092	0	0	4.38567	6.84833	KCNH5	GO_Biological_Process_2025	1
Testis_vs_Parenchyma	Both_upregulated	Negative Regulation of Cell Motility (GO:2000146)	'1/139	0.216753	0.257966	0	0	4.2257	6.46109	PTPRT	GO_Biological_Process_2025	1
Testis_vs_Parenchyma	Both_upregulated	Intracellular Calcium Ion Homeostasis (GO:0006874)	'1/140	0.218133	0.257966	0	0	4.19509	6.38765	RYR1	GO_Biological_Process_2025	1
Testis_vs_Parenchyma	Both_upregulated	Plasma Membrane Bounded Cell Projection Organization (GO:0120036)	'1/141	0.219511	0.257966	0	0	4.16492	6.31548	PTPRT	GO_Biological_Process_2025	1
Testis_vs_Parenchyma	Both_upregulated	Protein Homooligomerization (GO:0051260)	'1/143	0.22226	0.259303	0	0	4.10584	6.17481	RYR1	GO_Biological_Process_2025	1
Testis_vs_Parenchyma	Both_upregulated	Neuron Development (GO:0048666)	'1/159	0.243914	0.282035	0	0	3.68708	5.20225	PTPRT	GO_Biological_Process_2025	1
Testis_vs_Parenchyma	Both_upregulated	Skeletal System Development (GO:0001501)	'1/160	0.245248	0.282035	0	0	3.66371	5.14929	RFLNA	GO_Biological_Process_2025	1
Testis_vs_Parenchyma	Both_upregulated	Positive Regulation of Protein Phosphorylation (GO:0001934)	'1/171	0.259769	0.294527	0	0	3.42474	4.61642	MMD2	GO_Biological_Process_2025	1
Testis_vs_Parenchyma	Both_upregulated	Cell-Cell Adhesion via Plasma-Membrane Adhesion Molecules (GO:0098742)	'1/171	0.259769	0.294527	0	0	3.42474	4.61642	PTPRT	GO_Biological_Process_2025	1
Testis_vs_Parenchyma	Both_upregulated	Negative Regulation of Cell Migration (GO:0030336)	'1/184	0.276581	0.311395	0	0	3.17936	4.08629	PTPRT	GO_Biological_Process_2025	1
Testis_vs_Parenchyma	Both_upregulated	Anterograde Trans-Synaptic Signaling (GO:0098916)	'1/189	0.282947	0.316351	0	0	3.09402	3.90619	GRM7	GO_Biological_Process_2025	1
Testis_vs_Parenchyma	Both_upregulated	Adenylate Cyclase-Modulating G Protein-Coupled Receptor Signaling Pathway (GO:0007188)	'1/202	0.299247	0.332268	0	0	2.89201	3.48917	GRM7	GO_Biological_Process_2025	1
Testis_vs_Parenchyma	Both_upregulated	Regulation of Signal Transduction (GO:0009966)	'1/211	0.310321	0.342203	0	0	2.76681	3.23758	UBASH3B	GO_Biological_Process_2025	1
Testis_vs_Parenchyma	Both_upregulated	Positive Regulation of Signal Transduction (GO:0009967)	'1/256	0.363186	0.397775	0	0	2.27336	2.30255	CUX2	GO_Biological_Process_2025	1
Testis_vs_Parenchyma	Both_upregulated	Chemical Synaptic Transmission (GO:0007268)	'1/260	0.36769	0.399987	0	0	2.23779	2.23895	GRM7	GO_Biological_Process_2025	1
Testis_vs_Parenchyma	Both_upregulated	Cellular Response to Cytokine Stimulus (GO:0071345)	'1/289	0.39943	0.431598	0	0	2.0095	1.84415	PTPRT	GO_Biological_Process_2025	1
Testis_vs_Parenchyma	Both_upregulated	Positive Regulation of Cell Differentiation (GO:0045597)	'1/297	0.407909	0.437823	0	0	1.95439	1.75252	MMD2	GO_Biological_Process_2025	1
Testis_vs_Parenchyma	Both_upregulated	Monoatomic Cation Transmembrane Transport (GO:0098655)	'1/304	0.415234	0.442733	0	0	1.90856	1.67746	KCNH5	GO_Biological_Process_2025	1
Testis_vs_Parenchyma	Both_upregulated	Inorganic Cation Transmembrane Transport (GO:0098662)	'1/307	0.418346	0.443116	0	0	1.88956	1.64665	KCNH5	GO_Biological_Process_2025	1
Testis_vs_Parenchyma	Both_upregulated	Supramolecular Fiber Organization (GO:0097435)	'1/339	0.450556	0.474114	0	0	1.70788	1.36165	MYO5C	GO_Biological_Process_2025	1
Testis_vs_Parenchyma	Both_upregulated	Positive Regulation of Macromolecule Biosynthetic Process (GO:0010557)	'1/355	0.466004	0.487186	0	0	1.62936	1.24412	CUX2	GO_Biological_Process_2025	1
Testis_vs_Parenchyma	Both_upregulated	Positive Regulation of Gene Expression (GO:0010628)	'1/436	0.537959	0.558783	0	0	1.32049	0.818666	CUX2	GO_Biological_Process_2025	1
Testis_vs_Parenchyma	Both_upregulated	Protein Modification Process (GO:0036211)	'1/545	0.620089	0.639964	0	0	1.05001	0.501792	PTPRT	GO_Biological_Process_2025	1
Testis_vs_Parenchyma	Both_upregulated	Negative Regulation of Transcription by RNA Polymerase II (GO:0000122)	'1/732	0.729141	0.747718	0	0	0.773879	0.244459	CUX2	GO_Biological_Process_2025	1
Testis_vs_Parenchyma	Both_upregulated	Negative Regulation of DNA-templated Transcription (GO:0045892)	'1/1006	0.836	0.851874	0	0	0.554873	0.0993924	CUX2	GO_Biological_Process_2025	1
Testis_vs_Parenchyma	Both_upregulated	Regulation of Gene Expression (GO:0010468)	'1/1127	0.868896	0.879826	0	0	0.492085	0.0691535	CUX2	GO_Biological_Process_2025	1
Testis_vs_Parenchyma	Both_upregulated	Regulation of DNA-templated Transcription (GO:0006355)	'1/2139	0.980983	0.984713	0	0	0.24524	0.00470872	CUX2	GO_Biological_Process_2025	1
Testis_vs_Parenchyma	Both_upregulated	Regulation of Transcription by RNA Polymerase II (GO:0006357)	'1/2250	0.984713	0.984713	0	0	0.231685	0.00356902	CUX2	GO_Biological_Process_2025	1
Testis_vs_Parenchyma	Upregulated_in_COVID19_downregulated_in_Influenza	Neurotransmitter-Gated Ion Channel Clustering (GO:0072578)	'1/7	0.000699877	0.0137685	0	0	3332	24205.7	LHFPL3	GO_Biological_Process_2025	1
Testis_vs_Parenchyma	Upregulated_in_COVID19_downregulated_in_Influenza	Peptidyl-Tyrosine Autophosphorylation (GO:0038083)	'1/12	0.00119964	0.0137685	0	0	1817	12220.7	ALK	GO_Biological_Process_2025	1
Testis_vs_Parenchyma	Upregulated_in_COVID19_downregulated_in_Influenza	Postsynaptic Membrane Organization (GO:0001941)	'1/16	0.00159937	0.0137685	0	0	1332.2	8576.9	LHFPL3	GO_Biological_Process_2025	1
Testis_vs_Parenchyma	Upregulated_in_COVID19_downregulated_in_Influenza	Negative Regulation of Lipid Catabolic Process (GO:0050995)	'1/19	0.00189911	0.0137685	0	0	1110	6955.67	ALK	GO_Biological_Process_2025	1
Testis_vs_Parenchyma	Upregulated_in_COVID19_downregulated_in_Influenza	Regulation of Lipid Catabolic Process (GO:0050994)	'1/26	0.00259833	0.0150703	0	0	798.92	4755.88	ALK	GO_Biological_Process_2025	1
Testis_vs_Parenchyma	Upregulated_in_COVID19_downregulated_in_Influenza	Negative Regulation of Lipid Metabolic Process (GO:0045833)	'1/33	0.00329731	0.015937	0	0	623.938	3565.58	ALK	GO_Biological_Process_2025	1
Testis_vs_Parenchyma	Upregulated_in_COVID19_downregulated_in_Influenza	Regulation of Dendrite Development (GO:0050773)	'1/43	0.00429542	0.0177953	0	0	475.143	2589.63	ALK	GO_Biological_Process_2025	1
Testis_vs_Parenchyma	Upregulated_in_COVID19_downregulated_in_Influenza	Peptidyl-Tyrosine Phosphorylation (GO:0018108)	'1/58	0.00579166	0.0205895	0	0	349.842	1802.15	ALK	GO_Biological_Process_2025	1
Testis_vs_Parenchyma	Upregulated_in_COVID19_downregulated_in_Influenza	Regulation of Synapse Assembly (GO:0051963)	'1/64	0.00638984	0.0205895	0	0	316.429	1598.93	LHFPL3	GO_Biological_Process_2025	1
Testis_vs_Parenchyma	Upregulated_in_COVID19_downregulated_in_Influenza	Regulation of Neuron Differentiation (GO:0045664)	'1/76	0.00758566	0.0216932	0	0	265.64	1296.72	ALK	GO_Biological_Process_2025	1
Testis_vs_Parenchyma	Upregulated_in_COVID19_downregulated_in_Influenza	Sensory Perception of Mechanical Stimulus (GO:0050954)	'1/92	0.00917897	0.0216932	0	0	218.758	1026.16	LHFPL3	GO_Biological_Process_2025	1
Testis_vs_Parenchyma	Upregulated_in_COVID19_downregulated_in_Influenza	Sensory Perception of Sound (GO:0007605)	'1/96	0.0095771	0.0216932	0	0	209.505	973.86	LHFPL3	GO_Biological_Process_2025	1
Testis_vs_Parenchyma	Upregulated_in_COVID19_downregulated_in_Influenza	Positive Regulation of Neuron Projection Development (GO:0010976)	'1/99	0.00987564	0.0216932	0	0	203.061	937.673	ALK	GO_Biological_Process_2025	1
Testis_vs_Parenchyma	Upregulated_in_COVID19_downregulated_in_Influenza	Positive Regulation of NF-kappaB Transcription Factor Activity (GO:0051092)	'1/105	0.0104726	0.0216932	0	0	191.288	872.083	ALK	GO_Biological_Process_2025	1
Testis_vs_Parenchyma	Upregulated_in_COVID19_downregulated_in_Influenza	Negative Regulation of Catabolic Process (GO:0009895)	'1/120	0.0119642	0.0218652	0	0	167.05	739.338	ALK	GO_Biological_Process_2025	1
Testis_vs_Parenchyma	Upregulated_in_COVID19_downregulated_in_Influenza	Enzyme-Linked Receptor Protein Signaling Pathway (GO:0007167)	'1/121	0.0120636	0.0218652	0	0	165.65	731.769	ALK	GO_Biological_Process_2025	1
Testis_vs_Parenchyma	Upregulated_in_COVID19_downregulated_in_Influenza	Protein Autophosphorylation (GO:0046777)	'1/140	0.0139512	0.0237991	0	0	142.871	610.37	ALK	GO_Biological_Process_2025	1
Testis_vs_Parenchyma	Upregulated_in_COVID19_downregulated_in_Influenza	Phosphate-Containing Compound Metabolic Process (GO:0006796)	'1/150	0.014944	0.0240764	0	0	133.215	559.961	ALK	GO_Biological_Process_2025	1
Testis_vs_Parenchyma	Upregulated_in_COVID19_downregulated_in_Influenza	Neuron Development (GO:0048666)	'1/159	0.0158371	0.0241724	0	0	125.57	520.537	ALK	GO_Biological_Process_2025	1
Testis_vs_Parenchyma	Upregulated_in_COVID19_downregulated_in_Influenza	Positive Regulation of DNA-binding Transcription Factor Activity (GO:0051091)	'1/174	0.0173246	0.0248826	0	0	114.595	464.756	ALK	GO_Biological_Process_2025	1
Testis_vs_Parenchyma	Upregulated_in_COVID19_downregulated_in_Influenza	Neuron Differentiation (GO:0030182)	'1/181	0.0180184	0.0248826	0	0	110.1	442.201	ALK	GO_Biological_Process_2025	1
Testis_vs_Parenchyma	Upregulated_in_COVID19_downregulated_in_Influenza	Regulation of Programmed Cell Death (GO:0043067)	'1/195	0.0194053	0.0252166	0	0	102.082	402.431	ALK	GO_Biological_Process_2025	1
Testis_vs_Parenchyma	Upregulated_in_COVID19_downregulated_in_Influenza	Regulation of Cell Differentiation (GO:0045595)	'1/201	0.0199993	0.0252166	0	0	98.99	387.254	ALK	GO_Biological_Process_2025	1
Testis_vs_Parenchyma	Upregulated_in_COVID19_downregulated_in_Influenza	Positive Regulation of Developmental Process (GO:0051094)	'1/245	0.0243504	0.0294234	0	0	80.959	300.78	ALK	GO_Biological_Process_2025	1
Testis_vs_Parenchyma	Upregulated_in_COVID19_downregulated_in_Influenza	Cell Surface Receptor Protein Tyrosine Kinase Signaling Pathway (GO:0007169)	'1/296	0.0293815	0.0329915	0	0	66.7898	235.594	ALK	GO_Biological_Process_2025	1
Testis_vs_Parenchyma	Upregulated_in_COVID19_downregulated_in_Influenza	Phosphorylation (GO:0016310)	'1/298	0.0295785	0.0329915	0	0	66.3333	233.54	ALK	GO_Biological_Process_2025	1
Testis_vs_Parenchyma	Upregulated_in_COVID19_downregulated_in_Influenza	Protein Phosphorylation (GO:0006468)	'1/373	0.0369529	0.0396901	0	0	52.7581	174.002	ALK	GO_Biological_Process_2025	1
Testis_vs_Parenchyma	Upregulated_in_COVID19_downregulated_in_Influenza	Regulation of Apoptotic Process (GO:0042981)	'1/704	0.0691624	0.0716325	0	0	27.4467	73.3182	ALK	GO_Biological_Process_2025	1
Testis_vs_Parenchyma	Upregulated_in_COVID19_downregulated_in_Influenza	Regulation of Cell Population Proliferation (GO:0042127)	'1/769	0.0754232	0.0754232	0	0	25.0391	64.717	ALK	GO_Biological_Process_2025	1
