# Supplementary material for: SARS-CoV-2 infection reduces the number of spermatogonial stem cells and dysregulates the transcriptional landscape of the human testis
Source: Research Square preprint supplement (doi:10.21203/rs.3.rs-9371895/v1), 2026-04-21
Supplement: Supplementary file 10 [file 804f1673f7a5eaa3ceaa4ae1.xlsx]

## Sheet: Sheet 1
p_val	avg_log2FC	pct.1	pct.2	p_val_adj	cluster	gene
0	2.67931	0.992	0.427	0	Sertoli cells	SYNE2
0	2.09549	0.887	0.515	0	Sertoli cells	ERBB4
0	2.09115	0.949	0.235	0	Sertoli cells	SYNE1
0	1.82262	0.828	0.279	0	Sertoli cells	GPC5
0	1.56688	0.725	0.112	0	Sertoli cells	DCAF8L2
0	1.5523	0.815	0.3	0	Sertoli cells	DPP6
0	1.54785	0.88	0.328	0	Sertoli cells	DIAPH2
0	1.53023	0.738	0.256	0	Sertoli cells	MIR924HG
0	1.47183	0.802	0.205	0	Sertoli cells	CACNB4
0	1.45992	0.796	0.281	0	Sertoli cells	ARL15
0	1.44799	0.856	0.163	0	Sertoli cells	WNK3
0	1.44604	0.897	0.235	0	Sertoli cells	KIAA1217
0	1.4339	0.781	0.398	0	Sertoli cells	CTNNA2
0	1.43378	0.884	0.342	0	Sertoli cells	ATF7IP2
0	1.42945	0.965	0.488	0	Sertoli cells	MACF1
0	1.42833	0.909	0.341	0	Sertoli cells	ANKRD36C
0	1.41662	0.787	0.276	0	Sertoli cells	CADM1
0	1.41654	0.803	0.244	0	Sertoli cells	CARMIL1
0	1.39007	0.773	0.086	0	Sertoli cells	SCN9A
0	1.34536	0.918	0.614	0	Sertoli cells	CCSER1
0	1.33608	0.77	0.139	0	Sertoli cells	TNIK
0	1.31568	0.845	0.267	0	Sertoli cells	LINC00342
0	1.29978	0.883	0.429	0	Sertoli cells	BBX
0	1.29141	0.758	0.22	0	Sertoli cells	ZNF385B
0	1.27524	0.686	0.087	0	Sertoli cells	PAK3
0	1.24757	0.591	0.165	0	Sertoli cells	MIR202HG
0	1.22428	0.815	0.296	0	Sertoli cells	L3MBTL4
0	1.19865	0.731	0.091	0	Sertoli cells	WIPF3
0	1.19364	0.903	0.525	0	Sertoli cells	AL365295.1
0	1.18231	0.741	0.168	0	Sertoli cells	MAP1B
0	1.17878	0.845	0.31	0	Sertoli cells	ARHGAP26
0	1.1683	0.587	0.13	0	Sertoli cells	AL355612.1
0	1.15648	0.77	0.269	0	Sertoli cells	PLXDC2
0	1.15251	0.697	0.046	0	Sertoli cells	KEL
0	1.14844	0.814	0.216	0	Sertoli cells	AP3B1
0	1.14093	0.702	0.068	0	Sertoli cells	DANT2
0	1.12855	0.821	0.234	0	Sertoli cells	AKAP12
0	1.12808	0.784	0.145	0	Sertoli cells	KIF5C
0	1.11715	0.732	0.212	0	Sertoli cells	BOD1L1
0	1.1036	0.806	0.329	0	Sertoli cells	PRKD1
0	1.10322	0.57	0.06	0	Sertoli cells	ZNF117
0	1.09922	0.661	0.113	0	Sertoli cells	TOX
0	1.09845	0.847	0.43	0	Sertoli cells	ADK
0	1.09739	0.763	0.154	0	Sertoli cells	FAM153CP
0	1.08942	0.73	0.107	0	Sertoli cells	ABCA8
0	1.08012	0.801	0.238	0	Sertoli cells	MSI2
0	1.0786	0.901	0.67	0	Sertoli cells	FHIT
0	1.07015	0.674	0.13	0	Sertoli cells	SAMD12
0	1.06403	0.474	0.084	0	Sertoli cells	CMYA5
0	1.05779	0.742	0.134	0	Sertoli cells	ARAP2
0	1.05756	0.909	0.62	0	Sertoli cells	ZBTB20
0	1.0519	0.691	0.088	0	Sertoli cells	LAMA1
0	1.04848	0.807	0.417	0	Sertoli cells	NCOA2
0	1.04259	0.604	0.146	0	Sertoli cells	CPNE4
0	1.02727	0.624	0.068	0	Sertoli cells	SGIP1
0	1.02279	0.698	0.195	0	Sertoli cells	ASTN2
0	1.0226	0.751	0.221	0	Sertoli cells	TRPM3
0	1.00043	0.749	0.177	0	Sertoli cells	DOCK5
0	0.998413	0.695	0.164	0	Sertoli cells	MAML2
0	0.991143	0.583	0.058	0	Sertoli cells	SAMD5
0	0.991075	0.71	0.143	0	Sertoli cells	ARHGEF10
0	0.984252	0.689	0.19	0	Sertoli cells	DTNA
0	0.979506	0.73	0.161	0	Sertoli cells	UBR4
0	0.978351	0.784	0.409	0	Sertoli cells	DLGAP1
0	0.974543	0.697	0.196	0	Sertoli cells	CAMK2D
0	0.972182	0.769	0.231	0	Sertoli cells	MYO6
0	0.968553	0.817	0.421	0	Sertoli cells	ITFG1
0	0.962786	0.647	0.094	0	Sertoli cells	REEP1
0	0.962406	0.604	0.063	0	Sertoli cells	MTCP1
0	0.956098	0.696	0.153	0	Sertoli cells	ATP11A
0	0.954485	0.744	0.206	0	Sertoli cells	UTY
0	0.951505	0.731	0.219	0	Sertoli cells	KIAA1958
0	0.945973	0.687	0.1	0	Sertoli cells	MAMLD1
0	0.944551	0.733	0.242	0	Sertoli cells	ATXN1
0	0.942251	0.832	0.431	0	Sertoli cells	TANC2
0	0.941669	0.659	0.093	0	Sertoli cells	PPFIBP1
0	0.938455	0.415	0.308	0	Sertoli cells	CSMD1
0	0.937263	0.764	0.215	0	Sertoli cells	RUFY3
0	0.936853	0.747	0.39	0	Sertoli cells	NCAM2
0	0.931815	0.707	0.152	0	Sertoli cells	SMARCA1
0	0.926987	0.738	0.229	0	Sertoli cells	ANKS1A
0	0.926596	0.832	0.369	0	Sertoli cells	TJP1
0	0.922818	0.614	0.076	0	Sertoli cells	ZNF536
0	0.922332	0.809	0.317	0	Sertoli cells	MBD5
0	0.919578	0.642	0.147	0	Sertoli cells	ACSM3
0	0.917167	0.781	0.299	0	Sertoli cells	LUC7L3
0	0.915858	0.624	0.067	0	Sertoli cells	GALNT18
0	0.913615	0.703	0.286	0	Sertoli cells	JAZF1
0	0.913502	0.562	0.064	0	Sertoli cells	AL050309.1
0	0.910824	0.798	0.45	0	Sertoli cells	QKI
0	0.904829	0.757	0.246	0	Sertoli cells	DENND4A
0	0.899409	0.751	0.258	0	Sertoli cells	FGD4
0	0.894968	0.741	0.221	0	Sertoli cells	GSE1
0	0.892775	0.71	0.161	0	Sertoli cells	ZMYND8
0	0.892353	0.562	0.068	0	Sertoli cells	AC002377.1
0	0.89201	0.673	0.203	0	Sertoli cells	CDH2
0	0.88932	0.663	0.2	0	Sertoli cells	MAML3
0	0.888314	0.692	0.234	0	Sertoli cells	SPOCK1
0	0.888034	0.638	0.102	0	Sertoli cells	SLC4A5
0	0.876378	0.69	0.147	0	Sertoli cells	SVIL
0	0.873686	0.572	0.058	0	Sertoli cells	KLHL4
0	0.87179	0.513	0.099	0	Sertoli cells	SLC7A14-AS1
0	0.864332	0.635	0.241	0	Sertoli cells	SLC25A21
0	0.863033	0.755	0.317	0	Sertoli cells	UBR3
0	0.862435	0.666	0.166	0	Sertoli cells	SERINC5
0	0.860106	0.716	0.193	0	Sertoli cells	PVT1
0	0.858075	0.758	0.277	0	Sertoli cells	HELZ
0	0.849556	0.526	0.067	0	Sertoli cells	SEPTIN14
0	0.847603	0.572	0.115	0	Sertoli cells	PRKCB
0	0.840573	0.65	0.222	0	Sertoli cells	KDM6A
0	0.835494	0.641	0.182	0	Sertoli cells	PIP5K1B
0	0.83018	0.613	0.093	0	Sertoli cells	RAB31
0	0.829145	0.646	0.152	0	Sertoli cells	APPL2
0	0.827504	0.585	0.093	0	Sertoli cells	IQSEC1
0	0.8238	0.664	0.171	0	Sertoli cells	ME1
0	0.823564	0.67	0.135	0	Sertoli cells	MICAL2
0	0.823396	0.66	0.184	0	Sertoli cells	EPB41L3
0	0.821702	0.645	0.143	0	Sertoli cells	DCBLD2
0	0.820863	0.665	0.189	0	Sertoli cells	ARHGEF3
0	0.818096	0.604	0.099	0	Sertoli cells	MTSS1
0	0.817744	0.648	0.141	0	Sertoli cells	BRWD3
0	0.802597	0.61	0.1	0	Sertoli cells	DISP1
0	0.800517	0.603	0.195	0	Sertoli cells	ITPR2
0	0.795962	0.501	0.081	0	Sertoli cells	AL033504.1
0	0.7917	0.889	0.495	0	Sertoli cells	KMT2C
0	0.786995	0.639	0.131	0	Sertoli cells	VCL
0	0.784278	0.663	0.171	0	Sertoli cells	USP9Y
0	0.783268	0.525	0.075	0	Sertoli cells	ZNF711
0	0.783027	0.657	0.186	0	Sertoli cells	MYO10
0	0.781998	0.676	0.176	0	Sertoli cells	FNBP1
0	0.774963	0.58	0.071	0	Sertoli cells	SEPTIN6
0	0.76981	0.597	0.129	0	Sertoli cells	SYNPO2
0	0.763852	0.516	0.088	0	Sertoli cells	TMEM163
0	0.760365	0.512	0.086	0	Sertoli cells	ZFYVE28
0	0.756319	0.59	0.09	0	Sertoli cells	GRB14
0	0.753179	0.692	0.247	0	Sertoli cells	PIK3C2A
0	0.750563	0.56	0.118	0	Sertoli cells	KIAA1211
0	0.742904	0.601	0.123	0	Sertoli cells	MBNL2
0	0.742019	0.732	0.326	0	Sertoli cells	EVI5
0	0.741255	0.792	0.411	0	Sertoli cells	PEAK1
0	0.737914	0.449	0.144	0	Sertoli cells	TTN
0	0.73366	0.529	0.076	0	Sertoli cells	EPHA4
0	0.733221	0.708	0.345	0	Sertoli cells	FAM155A
0	0.732605	0.661	0.241	0	Sertoli cells	LMBR1
0	0.731384	0.749	0.31	0	Sertoli cells	TRIO
0	0.724857	0.447	0.044	0	Sertoli cells	LINC01340
0	0.723036	0.548	0.119	0	Sertoli cells	NHS
0	0.722913	0.638	0.193	0	Sertoli cells	SMARCA2
0	0.719718	0.56	0.096	0	Sertoli cells	USP53
0	0.718853	0.549	0.141	0	Sertoli cells	KMT2A
0	0.717789	0.631	0.194	0	Sertoli cells	TMEM135
0	0.71728	0.495	0.057	0	Sertoli cells	NMNAT2
0	0.716781	0.478	0.028	0	Sertoli cells	RTL9
0	0.715908	0.507	0.073	0	Sertoli cells	SAT1
0	0.708971	0.614	0.166	0	Sertoli cells	OSBPL10
0	0.70703	0.52	0.138	0	Sertoli cells	ZBTB7C
0	0.706646	0.714	0.312	0	Sertoli cells	RPS6KC1
0	0.701952	0.541	0.084	0	Sertoli cells	MTCL1
0	0.701203	0.647	0.281	0	Sertoli cells	VTI1A
0	0.697097	0.617	0.178	0	Sertoli cells	MYO9B
0	0.695095	0.569	0.107	0	Sertoli cells	ARID5B
0	0.693247	0.595	0.152	0	Sertoli cells	MAP3K13
0	0.69212	0.775	0.399	0	Sertoli cells	BPTF
0	0.69084	0.618	0.163	0	Sertoli cells	PCSK5
0	0.689569	0.449	0.212	0	Sertoli cells	MTRNR2L12
0	0.686272	0.592	0.171	0	Sertoli cells	ZDHHC14
0	0.682729	0.521	0.077	0	Sertoli cells	SH3BGRL
0	0.681924	0.58	0.213	0	Sertoli cells	MAP7
0	0.680389	0.535	0.122	0	Sertoli cells	SHOC1
0	0.680227	0.495	0.074	0	Sertoli cells	AC119673.2
0	0.679629	0.526	0.157	0	Sertoli cells	UNC5C
0	0.678874	0.525	0.092	0	Sertoli cells	LGR4
0	0.678371	0.674	0.265	0	Sertoli cells	SND1
0	0.678047	0.743	0.341	0	Sertoli cells	PPP1R9A
0	0.672199	0.679	0.277	0	Sertoli cells	CBLB
0	0.671577	0.673	0.311	0	Sertoli cells	SON
0	0.670764	0.749	0.332	0	Sertoli cells	AFDN
0	0.669116	0.532	0.142	0	Sertoli cells	UNC80
0	0.667263	0.492	0.072	0	Sertoli cells	NOSTRIN
0	0.667172	0.495	0.045	0	Sertoli cells	WT1
0	0.666809	0.463	0.028	0	Sertoli cells	MYO7A
0	0.666589	0.613	0.176	0	Sertoli cells	CTNND1
0	0.664864	0.464	0.058	0	Sertoli cells	KCNK13
0	0.664135	0.531	0.102	0	Sertoli cells	PCSK6
0	0.660546	0.532	0.107	0	Sertoli cells	STARD13
0	0.660201	0.463	0.057	0	Sertoli cells	FAM133A
0	0.658987	0.544	0.101	0	Sertoli cells	PLEKHG1
0	0.658409	0.53	0.102	0	Sertoli cells	ACSL4
0	0.657573	0.632	0.207	0	Sertoli cells	TBL1X
0	0.655461	0.858	0.664	0	Sertoli cells	SRPK2
0	0.654534	0.724	0.305	0	Sertoli cells	HIBCH
0	0.654416	0.626	0.232	0	Sertoli cells	WSB1
0	0.653336	0.551	0.139	0	Sertoli cells	MTHFD1L
0	0.652246	0.478	0.084	0	Sertoli cells	FAM110B
0	0.6518	0.689	0.304	0	Sertoli cells	EPB41L2
0	0.649445	0.477	0.062	0	Sertoli cells	SHC4
0	0.648092	0.657	0.251	0	Sertoli cells	PTPN4
0	0.648001	0.533	0.106	0	Sertoli cells	KIF21A
0	0.645924	0.556	0.121	0	Sertoli cells	ZNF431
0	0.645761	0.536	0.121	0	Sertoli cells	PABPN1
0	0.640676	0.538	0.151	0	Sertoli cells	TSPAN5
0	0.639219	0.603	0.196	0	Sertoli cells	ATP2C1
0	0.637666	0.524	0.116	0	Sertoli cells	MAGED1
0	0.634955	0.534	0.11	0	Sertoli cells	TNS3
0	0.634262	0.674	0.295	0	Sertoli cells	ZRANB2
0	0.633485	0.479	0.07	0	Sertoli cells	SMOC1
0	0.631874	0.601	0.19	0	Sertoli cells	STARD9
0	0.630951	0.396	0.04	0	Sertoli cells	FSHR
0	0.629401	0.677	0.233	0	Sertoli cells	CALD1
0	0.629308	0.643	0.243	0	Sertoli cells	SMC6
0	0.629207	0.471	0.042	0	Sertoli cells	MAP3K21
0	0.625405	0.581	0.206	0	Sertoli cells	CERS6
0	0.623122	0.823	0.5	0	Sertoli cells	PTK2
0	0.622025	0.501	0.102	0	Sertoli cells	ATP2B4
0	0.621492	0.591	0.23	0	Sertoli cells	CACNA2D1
0	0.620312	0.72	0.333	0	Sertoli cells	IGF1R
0	0.619386	0.625	0.24	0	Sertoli cells	AFF4
0	0.616968	0.636	0.268	0	Sertoli cells	ZNF518A
0	0.615902	0.549	0.147	0	Sertoli cells	TRERF1
0	0.608866	0.518	0.156	0	Sertoli cells	CA8
0	0.608184	0.628	0.169	0	Sertoli cells	RHOBTB3
0	0.608058	0.589	0.179	0	Sertoli cells	SLF2
0	0.607977	0.629	0.222	0	Sertoli cells	DENND4C
0	0.605909	0.337	0.022	0	Sertoli cells	BTNL8
0	0.605751	0.451	0.064	0	Sertoli cells	CGNL1
0	0.603275	0.628	0.237	0	Sertoli cells	PPP2R3A
0	0.602008	0.453	0.064	0	Sertoli cells	SLAIN1
0	0.600061	0.564	0.173	0	Sertoli cells	ANKRD18A
0	0.599751	0.493	0.106	0	Sertoli cells	ZNF208
0	0.599126	0.467	0.06	0	Sertoli cells	ARHGAP18
0	0.597949	0.757	0.403	0	Sertoli cells	MAP4
0	0.59751	0.526	0.132	0	Sertoli cells	ELL2
0	0.592012	0.371	0.024	0	Sertoli cells	AC012078.2
0	0.590347	0.438	0.088	0	Sertoli cells	AC078845.1
0	0.588565	0.591	0.226	0	Sertoli cells	EXOC6
0	0.588245	0.475	0.091	0	Sertoli cells	PDK3
0	0.586438	0.762	0.413	0	Sertoli cells	NFIA
0	0.585283	0.484	0.084	0	Sertoli cells	GATA4
0	0.584043	0.63	0.283	0	Sertoli cells	ARGLU1
0	0.583987	0.682	0.324	0	Sertoli cells	OSBPL9
0	0.583942	0.489	0.185	0	Sertoli cells	MTRNR2L8
0	0.583331	0.368	0.04	0	Sertoli cells	JRKL-AS1
0	0.580709	0.475	0.083	0	Sertoli cells	ILDR2
0	0.580627	0.544	0.151	0	Sertoli cells	RBM47
0	0.578994	0.457	0.068	0	Sertoli cells	LRP8
0	0.578844	0.5	0.108	0	Sertoli cells	ITGAV
0	0.578617	0.683	0.313	0	Sertoli cells	CLASP1
0	0.578567	0.443	0.066	0	Sertoli cells	KIAA1210
0	0.57465	0.631	0.211	0	Sertoli cells	MAP3K5
0	0.573728	0.418	0.048	0	Sertoli cells	CHRM3-AS2
0	0.573043	0.515	0.114	0	Sertoli cells	TRAK1
0	0.572805	0.467	0.19	0	Sertoli cells	RYR2
0	0.572054	0.607	0.291	0	Sertoli cells	AKAP9
0	0.570636	0.378	0.041	0	Sertoli cells	MMD2
0	0.570054	0.525	0.134	0	Sertoli cells	FBXO21
0	0.567946	0.47	0.082	0	Sertoli cells	TAB3
0	0.566232	0.475	0.096	0	Sertoli cells	FLNB
0	0.563176	0.581	0.227	0	Sertoli cells	PTPN13
0	0.562139	0.62	0.261	0	Sertoli cells	ENAH
0	0.561253	0.755	0.438	0	Sertoli cells	NCOA1
0	0.558005	0.528	0.17	0	Sertoli cells	REPS1
0	0.557608	0.584	0.208	0	Sertoli cells	CNOT4
0	0.557479	0.461	0.123	0	Sertoli cells	RAPGEF5
0	0.556499	0.635	0.335	0	Sertoli cells	PRRC2C
0	0.55569	0.343	0.089	0	Sertoli cells	CADPS
0	0.553241	0.589	0.241	0	Sertoli cells	TAF3
0	0.553222	0.404	0.049	0	Sertoli cells	SPTLC3
0	0.551094	0.618	0.266	0	Sertoli cells	KAT6B
0	0.55092	0.628	0.332	0	Sertoli cells	KANK1
0	0.549201	0.528	0.21	0	Sertoli cells	MAN2A1
0	0.546519	0.464	0.121	0	Sertoli cells	EPHB1
0	0.546488	0.62	0.285	0	Sertoli cells	RALGAPA2
0	0.545599	0.382	0.048	0	Sertoli cells	UBASH3B
0	0.543107	0.526	0.178	0	Sertoli cells	JAM3
0	0.541605	0.735	0.402	0	Sertoli cells	FCHSD2
0	0.540103	0.707	0.352	0	Sertoli cells	FER
0	0.539359	0.574	0.246	0	Sertoli cells	VPS13C
0	0.539206	0.509	0.183	0	Sertoli cells	DAAM1
0	0.537802	0.393	0.052	0	Sertoli cells	MCF2
0	0.536969	0.372	0.067	0	Sertoli cells	ABTB2
0	0.536757	0.387	0.026	0	Sertoli cells	NXF3
0	0.536651	0.484	0.112	0	Sertoli cells	CLDN11
0	0.53182	0.605	0.252	0	Sertoli cells	FAM13A
0	0.531233	0.601	0.25	0	Sertoli cells	CASC4
0	0.530264	0.466	0.118	0	Sertoli cells	PLCH1
0	0.530173	0.486	0.135	0	Sertoli cells	GAS7
0	0.529246	0.422	0.074	0	Sertoli cells	ARNT2
0	0.529222	0.404	0.051	0	Sertoli cells	MTMR1
0	0.529071	0.418	0.082	0	Sertoli cells	RBM41
0	0.527686	0.364	0.013	0	Sertoli cells	TBX22
0	0.524316	0.447	0.117	0	Sertoli cells	TTC8
0	0.521788	0.381	0.038	0	Sertoli cells	MRO
0	0.520565	0.833	0.631	0	Sertoli cells	EXOC4
0	0.518721	0.617	0.271	0	Sertoli cells	TTC17
0	0.518548	0.499	0.186	0	Sertoli cells	CCDC146
0	0.518144	0.528	0.241	0	Sertoli cells	RNF111
0	0.515962	0.583	0.288	0	Sertoli cells	SUMF1
0	0.515336	0.599	0.235	0	Sertoli cells	TAOK3
0	0.51523	0.457	0.107	0	Sertoli cells	CNKSR3
0	0.51496	0.536	0.184	0	Sertoli cells	HTT
0	0.514209	0.416	0.116	0	Sertoli cells	SEMA3C
0	0.513543	0.49	0.134	0	Sertoli cells	SLC41A2
0	0.512614	0.444	0.127	0	Sertoli cells	FYN
0	0.512375	0.567	0.203	0	Sertoli cells	HUWE1
0	0.512246	0.471	0.097	0	Sertoli cells	PWWP3B
0	0.51086	0.47	0.141	0	Sertoli cells	ALG13
0	0.51026	0.566	0.24	0	Sertoli cells	GTF2I
0	0.509052	0.381	0.049	0	Sertoli cells	INTS6L
0	0.508787	0.436	0.084	0	Sertoli cells	USP13
0	0.507242	0.48	0.124	0	Sertoli cells	GNG2
0	0.506702	0.501	0.168	0	Sertoli cells	HLTF
0	0.505621	0.573	0.201	0	Sertoli cells	PRKCE
0	0.505055	0.485	0.136	0	Sertoli cells	PTPN14
0	0.503589	0.4	0.077	0	Sertoli cells	IL1R1
0	0.503459	0.727	0.4	0	Sertoli cells	BAZ2B
0	0.503458	0.663	0.364	0	Sertoli cells	PTPRM
0	0.503152	0.566	0.239	0	Sertoli cells	CLEC16A
0	0.503077	0.387	0.078	0	Sertoli cells	CHST9
0	0.502729	0.479	0.129	0	Sertoli cells	NOTCH2
0	0.500022	0.513	0.162	0	Sertoli cells	CRIM1
0	0.499298	0.631	0.292	0	Sertoli cells	WDFY3
0	0.49869	0.581	0.235	0	Sertoli cells	TAX1BP1
0	0.497913	0.473	0.112	0	Sertoli cells	ITGB8
0	0.494244	0.528	0.259	0	Sertoli cells	UTRN
0	0.493441	0.499	0.154	0	Sertoli cells	SORT1
0	0.493011	0.556	0.217	0	Sertoli cells	ZNF516
0	0.492832	0.37	0.033	0	Sertoli cells	CPNE5
0	0.492573	0.755	0.434	0	Sertoli cells	AKAP13
0	0.490823	0.711	0.391	0	Sertoli cells	RBM6
0	0.489134	0.391	0.092	0	Sertoli cells	SNRPN
0	0.488403	0.398	0.071	0	Sertoli cells	NAV1
0	0.488138	0.484	0.161	0	Sertoli cells	UST
0	0.487178	0.448	0.094	0	Sertoli cells	MERTK
0	0.487103	0.408	0.068	0	Sertoli cells	SLC25A27
0	0.486273	0.66	0.25	0	Sertoli cells	FTX
0	0.486006	0.677	0.362	0	Sertoli cells	HNRNPA2B1
0	0.484982	0.484	0.151	0	Sertoli cells	CTNNAL1
0	0.484239	0.629	0.381	0	Sertoli cells	NKTR
0	0.48391	0.374	0.185	0	Sertoli cells	AF279873.3
0	0.482782	0.387	0.123	0	Sertoli cells	PLCB4
0	0.48231	0.619	0.305	0	Sertoli cells	GNAQ
0	0.48158	0.468	0.134	0	Sertoli cells	B4GALT5
0	0.481037	0.327	0.09	0	Sertoli cells	LINC02147
0	0.481007	0.622	0.277	0	Sertoli cells	XPO1
0	0.480745	0.415	0.089	0	Sertoli cells	CLEC2D
0	0.480484	0.454	0.118	0	Sertoli cells	ZBTB38
0	0.480446	0.422	0.144	0	Sertoli cells	ADCY2
0	0.480258	0.378	0.06	0	Sertoli cells	JAM2
0	0.480155	0.533	0.219	0	Sertoli cells	SGMS1
0	0.479797	0.323	0.023	0	Sertoli cells	LINC02234
0	0.479325	0.534	0.222	0	Sertoli cells	CCDC18-AS1
0	0.47731	0.524	0.195	0	Sertoli cells	SUCO
0	0.475761	0.482	0.151	0	Sertoli cells	ECHDC2
0	0.475678	0.544	0.218	0	Sertoli cells	PSME4
0	0.47442	0.572	0.246	0	Sertoli cells	PHKB
0	0.47364	0.482	0.163	0	Sertoli cells	COL1A2
0	0.473547	0.349	0.054	0	Sertoli cells	LINC01182
0	0.472997	0.481	0.139	0	Sertoli cells	ATP9A
0	0.47295	0.51	0.16	0	Sertoli cells	TBC1D8
0	0.472469	0.368	0.086	0	Sertoli cells	ABCA1
0	0.472408	0.545	0.226	0	Sertoli cells	MON2
0	0.472344	0.418	0.138	0	Sertoli cells	IGF2R
0	0.472295	1	0.978	0	Sertoli cells	MALAT1
0	0.472277	0.571	0.237	0	Sertoli cells	RAB10
0	0.472173	0.539	0.255	0	Sertoli cells	GOLGB1
0	0.47162	0.442	0.13	0	Sertoli cells	TTC39C
0	0.471468	0.468	0.14	0	Sertoli cells	ABCD3
0	0.4709	0.716	0.409	0	Sertoli cells	MKLN1
0	0.470658	0.364	0.043	0	Sertoli cells	DUXAP8
0	0.469748	0.56	0.237	0	Sertoli cells	PTBP3
0	0.469561	0.535	0.193	0	Sertoli cells	VMP1
0	0.469498	0.526	0.217	0	Sertoli cells	HNRNPA3
0	0.469474	0.392	0.084	0	Sertoli cells	ISYNA1
0	0.469123	0.815	0.522	0	Sertoli cells	USP34
0	0.468737	0.377	0.058	0	Sertoli cells	HEG1
0	0.46846	0.464	0.132	0	Sertoli cells	NCOR2
0	0.468213	0.365	0.237	0	Sertoli cells	ADGRL3
0	0.467892	0.588	0.273	0	Sertoli cells	TLK1
0	0.467026	0.421	0.096	0	Sertoli cells	NCK2
0	0.466723	0.366	0.058	0	Sertoli cells	CAPN2
0	0.465136	0.358	0.075	0	Sertoli cells	ZMAT1
0	0.464973	0.415	0.09	0	Sertoli cells	SDK2
0	0.464939	0.442	0.113	0	Sertoli cells	MBD2
0	0.464343	0.47	0.137	0	Sertoli cells	JPX
0	0.462891	0.589	0.275	0	Sertoli cells	USP47
0	0.462035	0.378	0.071	0	Sertoli cells	MOB3B
0	0.461701	0.766	0.377	0	Sertoli cells	RORA
0	0.46083	0.596	0.236	0	Sertoli cells	FNDC3B
0	0.460424	0.365	0.046	0	Sertoli cells	AC004540.1
0	0.460113	0.396	0.111	0	Sertoli cells	THSD7A
0	0.459769	0.455	0.117	0	Sertoli cells	MARK4
0	0.458672	0.332	0.048	0	Sertoli cells	MIR34AHG
0	0.458411	0.472	0.161	0	Sertoli cells	SPTAN1
0	0.458393	0.505	0.144	0	Sertoli cells	PHACTR2
0	0.457669	0.265	0.02	0	Sertoli cells	ERV3-1
0	0.456981	0.393	0.069	0	Sertoli cells	JCAD
0	0.456156	0.387	0.076	0	Sertoli cells	NAALAD2
0	0.455958	0.45	0.128	0	Sertoli cells	SLC20A2
0	0.455012	0.442	0.12	0	Sertoli cells	LHFPL2
0	0.454259	0.576	0.266	0	Sertoli cells	SLCO3A1
0	0.454184	0.522	0.188	0	Sertoli cells	ATXN7L1
0	0.454121	0.43	0.132	0	Sertoli cells	SAFB2
0	0.453671	0.36	0.054	0	Sertoli cells	TAF7L
0	0.452899	0.456	0.135	0	Sertoli cells	CRTC3
0	0.452756	0.439	0.135	0	Sertoli cells	SCML1
0	0.451818	0.398	0.08	0	Sertoli cells	MTM1
0	0.451066	0.429	0.117	0	Sertoli cells	HOMER1
0	0.450583	0.379	0.123	0	Sertoli cells	CHODL
0	0.447508	0.61	0.277	0	Sertoli cells	MAP4K4
0	0.445794	0.388	0.07	0	Sertoli cells	CEMIP2
0	0.443932	0.567	0.252	0	Sertoli cells	APP
0	0.442855	0.653	0.346	0	Sertoli cells	N4BP2L2
0	0.442776	0.368	0.055	0	Sertoli cells	FRMPD1
0	0.44275	0.507	0.213	0	Sertoli cells	MTR
0	0.442152	0.576	0.284	0	Sertoli cells	PPP3CA
0	0.441923	0.58	0.276	0	Sertoli cells	NT5C2
0	0.441401	0.37	0.062	0	Sertoli cells	ARMCX4
0	0.440762	0.404	0.088	0	Sertoli cells	STK10
0	0.440756	0.474	0.159	0	Sertoli cells	TOM1L2
0	0.44003	0.391	0.082	0	Sertoli cells	DEFB119
0	0.439509	0.494	0.196	0	Sertoli cells	FNBP1L
0	0.439216	0.543	0.19	0	Sertoli cells	TACC1
0	0.438499	0.447	0.129	0	Sertoli cells	VEZT
0	0.437495	0.772	0.482	0	Sertoli cells	ZNF638
0	0.436999	0.357	0.087	0	Sertoli cells	LINC00511
0	0.436688	0.464	0.151	0	Sertoli cells	SLC25A36
0	0.436667	0.707	0.452	0	Sertoli cells	SNHG14
0	0.436461	0.409	0.104	0	Sertoli cells	MXI1
0	0.436244	0.504	0.222	0	Sertoli cells	MICAL3
0	0.436164	0.313	0.109	0	Sertoli cells	AC105402.3
0	0.435961	0.351	0.046	0	Sertoli cells	FAM122B
0	0.434144	0.314	0.027	0	Sertoli cells	RANBP3L
0	0.434095	0.502	0.212	0	Sertoli cells	SS18
0	0.433858	0.531	0.228	0	Sertoli cells	WDFY2
0	0.433781	0.429	0.118	0	Sertoli cells	DAP3
0	0.43248	0.565	0.263	0	Sertoli cells	ATRX
0	0.432357	0.45	0.137	0	Sertoli cells	GAB1
0	0.431063	0.576	0.268	0	Sertoli cells	UBE2H
0	0.430248	0.344	0.111	0	Sertoli cells	FHOD3
0	0.4294	0.407	0.104	0	Sertoli cells	HPRT1
0	0.429107	0.452	0.156	0	Sertoli cells	ANO6
0	0.42902	0.597	0.294	0	Sertoli cells	R3HDM2
0	0.428385	0.582	0.288	0	Sertoli cells	DMXL1
0	0.428169	0.419	0.112	0	Sertoli cells	MPZL1
0	0.427189	0.408	0.125	0	Sertoli cells	CDYL2
0	0.427079	0.471	0.206	0	Sertoli cells	ZFYVE16
0	0.426584	0.626	0.327	0	Sertoli cells	FAM13B
0	0.426443	0.416	0.108	0	Sertoli cells	PLSCR4
0	0.425951	0.394	0.092	0	Sertoli cells	GNG7
0	0.424993	0.363	0.056	0	Sertoli cells	NDRG4
0	0.424969	0.399	0.097	0	Sertoli cells	WHRN
0	0.423718	0.576	0.276	0	Sertoli cells	KIF1B
0	0.423358	0.359	0.067	0	Sertoli cells	BCAT1
0	0.423138	0.443	0.141	0	Sertoli cells	CNST
0	0.422957	0.63	0.316	0	Sertoli cells	ATXN2
0	0.421948	0.367	0.071	0	Sertoli cells	LINC01087
0	0.421882	0.476	0.232	0	Sertoli cells	ZFC3H1
0	0.421342	0.616	0.309	0	Sertoli cells	TAOK1
0	0.421163	0.3	0.049	0	Sertoli cells	SAMD12-AS1
0	0.420609	0.439	0.155	0	Sertoli cells	UBAP1
0	0.420279	0.564	0.267	0	Sertoli cells	FBXO34
0	0.419868	0.332	0.05	0	Sertoli cells	TOX2
0	0.417529	0.356	0.09	0	Sertoli cells	ZNF160
0	0.417403	0.567	0.304	0	Sertoli cells	HERC1
0	0.417365	0.5	0.222	0	Sertoli cells	OGA
0	0.416962	0.371	0.089	0	Sertoli cells	ITGA6
0	0.416433	0.495	0.187	0	Sertoli cells	TMEM181
0	0.416064	0.483	0.187	0	Sertoli cells	ELOVL5
0	0.415979	0.43	0.137	0	Sertoli cells	ZNF462
0	0.415221	0.635	0.361	0	Sertoli cells	PHIP
0	0.415032	0.737	0.455	0	Sertoli cells	BIRC6
0	0.413004	0.354	0.059	0	Sertoli cells	FAM122C
0	0.412932	0.425	0.138	0	Sertoli cells	CPE
0	0.412247	0.406	0.134	0	Sertoli cells	TPRG1
0	0.411587	0.407	0.159	0	Sertoli cells	EPB41L4A
0	0.409728	0.6	0.275	0	Sertoli cells	MBNL1
0	0.408926	0.461	0.169	0	Sertoli cells	ADAM17
0	0.408211	0.368	0.089	0	Sertoli cells	SLC45A4
0	0.408199	0.37	0.076	0	Sertoli cells	RIN3
0	0.406927	0.597	0.302	0	Sertoli cells	MRTFA
0	0.406814	0.591	0.289	0	Sertoli cells	ANKRD17
0	0.406793	0.446	0.164	0	Sertoli cells	ELF1
0	0.40645	0.612	0.346	0	Sertoli cells	RNF38
0	0.40632	0.279	0.041	0	Sertoli cells	ENPP2
0	0.405957	0.388	0.1	0	Sertoli cells	TTC37
0	0.404951	0.39	0.114	0	Sertoli cells	NINL
0	0.404342	0.312	0.046	0	Sertoli cells	LINC01630
0	0.403435	0.308	0.043	0	Sertoli cells	ZNF69
0	0.403308	0.34	0.068	0	Sertoli cells	AR
0	0.402839	0.594	0.36	0	Sertoli cells	R3HDM1
0	0.402648	0.436	0.179	0	Sertoli cells	PNN
0	0.402522	0.655	0.369	0	Sertoli cells	BRWD1
0	0.402341	0.769	0.51	0	Sertoli cells	UBE2E2
0	0.402228	0.443	0.177	0	Sertoli cells	RNF13
0	0.401443	0.462	0.197	0	Sertoli cells	MDN1
0	0.400496	0.378	0.1	0	Sertoli cells	RBBP7
0	0.400301	0.358	0.068	0	Sertoli cells	SOGA1
0	0.400242	0.377	0.103	0	Sertoli cells	RHOBTB1
0	0.399635	0.413	0.153	0	Sertoli cells	HIVEP1
0	0.399628	0.479	0.216	0	Sertoli cells	CEP192
0	0.399571	0.612	0.315	0	Sertoli cells	MARK3
0	0.398709	0.452	0.203	0	Sertoli cells	GLIS3
0	0.398059	0.537	0.248	0	Sertoli cells	DIP2B
0	0.397959	0.302	0.027	0	Sertoli cells	PPP1R14C
0	0.397815	0.52	0.244	0	Sertoli cells	TENT2
0	0.3976	0.371	0.115	0	Sertoli cells	BCL2
0	0.397439	0.385	0.117	0	Sertoli cells	C12orf75
0	0.397014	0.501	0.211	0	Sertoli cells	FOXO3
0	0.396871	0.314	0.05	0	Sertoli cells	FLVCR2
0	0.396427	0.751	0.453	0	Sertoli cells	PTPRG
0	0.396051	0.43	0.203	0	Sertoli cells	ATR
0	0.39566	0.622	0.235	0	Sertoli cells	ARHGAP10
0	0.39548	0.548	0.259	0	Sertoli cells	SFPQ
0	0.394314	0.506	0.208	0	Sertoli cells	BMPR1A
0	0.393663	0.739	0.494	0	Sertoli cells	CDC42BPA
0	0.393614	0.319	0.053	0	Sertoli cells	ANOS1
0	0.393263	0.391	0.118	0	Sertoli cells	PRKAR2B
0	0.392784	0.298	0.024	0	Sertoli cells	AC113370.1
0	0.392729	0.404	0.123	0	Sertoli cells	C2orf27A
0	0.392029	0.356	0.093	0	Sertoli cells	HDAC8
0	0.390895	0.595	0.314	0	Sertoli cells	ZNF292
0	0.390557	0.359	0.127	0	Sertoli cells	SLK
0	0.390329	0.535	0.209	0	Sertoli cells	KALRN
0	0.389094	0.631	0.349	0	Sertoli cells	WNK1
0	0.389085	0.472	0.225	0	Sertoli cells	TCF25
0	0.388863	0.421	0.155	0	Sertoli cells	SRGAP3
0	0.388576	0.474	0.184	0	Sertoli cells	STIM1
0	0.38799	0.503	0.215	0	Sertoli cells	USP9X
0	0.387475	0.532	0.272	0	Sertoli cells	SCAF11
0	0.387014	0.434	0.184	0	Sertoli cells	CAST
0	0.38646	0.43	0.165	0	Sertoli cells	PUM3
0	0.386385	0.483	0.208	0	Sertoli cells	INVS
0	0.386023	0.692	0.45	0	Sertoli cells	BTBD9
0	0.385854	0.575	0.302	0	Sertoli cells	XKR6
0	0.385788	0.333	0.076	0	Sertoli cells	KANTR
0	0.385753	0.288	0.049	0	Sertoli cells	MLXIPL
0	0.385679	0.315	0.045	0	Sertoli cells	PFKFB4
0	0.385484	0.29	0.03	0	Sertoli cells	IGSF9B
0	0.385444	0.541	0.271	0	Sertoli cells	PKN2
0	0.38521	0.415	0.146	0	Sertoli cells	ESCO1
0	0.385147	0.572	0.305	0	Sertoli cells	NBAS
0	0.384845	0.447	0.162	0	Sertoli cells	WWP1
0	0.384465	0.687	0.338	0	Sertoli cells	LPP
0	0.384443	0.626	0.381	0	Sertoli cells	PNISR
0	0.384337	0.311	0.046	0	Sertoli cells	CCDC68
0	0.382519	0.364	0.106	0	Sertoli cells	ARHGAP20
0	0.382117	0.47	0.19	0	Sertoli cells	APPBP2
0	0.382024	0.299	0.042	0	Sertoli cells	MTMR4
0	0.381787	0.396	0.123	0	Sertoli cells	IBTK
0	0.381066	0.312	0.048	0	Sertoli cells	TRMT9B
0	0.380872	0.287	0.026	0	Sertoli cells	AL592183.1
0	0.380851	0.52	0.298	0	Sertoli cells	VPS13D
0	0.379828	0.491	0.164	0	Sertoli cells	ZEB2
0	0.379253	0.318	0.062	0	Sertoli cells	SLC25A29
0	0.378622	0.503	0.211	0	Sertoli cells	CSNK1A1
0	0.378063	0.57	0.298	0	Sertoli cells	ARHGAP32
0	0.37804	0.723	0.508	0	Sertoli cells	NR6A1
0	0.377875	0.365	0.089	0	Sertoli cells	MBNL3
0	0.377226	0.298	0.088	0	Sertoli cells	MINDY4
0	0.377101	0.534	0.241	0	Sertoli cells	PDZD2
0	0.376972	0.402	0.152	0	Sertoli cells	TTC14
0	0.376618	0.629	0.364	0	Sertoli cells	CHD9
0	0.376422	0.432	0.172	0	Sertoli cells	SRSF5
0	0.375303	0.391	0.12	0	Sertoli cells	ITPRID2
0	0.375296	0.588	0.33	0	Sertoli cells	TNKS
0	0.371858	0.27	0.028	0	Sertoli cells	SH3TC2-DT
0	0.371225	0.311	0.071	0	Sertoli cells	PLXNC1
0	0.370808	0.437	0.229	0	Sertoli cells	PCLO
0	0.370573	0.505	0.257	0	Sertoli cells	DHX36
0	0.370277	0.378	0.117	0	Sertoli cells	SIN3B
0	0.369684	0.445	0.186	0	Sertoli cells	AC079142.1
0	0.369507	0.437	0.189	0	Sertoli cells	MPRIP
0	0.36909	0.377	0.115	0	Sertoli cells	HPS5
0	0.368961	0.297	0.04	0	Sertoli cells	TBC1D8B
0	0.368107	0.315	0.051	0	Sertoli cells	ABO
0	0.367633	0.301	0.135	0	Sertoli cells	KCTD8
0	0.367595	0.407	0.171	0	Sertoli cells	MARK1
0	0.3673	0.383	0.121	0	Sertoli cells	MAP3K1
0	0.365933	0.414	0.144	0	Sertoli cells	ITPR1
0	0.365195	0.33	0.075	0	Sertoli cells	SYTL4
0	0.364646	0.267	0.041	0	Sertoli cells	IL4R
0	0.362856	0.638	0.4	0	Sertoli cells	PAN3
0	0.362449	0.362	0.101	0	Sertoli cells	PREP
0	0.362358	0.61	0.367	0	Sertoli cells	HERC4
0	0.361829	0.321	0.068	0	Sertoli cells	PCED1B
0	0.36129	0.328	0.07	0	Sertoli cells	AP1S2
0	0.36098	0.314	0.062	0	Sertoli cells	FAM20A
0	0.360433	0.441	0.214	0	Sertoli cells	AC008014.1
0	0.360282	0.397	0.122	0	Sertoli cells	STK24
0	0.360122	0.4	0.186	0	Sertoli cells	DYNC1H1
0	0.359781	0.322	0.085	0	Sertoli cells	AC063944.1
0	0.35963	0.325	0.071	0	Sertoli cells	ACSS1
0	0.359529	0.355	0.103	0	Sertoli cells	ME3
0	0.359343	0.358	0.098	0	Sertoli cells	FBH1
0	0.358927	0.703	0.449	0	Sertoli cells	ZMYM2
0	0.358079	0.401	0.145	0	Sertoli cells	SECISBP2L
0	0.357559	0.267	0.024	0	Sertoli cells	GAB3
0	0.357441	0.452	0.145	0	Sertoli cells	SETBP1
0	0.356962	0.458	0.185	0	Sertoli cells	ABCC1
0	0.355792	0.332	0.077	0	Sertoli cells	ZNF676
0	0.354878	0.404	0.164	0	Sertoli cells	AC139493.2
0	0.35486	0.424	0.17	0	Sertoli cells	KATNBL1
0	0.354681	0.377	0.136	0	Sertoli cells	STAT3
0	0.354335	0.328	0.097	0	Sertoli cells	OPTN
0	0.354108	0.959	0.942	0	Sertoli cells	MT-CO1
0	0.354102	0.309	0.077	0	Sertoli cells	C9orf147
0	0.35399	0.379	0.133	0	Sertoli cells	INPP5A
0	0.353631	0.313	0.074	0	Sertoli cells	RNF8
0	0.353529	0.674	0.487	0	Sertoli cells	GOLGA4
0	0.35105	0.38	0.116	0	Sertoli cells	CFLAR
0	0.350554	0.303	0.05	0	Sertoli cells	MGST2
0	0.350469	0.583	0.335	0	Sertoli cells	BTRC
0	0.350148	0.88	0.762	0	Sertoli cells	PRKN
0	0.349823	0.415	0.189	0	Sertoli cells	PRPF4B
0	0.349487	0.362	0.113	0	Sertoli cells	SCP2
0	0.349209	0.636	0.367	0	Sertoli cells	DDX17
0	0.348893	0.276	0.037	0	Sertoli cells	MIR181A1HG
0	0.348864	0.35	0.094	0	Sertoli cells	CPPED1
0	0.348855	0.301	0.048	0	Sertoli cells	PDIA5
0	0.347862	0.359	0.136	0	Sertoli cells	SCD5
0	0.347224	0.515	0.277	0	Sertoli cells	KMT2E
0	0.346975	0.262	0.024	0	Sertoli cells	ADAM33
0	0.346123	0.277	0.061	0	Sertoli cells	PPCDC
0	0.345893	0.452	0.198	0	Sertoli cells	LRPPRC
0	0.34572	0.278	0.037	0	Sertoli cells	SYK
0	0.34534	0.373	0.128	0	Sertoli cells	DNAJC13
0	0.345224	0.281	0.038	0	Sertoli cells	FAM153B
0	0.344846	0.318	0.081	0	Sertoli cells	LRRC8D
0	0.344658	0.469	0.217	0	Sertoli cells	FAM214A
0	0.343778	0.554	0.294	0	Sertoli cells	ZMYM4
0	0.34371	0.306	0.059	0	Sertoli cells	SUSD1
0	0.343565	0.311	0.066	0	Sertoli cells	CDH23
0	0.34311	0.467	0.22	0	Sertoli cells	MPDZ
0	0.343099	0.286	0.067	0	Sertoli cells	NPIPB5
0	0.342921	0.338	0.121	0	Sertoli cells	GRIK2
0	0.342771	0.442	0.183	0	Sertoli cells	RGL1
0	0.342538	0.274	0.052	0	Sertoli cells	LINC00607
0	0.342429	0.845	0.67	0	Sertoli cells	ZFAND3
0	0.341757	0.322	0.076	0	Sertoli cells	NMT2
0	0.340981	0.404	0.175	0	Sertoli cells	UNC13B
0	0.339582	0.289	0.047	0	Sertoli cells	TEC
0	0.33957	0.468	0.218	0	Sertoli cells	SRGAP1
0	0.339526	0.586	0.348	0	Sertoli cells	XPR1
0	0.339415	0.316	0.092	0	Sertoli cells	DIPK1A
0	0.339302	0.386	0.143	0	Sertoli cells	NT5DC1
0	0.338645	0.358	0.118	0	Sertoli cells	CTTN
0	0.338364	0.284	0.077	0	Sertoli cells	PLEKHH2
0	0.337299	0.463	0.205	0	Sertoli cells	PDLIM5
0	0.337018	0.302	0.075	0	Sertoli cells	PPIP5K1
0	0.336388	0.276	0.069	0	Sertoli cells	IFI16
0	0.335921	0.429	0.179	0	Sertoli cells	THOC2
0	0.335656	0.455	0.215	0	Sertoli cells	SESTD1
0	0.335405	0.397	0.155	0	Sertoli cells	TMX4
0	0.334587	0.302	0.073	0	Sertoli cells	NECTIN2
0	0.334126	0.336	0.102	0	Sertoli cells	ABCC5
0	0.332664	0.416	0.198	0	Sertoli cells	ZNF704
0	0.332276	0.319	0.076	0	Sertoli cells	SH3TC2
0	0.332054	0.292	0.07	0	Sertoli cells	PHKA2
0	0.331598	0.253	0.019	0	Sertoli cells	SPAAR
0	0.331263	0.48	0.237	0	Sertoli cells	DDX10
0	0.330909	0.364	0.126	0	Sertoli cells	ARHGAP17
0	0.329553	0.457	0.24	0	Sertoli cells	ERCC6L2
0	0.329196	0.345	0.097	0	Sertoli cells	ALDH1A1
0	0.328857	0.272	0.044	0	Sertoli cells	AL031772.1
0	0.328741	0.297	0.074	0	Sertoli cells	LMBR1L
0	0.328546	0.4	0.148	0	Sertoli cells	IFRD1
0	0.328479	0.3	0.068	0	Sertoli cells	FBRSL1
0	0.328047	0.398	0.15	0	Sertoli cells	PRKCI
0	0.328018	0.318	0.108	0	Sertoli cells	NPAS2
0	0.327571	0.386	0.151	0	Sertoli cells	IPO11
0	0.326891	0.367	0.132	0	Sertoli cells	BICD1
0	0.326637	0.287	0.074	0	Sertoli cells	NRG2
0	0.325984	0.279	0.053	0	Sertoli cells	MYO5C
0	0.325318	0.308	0.076	0	Sertoli cells	ACO1
0	0.325137	0.371	0.102	0	Sertoli cells	GREB1
0	0.32477	0.312	0.079	0	Sertoli cells	GAS6
0	0.324749	0.614	0.344	0	Sertoli cells	TCF4
0	0.324683	0.427	0.192	0	Sertoli cells	ATP2B1
0	0.324569	0.292	0.066	0	Sertoli cells	HPCAL1
0	0.324454	0.377	0.122	0	Sertoli cells	AL603840.1
0	0.321956	0.477	0.246	0	Sertoli cells	POGZ
0	0.321472	0.385	0.151	0	Sertoli cells	RAB11FIP3
0	0.321338	0.464	0.209	0	Sertoli cells	YAP1
0	0.321244	0.264	0.049	0	Sertoli cells	NUP62CL
0	0.321211	0.343	0.109	0	Sertoli cells	NDFIP1
0	0.321131	0.375	0.143	0	Sertoli cells	SGCE
0	0.320662	0.277	0.055	0	Sertoli cells	TAF11
0	0.320411	0.616	0.35	0	Sertoli cells	USP15
0	0.320086	0.332	0.097	0	Sertoli cells	DUSP16
0	0.320076	0.365	0.142	0	Sertoli cells	FGGY
0	0.319667	0.449	0.22	0	Sertoli cells	VPS54
0	0.319329	0.327	0.108	0	Sertoli cells	TTTY14
0	0.317733	0.309	0.092	0	Sertoli cells	MED25
0	0.317501	0.686	0.458	0	Sertoli cells	KTN1
0	0.317153	0.261	0.041	0	Sertoli cells	HOPX
0	0.31713	0.259	0.044	0	Sertoli cells	KITLG
0	0.316754	0.273	0.047	0	Sertoli cells	ATP8B2
0	0.316703	0.305	0.132	0	Sertoli cells	QSOX1
0	0.316352	0.567	0.327	0	Sertoli cells	ACYP2
0	0.316108	0.338	0.124	0	Sertoli cells	GRID1
0	0.315978	0.27	0.045	0	Sertoli cells	MOV10
0	0.315639	0.273	0.083	0	Sertoli cells	AC006148.1
0	0.315638	0.385	0.15	0	Sertoli cells	SLC35F5
0	0.314857	0.267	0.051	0	Sertoli cells	GRIPAP1
0	0.314674	0.383	0.17	0	Sertoli cells	SMARCA5
0	0.314117	0.307	0.087	0	Sertoli cells	NTN4
0	0.312779	0.349	0.099	0	Sertoli cells	SGK1
0	0.31258	0.431	0.195	0	Sertoli cells	PDCD6IP
0	0.3123	0.595	0.326	0	Sertoli cells	TNRC6A
0	0.311936	0.324	0.096	0	Sertoli cells	SCAP
0	0.311834	0.442	0.272	0	Sertoli cells	TIAM1
0	0.311547	0.333	0.11	0	Sertoli cells	CCNL1
0	0.311145	0.557	0.332	0	Sertoli cells	RABGAP1
0	0.310733	0.336	0.118	0	Sertoli cells	ENOX2
0	0.309261	0.37	0.163	0	Sertoli cells	HNRNPDL
0	0.308768	0.434	0.218	0	Sertoli cells	ARHGEF12
0	0.308721	0.817	0.285	0	Sertoli cells	NEAT1
0	0.308675	0.315	0.089	0	Sertoli cells	GMPR
0	0.308201	0.264	0.045	0	Sertoli cells	ACTN2
0	0.307716	0.378	0.178	0	Sertoli cells	CRYBG3
0	0.30744	0.417	0.18	0	Sertoli cells	CTBP2
0	0.307306	0.25	0.034	0	Sertoli cells	KYAT3
3.97289e-169	0.30684	0.931	0.93	1.40398e-164	Sertoli cells	MT-CO3
0	0.305852	0.293	0.073	0	Sertoli cells	SETD7
0	0.305191	0.585	0.368	0	Sertoli cells	CSPP1
0	0.304746	0.316	0.116	0	Sertoli cells	GRAMD1B
0	0.303669	0.298	0.075	0	Sertoli cells	DNMT3A
0	0.302615	0.286	0.099	0	Sertoli cells	AC009120.2
0	0.302072	0.266	0.043	0	Sertoli cells	MYLK3
0	0.301993	0.317	0.096	0	Sertoli cells	OSBPL11
0	0.301979	0.292	0.081	0	Sertoli cells	DCUN1D2
0	0.301915	0.317	0.111	0	Sertoli cells	ZCCHC17
0	0.301875	0.311	0.096	0	Sertoli cells	SETDB2
0	0.301745	0.388	0.167	0	Sertoli cells	ATF6
0	0.30146	0.476	0.255	0	Sertoli cells	TRA2A
0	0.301184	0.302	0.075	0	Sertoli cells	ARHGAP6
0	0.301116	0.431	0.213	0	Sertoli cells	STXBP5L
0	0.301089	0.678	0.329	0	Sertoli cells	MIR99AHG
0	0.300655	0.492	0.264	0	Sertoli cells	ZFR
0	0.3002	0.41	0.184	0	Sertoli cells	MYEF2
0	0.300107	0.569	0.333	0	Sertoli cells	PPP1R12A
0	0.29986	0.417	0.199	0	Sertoli cells	ARFGEF2
0	0.299712	0.366	0.156	0	Sertoli cells	AGPAT5
0	0.299168	0.489	0.309	0	Sertoli cells	TTC3
0	0.298942	0.467	0.248	0	Sertoli cells	RICTOR
0	0.298833	0.386	0.169	0	Sertoli cells	OLA1
0	0.297921	0.275	0.069	0	Sertoli cells	EPPIN
0	0.297914	0.256	0.041	0	Sertoli cells	MMP28
0	0.297681	0.434	0.215	0	Sertoli cells	ARHGEF11
0	0.297667	0.259	0.048	0	Sertoli cells	DAAM2
0	0.297072	0.301	0.087	0	Sertoli cells	KREMEN1
0	0.296911	0.285	0.09	0	Sertoli cells	NELFA
0	0.296797	0.458	0.259	0	Sertoli cells	CDC42SE2
0	0.296782	0.401	0.195	0	Sertoli cells	SEC31A
0	0.296614	0.399	0.171	0	Sertoli cells	CLCN3
0	0.29595	0.573	0.342	0	Sertoli cells	SENP6
0	0.295864	0.253	0.053	0	Sertoli cells	MVP
0	0.295851	0.263	0.066	0	Sertoli cells	EPM2AIP1
0	0.295787	0.289	0.075	0	Sertoli cells	CXADR
0	0.295694	0.483	0.252	0	Sertoli cells	DOCK7
0	0.295113	0.359	0.131	0	Sertoli cells	NFIC
0	0.294771	0.273	0.063	0	Sertoli cells	PRKX
0	0.294662	0.406	0.192	0	Sertoli cells	CD2AP
0	0.294425	0.544	0.284	0	Sertoli cells	FOXN3
0	0.294066	0.417	0.179	0	Sertoli cells	SSBP3
0	0.29404	0.524	0.291	0	Sertoli cells	NSD1
0	0.293816	0.33	0.122	0	Sertoli cells	LMO7
0	0.293742	0.279	0.066	0	Sertoli cells	EMB
0	0.293064	0.366	0.15	0	Sertoli cells	ETV6
0	0.291959	0.604	0.382	0	Sertoli cells	PCNX1
0	0.291736	0.663	0.434	0	Sertoli cells	SIPA1L1
4.15339e-254	0.291645	0.533	0.409	1.46777e-249	Sertoli cells	CLU
0	0.291605	0.315	0.098	0	Sertoli cells	SLC5A3
0	0.291356	0.396	0.173	0	Sertoli cells	PIK3C3
0	0.291306	0.515	0.294	0	Sertoli cells	SHTN1
0	0.290566	0.298	0.095	0	Sertoli cells	MORC4
0	0.29021	0.36	0.171	0	Sertoli cells	RAD50
0	0.29015	0.511	0.311	0	Sertoli cells	AHCYL2
0	0.290107	0.347	0.134	0	Sertoli cells	PCNX2
0	0.28994	0.457	0.252	0	Sertoli cells	FUS
0	0.288999	0.31	0.097	0	Sertoli cells	OCRL
0	0.28825	0.488	0.274	0	Sertoli cells	CHD1
0	0.287188	0.291	0.086	0	Sertoli cells	CA5B
0	0.287167	0.367	0.218	0	Sertoli cells	AC104664.1
0	0.286886	0.462	0.246	0	Sertoli cells	MAP2K5
0	0.286686	0.517	0.292	0	Sertoli cells	SETD5
0	0.286686	0.278	0.072	0	Sertoli cells	DUBR
0	0.286436	0.552	0.335	0	Sertoli cells	NCOR1
0	0.286217	0.354	0.135	0	Sertoli cells	HIF1A
0	0.286007	0.379	0.158	0	Sertoli cells	KIF13B
0	0.286003	0.264	0.049	0	Sertoli cells	GSTA4
0	0.28555	0.325	0.14	0	Sertoli cells	NUMA1
0	0.28524	0.254	0.051	0	Sertoli cells	ZNF189
0	0.285072	0.25	0.048	0	Sertoli cells	NHSL2
0	0.284503	0.515	0.285	0	Sertoli cells	ITCH
0	0.284439	0.508	0.287	0	Sertoli cells	PHLPP1
0	0.28397	0.302	0.111	0	Sertoli cells	COPA
0	0.283963	0.25	0.047	0	Sertoli cells	LONRF2
0	0.283848	0.426	0.208	0	Sertoli cells	SH3D19
0	0.283628	0.343	0.141	0	Sertoli cells	ZNF106
0	0.28349	0.51	0.304	0	Sertoli cells	EHMT1
0	0.283283	0.612	0.393	0	Sertoli cells	ANKRD11
0	0.281847	0.258	0.057	0	Sertoli cells	AC053527.2
0	0.281504	0.254	0.049	0	Sertoli cells	ZC3HAV1
0	0.281447	0.293	0.09	0	Sertoli cells	AGO2
0	0.280728	0.268	0.066	0	Sertoli cells	CDS1
0	0.280726	0.362	0.161	0	Sertoli cells	GABPB1-AS1
0	0.280337	0.368	0.153	0	Sertoli cells	TTC7A
0	0.28019	0.418	0.211	0	Sertoli cells	PATJ
0	0.279932	0.585	0.387	0	Sertoli cells	ANKIB1
0	0.279841	0.316	0.116	0	Sertoli cells	PPM1K
0	0.279343	0.338	0.155	0	Sertoli cells	ZKSCAN1
0	0.279202	0.276	0.077	0	Sertoli cells	AC006504.5
0	0.278691	0.486	0.25	0	Sertoli cells	EPS8
0	0.278389	0.391	0.188	0	Sertoli cells	CDC42BPB
0	0.27827	0.258	0.06	0	Sertoli cells	STX3
0	0.277764	0.406	0.203	0	Sertoli cells	RNF19A
0	0.277247	0.283	0.077	0	Sertoli cells	LINC01278
0	0.277018	0.297	0.097	0	Sertoli cells	ZNF827
0	0.27691	0.608	0.391	0	Sertoli cells	SRSF11
0	0.276118	0.437	0.215	0	Sertoli cells	SIL1
0	0.276098	0.301	0.094	0	Sertoli cells	ECE1
0	0.275902	0.414	0.207	0	Sertoli cells	CUL1
0	0.275736	0.326	0.121	0	Sertoli cells	NFE2L2
0	0.275632	0.285	0.127	0	Sertoli cells	LMCD1-AS1
0	0.274938	0.397	0.197	0	Sertoli cells	STRN
0	0.274664	0.418	0.202	0	Sertoli cells	UBR2
0	0.27453	0.473	0.287	0	Sertoli cells	OTUD7A
0	0.273442	0.279	0.079	0	Sertoli cells	NAPB
0	0.273168	0.425	0.211	0	Sertoli cells	LHFPL6
0	0.272112	0.429	0.237	0	Sertoli cells	BRD4
0	0.271749	0.325	0.129	0	Sertoli cells	AIG1
0	0.271714	0.323	0.12	0	Sertoli cells	MAT2A
0	0.271449	0.435	0.233	0	Sertoli cells	SESN1
0	0.271051	0.485	0.282	0	Sertoli cells	CHD2
0	0.26996	0.293	0.103	0	Sertoli cells	FAT1
0	0.269308	0.417	0.213	0	Sertoli cells	RAB2A
0	0.268703	0.495	0.268	0	Sertoli cells	PICALM
0	0.26826	0.256	0.064	0	Sertoli cells	HK2
0	0.26825	0.322	0.125	0	Sertoli cells	ADAM9
0	0.268179	0.342	0.144	0	Sertoli cells	KLHL7
0	0.26774	0.253	0.063	0	Sertoli cells	IFI27L1
0	0.267555	0.28	0.082	0	Sertoli cells	PELI1
5.87376e-212	0.267447	0.835	0.799	2.07573e-207	Sertoli cells	MT-ND1
0	0.267436	0.423	0.215	0	Sertoli cells	USP37
0	0.266952	0.425	0.219	0	Sertoli cells	ETNK1
0	0.266699	0.339	0.13	0	Sertoli cells	ATF7
0	0.266108	0.283	0.101	0	Sertoli cells	SLC36A4
0	0.26549	0.462	0.29	0	Sertoli cells	PACS1
0	0.26536	0.309	0.121	0	Sertoli cells	OTUD7B
0	0.264994	0.285	0.092	0	Sertoli cells	HMGN3
0	0.264381	0.488	0.278	0	Sertoli cells	PIP5K1A
0	0.26431	0.527	0.322	0	Sertoli cells	MEF2A
0	0.263971	0.262	0.084	0	Sertoli cells	HMGN5
0	0.263927	0.638	0.268	0	Sertoli cells	FKBP5
0	0.26366	0.546	0.328	0	Sertoli cells	COG5
0	0.263173	0.299	0.106	0	Sertoli cells	DECR1
0	0.262883	0.34	0.148	0	Sertoli cells	EDRF1
0	0.261921	0.296	0.103	0	Sertoli cells	NAPEPLD
0	0.261828	0.352	0.165	0	Sertoli cells	ZNF91
0	0.261292	0.301	0.11	0	Sertoli cells	ZNF326
0	0.260801	0.298	0.109	0	Sertoli cells	MB21D2
0	0.260632	0.637	0.433	0	Sertoli cells	SOX6
0	0.260519	0.547	0.349	0	Sertoli cells	ZFAND6
0	0.260316	0.286	0.11	0	Sertoli cells	TSPYL2
0	0.26014	0.363	0.189	0	Sertoli cells	INSR
0	0.26005	0.404	0.195	0	Sertoli cells	NCKAP1
0	0.259959	0.25	0.06	0	Sertoli cells	ZNF708
0	0.259714	0.328	0.13	0	Sertoli cells	DNM2
0	0.259512	0.37	0.193	0	Sertoli cells	GON4L
0	0.259465	0.41	0.211	0	Sertoli cells	RBM33
0	0.259394	0.328	0.138	0	Sertoli cells	SH3RF1
0	0.259116	0.438	0.235	0	Sertoli cells	ADNP
0	0.258737	0.304	0.116	0	Sertoli cells	CDKL5
0	0.258189	0.29	0.105	0	Sertoli cells	CMTR1
0	0.25737	0.449	0.256	0	Sertoli cells	CHD6
0	0.257214	0.281	0.088	0	Sertoli cells	DNMBP
0	0.256955	0.448	0.246	0	Sertoli cells	TASOR2
0	0.256809	0.343	0.17	0	Sertoli cells	DDX42
0	0.256661	0.27	0.083	0	Sertoli cells	FBXO9
0	0.256583	0.393	0.213	0	Sertoli cells	BCLAF1
0	0.256292	0.361	0.165	0	Sertoli cells	YME1L1
0	0.255466	0.378	0.176	0	Sertoli cells	TMEM245
0	0.255417	0.41	0.218	0	Sertoli cells	NEK7
0	0.254802	0.674	0.268	0	Sertoli cells	TSHZ2
0	0.25477	0.322	0.151	0	Sertoli cells	NRIP1
0	0.254456	0.342	0.159	0	Sertoli cells	LINC01725
0	0.254416	0.409	0.219	0	Sertoli cells	ITSN2
0	0.254368	0.425	0.238	0	Sertoli cells	PDE8A
0	0.254229	0.307	0.124	0	Sertoli cells	SLC9C2
0	0.2542	0.336	0.144	0	Sertoli cells	ABI1
0	0.253563	0.493	0.283	0	Sertoli cells	GPATCH8
0	0.253487	0.439	0.268	0	Sertoli cells	VPS53
0	0.25344	0.335	0.133	0	Sertoli cells	SASH1
0	0.253383	0.261	0.1	0	Sertoli cells	PRELID2
0	0.253314	0.286	0.104	0	Sertoli cells	NCOA7
0	0.253282	0.439	0.234	0	Sertoli cells	FOXO1
0	0.253104	0.276	0.09	0	Sertoli cells	ZNF846
0	0.253027	0.309	0.122	0	Sertoli cells	PDHX
0	0.25287	0.282	0.096	0	Sertoli cells	CHM
0	0.252807	0.62	0.42	0	Sertoli cells	CAMTA1
0	0.252152	0.339	0.163	0	Sertoli cells	FAM169A
0	0.252095	0.264	0.082	0	Sertoli cells	CUL4B
0	0.252077	0.272	0.094	0	Sertoli cells	MLLT6
0	0.25205	0.325	0.142	0	Sertoli cells	FAM126B
0	0.252034	0.284	0.106	0	Sertoli cells	AF117829.1
0	0.251397	0.355	0.169	0	Sertoli cells	TRIM24
0	0.250968	0.282	0.093	0	Sertoli cells	OGT
3.02871e-304	0.25093	0.314	0.199	1.07032e-299	Sertoli cells	RNMT
0	0.250773	0.31	0.136	0	Sertoli cells	DHX32
0	0.250423	0.286	0.098	0	Sertoli cells	GK5
0	1.29931	0.573	0.101	0	Spermatogonia	AL163541.1
0	1.29368	0.744	0.357	0	Spermatogonia	CALN1
0	1.06206	0.724	0.371	0	Spermatogonia	AC011287.1
0	1.04455	0.671	0.235	0	Spermatogonia	AL117329.1
0	1.03906	0.558	0.204	0	Spermatogonia	AGMO
0	1.02202	0.611	0.155	0	Spermatogonia	MTUS2
0	0.942245	0.638	0.317	0	Spermatogonia	AC106793.1
0	0.884399	0.46	0.148	0	Spermatogonia	LINC02096
0	0.84328	0.648	0.346	0	Spermatogonia	FMN1
0	0.829101	0.59	0.209	0	Spermatogonia	AC013287.1
0	0.817407	0.541	0.184	0	Spermatogonia	NRG3
0	0.80779	0.714	0.389	0	Spermatogonia	SPIDR
0	0.801435	0.589	0.239	0	Spermatogonia	AL691420.1
0	0.798878	0.545	0.155	0	Spermatogonia	AC093459.1
0	0.781494	0.581	0.221	0	Spermatogonia	AC106729.1
0	0.769441	0.533	0.172	0	Spermatogonia	AC069277.1
0	0.740909	0.708	0.397	0	Spermatogonia	SDK1
0	0.740807	0.555	0.186	0	Spermatogonia	FAM189A1
0	0.740602	0.504	0.136	0	Spermatogonia	HS6ST3
0	0.700929	0.412	0.086	0	Spermatogonia	GCNT2
0	0.700619	0.53	0.157	0	Spermatogonia	AC061958.1
0	0.699957	0.494	0.135	0	Spermatogonia	SEMA6D
0	0.689182	0.601	0.237	0	Spermatogonia	AFF3
0	0.677491	0.56	0.201	0	Spermatogonia	CASC15
0	0.676127	0.53	0.171	0	Spermatogonia	CTNND2
0	0.671616	0.5	0.157	0	Spermatogonia	GABRG3
0	0.669478	0.431	0.102	0	Spermatogonia	LINC01194
0	0.661288	0.619	0.26	0	Spermatogonia	LARGE1
0	0.657817	0.495	0.158	0	Spermatogonia	IL1RAPL1
0	0.654947	0.443	0.087	0	Spermatogonia	AL136962.1
0	0.652482	0.613	0.368	0	Spermatogonia	FAM155A
0	0.649255	0.471	0.127	0	Spermatogonia	SH3RF3
0	0.637783	0.46	0.155	0	Spermatogonia	PKN2-AS1
0	0.635164	0.325	0.051	0	Spermatogonia	LY86-AS1
0	0.632131	0.588	0.268	0	Spermatogonia	NLGN1
0	0.605651	0.641	0.352	0	Spermatogonia	CACNA2D3
0	0.602959	0.446	0.131	0	Spermatogonia	COL23A1
0	0.601511	0.358	0.088	0	Spermatogonia	LINC02511
0	0.596706	0.65	0.381	0	Spermatogonia	AGAP1
0	0.585596	0.423	0.099	0	Spermatogonia	AC093898.1
0	0.585497	0.473	0.123	0	Spermatogonia	CECR2
0	0.583097	0.769	0.571	0	Spermatogonia	WWOX
0	0.580658	0.484	0.192	0	Spermatogonia	SPECC1
0	0.572239	0.529	0.288	0	Spermatogonia	LINC00624
0	0.567735	0.497	0.21	0	Spermatogonia	AC068633.1
0	0.567238	0.513	0.213	0	Spermatogonia	MDGA2
0	0.566263	0.416	0.115	0	Spermatogonia	AL355838.1
0	0.565456	0.465	0.156	0	Spermatogonia	BMPR1B
0	0.565126	0.446	0.166	0	Spermatogonia	C5orf17
0	0.564847	0.573	0.272	0	Spermatogonia	DPP10
0	0.560039	0.912	0.687	0	Spermatogonia	RUNX1
0	0.559908	0.458	0.156	0	Spermatogonia	GPC6
0	0.558326	0.408	0.126	0	Spermatogonia	NKAIN2
0	0.554781	0.418	0.104	0	Spermatogonia	AC073050.1
0	0.552965	0.629	0.395	0	Spermatogonia	HULC
0	0.548548	0.4	0.107	0	Spermatogonia	SLC35F3
0	0.541645	0.472	0.183	0	Spermatogonia	CADM2
0	0.534808	0.466	0.176	0	Spermatogonia	RGS7
0	0.532044	0.426	0.119	0	Spermatogonia	IGF2BP2
0	0.52916	0.449	0.157	0	Spermatogonia	MEF2C-AS1
0	0.52777	0.347	0.066	0	Spermatogonia	AC005208.1
0	0.527042	0.65	0.364	0	Spermatogonia	DOCK3
0	0.523377	0.5	0.207	0	Spermatogonia	SYT14
0	0.520773	0.429	0.136	0	Spermatogonia	ACOXL
0	0.518834	0.649	0.426	0	Spermatogonia	RANBP17
0	0.516778	0.35	0.073	0	Spermatogonia	AC106744.1
0	0.516538	0.427	0.161	0	Spermatogonia	GRIP1
0	0.509068	0.451	0.148	0	Spermatogonia	PELI2
0	0.505451	0.342	0.071	0	Spermatogonia	LINC01422
0	0.503993	0.315	0.077	0	Spermatogonia	AP000561.1
0	0.50395	0.489	0.201	0	Spermatogonia	CNTN4
0	0.500202	0.458	0.234	0	Spermatogonia	AL022068.1
0	0.49777	0.431	0.14	0	Spermatogonia	SNTG2
0	0.495861	0.663	0.397	0	Spermatogonia	PARD3
0	0.495582	0.377	0.114	0	Spermatogonia	ROR2
0	0.49553	0.57	0.355	0	Spermatogonia	FOXP1
0	0.488555	0.458	0.181	0	Spermatogonia	AP005262.2
0	0.487918	0.573	0.297	0	Spermatogonia	LINC02055
0	0.485788	0.37	0.112	0	Spermatogonia	AC092957.1
0	0.485238	0.427	0.186	0	Spermatogonia	CCDC144NL-AS1
0	0.484621	0.537	0.276	0	Spermatogonia	AL353595.1
0	0.483649	0.388	0.102	0	Spermatogonia	LINC01019
0	0.481981	0.337	0.113	0	Spermatogonia	AC004083.1
0	0.480794	0.382	0.087	0	Spermatogonia	COBL
0	0.480466	0.383	0.123	0	Spermatogonia	AL162493.1
0	0.473156	0.47	0.176	0	Spermatogonia	LDLRAD4
0	0.473077	0.492	0.206	0	Spermatogonia	CAMK1D
0	0.4723	0.517	0.277	0	Spermatogonia	GTDC1
0	0.472216	0.403	0.125	0	Spermatogonia	BACH2
0	0.470327	0.503	0.241	0	Spermatogonia	FANCC
0	0.47022	0.34	0.089	0	Spermatogonia	BASP1
0	0.469542	0.342	0.076	0	Spermatogonia	C22orf34
0	0.469164	0.428	0.164	0	Spermatogonia	GABRB3
0	0.467419	0.399	0.12	0	Spermatogonia	FAT3
0	0.463849	0.374	0.121	0	Spermatogonia	AL157886.1
0	0.462407	0.341	0.106	0	Spermatogonia	AL035401.1
0	0.461414	0.432	0.189	0	Spermatogonia	LINC01122
0	0.459094	0.428	0.181	0	Spermatogonia	GNAI1
0	0.45763	0.441	0.219	0	Spermatogonia	PWRN4
0	0.456608	0.347	0.111	0	Spermatogonia	AC093866.1
0	0.448371	0.304	0.063	0	Spermatogonia	LINC02253
0	0.445731	0.52	0.256	0	Spermatogonia	DPYD
0	0.44469	0.541	0.315	0	Spermatogonia	FBXW7
0	0.441939	0.299	0.102	0	Spermatogonia	ZNF804B
0	0.435875	0.394	0.137	0	Spermatogonia	LINC02240
0	0.435469	0.373	0.105	0	Spermatogonia	NEDD4L
0	0.435429	0.554	0.304	0	Spermatogonia	LINC01524
0	0.433676	0.478	0.242	0	Spermatogonia	MIR4300HG
0	0.433072	0.311	0.066	0	Spermatogonia	AC090809.1
0	0.432286	0.364	0.109	0	Spermatogonia	SLC30A8
0	0.431868	0.375	0.109	0	Spermatogonia	ADAM23
0	0.43053	0.274	0.058	0	Spermatogonia	AC010197.1
0	0.427318	0.396	0.172	0	Spermatogonia	TRIM5
0	0.423897	0.886	0.688	0	Spermatogonia	MACROD2
0	0.422178	0.469	0.202	0	Spermatogonia	TENM3
0	0.419255	0.426	0.162	0	Spermatogonia	CACNA1A
0	0.418942	0.487	0.24	0	Spermatogonia	HDAC9
0	0.417913	0.388	0.18	0	Spermatogonia	KCNIP4
0	0.417747	0.325	0.113	0	Spermatogonia	AC008050.1
0	0.417339	0.417	0.151	0	Spermatogonia	LTBP1
0	0.416825	0.331	0.102	0	Spermatogonia	AC090578.1
0	0.415622	0.316	0.07	0	Spermatogonia	CDH4
0	0.414466	0.494	0.28	0	Spermatogonia	AC060765.2
0	0.414416	0.29	0.059	0	Spermatogonia	AL442163.1
0	0.414141	0.515	0.263	0	Spermatogonia	PTPRD
0	0.413976	0.538	0.311	0	Spermatogonia	GALNT17
0	0.409926	0.376	0.144	0	Spermatogonia	AF165147.1
0	0.409497	0.403	0.154	0	Spermatogonia	DTNB
0	0.408598	0.337	0.12	0	Spermatogonia	PER3
0	0.40832	0.396	0.147	0	Spermatogonia	KLF12
0	0.407773	0.52	0.269	0	Spermatogonia	RBFOX1
0	0.405506	0.32	0.073	0	Spermatogonia	NRCAM
0	0.402379	0.289	0.072	0	Spermatogonia	AC064834.1
0	0.40179	0.392	0.18	0	Spermatogonia	LINC02476
0	0.398453	0.535	0.306	0	Spermatogonia	GMDS
0	0.398297	0.912	0.713	0	Spermatogonia	AUTS2
0	0.397824	0.308	0.082	0	Spermatogonia	AC046195.1
0	0.396691	0.443	0.194	0	Spermatogonia	CACNA1C
0	0.39257	0.339	0.093	0	Spermatogonia	ARHGEF26
0	0.392193	0.427	0.191	0	Spermatogonia	RNF130
0	0.391873	0.271	0.046	0	Spermatogonia	LINC02074
0	0.391643	0.492	0.278	0	Spermatogonia	TBL1XR1
0	0.391624	0.456	0.239	0	Spermatogonia	TMEM117
0	0.390791	0.326	0.095	0	Spermatogonia	MLLT3
0	0.388818	0.493	0.284	0	Spermatogonia	HPSE2
0	0.387657	0.383	0.159	0	Spermatogonia	AC090015.1
0	0.386445	0.329	0.124	0	Spermatogonia	CHD7
0	0.38554	0.252	0.032	0	Spermatogonia	AL358232.2
0	0.38488	0.291	0.065	0	Spermatogonia	SPANXA2-OT1
0	0.384444	0.525	0.313	0	Spermatogonia	CDK14
0	0.383191	0.426	0.216	0	Spermatogonia	CNTNAP2
0	0.382592	0.396	0.189	0	Spermatogonia	RFC3
0	0.381403	0.567	0.368	0	Spermatogonia	SMG6
0	0.380748	0.344	0.117	0	Spermatogonia	GNAL
0	0.380511	0.366	0.134	0	Spermatogonia	ADGRV1
0	0.378749	0.347	0.122	0	Spermatogonia	GAREM1
0	0.376979	0.384	0.153	0	Spermatogonia	MGMT
0	0.375323	0.261	0.052	0	Spermatogonia	AL137001.2
0	0.36951	0.3	0.088	0	Spermatogonia	POU6F2
0	0.369318	0.38	0.165	0	Spermatogonia	AL110292.1
0	0.367824	0.647	0.453	0	Spermatogonia	RABGAP1L
0	0.362686	0.571	0.388	0	Spermatogonia	AC007319.1
0	0.357692	0.486	0.305	0	Spermatogonia	RIF1
0	0.356827	0.293	0.089	0	Spermatogonia	AL356804.1
0	0.356565	0.299	0.072	0	Spermatogonia	CHRNA7
0	0.354297	0.308	0.112	0	Spermatogonia	C8orf37-AS1
0	0.353588	0.438	0.231	0	Spermatogonia	PCLO
0	0.353022	0.305	0.079	0	Spermatogonia	AL390800.1
0	0.351907	0.398	0.188	0	Spermatogonia	DAB1
0	0.349493	0.401	0.199	0	Spermatogonia	RAPGEF2
0	0.348744	0.45	0.239	0	Spermatogonia	TEAD1
0	0.347595	0.296	0.081	0	Spermatogonia	KHDRBS2
0	0.347547	0.319	0.104	0	Spermatogonia	TMEM132C
0	0.345465	0.289	0.102	0	Spermatogonia	AL008633.1
0	0.344748	0.25	0.047	0	Spermatogonia	LYPD6
0	0.343117	0.404	0.193	0	Spermatogonia	SYN2
0	0.340522	0.651	0.382	0	Spermatogonia	DLGAP2
0	0.340404	0.323	0.111	0	Spermatogonia	SHISA6
0	0.339622	0.738	0.585	0	Spermatogonia	SMYD3
0	0.339062	0.605	0.475	0	Spermatogonia	SUPT3H
0	0.337643	0.443	0.251	0	Spermatogonia	TBL1X
0	0.33748	0.474	0.305	0	Spermatogonia	ROBO2
0	0.336718	0.295	0.12	0	Spermatogonia	SCN7A
0	0.334194	0.358	0.175	0	Spermatogonia	LINC00923
0	0.33369	0.353	0.174	0	Spermatogonia	AC106799.2
0	0.33353	0.394	0.205	0	Spermatogonia	TMTC2
0	0.333328	0.368	0.232	0	Spermatogonia	GCC2
0	0.332738	0.276	0.069	0	Spermatogonia	KCNN2
0	0.329144	0.269	0.062	0	Spermatogonia	KIAA1549L
0	0.32902	0.363	0.156	0	Spermatogonia	RPS6KA5
0	0.328886	0.621	0.442	0	Spermatogonia	NRXN1
0	0.328502	0.34	0.126	0	Spermatogonia	MBOAT2
0	0.32838	0.583	0.43	0	Spermatogonia	CAMTA1
0	0.327454	0.678	0.516	0	Spermatogonia	STAG1
0	0.327156	0.387	0.2	0	Spermatogonia	AC079142.1
0	0.325121	0.865	0.718	0	Spermatogonia	JMJD1C
0	0.324349	0.313	0.11	0	Spermatogonia	AC107419.1
0	0.323927	0.331	0.129	0	Spermatogonia	ADGRA3
0	0.323175	0.362	0.133	0	Spermatogonia	PDZRN3
0	0.322701	0.659	0.519	0	Spermatogonia	ERC1
0	0.321447	0.271	0.095	0	Spermatogonia	PTCHD1-AS
0	0.320769	0.329	0.124	0	Spermatogonia	FAM160A1
0	0.319743	0.368	0.165	0	Spermatogonia	MED12L
0	0.31938	0.44	0.258	0	Spermatogonia	ZRANB2-AS2
0	0.317886	0.278	0.13	0	Spermatogonia	RYR3
0	0.317666	0.397	0.2	0	Spermatogonia	ZFYVE9
0	0.317177	0.25	0.052	0	Spermatogonia	AL359636.2
0	0.313962	0.37	0.179	0	Spermatogonia	AUH
0	0.312156	0.366	0.169	0	Spermatogonia	KIF13A
0	0.308401	0.331	0.152	0	Spermatogonia	ELAVL2
0	0.307397	0.409	0.213	0	Spermatogonia	MYO1D
0	0.307329	0.616	0.389	0	Spermatogonia	TEX41
0	0.306967	0.268	0.086	0	Spermatogonia	TLE1
0	0.306586	0.411	0.235	0	Spermatogonia	FARS2
0	0.306527	0.34	0.19	0	Spermatogonia	PCNT
0	0.306487	0.285	0.094	0	Spermatogonia	SH3GL2
0	0.306472	0.316	0.133	0	Spermatogonia	LINC01446
0	0.306024	0.33	0.14	0	Spermatogonia	CHN1
0	0.304837	0.331	0.154	0	Spermatogonia	RIMS1
0	0.304309	0.28	0.08	0	Spermatogonia	SCN8A
0	0.304254	0.418	0.198	0	Spermatogonia	TEX15
0	0.303558	0.377	0.195	0	Spermatogonia	BMERB1
0	0.302537	0.304	0.107	0	Spermatogonia	SFMBT2
0	0.302121	0.271	0.08	0	Spermatogonia	TPD52
0	0.301685	0.263	0.073	0	Spermatogonia	MMP16
0	0.301638	0.29	0.1	0	Spermatogonia	ANO4
0	0.301592	0.283	0.092	0	Spermatogonia	PDGFD
0	0.301322	0.284	0.087	0	Spermatogonia	NLGN4X
0	0.300669	0.353	0.162	0	Spermatogonia	ADGRL2
0	0.300572	0.598	0.45	0	Spermatogonia	SIPA1L1
0	0.300319	0.287	0.091	0	Spermatogonia	TMEM131L
0	0.299979	0.264	0.084	0	Spermatogonia	LINC01205
0	0.29906	0.465	0.291	0	Spermatogonia	OTUD7A
0	0.299055	0.387	0.203	0	Spermatogonia	ZDHHC20
0	0.298801	0.409	0.221	0	Spermatogonia	ITSN1
0	0.298356	0.417	0.254	0	Spermatogonia	GALNTL6
0	0.297981	0.266	0.073	0	Spermatogonia	ZNF618
0	0.296753	0.331	0.138	0	Spermatogonia	CPEB1
0	0.295596	0.398	0.213	0	Spermatogonia	EPB41L5
0	0.295456	0.257	0.079	0	Spermatogonia	EDIL3
0	0.293449	0.417	0.226	0	Spermatogonia	PDE10A
0	0.292512	0.365	0.182	0	Spermatogonia	TLN2
0	0.292045	0.368	0.18	0	Spermatogonia	CCDC138
0	0.290969	0.416	0.241	0	Spermatogonia	CDH18
0	0.290191	0.31	0.119	0	Spermatogonia	YEATS2
0	0.289522	0.409	0.213	0	Spermatogonia	NRXN3
2.09078e-184	0.289398	0.424	0.329	7.38862e-180	Spermatogonia	RBM25
0	0.289111	0.325	0.135	0	Spermatogonia	BICDL1
0	0.28889	0.342	0.173	0	Spermatogonia	TENM2
0	0.288113	0.491	0.346	0	Spermatogonia	ZNF407
0	0.288099	0.8	0.669	0	Spermatogonia	RERE
0	0.286168	0.334	0.159	0	Spermatogonia	LINC01266
0	0.285941	0.672	0.533	0	Spermatogonia	UBE2E2
0	0.285853	0.361	0.178	0	Spermatogonia	TRAF3
0	0.285094	0.332	0.169	0	Spermatogonia	AP001831.1
0	0.283654	0.415	0.211	0	Spermatogonia	MYT1L
0	0.281366	0.524	0.298	0	Spermatogonia	ZFPM2
0	0.280651	0.314	0.156	0	Spermatogonia	MSR1
0	0.27853	0.393	0.217	0	Spermatogonia	STK31
0	0.276554	0.356	0.175	0	Spermatogonia	LINC00470
0	0.275084	0.25	0.083	0	Spermatogonia	AC092445.1
0	0.274844	0.329	0.156	0	Spermatogonia	FRY
0	0.2747	0.387	0.225	0	Spermatogonia	FAM227B
0	0.274627	0.262	0.108	0	Spermatogonia	LINC01876
0	0.274613	0.548	0.413	0	Spermatogonia	DLG1
0	0.273958	0.316	0.136	0	Spermatogonia	NARS2
0	0.27325	0.298	0.113	0	Spermatogonia	STK32B
0	0.272644	0.258	0.107	0	Spermatogonia	LINC00871
0	0.272126	0.342	0.161	0	Spermatogonia	NEO1
0	0.271655	0.4	0.248	0	Spermatogonia	PDE4D
0	0.269526	0.269	0.094	0	Spermatogonia	AC097515.1
0	0.269147	0.344	0.166	0	Spermatogonia	SORCS1
0	0.268191	0.274	0.103	0	Spermatogonia	CDK6
0	0.26583	0.269	0.117	0	Spermatogonia	AC091078.1
0	0.265057	0.25	0.071	0	Spermatogonia	VOPP1
0	0.265005	0.298	0.137	0	Spermatogonia	FGF12
0	0.264792	0.881	0.763	0	Spermatogonia	PRKN
0	0.263299	0.311	0.144	0	Spermatogonia	DNAH3
0	0.262719	0.568	0.408	0	Spermatogonia	AC011246.1
0	0.261824	0.32	0.146	0	Spermatogonia	EVL
0	0.260927	0.328	0.196	0	Spermatogonia	DHRSX
0	0.260448	0.27	0.101	0	Spermatogonia	PPARG
0	0.25954	0.343	0.178	0	Spermatogonia	PPM1L
0	0.259202	0.28	0.113	0	Spermatogonia	PHF21B
0	0.258815	0.406	0.252	0	Spermatogonia	TMEM131
0	0.258485	0.341	0.189	0	Spermatogonia	PCDH15
0	0.258428	0.28	0.111	0	Spermatogonia	FAM117B
0	0.258171	0.326	0.161	0	Spermatogonia	MAD1L1
1.84816e-221	0.257118	0.619	0.517	6.53123e-217	Spermatogonia	ZNF638
0	0.257096	0.262	0.09	0	Spermatogonia	ATP8A1
0	0.256989	0.411	0.254	0	Spermatogonia	ABL1
0	0.25629	0.68	0.542	0	Spermatogonia	GPHN
3.12818e-175	0.254066	0.342	0.255	1.10547e-170	Spermatogonia	SREK1
0	0.254039	0.386	0.221	0	Spermatogonia	PKP4
0	0.253994	0.33	0.16	0	Spermatogonia	LINC02377
0	0.252019	0.597	0.421	0	Spermatogonia	SCAPER
0	0.251669	0.332	0.164	0	Spermatogonia	CADPS2
0	0.251312	0.279	0.122	0	Spermatogonia	SLIT2
0	0.251143	0.546	0.285	0	Spermatogonia	BNC2
0	0.250726	0.344	0.182	0	Spermatogonia	ANO10
0	0.250477	0.26	0.095	0	Spermatogonia	ZNF521
0	3.88737	0.957	0.366	0	Peritubular cells	NEAT1
0	2.51558	1	0.982	0	Peritubular cells	MALAT1
0	2.36477	0.936	0.326	0	Peritubular cells	TSHZ2
0	1.92591	0.711	0.138	0	Peritubular cells	PRPS2
0	1.90827	0.694	0.225	0	Peritubular cells	ACSM3
0	1.83676	0.876	0.317	0	Peritubular cells	BNC2
0	1.79223	0.791	0.142	0	Peritubular cells	CACNB2
0	1.78351	0.57	0.148	0	Peritubular cells	MEG3
0	1.62332	0.46	0.134	0	Peritubular cells	MEG8
0	1.61941	0.496	0.064	0	Peritubular cells	PDK4
0	1.56298	0.628	0.14	0	Peritubular cells	GRAMD1B
0	1.51569	0.789	0.244	0	Peritubular cells	GREB1L
0	1.45147	0.693	0.11	0	Peritubular cells	ARHGAP24
0	1.42212	0.787	0.151	0	Peritubular cells	SNED1
0	1.39347	0.829	0.301	0	Peritubular cells	MAGI2
0	1.35722	0.641	0.244	0	Peritubular cells	TXNRD1
0	1.30211	0.804	0.314	0	Peritubular cells	DST
0	1.27644	0.898	0.497	0	Peritubular cells	PTPRG
0	1.26033	0.348	0.084	0	Peritubular cells	HMGCS1
0	1.25104	0.749	0.239	0	Peritubular cells	RHOBTB3
0	1.24797	0.766	0.275	0	Peritubular cells	MAP3K5
0	1.21454	0.601	0.107	0	Peritubular cells	PDE8B
0	1.19224	0.65	0.128	0	Peritubular cells	TGFBR3
0	1.18123	0.677	0.189	0	Peritubular cells	PBX1
0	1.17411	0.51	0.048	0	Peritubular cells	PAPSS2
0	1.17255	0.729	0.165	0	Peritubular cells	EBF1
0	1.15949	0.479	0.143	0	Peritubular cells	GREB1
0	1.11103	0.788	0.406	0	Peritubular cells	PRKD1
0	1.11031	0.506	0.158	0	Peritubular cells	ATP13A3
0	1.09609	0.571	0.08	0	Peritubular cells	NCAM1
0	1.09195	0.699	0.211	0	Peritubular cells	ZEB2
0	1.07999	0.398	0.133	0	Peritubular cells	NAMPT
0	1.07019	0.584	0.101	0	Peritubular cells	PLA2G5
0	1.05665	0.6	0.087	0	Peritubular cells	AOX1
0	1.0546	0.734	0.336	0	Peritubular cells	LRMDA
0	1.03945	0.501	0.054	0	Peritubular cells	CCBE1
0	1.02299	0.73	0.243	0	Peritubular cells	PRKCA
0	1.0224	0.489	0.065	0	Peritubular cells	FHL2
0	1.02063	0.649	0.158	0	Peritubular cells	ZBTB16
0	0.997524	0.653	0.283	0	Peritubular cells	MAST4
0	0.99368	0.427	0.018	0	Peritubular cells	LHCGR
0	0.990056	0.526	0.055	0	Peritubular cells	IRAK3
0	0.989243	0.528	0.066	0	Peritubular cells	PDE7B
0	0.977912	0.789	0.313	0	Peritubular cells	FTX
0	0.976279	0.43	0.051	0	Peritubular cells	STAR
0	0.963284	0.392	0.043	0	Peritubular cells	STEAP4
0	0.952599	0.608	0.133	0	Peritubular cells	ADAMTS9-AS2
0	0.949333	0.455	0.08	0	Peritubular cells	C7
0	0.94563	0.589	0.076	0	Peritubular cells	ARHGEF28
0	0.938562	0.524	0.068	0	Peritubular cells	CPM
0	0.933297	0.568	0.163	0	Peritubular cells	PDZRN3
0	0.928763	0.525	0.134	0	Peritubular cells	SGK1
0	0.925394	0.518	0.106	0	Peritubular cells	MAMDC2
0	0.918985	0.713	0.326	0	Peritubular cells	FKBP5
0	0.916558	0.789	0.382	0	Peritubular cells	MIR99AHG
0	0.907437	0.676	0.335	0	Peritubular cells	GRID2
0	0.892442	0.605	0.159	0	Peritubular cells	PDZRN4
0	0.873828	0.676	0.209	0	Peritubular cells	INSR
0	0.850339	0.419	0.07	0	Peritubular cells	COBLL1
0	0.848117	0.425	0.073	0	Peritubular cells	CYP11A1
0	0.842188	0.422	0.056	0	Peritubular cells	GSTA1
0	0.836414	0.301	0.079	0	Peritubular cells	MSMO1
0	0.829835	0.73	0.294	0	Peritubular cells	RBMS3
0	0.818172	0.494	0.081	0	Peritubular cells	ABI3BP
0	0.806001	0.513	0.125	0	Peritubular cells	ASPH
0	0.802384	0.766	0.445	0	Peritubular cells	ARID1B
0	0.801535	0.609	0.212	0	Peritubular cells	RBM47
0	0.787487	0.7	0.291	0	Peritubular cells	FNDC3B
0	0.787361	0.492	0.154	0	Peritubular cells	THSD7A
0	0.78523	0.576	0.2	0	Peritubular cells	BMPR1B
0	0.783989	0.394	0.059	0	Peritubular cells	LDLR
0	0.782739	0.37	0.042	0	Peritubular cells	RNF152
0	0.772413	0.93	0.666	0	Peritubular cells	ZBTB20
0	0.771041	0.415	0.024	0	Peritubular cells	AC109472.1
0	0.768322	0.641	0.284	0	Peritubular cells	EPS8
0	0.763255	0.602	0.202	0	Peritubular cells	AL355612.1
0	0.762132	0.534	0.14	0	Peritubular cells	DAPK1
0	0.756887	0.719	0.366	0	Peritubular cells	TNRC6A
0	0.7469	0.374	0.024	0	Peritubular cells	SLC16A9
0	0.741073	0.587	0.193	0	Peritubular cells	RBPMS
0	0.738369	0.461	0.138	0	Peritubular cells	EFNA5
0	0.731679	0.585	0.16	0	Peritubular cells	NR2F2-AS1
0	0.725478	0.514	0.091	0	Peritubular cells	EGFR
0	0.720521	0.472	0.113	0	Peritubular cells	GLUL
0	0.718351	0.547	0.165	0	Peritubular cells	DOCK4
0	0.716838	0.725	0.35	0	Peritubular cells	PLXDC2
0	0.714731	0.487	0.128	0	Peritubular cells	LPIN1
0	0.714392	0.653	0.268	0	Peritubular cells	APBB2
0	0.713564	0.802	0.468	0	Peritubular cells	NFIA
0	0.702325	0.622	0.247	0	Peritubular cells	JAK1
0	0.695696	0.442	0.099	0	Peritubular cells	BCL6
0	0.695086	0.379	0.117	0	Peritubular cells	SOD2
5.61819e-274	0.693519	0.331	0.121	1.98541e-269	Peritubular cells	SH3BP5
0	0.693145	0.442	0.108	0	Peritubular cells	AFF2
0	0.693058	0.384	0.091	0	Peritubular cells	OSMR
0	0.691976	0.481	0.087	0	Peritubular cells	CPED1
0	0.69074	0.669	0.347	0	Peritubular cells	ROBO1
5.94816e-287	0.688843	0.654	0.353	2.10202e-282	Peritubular cells	ATRNL1
0	0.686002	0.715	0.33	0	Peritubular cells	MSI2
0	0.685977	0.902	0.574	0	Peritubular cells	ERBB4
0	0.685956	0.478	0.09	0	Peritubular cells	FIGN
0	0.685142	0.382	0.093	0	Peritubular cells	TXNIP
0	0.684932	0.516	0.161	0	Peritubular cells	FOXP2
2.94694e-183	0.68366	0.376	0.177	1.04142e-178	Peritubular cells	SGCZ
0	0.683074	0.78	0.353	0	Peritubular cells	SYNE1
3.76753e-277	0.669651	0.66	0.391	1.33141e-272	Peritubular cells	USP15
0	0.667179	0.426	0.062	0	Peritubular cells	CYB5A
0	0.666545	0.367	0.062	0	Peritubular cells	ALDH1L1
0	0.663884	0.395	0.089	0	Peritubular cells	SCARB1
0	0.663208	0.476	0.133	0	Peritubular cells	TMEM132C
0	0.66186	0.377	0.027	0	Peritubular cells	CCN5
0	0.657191	0.313	0.086	0	Peritubular cells	ACSS2
0	0.653437	0.64	0.311	0	Peritubular cells	FBXL7
0	0.647109	0.353	0.058	0	Peritubular cells	MGST1
6.37366e-296	0.642797	0.484	0.216	2.25239e-291	Peritubular cells	TBC1D8
0	0.640556	0.631	0.258	0	Peritubular cells	FTO
0	0.634587	0.457	0.107	0	Peritubular cells	MEIS2
0	0.629515	0.463	0.18	0	Peritubular cells	ZFAND5
6.32791e-268	0.626409	0.781	0.497	2.23622e-263	Peritubular cells	DLG2
0	0.625239	0.484	0.128	0	Peritubular cells	NCOA7
0	0.624299	0.482	0.166	0	Peritubular cells	RBMS1
0	0.624031	0.678	0.328	0	Peritubular cells	ZFPM2
0	0.617743	0.437	0.148	0	Peritubular cells	RERG
0	0.614193	0.378	0.07	0	Peritubular cells	AMMECR1
0	0.610856	0.643	0.329	0	Peritubular cells	PPP3CA
0	0.60963	0.452	0.127	0	Peritubular cells	PDCD4
0	0.608606	0.501	0.155	0	Peritubular cells	CFLAR
0	0.602069	0.55	0.219	0	Peritubular cells	ELMO1
0	0.599735	0.492	0.127	0	Peritubular cells	SH3PXD2B
0	0.598884	0.447	0.121	0	Peritubular cells	PIK3R1
2.66455e-301	0.594456	0.542	0.248	9.41625e-297	Peritubular cells	SOX5
0	0.593979	0.305	0.063	0	Peritubular cells	RMST
0	0.591107	0.468	0.105	0	Peritubular cells	FLRT2
0	0.590045	0.367	0.062	0	Peritubular cells	IRS2
0	0.589905	0.441	0.114	0	Peritubular cells	SLC38A2
0	0.586878	0.601	0.26	0	Peritubular cells	ITPR2
0	0.585554	0.39	0.08	0	Peritubular cells	CNN3
0	0.579886	0.353	0.084	0	Peritubular cells	ANKDD1A
0	0.567831	0.646	0.295	0	Peritubular cells	UTY
0	0.565637	0.514	0.216	0	Peritubular cells	FMNL2
0	0.562143	0.329	0.072	0	Peritubular cells	NRP1
0	0.561297	0.532	0.245	0	Peritubular cells	NEK7
0	0.557494	0.526	0.202	0	Peritubular cells	MBNL2
3.0403e-258	0.556492	0.682	0.395	1.07441e-253	Peritubular cells	IGF1R
0	0.55537	0.497	0.209	0	Peritubular cells	SIMC1
5.21549e-115	0.554013	0.333	0.173	1.8431e-110	Peritubular cells	LRP1B
0	0.54997	0.514	0.183	0	Peritubular cells	TRPS1
0	0.548628	0.389	0.081	0	Peritubular cells	GSTA4
0	0.54547	0.463	0.133	0	Peritubular cells	MTUS1
6.39083e-245	0.545239	0.616	0.327	2.25845e-240	Peritubular cells	PSD3
0	0.54381	0.438	0.107	0	Peritubular cells	AC108734.4
0	0.542469	0.376	0.066	0	Peritubular cells	DDR2
0	0.54172	0.593	0.288	0	Peritubular cells	ACACA
0	0.541682	0.354	0.054	0	Peritubular cells	COL4A4
6.96636e-217	0.54066	0.462	0.226	2.46184e-212	Peritubular cells	LINGO2
0	0.539967	0.645	0.279	0	Peritubular cells	PVT1
0	0.539389	0.296	0.052	0	Peritubular cells	SLC16A12
0	0.537681	0.357	0.086	0	Peritubular cells	DOCK10
0	0.528187	0.443	0.147	0	Peritubular cells	SMIM14
0	0.527541	0.35	0.075	0	Peritubular cells	OSBPL3
1.24636e-217	0.526001	0.498	0.257	4.40452e-213	Peritubular cells	FOXO3
6.31649e-191	0.524158	0.411	0.198	2.23218e-186	Peritubular cells	ELL2
0	0.521457	0.549	0.216	0	Peritubular cells	THOC2
0	0.519806	0.466	0.158	0	Peritubular cells	SMOC2
0	0.517216	0.414	0.148	0	Peritubular cells	RNF217
1.59206e-242	0.511361	0.752	0.49	5.62617e-238	Peritubular cells	STK3
8.24545e-296	0.511338	0.434	0.178	2.91386e-291	Peritubular cells	CPEB4
0	0.511143	0.327	0.069	0	Peritubular cells	P3H2
0	0.506593	0.509	0.214	0	Peritubular cells	TSPAN5
2.85942e-151	0.505794	0.427	0.229	1.01049e-146	Peritubular cells	ABCC1
0	0.503741	0.311	0.032	0	Peritubular cells	FOSL2
0	0.502257	0.293	0.067	0	Peritubular cells	AL109829.1
0	0.498997	0.391	0.114	0	Peritubular cells	TMTC1
0	0.498394	0.364	0.062	0	Peritubular cells	NR2F2
2.50308e-286	0.49641	0.408	0.154	8.84563e-282	Peritubular cells	MTCP1
5.07407e-273	0.495261	0.459	0.2	1.79313e-268	Peritubular cells	PPM1L
0	0.493921	0.362	0.119	0	Peritubular cells	SIK2
7.74647e-248	0.491647	0.558	0.278	2.73753e-243	Peritubular cells	SUGCT
0	0.49096	0.518	0.205	0	Peritubular cells	AFF1
1.3835e-299	0.488387	0.587	0.274	4.88914e-295	Peritubular cells	ABLIM1
1.60934e-263	0.487979	0.471	0.2	5.68724e-259	Peritubular cells	MAMLD1
1.14723e-272	0.48765	0.599	0.299	4.05419e-268	Peritubular cells	GOLGB1
0	0.487354	0.447	0.15	0	Peritubular cells	XYLT1
0	0.484149	0.421	0.15	0	Peritubular cells	GATA4
2.31924e-224	0.480892	0.912	0.744	8.19595e-220	Peritubular cells	AUTS2
3.31922e-56	0.48001	0.447	0.319	1.17298e-51	Peritubular cells	KCND2
0	0.477642	0.287	0.033	0	Peritubular cells	MOCOS
0	0.473003	0.354	0.12	0	Peritubular cells	MDM2
0	0.470981	0.289	0.057	0	Peritubular cells	AC004160.1
7.47027e-260	0.470878	0.522	0.247	2.63992e-255	Peritubular cells	ITSN1
5.16976e-258	0.470448	0.302	0.106	1.82694e-253	Peritubular cells	LSS
1.61618e-155	0.466927	0.287	0.126	5.71142e-151	Peritubular cells	CYP51A1
0	0.466197	0.384	0.109	0	Peritubular cells	GHR
1.16177e-287	0.464439	0.465	0.19	4.10557e-283	Peritubular cells	ANK2
0	0.463783	0.261	0.043	0	Peritubular cells	SLC40A1
1.1614e-278	0.463012	0.491	0.212	4.10428e-274	Peritubular cells	UST
0	0.462334	0.291	0.032	0	Peritubular cells	PRLR
2.11821e-252	0.462167	0.52	0.247	7.48555e-248	Peritubular cells	TACC1
5.13271e-250	0.46065	0.416	0.174	1.81385e-245	Peritubular cells	PCSK6
0	0.459306	0.305	0.061	0	Peritubular cells	ADCY3
3.82846e-99	0.459195	0.277	0.143	1.35294e-94	Peritubular cells	GALNT13
0	0.453608	0.319	0.047	0	Peritubular cells	C1R
0	0.45322	0.303	0.074	0	Peritubular cells	ERRFI1
0	0.453195	0.393	0.119	0	Peritubular cells	TANC1
5.1312e-184	0.452802	0.339	0.147	1.81332e-179	Peritubular cells	SAT1
2.61511e-293	0.452086	0.415	0.158	9.24155e-289	Peritubular cells	PWWP3B
1.71566e-281	0.450739	0.516	0.226	6.06297e-277	Peritubular cells	DNM3
0	0.450052	0.494	0.204	0	Peritubular cells	ECHDC2
8.13231e-199	0.448781	0.499	0.262	2.87388e-194	Peritubular cells	UVRAG
0	0.446404	0.364	0.109	0	Peritubular cells	PDGFC
8.1673e-217	0.444048	0.674	0.409	2.88624e-212	Peritubular cells	DDX17
4.50948e-289	0.443293	0.449	0.18	1.5936e-284	Peritubular cells	SH3RF3
0	0.442465	0.307	0.062	0	Peritubular cells	COL3A1
1.70814e-178	0.440002	0.412	0.202	6.03639e-174	Peritubular cells	GBE1
1.10211e-293	0.43969	0.413	0.158	3.89475e-289	Peritubular cells	FLNB
3.11112e-307	0.439374	0.312	0.099	1.09944e-302	Peritubular cells	EMB
0	0.435355	0.389	0.131	0	Peritubular cells	MORF4L2
6.17459e-215	0.435109	0.331	0.132	2.18204e-210	Peritubular cells	ABCA1
6.03533e-284	0.434009	0.433	0.176	2.13283e-279	Peritubular cells	NRIP1
0	0.430707	0.292	0.05	0	Peritubular cells	COL4A3
0	0.430698	0.301	0.052	0	Peritubular cells	EPHX1
1.89967e-167	0.430512	0.334	0.147	6.71323e-163	Peritubular cells	KLHL4
1.31661e-187	0.429577	0.693	0.437	4.65278e-183	Peritubular cells	PARD3B
5.03256e-178	0.429393	0.491	0.266	1.77846e-173	Peritubular cells	FOXO1
0	0.429181	0.325	0.074	0	Peritubular cells	MIRLET7BHG
0	0.428141	0.275	0.043	0	Peritubular cells	C2CD2
2.27217e-212	0.428101	0.522	0.269	8.02963e-208	Peritubular cells	TEAD1
1.53686e-197	0.427843	0.726	0.436	5.43111e-193	Peritubular cells	PARD3
0	0.427437	0.375	0.115	0	Peritubular cells	RAPGEF4
0	0.427213	0.384	0.117	0	Peritubular cells	ZNF521
6.43856e-133	0.425237	0.268	0.121	2.27532e-128	Peritubular cells	PDGFD
2.12759e-176	0.425228	0.644	0.394	7.51868e-172	Peritubular cells	EHBP1
2.82446e-228	0.42363	0.697	0.393	9.98135e-224	Peritubular cells	LPP
3.422e-278	0.422226	0.25	0.073	1.2093e-273	Peritubular cells	HMGCR
0	0.421738	0.321	0.065	0	Peritubular cells	PIR
0	0.421543	0.353	0.082	0	Peritubular cells	TNS1
3.93193e-220	0.420065	0.259	0.087	1.38951e-215	Peritubular cells	CLSTN2
9.2682e-210	0.418868	0.517	0.258	3.27529e-205	Peritubular cells	LSAMP
0	0.417603	0.279	0.045	0	Peritubular cells	GPR155
0	0.415795	0.345	0.095	0	Peritubular cells	SOAT1
4.22443e-215	0.414391	0.586	0.311	1.49287e-210	Peritubular cells	ATRX
4.44983e-224	0.414272	0.503	0.247	1.57253e-219	Peritubular cells	ITSN2
5.45801e-282	0.411774	0.467	0.198	1.92881e-277	Peritubular cells	SREBF2
2.99789e-281	0.4113	0.455	0.186	1.05942e-276	Peritubular cells	ITPR1
0	0.410523	0.33	0.069	0	Peritubular cells	SP100
1.88447e-246	0.410507	0.538	0.253	6.65954e-242	Peritubular cells	USP9Y
0	0.410295	0.321	0.072	0	Peritubular cells	ALPK1
1.31122e-252	0.410134	0.42	0.173	4.63372e-248	Peritubular cells	STAT3
9.49222e-246	0.407267	0.42	0.175	3.35445e-241	Peritubular cells	GRB14
9.8144e-177	0.406974	0.639	0.395	3.46831e-172	Peritubular cells	N4BP2L2
7.21357e-203	0.406465	0.357	0.148	2.5492e-198	Peritubular cells	CHST11
0	0.405744	0.35	0.103	0	Peritubular cells	ABCA9
0	0.403293	0.324	0.087	0	Peritubular cells	ANTXR2
0	0.402841	0.391	0.113	0	Peritubular cells	SLC23A2
0	0.4012	0.337	0.088	0	Peritubular cells	MITF
1.54953e-301	0.399984	0.28	0.083	5.4759e-297	Peritubular cells	FRMD3
0	0.399752	0.272	0.05	0	Peritubular cells	DHCR24
1.45507e-199	0.398377	0.375	0.164	5.14209e-195	Peritubular cells	ESR2
0	0.394236	0.341	0.098	0	Peritubular cells	SMAD3
1.45579e-255	0.390224	0.353	0.132	5.1446e-251	Peritubular cells	CLIC4
2.31503e-148	0.387382	0.749	0.533	8.18108e-144	Peritubular cells	MED13L
1.99592e-200	0.386406	0.552	0.281	7.05337e-196	Peritubular cells	WNK3
3.07993e-140	0.38529	0.578	0.37	1.08841e-135	Peritubular cells	AOPEP
1.07986e-161	0.385211	0.572	0.341	3.81612e-157	Peritubular cells	BABAM2
1.79387e-167	0.384066	0.571	0.338	6.33937e-163	Peritubular cells	ANKRD17
5.58202e-170	0.382663	0.571	0.325	1.97263e-165	Peritubular cells	FOXN3
3.22883e-190	0.38198	0.517	0.269	1.14104e-185	Peritubular cells	CELF2
0	0.38176	0.315	0.071	0	Peritubular cells	SLC8B1
0	0.37956	0.265	0.043	0	Peritubular cells	AJ009632.2
0	0.377339	0.268	0.042	0	Peritubular cells	ALKAL2
0	0.376957	0.385	0.131	0	Peritubular cells	STAT5B
1.96843e-161	0.374662	0.647	0.406	6.95623e-157	Peritubular cells	CHD9
1.12325e-175	0.37388	0.452	0.234	3.96947e-171	Peritubular cells	LRRFIP2
1.38052e-142	0.373551	0.678	0.453	4.87862e-138	Peritubular cells	BAZ2B
0	0.373235	0.339	0.102	0	Peritubular cells	ZHX2
0	0.373121	0.302	0.074	0	Peritubular cells	ABCA6
3.8047e-304	0.372979	0.28	0.082	1.34454e-299	Peritubular cells	LINC02237
9.29012e-175	0.372738	0.481	0.257	3.28303e-170	Peritubular cells	FAM214A
1.12278e-125	0.371268	0.669	0.46	3.96778e-121	Peritubular cells	MKLN1
1.59066e-239	0.369779	0.344	0.131	5.62122e-235	Peritubular cells	ARHGAP28
8.14388e-230	0.368596	0.355	0.141	2.87797e-225	Peritubular cells	PEG3
0	0.368333	0.32	0.098	0	Peritubular cells	ZC3H12C
1.21126e-160	0.36782	0.485	0.264	4.28046e-156	Peritubular cells	HUWE1
4.09162e-132	0.364473	0.423	0.237	1.44594e-127	Peritubular cells	RTN4
0	0.364152	0.294	0.063	0	Peritubular cells	TFPI
1.05703e-297	0.363533	0.354	0.12	3.73543e-293	Peritubular cells	CTIF
4.69221e-141	0.362181	0.511	0.293	1.65818e-136	Peritubular cells	EXT1
2.35865e-125	0.36167	0.577	0.368	8.33525e-121	Peritubular cells	MAGI1
2.06794e-213	0.358658	0.371	0.158	7.30789e-209	Peritubular cells	SPART
0	0.357639	0.316	0.084	0	Peritubular cells	ANTXR1
2.73746e-92	0.35633	0.652	0.494	9.67391e-88	Peritubular cells	SNHG14
1.77827e-137	0.355359	0.345	0.171	6.28423e-133	Peritubular cells	HIF1A
2.43168e-278	0.35393	0.325	0.108	8.59332e-274	Peritubular cells	DYNC1I1
4.0581e-196	0.352643	0.463	0.227	1.43409e-191	Peritubular cells	SEC31A
1.25199e-188	0.352498	0.444	0.218	4.4244e-184	Peritubular cells	FNBP4
1.07358e-165	0.350304	0.505	0.281	3.79391e-161	Peritubular cells	HNRNPH1
2.46908e-211	0.350125	0.435	0.196	8.72547e-207	Peritubular cells	UACA
1.10808e-264	0.348902	0.375	0.14	3.91584e-260	Peritubular cells	ACSS3
7.91851e-246	0.347539	0.379	0.15	2.79832e-241	Peritubular cells	MAP3K20
4.85227e-249	0.345769	0.353	0.133	1.71475e-244	Peritubular cells	RESF1
0	0.344085	0.304	0.079	0	Peritubular cells	SLC16A7
5.76125e-111	0.341067	0.586	0.399	2.03597e-106	Peritubular cells	REV3L
2.10096e-148	0.340518	0.578	0.342	7.4246e-144	Peritubular cells	AKAP9
7.73387e-119	0.338812	0.468	0.278	2.73307e-114	Peritubular cells	WDFY2
1.99768e-129	0.338563	0.46	0.266	7.0596e-125	Peritubular cells	HIPK3
2.06185e-180	0.337613	0.409	0.193	7.28639e-176	Peritubular cells	PAM
0	0.336835	0.262	0.05	0	Peritubular cells	TRIB2
0	0.336037	0.27	0.067	0	Peritubular cells	COQ8A
8.90951e-166	0.33461	0.566	0.307	3.14853e-161	Peritubular cells	CALD1
3.63253e-118	0.332208	0.405	0.225	1.2837e-113	Peritubular cells	MIR100HG
1.2753e-126	0.332047	0.439	0.247	4.50679e-122	Peritubular cells	PDLIM5
0	0.331237	0.25	0.058	0	Peritubular cells	MAN1C1
5.55493e-227	0.331055	0.358	0.141	1.96306e-222	Peritubular cells	RNF213
1.88361e-201	0.330629	0.347	0.142	6.65651e-197	Peritubular cells	TTTY14
7.59223e-175	0.329084	0.441	0.219	2.68302e-170	Peritubular cells	ABCA5
1.68624e-152	0.32886	0.265	0.109	5.959e-148	Peritubular cells	AASS
2.08146e-268	0.328556	0.29	0.092	7.35569e-264	Peritubular cells	HIVEP2
8.29458e-211	0.328318	0.277	0.099	2.93122e-206	Peritubular cells	SQSTM1
3.04455e-241	0.328223	0.374	0.146	1.07591e-236	Peritubular cells	TTC37
1.10249e-253	0.327587	0.301	0.099	3.8961e-249	Peritubular cells	HS6ST2
0	0.323887	0.267	0.071	0	Peritubular cells	REPS2
2.77993e-171	0.320078	0.386	0.182	9.824e-167	Peritubular cells	NT5DC1
0	0.318907	0.272	0.068	0	Peritubular cells	KLF9
2.38513e-94	0.318187	0.283	0.149	8.42882e-90	Peritubular cells	FDFT1
3.71693e-188	0.317502	0.364	0.16	1.31353e-183	Peritubular cells	SLC25A13
4.66387e-87	0.316955	0.818	0.71	1.64816e-82	Peritubular cells	FHIT
3.84994e-87	0.316462	0.391	0.237	1.36053e-82	Peritubular cells	ELOVL5
2.38064e-183	0.315637	0.381	0.171	8.41296e-179	Peritubular cells	CPQ
4.94031e-248	0.313332	0.314	0.11	1.74586e-243	Peritubular cells	AC016831.7
4.83971e-281	0.313182	0.311	0.101	1.7103e-276	Peritubular cells	KLHL24
0	0.312265	0.263	0.046	0	Peritubular cells	C1RL
1.84837e-78	0.311943	0.45	0.298	6.53195e-74	Peritubular cells	LINC00882
2.12621e-160	0.31075	0.325	0.145	7.51381e-156	Peritubular cells	AKAP7
3.19322e-135	0.310706	0.36	0.179	1.12845e-130	Peritubular cells	TPRG1
9.66022e-73	0.309997	0.509	0.361	3.41383e-68	Peritubular cells	PHF21A
6.13024e-261	0.309918	0.319	0.109	2.16636e-256	Peritubular cells	LINC01278
7.85982e-168	0.308902	0.282	0.114	2.77758e-163	Peritubular cells	SLC7A2
3.90274e-160	0.308686	0.407	0.202	1.37919e-155	Peritubular cells	UBAP1
5.26068e-70	0.308657	0.559	0.398	1.85907e-65	Peritubular cells	CACNA2D3
1.26064e-150	0.308227	0.345	0.163	4.45498e-146	Peritubular cells	PRKAR2B
4.08687e-18	0.307649	0.274	0.215	1.44426e-13	Peritubular cells	KCNIP4
0	0.307385	0.26	0.071	0	Peritubular cells	AL109930.1
5.12664e-227	0.306057	0.303	0.107	1.8117e-222	Peritubular cells	SLC9A9
3.63245e-172	0.305496	0.3	0.125	1.28367e-167	Peritubular cells	CCDC6
6.16917e-154	0.305398	0.296	0.127	2.18012e-149	Peritubular cells	CHSY1
1.29068e-105	0.305283	0.553	0.362	4.56114e-101	Peritubular cells	FNIP1
3.38108e-192	0.302908	0.372	0.161	1.19484e-187	Peritubular cells	SLC25A12
1.1591e-269	0.302282	0.286	0.089	4.09616e-265	Peritubular cells	RIN2
1.74697e-205	0.301995	0.345	0.141	6.17362e-201	Peritubular cells	ENOSF1
1.9377e-270	0.301823	0.264	0.078	6.84764e-266	Peritubular cells	OSMR-AS1
3.48681e-124	0.301799	0.438	0.242	1.2322e-119	Peritubular cells	SH3D19
1.71473e-184	0.300435	0.334	0.141	6.05968e-180	Peritubular cells	PLD1
1.29277e-110	0.300144	0.362	0.199	4.56853e-106	Peritubular cells	TRIM24
2.38746e-85	0.300051	0.492	0.321	8.43706e-81	Peritubular cells	ENAH
5.99464e-189	0.299216	0.33	0.136	2.11845e-184	Peritubular cells	HDAC8
5.20436e-138	0.298193	0.541	0.308	1.83917e-133	Peritubular cells	RUFY3
9.25443e-185	0.297814	0.261	0.095	3.27042e-180	Peritubular cells	F3
6.81965e-270	0.29738	0.268	0.082	2.41e-265	Peritubular cells	TBC1D2B
1.07264e-269	0.295956	0.288	0.091	3.79059e-265	Peritubular cells	SLC25A37
3.11627e-112	0.294425	0.463	0.274	1.10126e-107	Peritubular cells	ZNF516
1.10308e-141	0.29439	0.363	0.175	3.89819e-137	Peritubular cells	USP53
2.31559e-196	0.293746	0.267	0.097	8.18307e-192	Peritubular cells	ALDH3A2
6.53299e-118	0.293085	0.509	0.297	2.30869e-113	Peritubular cells	DPYD
2.56048e-170	0.293051	0.308	0.125	9.04848e-166	Peritubular cells	AC092691.1
8.1781e-86	0.292431	0.404	0.244	2.89006e-81	Peritubular cells	TENM3
1.51239e-106	0.291645	0.453	0.272	5.34463e-102	Peritubular cells	PSME4
2.08346e-185	0.291291	0.296	0.116	7.36273e-181	Peritubular cells	SYTL4
2.07762e-181	0.289253	0.401	0.183	7.3421e-177	Peritubular cells	IGF2R
7.01049e-91	0.288733	0.482	0.316	2.47744e-86	Peritubular cells	SOS1
4.66727e-206	0.288702	0.325	0.127	1.64937e-201	Peritubular cells	GK5
1.14878e-251	0.288013	0.291	0.096	4.05968e-247	Peritubular cells	RPS4Y1
7.28539e-225	0.287836	0.301	0.108	2.57458e-220	Peritubular cells	HSPA12A
5.04643e-225	0.287779	0.281	0.096	1.78336e-220	Peritubular cells	ADAMTS12
1.00298e-170	0.287128	0.346	0.154	3.54443e-166	Peritubular cells	NFE2L2
8.34309e-110	0.28594	0.491	0.301	2.94836e-105	Peritubular cells	HNRNPC
5.3204e-211	0.284645	0.254	0.086	1.88017e-206	Peritubular cells	BBS2
2.05707e-117	0.283028	0.427	0.237	7.26948e-113	Peritubular cells	APPL2
8.19751e-85	0.282213	0.525	0.355	2.89692e-80	Peritubular cells	CDK13
1.17913e-218	0.281877	0.273	0.094	4.16692e-214	Peritubular cells	ABO
2.6373e-122	0.280668	0.332	0.165	9.31995e-118	Peritubular cells	BNIP3L
3.03461e-188	0.280375	0.297	0.116	1.0724e-183	Peritubular cells	ATP8A1
2.28416e-153	0.280162	0.322	0.143	8.07198e-149	Peritubular cells	USP13
5.89022e-162	0.279728	0.313	0.132	2.08154e-157	Peritubular cells	PLPP3
2.62248e-145	0.278674	0.527	0.294	9.26759e-141	Peritubular cells	SRRM2
8.92338e-85	0.278272	0.565	0.391	3.15343e-80	Peritubular cells	DDX5
1.64798e-203	0.277347	0.267	0.094	5.82379e-199	Peritubular cells	TCEAL4
4.73675e-82	0.276924	0.371	0.221	1.67392e-77	Peritubular cells	LINC00894
5.27314e-151	0.276028	0.325	0.148	1.86347e-146	Peritubular cells	PCGF5
1.87805e-112	0.275358	0.28	0.132	6.63685e-108	Peritubular cells	IL1R1
3.80194e-118	0.275278	0.406	0.223	1.34357e-113	Peritubular cells	RAB1A
2.60953e-94	0.275	0.425	0.248	9.22181e-90	Peritubular cells	SMARCA1
3.62372e-129	0.274701	0.383	0.192	1.28059e-124	Peritubular cells	NHS
4.66125e-136	0.274138	0.289	0.129	1.64724e-131	Peritubular cells	SOBP
0	0.273213	0.254	0.059	0	Peritubular cells	AL445426.1
8.14949e-148	0.271011	0.331	0.153	2.87995e-143	Peritubular cells	USP3
1.91386e-89	0.268602	0.263	0.132	6.76338e-85	Peritubular cells	PLCL1
6.03436e-80	0.267443	0.501	0.34	2.13248e-75	Peritubular cells	CEP85L
2.422e-105	0.266238	0.496	0.304	8.55912e-101	Peritubular cells	RBM39
2.83089e-82	0.265902	0.423	0.268	1.00041e-77	Peritubular cells	CRADD
1.86353e-148	0.265048	0.293	0.127	6.58552e-144	Peritubular cells	ECE1
3.17848e-192	0.263725	0.282	0.106	1.12324e-187	Peritubular cells	GNG12
1.56603e-99	0.262525	0.527	0.329	5.53419e-95	Peritubular cells	MBNL1
3.05495e-76	0.262299	0.482	0.32	1.07959e-71	Peritubular cells	UBE2H
3.04941e-98	0.261162	0.288	0.147	1.07763e-93	Peritubular cells	MAPK14
1.13372e-85	0.259794	0.575	0.388	4.00644e-81	Peritubular cells	TCF4
1.01871e-164	0.259711	0.288	0.117	3.6e-160	Peritubular cells	MEF2C
3.20205e-200	0.259265	0.28	0.102	1.13157e-195	Peritubular cells	MLXIP
3.40009e-123	0.259262	0.386	0.204	1.20156e-118	Peritubular cells	AC118549.1
1.3631e-118	0.259232	0.359	0.185	4.81706e-114	Peritubular cells	ETV6
1.01098e-158	0.259111	0.283	0.116	3.5727e-154	Peritubular cells	SAMHD1
7.99493e-97	0.258146	0.359	0.196	2.82533e-92	Peritubular cells	PELI2
2.74528e-156	0.257718	0.335	0.15	9.70156e-152	Peritubular cells	STAG2
8.50037e-136	0.257604	0.328	0.155	3.00394e-131	Peritubular cells	IL6ST
2.06938e-124	0.257337	0.332	0.163	7.31298e-120	Peritubular cells	MPZL1
2.98259e-116	0.255027	0.385	0.208	1.05402e-111	Peritubular cells	TMEM245
6.40285e-69	0.254866	0.303	0.176	2.2627e-64	Peritubular cells	ACSL4
6.78333e-73	0.254482	0.518	0.343	2.39716e-68	Peritubular cells	FGD4
1.98961e-107	0.254288	0.296	0.148	7.03109e-103	Peritubular cells	NDFIP1
4.23643e-78	0.254244	0.492	0.331	1.49711e-73	Peritubular cells	DCAF6
1.17705e-130	0.253103	0.381	0.19	4.15959e-126	Peritubular cells	ADGRL2
1.3078e-145	0.253015	0.285	0.122	4.62162e-141	Peritubular cells	MINDY4
3.80867e-76	0.252863	0.518	0.351	1.34595e-71	Peritubular cells	MRTFA
2.72983e-94	0.252274	0.322	0.174	9.64694e-90	Peritubular cells	PPP4R4
6.02278e-60	0.25197	0.451	0.315	2.12839e-55	Peritubular cells	CHD2
3.53401e-140	0.251418	0.298	0.134	1.24888e-135	Peritubular cells	AF117829.1
4.67891e-117	0.251264	0.355	0.179	1.65348e-112	Peritubular cells	STARD13
1.1475e-101	0.250684	0.347	0.186	4.05515e-97	Peritubular cells	ZNF462
0	2.03609	0.455	0.234	0	Spermatocytes	ZNF385D
0	1.79424	0.8	0.229	0	Spermatocytes	ANKRD30A
0	1.72387	0.726	0.248	0	Spermatocytes	CFAP299
0	1.63655	0.8	0.341	0	Spermatocytes	ANKRD7
0	1.59318	0.864	0.343	0	Spermatocytes	AGBL4
0	1.47299	0.847	0.54	0	Spermatocytes	SPAG16
0	1.44529	0.545	0.125	0	Spermatocytes	ANKRD30B
0	1.33616	0.778	0.34	0	Spermatocytes	TEX41
0	1.33179	0.768	0.225	0	Spermatocytes	LINC01606
0	1.31332	0.453	0.195	0	Spermatocytes	AC116362.1
0	1.3094	0.845	0.439	0	Spermatocytes	CCDC144A
0	1.30666	0.623	0.118	0	Spermatocytes	LINC01206
0	1.30157	0.714	0.22	0	Spermatocytes	STRBP
0	1.30083	0.705	0.202	0	Spermatocytes	ANKRD36
0	1.27458	0.69	0.199	0	Spermatocytes	AC009264.1
0	1.21524	0.623	0.098	0	Spermatocytes	SLCO6A1
0	1.19413	0.702	0.143	0	Spermatocytes	C14orf39
0	1.17872	0.633	0.147	0	Spermatocytes	LINC02109
0	1.16837	0.779	0.34	0	Spermatocytes	DLGAP2
0	1.15561	0.555	0.108	0	Spermatocytes	AC004936.1
0	1.14654	0.551	0.177	0	Spermatocytes	SYCP1
0	1.1405	0.63	0.083	0	Spermatocytes	ANKRD62
0	1.0538	0.586	0.149	0	Spermatocytes	C2orf88
0	1.0398	0.535	0.071	0	Spermatocytes	AC126323.2
0	1.03811	0.707	0.323	0	Spermatocytes	PPM1E
0	1.01625	0.69	0.156	0	Spermatocytes	SHCBP1L
0	1.0043	0.669	0.177	0	Spermatocytes	ZPBP
0	0.998567	0.59	0.121	0	Spermatocytes	RFX4
0	0.992632	0.704	0.27	0	Spermatocytes	CSMD3
0	0.987251	0.718	0.261	0	Spermatocytes	CCDC7
0	0.978376	0.678	0.289	0	Spermatocytes	CAMKMT
0	0.961191	0.697	0.276	0	Spermatocytes	ATRNL1
0	0.960756	0.559	0.121	0	Spermatocytes	LINC00466
0	0.955525	0.635	0.125	0	Spermatocytes	SLC4A8
0	0.953756	0.295	0.057	0	Spermatocytes	MIR4713HG
0	0.951182	0.639	0.108	0	Spermatocytes	CCDC36
0	0.947147	0.611	0.15	0	Spermatocytes	LEKR1
0	0.943324	0.729	0.268	0	Spermatocytes	TPTE
0	0.935799	0.882	0.663	0	Spermatocytes	TTC28
0	0.934625	0.712	0.277	0	Spermatocytes	PDE3B
0	0.929426	0.383	0.07	0	Spermatocytes	MGAT4D
0	0.929001	0.707	0.294	0	Spermatocytes	STK33
0	0.92585	0.479	0.075	0	Spermatocytes	MIR548A1HG
0	0.923688	0.642	0.208	0	Spermatocytes	NOVA1
0	0.909333	0.774	0.398	0	Spermatocytes	SETX
0	0.891727	0.715	0.262	0	Spermatocytes	RALGPS2
0	0.883516	0.66	0.213	0	Spermatocytes	GLCCI1
0	0.883168	0.5	0.083	0	Spermatocytes	POTEC
0	0.866745	0.523	0.138	0	Spermatocytes	LINC00879
0	0.860839	0.614	0.147	0	Spermatocytes	COX7B2
0	0.856828	0.685	0.267	0	Spermatocytes	TMEM232
0	0.856368	0.764	0.353	0	Spermatocytes	HULC
0	0.854173	0.792	0.332	0	Spermatocytes	CCDC88A
0	0.846637	0.469	0.09	0	Spermatocytes	ADD3-AS1
0	0.83611	0.542	0.105	0	Spermatocytes	AC026495.2
0	0.829442	0.392	0.066	0	Spermatocytes	ADAM2
0	0.829294	0.68	0.227	0	Spermatocytes	IFT88
0	0.815258	0.669	0.25	0	Spermatocytes	TBC1D32
0	0.807609	0.526	0.117	0	Spermatocytes	LINC01098
0	0.804501	0.64	0.178	0	Spermatocytes	AK9
0	0.801605	0.503	0.064	0	Spermatocytes	AC092683.1
0	0.794788	0.551	0.093	0	Spermatocytes	HORMAD2
0	0.787758	0.525	0.061	0	Spermatocytes	CLCA4-AS1
0	0.776511	0.407	0.053	0	Spermatocytes	CYP19A1
0	0.769235	0.636	0.229	0	Spermatocytes	STPG2
0	0.769165	0.776	0.369	0	Spermatocytes	SCAPER
0	0.768714	0.655	0.235	0	Spermatocytes	DCDC1
0	0.768031	0.534	0.116	0	Spermatocytes	ANKRD36B
0	0.767294	0.596	0.176	0	Spermatocytes	MEIKIN
0	0.766076	0.546	0.117	0	Spermatocytes	DPY19L2
0	0.760197	0.643	0.219	0	Spermatocytes	PCBP3
0	0.754101	0.598	0.167	0	Spermatocytes	AC021723.2
0	0.753716	0.515	0.09	0	Spermatocytes	AL390860.1
0	0.752651	0.825	0.517	0	Spermatocytes	VPS13B
0	0.751773	0.735	0.342	0	Spermatocytes	KIAA1328
0	0.750048	0.443	0.065	0	Spermatocytes	LINC02367
0	0.747352	0.594	0.172	0	Spermatocytes	MPP6
0	0.745189	0.593	0.135	0	Spermatocytes	SPATA22
0	0.742287	0.606	0.189	0	Spermatocytes	FGFR1OP
0	0.737836	0.507	0.097	0	Spermatocytes	ERI2
0	0.732175	0.601	0.196	0	Spermatocytes	KHDRBS3
0	0.731094	0.524	0.118	0	Spermatocytes	DNHD1
0	0.73098	0.586	0.193	0	Spermatocytes	CEP128
0	0.727928	0.537	0.256	0	Spermatocytes	TAFA2
0	0.726115	0.499	0.077	0	Spermatocytes	ANKRD30BL
0	0.725458	0.548	0.151	0	Spermatocytes	AC010343.3
0	0.72208	0.674	0.295	0	Spermatocytes	LINC00342
0	0.720862	0.349	0.036	0	Spermatocytes	AP000550.1
0	0.71932	0.672	0.31	0	Spermatocytes	LINC01572
0	0.715565	0.618	0.337	0	Spermatocytes	SCMH1
0	0.708989	0.552	0.162	0	Spermatocytes	SLC12A6
0	0.708747	0.742	0.415	0	Spermatocytes	MLLT10
0	0.700577	0.398	0.095	0	Spermatocytes	F11-AS1
0	0.690627	0.484	0.082	0	Spermatocytes	CFAP46
0	0.687609	0.695	0.391	0	Spermatocytes	ERBIN
0	0.687114	0.569	0.2	0	Spermatocytes	POLK
0	0.686541	0.592	0.254	0	Spermatocytes	KCND2
0	0.681377	0.553	0.166	0	Spermatocytes	MARCH3
0	0.679165	0.447	0.066	0	Spermatocytes	AL137856.1
0	0.67547	0.457	0.092	0	Spermatocytes	PIWIL1
0	0.673925	0.588	0.173	0	Spermatocytes	TSGA10
0	0.672693	0.402	0.086	0	Spermatocytes	SPAG6
0	0.667583	0.616	0.195	0	Spermatocytes	RNF17
0	0.664702	0.357	0.052	0	Spermatocytes	CCDC38
0	0.662842	0.559	0.143	0	Spermatocytes	BRDT
0	0.662785	0.489	0.138	0	Spermatocytes	TTC29
0	0.661535	0.491	0.134	0	Spermatocytes	ZCWPW2
0	0.660029	0.393	0.095	0	Spermatocytes	LINC01818
0	0.651749	0.576	0.172	0	Spermatocytes	SYCP2
0	0.651107	0.392	0.067	0	Spermatocytes	AC097521.1
0	0.650264	0.535	0.149	0	Spermatocytes	SMURF1
0	0.649335	0.474	0.08	0	Spermatocytes	SLC9B1
0	0.649316	0.732	0.37	0	Spermatocytes	ANKRD36C
0	0.644472	0.362	0.109	0	Spermatocytes	SLC9C1
0	0.643757	0.56	0.235	0	Spermatocytes	POT1-AS1
0	0.643597	0.426	0.12	0	Spermatocytes	SNAP91
0	0.638865	0.824	0.586	0	Spermatocytes	MYO9A
0	0.633427	0.647	0.371	0	Spermatocytes	FUT8
0	0.632904	0.599	0.213	0	Spermatocytes	ATG10
0	0.630566	0.704	0.414	0	Spermatocytes	NRXN1
0	0.62751	0.532	0.135	0	Spermatocytes	IFT122
0	0.626122	0.448	0.068	0	Spermatocytes	AL158154.3
0	0.624631	0.722	0.364	0	Spermatocytes	AC011246.1
0	0.621977	0.32	0.077	0	Spermatocytes	EFCAB5
0	0.619206	0.534	0.134	0	Spermatocytes	ART3
0	0.615925	0.728	0.379	0	Spermatocytes	DNAH14
0	0.61563	0.441	0.083	0	Spermatocytes	NRG4
0	0.614217	0.499	0.134	0	Spermatocytes	KIF9-AS1
0	0.611026	0.498	0.105	0	Spermatocytes	REXO5
0	0.610996	0.493	0.141	0	Spermatocytes	NEK10
0	0.61085	0.657	0.286	0	Spermatocytes	PABPC1
0	0.609909	0.568	0.171	0	Spermatocytes	CNTRL
0	0.609873	0.474	0.325	0	Spermatocytes	RIMS2
0	0.606594	0.699	0.454	0	Spermatocytes	DLG2
0	0.606546	0.62	0.224	0	Spermatocytes	PHF7
0	0.605619	0.49	0.09	0	Spermatocytes	Z94721.1
0	0.604004	0.654	0.301	0	Spermatocytes	PTBP2
0	0.600658	0.662	0.274	0	Spermatocytes	TPST1
0	0.599568	0.46	0.087	0	Spermatocytes	CCDC158
0	0.597064	0.489	0.125	0	Spermatocytes	ARRDC3-AS1
0	0.592559	0.432	0.065	0	Spermatocytes	AC005323.2
0	0.592353	0.6	0.216	0	Spermatocytes	DZIP3
0	0.592159	0.433	0.088	0	Spermatocytes	EXD1
0	0.590983	0.531	0.202	0	Spermatocytes	PLEKHB2
0	0.590627	0.492	0.114	0	Spermatocytes	TPTE2
0	0.590376	0.645	0.277	0	Spermatocytes	USP32
0	0.589786	0.457	0.059	0	Spermatocytes	KCTD19
0	0.589677	0.462	0.137	0	Spermatocytes	DNAH8
0	0.588713	0.435	0.08	0	Spermatocytes	INTS6-AS1
0	0.586941	0.412	0.067	0	Spermatocytes	CATSPERG
0	0.58679	0.62	0.249	0	Spermatocytes	CCDC171
0	0.583503	0.538	0.171	0	Spermatocytes	AC025159.1
0	0.582297	0.702	0.376	0	Spermatocytes	SETD2
0	0.581754	0.419	0.082	0	Spermatocytes	AC097460.1
0	0.579774	0.426	0.134	0	Spermatocytes	CATSPERE
0	0.57933	0.436	0.095	0	Spermatocytes	CCDC15
0	0.579069	0.604	0.236	0	Spermatocytes	AC138627.1
0	0.577202	0.632	0.295	0	Spermatocytes	METTL15
0	0.575667	0.516	0.129	0	Spermatocytes	ZNF318
0	0.575213	0.614	0.263	0	Spermatocytes	FGF14
0	0.574783	0.474	0.152	0	Spermatocytes	DNAH12
0	0.573713	0.448	0.087	0	Spermatocytes	GLIPR1L2
0	0.573436	0.461	0.133	0	Spermatocytes	FSIP2
0	0.573136	0.605	0.337	0	Spermatocytes	COMMD10
0	0.571981	0.664	0.357	0	Spermatocytes	AC007319.1
0	0.570755	0.873	0.684	0	Spermatocytes	MACROD2
0	0.566215	0.376	0.052	0	Spermatocytes	PPP1R1C
0	0.565727	0.467	0.127	0	Spermatocytes	CARD18
0	0.564607	0.564	0.184	0	Spermatocytes	IQCH
0	0.560678	0.598	0.235	0	Spermatocytes	KANSL1L
0	0.559996	0.631	0.275	0	Spermatocytes	LINC01524
0	0.558066	0.43	0.104	0	Spermatocytes	AC021086.1
0	0.555834	0.34	0.058	0	Spermatocytes	LINC00964
0	0.554736	0.436	0.084	0	Spermatocytes	PPP1R42
0	0.55334	0.406	0.061	0	Spermatocytes	DNAI1
0	0.551416	0.446	0.093	0	Spermatocytes	ENTHD1
0	0.550612	0.472	0.178	0	Spermatocytes	AC004949.1
0	0.549806	0.532	0.216	0	Spermatocytes	LARP1B
0	0.54764	0.463	0.122	0	Spermatocytes	LRRIQ3
0	0.545079	0.535	0.183	0	Spermatocytes	EFCAB2
0	0.543932	0.879	0.757	0	Spermatocytes	IMMP2L
0	0.54344	0.538	0.182	0	Spermatocytes	RALGPS1
0	0.543157	0.418	0.066	0	Spermatocytes	NEU3
0	0.543095	0.522	0.17	0	Spermatocytes	AC005670.3
0	0.542062	0.372	0.106	0	Spermatocytes	ZNF608
0	0.540364	0.38	0.069	0	Spermatocytes	AL590705.1
0	0.540148	0.689	0.386	0	Spermatocytes	NBEA
0	0.537768	0.44	0.125	0	Spermatocytes	LINC02241
0	0.534215	0.387	0.073	0	Spermatocytes	AL096803.2
0	0.533807	0.348	0.092	0	Spermatocytes	MARCH11
0	0.533602	0.474	0.124	0	Spermatocytes	CBX5
0	0.533232	0.721	0.407	0	Spermatocytes	SOX6
0	0.532651	0.458	0.156	0	Spermatocytes	HIST1H2AA
0	0.530659	0.54	0.192	0	Spermatocytes	CCDC14
0	0.526678	0.495	0.146	0	Spermatocytes	DNAJC10
0	0.525704	0.466	0.111	0	Spermatocytes	SPDYA
0	0.525554	0.479	0.184	0	Spermatocytes	ANKRD18A
0	0.523128	0.393	0.065	0	Spermatocytes	NOX5
0	0.522732	0.536	0.236	0	Spermatocytes	AC109466.1
0	0.52268	0.355	0.074	0	Spermatocytes	AC015631.1
0	0.520815	0.527	0.178	0	Spermatocytes	SPAG17
0	0.519049	0.404	0.084	0	Spermatocytes	AP001341.1
0	0.517815	0.451	0.103	0	Spermatocytes	AC034114.2
0	0.517554	0.342	0.129	0	Spermatocytes	AADACL2-AS1
0	0.516714	0.447	0.095	0	Spermatocytes	GDPD4
0	0.514061	0.604	0.302	0	Spermatocytes	BBS9
0	0.513701	0.482	0.219	0	Spermatocytes	ADGRB3
0	0.513603	0.473	0.135	0	Spermatocytes	MORC1
0	0.513073	0.28	0.042	0	Spermatocytes	HNF4G
0	0.510633	0.411	0.082	0	Spermatocytes	DNAAF1
0	0.510107	0.441	0.181	0	Spermatocytes	DNM3
0	0.509957	0.398	0.08	0	Spermatocytes	CD163L1
0	0.508006	0.592	0.259	0	Spermatocytes	DLEU2
0	0.507856	0.336	0.115	0	Spermatocytes	LINC01297
0	0.507248	0.432	0.149	0	Spermatocytes	SMC1B
0	0.506753	0.65	0.389	0	Spermatocytes	LINC01473
0	0.506286	0.496	0.183	0	Spermatocytes	SFMBT1
0	0.505915	0.368	0.075	0	Spermatocytes	AC024901.1
0	0.505194	0.354	0.059	0	Spermatocytes	BX664727.3
0	0.504723	0.509	0.161	0	Spermatocytes	KNL1
0	0.504318	0.426	0.082	0	Spermatocytes	HORMAD1
0	0.504032	0.451	0.153	0	Spermatocytes	FAM184A
0	0.501808	0.389	0.1	0	Spermatocytes	AC097512.1
0	0.501073	0.439	0.119	0	Spermatocytes	GRK3
0	0.499783	0.562	0.273	0	Spermatocytes	BMP2K
0	0.49808	0.684	0.375	0	Spermatocytes	NFAT5
0	0.497754	0.362	0.068	0	Spermatocytes	LINC02228
0	0.496854	0.479	0.154	0	Spermatocytes	SPATA17
0	0.496486	0.445	0.101	0	Spermatocytes	C5orf47
0	0.494304	0.427	0.143	0	Spermatocytes	AC090825.1
0	0.49366	0.733	0.424	0	Spermatocytes	RABGAP1L
0	0.493462	0.378	0.088	0	Spermatocytes	SLC2A14
0	0.491324	0.365	0.037	0	Spermatocytes	GBX1
0	0.491255	0.364	0.089	0	Spermatocytes	LINC02211
0	0.490881	0.408	0.146	0	Spermatocytes	AKAP6
0	0.489742	0.539	0.214	0	Spermatocytes	LCORL
0	0.488942	0.442	0.122	0	Spermatocytes	CEP44
0	0.485429	0.597	0.28	0	Spermatocytes	MIB1
0	0.485087	0.484	0.155	0	Spermatocytes	CFAP70
0	0.484323	0.388	0.1	0	Spermatocytes	CPEB2-DT
0	0.482792	0.313	0.072	0	Spermatocytes	POTEI
0	0.481469	0.432	0.113	0	Spermatocytes	RBM46
0	0.480294	0.641	0.348	0	Spermatocytes	TMCC1
0	0.48008	0.37	0.063	0	Spermatocytes	LEF1-AS1
0	0.478918	0.385	0.209	0	Spermatocytes	AC104664.1
0	0.477847	0.496	0.177	0	Spermatocytes	TNRC6C
0	0.476511	0.367	0.059	0	Spermatocytes	AL034417.2
0	0.476093	0.701	0.364	0	Spermatocytes	AC011287.1
0	0.473821	0.415	0.126	0	Spermatocytes	FRG1-DT
0	0.473597	0.438	0.114	0	Spermatocytes	CEP70
0	0.47343	0.421	0.135	0	Spermatocytes	NR2F1-AS1
0	0.473108	0.441	0.197	0	Spermatocytes	MYT1L
0	0.4731	0.45	0.113	0	Spermatocytes	LRRC36
0	0.472579	0.457	0.152	0	Spermatocytes	FAM106A
0	0.471339	0.364	0.044	0	Spermatocytes	TESMIN
0	0.469899	0.589	0.284	0	Spermatocytes	KDM5B
0	0.469331	0.377	0.121	0	Spermatocytes	CHSY3
0	0.465578	0.283	0.053	0	Spermatocytes	AC108690.1
0	0.462178	0.391	0.123	0	Spermatocytes	C2CD6
0	0.462063	0.628	0.355	0	Spermatocytes	MAPK8
0	0.46068	0.452	0.141	0	Spermatocytes	RFX2
0	0.460495	0.523	0.216	0	Spermatocytes	SNX14
0	0.459593	0.361	0.062	0	Spermatocytes	MSH4
0	0.459407	0.439	0.133	0	Spermatocytes	UBN1
0	0.458568	0.373	0.087	0	Spermatocytes	CLGN
0	0.458328	0.527	0.241	0	Spermatocytes	CLOCK
0	0.457255	0.451	0.135	0	Spermatocytes	EEF1AKMT2
0	0.457087	0.332	0.057	0	Spermatocytes	AC079062.1
0	0.457072	0.441	0.121	0	Spermatocytes	TOP2A
0	0.456385	0.272	0.022	0	Spermatocytes	AL161912.1
0	0.456357	0.415	0.134	0	Spermatocytes	PILRB
0	0.454786	0.343	0.107	0	Spermatocytes	ZCWPW1
0	0.45292	0.305	0.04	0	Spermatocytes	MIR4500HG
0	0.452694	0.64	0.356	0	Spermatocytes	DOCK3
0	0.45223	0.416	0.11	0	Spermatocytes	FBXO31
0	0.452097	0.327	0.141	0	Spermatocytes	KCNQ1OT1
0	0.451533	0.411	0.103	0	Spermatocytes	CFAP43
0	0.448594	0.32	0.044	0	Spermatocytes	CERS3
0	0.448557	0.426	0.115	0	Spermatocytes	PPP4R4
0	0.447948	0.455	0.142	0	Spermatocytes	XRRA1
0	0.447305	0.334	0.178	0	Spermatocytes	TPK1
0	0.44725	0.634	0.314	0	Spermatocytes	RASAL2
0	0.44535	0.325	0.076	0	Spermatocytes	ANKRD18B
0	0.445226	0.556	0.263	0	Spermatocytes	NUBPL
0	0.445022	0.538	0.24	0	Spermatocytes	AL691420.1
0	0.444934	0.382	0.08	0	Spermatocytes	SLC6A16
0	0.444351	0.375	0.079	0	Spermatocytes	LINC02235
0	0.442719	0.394	0.103	0	Spermatocytes	CEP57L1
0	0.440967	0.339	0.054	0	Spermatocytes	INO80E
0	0.440533	0.387	0.143	0	Spermatocytes	LINC01725
0	0.43994	0.411	0.11	0	Spermatocytes	TMEM38B
0	0.439491	0.456	0.151	0	Spermatocytes	VKORC1L1
0	0.437111	0.452	0.162	0	Spermatocytes	H2AFJ
0	0.434916	0.293	0.057	0	Spermatocytes	LINC00348
0	0.43446	0.478	0.177	0	Spermatocytes	CRY1
0	0.434328	0.417	0.131	0	Spermatocytes	GGA1
0	0.433946	0.433	0.13	0	Spermatocytes	BRD8
0	0.433124	0.426	0.138	0	Spermatocytes	ANXA4
0	0.432338	0.399	0.254	0	Spermatocytes	GULP1
0	0.432144	0.312	0.111	0	Spermatocytes	CRB1
0	0.432093	0.371	0.117	0	Spermatocytes	MEI1
0	0.429615	0.321	0.041	0	Spermatocytes	SPAG5-AS1
0	0.428847	0.326	0.067	0	Spermatocytes	LEF1
0	0.428088	0.491	0.185	0	Spermatocytes	C11orf49
0	0.428084	0.328	0.055	0	Spermatocytes	SLC26A8
0	0.427379	0.285	0.047	0	Spermatocytes	ADAM18
0	0.425749	0.363	0.067	0	Spermatocytes	SYCE1
0	0.425424	0.369	0.086	0	Spermatocytes	GIHCG
0	0.424612	0.632	0.335	0	Spermatocytes	SPAG9
0	0.423683	0.458	0.159	0	Spermatocytes	NUP210L
0	0.423592	0.398	0.215	0	Spermatocytes	CENPP
0	0.423502	0.299	0.12	0	Spermatocytes	AC083870.1
0	0.423317	0.434	0.158	0	Spermatocytes	FANK1
0	0.422996	0.289	0.023	0	Spermatocytes	ONECUT1
0	0.421694	0.4	0.106	0	Spermatocytes	C12orf40
0	0.421481	0.568	0.274	0	Spermatocytes	SPATA5
0	0.419269	0.325	0.048	0	Spermatocytes	WFDC3
0	0.418598	0.501	0.233	0	Spermatocytes	SKAP2
0	0.418041	0.412	0.113	0	Spermatocytes	LDHC
0	0.417731	0.378	0.145	0	Spermatocytes	CCDC73
0	0.417376	0.381	0.147	0	Spermatocytes	AC016687.3
0	0.417373	0.37	0.084	0	Spermatocytes	HSF5
0	0.417369	0.33	0.073	0	Spermatocytes	OVCH1-AS1
0	0.417332	0.442	0.163	0	Spermatocytes	CEP126
0	0.417158	0.408	0.137	0	Spermatocytes	AL157911.1
0	0.417079	0.447	0.174	0	Spermatocytes	SYN2
0	0.416547	0.44	0.147	0	Spermatocytes	LINC00470
0	0.4164	0.393	0.1	0	Spermatocytes	CCT6B
0	0.415263	0.584	0.417	0	Spermatocytes	SDK1
0	0.414329	0.354	0.072	0	Spermatocytes	FBXO15
0	0.413396	0.345	0.065	0	Spermatocytes	ZBTB44-DT
0	0.412616	0.362	0.095	0	Spermatocytes	AC092535.4
0	0.410859	0.757	0.494	0	Spermatocytes	NR6A1
0	0.410652	0.348	0.082	0	Spermatocytes	ZBED9
0	0.409982	0.347	0.072	0	Spermatocytes	PYGO1
0	0.40968	0.747	0.492	0	Spermatocytes	ASH1L
0	0.40934	0.401	0.106	0	Spermatocytes	MEIOC
0	0.406748	0.678	0.39	0	Spermatocytes	PCM1
0	0.406527	0.28	0.027	0	Spermatocytes	AC008555.2
0	0.406163	0.548	0.291	0	Spermatocytes	WDR70
0	0.405465	0.405	0.118	0	Spermatocytes	AC007785.1
0	0.405008	0.404	0.115	0	Spermatocytes	MOV10L1
0	0.404959	0.42	0.156	0	Spermatocytes	CCDC178
0	0.40354	0.383	0.103	0	Spermatocytes	TBC1D12
0	0.403516	0.365	0.103	0	Spermatocytes	APH1B
0	0.40324	0.584	0.317	0	Spermatocytes	ANKS1B
0	0.403111	0.382	0.103	0	Spermatocytes	NIFK-AS1
0	0.402312	0.404	0.116	0	Spermatocytes	DNAAF4
0	0.40098	0.505	0.239	0	Spermatocytes	TTLL5
0	0.400749	0.355	0.082	0	Spermatocytes	XKR9
0	0.399197	0.523	0.218	0	Spermatocytes	LRRIQ1
0	0.398821	0.366	0.081	0	Spermatocytes	WDR62
0	0.396688	0.485	0.221	0	Spermatocytes	KIAA0825
0	0.396562	0.4	0.141	0	Spermatocytes	HIST1H2BA
0	0.396547	0.373	0.088	0	Spermatocytes	CCP110
0	0.39542	0.586	0.334	0	Spermatocytes	PIBF1
0	0.395237	0.401	0.119	0	Spermatocytes	GRK4
0	0.395048	0.482	0.191	0	Spermatocytes	DNAH7
0	0.394179	0.47	0.198	0	Spermatocytes	RHBDD1
0	0.393502	0.325	0.071	0	Spermatocytes	STRIP2
[truncated: 2,689 more rows]
