# Supplementary material for: SARS-CoV-2 infection reduces the number of spermatogonial stem cells and dysregulates the transcriptional landscape of the human testis
Source: Research Square preprint supplement (doi:10.21203/rs.3.rs-9371895/v1), 2026-04-21
Supplement: Supplementary file 12 [file aa153325c3251c973af70900.xlsx]

## Sheet: Hoja1
	Sample	N1	N2	RNase P
	NTC	N/A	N/A	N/A
	NEG	N/A	N/A	32.14
	POS	33.13	32.21	31.38
COVID-19	1156042D	N/A	N/A	25.85
COVID-19	B2200825	N/A	N/A	27.05
COVID-19	B2200973	N/A	N/A	28.63
COVID-19	B2200874	N/A	N/A	30.09
COVID-19	B2200260	N/A	N/A	26.29
COVID-19	B2200312	N/A	N/A	29.15
COVID-19	B2200929	N/A	N/A	27.27
Control	B2200613	N/A	N/A	24.28
Control	B2201024	N/A	N/A	27.61
Control	B2200729	N/A	N/A	23.8
Control	B2200313	N/A	N/A	26.5
Control	B2201132	N/A	N/A	28.13
Control	B2201131	N/A	N/A	28.32
Control	B2200971	N/A	N/A	27.5
Control	B2200873	N/A	N/A	25.66
Control	B2200170	N/A	N/A	25.12
