# Supplementary material for: SARS-CoV-2 infection reduces the number of spermatogonial stem cells and dysregulates the transcriptional landscape of the human testis
Source: Research Square preprint supplement (doi:10.21203/rs.3.rs-9371895/v1), 2026-04-21

a

Biological Process

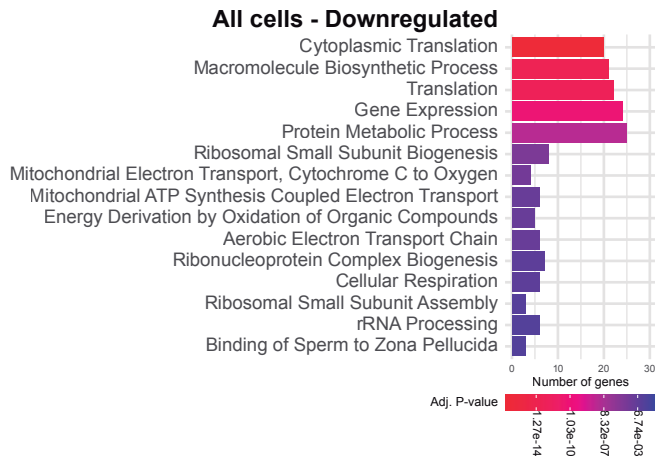

b

Biological Process

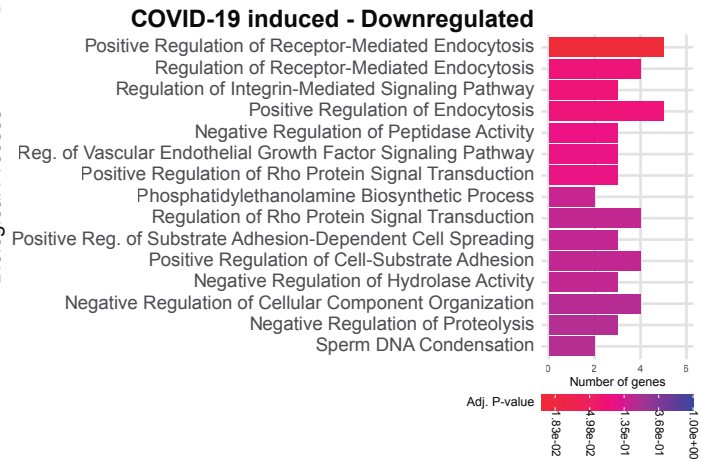

Biological Process

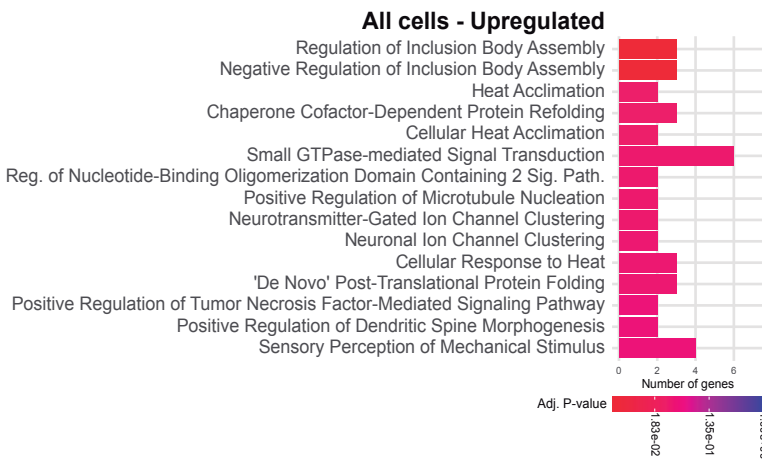

Biological Process

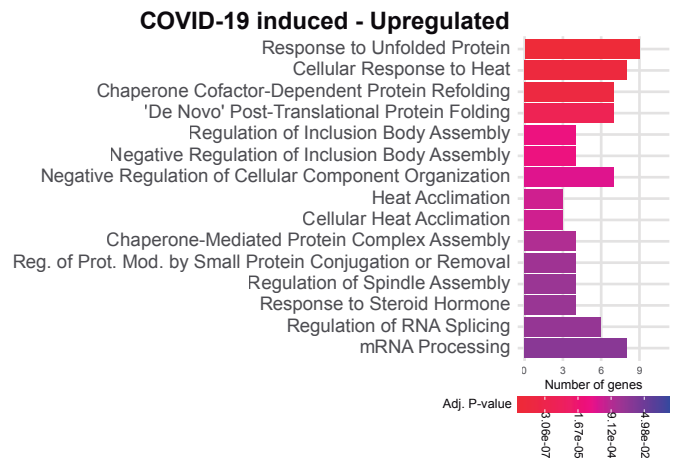

c

Biological Process

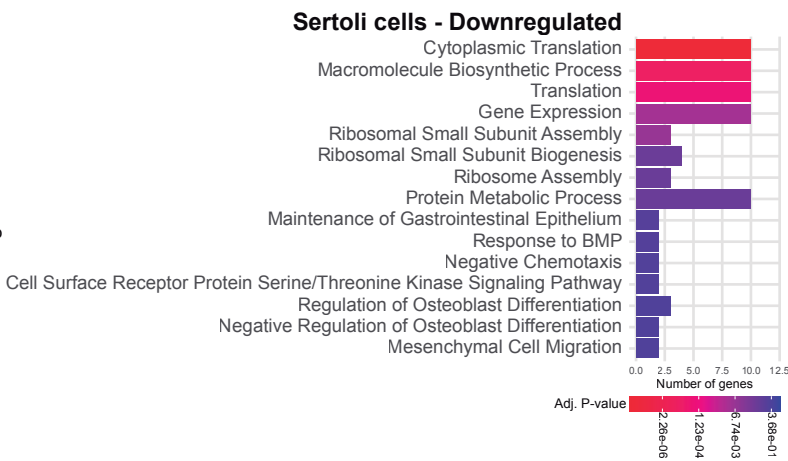

d

Biological Process

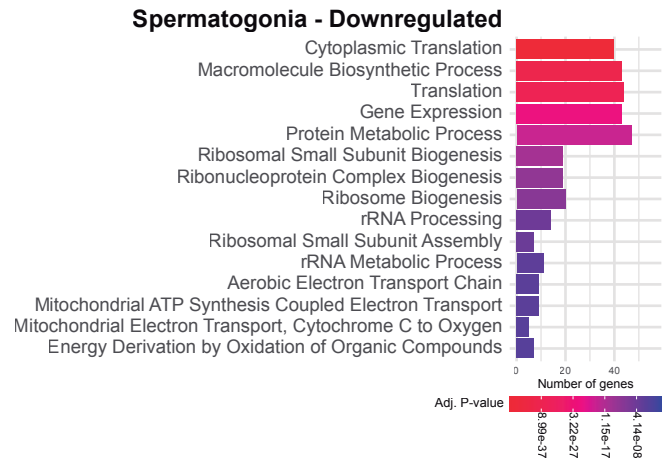

Biological Process

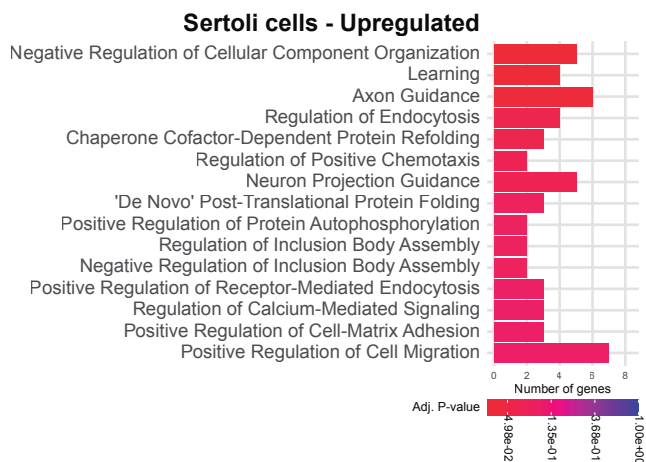

Biological Process

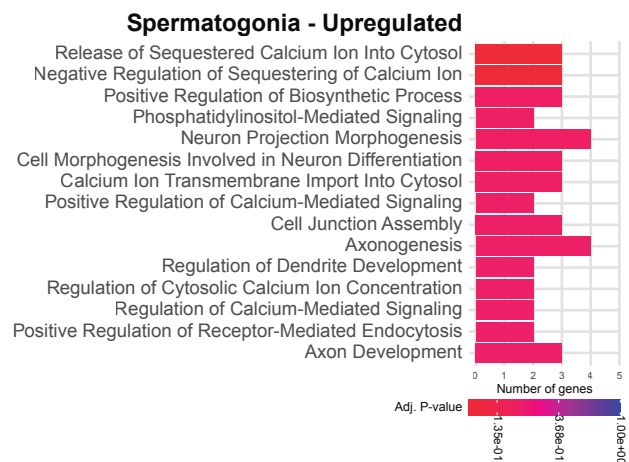

Supplement: Supplementary file 15 [file 94ff7b2247937e3d029f9147.pdf]
