# Supplementary material for: SARS-CoV-2 infection reduces the number of spermatogonial stem cells and dysregulates the transcriptional landscape of the human testis
Source: Research Square preprint supplement (doi:10.21203/rs.3.rs-9371895/v1), 2026-04-21
Supplement: Supplementary file 15 [file c545c93626b4569e5dd3d910.xlsx]

## Sheet: Control vs Covid all cells
p_val	avg_log2FC	pct.1	pct.2	p_val_adj	gene	cluster
0	4.81413	0.101	0.004	0	HDAC4-AS1	allcells
0	4.30991	0.311	0.012	0	RBAKDN	allcells
0	4.23682	0.114	0.003	0	AL161912.1	allcells
0	3.59041	0.105	0.006	0	LINC00668	allcells
0	3.58461	0.107	0.004	0	LINC02475	allcells
0	3.55319	0.256	0.021	0	SNHG27	allcells
0	3.52426	0.117	0.006	0	SPATA8	allcells
0	3.5224	0.228	0.017	0	LINC02367	allcells
0	3.51624	0.403	0.038	0	RPLP1	allcells
0	3.46421	0.174	0.011	0	FAM229A	allcells
0	3.43992	0.203	0.015	0	FAU	allcells
0	3.39144	0.128	0.011	0	ROMO1	allcells
0	3.3869	0.35	0.025	0	HIST1H2AA	allcells
0	3.36096	0.149	0.01	0	AC006019.1	allcells
0	3.29552	0.125	0.011	0	PPP1R35	allcells
0	3.2502	0.272	0.026	0	C5orf58	allcells
0	3.13469	0.157	0.012	0	FMC1	allcells
0	3.11272	0.128	0.008	0	LINC01016	allcells
0	3.1085	0.258	0.022	0	AC126323.2	allcells
0	3.04337	0.228	0.029	0	AC105402.3	allcells
0	3.01332	0.167	0.018	0	UBL5	allcells
0	3.01223	0.146	0.009	0	AL133499.1	allcells
0	3.01197	0.345	0.037	0	RPL15	allcells
0	3.00839	0.228	0.027	0	RPS21	allcells
0	2.97181	0.226	0.019	0	IZUMO4	allcells
0	2.97093	0.365	0.035	0	H2AFJ	allcells
0	2.95907	0.162	0.014	0	LRWD1	allcells
0	2.95875	0.153	0.012	0	NDUFAF3	allcells
0	2.91066	0.283	0.037	0	LINC01297	allcells
0	2.90166	0.313	0.028	0	COX7A2	allcells
0	2.89981	0.266	0.033	0	RPS28	allcells
0	2.89376	0.108	0.007	0	AC091544.2	allcells
0	2.88464	0.177	0.019	0	HINT1	allcells
0	2.87887	0.115	0.012	0	PLEKHG4	allcells
0	2.86004	0.338	0.046	0	LINC01206	allcells
0	2.85811	0.31	0.041	0	AC004936.1	allcells
0	2.8489	0.161	0.016	0	AC092666.1	allcells
0	2.83298	0.256	0.022	0	CPEB2-DT	allcells
0	2.82101	0.108	0.009	0	SLC9A3-AS1	allcells
0	2.81637	0.324	0.035	0	RNASE1	allcells
0	2.80662	0.255	0.03	0	RPS23	allcells
0	2.80587	0.392	0.066	0	MIR202HG	allcells
0	2.79403	0.246	0.032	0	RPS14	allcells
0	2.79316	0.109	0.012	0	RABAC1	allcells
0	2.7851	0.103	0.009	0	LINC00917	allcells
0	2.73949	0.124	0.014	0	LINC01001	allcells
0	2.72535	0.276	0.036	0	COX6C	allcells
0	2.69655	0.249	0.031	0	SPAG6	allcells
0	2.69014	0.16	0.017	0	SAYSD1	allcells
0	2.66917	0.123	0.012	0	POLR2I	allcells
0	2.6611	0.304	0.029	0	SPINK2	allcells
0	2.65161	0.33	0.043	0	DPY19L2	allcells
0	2.64319	0.141	0.02	0	RPL36AL	allcells
0	2.64316	0.347	0.049	0	CST3	allcells
0	2.62588	0.267	0.037	0	TMSB10	allcells
0	2.62103	0.171	0.018	0	KRBOX1	allcells
0	2.61081	0.154	0.019	0	TMEM99	allcells
0	2.60029	0.124	0.016	0	ACYP1	allcells
0	2.59949	0.247	0.023	0	ALKBH7	allcells
0	2.59167	0.121	0.016	0	MIF	allcells
0	2.57778	0.231	0.027	0	GIHCG	allcells
0	2.57759	0.123	0.012	0	C20orf144	allcells
0	2.5742	0.27	0.039	0	RPS18	allcells
0	2.56535	0.208	0.027	0	MGAT4D	allcells
0	2.55807	0.107	0.012	0	OXSM	allcells
0	2.55278	0.177	0.023	0	COX20	allcells
0	2.55091	0.185	0.018	0	TUBA3C	allcells
0	2.533	0.219	0.033	0	SRP14	allcells
0	2.51707	0.104	0.017	0	PFDN6	allcells
0	2.5043	0.108	0.018	0	AC136616.1	allcells
0	2.49707	0.132	0.016	0	PLCZ1	allcells
0	2.49566	0.143	0.021	0	AL021368.2	allcells
0	2.48919	0.112	0.017	0	GNG5	allcells
0	2.48444	0.167	0.025	0	COX4I1	allcells
0	2.483	0.156	0.013	0	LINC00395	allcells
0	2.47918	0.16	0.023	0	RPS13	allcells
0	2.47025	0.197	0.028	0	RPL29	allcells
0	2.46009	0.122	0.018	0	NDUFB4	allcells
0	2.45983	0.307	0.031	0	TSACC	allcells
0	2.44336	0.259	0.033	0	APH1B	allcells
0	2.42853	0.101	0.018	0	HLA-A	allcells
0	2.41874	0.168	0.027	0	PDCD5	allcells
0	2.40287	0.155	0.021	0	C4orf48	allcells
0	2.39397	0.138	0.012	0	AL450306.1	allcells
0	2.39175	0.155	0.014	0	BTG4	allcells
0	2.38089	0.199	0.032	0	RPL18	allcells
0	2.37811	0.161	0.018	0	ZPBP2	allcells
0	2.3735	0.106	0.008	0	AL138889.1	allcells
0	2.36911	0.134	0.024	0	CD81	allcells
0	2.35985	0.28	0.04	0	C5orf47	allcells
0	2.35858	0.137	0.02	0	SOX9	allcells
0	2.3526	0.229	0.027	0	MARCH11	allcells
0	2.3513	0.113	0.011	0	GLIPR1L1	allcells
0	2.33889	0.212	0.028	0	AURKAIP1	allcells
0	2.33454	0.165	0.028	0	RPS17	allcells
0	2.33315	0.184	0.029	0	RPLP0	allcells
0	2.33236	0.117	0.02	0	MARCKSL1	allcells
0	2.32801	0.166	0.026	0	RPL23	allcells
0	2.3226	0.242	0.036	0	OBSL1	allcells
0	2.32012	0.269	0.039	0	ADD3-AS1	allcells
0	2.31926	0.166	0.024	0	KRTCAP2	allcells
0	2.31563	0.121	0.022	0	COX17	allcells
0	2.29959	0.252	0.032	0	ATP5IF1	allcells
0	2.29918	0.334	0.056	0	RPL41	allcells
0	2.29488	0.298	0.045	0	RPL7A	allcells
0	2.29268	0.141	0.015	0	AL021396.1	allcells
0	2.29245	0.372	0.048	0	GPX4	allcells
0	2.29051	0.104	0.017	0	COL3A1	allcells
0	2.28632	0.187	0.027	0	COX7C	allcells
0	2.28432	0.179	0.031	0	RPS16	allcells
0	2.28052	0.471	0.087	0	NOVA1	allcells
0	2.27896	0.112	0.018	0	ATP5MF	allcells
0	2.27103	0.108	0.01	0	ROPN1	allcells
0	2.26591	0.158	0.018	0	MRVI1-AS1	allcells
0	2.26566	0.109	0.011	0	ANGPTL1	allcells
0	2.26547	0.14	0.016	0	ZNF574	allcells
0	2.261	0.177	0.02	0	DKKL1	allcells
0	2.26099	0.282	0.041	0	AL390860.1	allcells
0	2.2595	0.116	0.031	0	PDK4	allcells
0	2.25866	0.227	0.027	0	AL590705.1	allcells
0	2.24635	0.151	0.027	0	TUBA1B	allcells
0	2.23772	0.982	0.304	0	MT-ND3	allcells
0	2.22789	0.116	0.011	0	ITFG1-AS1	allcells
0	2.22741	0.292	0.046	0	REXO5	allcells
0	2.22528	0.136	0.016	0	SYCE3	allcells
0	2.21063	0.31	0.054	0	FANCL	allcells
0	2.20157	0.2	0.029	0	ADAM2	allcells
0	2.20072	0.154	0.023	0	ACRBP	allcells
0	2.1978	0.191	0.03	0	C18orf54	allcells
0	2.19272	0.252	0.072	0	PRPS2	allcells
0	2.18811	0.153	0.021	0	AC114956.3	allcells
0	2.18434	0.666	0.179	0	ANKRD7	allcells
0	2.18265	0.127	0.022	0	SEC61G	allcells
0	2.17884	0.25	0.037	0	ARL6IP6	allcells
0	2.17277	0.109	0.019	0	GSTA1	allcells
0	2.17078	0.112	0.019	0	DRAP1	allcells
0	2.16938	0.119	0.026	0	AC093838.1	allcells
0	2.1649	0.455	0.091	0	ETNK1	allcells
0	2.16435	0.299	0.052	0	RPLP2	allcells
0	2.16372	0.118	0.02	0	COX6A1	allcells
0	2.16119	0.162	0.024	0	AL451165.2	allcells
0	2.1535	0.198	0.033	0	NABP1	allcells
0	2.15177	0.148	0.024	0	MBD6	allcells
0	2.14664	0.294	0.05	0	SERF2	allcells
0	2.14275	0.26	0.04	0	PIWIL1	allcells
0	2.14074	0.209	0.031	0	NAA38	allcells
0	2.13874	0.22	0.035	0	PFDN5	allcells
0	2.13536	0.254	0.045	0	LPXN	allcells
0	2.13478	0.23	0.045	0	NEU3	allcells
0	2.13225	0.589	0.124	0	PTGDS	allcells
0	2.12901	0.114	0.023	0	MIR503HG	allcells
0	2.1148	0.143	0.023	0	ATP5PF	allcells
0	2.11357	0.261	0.051	0	CEPT1	allcells
0	2.11145	0.361	0.07	0	CPEB2	allcells
0	2.11131	0.125	0.021	0	ADAD2	allcells
0	2.11002	0.117	0.019	0	MMADHC	allcells
0	2.10259	0.111	0.011	0	LINC00930	allcells
0	2.09845	0.12	0.014	0	ONECUT1	allcells
0	2.09566	0.45	0.092	0	KHDRBS3	allcells
0	2.09209	0.177	0.027	0	RNF103	allcells
0	2.08918	0.149	0.024	0	MZT2B	allcells
0	2.08629	0.248	0.046	0	RPL34	allcells
0	2.08488	0.227	0.083	0	LINC02388	allcells
0	2.08101	0.458	0.101	0	SS18	allcells
0	2.07671	0.267	0.045	0	RPS27A	allcells
0	2.07407	0.111	0.011	0	OPN5	allcells
0	2.06865	0.165	0.019	0	CETN1	allcells
0	2.06477	0.163	0.021	0	BOLL	allcells
0	2.05908	0.32	0.074	0	SCML1	allcells
0	2.05739	0.103	0.013	0	CAPZA3	allcells
0	2.05472	0.154	0.022	0	ANAPC11	allcells
0	2.05314	0.157	0.025	0	TOMM7	allcells
0	2.0496	0.33	0.054	0	TUBB4B	allcells
0	2.04687	0.992	0.432	0	MT-CO3	allcells
0	2.04667	0.123	0.02	0	TAF9	allcells
0	2.0459	0.105	0.013	0	PENK	allcells
0	2.04154	0.22	0.029	0	AL137856.1	allcells
0	2.04043	0.969	0.314	0	MT-ATP6	allcells
0	2.03976	0.134	0.017	0	COX6B2	allcells
0	2.03544	0.543	0.115	0	EEF1A1	allcells
0	2.02756	0.177	0.028	0	PRND	allcells
0	2.02566	0.121	0.026	0	LY6K	allcells
0	2.02485	0.119	0.017	0	C11orf71	allcells
0	2.02126	0.102	0.02	0	TOMM5	allcells
0	2.02068	0.123	0.025	0	ENY2	allcells
0	2.01856	0.115	0.016	0	CTSV	allcells
0	2.01646	0.126	0.019	0	FHL5	allcells
0	2.01033	0.281	0.046	0	HORMAD2	allcells
0	2.00721	0.5	0.136	0	STRBP	allcells
0	2.00459	0.103	0.019	0	RNASEK	allcells
0	-2.00594	0.093	0.139	0	RELN	allcells
0	-2.01801	0.078	0.124	0	ARHGAP15	allcells
0	-2.01877	0.098	0.123	0	TMEM192	allcells
0	-2.02154	0.154	0.213	0	ERC2	allcells
0	-2.02438	0.211	0.31	0	CACNA1A	allcells
0	-2.03137	0.067	0.106	0	LINC00877	allcells
0	-2.03417	0.102	0.156	0	ABR	allcells
0	-2.04649	0.087	0.144	0	AC120193.1	allcells
0	-2.06277	0.067	0.112	0	LINC00862	allcells
0	-2.06911	0.113	0.191	0	CCDC26	allcells
0	-2.07919	0.09	0.13	0	AC068587.4	allcells
0	-2.08156	0.095	0.15	0	LHFPL3	allcells
0	-2.08289	0.081	0.116	0	PXDNL	allcells
0	-2.08504	0.073	0.108	0	AC112206.2	allcells
0	-2.08758	0.061	0.102	0	LINC01435	allcells
0	-2.12082	0.1	0.14	0	ESRRG	allcells
0	-2.13467	0.085	0.125	0	DEC1	allcells
0	-2.13846	0.083	0.135	0	RASGEF1B	allcells
0	-2.14599	0.086	0.136	0	DENND2A	allcells
0	-2.1473	0.115	0.167	0	KSR2	allcells
0	-2.15346	0.086	0.138	0	TACC2	allcells
0	-2.15922	0.075	0.127	0	KCNQ5	allcells
0	-2.16039	0.076	0.115	0	TMPRSS9	allcells
0	-2.16734	0.074	0.124	0	SORCS2	allcells
0	-2.16787	0.088	0.143	0	SPTBN4	allcells
0	-2.17323	0.137	0.212	0	AL138720.1	allcells
0	-2.18816	0.071	0.116	0	SLC4A4	allcells
0	-2.20079	0.087	0.146	0	UNC5D	allcells
0	-2.20371	0.102	0.157	0	TTF2	allcells
0	-2.20458	0.099	0.159	0	MIR3681HG	allcells
0	-2.2105	0.072	0.112	0	AC099489.1	allcells
0	-2.21476	0.06	0.108	0	HSPA1A	allcells
0	-2.22361	0.101	0.143	0	RYR1	allcells
0	-2.23263	0.101	0.171	0	THSD7B	allcells
0	-2.24077	0.068	0.105	0	CELSR1	allcells
0	-2.24141	0.068	0.106	0	WWC1	allcells
0	-2.24783	0.064	0.125	0	GPM6A	allcells
0	-2.27429	0.053	0.101	0	SATB1-AS1	allcells
0	-2.28038	0.106	0.167	0	NTM	allcells
0	-2.28201	0.083	0.15	0	DGKB	allcells
0	-2.29363	0.056	0.121	0	AC096570.1	allcells
0	-2.29465	0.059	0.113	0	LINC01470	allcells
0	-2.31242	0.106	0.175	0	SHANK2	allcells
0	-2.31657	0.071	0.104	0	ARSG	allcells
0	-2.33888	0.057	0.106	0	CLMP	allcells
0	-2.34431	0.069	0.135	0	LUZP2	allcells
0	-2.35184	0.077	0.117	0	SLC35F2	allcells
0	-2.37418	0.11	0.212	0	TMEM132D	allcells
0	-2.38221	0.089	0.179	0	LINC01505	allcells
0	-2.38675	0.076	0.136	0	PIEZO2	allcells
0	-2.41295	0.376	0.538	0	LINC00486	allcells
0	-2.41837	0.07	0.113	0	ERV3-1	allcells
0	-2.43359	0.086	0.158	0	PALM2-AKAP2	allcells
0	-2.48235	0.109	0.183	0	RAP1GAP2	allcells
0	-2.50556	0.27	0.427	0	MTRNR2L12	allcells
0	-2.52842	0.057	0.126	0	SHISA9	allcells
0	-2.53118	0.234	0.448	0	CNTNAP2	allcells
0	-2.53913	0.126	0.268	0	CDH13	allcells
0	-2.53949	0.064	0.137	0	AL136456.1	allcells
0	-2.54	0.063	0.14	0	CREB5	allcells
0	-2.58076	0.053	0.128	0	HSPA1B	allcells
0	-2.60081	0.059	0.138	0	AL157944.1	allcells
0	-2.61061	0.102	0.213	0	OPCML	allcells
0	-2.61255	0.142	0.273	0	CMYA5	allcells
0	-2.61278	0.06	0.131	0	LINC02006	allcells
0	-2.63938	0.116	0.253	0	CNTN5	allcells
0	-2.67936	0.282	0.559	0	RBFOX1	allcells
0	-2.68601	0.139	0.343	0	LRP1B	allcells
0	-2.72255	0.055	0.119	0	RBFOX3	allcells
0	-2.74086	0.082	0.195	0	AGBL1	allcells
0	-2.7475	0.055	0.133	0	COL26A1	allcells
0	-2.75126	0.053	0.137	0	LRRTM4	allcells
0	-2.75985	0.074	0.16	0	AL592429.2	allcells
0	-2.76547	0.058	0.129	0	AC016766.1	allcells
0	-2.77254	0.053	0.101	0	EDARADD	allcells
0	-2.77454	0.064	0.148	0	EGLN3	allcells
0	-2.79177	0.093	0.153	0	AC245060.5	allcells
0	-2.79651	0.041	0.104	0	CPA6	allcells
0	-2.79932	0.068	0.158	0	SPRY4-AS1	allcells
0	-2.80488	0.121	0.195	0	DNAJB1	allcells
0	-2.818	0.069	0.152	0	CUX2	allcells
0	-2.82895	0.04	0.105	0	OBI1-AS1	allcells
0	-2.83224	0.051	0.138	0	PLA2G4C	allcells
0	-2.86511	0.117	0.28	0	FRMD4A	allcells
0	-2.86623	0.067	0.164	0	CLIP2	allcells
0	-2.8732	0.047	0.12	0	UNC13C	allcells
0	-2.92711	0.049	0.122	0	GSG1L	allcells
0	-2.94497	0.043	0.111	0	C8orf34	allcells
0	-2.97043	0.037	0.102	0	LINC02694	allcells
0	-2.99053	0.067	0.169	0	AC092100.1	allcells
0	-3.00493	0.056	0.149	0	LINC00276	allcells
0	-3.00965	0.096	0.254	0	LRRC4C	allcells
0	-3.09184	0.041	0.118	0	U91319.1	allcells
0	-3.14468	0.036	0.105	0	MYH14	allcells
0	-3.40088	0.039	0.133	0	NOS1	allcells
0	-3.54717	0.029	0.136	0	LUCAT1	allcells
0	-3.68399	0.152	0.413	0	PLCG2	allcells
0	-3.70119	0.03	0.125	0	AL591506.1	allcells
0	-3.78877	0.043	0.186	0	CNTNAP5	allcells
0	-4.54871	0.059	0.35	0	AL627171.2	allcells
