# Supplementary material for: SARS-CoV-2 infection reduces the number of spermatogonial stem cells and dysregulates the transcriptional landscape of the human testis
Source: Research Square preprint supplement (doi:10.21203/rs.3.rs-9371895/v1), 2026-04-21
Supplement: Supplementary file 16 [file a647b5fc1d321c58c67d5414.docx]

**Supplementary Table 17. qRT-PCR protocol**

| **Cycling step** | **Temperature (ºC)** | **Time** | **Number of cycles** |
| --- | --- | --- | --- |
| Reverse transcription | 50 | 10 min | 1 |
| Enzyme activation | 95 | 10 min | 1 |
| Denaturation | 95 | 10 s | 45 |
| Primer annealing and extension | 60 | 30 s |
| Go to step 3 and repeat 44 times |  |  |  |
