# Supplementary material for: SARS-CoV-2 infection reduces the number of spermatogonial stem cells and dysregulates the transcriptional landscape of the human testis
Source: Research Square preprint supplement (doi:10.21203/rs.3.rs-9371895/v1), 2026-04-21
Supplement: Supplementary file 17 [file afbb15c6a9f9b309891ef6e4.docx]

**Supplementary Table 12. Summary of reproductive data**

|  | Control | COVID-19 | p-value (Fisher’s Exact Test) |
| --- | --- | --- | --- |
| Presence of testicular sperm | 7/10 (70%) | 5/7 (71.4%) | 1 |
| Couples treated | 4 | 5 | N/A |
| Fertilization rate (D3 embryos) | 31/54 (57.4%) | 20/56 (35.7%) | 0.03495 |
| D3 embryo quality | A = 3 (9.7%)  B = 8 (25.8%)  C = 13 (41.9%)  D = 7 (22.6%) | A = 5 (25%)  B = 3 (15%)  C = 11 (55%)  D = 1 (5%) | A = 0.237  B = 0.493  C = 0.402  D = 0.127 |
| Implantation rate (number of implanted embryos related to the total number of transferred embryos) | 2/5 (40%) | 6/11 (54%) | 1 |
| Pregnancy rate per transference | 2/5 (40%) | 6/9 (66.7%) (number differs from implantation rate since 2 transferences were done transferring 2 embryos each time) | 0.5804 |
| Live birth rate per clinical pregnancy | 2/2 (100%) | 4/6 (66.6%) | 1 |
