# Supplementary material for: SARS-CoV-2 infection reduces the number of spermatogonial stem cells and dysregulates the transcriptional landscape of the human testis
Source: Research Square preprint supplement (doi:10.21203/rs.3.rs-9371895/v1), 2026-04-21
Supplement: Supplementary file 19 [file c488458a1e3cd3d6d67a38c5.docx]

**Supplementary table 9. Reproductive information of TESE samples**

| **Sample** | **Type** | **TESE retrieval date (dd/mm/aaaa)** | **TESE retrieval** | **ICSI (date, dd/mm/aaaa))** | **Centre of ICSI** | **Fertilization rate** | **Day 3 quality** | **Number of transferred embryos** | **Implantation** | **Pregnancy** | **Birth** | **Comments** |
| --- | --- | --- | --- | --- | --- | --- | --- | --- | --- | --- | --- | --- |
| B2200729 | CONTROL | 08/04/2022 | Negative | No | N/A | N/A | N/A | N/A | N/A | N/A | N/A | Woman is not on waitlist, not interested in donor artificial insemination |
| B2201132 | CONTROL | 03/06/2022 | Positive | Yes (04/10/2022, 25/01/2023) | Fundació Puigvert (Spain) | 5/6 (83%) | B: 1  C: 2  D: 2 | 1 FsET | 0 | No | N/A | 1st ICSI (04/10/2022): 3 M2 🡪 3 fertilized 2PN 🡪 1 FsET (D5). No pregnancy, no freezing |
| 2nd ICSI (25/01/2023): 3 M2 🡪 2 fertilized 2PN 🡪 non-evolving; no transfer |
| B2201131 | CONTROL | 03/06/2022 | Positive | No | N/A | N/A | N/A | N/A | N/A | N/A | N/A | Does not have partner, TESE samples in custody |
| B2200873 | CONTROL | 29/04/2022 | Positive | Yes (30/03/2023, 17/10/2023, 02/02/2024) | Fundació Puigvert (Spain) | 19/29 (65%) | A: 2  B: 4  C: 8  D: 5 | 1 FzET  1 FzET+PGT | 0 | No | N/A | PGT-SR due to Robertsonian translocation in patient. |
| 1st ICSI (30/03/2023): 10 M2 🡪 6 fertilized 2PN (4 PGT, 1 eupoid) 🡪 1 FzET 🡪 no pregnancy |
| 2nd ICSI (17/10/2023): 5 M2 🡪 5 fertilized 2PN (2 PGT, 1 euploid) |
| 3rd ICSI (02/02/2024): 14 M2 🡪 8 fertilized 2PN (6 PGT, 5 euploids) |
| 1 FzET+PGT in April 2024 🡪 no pregnancy |
| 6 euploid embryos in custody. 4 TESE doses in custody |
| B2200613 | CONTROL | 25/03/2022 | Positive | Yes (10/07/2023) | Fundació Puigvert (Spain) | 5/15 (33%) | A: 1  B: 2  C: 2 | 1 FzET | 1 | Yes | Yes (08/11/2024) | PGT-M + A |
| ICSI: 15 M2  5 fertilized 2PN (5PGT, 1 euploid)  FrET of euploid embryo  pregnancy and birth (08/11/2024) |
| No frozen embryos in custody; 3 TESE doses in custody |
| B2200170 | CONTROL | 28/01/2022 | Positive | No | N/A | N/A | N/A | N/A | N/A | N/A | N/A | No sample transfer, not on IVF waiting list |
| B2200213 | CONTROL | 04/02/2022 | Negative | No | N/A | N/A | N/A | N/A | N/A | N/A | N/A | No TRA, no information about partner |
| B2200313 | CONTROL | 18/02/2022 | Positive | No | N/A | N/A | N/A | N/A | N/A | N/A | N/A | No ICSI, no transfer of samples, partner is not on IVF waiting list |
| B2200971 | CONTROL | 13/05/2022 | Positive | Yes (30/05/2022 | Fundació Puigvert (Spain) | 2/4 (50%) | B: 1  C: 1 | 1 FsET | 1 | Yes | Yes (15/02/2023) | ICSI: 4 M2  2 fertilized 2PN  1 FsET  pregnancy and birth (15/02/2023) |
| No freezing of embryos. 11 TESE doses in custody |
| B2201024 | CONTROL | 20/05/2022 | Negative | No | N/A | N/A | N/A | N/A | N/A | N/A | N/A | Couple chose to do artificial insemination with donor semen. |
| ICSI: 8 M2  6 fertilized 2PN  freezing of 5 embryos (D5-D6)  1 FzET  clinical pregnancy (10/04/2024) |
| B2200929 | COVID-19 | 06/05/2022 | Positive | Yes (01/12/2022, 12/10/2023) | Hospital Clínic (Spain) | 4/13 (30%) | A: 1  B: 1  C: 1  D: 1 | 2 FzET  2 FzET  1 FzET | 2 | Yes (3rd ICSI, private clinic) | Yes (03/02/2025) | 1st ICSI (01/12/2022): 4 M2 🡪 2 fertilized 2PN 🡪 FzET 🡪 both embryos implanted but there was a biochemical abortion  2nd ICSI (12/10/2023): 9 M2 🡪 2 fertilized 2PN 🡪 FzET 🡪 no pregnancy  3rd ICSI in private clinic 🡪 embryo transfer (D5) on 13/05/2024 and birth on 03/02/2025 |
| B2200973 | COVID-19 | 15/05/2022 | Negative | No | N/A | N/A | N/A | N/A | N/A | N/A | N/A | Not interested in donor artificial insemination |
| B2200260 | COVID-19 | 11/02/2022 | Positive | Yes (13/10/2022) | Fundació Puigvert (Spain) | 1/13 (7.7%) | A: 1 | 1 FzET | 0 | No | N/A | ICSI: 13 M2  1 fertilized 2PN  FzET (blastocyst)  no pregnancy |
| 4 vials of sperm left, no plans for new ICSI now |
| B2200312 | COVID-19 | 18/02/2022 | Positive | Yes (31/01/2023, 10/05/2023) | Fundació Puigvert (Spain) | 10/16 (75%) | A: 3  C: 7 | 1 FsET  1 FsET | 1 | Yes | Yes (January 2024) | 1st ICSI (31/01/2023): 4 M2  2 fertilized 2PN  1 FsET (D3)  no pregnancy |
| 2nd ICSI (10/05/2023): 12 M2  8 fertilized 2PN  1 FsET (D5)  pregnancy and birth (January 2024), 4 frozen embryos (D5-D6) **in custody** |
| 4 frozen embryos (D5-D6) in custody |
| 1156042 | COVID-19 | 06/05/2022 | Positive | Yes (29/01/2024) | Fundació Puigvert (Spain) | 3/5 (60%) | B: 1  C: 2 | 1 FzET | 2 | Yes | Yes (04/08/2025) | ICSI (29/01/2024): 3 frozen blastocysts (D5) 🡪 FzET (10/04/2024) 🡪 pregnancy and first trimester abortion |
| 1 FzET | 1 FzET (december 2024) 🡪 pregnancy and birth (04/08/2025) |
| 1 blastocyst in custody |
| B2200874 | COVID-19 | 29/04/2022 | Negative | No | N/A | N/A | N/A | N/A | N/A | N/A | N/A | Partner in waiting list since 2021, probably abandoned reproductive project |
| B2200825 | COVID-19 | 25/04/2022 | Positive | Yes (16/01/2023) | Fundació Puigvert (Spain) | 2/9 (22%) | B: 1  C: 1 | 1 FsET | 1 | Yes | Yes (11/10/2023) | ICSI: 9 M2  2 fertilized 2PN  1 FsET (D3)  pregnancy and birth (11/10/2025) |
| No embryos in custody |

FsET: Fresh embryo transfer; FzET: Frozen embryo transfer; FzET+PGT: euploid frozen embryo transfer
