# Supplementary material for: SARS-CoV-2 infection reduces the number of spermatogonial stem cells and dysregulates the transcriptional landscape of the human testis
Source: Research Square preprint supplement (doi:10.21203/rs.3.rs-9371895/v1), 2026-04-21
Supplement: Supplementary file 20 [file d1db228be953733acd0fc28d.docx]

**Supplementary Table 8. Summary of TESE samples**

| **Sample** | **Type** | **Age** | **COVID-19 symptoms** | **Days from disease to biopsy** | **Sample** | **Sperm recovered from sample** | **Sperm concentration in TESE extraction** | **Pathological analysis** | **Comorbidities** | **First vaccine** | **Second vaccine** | **Booster vaccine** |
| --- | --- | --- | --- | --- | --- | --- | --- | --- | --- | --- | --- | --- |
| B2200729 | Control | 43 | N/A | N/A | Left and right testicle | No | RT: 0 LT: 0 | RT: 50% hyalinosis, 50% complete block in primary spermatocytes LT: 60% hyalinosis, 40% complete block in gonia | Untreated cryptorchidism | 18/6/21 | 12/7/21 | 19/1/22 |
| B2201132 | Control | 38 | N/A | N/A | Left and right testicle | Yes | RT: 0.44 LT: 0.07 | RT: 40% hyalinosis + 60% hypospermatogenesis LT: hyalinosis + SCO | Left varicocele | 15/7/21 | 12/8/21 | No |
| B2201131 | Control | 25 | N/A | N/A | Left and right testicle | Yes | RT: 0.22 LT: 0.008 | RT, LT: incomplete block in gonia | Idiopathic hypogonadotropic hypogonadism under treatment with gonadotropins | 4/3/21 | 25/3/21 | No |
| B2200873 | Control | 44 | N/A | N/A | Left and right testicle | Yes | RT: 0.05 LT: 0.020 | RT, LT: incomplete block in primary spermatocytes | Type II diabetes, reciprocal translocation [46, XY,t(4;15)(q12;p11)] | No | No | No |
| B2200613 | Control | 46 | N/A | N/A | Left and right testicle | Yes | RT: 0.04 LT: 0.300 | RT: normal spermatogenesis  LT: mixed atrophy (normal + hypospermatogenesis) | Autosomal dominant polycystic kidney disease, possible obstruction of genital tract | 20/4/21 | 18/5/21 | 30/11/22 |
| B2200170 | Control | 38 | N/A | N/A | Left and right testicle | Yes | RT: 0.3 LT: 0.06 | RT, LT: normal spermatogenesis | Left varicocele (surgery in 2019) | 12/3/21 | 4/6/21 | 22/3/22 |
| B2200213 | Control | 44 | N/A | N/A | Left and right testicle | No | RT: 0 LT: 0 | RT, LT: 100% SCO | Bilateral cryptorchidism, bilateral orchidopexy at 9 years old | 16/6/21 | 7/7/21 | 3/5/22 |
| B2200313 | Control | 32 | N/A | N/A | Left and right testicle | Yes | RT: 0.130 LT: 0.120 | RT, LT: symmetrical hypospermatogenesis | No andrological background | 1/7/21 | 29/7/21 | 21/1/22 |
| B2200971 | Control | 42 | N/A | N/A | Left and right testicle | Yes | RT: 0.210 LT: 0.90 | RT, LT: hypospermatogenesis, more marked in LT | Sexual dysfunction, anejaculation, antidepressant medication | 1/7/21 | 22/7/21 | 3/2/22 |
| B2201024 | Control | 39 | N/A | N/A | Left and right testicle | No | RT: 0 LT: 0 | RT: 50% tubular sclerosis, 50 SCO LT: 30% hyalinosis, 70% hypospermatogenesis | Sub fertile father, cryptorchidism treated with hormones | 28/6/21 | 19/7/21 | 23/1/22 |
| B2200929 | COVID-19 | 35 | Bilateral pneumonia with hospitalization | 311 | Right testicle | Yes | RT: 0.440 | RT: 25% sclerosis, 75% normal spermatogenesis, artifacts | Bruton agammaglobulinemia, left orchiectomy, right orchitis | 14/1/21 | 9/2/21 | 21/12/21 |
| B2200973 | COVID-19 | 36 | Bronchitis with purulent sputum | 117 | Left and right testicle | No | RT: 0 LT: 0 | RT, LT: 100% tubular sclerohyalinosis | Hypogonadism, possible sarcoidosis, morbid obesity | 22/6/21 | 13/7/21 | No |
| B2200260 | COVID-19 | 44 | Low fever | 33 | Left and right testicle | Yes | RT: 0.023 LT: 0.001 | RT: 30% sclerosis, 70% hypospermatogenesis  LT: 100% SCO | Type II diabetes, HBsAg positive, bilateral varicocele | 26/8/21 | 16/9/21 | No |
| B2200312 | COVID-19 | 49 | Mild symptoms | 52 | Left and right testicle | Yes | RT: 0.140 LT: 0.180 | RT: 80% SCO, 20% normal spermatogenesis  LT: 10% SCO, 90% normal spermatogenesis | Crypto-necrozoopermia | 9/3/21 | 16/6/21 | No |
| 1156042 | COVID-19 | 43 | 5-day fever | 123 | Right testicle | Yes | RT: 0.420 | No histology, TESE suggests normal spermatogenesis | Type I diabetes, retrograde ejaculation, erectile dysfunction, obesity | 3/8/21 | No | No |
| B2200874 | COVID-19 | 33 | Anosmia | 117 | Left and right testicle | No | RT: 0 LT: 0 | RT, LT: 60% SCO, 40% hypospermatogenesis + blockage in gonia | Left varicocele grade 2 | 2/7/21 | 3/8/21 | 10/1/23 |
| B2200825 | COVID-19 | 34 | Moderate symptoms with hospitalization for colon cancer interference | 19 | Right testicle | Yes | RT: 0.670 | RT: artifacts, preserved spermatogenesis (sample fixed in formalin by mistake) | Advanced colon cancer, peritoneal carcinomatosis, anejaculation | 17/7/21 | 27/8/21 | No |
| TESE-1 | COVID-19 | 52 | Mild symptoms | 70 | ? | Yes | ? | ? | Urine infection 3 months before extraction, treated with ciprofloxacin for 14 days | - | - | - |

RT: Right testicle; LT: Left testicle; SCO: Sertoli Cell Only syndrome
