# Supplementary material for: SARS-CoV-2 infection reduces the number of spermatogonial stem cells and dysregulates the transcriptional landscape of the human testis
Source: Research Square preprint supplement (doi:10.21203/rs.3.rs-9371895/v1), 2026-04-21
Supplement: Supplementary file 22 [file f1da634f75f491a79c321a1d.docx]

**Supplementary Table 14. Primary antibodies**

| **Antibody** | **Host** | **Concentration** | **Reference** |
| --- | --- | --- | --- |
| CD3 | Mouse | 1:100 | Proteintech (60181-1-Ig) |
| CD68 | Rabbit | 1:100 | Proteintech (28058-1-AP) |
| Rabbit | 1:100 | Proteintech (25747-1-AP) |
| PARP1 | Rabbit | 1:100 | Abcam (ab32064) |
| SOX9 | Rabbit | 1:100 | Millipore Sigma (AB5535) |
| UTF1 | Rabbit | 1:100 | Millipore Sigma (AB3383-I) |
| Mouse | 1:100 | Millipore Sigma (MAB4337) |
| γH2AX | Mouse | 1:100 | Abcam (ab26350) |
| Rabbit | 1:100 | Millipore Sigma (ZRB05636) |
| YWHAB | Rabbit | 1:100 | Proteintech (10936-1-AP) |
| ARSG | Rabbit | 1:100 | Proteintech (12328-1-AP) |
| ST6GAL1 | Rabbit | 1:100 | Proteintech (14355-1-AP) |
| AIDA | Rabbit | 1:100 | Proteintech (23724-1-AP) |
| DNAJB1 | Rabbit | 1:100 | Proteintech (13174-1-AP) |
| UBE2E3 | Rabbit | 1:100 | Proteintech (15488-1-AP) |
| ERBB4 | Rabbit | 1:100 | Proteintech (19943-1-AP) |
| BRD2 | Rabbit | 1:100 | Proteintech (22236-1-AP) |
| A2BP1 | Rabbit | 1:100 | Proteintech (22647-1-AP) |
| GRP78 | Mouse | 1:100 | Proteintech (66574-1-AP) |
| STIP1 | Rabbit | 1:100 | Proteintech (15218-1-AP) |
| PLCG2 | Mouse | 1:100 | Proteintech (67011-1-AP) |
| MYO5C | Rabbit | 1:100 | ThermoFisher (PA565120) |
| LRP1B | Rabbit | 1:100 | ThermoFisher (PA564396) |
| C2orf88 | Rabbit | 1:100 | ThermoFisher (PA562004) |
| RBAK | Mouse | 1:100 | ThermoFisher (PA567159) |
| HSP70 (HSPA1B) | Rabbit | 1:100 | ThermoFisher (PA528369) |
