# Supplementary figures and images for: SARS-CoV-2 infection reduces the number of spermatogonial stem cells and dysregulates the transcriptional landscape of the human testis
Source: Research Square preprint supplement (doi:10.21203/rs.3.rs-9371895/v1), 2026-04-21

**a**

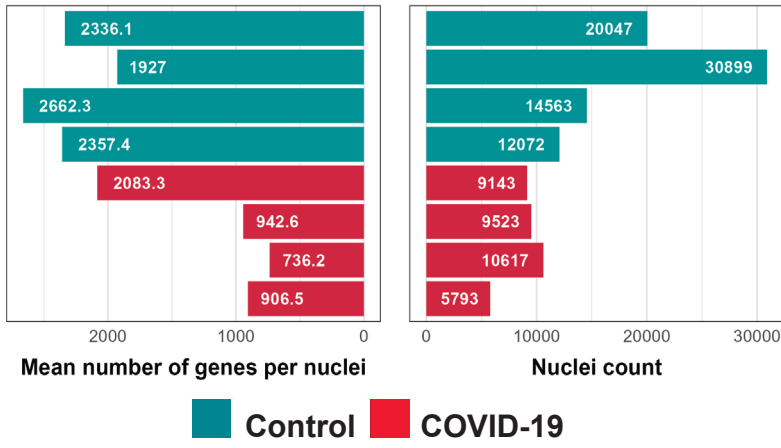

**b**

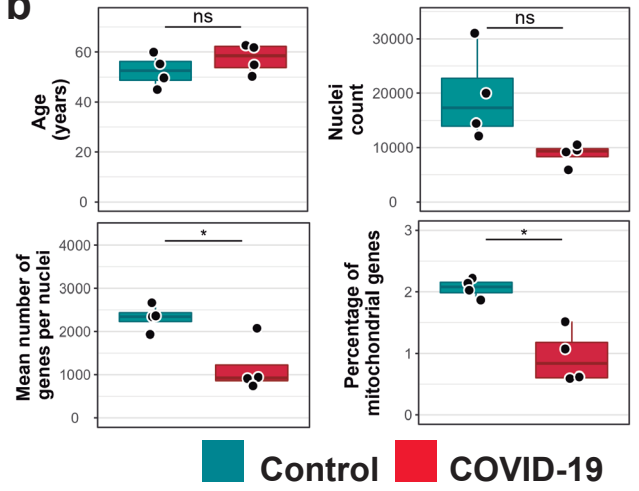

**c**

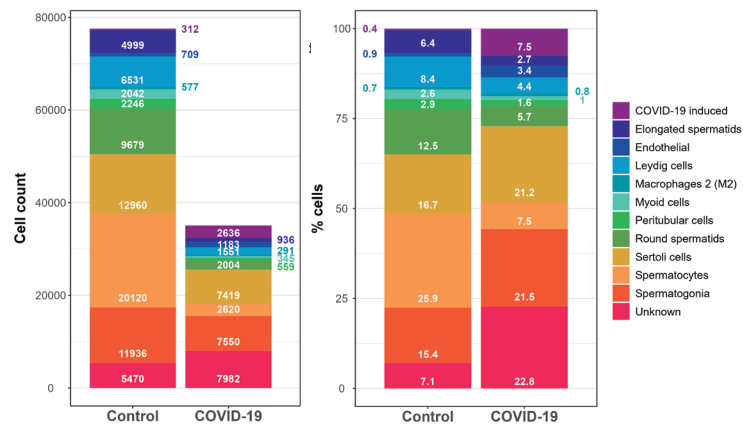

**d**

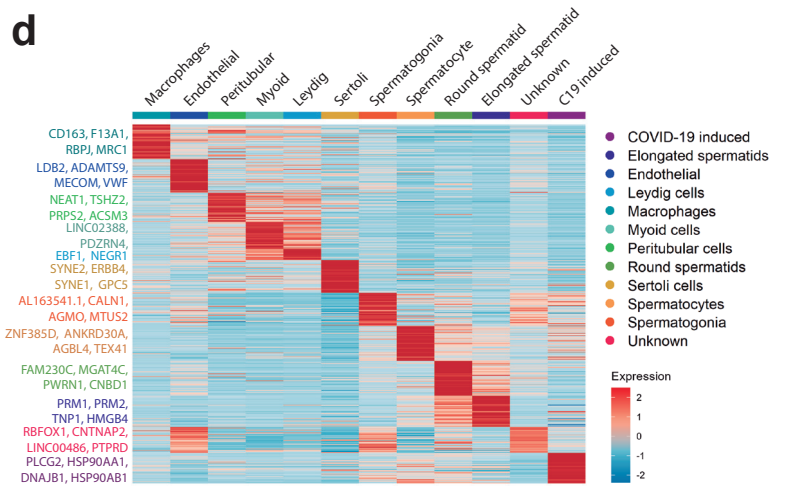

**e**

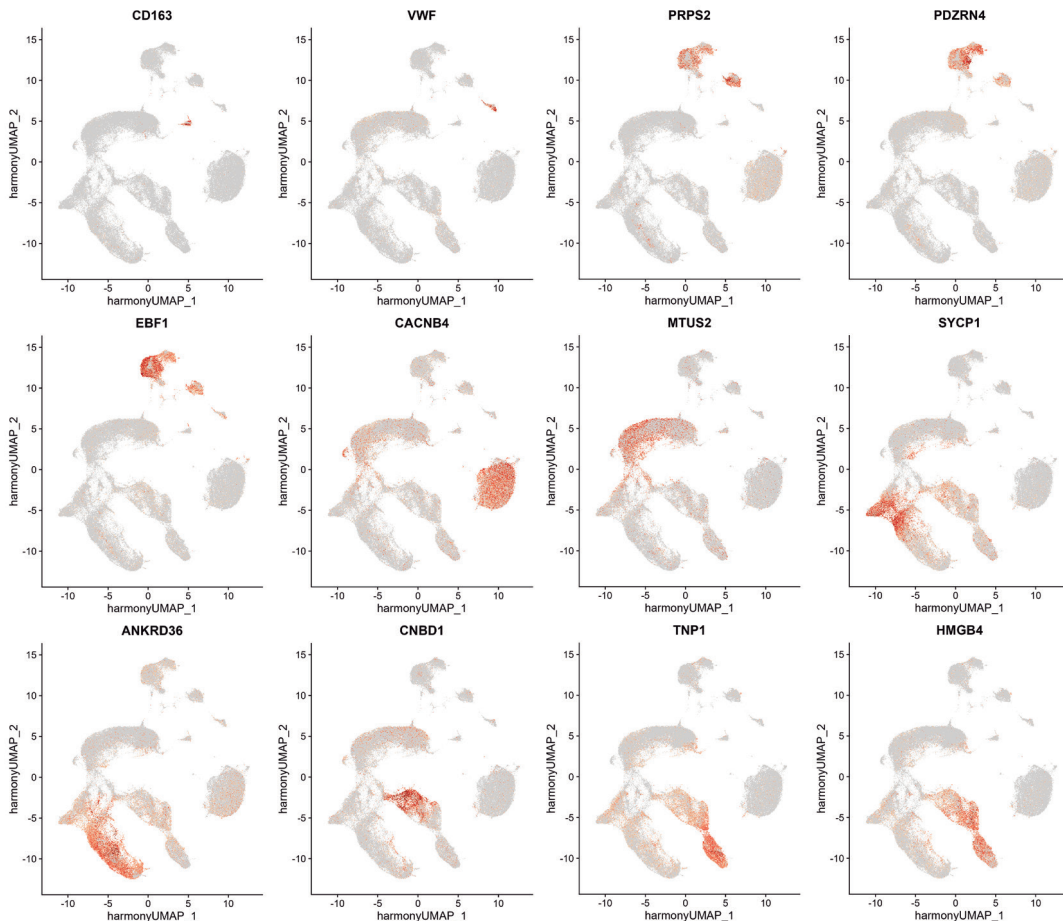

Supplement: Supplementary file 4 [file 4a21cf8ec7dec2e95a00ad9f.pdf]

a

**COVID-19 Testis & COVID-19 Brain (Parenchyma)**

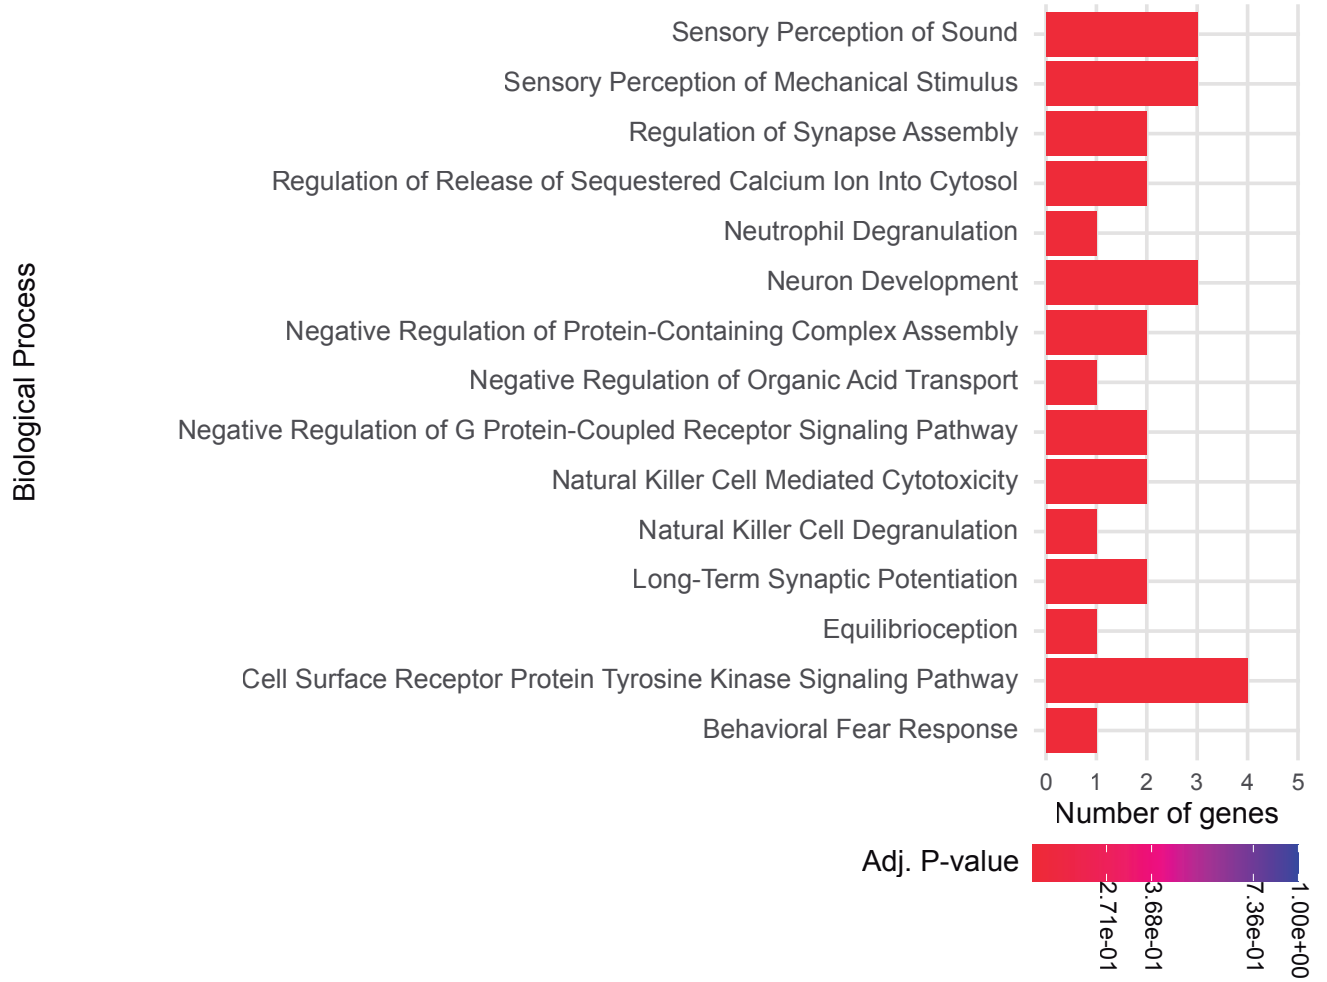

b

**COVID-19 Testis & COVID-19 Brain (Choroid plexus)**

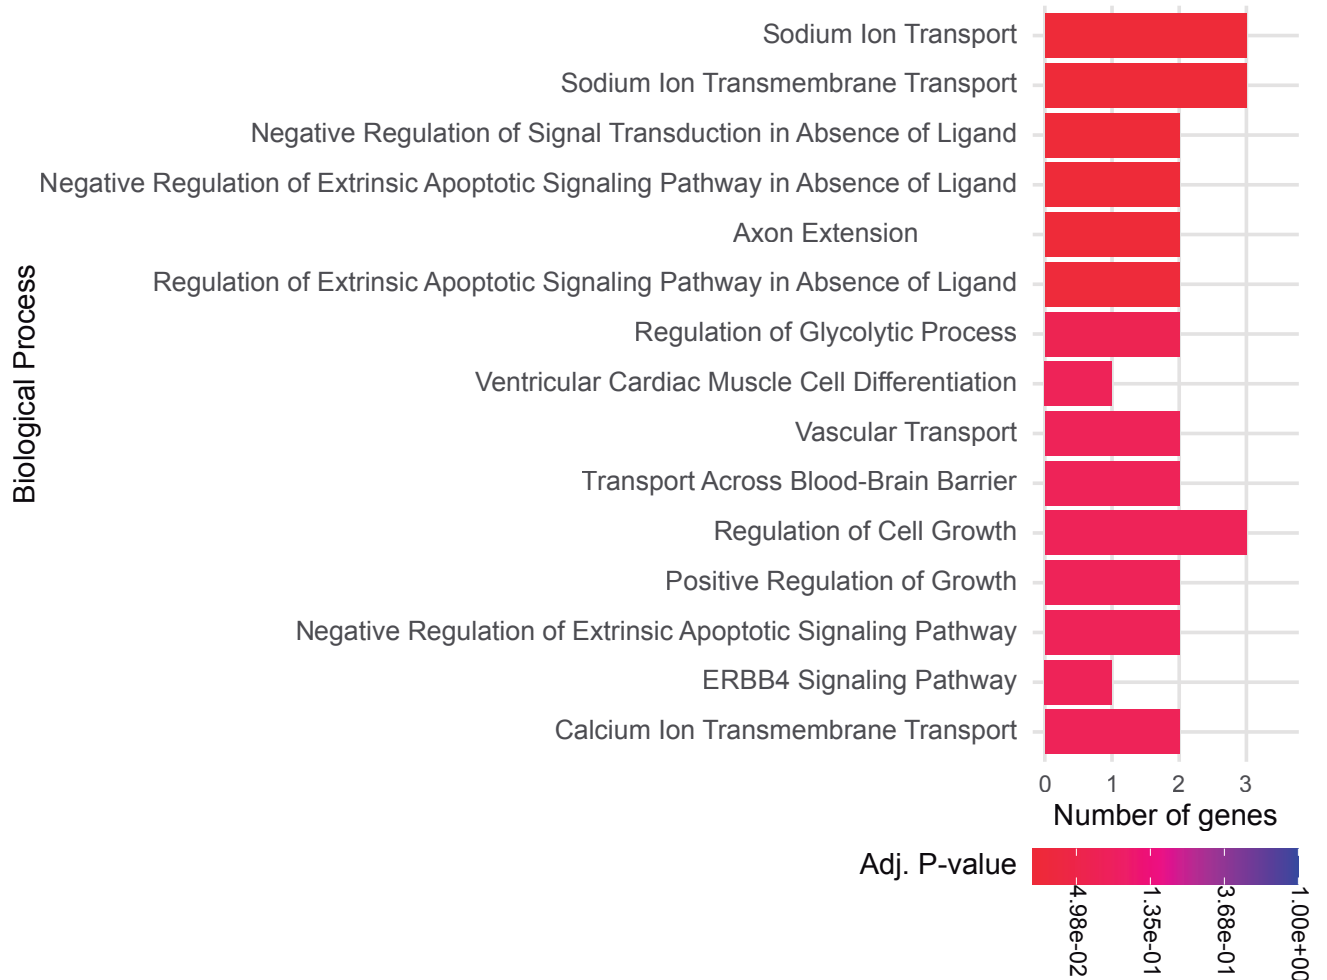

Supplement: Supplementary file 9 [file 74fcccf3e36fa29c03c79a82.pdf]

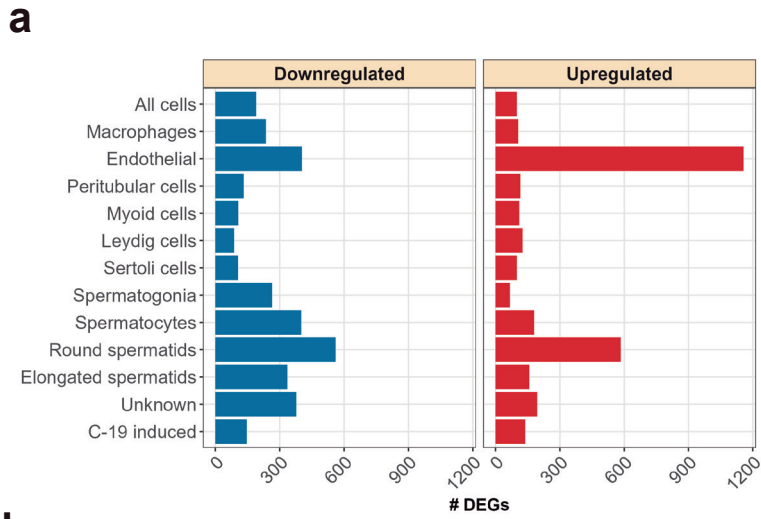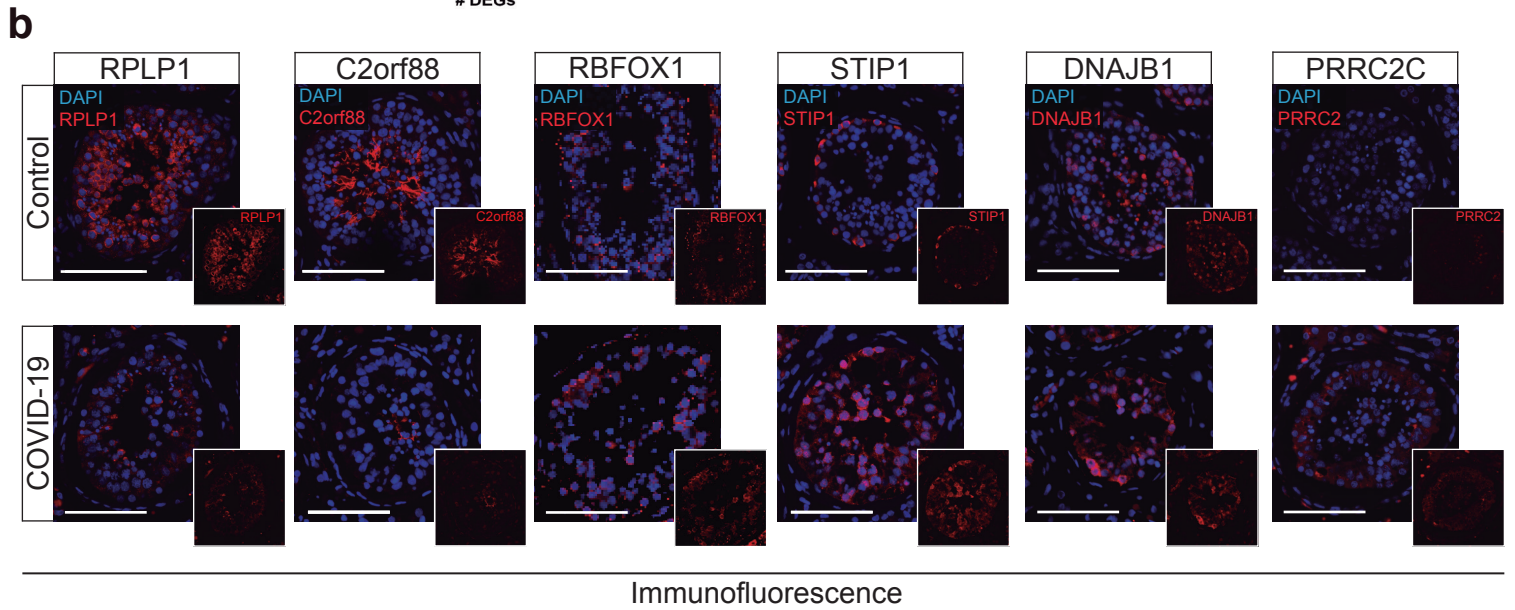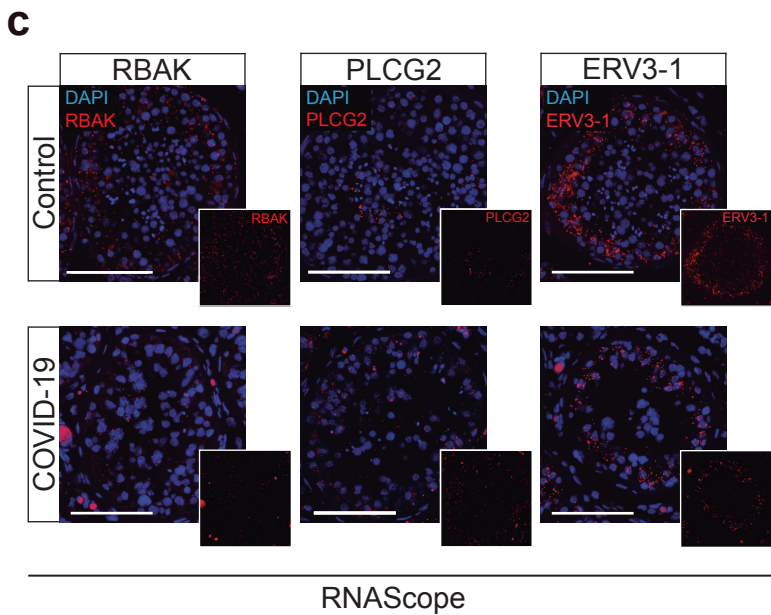

Supplement: Supplementary file 10 [file 75ba5ec3b6e6fda2d70b3dcd.pdf]

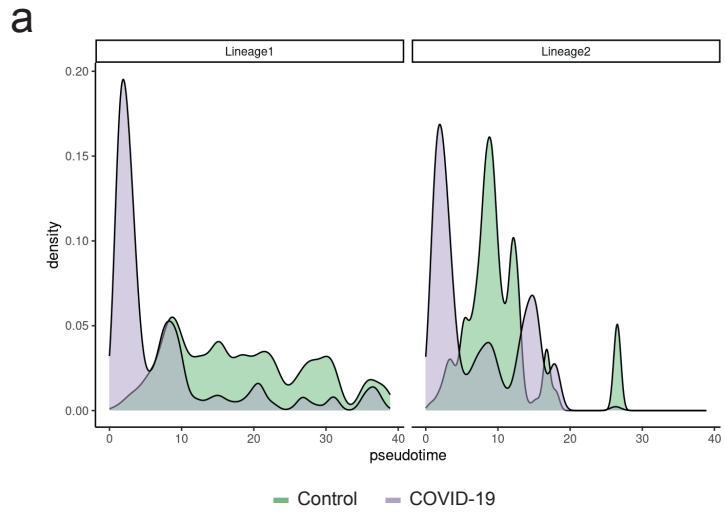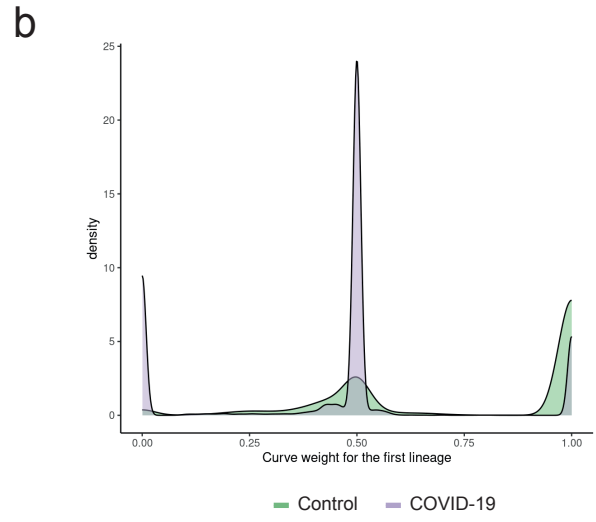

Supplement: Supplementary file 11 [file 7bae4f4a40424f6374f8f7fd.pdf]

**a***Cell death markers*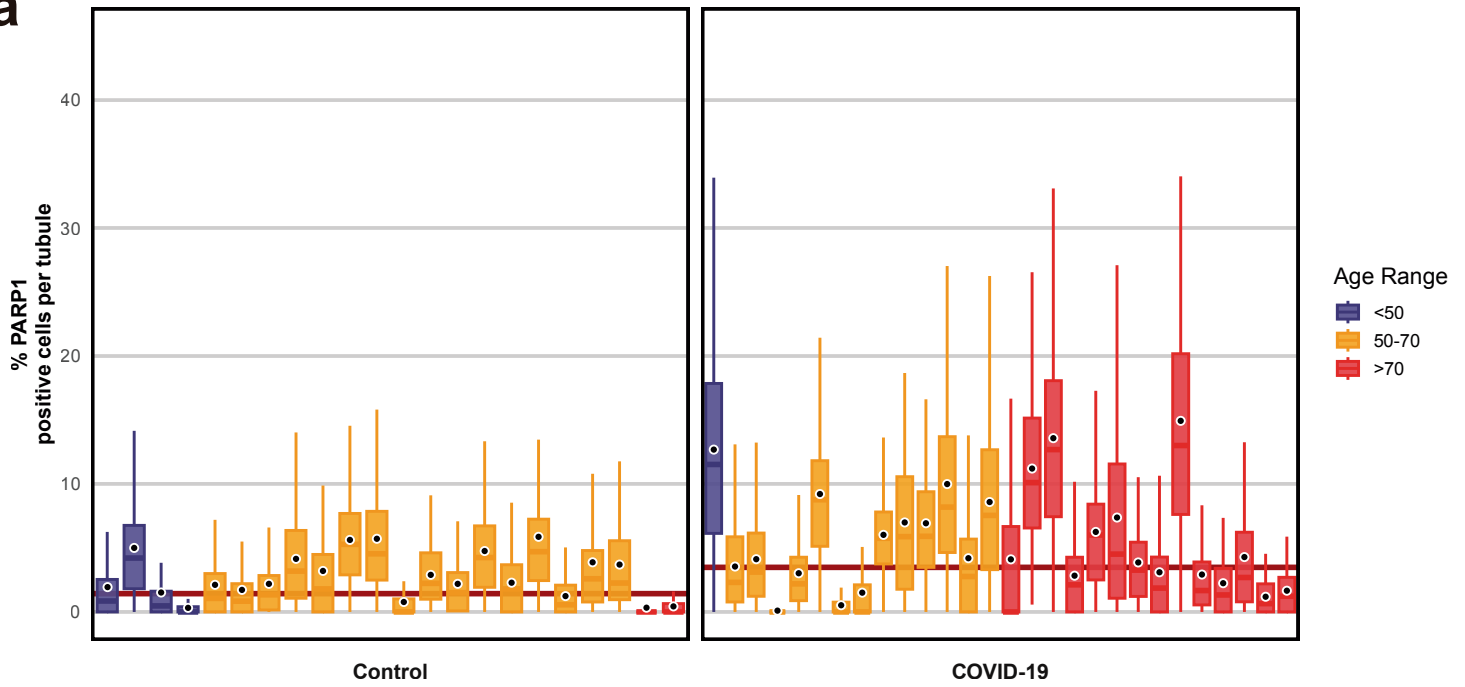**b***Cell death markers*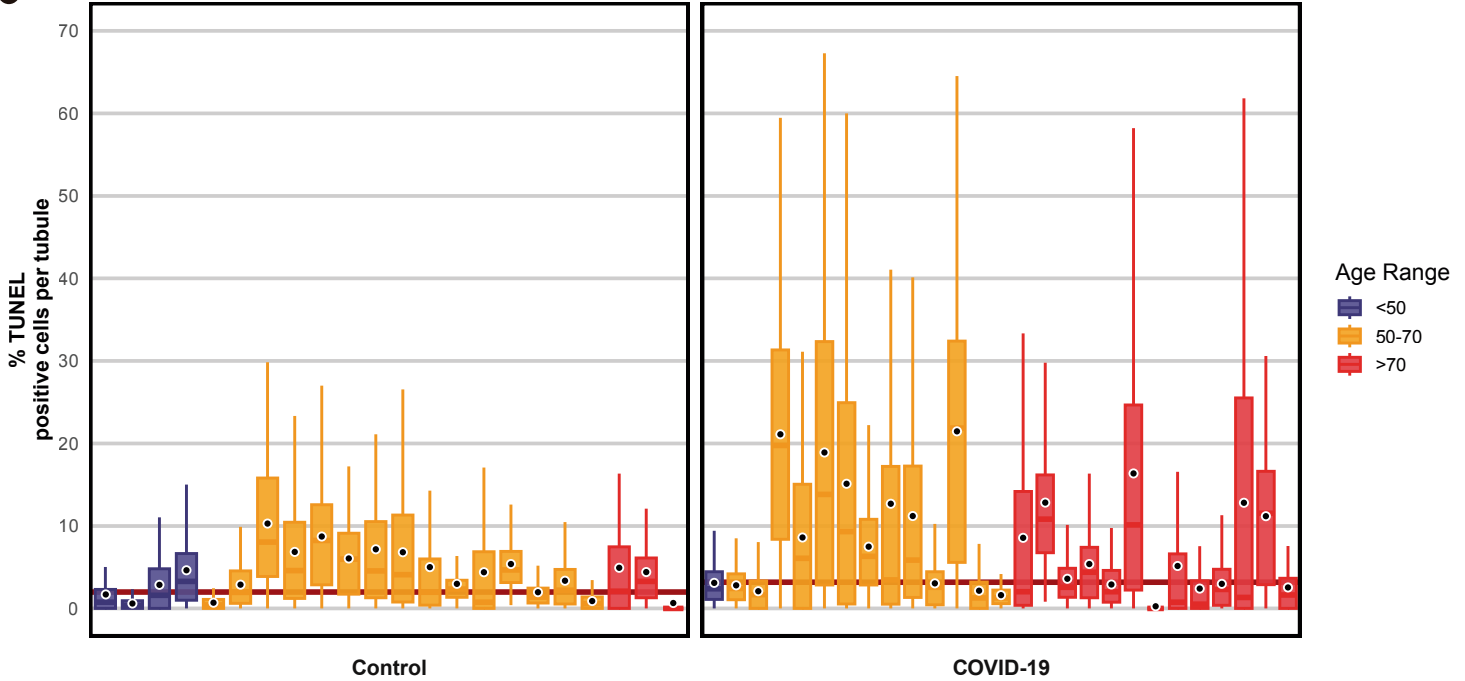**c***Immune cell infiltrate markers*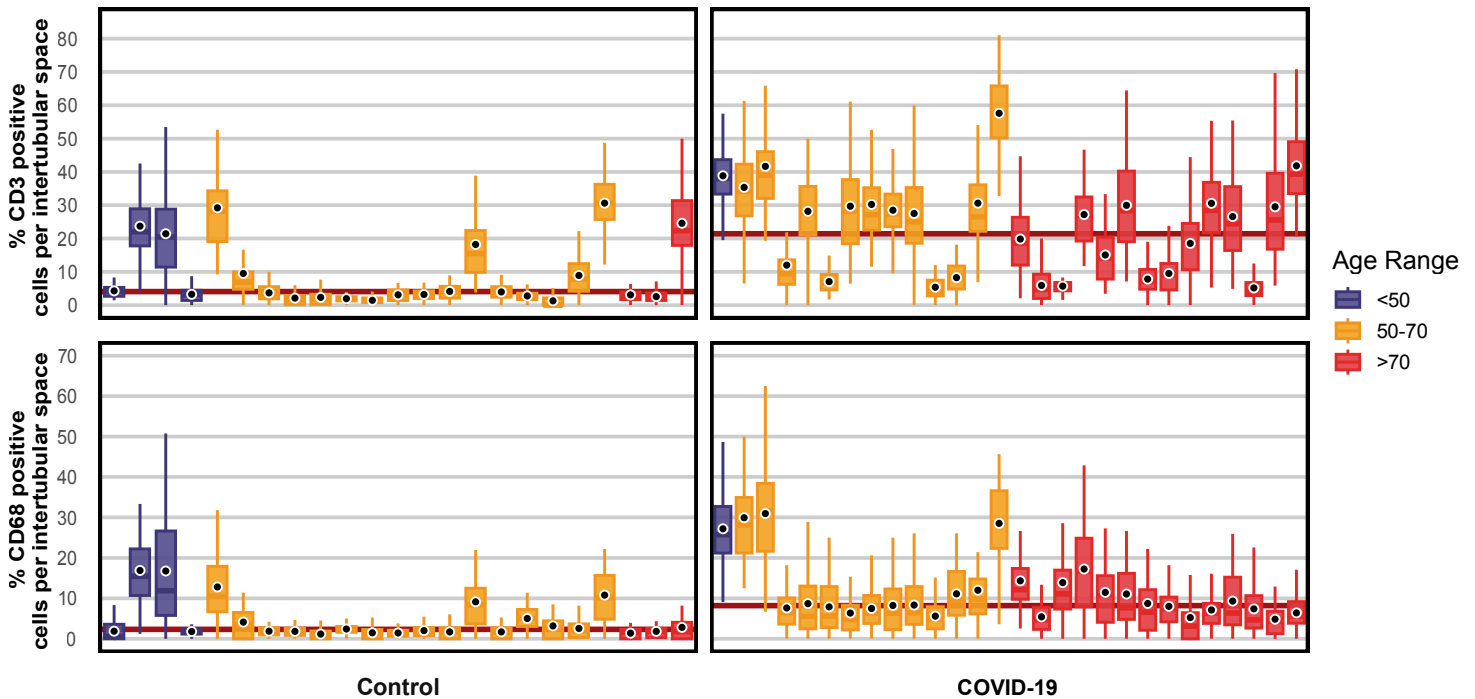

Supplement: Supplementary file 12 [file 7bb88a221b95fd910946b080.pdf]

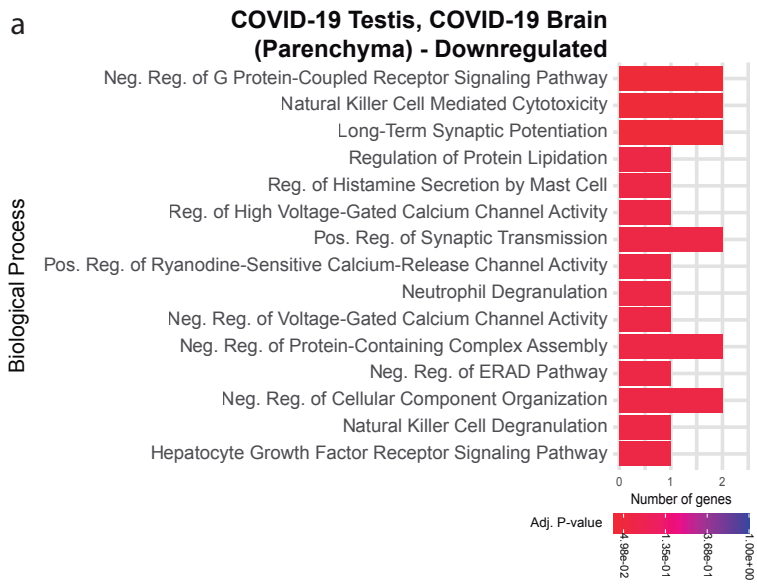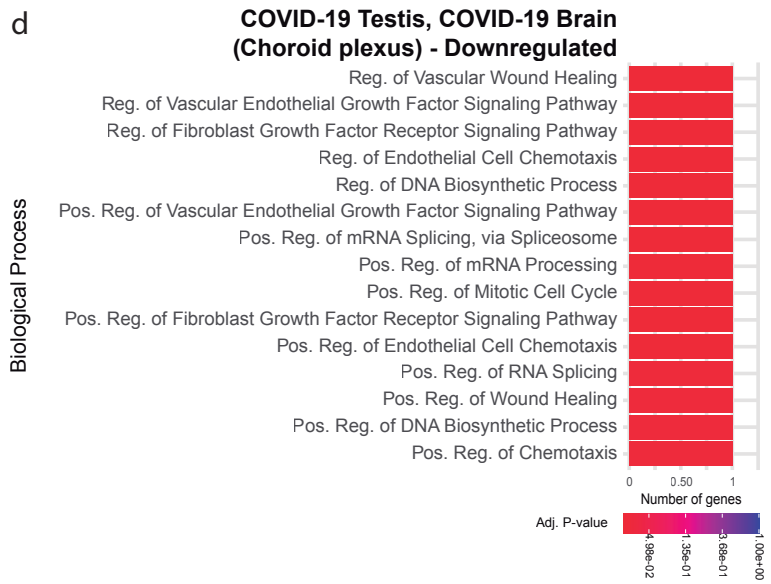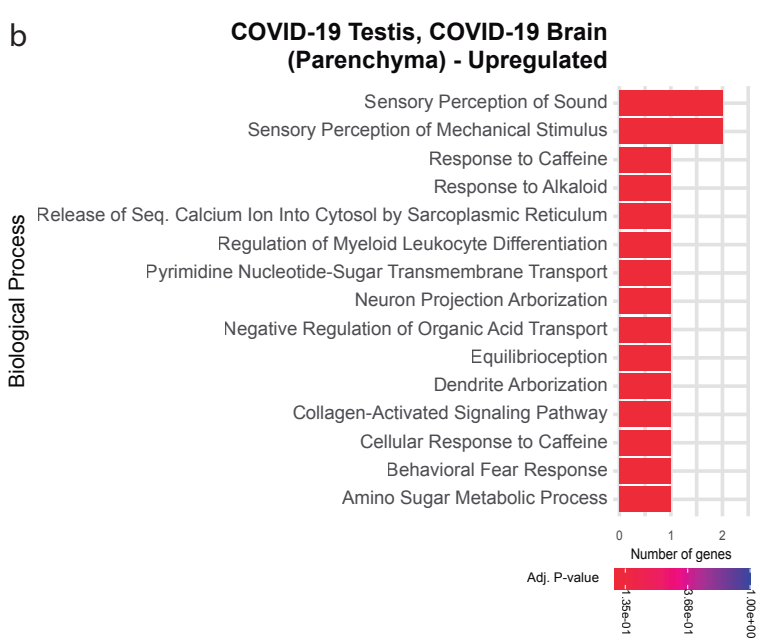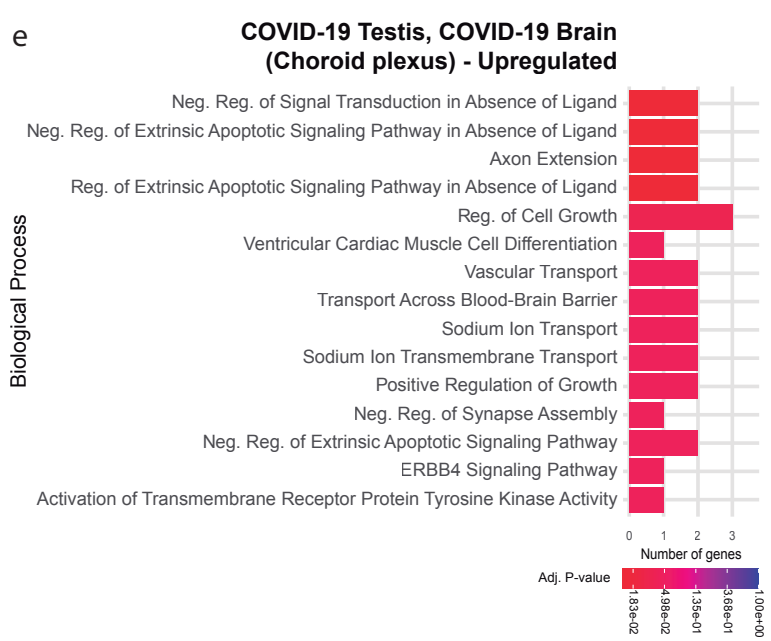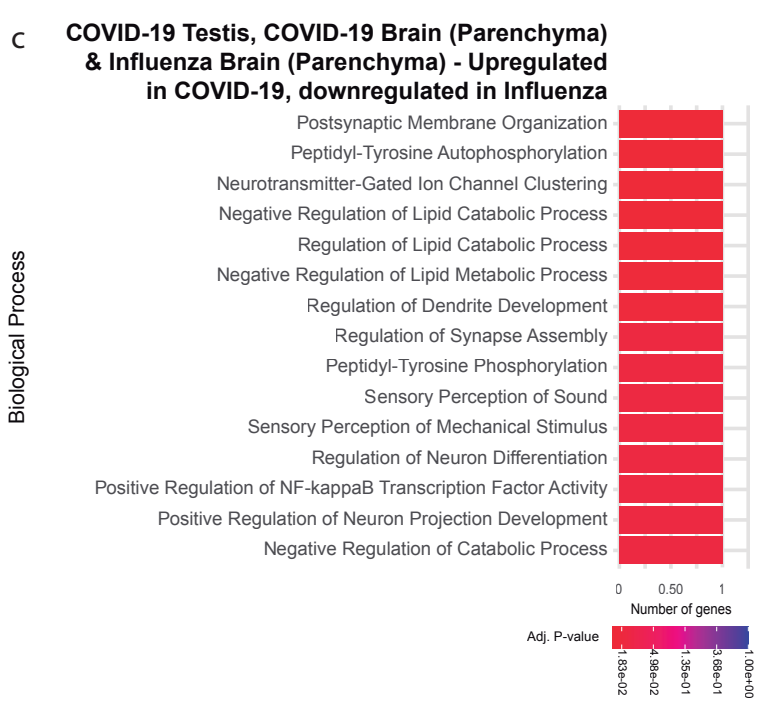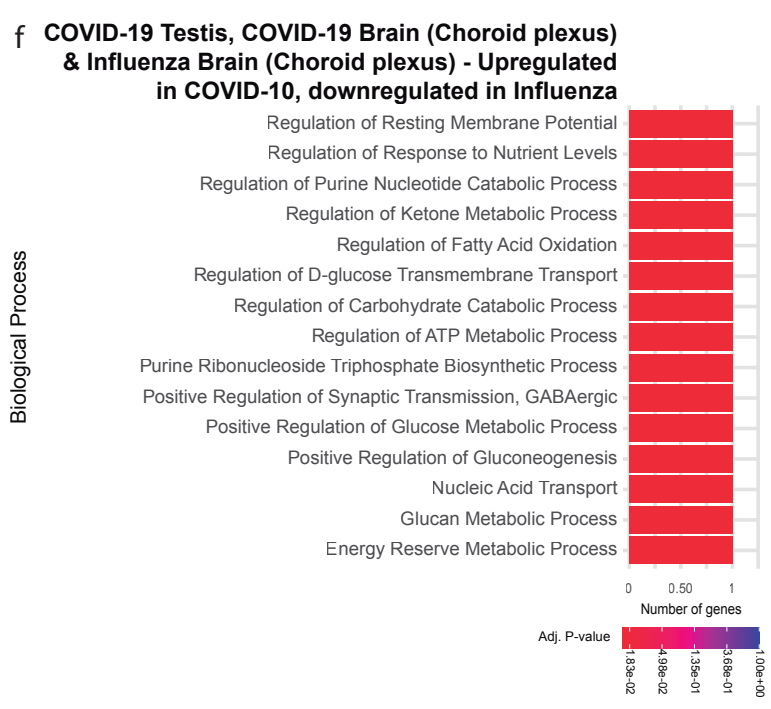

Supplement: Supplementary file 13 [file 832626526d1098a312359d8f.pdf]

**a***Sertoli cells*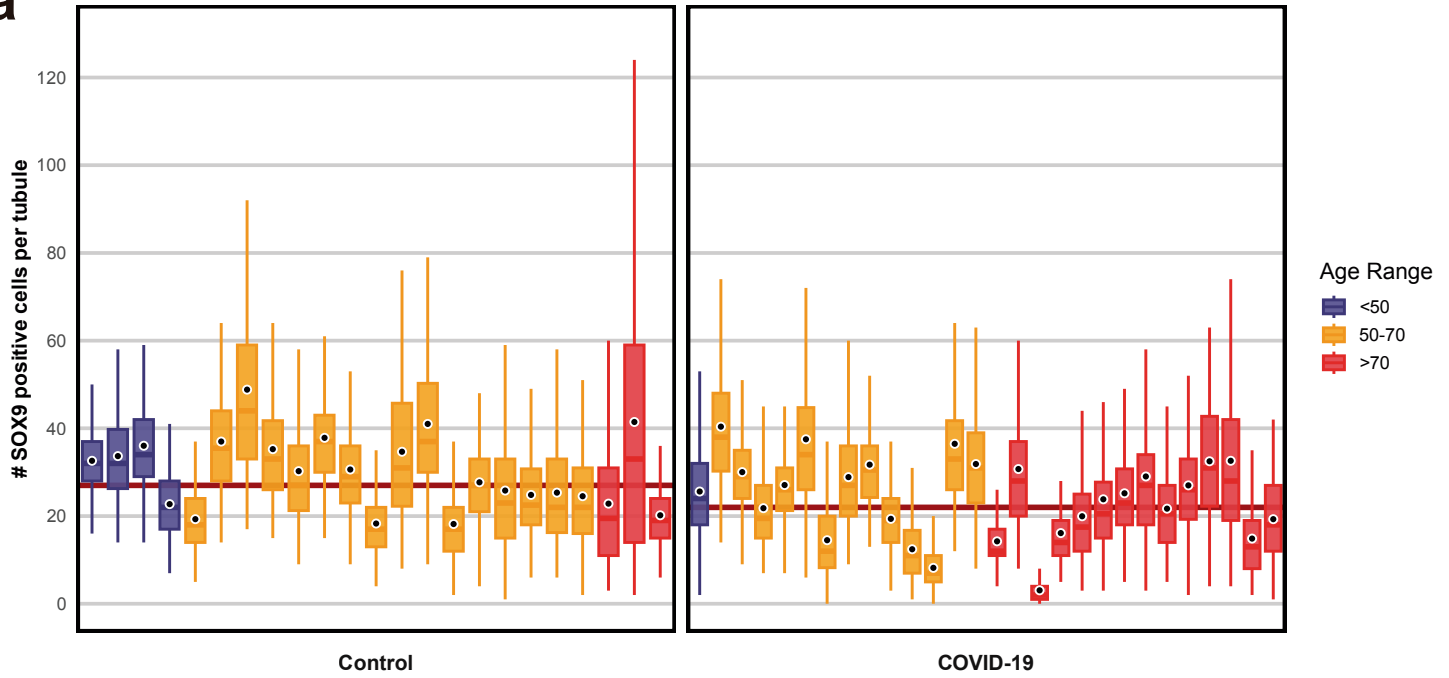**b**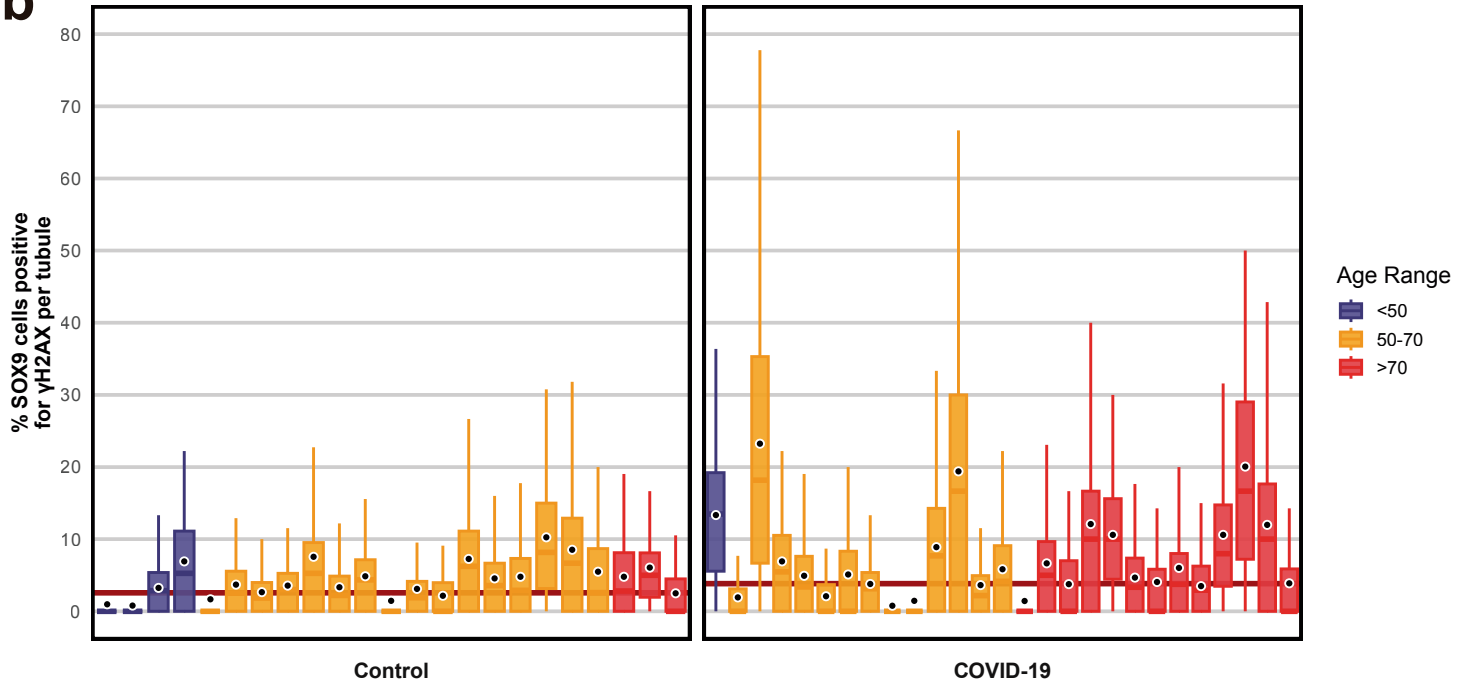**c**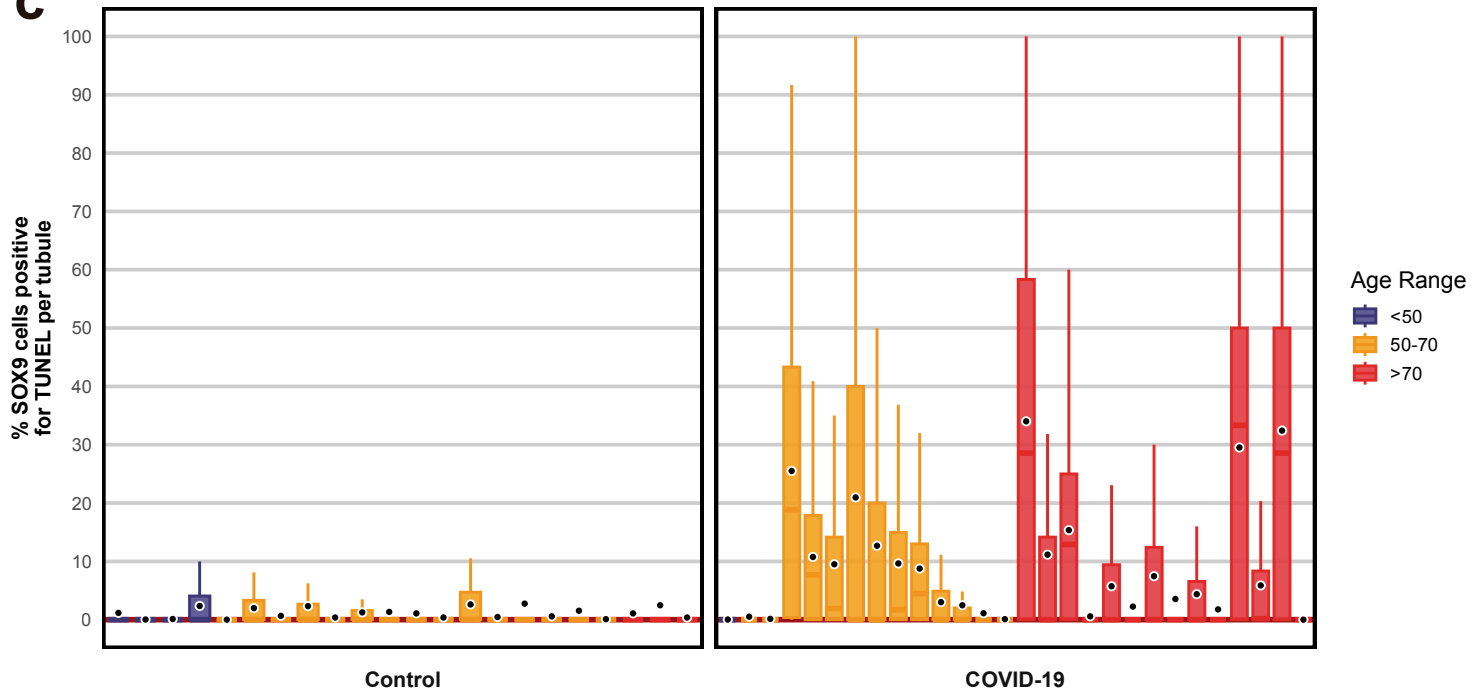

Supplement: Supplementary file 14 [file 902d24db1b03f8503beb3dbe.pdf]

**a** *Spermatogonial stem cells*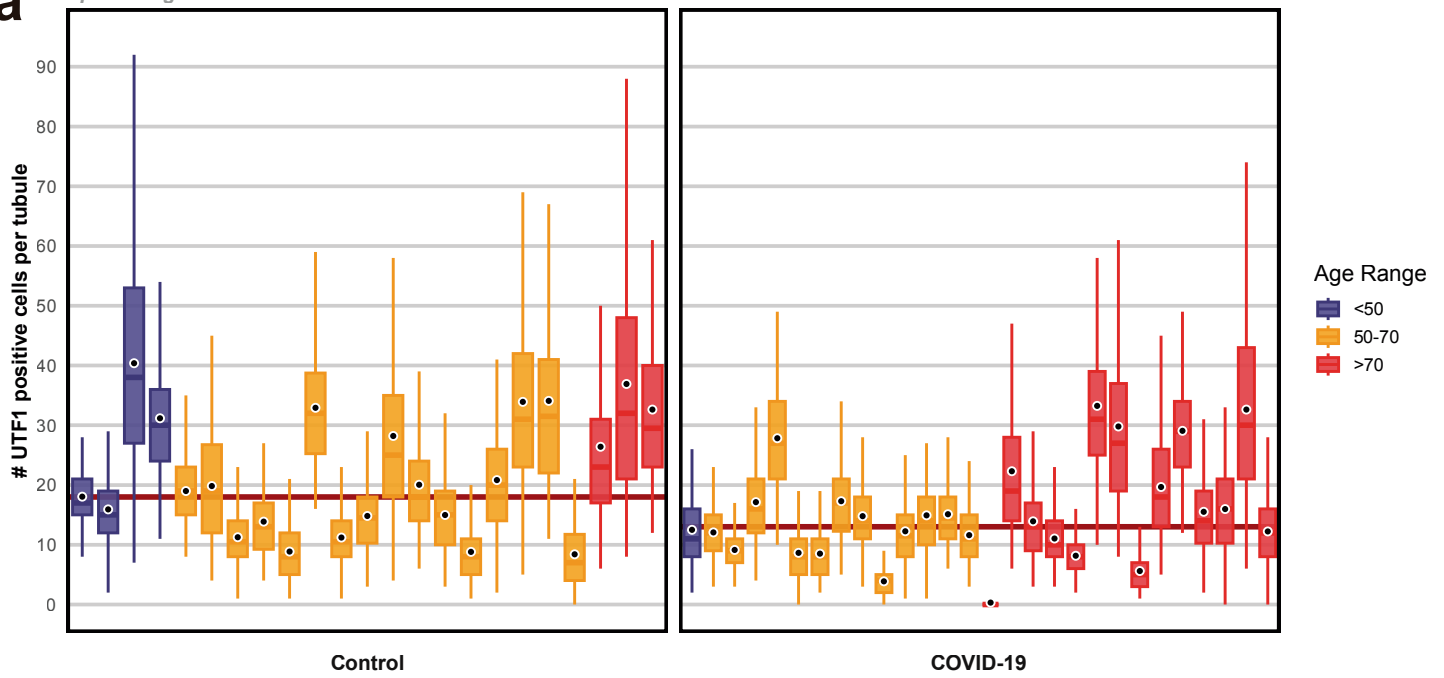**b**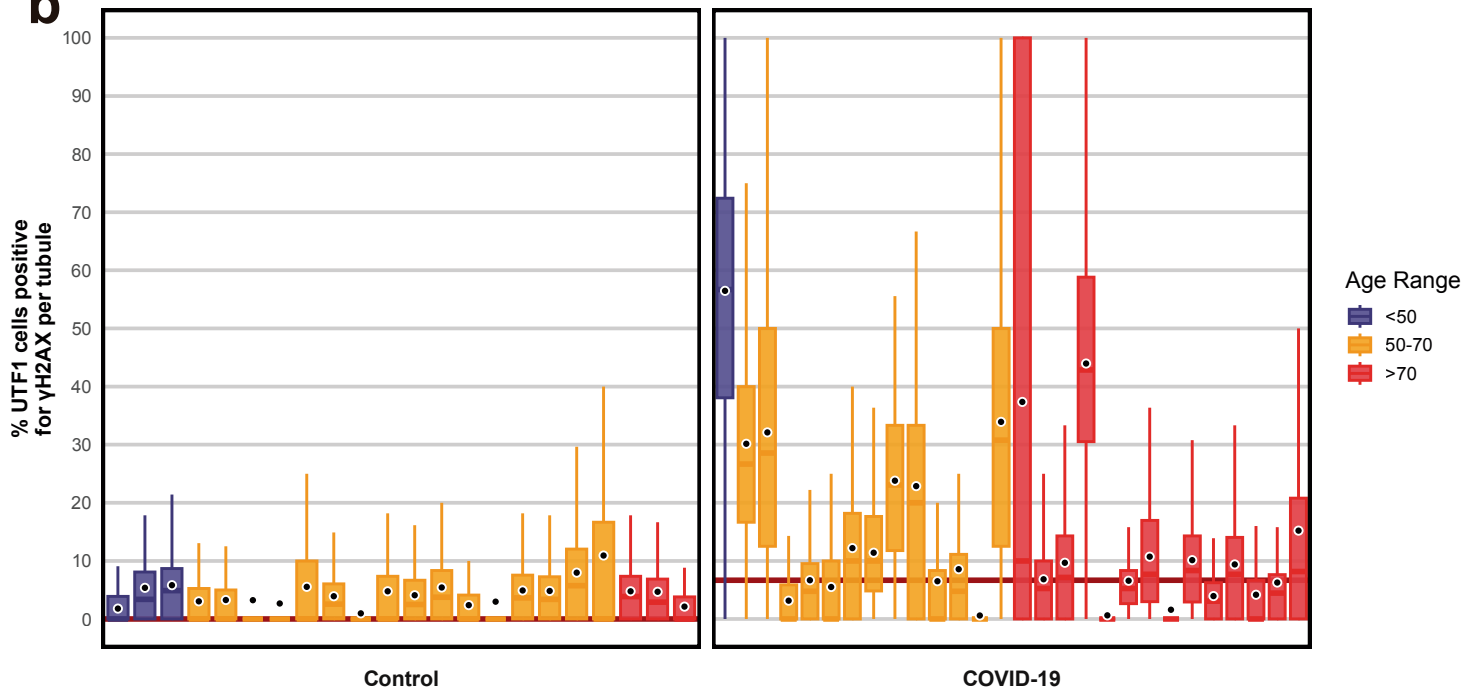**c**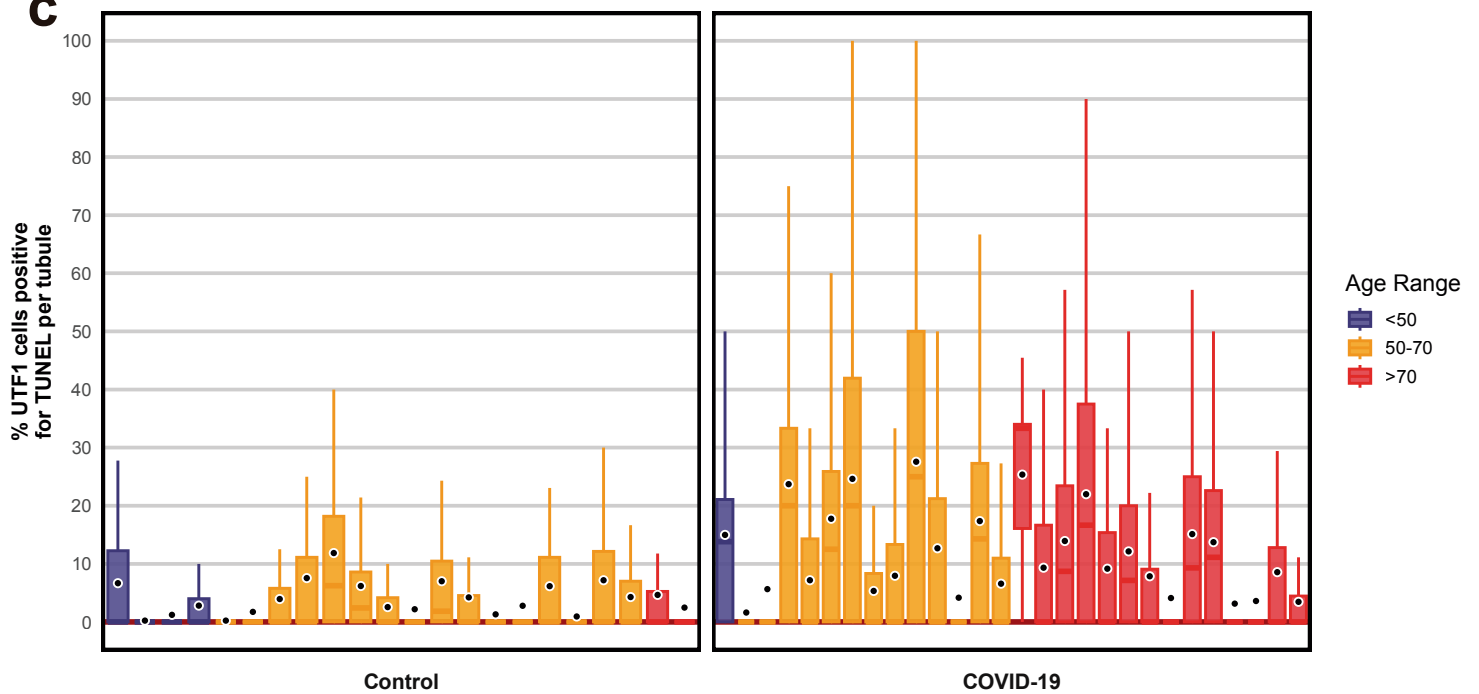

Supplement: Supplementary file 18 [file b85285f41bd66e468391b784.pdf]

**a**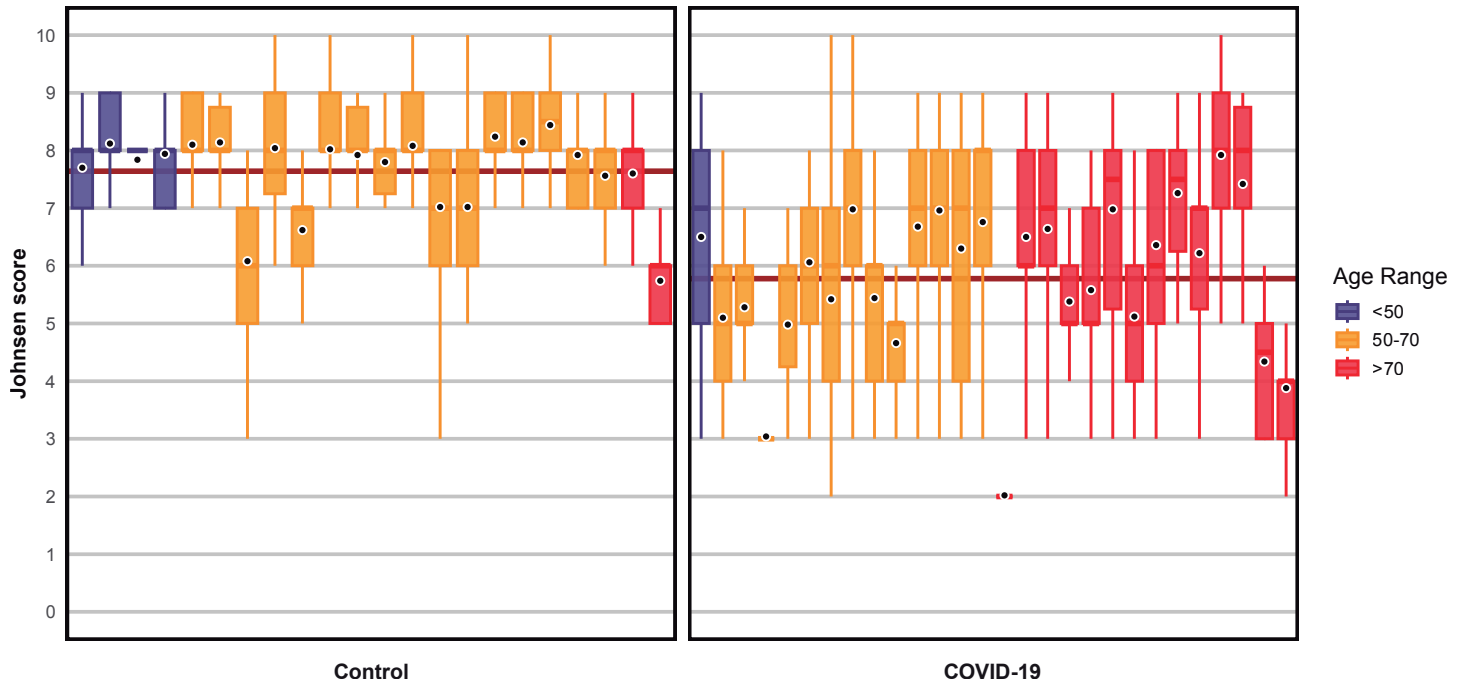**b**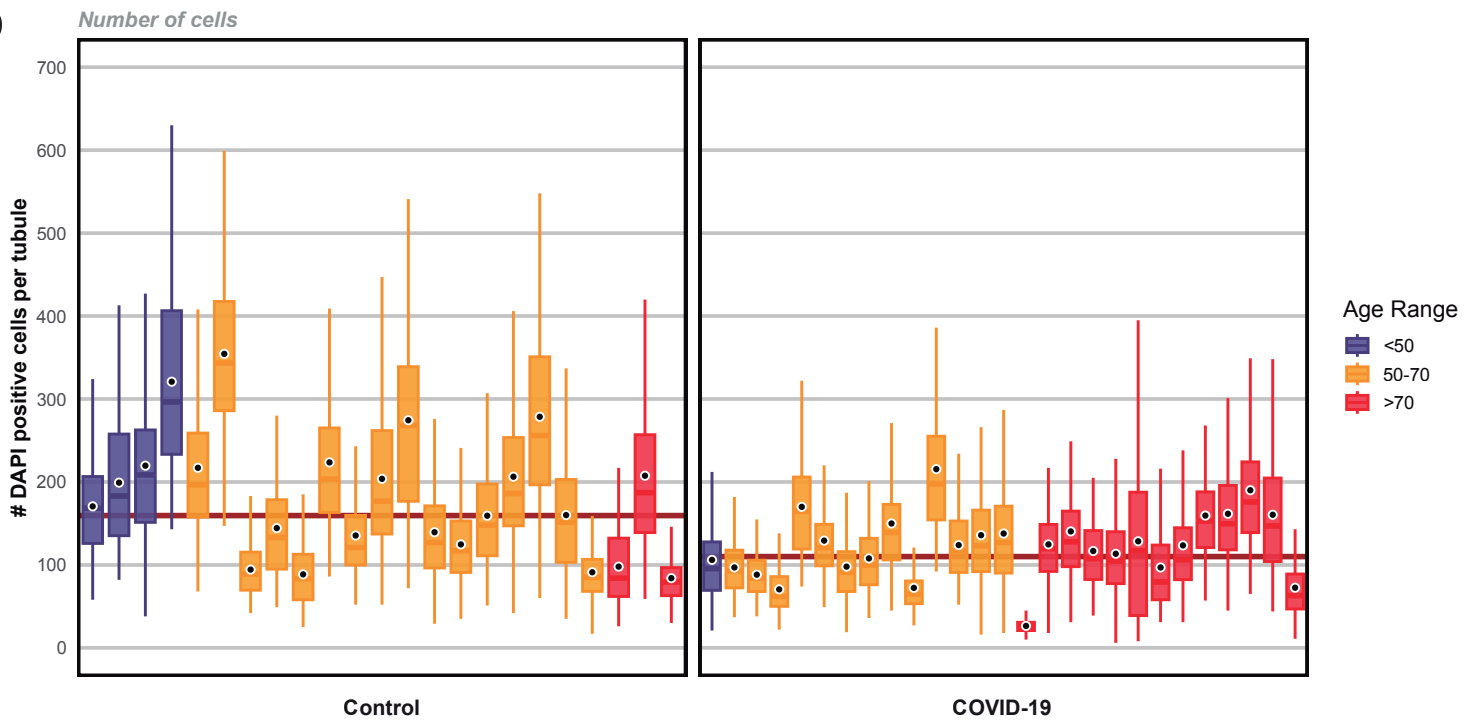

Supplement: Supplementary file 21 [file ea52aec98721a33462a31363.pdf]
